# Supplementary material for: Bone protein “extractomics”: comparing the efficiency of bone protein extractions ofGallus gallusin tandem mass spectrometry, with an eye towards paleoproteomics
Source: PeerJ journal article supplement (doi:10.7717/peerj.2603), 2016-10-27

## Total Protein Recovery (Demineralization Fractions)

■ Chicken (mg) □ Buffer (mg)

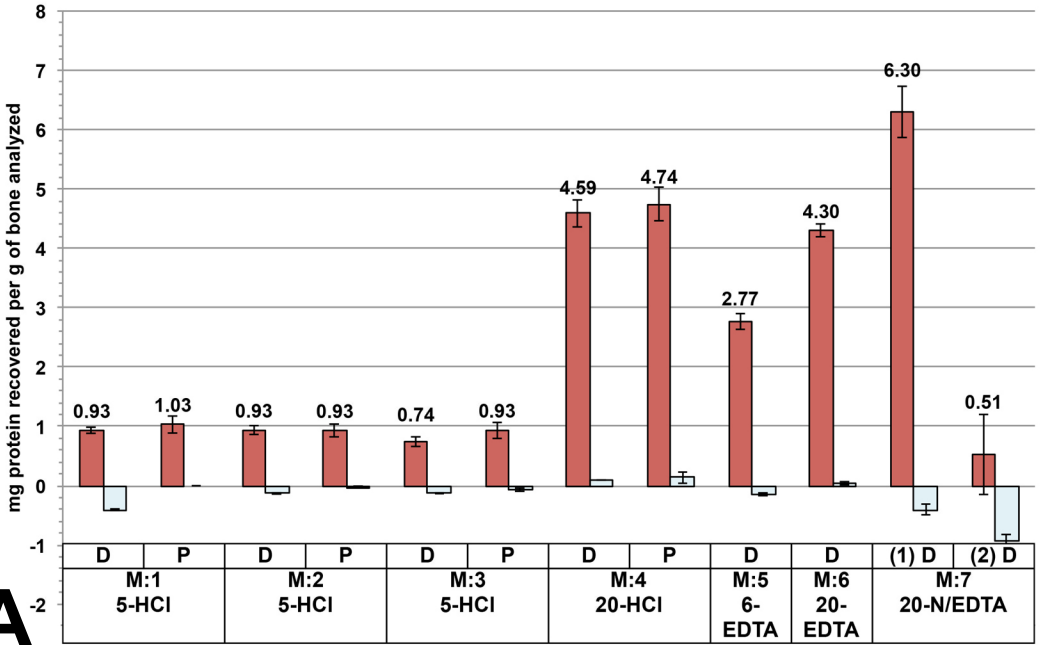

## Total Protein Recovery (Solubilization Fractions)

■ Chicken (mg) □ Buffer (mg)

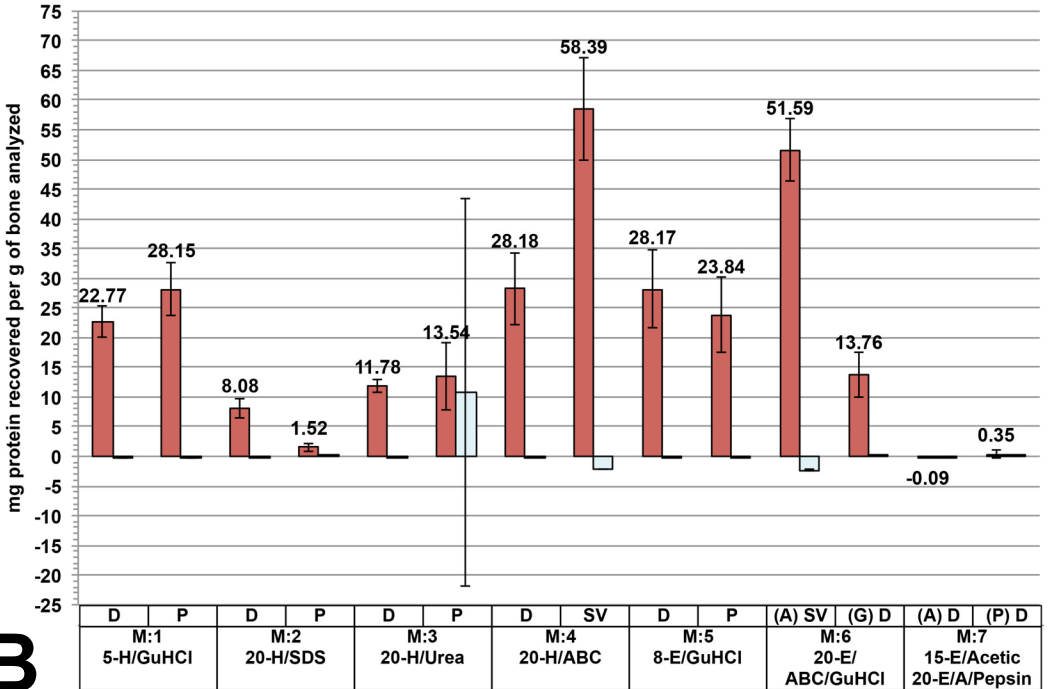

Supplement: Figure_S2._Protein_Recovery_06.06.16.pdf [file Figure_S2._Protein_Recovery_06.06.16.pdf]
