# Supplementary material for: Bone protein “extractomics”: comparing the efficiency of bone protein extractions ofGallus gallusin tandem mass spectrometry, with an eye towards paleoproteomics
Source: PeerJ journal article supplement (doi:10.7717/peerj.2603), 2016-10-27

## Immunoreactivity with Anti-chicken Collagen I Antibodies (Demineralization Fractions)

Chicken Primary  
 Chicken Secondary Control  
 Buffer Primary  
 Buffer Secondary Control

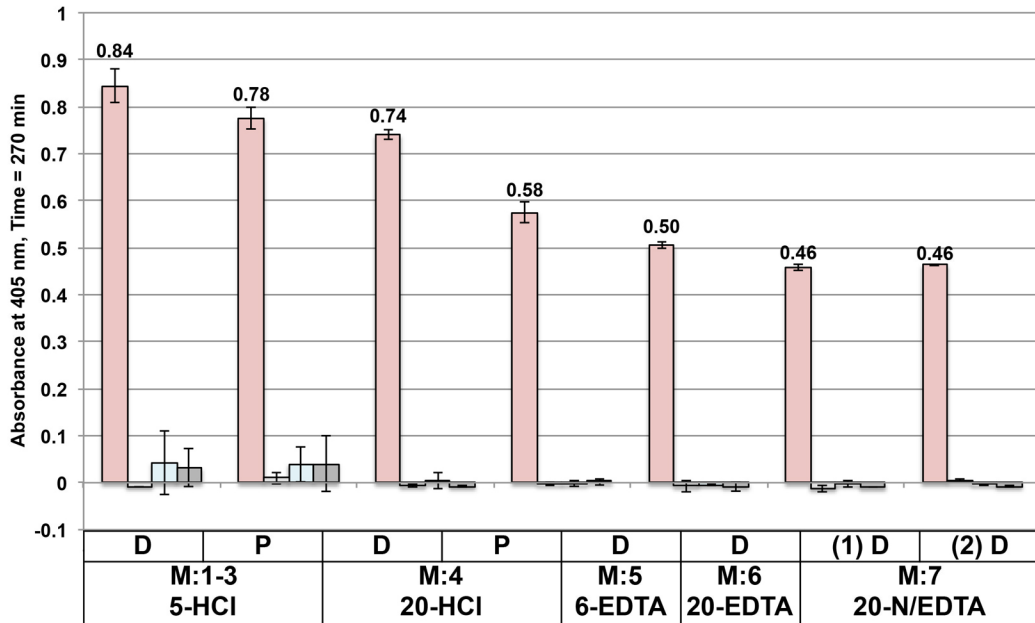

Supplement: Figure_S3._Co1-ELISAs_06.06.16.pdf [file Figure_S3._Co1-ELISAs_06.06.16.pdf]
