# Supplementary material for: Bone protein “extractomics”: comparing the efficiency of bone protein extractions ofGallus gallusin tandem mass spectrometry, with an eye towards paleoproteomics
Source: PeerJ journal article supplement (doi:10.7717/peerj.2603), 2016-10-27
Supplement: Figure_S4._Hemo-ELISAs_06.06.16.pdf [file Figure_S4._Hemo-ELISAs_06.06.16.pdf]

## Immunoreactivity with Anti-alligator Hemoglobin (1:850) (Demineralization Fractions)

Chicken Primary    
  Chicken Secondary Control    
  Buffer Primary    
  Buffer Secondary Control

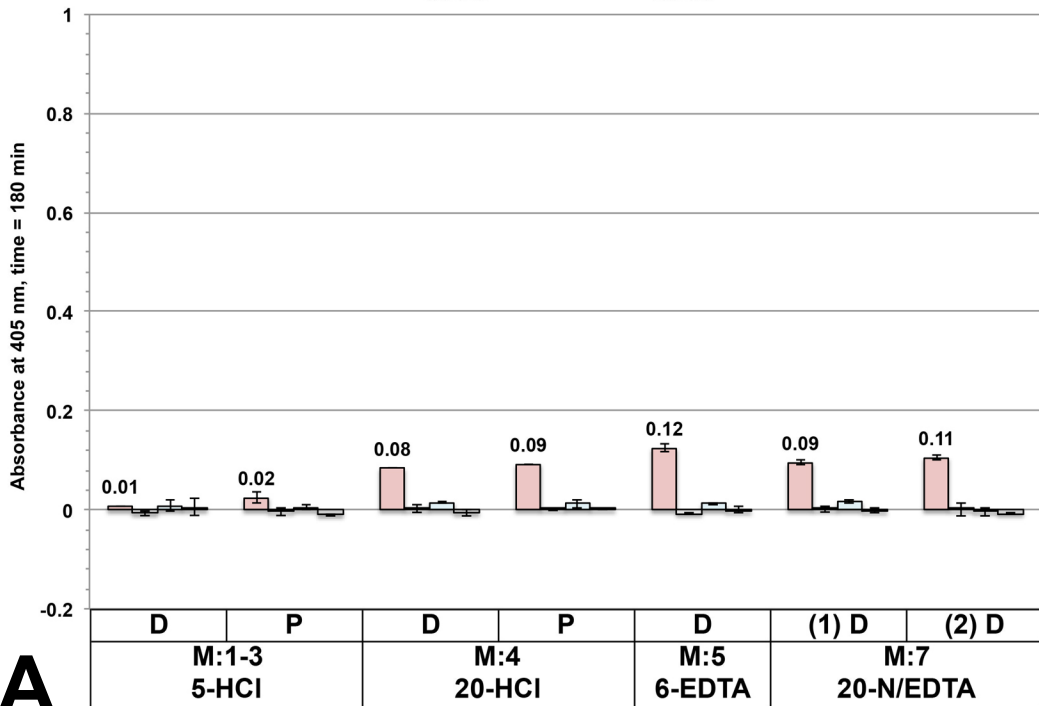

**A**

## Immunoreactivity with Anti-alligator Hemoglobin (1:700) (Solubilization Fractions)

Chicken Primary    
  Chicken Secondary Control    
  Buffer Primary    
  Buffer Secondary Control

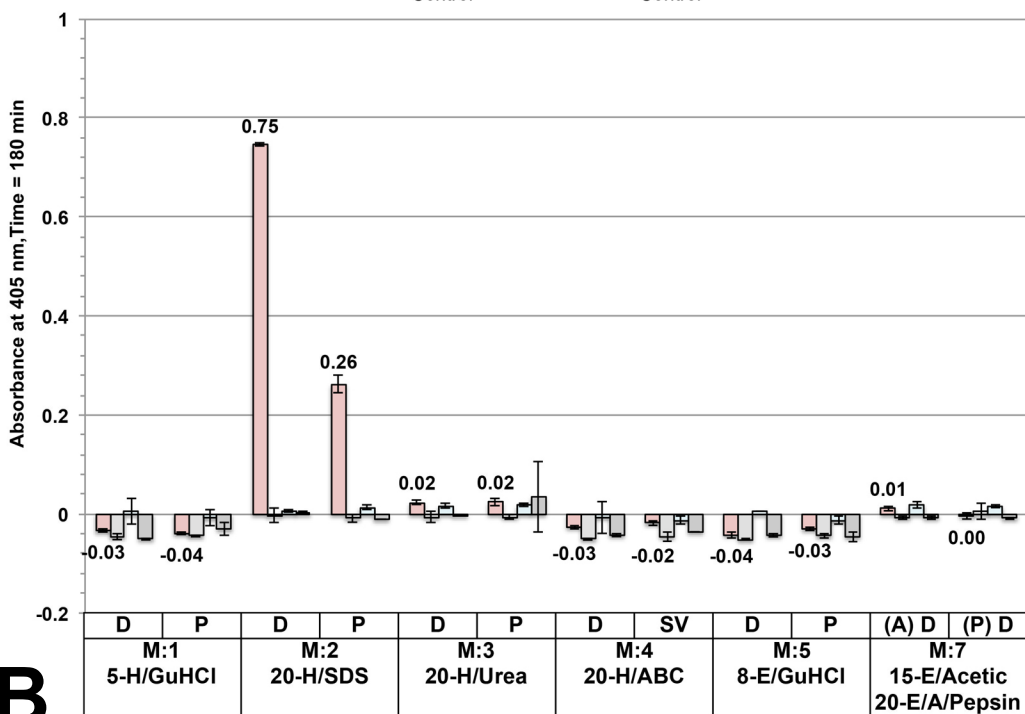

**B**
