# Supplementary material for: Bone protein “extractomics”: comparing the efficiency of bone protein extractions of Gallus gallus in tandem mass spectrometry, with an eye towards paleoproteomics
Source: PubMed Central journal article supplement (PMC5088622; doi:10.7717/peerj.2603), 2016-10-27
Supplement: peerj-04-2603-s001.pdf [file peerj-04-2603-s001.pdf]

## Pellet Weight vs. Protein Yield (Deminerzalized Fractions)

□ Chicken Pellet (mg)   
 ■ Chicken Recovered Protein (mg)   
 □ Buffer Pellet (mg)   
 ■ Buffer Recovered Protein (mg)

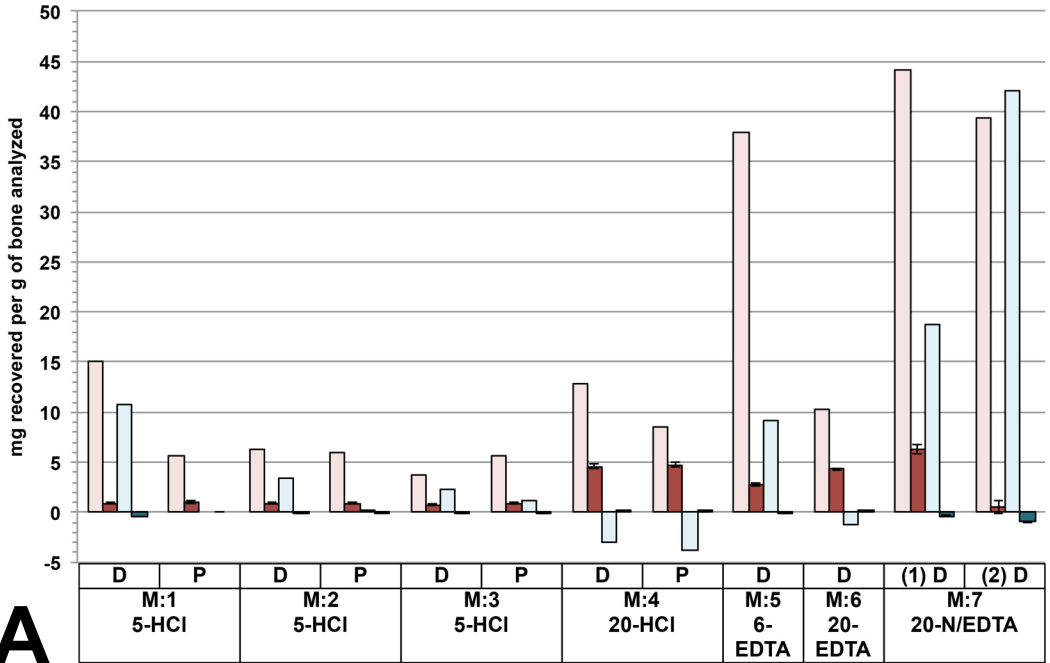

**A**

## Pellet Weight vs. Protein Yield (Solubilization Fractions)

□ Chicken Pellet (mg)   
 ■ Chicken Recovered Protein (mg)   
 □ Buffer Pellet (mg)   
 ■ Buffer Recovered Protein (mg)

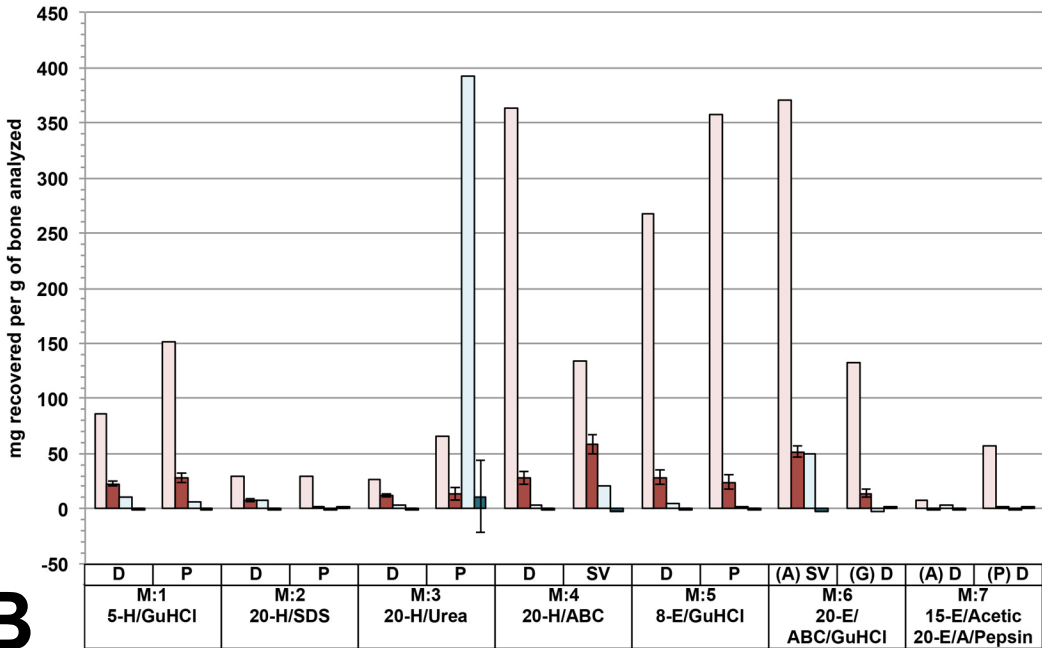

**B**
