# Supplementary material for: Bone protein “extractomics”: comparing the efficiency of bone protein extractions of Gallus gallus in tandem mass spectrometry, with an eye towards paleoproteomics
Source: PeerJ. 2016 Oct 27;4:e2603. doi: 10.7717/peerj.2603 (PMC5088622; doi:10.7717/peerj.2603)
Supplement: Table S5 — Peptides listed by fraction and sample # (two were analyzed for each fraction). In this list, peptides corresponding to common lab contaminants (e.g., keratin) have been eliminated, and duplicate matches of one spectrum to multiple protein accession IDs have been reduced to a single occurrence. Peptides of proteins that were only identified by 1 peptide across all fractions have been highlighted in red. These were not used in comparison statistics or analyses. [file peerj-04-2603-s009.xlsx]

## Sheet: Peptides
Table S5. Masterlist of peptides analyzed in this study.
Peptides listed by fraction and sample # (two were analyzed for each fraction). In this list, peptides corresponding to common lab contaminants (e.g., keratin) have been eliminated, and duplicate matches of one spectrum to multiple protein accession IDs have been reduced to a single occurrence. Peptides of proteins that were only identified by 1 peptide across all fractions have been highlighted …
Method	Identifier	Reagent	Volume	Fraction	Buffer Removal	Sample #	Protein Group	Protein ID	Name	Description	Protein Accession	Peptide	Unique	-10lgP	Mass	Length	ppm	m/z	z	RT	Area	Scan	#Spec	Start	End	PTM	AScore
1-3	5-HCl-D	HCl	5 mL/g	Demineralization	Dialysis	1	13	4014	26S Protease	26S protease regulatory subunit 4 OS=Gallus gallus GN=PSMC1 PE=2 SV=1	Q90732|PRS4_CHICK	H.GPGGGK(+15.99).K	Y	20.38	487.239	6	7.3	488.25	1	46.07		F17:750	1	10	15	Oxidation or Hydroxylation	K6:Oxidation or Hydroxylation:6.65
1-3	5-HCl-D	HCl	5 mL/g	Demineralization	Dialysis	1	2	4	Collagen I, alpha 1	Collagen alpha-1(I) chain OS=Gallus gallus GN=COL1A1 PE=1 SV=3	P02457|CO1A1_CHICK	R.DGAAGPKGDRGETGPAGPP(+15.99)GAP(+15.99)GAPGAP(+15.99)GPVGPAGK.N	Y	23.71	3092.49	36	1.5	774.131	4	13.4		F17:102	2	1016	1051	Oxidation or Hydroxylation	P19:Oxidation or Hydroxylation:2.98;P22:Oxidation or Hydroxylation:0.00;P28:Oxidation or Hydroxylation:22.85
1-3	5-HCl-D	HCl	5 mL/g	Demineralization	Dialysis	1	2	4	Collagen I, alpha 1	Collagen alpha-1(I) chain OS=Gallus gallus GN=COL1A1 PE=1 SV=3	P02457|CO1A1_CHICK	L.QGP(+15.99)PGPPGAP(+15.99)GEQGPSGASGPAGPR.G	Y	36.57	2211.03	25	1.2	738.018	3	13.79		F17:112	2	1106	1130	Oxidation or Hydroxylation	P3:Oxidation or Hydroxylation:0.00;P10:Oxidation or Hydroxylation:41.59
1-3	5-HCl-D	HCl	5 mL/g	Demineralization	Dialysis	1	2	4	Collagen I, alpha 1	Collagen alpha-1(I) chain OS=Gallus gallus GN=COL1A1 PE=1 SV=3	P02457|CO1A1_CHICK	K.GDRGETGPAGP(+15.99)PGAP(+15.99)GAPGAP(+15.99)GPVGPAGK.N	Y	23.97	2496.2	29	0.8	833.074	3	13.88		F17:114	1	1023	1051	Oxidation or Hydroxylation	P11:Oxidation or Hydroxylation:0.00;P15:Oxidation or Hydroxylation:0.00;P21:Oxidation or Hydroxylation:18.53
1-3	5-HCl-D	HCl	5 mL/g	Demineralization	Dialysis	1	2	4	Collagen I, alpha 1	Collagen alpha-1(I) chain OS=Gallus gallus GN=COL1A1 PE=1 SV=3	P02457|CO1A1_CHICK	L.QGPP(+15.99)GP(+15.99)PGAPGEQGPSGASGPAGPR.G	Y	24.33	2211.03	25	1.9	1106.52	2	14.28		F17:124	1	1106	1130	Oxidation or Hydroxylation	P4:Oxidation or Hydroxylation:17.01;P6:Oxidation or Hydroxylation:0.00
1-3	5-HCl-D	HCl	5 mL/g	Demineralization	Dialysis	1	2	4	Collagen I, alpha 1	Collagen alpha-1(I) chain OS=Gallus gallus GN=COL1A1 PE=1 SV=3	P02457|CO1A1_CHICK	L.TGPIGPP(+15.99)GPAGAP(+15.99)GDKGEAGPP(+15.99)GPAGPTGAR.G	Y	39.83	2708.32	31	1.3	903.78	3	14.53		F17:128	2	755	785	Oxidation or Hydroxylation	P7:Oxidation or Hydroxylation:28.86;P13:Oxidation or Hydroxylation:28.74;P22:Oxidation or Hydroxylation:15.73
1-3	5-HCl-D	HCl	5 mL/g	Demineralization	Dialysis	1	2	4	Collagen I, alpha 1	Collagen alpha-1(I) chain OS=Gallus gallus GN=COL1A1 PE=1 SV=3	P02457|CO1A1_CHICK	L.TGPIGP(+15.99)PGPAGAPGDK(+15.99)GEAGPP(+15.99)GPAGPTGAR.G	Y	37.18	2708.32	31	0.7	678.087	4	14.93		F17:139	1	755	785	Oxidation or Hydroxylation	P6:Oxidation or Hydroxylation:7.77;K16:Oxidation or Hydroxylation:25.58;P22:Oxidation or Hydroxylation:17.01
1-3	5-HCl-D	HCl	5 mL/g	Demineralization	Dialysis	1	2	4	Collagen I, alpha 1	Collagen alpha-1(I) chain OS=Gallus gallus GN=COL1A1 PE=1 SV=3	P02457|CO1A1_CHICK	F.SGLQGPP(+15.99)GPP(+15.99)GAP(+15.99)GEQGPSGASGPAGPR.G	Y	46.99	2484.16	28	2.9	1243.09	2	15.63		F17:159	4	1103	1130	Oxidation or Hydroxylation	P7:Oxidation or Hydroxylation:17.01;P10:Oxidation or Hydroxylation:87.62;P13:Oxidation or Hydroxylation:107.29
1-3	5-HCl-D	HCl	5 mL/g	Demineralization	Dialysis	1	2	4	Collagen I, alpha 1	Collagen alpha-1(I) chain OS=Gallus gallus GN=COL1A1 PE=1 SV=3	P02457|CO1A1_CHICK	Q.GFQGPP(+15.99)GEP(+15.99)GEP(+15.99)GASGPMGPR.G	Y	34.52	2025.88	21	1.1	1013.95	2	16.94		F17:199	2	189	209	Oxidation or Hydroxylation	P6:Oxidation or Hydroxylation:14.02;P9:Oxidation or Hydroxylation:55.36;P12:Oxidation or Hydroxylation:91.35
1-3	5-HCl-D	HCl	5 mL/g	Demineralization	Dialysis	1	2	4	Collagen I, alpha 1	Collagen alpha-1(I) chain OS=Gallus gallus GN=COL1A1 PE=1 SV=3	P02457|CO1A1_CHICK	R.GLTGPIGPP(+15.99)GPAGAPGD(+15.99)KGEAGPP(+15.99)GPAGPTGAR.G	Y	47.78	2878.42	33	1.8	960.483	3	17.21		F17:208	7	753	785	Oxidation or Hydroxylation	P9:Oxidation or Hydroxylation:69.71;D17:Oxidation or Hydroxylation:66.45;P24:Oxidation or Hydroxylation:80.85
1-3	5-HCl-D	HCl	5 mL/g	Demineralization	Dialysis	1	2	4	Collagen I, alpha 1	Collagen alpha-1(I) chain OS=Gallus gallus GN=COL1A1 PE=1 SV=3	P02457|CO1A1_CHICK	K.SAGVAVP(+15.99)GPMGPAGPR.G	Y	21.78	1435.72	16	0.7	718.87	2	17.68		F17:224	1	161	176	Oxidation or Hydroxylation	P7:Oxidation or Hydroxylation:45.01
1-3	5-HCl-D	HCl	5 mL/g	Demineralization	Dialysis	1	2	4	Collagen I, alpha 1	Collagen alpha-1(I) chain OS=Gallus gallus GN=COL1A1 PE=1 SV=3	P02457|CO1A1_CHICK	Q.GFQGPPGEP(+15.99)GEP(+15.99)GASGPMGPR.G	Y	28.34	2009.89	21	1.8	1005.95	2	17.93		F17:232	2	189	209	Oxidation or Hydroxylation	P9:Oxidation or Hydroxylation:68.31;P12:Oxidation or Hydroxylation:30.64
1-3	5-HCl-D	HCl	5 mL/g	Demineralization	Dialysis	1	2	4	Collagen I, alpha 1	Collagen alpha-1(I) chain OS=Gallus gallus GN=COL1A1 PE=1 SV=3	P02457|CO1A1_CHICK	K.DGLNGLP(+15.99)GPIGP(+15.99)PGPR(+15.99).G	Y	33.29	1560.79	16	0.7	781.403	2	20.43		F17:307	3	1142	1157	Oxidation or Hydroxylation	P7:Oxidation or Hydroxylation:45.01;P12:Oxidation or Hydroxylation:0.00;R16:Oxidation or Hydroxylation:0.00
1-3	5-HCl-D	HCl	5 mL/g	Demineralization	Dialysis	1	2	4	Collagen I, alpha 1	Collagen alpha-1(I) chain OS=Gallus gallus GN=COL1A1 PE=1 SV=3	P02457|CO1A1_CHICK	K.DGLNGLP(+15.99)GPIGPP(+15.99)GPR(+15.99).G	Y	32.59	1560.79	16	0.7	781.403	2	20.69		F17:316	1	1142	1157	Oxidation or Hydroxylation	P7:Oxidation or Hydroxylation:36.05;P13:Oxidation or Hydroxylation:0.00;R16:Oxidation or Hydroxylation:0.00
1-3	5-HCl-D	HCl	5 mL/g	Demineralization	Dialysis	1	2	4	Collagen I, alpha 1	Collagen alpha-1(I) chain OS=Gallus gallus GN=COL1A1 PE=1 SV=3	P02457|CO1A1_CHICK	K.DGLNGLP(+15.99)GPIGPPGP(+15.99)R(+15.99).G	Y	32.57	1560.79	16	3.3	781.405	2	41.07		F17:692	1	1142	1157	Oxidation or Hydroxylation	P7:Oxidation or Hydroxylation:14.63;P15:Oxidation or Hydroxylation:5.03;R16:Oxidation or Hydroxylation:3.64
1-3	5-HCl-D	HCl	5 mL/g	Demineralization	Dialysis	1	2	4	Collagen I, alpha 1	Collagen alpha-1(I) chain OS=Gallus gallus GN=COL1A1 PE=1 SV=3	P02457|CO1A1_CHICK	L.QGP(+15.99)PGPP(+15.99)GAP(+15.99)GEQGPSGASGPAGPR.G	Y	36.66	2227.03	25	0.8	743.35	3	13.16		F17:96	2	1106	1130	Oxidation or Hydroxylation	P3:Oxidation or Hydroxylation:0.00;P7:Oxidation or Hydroxylation:26.02;P10:Oxidation or Hydroxylation:68.60
1-3	5-HCl-D	HCl	5 mL/g	Demineralization	Dialysis	2	2	4	Collagen I, alpha 1	Collagen alpha-1(I) chain OS=Gallus gallus GN=COL1A1 PE=1 SV=3	P02457|CO1A1_CHICK	L.QGPP(+15.99)GPPGAP(+15.99)GEQGPSGASGPAGPR.G	Y	39.19	2211.03	25	0.9	738.018	3	13.64		F18:114	2	1106	1130	Oxidation or Hydroxylation	P4:Oxidation or Hydroxylation:0.00;P10:Oxidation or Hydroxylation:41.59
1-3	5-HCl-D	HCl	5 mL/g	Demineralization	Dialysis	2	2	4	Collagen I, alpha 1	Collagen alpha-1(I) chain OS=Gallus gallus GN=COL1A1 PE=1 SV=3	P02457|CO1A1_CHICK	L.TGPIGPP(+15.99)GPAGAP(+15.99)GDKGEAGP(+15.99)PGPAGPTGAR.G	Y	39.39	2708.32	31	1.4	903.78	3	14.37		F18:131	1	755	785	Oxidation or Hydroxylation	P7:Oxidation or Hydroxylation:14.02;P13:Oxidation or Hydroxylation:22.45;P21:Oxidation or Hydroxylation:16.66
1-3	5-HCl-D	HCl	5 mL/g	Demineralization	Dialysis	2	2	4	Collagen I, alpha 1	Collagen alpha-1(I) chain OS=Gallus gallus GN=COL1A1 PE=1 SV=3	P02457|CO1A1_CHICK	L.TGPIGPP(+15.99)GPAGAPGD(+15.99)KGEAGPP(+15.99)GPAGPTGAR.G	Y	41.25	2708.32	31	1.4	903.78	3	14.75		F18:139	1	755	785	Oxidation or Hydroxylation	P7:Oxidation or Hydroxylation:36.05;D15:Oxidation or Hydroxylation:41.94;P22:Oxidation or Hydroxylation:0.00
1-3	5-HCl-D	HCl	5 mL/g	Demineralization	Dialysis	2	2	4	Collagen I, alpha 1	Collagen alpha-1(I) chain OS=Gallus gallus GN=COL1A1 PE=1 SV=3	P02457|CO1A1_CHICK	S.GNIGLP(+15.99)GP(+15.99)P(+15.99)GPAGK.Z	Y	20.63	1278.66	14	1.1	640.336	2	15.94		F18:170	1	879	892	Oxidation or Hydroxylation	P6:Oxidation or Hydroxylation:37.99;P8:Oxidation or Hydroxylation:26.52;P9:Oxidation or Hydroxylation:18.53
1-3	5-HCl-D	HCl	5 mL/g	Demineralization	Dialysis	2	2	4	Collagen I, alpha 1	Collagen alpha-1(I) chain OS=Gallus gallus GN=COL1A1 PE=1 SV=3	P02457|CO1A1_CHICK	R.GFP(+15.99)GADGIAGPKGPP(+15.99)GER.G	Y	46.47	1710.83	18	0.9	856.424	2	16.15		F18:177	3	483	500	Oxidation or Hydroxylation	P3:Oxidation or Hydroxylation:7.65;P15:Oxidation or Hydroxylation:0.00
1-3	5-HCl-D	HCl	5 mL/g	Demineralization	Dialysis	2	2	4	Collagen I, alpha 1	Collagen alpha-1(I) chain OS=Gallus gallus GN=COL1A1 PE=1 SV=3	P02457|CO1A1_CHICK	R.GFP(+15.99)GADGIAGPK(+15.99)GPPGER.G	Y	15.76	1710.83	18	0.7	571.285	3	16.24		F18:180	1	483	500	Oxidation or Hydroxylation	P3:Oxidation or Hydroxylation:17.01;K12:Oxidation or Hydroxylation:0.00
1-3	5-HCl-D	HCl	5 mL/g	Demineralization	Dialysis	2	2	4	Collagen I, alpha 1	Collagen alpha-1(I) chain OS=Gallus gallus GN=COL1A1 PE=1 SV=3	P02457|CO1A1_CHICK	R.GFP(+15.99)GADGIAGPKGPPGER(+15.99).G	Y	45.92	1710.83	18	1.1	856.424	2	16.42		F18:186	1	483	500	Oxidation or Hydroxylation	P3:Oxidation or Hydroxylation:8.14;R18:Oxidation or Hydroxylation:4.05
1-3	5-HCl-D	HCl	5 mL/g	Demineralization	Dialysis	2	2	4	Collagen I, alpha 1	Collagen alpha-1(I) chain OS=Gallus gallus GN=COL1A1 PE=1 SV=3	P02457|CO1A1_CHICK	K.GSPGAD(+15.99)GPIGAP(+15.99)GTP(+15.99)GPQGIAGQR.G	Y	36.59	2162.04	24	1.6	1082.03	2	16.69		F18:193	3	924	947	Oxidation or Hydroxylation	D6:Oxidation or Hydroxylation:0.00;P12:Oxidation or Hydroxylation:67.69;P15:Oxidation or Hydroxylation:28.86
1-3	5-HCl-D	HCl	5 mL/g	Demineralization	Dialysis	2	2	4	Collagen I, alpha 1	Collagen alpha-1(I) chain OS=Gallus gallus GN=COL1A1 PE=1 SV=3	P02457|CO1A1_CHICK	K.GSP(+15.99)GADGPIGAP(+15.99)GTP(+15.99)GPQGIAGQR.G	Y	38.26	2162.04	24	0.7	721.686	3	16.72		F18:194	1	924	947	Oxidation or Hydroxylation	P3:Oxidation or Hydroxylation:14.84;P12:Oxidation or Hydroxylation:41.96;P15:Oxidation or Hydroxylation:18.53
1-3	5-HCl-D	HCl	5 mL/g	Demineralization	Dialysis	2	2	4	Collagen I, alpha 1	Collagen alpha-1(I) chain OS=Gallus gallus GN=COL1A1 PE=1 SV=3	P02457|CO1A1_CHICK	R.GLTGPIGPP(+15.99)GPAGAP(+15.99)GDKGEAGPP(+15.99)GPAGPTGAR.G	Y	52.39	2878.42	33	1.6	960.482	3	16.99	425000000	F18:202	4	753	785	Oxidation or Hydroxylation	P9:Oxidation or Hydroxylation:88.98;P15:Oxidation or Hydroxylation:72.07;P24:Oxidation or Hydroxylation:77.07
1-3	5-HCl-D	HCl	5 mL/g	Demineralization	Dialysis	2	2	4	Collagen I, alpha 1	Collagen alpha-1(I) chain OS=Gallus gallus GN=COL1A1 PE=1 SV=3	P02457|CO1A1_CHICK	A.GKDGLNGLP(+15.99)GPIGP(+15.99)PGP(+15.99)R.G	Y	27.77	1745.91	18	0.9	873.961	2	17.1	31900000	F18:206	1	1140	1157	Oxidation or Hydroxylation	P9:Oxidation or Hydroxylation:27.16;P14:Oxidation or Hydroxylation:8.14;P17:Oxidation or Hydroxylation:0.00
1-3	5-HCl-D	HCl	5 mL/g	Demineralization	Dialysis	2	2	4	Collagen I, alpha 1	Collagen alpha-1(I) chain OS=Gallus gallus GN=COL1A1 PE=1 SV=3	P02457|CO1A1_CHICK	R.GLTGPIGP(+15.99)PGPAGAP(+15.99)GDKGEAGPP(+15.99)GPAGPTGAR.G	Y	42.56	2878.42	33	0.7	720.613	4	17.16	47500000	F18:208	1	753	785	Oxidation or Hydroxylation	P8:Oxidation or Hydroxylation:22.45;P15:Oxidation or Hydroxylation:67.69;P24:Oxidation or Hydroxylation:34.75
1-3	5-HCl-D	HCl	5 mL/g	Demineralization	Dialysis	2	2	4	Collagen I, alpha 1	Collagen alpha-1(I) chain OS=Gallus gallus GN=COL1A1 PE=1 SV=3	P02457|CO1A1_CHICK	R.GAP(+15.99)GDRGEP(+15.99)GPP(+15.99)GPAGF.A	Y	24.28	1582.7	17	0.5	792.358	2	17.18	60800000	F18:209	1	786	802	Oxidation or Hydroxylation	P3:Oxidation or Hydroxylation:0.00;P9:Oxidation or Hydroxylation:32.97;P12:Oxidation or Hydroxylation:27.96
1-3	5-HCl-D	HCl	5 mL/g	Demineralization	Dialysis	2	2	4	Collagen I, alpha 1	Collagen alpha-1(I) chain OS=Gallus gallus GN=COL1A1 PE=1 SV=3	P02457|CO1A1_CHICK	R.GAPGDR(+15.99)GEP(+15.99)GPP(+15.99)GPAGF.A	Y	17.4	1582.7	17	0.6	792.358	2	17.27	60800000	F18:212	1	786	802	Oxidation or Hydroxylation	R6:Oxidation or Hydroxylation:0.00;P9:Oxidation or Hydroxylation:33.81;P12:Oxidation or Hydroxylation:14.04
1-3	5-HCl-D	HCl	5 mL/g	Demineralization	Dialysis	2	2	4	Collagen I, alpha 1	Collagen alpha-1(I) chain OS=Gallus gallus GN=COL1A1 PE=1 SV=3	P02457|CO1A1_CHICK	R.GPP(+15.99)GPMGPP(+15.99)GLAGPP(+15.99)GEAGR.E	Y	49.72	1815.86	20	1.5	908.937	2	17.46		F18:218	4	984	1003	Oxidation or Hydroxylation	P3:Oxidation or Hydroxylation:12.28;P9:Oxidation or Hydroxylation:30.46;P15:Oxidation or Hydroxylation:12.35
1-3	5-HCl-D	HCl	5 mL/g	Demineralization	Dialysis	2	2	4	Collagen I, alpha 1	Collagen alpha-1(I) chain OS=Gallus gallus GN=COL1A1 PE=1 SV=3	P02457|CO1A1_CHICK	R.GFP(+15.99)GADGIAGPK.G	Y	37.32	1101.55	12	0.8	551.78	2	17.81		F18:229	3	483	494	Oxidation or Hydroxylation	P3:Oxidation or Hydroxylation:10.11
1-3	5-HCl-D	HCl	5 mL/g	Demineralization	Dialysis	2	2	4	Collagen I, alpha 1	Collagen alpha-1(I) chain OS=Gallus gallus GN=COL1A1 PE=1 SV=3	P02457|CO1A1_CHICK	R.GPP(+15.99)GPMGPPGLAGPP(+15.99)GEAGR.E	Y	48.34	1799.86	20	1.5	900.94	2	18.72		F18:259	2	984	1003	Oxidation or Hydroxylation	P3:Oxidation or Hydroxylation:11.06;P15:Oxidation or Hydroxylation:27.96
1-3	5-HCl-D	HCl	5 mL/g	Demineralization	Dialysis	2	2	4	Collagen I, alpha 1	Collagen alpha-1(I) chain OS=Gallus gallus GN=COL1A1 PE=1 SV=3	P02457|CO1A1_CHICK	A.GVAVPGPMGPAGPR.G	Y	34.5	1261.66	14	0.6	631.838	2	18.97		F18:266	2	163	176
1-3	5-HCl-D	HCl	5 mL/g	Demineralization	Dialysis	2	2	4	Collagen I, alpha 1	Collagen alpha-1(I) chain OS=Gallus gallus GN=COL1A1 PE=1 SV=3	P02457|CO1A1_CHICK	R.GPP(+15.99)GPMGPPGLAGPPGEAGR(+15.99).E	Y	36.37	1799.86	20	0.9	900.939	2	19.13		F18:271	1	984	1003	Oxidation or Hydroxylation	P3:Oxidation or Hydroxylation:14.02;R20:Oxidation or Hydroxylation:0.00
1-3	5-HCl-D	HCl	5 mL/g	Demineralization	Dialysis	2	2	4	Collagen I, alpha 1	Collagen alpha-1(I) chain OS=Gallus gallus GN=COL1A1 PE=1 SV=3	P02457|CO1A1_CHICK	K.SAGVAVPGPMGPAGPR.G	Y	25.65	1419.73	16	1	710.873	2	19.25		F18:274	2	161	176
1-3	5-HCl-D	HCl	5 mL/g	Demineralization	Dialysis	2	2	4	Collagen I, alpha 1	Collagen alpha-1(I) chain OS=Gallus gallus GN=COL1A1 PE=1 SV=3	P02457|CO1A1_CHICK	K.SAGVAVPGP(+15.99)MGPAGPR.G	Y	32.07	1435.72	16	1	718.87	2	19.3		F18:276	2	161	176	Oxidation or Hydroxylation	P9:Oxidation or Hydroxylation:18.00
1-3	5-HCl-D	HCl	5 mL/g	Demineralization	Dialysis	2	2	4	Collagen I, alpha 1	Collagen alpha-1(I) chain OS=Gallus gallus GN=COL1A1 PE=1 SV=3	P02457|CO1A1_CHICK	R.GLP(+15.99)GPP(+15.99)GAP(+15.99)GPQGF.Q	Y	37.67	1295.61	14	0.5	648.815	2	21.81		F18:346	4	177	190	Oxidation or Hydroxylation	P3:Oxidation or Hydroxylation:60.92;P6:Oxidation or Hydroxylation:26.02;P9:Oxidation or Hydroxylation:52.04
1-3	5-HCl-D	HCl	5 mL/g	Demineralization	Dialysis	2	2	4	Collagen I, alpha 1	Collagen alpha-1(I) chain OS=Gallus gallus GN=COL1A1 PE=1 SV=3	P02457|CO1A1_CHICK	K.SGEYWIDPNQGC(+57.02)NLDAIK.V	Y	32.31	2078.94	18	2	1040.48	2	26.33		F18:451	1	1260	1277	Carbamidomethylation	C12:Carbamidomethylation:1000.00
1-3	5-HCl-D	HCl	5 mL/g	Demineralization	Dialysis	2	2	4	Collagen I, alpha 1	Collagen alpha-1(I) chain OS=Gallus gallus GN=COL1A1 PE=1 SV=3	P02457|CO1A1_CHICK	F.GIDIGPVC(+57.02)FL	Y	17.73	1089.55	10	0.8	545.784	2	38.05		F18:639	1	1444	1453	Carbamidomethylation	C8:Carbamidomethylation:1000.00
1-3	5-HCl-D	HCl	5 mL/g	Demineralization	Dialysis	2	2	4	Collagen I, alpha 1	Collagen alpha-1(I) chain OS=Gallus gallus GN=COL1A1 PE=1 SV=3	P02457|CO1A1_CHICK	M.DVGAPDQEFGIDIGPVC(+57.02)FL	Y	26.05	2047.96	19	1.2	1024.99	2	40.71		F18:661	1	1435	1453	Carbamidomethylation	C17:Carbamidomethylation:1000.00
1-3	5-HCl-D	HCl	5 mL/g	Demineralization	Dialysis	1	1	1	Collagen I, alpha 2	Collagen alpha-2(I) chain OS=Gallus gallus GN=COL1A2 PE=4 SV=1	tr|F1P0H9|F1P0H9_CHICK	R.VGP(+15.99)P(+15.99)GPAGITGPP(+15.99)GPP(+15.99)GPAGKDGPR.G	Y	20.84	2266.13	25	1.2	756.386	3	15.48		F17:154	1	794	818	Oxidation or Hydroxylation	P3:Oxidation or Hydroxylation:38.16;P4:Oxidation or Hydroxylation:26.31;P13:Oxidation or Hydroxylation:14.02;P16:Oxidation or Hydroxylation:11.10
1-3	5-HCl-D	HCl	5 mL/g	Demineralization	Dialysis	1	1	1	Collagen I, alpha 2	Collagen alpha-2(I) chain OS=Gallus gallus GN=COL1A2 PE=4 SV=1	tr|F1P0H9|F1P0H9_CHICK	Q.GLP(+15.99)GLAGQHGDQGPPGN(+15.99)NGPAGPR.G	Y	28.36	2252.07	24	0.9	751.697	3	15.6		F17:158	1	1029	1052	Oxidation or Hydroxylation	P3:Oxidation or Hydroxylation:49.35;N17:Oxidation or Hydroxylation:7.32
1-3	5-HCl-D	HCl	5 mL/g	Demineralization	Dialysis	1	1	1	Collagen I, alpha 2	Collagen alpha-2(I) chain OS=Gallus gallus GN=COL1A2 PE=4 SV=1	tr|F1P0H9|F1P0H9_CHICK	R.VGP(+15.99)P(+15.99)GPAGITGPP(+15.99)GP(+15.99)P(+15.99)GPAGK.D	Y	21.87	1856.93	21	1.4	929.472	2	15.72		F17:161	1	794	814	Oxidation or Hydroxylation	P3:Oxidation or Hydroxylation:6.63;P4:Oxidation or Hydroxylation:8.22;P13:Oxidation or Hydroxylation:27.96;P15:Oxidation or Hydroxylation:6.63;P16:Oxidation or Hydroxylation:0.00
1-3	5-HCl-D	HCl	5 mL/g	Demineralization	Dialysis	1	1	1	Collagen I, alpha 2	Collagen alpha-2(I) chain OS=Gallus gallus GN=COL1A2 PE=4 SV=1	tr|F1P0H9|F1P0H9_CHICK	R.GLP(+15.99)GAIGAP(+15.99)GPAGGAGDR.G	Y	31.27	1521.75	18	0.5	761.885	2	15.79		F17:163	1	675	692	Oxidation or Hydroxylation	P3:Oxidation or Hydroxylation:97.31;P9:Oxidation or Hydroxylation:14.04
1-3	5-HCl-D	HCl	5 mL/g	Demineralization	Dialysis	1	1	1	Collagen I, alpha 2	Collagen alpha-2(I) chain OS=Gallus gallus GN=COL1A2 PE=4 SV=1	tr|F1P0H9|F1P0H9_CHICK	R.VGP(+15.99)P(+15.99)GPAGITGPP(+15.99)GPP(+15.99)GPAGK.D	Y	33.31	1840.93	21	1.4	921.475	2	16.12		F17:172	4	794	814	Oxidation or Hydroxylation	P3:Oxidation or Hydroxylation:32.97;P4:Oxidation or Hydroxylation:22.85;P13:Oxidation or Hydroxylation:30.46;P16:Oxidation or Hydroxylation:30.46
1-3	5-HCl-D	HCl	5 mL/g	Demineralization	Dialysis	1	1	1	Collagen I, alpha 2	Collagen alpha-2(I) chain OS=Gallus gallus GN=COL1A2 PE=4 SV=1	tr|F1P0H9|F1P0H9_CHICK	R.GLP(+15.99)GAIGAP(+15.99)GPAGGAGDRGEGGPAGPAGPAGAR.G	Y	37.31	2724.33	33	1.2	909.119	3	16.38		F17:181	5	675	707	Oxidation or Hydroxylation	P3:Oxidation or Hydroxylation:150.63;P9:Oxidation or Hydroxylation:26.31
1-3	5-HCl-D	HCl	5 mL/g	Demineralization	Dialysis	1	1	1	Collagen I, alpha 2	Collagen alpha-2(I) chain OS=Gallus gallus GN=COL1A2 PE=4 SV=1	tr|F1P0H9|F1P0H9_CHICK	R.GLP(+15.99)GAIGAPGP(+15.99)AGGAGDRGEGGPAGPAGPAGAR.G	Y	39.93	2724.33	33	0	682.091	4	16.48		F17:185	2	675	707	Oxidation or Hydroxylation	P3:Oxidation or Hydroxylation:22.09;P11:Oxidation or Hydroxylation:0.00
1-3	5-HCl-D	HCl	5 mL/g	Demineralization	Dialysis	1	1	1	Collagen I, alpha 2	Collagen alpha-2(I) chain OS=Gallus gallus GN=COL1A2 PE=4 SV=1	tr|F1P0H9|F1P0H9_CHICK	A.GATGEP(+15.99)GPLGVSGPP(+15.99)GAR.G	Y	26.72	1607.79	18	1.1	804.903	2	16.65		F17:190	1	888	905	Oxidation or Hydroxylation	P6:Oxidation or Hydroxylation:0.00;P15:Oxidation or Hydroxylation:0.00
1-3	5-HCl-D	HCl	5 mL/g	Demineralization	Dialysis	1	1	1	Collagen I, alpha 2	Collagen alpha-2(I) chain OS=Gallus gallus GN=COL1A2 PE=4 SV=1	tr|F1P0H9|F1P0H9_CHICK	R.GLP(+15.99)GAIGAP(+15.99)GPAGGAGDRGEGGPAGPAGPA.G	Y	25.53	2440.17	30	1.3	1221.1	2	18.42		F17:249	1	675	704	Oxidation or Hydroxylation	P3:Oxidation or Hydroxylation:54.92;P9:Oxidation or Hydroxylation:14.04
1-3	5-HCl-D	HCl	5 mL/g	Demineralization	Dialysis	1	1	1	Collagen I, alpha 2	Collagen alpha-2(I) chain OS=Gallus gallus GN=COL1A2 PE=4 SV=1	tr|F1P0H9|F1P0H9_CHICK	K.GPKGETGPTGAIGPIGAS.G	Y	35.1	1565.8	18	1.2	783.911	2	18.69		F17:257	1	744	761
1-3	5-HCl-D	HCl	5 mL/g	Demineralization	Dialysis	1	1	1	Collagen I, alpha 2	Collagen alpha-2(I) chain OS=Gallus gallus GN=COL1A2 PE=4 SV=1	tr|F1P0H9|F1P0H9_CHICK	R.TGEQGIAGPP(+15.99)GFAGEKGPSGEAGAA.G	Y	31.83	2228.03	25	2.8	1115.03	2	18.99		F17:267	2	830	854	Oxidation or Hydroxylation	P10:Oxidation or Hydroxylation:24.44
1-3	5-HCl-D	HCl	5 mL/g	Demineralization	Dialysis	1	1	1	Collagen I, alpha 2	Collagen alpha-2(I) chain OS=Gallus gallus GN=COL1A2 PE=4 SV=1	tr|F1P0H9|F1P0H9_CHICK	R.VGPIGPAGNRGEP(+15.99)GNIGFP(+15.99)GPK.G	Y	34.82	2119.08	22	0.9	707.368	3	19.16		F17:271	2	476	497	Oxidation or Hydroxylation	P13:Oxidation or Hydroxylation:11.10;P19:Oxidation or Hydroxylation:14.02
1-3	5-HCl-D	HCl	5 mL/g	Demineralization	Dialysis	1	1	1	Collagen I, alpha 2	Collagen alpha-2(I) chain OS=Gallus gallus GN=COL1A2 PE=4 SV=1	tr|F1P0H9|F1P0H9_CHICK	R.VGPIGPAGNRGEP(+15.99)GNIGFPGP(+15.99)K.G	Y	35.53	2119.08	22	0.7	1060.55	2	19.34		F17:277	2	476	497	Oxidation or Hydroxylation	P13:Oxidation or Hydroxylation:14.63;P21:Oxidation or Hydroxylation:0.00
1-3	5-HCl-D	HCl	5 mL/g	Demineralization	Dialysis	1	1	1	Collagen I, alpha 2	Collagen alpha-2(I) chain OS=Gallus gallus GN=COL1A2 PE=4 SV=1	tr|F1P0H9|F1P0H9_CHICK	K.GPK(+15.99)GETGPTGAIGPIGA.S	Y	38.78	1494.77	17	1.3	748.392	2	19.55		F17:282	2	744	760	Oxidation or Hydroxylation	K3:Oxidation or Hydroxylation:0.00
1-3	5-HCl-D	HCl	5 mL/g	Demineralization	Dialysis	1	1	1	Collagen I, alpha 2	Collagen alpha-2(I) chain OS=Gallus gallus GN=COL1A2 PE=4 SV=1	tr|F1P0H9|F1P0H9_CHICK	R.GLPGESGAVGPAGPIGSR.G	Y	44.58	1577.82	18	0.8	789.916	2	19.6		F17:284	3	591	608
1-3	5-HCl-D	HCl	5 mL/g	Demineralization	Dialysis	1	1	1	Collagen I, alpha 2	Collagen alpha-2(I) chain OS=Gallus gallus GN=COL1A2 PE=4 SV=1	tr|F1P0H9|F1P0H9_CHICK	K.GPKGETGPTGAIGPIGA.S	Y	36.7	1478.77	17	1.6	740.395	2	19.63		F17:285	2	744	760
1-3	5-HCl-D	HCl	5 mL/g	Demineralization	Dialysis	1	1	1	Collagen I, alpha 2	Collagen alpha-2(I) chain OS=Gallus gallus GN=COL1A2 PE=4 SV=1	tr|F1P0H9|F1P0H9_CHICK	R.GSDGSAGPTGPAGPIGAAGPP(+15.99)GF(+15.99)PGAPGAK(+15.99).G	Y	36.27	2520.19	30	0.5	841.07	3	20.71		F17:317	1	234	263	Oxidation or Hydroxylation	P21:Oxidation or Hydroxylation:0.00;F23:Oxidation or Hydroxylation:83.11;K30:Oxidation or Hydroxylation:93.52
1-3	5-HCl-D	HCl	5 mL/g	Demineralization	Dialysis	1	1	1	Collagen I, alpha 2	Collagen alpha-2(I) chain OS=Gallus gallus GN=COL1A2 PE=4 SV=1	tr|F1P0H9|F1P0H9_CHICK	R.GSDGSAGPTGPAGPIGAAGPP(+15.99)GFP(+15.99)GAP(+15.99)GAK.G	Y	44.81	2520.19	30	1	1261.1	2	20.8		F17:320	1	234	263	Oxidation or Hydroxylation	P21:Oxidation or Hydroxylation:109.53;P24:Oxidation or Hydroxylation:142.63;P27:Oxidation or Hydroxylation:137.27
1-3	5-HCl-D	HCl	5 mL/g	Demineralization	Dialysis	1	1	1	Collagen I, alpha 2	Collagen alpha-2(I) chain OS=Gallus gallus GN=COL1A2 PE=4 SV=1	tr|F1P0H9|F1P0H9_CHICK	K.GPKGETGPTGAIGPIGASGPP(+15.99)GPVGAA.G	Y	25.95	2285.16	27	1.1	1143.59	2	21.35		F17:335	3	744	770	Oxidation or Hydroxylation	P21:Oxidation or Hydroxylation:7.32
1-3	5-HCl-D	HCl	5 mL/g	Demineralization	Dialysis	1	1	1	Collagen I, alpha 2	Collagen alpha-2(I) chain OS=Gallus gallus GN=COL1A2 PE=4 SV=1	tr|F1P0H9|F1P0H9_CHICK	R.GSDGSAGPTGPAGPIGAAGPP(+15.99)GFPGAP(+15.99)GAK.G	Y	36.9	2504.19	30	0.9	835.739	3	21.71		F17:346	1	234	263	Oxidation or Hydroxylation	P21:Oxidation or Hydroxylation:22.34;P27:Oxidation or Hydroxylation:61.69
1-3	5-HCl-D	HCl	5 mL/g	Demineralization	Dialysis	1	1	1	Collagen I, alpha 2	Collagen alpha-2(I) chain OS=Gallus gallus GN=COL1A2 PE=4 SV=1	tr|F1P0H9|F1P0H9_CHICK	K.GETGPTGAIGPIGASGPP(+15.99)GPVGAAGPAGPR.G	Y	36.63	2538.28	30	0.8	847.102	3	21.74		F17:347	1	747	776	Oxidation or Hydroxylation	P18:Oxidation or Hydroxylation:48.34
1-3	5-HCl-D	HCl	5 mL/g	Demineralization	Dialysis	1	1	1	Collagen I, alpha 2	Collagen alpha-2(I) chain OS=Gallus gallus GN=COL1A2 PE=4 SV=1	tr|F1P0H9|F1P0H9_CHICK	K.GHNGLQGLP(+15.99)GLA.G	Y	23	1148.59	12	1.5	575.305	2	22.44		F17:368	1	1023	1034	Oxidation or Hydroxylation	P9:Oxidation or Hydroxylation:77.93
1-3	5-HCl-D	HCl	5 mL/g	Demineralization	Dialysis	1	1	1	Collagen I, alpha 2	Collagen alpha-2(I) chain OS=Gallus gallus GN=COL1A2 PE=4 SV=1	tr|F1P0H9|F1P0H9_CHICK	R.GFP(+15.99)GTP(+15.99)GLPGFK(+15.99).G	Y	33.17	1221.6	12	0.5	611.809	2	22.51		F17:370	2	165	176	Oxidation or Hydroxylation	P3:Oxidation or Hydroxylation:10.11;P6:Oxidation or Hydroxylation:40.63;K12:Oxidation or Hydroxylation:0.00
1-3	5-HCl-D	HCl	5 mL/g	Demineralization	Dialysis	1	1	1	Collagen I, alpha 2	Collagen alpha-2(I) chain OS=Gallus gallus GN=COL1A2 PE=4 SV=1	tr|F1P0H9|F1P0H9_CHICK	L.DIGGADQEFGLH.I	Y	15.03	1257.56	12	0.8	629.789	2	22.56		F17:372	1	1345	1356
1-3	5-HCl-D	HCl	5 mL/g	Demineralization	Dialysis	1	1	1	Collagen I, alpha 2	Collagen alpha-2(I) chain OS=Gallus gallus GN=COL1A2 PE=4 SV=1	tr|F1P0H9|F1P0H9_CHICK	K.GETGPTGAIGPIGA.S	Y	33.31	1196.6	14	1.5	599.31	2	22.9		F17:380	1	747	760
1-3	5-HCl-D	HCl	5 mL/g	Demineralization	Dialysis	1	1	1	Collagen I, alpha 2	Collagen alpha-2(I) chain OS=Gallus gallus GN=COL1A2 PE=4 SV=1	tr|F1P0H9|F1P0H9_CHICK	R.GDPGPVGPVGPAGAF.G	Y	35.47	1293.64	15	0.8	647.825	2	26.9		F17:473	1	978	992
1-3	5-HCl-D	HCl	5 mL/g	Demineralization	Dialysis	2	1	1	Collagen I, alpha 2	Collagen alpha-2(I) chain OS=Gallus gallus GN=COL1A2 PE=4 SV=1	tr|F1P0H9|F1P0H9_CHICK	R.GPSGP(+15.99)PGPDGNKGEP(+15.99)GNVGPAGAP(+15.99)GPAGPGGIP(+15.99)GER.G	Y	36.74	3191.49	36	1.2	1064.84	3	15.44		F18:158	1	609	644	Oxidation or Hydroxylation	P5:Oxidation or Hydroxylation:12.33;P15:Oxidation or Hydroxylation:52.86;P24:Oxidation or Hydroxylation:44.44;P33:Oxidation or Hydroxylation:44.44
1-3	5-HCl-D	HCl	5 mL/g	Demineralization	Dialysis	2	1	1	Collagen I, alpha 2	Collagen alpha-2(I) chain OS=Gallus gallus GN=COL1A2 PE=4 SV=1	tr|F1P0H9|F1P0H9_CHICK	R.VGN(sub P)P(+15.99)GPAGITGPP(+15.99)GPP(+15.99)GPAGK.D	Y	24.07	1841.93	21	5	921.976	2	16.27		F18:181	1	794	814	Oxidation or Hydroxylation; Mutation	P4:Oxidation or Hydroxylation:8.14;P13:Oxidation or Hydroxylation:8.14;P16:Oxidation or Hydroxylation:17.01
1-3	5-HCl-D	HCl	5 mL/g	Demineralization	Dialysis	2	1	1	Collagen I, alpha 2	Collagen alpha-2(I) chain OS=Gallus gallus GN=COL1A2 PE=4 SV=1	tr|F1P0H9|F1P0H9_CHICK	A.GATGEP(+15.99)GPLGVSGPPGAR(+15.99).G	Y	33.11	1607.79	18	1	804.903	2	16.46		F18:187	1	888	905	Oxidation or Hydroxylation	P6:Oxidation or Hydroxylation:0.00;R18:Oxidation or Hydroxylation:0.00
1-3	5-HCl-D	HCl	5 mL/g	Demineralization	Dialysis	2	1	1	Collagen I, alpha 2	Collagen alpha-2(I) chain OS=Gallus gallus GN=COL1A2 PE=4 SV=1	tr|F1P0H9|F1P0H9_CHICK	R.GLP(+15.99)GAIGAPGPAGGAGD(+15.99)RGEGGPAGPAGPAGAR.G	Y	27.05	2724.33	33	1.3	1363.18	2	16.54		F18:190	1	675	707	Oxidation or Hydroxylation	P3:Oxidation or Hydroxylation:9.45;D17:Oxidation or Hydroxylation:2.52
1-3	5-HCl-D	HCl	5 mL/g	Demineralization	Dialysis	2	1	1	Collagen I, alpha 2	Collagen alpha-2(I) chain OS=Gallus gallus GN=COL1A2 PE=4 SV=1	tr|F1P0H9|F1P0H9_CHICK	K.GEIGPAGNVGPTGPAGPR.G	Y	53.5	1602.81	18	1	802.414	2	16.86		F18:199	1	264	281
1-3	5-HCl-D	HCl	5 mL/g	Demineralization	Dialysis	2	1	1	Collagen I, alpha 2	Collagen alpha-2(I) chain OS=Gallus gallus GN=COL1A2 PE=4 SV=1	tr|F1P0H9|F1P0H9_CHICK	K.EGPVGFP(+15.99)GADGR.V	Y	34.13	1173.54	12	0.5	587.778	2	17.02	41000000	F18:203	2	464	475	Oxidation or Hydroxylation	P7:Oxidation or Hydroxylation:12.28
1-3	5-HCl-D	HCl	5 mL/g	Demineralization	Dialysis	2	1	1	Collagen I, alpha 2	Collagen alpha-2(I) chain OS=Gallus gallus GN=COL1A2 PE=4 SV=1	tr|F1P0H9|F1P0H9_CHICK	R.TGEQGIAGPP(+15.99)GFAGEK.G	Y	39.01	1530.73	16	1.2	766.374	2	17.6		F18:223	2	830	845	Oxidation or Hydroxylation	P10:Oxidation or Hydroxylation:13.67
1-3	5-HCl-D	HCl	5 mL/g	Demineralization	Dialysis	2	1	1	Collagen I, alpha 2	Collagen alpha-2(I) chain OS=Gallus gallus GN=COL1A2 PE=4 SV=1	tr|F1P0H9|F1P0H9_CHICK	R.GLP(+15.99)GESGAVGPAGPIGSR.G	Y	50.31	1593.81	18	1.4	797.914	2	18.13		F18:238	7	591	608	Oxidation or Hydroxylation	P3:Oxidation or Hydroxylation:115.01
1-3	5-HCl-D	HCl	5 mL/g	Demineralization	Dialysis	2	1	1	Collagen I, alpha 2	Collagen alpha-2(I) chain OS=Gallus gallus GN=COL1A2 PE=4 SV=1	tr|F1P0H9|F1P0H9_CHICK	K.GETGPAGPP(+15.99)GFQGLP(+15.99)GPSGPAGEAGKPGER(+15.99).G	Y	56.83	2776.31	30	1.4	926.444	3	18.52		F18:252	2	543	572	Oxidation or Hydroxylation	P9:Oxidation or Hydroxylation:67.69;P15:Oxidation or Hydroxylation:81.27;R30:Oxidation or Hydroxylation:61.26
1-3	5-HCl-D	HCl	5 mL/g	Demineralization	Dialysis	2	1	1	Collagen I, alpha 2	Collagen alpha-2(I) chain OS=Gallus gallus GN=COL1A2 PE=4 SV=1	tr|F1P0H9|F1P0H9_CHICK	K.GPK(+15.99)GETGPTGAIGPIGAS.G	Y	35.34	1581.8	18	0.9	791.908	2	18.54		F18:253	1	744	761	Oxidation or Hydroxylation	K3:Oxidation or Hydroxylation:0.00
1-3	5-HCl-D	HCl	5 mL/g	Demineralization	Dialysis	2	1	1	Collagen I, alpha 2	Collagen alpha-2(I) chain OS=Gallus gallus GN=COL1A2 PE=4 SV=1	tr|F1P0H9|F1P0H9_CHICK	K.GETGPAGPP(+15.99)GFQGLP(+15.99)GPSGPAGEAGKP(+15.99)GER.G	Y	53.16	2776.31	30	0.9	926.443	3	18.63		F18:256	2	543	572	Oxidation or Hydroxylation	P9:Oxidation or Hydroxylation:76.73;P15:Oxidation or Hydroxylation:58.52;P27:Oxidation or Hydroxylation:74.64
1-3	5-HCl-D	HCl	5 mL/g	Demineralization	Dialysis	2	1	1	Collagen I, alpha 2	Collagen alpha-2(I) chain OS=Gallus gallus GN=COL1A2 PE=4 SV=1	tr|F1P0H9|F1P0H9_CHICK	R.GDPGPVGPVGPA.G	Y	28.62	1018.51	12	1.8	1019.52	1	18.85		F18:263	1	978	989
1-3	5-HCl-D	HCl	5 mL/g	Demineralization	Dialysis	2	1	1	Collagen I, alpha 2	Collagen alpha-2(I) chain OS=Gallus gallus GN=COL1A2 PE=4 SV=1	tr|F1P0H9|F1P0H9_CHICK	K.GAAGLP(+15.99)GVAGAP(+15.99)GLPGPR(+15.99).G	Y	39.31	1561.82	18	1.1	781.919	2	19.6		F18:286	3	309	326	Oxidation or Hydroxylation	P6:Oxidation or Hydroxylation:123.34;P12:Oxidation or Hydroxylation:32.97;R18:Oxidation or Hydroxylation:0.00
1-3	5-HCl-D	HCl	5 mL/g	Demineralization	Dialysis	2	1	1	Collagen I, alpha 2	Collagen alpha-2(I) chain OS=Gallus gallus GN=COL1A2 PE=4 SV=1	tr|F1P0H9|F1P0H9_CHICK	R.GEIGLP(+15.99)GSSGPVGP(+15.99)PGNP(+15.99)GANGLPGAK(+15.99).G	Y	31.66	2417.18	27	0.2	806.735	3	19.69		F18:289	1	282	308	Oxidation or Hydroxylation	P6:Oxidation or Hydroxylation:79.02;P14:Oxidation or Hydroxylation:0.00;P18:Oxidation or Hydroxylation:22.45;K27:Oxidation or Hydroxylation:0.00
1-3	5-HCl-D	HCl	5 mL/g	Demineralization	Dialysis	2	1	1	Collagen I, alpha 2	Collagen alpha-2(I) chain OS=Gallus gallus GN=COL1A2 PE=4 SV=1	tr|F1P0H9|F1P0H9_CHICK	R.GSDGSAGPTGPAGPIGAAGPP(+15.99)GF(+15.99)PGAP(+15.99)GAK.G	Y	25.98	2520.19	30	0.4	841.07	3	20.82		F18:321	1	234	263	Oxidation or Hydroxylation	P21:Oxidation or Hydroxylation:0.00;F23:Oxidation or Hydroxylation:0.00;P27:Oxidation or Hydroxylation:0.00
1-3	5-HCl-D	HCl	5 mL/g	Demineralization	Dialysis	2	1	1	Collagen I, alpha 2	Collagen alpha-2(I) chain OS=Gallus gallus GN=COL1A2 PE=4 SV=1	tr|F1P0H9|F1P0H9_CHICK	K.GP(+15.99)KGETGPTGAIGPIGASGPP(+15.99)GPVGAA.G	Y	31.19	2301.16	27	0.7	1151.59	2	21.11		F18:330	2	744	770	Oxidation or Hydroxylation	P2:Oxidation or Hydroxylation:0.00;P21:Oxidation or Hydroxylation:9.34
1-3	5-HCl-D	HCl	5 mL/g	Demineralization	Dialysis	2	1	1	Collagen I, alpha 2	Collagen alpha-2(I) chain OS=Gallus gallus GN=COL1A2 PE=4 SV=1	tr|F1P0H9|F1P0H9_CHICK	K.GP(+15.99)KGETGPTGAIGPIGASGP(+15.99)PGPVGAA.G	Y	29.01	2301.16	27	1.7	768.062	3	21.17		F18:332	3	744	770	Oxidation or Hydroxylation	P2:Oxidation or Hydroxylation:0.00;P20:Oxidation or Hydroxylation:0.00
1-3	5-HCl-D	HCl	5 mL/g	Demineralization	Dialysis	2	1	1	Collagen I, alpha 2	Collagen alpha-2(I) chain OS=Gallus gallus GN=COL1A2 PE=4 SV=1	tr|F1P0H9|F1P0H9_CHICK	K.GPKGETGPTGAIGPIGASGP(+15.99)PGPVGAA.G	Y	24.58	2285.16	27	0.7	762.73	3	21.2		F18:333	2	744	770	Oxidation or Hydroxylation	P20:Oxidation or Hydroxylation:0.00
1-3	5-HCl-D	HCl	5 mL/g	Demineralization	Dialysis	2	1	1	Collagen I, alpha 2	Collagen alpha-2(I) chain OS=Gallus gallus GN=COL1A2 PE=4 SV=1	tr|F1P0H9|F1P0H9_CHICK	K.GP(+15.99)KGETGPTGAIGPIGASGPPGP(+15.99)VGAA.G	Y	17.37	2301.16	27	1.3	1151.59	2	21.5		F18:341	1	744	770	Oxidation or Hydroxylation	P2:Oxidation or Hydroxylation:0.00;P23:Oxidation or Hydroxylation:0.00
1-3	5-HCl-D	HCl	5 mL/g	Demineralization	Dialysis	2	1	1	Collagen I, alpha 2	Collagen alpha-2(I) chain OS=Gallus gallus GN=COL1A2 PE=4 SV=1	tr|F1P0H9|F1P0H9_CHICK	R.GDP(+15.99)GPVGPVGPAGAFGPR.G	Y	48.67	1619.81	18	0.7	810.911	2	21.86		F18:348	4	978	995	Oxidation or Hydroxylation	P3:Oxidation or Hydroxylation:11.06
1-3	5-HCl-D	HCl	5 mL/g	Demineralization	Dialysis	2	1	1	Collagen I, alpha 2	Collagen alpha-2(I) chain OS=Gallus gallus GN=COL1A2 PE=4 SV=1	tr|F1P0H9|F1P0H9_CHICK	R.GFP(+15.99)GTP(+15.99)GLP(+15.99)GFK.G	Y	35.45	1221.6	12	0.4	611.809	2	22.39		F18:364	2	165	176	Oxidation or Hydroxylation	P3:Oxidation or Hydroxylation:12.28;P6:Oxidation or Hydroxylation:38.32;P9:Oxidation or Hydroxylation:0.00
1-3	5-HCl-D	HCl	5 mL/g	Demineralization	Dialysis	2	1	1	Collagen I, alpha 2	Collagen alpha-2(I) chain OS=Gallus gallus GN=COL1A2 PE=4 SV=1	tr|F1P0H9|F1P0H9_CHICK	R.GDPGPVGPVGPAGAFGPR.G	Y	51.62	1603.81	18	1.3	802.914	2	22.69		F18:373	4	978	995
1-3	5-HCl-D	HCl	5 mL/g	Demineralization	Dialysis	2	1	1	Collagen I, alpha 2	Collagen alpha-2(I) chain OS=Gallus gallus GN=COL1A2 PE=4 SV=1	tr|F1P0H9|F1P0H9_CHICK	K.GPSGEAGAAGPP(+15.99)GTP(+15.99)GPQGIL.G	Y	31.24	1818.87	21	1.6	910.446	2	23.14		F18:384	2	846	866	Oxidation or Hydroxylation	P12:Oxidation or Hydroxylation:30.46;P15:Oxidation or Hydroxylation:9.40
1-3	5-HCl-D	HCl	5 mL/g	Demineralization	Dialysis	2	1	1	Collagen I, alpha 2	Collagen alpha-2(I) chain OS=Gallus gallus GN=COL1A2 PE=4 SV=1	tr|F1P0H9|F1P0H9_CHICK	K.GETGPTGAIGPIGASGP(+15.99)PGPVGAA.G	Y	26.24	2003	24	1.5	1002.51	2	23.64		F18:393	2	747	770	Oxidation or Hydroxylation	P17:Oxidation or Hydroxylation:0.00
1-3	5-HCl-D	HCl	5 mL/g	Demineralization	Dialysis	2	1	1	Collagen I, alpha 2	Collagen alpha-2(I) chain OS=Gallus gallus GN=COL1A2 PE=4 SV=1	tr|F1P0H9|F1P0H9_CHICK	K.GETGPTGAIGPIGASGPP(+15.99)GPVGAA.G	Y	30.9	2003	24	1	1002.51	2	24.15		F18:404	2	747	770	Oxidation or Hydroxylation	P18:Oxidation or Hydroxylation:0.00
1-3	5-HCl-D	HCl	5 mL/g	Demineralization	Dialysis	2	1	1	Collagen I, alpha 2	Collagen alpha-2(I) chain OS=Gallus gallus GN=COL1A2 PE=4 SV=1	tr|F1P0H9|F1P0H9_CHICK	R.TGEQGIAGPPGF(+15.99)AGEKGPSGEAGAAGPP(+15.99)GTP(+15.99)GPQGIL.G	Y	26.05	3331.6	37	0.8	1111.54	3	24.41		F18:410	4	830	866	Oxidation or Hydroxylation	F12:Oxidation or Hydroxylation:0.00;P28:Oxidation or Hydroxylation:26.93;P31:Oxidation or Hydroxylation:49.79
1-3	5-HCl-D	HCl	5 mL/g	Demineralization	Dialysis	2	1	1	Collagen I, alpha 2	Collagen alpha-2(I) chain OS=Gallus gallus GN=COL1A2 PE=4 SV=1	tr|F1P0H9|F1P0H9_CHICK	R.GDP(+15.99)GPVGPVGPAGAF.G	Y	40.13	1309.63	15	0.8	655.823	2	26.21		F18:448	2	978	992	Oxidation or Hydroxylation	P3:Oxidation or Hydroxylation:0.00
1-3	5-HCl-D	HCl	5 mL/g	Demineralization	Dialysis	2	1	1	Collagen I, alpha 2	Collagen alpha-2(I) chain OS=Gallus gallus GN=COL1A2 PE=4 SV=1	tr|F1P0H9|F1P0H9_CHICK	R.LPILDIAPL.D	Y	20.46	963.6	9	0.1	482.808	2	37.67		F18:635	1	1336	1344
1-3	5-HCl-D	HCl	5 mL/g	Demineralization	Dialysis	1	4	67	Collagen II, alpha 1	Collagen alpha-1(II) chain (Fragment) OS=Gallus gallus GN=COL2A1 PE=4 SV=2	tr|H9L2B7|H9L2B7_CHICK	R.GLTGPIGP(+15.99)P(+15.99)GPAGPNGQ(sub E)KGESGPPGPSGAAGAR.G	Y	28.5	2894.43	33	-2	965.814	3	16.74		F17:193	1	607	639	Oxidation or Hydroxylation; Mutation	P8:Oxidation or Hydroxylation:28.36;P9:Oxidation or Hydroxylation:18.53
1-3	5-HCl-D	HCl	5 mL/g	Demineralization	Dialysis	1	4	67	Collagen II, alpha 1	Collagen alpha-1(II) chain (Fragment) OS=Gallus gallus GN=COL2A1 PE=4 SV=2	tr|H9L2B7|H9L2B7_CHICK	R.GFP(+15.99)GLP(+15.99)GPSGEPGK(+15.99).Q	N	25.24	1343.64	14	0.9	672.826	2	18.85		F17:262	1	814	827	Oxidation or Hydroxylation	P3:Oxidation or Hydroxylation:14.02;P6:Oxidation or Hydroxylation:45.01;K14:Oxidation or Hydroxylation:0.00
1-3	5-HCl-D	HCl	5 mL/g	Demineralization	Dialysis	1	4	67	Collagen II, alpha 1	Collagen alpha-1(II) chain (Fragment) OS=Gallus gallus GN=COL2A1 PE=4 SV=2	tr|H9L2B7|H9L2B7_CHICK	R.GFPGLP(+15.99)GPSGEPGK(+15.99).Q	N	29.56	1327.64	14	0.6	664.828	2	20.19		F17:302	1	814	827	Oxidation or Hydroxylation	P6:Oxidation or Hydroxylation:28.36;K14:Oxidation or Hydroxylation:9.40
1-3	5-HCl-D	HCl	5 mL/g	Demineralization	Dialysis	1	4	67	Collagen II, alpha 1	Collagen alpha-1(II) chain (Fragment) OS=Gallus gallus GN=COL2A1 PE=4 SV=2	tr|H9L2B7|H9L2B7_CHICK	D.IGPVC(+57.02)FL	N	27.06	804.42	7	1.7	805.429	1	33.37		F17:595	1	1302	1308	Carbamidomethylation	C5:Carbamidomethylation:1000.00
1-3	5-HCl-D	HCl	5 mL/g	Demineralization	Dialysis	2	4	67	Collagen II, alpha 1	Collagen alpha-1(II) chain (Fragment) OS=Gallus gallus GN=COL2A1 PE=4 SV=2	tr|H9L2B7|H9L2B7_CHICK	R.GFP(+15.99)GLP(+15.99)GPSGEP(+15.99)GK.Q	N	28.67	1343.64	14	0.8	672.826	2	18.57		F18:254	3	814	827	Oxidation or Hydroxylation	P3:Oxidation or Hydroxylation:17.01;P6:Oxidation or Hydroxylation:45.01;P12:Oxidation or Hydroxylation:5.03
1-3	5-HCl-D	HCl	5 mL/g	Demineralization	Dialysis	2	4	67	Collagen II, alpha 1	Collagen alpha-1(II) chain (Fragment) OS=Gallus gallus GN=COL2A1 PE=4 SV=2	tr|H9L2B7|H9L2B7_CHICK	R.GFP(+15.99)GLP(+15.99)GPSGEPGK.Q	N	36.76	1327.64	14	0.6	664.828	2	19.33		F18:277	4	814	827	Oxidation or Hydroxylation	P3:Oxidation or Hydroxylation:14.02;P6:Oxidation or Hydroxylation:45.01
1-3	5-HCl-D	HCl	5 mL/g	Demineralization	Dialysis	2	4	67	Collagen II, alpha 1	Collagen alpha-1(II) chain (Fragment) OS=Gallus gallus GN=COL2A1 PE=4 SV=2	tr|H9L2B7|H9L2B7_CHICK	R.GFPGLP(+15.99)GPSGEP(+15.99)GK.Q	N	31.14	1327.64	14	1.3	664.828	2	20.22		F18:305	1	814	827	Oxidation or Hydroxylation	P6:Oxidation or Hydroxylation:47.09;P12:Oxidation or Hydroxylation:5.99
1-3	5-HCl-D	HCl	5 mL/g	Demineralization	Dialysis	1	6	275	Collagen V, alpha 2	Uncharacterized protein OS=Gallus gallus GN=COL5A2 PE=4 SV=2	tr|F1P563|F1P563_CHICK	R.LPIIDIAPVDVG.S	Y	30.45	1220.7	12	0.9	611.359	2	33.81		F17:605	2	462	473
1-3	5-HCl-D	HCl	5 mL/g	Demineralization	Dialysis	1	6	275	Collagen V, alpha 2	Uncharacterized protein OS=Gallus gallus GN=COL5A2 PE=4 SV=2	tr|F1P563|F1P563_CHICK	R.LPIIDIAPVDVGSTDQEFGIE.I	Y	27.58	2227.13	21	1.8	1114.57	2	36.13		F17:640	2	462	482
1-3	5-HCl-D	HCl	5 mL/g	Demineralization	Dialysis	2	11	43	Collagen IX, alpha 1	Alpha-1 type XI collagen (Fragment) OS=Gallus gallus PE=2 SV=1	tr|Q90796|Q90796_CHICK	F.GFEVGPVC(+57.02)FLG	Y	29.42	1180.56	11	1.1	591.287	2	35.68		F18:609	2	878	888	Carbamidomethylation	C8:Carbamidomethylation:1000.00
1-3	5-HCl-D	HCl	5 mL/g	Demineralization	Dialysis	1	9	10	Decorin	Decorin OS=Gallus gallus GN=DCN PE=1 SV=1	P28675|PGS2_CHICK	K.DLPPDTTLLDLQ.N	Y	22.95	1339.69	12	0.7	670.851	2	31.56		F17:568	2	76	87
1-3	5-HCl-D	HCl	5 mL/g	Demineralization	Dialysis	2	9	10	Decorin	Decorin OS=Gallus gallus GN=DCN PE=1 SV=1	P28675|PGS2_CHICK	K.GLPPSLTELHLDGN.K	Y	32.08	1461.75	14	0.7	731.881	2	27.05		F18:468	1	216	229
1-3	5-HCl-D	HCl	5 mL/g	Demineralization	Dialysis	1	7	12	Extracellular Fatty Acid-binding protein	Uncharacterized protein OS=Gallus gallus GN=LCN8 PE=3 SV=2	tr|E1C0K1|E1C0K1_CHICK	L.ASNTDFFLR.E	Y	27.51	1069.52	9	-0.5	535.767	2	24.59		F17:421	1	40	48
1-3	5-HCl-D	HCl	5 mL/g	Demineralization	Dialysis	2	7	12	Extracellular Fatty Acid-binding protein	Uncharacterized protein OS=Gallus gallus GN=LCN8 PE=3 SV=2	tr|E1C0K1|E1C0K1_CHICK	A.LASNTDFFLR.E	Y	36.31	1182.6	10	1.2	592.31	2	26.28		F18:450	2	39	48
1-3	5-HCl-D	HCl	5 mL/g	Demineralization	Dialysis	2	12	4011	F1N9P4	Uncharacterized protein OS=Gallus gallus GN=Gga.51358 PE=3 SV=2	tr|F1N9P4|F1N9P4_CHICK	R.LQGIVSW.G	Y	28.8	801.438	7	1.2	802.447	1	29.97		F18:522	2	248	254
1-3	5-HCl-D	HCl	5 mL/g	Demineralization	Dialysis	1	15	77	Gallinacin-7	Gallinacin-7 OS=Gallus gallus GN=GAL7 PE=2 SV=1	Q6QLR2|GLL7_CHICK	G.Q(-17.03)PFIPRPIDTC(+57.02)R.L	Y	25.74	1481.74	12	1.1	741.881	2	25.38		F17:438	1	21	32	Pyro-glu from Q; Carbamidomethylation	Q1:Pyro-glu from Q:1000.00;C11:Carbamidomethylation:1000.00
1-3	5-HCl-D	HCl	5 mL/g	Demineralization	Dialysis	2	10	28	Histone 2A	Histone H2A-III OS=Gallus gallus PE=1 SV=2	P35062|H2A3_CHICK	R.AGLQFPVGR.V	Y	39.28	943.524	9	1	472.77	2	22.19		F18:358	2	22	30
1-3	5-HCl-D	HCl	5 mL/g	Demineralization	Dialysis	1	5	8	Osteonectin	SPARC OS=Gallus gallus GN=SPARC PE=4 SV=1	tr|F1P291|F1P291_CHICK	K.EQDIDKDLVI	Y	27.09	1186.61	10	0.5	594.312	2	24.74		F17:425	1	289	298
1-3	5-HCl-D	HCl	5 mL/g	Demineralization	Dialysis	1	5	8	Osteonectin	SPARC OS=Gallus gallus GN=SPARC PE=4 SV=1	tr|F1P291|F1P291_CHICK	Q.DIDKDLVI	Y	20.2	929.507	8	0.2	465.761	2	25.3		F17:436	3	291	298
1-3	5-HCl-D	HCl	5 mL/g	Demineralization	Dialysis	1	5	8	Osteonectin	SPARC OS=Gallus gallus GN=SPARC PE=4 SV=1	tr|F1P291|F1P291_CHICK	K.NVLITL.Y	Y	17.05	671.422	6	0.6	672.429	1	30.67		F17:551	1	168	173
1-3	5-HCl-D	HCl	5 mL/g	Demineralization	Dialysis	2	5	8	Osteonectin	SPARC OS=Gallus gallus GN=SPARC PE=4 SV=1	tr|F1P291|F1P291_CHICK	A.C(+57.02)LDTELTEFPLR.M	Y	37.02	1492.72	12	0.1	747.369	2	28.5		F18:496	2	150	161	Carbamidomethylation	C1:Carbamidomethylation:1000.00
1-3	5-HCl-D	HCl	5 mL/g	Demineralization	Dialysis	2	8	55	Ribonucleause homolog	Ribonuclease homolog OS=Gallus gallus PE=2 SV=1	P30374|RSFR_CHICK	R.GGLPVHLDGTSP	Y	36.09	1148.58	12	1.4	1149.59	1	21.61		F18:343	3	128	139
1-3	5-HCl-D	HCl	5 mL/g	Demineralization	Dialysis	1	3	3	Serum Albumin	Serum albumin OS=Gallus gallus GN=ALB PE=1 SV=2	P19121|ALBU_CHICK	R.SQC(+57.02)IM(+15.99)EAEFDEKPADLPSLVEKY.I	Y	31.13	2714.25	23	0.2	905.756	3	27.36		F17:481	1	315	337	Carbamidomethylation; Oxidation (M)	C3:Carbamidomethylation:1000.00;M5:Oxidation (M):1000.00
1-3	5-HCl-D	HCl	5 mL/g	Demineralization	Dialysis	1	3	3	Serum Albumin	Serum albumin OS=Gallus gallus GN=ALB PE=1 SV=2	P19121|ALBU_CHICK	L.SFAVDFEHALQ.S	Y	24.99	1262.59	11	1.2	632.305	2	28.78		F17:508	1	184	194
1-3	5-HCl-D	HCl	5 mL/g	Demineralization	Dialysis	1	3	3	Serum Albumin	Serum albumin OS=Gallus gallus GN=ALB PE=1 SV=2	P19121|ALBU_CHICK	K.YVPPPFNPDMF(+15.99)SFDEK.L	Y	26.85	1944.86	16	1.5	973.439	2	29.56		F17:524	3	525	540	Oxidation or Hydroxylation	F11:Oxidation or Hydroxylation:12.33
1-3	5-HCl-D	HCl	5 mL/g	Demineralization	Dialysis	1	3	3	Serum Albumin	Serum albumin OS=Gallus gallus GN=ALB PE=1 SV=2	P19121|ALBU_CHICK	S.IILDEIC(+57.02)QVEKL.R	Y	21.82	1471.8	12	0.7	736.906	2	30.34		F17:543	1	96	107	Carbamidomethylation	C7:Carbamidomethylation:1000.00
1-3	5-HCl-D	HCl	5 mL/g	Demineralization	Dialysis	1	3	3	Serum Albumin	Serum albumin OS=Gallus gallus GN=ALB PE=1 SV=2	P19121|ALBU_CHICK	K.YVPPPFNPDM(+15.99)F.S	Y	35.6	1338.6	11	1.1	670.306	2	30.7		F17:552	3	525	535	Oxidation (M)	M10:Oxidation (M):1000.00
1-3	5-HCl-D	HCl	5 mL/g	Demineralization	Dialysis	2	3	3	Serum Albumin	Serum albumin OS=Gallus gallus GN=ALB PE=1 SV=2	P19121|ALBU_CHICK	D.TKYVPPPFNPDM(+15.99)FSFDEK.L	Y	33.41	2174	18	0.9	725.676	3	26.82		F18:461	4	523	540	Oxidation (M)	M12:Oxidation (M):1000.00
1-3	5-HCl-D	HCl	5 mL/g	Demineralization	Dialysis	2	3	3	Serum Albumin	Serum albumin OS=Gallus gallus GN=ALB PE=1 SV=2	P19121|ALBU_CHICK	K.ADPERNEC(+57.02)FLSF.K	Y	30.48	1483.64	12	1	742.828	2	27.91		F18:481	1	121	132	Carbamidomethylation	C8:Carbamidomethylation:1000.00
1-3	5-HCl-D	HCl	5 mL/g	Demineralization	Dialysis	2	3	3	Serum Albumin	Serum albumin OS=Gallus gallus GN=ALB PE=1 SV=2	P19121|ALBU_CHICK	D.TKYVPPPFNPDMF.S	Y	33.9	1551.74	13	1.2	776.88	2	29.51		F18:512	2	523	535
1-3	5-HCl-D	HCl	5 mL/g	Demineralization	Dialysis	2	3	3	Serum Albumin	Serum albumin OS=Gallus gallus GN=ALB PE=1 SV=2	P19121|ALBU_CHICK	K.YVPPPFNPDM(+15.99)FSFDEK.L	Y	38.76	1944.86	16	0.5	649.294	3	29.54		F18:513	3	525	540	Oxidation (M)	M10:Oxidation (M):1000.00
1-3	5-HCl-D	HCl	5 mL/g	Demineralization	Dialysis	2	3	3	Serum Albumin	Serum albumin OS=Gallus gallus GN=ALB PE=1 SV=2	P19121|ALBU_CHICK	K.YVPPPFNPDMF.S	Y	40.12	1322.6	11	0.5	662.308	2	34.37		F18:589	2	525	535
1-3	5-HCl-D	HCl	5 mL/g	Demineralization	Dialysis	2	3	3	Serum Albumin	Serum albumin OS=Gallus gallus GN=ALB PE=1 SV=2	P19121|ALBU_CHICK	K.C(+57.02)VANEDAPEC(+57.02)SKPLPSIILDEIC(+57.02)QVE.K	Y	17.76	2985.38	26	1.5	996.135	3	35.61		F18:607	1	80	105	Carbamidomethylation	C1:Carbamidomethylation:1000.00;C10:Carbamidomethylation:1000.00;C23:Carbamidomethylation:1000.00
1-3	5-HCl-D	HCl	5 mL/g	Demineralization	Dialysis	2	3	3	Serum Albumin	Serum albumin OS=Gallus gallus GN=ALB PE=1 SV=2	P19121|ALBU_CHICK	K.C(+57.02)VANEDAPEC(+57.02)SKPLPSIILDEIC(+57.02)QVEKL.R	Y	33.32	3226.56	28	0.1	1076.53	3	38.5		F18:643	1	80	107	Carbamidomethylation	C1:Carbamidomethylation:1000.00;C10:Carbamidomethylation:1000.00;C23:Carbamidomethylation:1000.00
1-3	5-HCl-D	HCl	5 mL/g	Demineralization	Dialysis	2	3	3	Serum Albumin	Serum albumin OS=Gallus gallus GN=ALB PE=1 SV=2	P19121|ALBU_CHICK	C.VANEDAPEC(+57.02)SKPLPSIILDEIC(+57.02)QVEKL.R	Y	26.28	3066.53	27	0.4	1023.18	3	38.67		F18:645	1	81	107	Carbamidomethylation	C9:Carbamidomethylation:1000.00;C22:Carbamidomethylation:1000.00
1-3	5-HCl-D	HCl	5 mL/g	Demineralization	Dialysis	1	14	616	Thrombospondin-1	Uncharacterized protein OS=Gallus gallus GN=THBS1 PE=4 SV=2	tr|F1P0J8|F1P0J8_CHICK	R.TAESRGDDDSVFDIF.E	Y	17.39	1672.72	15	1.4	837.369	2	32.84		F17:588	1	22	36
1-3	5-HCl-D	HCl	5 mL/g	Demineralization	Dialysis	1	14	616	Thrombospondin-1	Uncharacterized protein OS=Gallus gallus GN=THBS1 PE=4 SV=2	tr|F1P0J8|F1P0J8_CHICK	K.FQDLLDIIHA.E	Y	22.58	1183.62	10	0.2	592.819	2	33.69		F17:602	1	80	89
1-3	5-HCl-P	HCl	5 mL/g	Demineralization	Precipitation	1	25	56	12K Serum	12K serum protein beta-2-m cross-reactive (Fragment) OS=Gallus gallus PE=1 SV=1	tr|Q7LZS1|Q7LZS1_CHICK	K.GC(+57.02)MLDGVLYPFGEIPR.T	Y	36.32	1822.87	16	1.2	912.446	2	33.35		F19:705	2	15	30	Carbamidomethylation	C2:Carbamidomethylation:1000.00
1-3	5-HCl-P	HCl	5 mL/g	Demineralization	Precipitation	1	4	7	Alpha-2-HS-glycoprotein	Uncharacterized protein OS=Gallus gallus GN=AHSG PE=4 SV=1	tr|E1BZE1|E1BZE1_CHICK	R.AAAEVAQHDKVPHPVGFVPPPPLCPGK(+57.02).I	Y	35.69	2814.46	27	0.6	563.9	5	19.82		F19:328	6	312	338	Carbamidomethylation (DHKE X@N-term)	K27:Carbamidomethylation (DHKE X@N-term):112.92
1-3	5-HCl-P	HCl	5 mL/g	Demineralization	Precipitation	1	4	7	Alpha-2-HS-glycoprotein	Uncharacterized protein OS=Gallus gallus GN=AHSG PE=4 SV=1	tr|E1BZE1|E1BZE1_CHICK	K.VNGQ(+.98)FSVLASK.C	Y	39.67	1149.6	11	1.4	575.809	2	20.49		F19:351	2	118	128	Deamidation (NQ)	Q4:Deamidation (NQ):13.45
1-3	5-HCl-P	HCl	5 mL/g	Demineralization	Precipitation	1	4	7	Alpha-2-HS-glycoprotein	Uncharacterized protein OS=Gallus gallus GN=AHSG PE=4 SV=1	tr|E1BZE1|E1BZE1_CHICK	K.MVTEPSQDLIAEC(+57.02)QLYGHQPGVTYPHPGQDTSAGLVPSAGQGFTNHN(+.98)LK.I	Y	23.61	5247.47	49	1.9	875.587	6	24.89		F19:490	1	235	283	Carbamidomethylation; Deamidation (NQ)	C13:Carbamidomethylation:1000.00;N47:Deamidation (NQ):95.39
1-3	5-HCl-P	HCl	5 mL/g	Demineralization	Precipitation	1	4	7	Alpha-2-HS-glycoprotein	Uncharacterized protein OS=Gallus gallus GN=AHSG PE=4 SV=1	tr|E1BZE1|E1BZE1_CHICK	K.ISHNNPVASES(+79.97)SSSEFPSLLSAK.S	Y	44.21	2467.13	23	0.7	823.383	3	25.52		F19:511	1	284	306	Phosphorylation (STY)	S11:Phosphorylation (STY):0.00
1-3	5-HCl-P	HCl	5 mL/g	Demineralization	Precipitation	1	4	7	Alpha-2-HS-glycoprotein	Uncharacterized protein OS=Gallus gallus GN=AHSG PE=4 SV=1	tr|E1BZE1|E1BZE1_CHICK	K.DNLAAC(+57.02)QLLPEDQSNFGFCTAK(+57.02).M	Y	38.05	2498.12	22	1.2	833.715	3	28.01		F19:578	2	213	234	Carbamidomethylation; Carbamidomethylation (DHKE X@N-term)	C6:Carbamidomethylation:1000.00;K22:Carbamidomethylation (DHKE X@N-term):29.98
1-3	5-HCl-P	HCl	5 mL/g	Demineralization	Precipitation	1	4	7	Alpha-2-HS-glycoprotein	Uncharacterized protein OS=Gallus gallus GN=AHSG PE=4 SV=1	tr|E1BZE1|E1BZE1_CHICK	K.DNLAAC(+57.02)QLLPEDQSNFGFC(+57.02)TAK.M	Y	23.42	2498.12	22	1.3	1250.07	2	28.03		F19:579	1	213	234	Carbamidomethylation	C6:Carbamidomethylation:1000.00;C19:Carbamidomethylation:1000.00
1-3	5-HCl-P	HCl	5 mL/g	Demineralization	Precipitation	1	4	7	Alpha-2-HS-glycoprotein	Uncharacterized protein OS=Gallus gallus GN=AHSG PE=4 SV=1	tr|E1BZE1|E1BZE1_CHICK	K.NPDVYLM(+15.99)LLEIGR.A	Y	46.21	1547.8	13	1.6	774.909	2	32.8		F19:691	2	172	184	Oxidation (M)	M7:Oxidation (M):1000.00
1-3	5-HCl-P	HCl	5 mL/g	Demineralization	Precipitation	1	4	7	Alpha-2-HS-glycoprotein	Uncharacterized protein OS=Gallus gallus GN=AHSG PE=4 SV=1	tr|E1BZE1|E1BZE1_CHICK	A.APAAPPPPLGC(+57.02)DDPEIEAAAEFAVIYINGHSHHGYR.F	Y	58.66	3838.82	36	0.6	768.771	5	33.33		F19:704	5	19	54	Carbamidomethylation	C11:Carbamidomethylation:1000.00
1-3	5-HCl-P	HCl	5 mL/g	Demineralization	Precipitation	1	4	7	Alpha-2-HS-glycoprotein	Uncharacterized protein OS=Gallus gallus GN=AHSG PE=4 SV=1	tr|E1BZE1|E1BZE1_CHICK	A.PAAPPPPLGC(+57.02)DDPEIEAAAEFAVIYINGHSHHGYR.F	Y	48.83	3767.78	35	0.9	754.564	5	33.41		F19:707	2	20	54	Carbamidomethylation	C10:Carbamidomethylation:1000.00
1-3	5-HCl-P	HCl	5 mL/g	Demineralization	Precipitation	1	4	7	Alpha-2-HS-glycoprotein	Uncharacterized protein OS=Gallus gallus GN=AHSG PE=4 SV=1	tr|E1BZE1|E1BZE1_CHICK	K.NPDVYLMLLEIGR.A	Y	42.26	1531.81	13	0.6	766.911	2	35.53		F19:758	3	172	184
1-3	5-HCl-P	HCl	5 mL/g	Demineralization	Precipitation	1	4	7	Alpha-2-HS-glycoprotein	Uncharacterized protein OS=Gallus gallus GN=AHSG PE=4 SV=1	tr|E1BZE1|E1BZE1_CHICK	K.NPDVY(+15.99)LM(+15.99)LLEIGR.A	Y	18.55	1563.8	13	1.2	782.907	2	35.79		F19:765	1	172	184	Oxidation or Hydroxylation; Oxidation (M)	Y5:Oxidation or Hydroxylation:9.86;M7:Oxidation (M):1000.00
1-3	5-HCl-P	HCl	5 mL/g	Demineralization	Precipitation	2	4	7	Alpha-2-HS-glycoprotein	Uncharacterized protein OS=Gallus gallus GN=AHSG PE=4 SV=1	tr|E1BZE1|E1BZE1_CHICK	R.AAAEVAQHDKVPHPVGFVPPPPLC(+57.02)PGK.I	Y	46.17	2814.46	27	1.6	939.163	3	19.7		F20:322	8	312	338	Carbamidomethylation	C24:Carbamidomethylation:1000.00
1-3	5-HCl-P	HCl	5 mL/g	Demineralization	Precipitation	2	4	7	Alpha-2-HS-glycoprotein	Uncharacterized protein OS=Gallus gallus GN=AHSG PE=4 SV=1	tr|E1BZE1|E1BZE1_CHICK	K.VN(+.98)GQFSVLASK.C	Y	41.01	1149.6	11	0.9	575.809	2	20.43		F20:346	1	118	128	Deamidation (NQ)	N2:Deamidation (NQ):26.31
1-3	5-HCl-P	HCl	5 mL/g	Demineralization	Precipitation	2	4	7	Alpha-2-HS-glycoprotein	Uncharacterized protein OS=Gallus gallus GN=AHSG PE=4 SV=1	tr|E1BZE1|E1BZE1_CHICK	K.M(+15.99)VTEPSQDLIAEC(+57.02)QLYGHQPGVTYPHPGQDTSAGLVPSAGQGFTNHNLK.I	Y	29.44	5262.48	49	2	1053.5	5	24.22		F20:464	3	235	283	Oxidation (M); Carbamidomethylation	M1:Oxidation (M):1000.00;C13:Carbamidomethylation:1000.00
1-3	5-HCl-P	HCl	5 mL/g	Demineralization	Precipitation	2	4	7	Alpha-2-HS-glycoprotein	Uncharacterized protein OS=Gallus gallus GN=AHSG PE=4 SV=1	tr|E1BZE1|E1BZE1_CHICK	K.MVTEPSQDLIAEC(+57.02)QLYGHQPGVTYPHPGQDTSAGLVPSAGQGFTNHNLK.I	Y	22.45	5246.48	49	1.3	1050.31	5	24.57		F20:475	1	235	283	Carbamidomethylation	C13:Carbamidomethylation:1000.00
1-3	5-HCl-P	HCl	5 mL/g	Demineralization	Precipitation	2	4	7	Alpha-2-HS-glycoprotein	Uncharacterized protein OS=Gallus gallus GN=AHSG PE=4 SV=1	tr|E1BZE1|E1BZE1_CHICK	K.D(+57.02)NLAACQLLPEDQSNFGFC(+57.02)TAK.M	Y	33.58	2498.12	22	1.9	1250.07	2	27.95		F20:564	2	213	234	Carbamidomethylation (DHKE X@N-term); Carbamidomethylation	D1:Carbamidomethylation (DHKE X@N-term):32.22;C19:Carbamidomethylation:1000.00
1-3	5-HCl-P	HCl	5 mL/g	Demineralization	Precipitation	2	4	7	Alpha-2-HS-glycoprotein	Uncharacterized protein OS=Gallus gallus GN=AHSG PE=4 SV=1	tr|E1BZE1|E1BZE1_CHICK	A.APAAPPPPLGC(+57.02)DDPEIEAAAEFAVIYIN(+.98)GHSHHGYR.F	Y	63.86	3839.8	36	0.3	768.967	5	31.74		F20:638	6	19	54	Carbamidomethylation; Deamidation (NQ)	C11:Carbamidomethylation:1000.00;N28:Deamidation (NQ):1000.00
1-3	5-HCl-P	HCl	5 mL/g	Demineralization	Precipitation	1	28	2189	Annexin A5	Annexin A5 OS=Gallus gallus GN=ANXA5 PE=1 SV=2	P17153|ANXA5_CHICK	R.DLVDDLKSELTGKFETL.M	Y	26.58	1921.99	17	0.9	641.671	3	36.37		F19:778	2	64	80
1-3	5-HCl-P	HCl	5 mL/g	Demineralization	Precipitation	1	5	6	Apolipoprotein	Apolipoprotein A-I OS=Gallus gallus GN=APOA1 PE=1 SV=2	P08250|APOA1_CHICK	K.NLAPYSDELR.Q	Y	28.41	1176.58	10	0.5	589.296	2	19.32		F19:311	2	185	194
1-3	5-HCl-P	HCl	5 mL/g	Demineralization	Precipitation	1	5	6	Apolipoprotein	Apolipoprotein A-I OS=Gallus gallus GN=APOA1 PE=1 SV=2	P08250|APOA1_CHICK	K.M(+15.99)TPLVQEFR.E	Y	36.8	1135.57	9	0.9	568.793	2	20.58		F19:354	2	230	238	Oxidation (M)	M1:Oxidation (M):1000.00
1-3	5-HCl-P	HCl	5 mL/g	Demineralization	Precipitation	1	5	6	Apolipoprotein	Apolipoprotein A-I OS=Gallus gallus GN=APOA1 PE=1 SV=2	P08250|APOA1_CHICK	K.LADNLDTLSAAAAK.L	Y	46.33	1372.72	14	0.7	687.368	2	21.12	70300000	F19:371	3	69	82
1-3	5-HCl-P	HCl	5 mL/g	Demineralization	Precipitation	1	5	6	Apolipoprotein	Apolipoprotein A-I OS=Gallus gallus GN=APOA1 PE=1 SV=2	P08250|APOA1_CHICK	K.ASGKDAIAQFESSAVGK.Q	Y	47.83	1664.84	17	1.3	833.427	2	21.14		F19:372	4	47	63
1-3	5-HCl-P	HCl	5 mL/g	Demineralization	Precipitation	1	5	6	Apolipoprotein	Apolipoprotein A-I OS=Gallus gallus GN=APOA1 PE=1 SV=2	P08250|APOA1_CHICK	R.IRD(+15.99)MVDVYLETVK.A	Y	37.41	1595.82	13	0.7	532.949	3	22.03		F19:401	1	34	46	Oxidation or Hydroxylation	D3:Oxidation or Hydroxylation:0.00
1-3	5-HCl-P	HCl	5 mL/g	Demineralization	Precipitation	1	5	6	Apolipoprotein	Apolipoprotein A-I OS=Gallus gallus GN=APOA1 PE=1 SV=2	P08250|APOA1_CHICK	K.DAIAQFESSAVGK.Q	Y	40.75	1321.65	13	0.8	661.833	2	23.6		F19:452	1	51	63
1-3	5-HCl-P	HCl	5 mL/g	Demineralization	Precipitation	1	5	6	Apolipoprotein	Apolipoprotein A-I OS=Gallus gallus GN=APOA1 PE=1 SV=2	P08250|APOA1_CHICK	R.LISFLDELQK.S	Y	40.94	1204.67	10	0.7	603.343	2	30.37		F19:632	4	252	261
1-3	5-HCl-P	HCl	5 mL/g	Demineralization	Precipitation	1	5	6	Apolipoprotein	Apolipoprotein A-I OS=Gallus gallus GN=APOA1 PE=1 SV=2	P08250|APOA1_CHICK	R.LISF(+31.99)LDELQK.S	Y	19.45	1236.66	10	1.6	619.338	2	30.42		F19:634	1	252	261	Dihydroxy	F4:Dihydroxy:36.87
1-3	5-HCl-P	HCl	5 mL/g	Demineralization	Precipitation	1	5	6	Apolipoprotein	Apolipoprotein A-I OS=Gallus gallus GN=APOA1 PE=1 SV=2	P08250|APOA1_CHICK	R.LISF(+15.99)LDELQK.S	Y	30.77	1220.67	10	2	611.341	2	30.45		F19:635	2	252	261	Oxidation or Hydroxylation	F4:Oxidation or Hydroxylation:45.01
1-3	5-HCl-P	HCl	5 mL/g	Demineralization	Precipitation	1	5	6	Apolipoprotein	Apolipoprotein A-I OS=Gallus gallus GN=APOA1 PE=1 SV=2	P08250|APOA1_CHICK	R.EM(+15.99)WLKDTEALRAELTKDLEEVKEK.I	Y	34.35	2919.49	24	1	584.906	5	30.7		F19:643	2	96	119	Oxidation (M)	M2:Oxidation (M):1000.00
1-3	5-HCl-P	HCl	5 mL/g	Demineralization	Precipitation	2	5	6	Apolipoprotein	Apolipoprotein A-I OS=Gallus gallus GN=APOA1 PE=1 SV=2	P08250|APOA1_CHICK	K.NLAPYSDELRQK.L	Y	15.23	1432.73	12	0.7	717.373	2	16.49		F20:214	1	185	196
1-3	5-HCl-P	HCl	5 mL/g	Demineralization	Precipitation	2	5	6	Apolipoprotein	Apolipoprotein A-I OS=Gallus gallus GN=APOA1 PE=1 SV=2	P08250|APOA1_CHICK	R.IRDM(+15.99)VDVYLETVK.A	Y	37.74	1595.82	13	0.8	798.919	2	21.92		F20:392	3	34	46	Oxidation (M)	M4:Oxidation (M):1000.00
1-3	5-HCl-P	HCl	5 mL/g	Demineralization	Precipitation	2	5	6	Apolipoprotein	Apolipoprotein A-I OS=Gallus gallus GN=APOA1 PE=1 SV=2	P08250|APOA1_CHICK	K.LEEIREK(+42.01)GIPQ(+.98)ASEY(+15.99)QAK.V	Y	17.98	2147.07	18	-1.8	1074.54	2	22.83		F20:423	1	201	218	Acetylation (K); Deamidation (NQ); Oxidation or Hydroxylation	K7:Acetylation (K):48.34;Q11:Deamidation (NQ):22.08;Y15:Oxidation or Hydroxylation:0.00
1-3	5-HCl-P	HCl	5 mL/g	Demineralization	Precipitation	2	5	6	Apolipoprotein	Apolipoprotein A-I OS=Gallus gallus GN=APOA1 PE=1 SV=2	P08250|APOA1_CHICK	K.L(+42.01)EEIREKGIPQASEY(+15.99)Q(+.98)AK.V	Y	17.85	2147.07	18	-1.2	1074.54	2	23.05		F20:430	1	201	218	Acetylation (N-term); Oxidation or Hydroxylation; Deamidation (NQ)	L1:Acetylation (N-term):1000.00;Y15:Oxidation or Hydroxylation:0.00;Q16:Deamidation (NQ):0.00
1-3	5-HCl-P	HCl	5 mL/g	Demineralization	Precipitation	2	5	6	Apolipoprotein	Apolipoprotein A-I OS=Gallus gallus GN=APOA1 PE=1 SV=2	P08250|APOA1_CHICK	K.IRPFLDQFSAK.W	Y	44.87	1320.72	11	1.4	661.368	2	23.44		F20:440	3	120	130
1-3	5-HCl-P	HCl	5 mL/g	Demineralization	Precipitation	2	5	6	Apolipoprotein	Apolipoprotein A-I OS=Gallus gallus GN=APOA1 PE=1 SV=2	P08250|APOA1_CHICK	K.MTPLVQEFR.E	Y	40.61	1119.57	9	1.1	560.795	2	23.63		F20:446	2	230	238
1-3	5-HCl-P	HCl	5 mL/g	Demineralization	Precipitation	2	5	6	Apolipoprotein	Apolipoprotein A-I OS=Gallus gallus GN=APOA1 PE=1 SV=2	P08250|APOA1_CHICK	R.DM(+15.99)VDVYLETVK.A	Y	35.07	1326.64	11	2	664.327	2	23.99		F20:457	1	36	46	Oxidation (M)	M2:Oxidation (M):1000.00
1-3	5-HCl-P	HCl	5 mL/g	Demineralization	Precipitation	2	5	6	Apolipoprotein	Apolipoprotein A-I OS=Gallus gallus GN=APOA1 PE=1 SV=2	P08250|APOA1_CHICK	R.LTPVAQELKELTK.Q	Y	42.67	1468.85	13	1	735.433	2	25.24		F20:490	4	142	154
1-3	5-HCl-P	HCl	5 mL/g	Demineralization	Precipitation	2	5	6	Apolipoprotein	Apolipoprotein A-I OS=Gallus gallus GN=APOA1 PE=1 SV=2	P08250|APOA1_CHICK	T.PVAQELKELTK.Q	Y	20.51	1254.72	11	1	628.367	2	25.39		F20:495	1	144	154
1-3	5-HCl-P	HCl	5 mL/g	Demineralization	Precipitation	2	5	6	Apolipoprotein	Apolipoprotein A-I OS=Gallus gallus GN=APOA1 PE=1 SV=2	P08250|APOA1_CHICK	K.DTEALRAELTKDLEEVKEK.I	Y	29.31	2216.15	19	1.1	555.046	4	26.03		F20:513	1	101	119
1-3	5-HCl-P	HCl	5 mL/g	Demineralization	Precipitation	1	31	2186	Basement Mem	Basement membrane-specific heparan sulfate proteoglycan core protein OS=Gallus gallus GN=HSPG PE=2 SV=1	tr|Q6KDZ1|Q6KDZ1_CHICK	R.GAPDLQDTIELELR.T	Y	40.53	1568.8	14	0.9	785.41	2	29.63		F19:616	1	3908	3921
1-3	5-HCl-P	HCl	5 mL/g	Demineralization	Precipitation	1	18	618	Collagen XI, alpha 1	Uncharacterized protein OS=Gallus gallus GN=COL11A1 PE=4 SV=2	tr|F1P4K9|F1P4K9_CHICK	K.KGIQSFLLSVYNEQGIQQVGVEVGR.S	Y	29.38	2747.46	25	4.1	916.831	3	31.62		F19:665	1	112	136
1-3	5-HCl-P	HCl	5 mL/g	Demineralization	Precipitation	1	18	618	Collagen XI, alpha 1	Uncharacterized protein OS=Gallus gallus GN=COL11A1 PE=4 SV=2	tr|F1P4K9|F1P4K9_CHICK	K.QLYPDGDFPEDFSILMTVKPK.K	Y	34.92	2439.2	21	1.8	814.076	3	32.83		F19:692	1	91	111
1-3	5-HCl-P	HCl	5 mL/g	Demineralization	Precipitation	1	18	618	Collagen XI, alpha 1	Uncharacterized protein OS=Gallus gallus GN=COL11A1 PE=4 SV=2	tr|F1P4K9|F1P4K9_CHICK	R.ILDEEVFEGEIQQLLIIADPR.A	Y	32.18	2439.29	21	0.8	814.104	3	41.98		F19:849	2	213	233
1-3	5-HCl-P	HCl	5 mL/g	Demineralization	Precipitation	1	3	4	Collagen I, alpha 1	Collagen alpha-1(I) chain OS=Gallus gallus GN=COL1A1 PE=1 SV=3	P02457|CO1A1_CHICK	K.GDRGETGPAGP(+15.99)PGAPGAP(+15.99)GAP(+15.99)GPVGPAGK.N	Y	16.6	2496.2	29	1.1	833.075	3	13.69		F19:135	1	1023	1051	Oxidation or Hydroxylation	P11:Oxidation or Hydroxylation:0.00;P18:Oxidation or Hydroxylation:28.36;P21:Oxidation or Hydroxylation:11.10
1-3	5-HCl-P	HCl	5 mL/g	Demineralization	Precipitation	1	3	4	Collagen I, alpha 1	Collagen alpha-1(I) chain OS=Gallus gallus GN=COL1A1 PE=1 SV=3	P02457|CO1A1_CHICK	R.GFPGAD(+15.99)GIAGPKGPP(+15.99)GER.G	Y	31.71	1710.83	18	0.9	856.424	2	16.13		F19:205	1	483	500	Oxidation or Hydroxylation	D6:Oxidation or Hydroxylation:0.00;P15:Oxidation or Hydroxylation:0.00
1-3	5-HCl-P	HCl	5 mL/g	Demineralization	Precipitation	1	3	4	Collagen I, alpha 1	Collagen alpha-1(I) chain OS=Gallus gallus GN=COL1A1 PE=1 SV=3	P02457|CO1A1_CHICK	R.GLTGPIGPPGPAGAPGDK(+42.01)GE(+21.98)AGPPGPAGPTGAR.G	Y	22.05	2894.43	33	-3.3	965.813	3	16.32		F19:211	1	753	785	Acetylation (K); Sodium adduct	K18:Acetylation (K):1000.00;E20:Sodium adduct:7.77
1-3	5-HCl-P	HCl	5 mL/g	Demineralization	Precipitation	1	3	4	Collagen I, alpha 1	Collagen alpha-1(I) chain OS=Gallus gallus GN=COL1A1 PE=1 SV=3	P02457|CO1A1_CHICK	K.Q(+42.01)GPSGASGERGPPGPMGPP(+15.99)GLAGPP(+15.99)GEAGR.E	Y	20.73	2768.29	30	0.8	923.773	3	16.39		F19:213	1	974	1003	Acetylation (N-term); Oxidation or Hydroxylation	Q1:Acetylation (N-term):1000.00;P19:Oxidation or Hydroxylation:17.01;P25:Oxidation or Hydroxylation:0.00
1-3	5-HCl-P	HCl	5 mL/g	Demineralization	Precipitation	1	3	4	Collagen I, alpha 1	Collagen alpha-1(I) chain OS=Gallus gallus GN=COL1A1 PE=1 SV=3	P02457|CO1A1_CHICK	K.GSP(+15.99)GADGPIGAP(+15.99)GTP(+15.99)GPQGIAGQR.G	Y	29.41	2162.04	24	1.5	1082.03	2	16.69		F19:222	2	924	947	Oxidation or Hydroxylation	P3:Oxidation or Hydroxylation:0.00;P12:Oxidation or Hydroxylation:67.69;P15:Oxidation or Hydroxylation:15.73
1-3	5-HCl-P	HCl	5 mL/g	Demineralization	Precipitation	1	3	4	Collagen I, alpha 1	Collagen alpha-1(I) chain OS=Gallus gallus GN=COL1A1 PE=1 SV=3	P02457|CO1A1_CHICK	K.GATGAP(+15.99)GIAGAP(+15.99)GFPGAR(+15.99).G	Y	26.58	1571.77	18	1.5	786.893	2	16.95		F19:231	1	387	404	Oxidation or Hydroxylation	P6:Oxidation or Hydroxylation:63.64;P12:Oxidation or Hydroxylation:0.00;R18:Oxidation or Hydroxylation:5.77
1-3	5-HCl-P	HCl	5 mL/g	Demineralization	Precipitation	1	3	4	Collagen I, alpha 1	Collagen alpha-1(I) chain OS=Gallus gallus GN=COL1A1 PE=1 SV=3	P02457|CO1A1_CHICK	K.GATGAP(+15.99)GIAGAP(+15.99)GFP(+15.99)GAR.G	Y	38.68	1571.77	18	1.4	786.893	2	17.1		F19:236	2	387	404	Oxidation or Hydroxylation	P6:Oxidation or Hydroxylation:98.53;P12:Oxidation or Hydroxylation:17.01;P15:Oxidation or Hydroxylation:6.63
1-3	5-HCl-P	HCl	5 mL/g	Demineralization	Precipitation	1	3	4	Collagen I, alpha 1	Collagen alpha-1(I) chain OS=Gallus gallus GN=COL1A1 PE=1 SV=3	P02457|CO1A1_CHICK	R.GPP(+15.99)GPMGPP(+15.99)GLAGPP(+15.99)GEAGR.E	Y	44.36	1815.86	20	1.5	908.937	2	17.24		F19:241	3	984	1003	Oxidation or Hydroxylation	P3:Oxidation or Hydroxylation:11.06;P9:Oxidation or Hydroxylation:27.96;P15:Oxidation or Hydroxylation:11.06
1-3	5-HCl-P	HCl	5 mL/g	Demineralization	Precipitation	1	3	4	Collagen I, alpha 1	Collagen alpha-1(I) chain OS=Gallus gallus GN=COL1A1 PE=1 SV=3	P02457|CO1A1_CHICK	R.GFP(+15.99)GADGIAGPK.G	Y	38.63	1101.55	12	0.8	551.78	2	17.29		F19:243	3	483	494	Oxidation or Hydroxylation	P3:Oxidation or Hydroxylation:9.34
1-3	5-HCl-P	HCl	5 mL/g	Demineralization	Precipitation	1	3	4	Collagen I, alpha 1	Collagen alpha-1(I) chain OS=Gallus gallus GN=COL1A1 PE=1 SV=3	P02457|CO1A1_CHICK	R.GLTGPIGPPGP(+15.99)AGAP(+15.99)GDKGEAGPP(+15.99)GPAGPTGAR.G	Y	28.04	2878.42	33	1.6	960.482	3	17.43		F19:248	1	753	785	Oxidation or Hydroxylation	P11:Oxidation or Hydroxylation:0.00;P15:Oxidation or Hydroxylation:0.00;P24:Oxidation or Hydroxylation:11.06
1-3	5-HCl-P	HCl	5 mL/g	Demineralization	Precipitation	1	3	4	Collagen I, alpha 1	Collagen alpha-1(I) chain OS=Gallus gallus GN=COL1A1 PE=1 SV=3	P02457|CO1A1_CHICK	R.GLTGPIGPP(+15.99)GPAGAPGDKGEAGPP(+15.99)GPAGPTGAR.G	Y	43.38	2862.43	33	1.2	955.15	3	17.57		F19:252	2	753	785	Oxidation or Hydroxylation	P9:Oxidation or Hydroxylation:42.89;P24:Oxidation or Hydroxylation:42.78
1-3	5-HCl-P	HCl	5 mL/g	Demineralization	Precipitation	1	3	4	Collagen I, alpha 1	Collagen alpha-1(I) chain OS=Gallus gallus GN=COL1A1 PE=1 SV=3	P02457|CO1A1_CHICK	R.GFP(+15.99)GLP(+15.99)GPSGEP(+15.99)GK.Q	Y	24.46	1343.64	14	1.1	672.826	2	18.27		F19:276	1	960	973	Oxidation or Hydroxylation	P3:Oxidation or Hydroxylation:14.02;P6:Oxidation or Hydroxylation:45.01;P12:Oxidation or Hydroxylation:11.10
1-3	5-HCl-P	HCl	5 mL/g	Demineralization	Precipitation	1	3	4	Collagen I, alpha 1	Collagen alpha-1(I) chain OS=Gallus gallus GN=COL1A1 PE=1 SV=3	P02457|CO1A1_CHICK	R.GFSGLQGP(+31.99)PGPPGAP(+15.99)GEQGPSGASGPAGPR.G	Y	29.06	2688.25	30	1.1	897.092	3	19.04		F19:302	1	1101	1130	Dihydroxy; Oxidation or Hydroxylation	P8:Dihydroxy:0.00;P15:Oxidation or Hydroxylation:22.09
1-3	5-HCl-P	HCl	5 mL/g	Demineralization	Precipitation	1	3	4	Collagen I, alpha 1	Collagen alpha-1(I) chain OS=Gallus gallus GN=COL1A1 PE=1 SV=3	P02457|CO1A1_CHICK	R.GFP(+15.99)GLPGPSGEP(+15.99)GK.Q	Y	16.16	1327.64	14	0.7	664.828	2	19.08		F19:303	1	960	973	Oxidation or Hydroxylation	P3:Oxidation or Hydroxylation:17.01;P12:Oxidation or Hydroxylation:4.73
1-3	5-HCl-P	HCl	5 mL/g	Demineralization	Precipitation	1	3	4	Collagen I, alpha 1	Collagen alpha-1(I) chain OS=Gallus gallus GN=COL1A1 PE=1 SV=3	P02457|CO1A1_CHICK	R.GFSGLQGP(+15.99)PGPP(+15.99)GAP(+15.99)GEQGPSGASGPAGPR.G	Y	30.53	2688.25	30	3.7	1345.14	2	19.16		F19:306	1	1101	1130	Oxidation or Hydroxylation	P8:Oxidation or Hydroxylation:0.00;P12:Oxidation or Hydroxylation:11.06;P15:Oxidation or Hydroxylation:56.99
1-3	5-HCl-P	HCl	5 mL/g	Demineralization	Precipitation	1	3	4	Collagen I, alpha 1	Collagen alpha-1(I) chain OS=Gallus gallus GN=COL1A1 PE=1 SV=3	P02457|CO1A1_CHICK	R.GFSGLQGPPGP(+15.99)PGAP(+15.99)GEQGPSGASGPAGPR.G	Y	27.72	2672.26	30	1.6	891.761	3	19.52		F19:318	1	1101	1130	Oxidation or Hydroxylation	P11:Oxidation or Hydroxylation:0.00;P15:Oxidation or Hydroxylation:28.36
1-3	5-HCl-P	HCl	5 mL/g	Demineralization	Precipitation	1	3	4	Collagen I, alpha 1	Collagen alpha-1(I) chain OS=Gallus gallus GN=COL1A1 PE=1 SV=3	P02457|CO1A1_CHICK	R.GFSGLQGPP(+15.99)GPPGAP(+15.99)GEQGPSGASGPAGPR.G	Y	43.45	2672.26	30	0.8	1337.14	2	19.57		F19:320	1	1101	1130	Oxidation or Hydroxylation	P9:Oxidation or Hydroxylation:38.64;P15:Oxidation or Hydroxylation:76.17
1-3	5-HCl-P	HCl	5 mL/g	Demineralization	Precipitation	1	3	4	Collagen I, alpha 1	Collagen alpha-1(I) chain OS=Gallus gallus GN=COL1A1 PE=1 SV=3	P02457|CO1A1_CHICK	K.DGLNGLP(+15.99)GPIGP(+15.99)PGPR(+15.99).G	Y	37.99	1560.79	16	0.8	781.403	2	20.02		F19:335	2	1142	1157	Oxidation or Hydroxylation	P7:Oxidation or Hydroxylation:43.88;P12:Oxidation or Hydroxylation:0.00;R16:Oxidation or Hydroxylation:0.00
1-3	5-HCl-P	HCl	5 mL/g	Demineralization	Precipitation	1	3	4	Collagen I, alpha 1	Collagen alpha-1(I) chain OS=Gallus gallus GN=COL1A1 PE=1 SV=3	P02457|CO1A1_CHICK	K.DGLNGLP(+15.99)GPIGPP(+15.99)GPR(+15.99).G	Y	38.4	1560.79	16	0.6	781.403	2	20.29		F19:344	2	1142	1157	Oxidation or Hydroxylation	P7:Oxidation or Hydroxylation:17.01;P13:Oxidation or Hydroxylation:0.00;R16:Oxidation or Hydroxylation:0.00
1-3	5-HCl-P	HCl	5 mL/g	Demineralization	Precipitation	1	3	4	Collagen I, alpha 1	Collagen alpha-1(I) chain OS=Gallus gallus GN=COL1A1 PE=1 SV=3	P02457|CO1A1_CHICK	K.SGEYWIDPNQGC(+57.02)NLDAIK.V	Y	28.15	2078.94	18	1.6	1040.48	2	26.22		F19:530	1	1260	1277	Carbamidomethylation	C12:Carbamidomethylation:1000.00
1-3	5-HCl-P	HCl	5 mL/g	Demineralization	Precipitation	1	3	4	Collagen I, alpha 1	Collagen alpha-1(I) chain OS=Gallus gallus GN=COL1A1 PE=1 SV=3	P02457|CO1A1_CHICK	K.TSRLPIIDLAP(+15.99)MDVGAPDQEFGIDIGPVC(+57.02)FL	Y	30.1	3371.68	31	1.1	1124.9	3	39.21		F19:821	1	1423	1453	Oxidation or Hydroxylation; Carbamidomethylation	P11:Oxidation or Hydroxylation:0.00;C29:Carbamidomethylation:1000.00
1-3	5-HCl-P	HCl	5 mL/g	Demineralization	Precipitation	1	3	4	Collagen I, alpha 1	Collagen alpha-1(I) chain OS=Gallus gallus GN=COL1A1 PE=1 SV=3	P02457|CO1A1_CHICK	K.TSRLPIIDLAPMDVGAPDQEFGIDIGPVC(+57.02)FL	Y	25.32	3355.68	31	1	1119.57	3	40.9		F19:839	1	1423	1453	Carbamidomethylation	C29:Carbamidomethylation:1000.00
1-3	5-HCl-P	HCl	5 mL/g	Demineralization	Precipitation	1	3	4	Collagen I, alpha 1	Collagen alpha-1(I) chain OS=Gallus gallus GN=COL1A1 PE=1 SV=3	P02457|CO1A1_CHICK	K.DGLNGLP(+15.99)GPIGP(+15.99)PGP(+15.99)R.G	Y	32.04	1560.79	16	0.5	781.403	2	48.5		F19:969	1	1142	1157	Oxidation or Hydroxylation	P7:Oxidation or Hydroxylation:22.87;P12:Oxidation or Hydroxylation:8.69;P15:Oxidation or Hydroxylation:0.00
1-3	5-HCl-P	HCl	5 mL/g	Demineralization	Precipitation	2	3	4	Collagen I, alpha 1	Collagen alpha-1(I) chain OS=Gallus gallus GN=COL1A1 PE=1 SV=3	P02457|CO1A1_CHICK	R.DGAAGPKGDRGETGPAGPP(+15.99)GAP(+15.99)GAPGAP(+15.99)GPVGPAGK.N	Y	23.55	3092.49	36	0.5	774.13	4	13.11		F20:120	2	1016	1051	Oxidation or Hydroxylation	P19:Oxidation or Hydroxylation:17.01;P22:Oxidation or Hydroxylation:16.03;P28:Oxidation or Hydroxylation:22.85
1-3	5-HCl-P	HCl	5 mL/g	Demineralization	Precipitation	2	3	4	Collagen I, alpha 1	Collagen alpha-1(I) chain OS=Gallus gallus GN=COL1A1 PE=1 SV=3	P02457|CO1A1_CHICK	R.DGAAGPKGDRGETGPAGPP(+15.99)GAPGAP(+15.99)GAP(+15.99)GPVGPAGK.N	Y	30.8	3092.49	36	1.3	1031.84	3	13.14		F20:121	2	1016	1051	Oxidation or Hydroxylation	P19:Oxidation or Hydroxylation:25.70;P25:Oxidation or Hydroxylation:39.44;P28:Oxidation or Hydroxylation:39.44
1-3	5-HCl-P	HCl	5 mL/g	Demineralization	Precipitation	2	3	4	Collagen I, alpha 1	Collagen alpha-1(I) chain OS=Gallus gallus GN=COL1A1 PE=1 SV=3	P02457|CO1A1_CHICK	R.GAP(+15.99)GPP(+15.99)GAVGAAGKDGEAGAQGPP(+15.99)GPTGPAGER.G	Y	44.19	2855.34	33	1	952.789	3	13.5		F20:132	2	588	620	Oxidation or Hydroxylation	P3:Oxidation or Hydroxylation:18.53;P6:Oxidation or Hydroxylation:10.11;P24:Oxidation or Hydroxylation:92.69
1-3	5-HCl-P	HCl	5 mL/g	Demineralization	Precipitation	2	3	4	Collagen I, alpha 1	Collagen alpha-1(I) chain OS=Gallus gallus GN=COL1A1 PE=1 SV=3	P02457|CO1A1_CHICK	R.GAP(+15.99)GPP(+15.99)GAVGAAGKDGEAGAQGPPGPTGPAGER.G	Y	30.84	2839.35	33	0.6	947.457	3	14.17		F20:148	2	588	620	Oxidation or Hydroxylation	P3:Oxidation or Hydroxylation:26.31;P6:Oxidation or Hydroxylation:17.01
1-3	5-HCl-P	HCl	5 mL/g	Demineralization	Precipitation	2	3	4	Collagen I, alpha 1	Collagen alpha-1(I) chain OS=Gallus gallus GN=COL1A1 PE=1 SV=3	P02457|CO1A1_CHICK	K.GSPGAD(+15.99)GPIGAP(+15.99)GTP(+15.99)GPQGIAGQR.G	Y	30.53	2162.04	24	1.3	1082.03	2	16.43		F20:212	1	924	947	Oxidation or Hydroxylation	D6:Oxidation or Hydroxylation:0.00;P12:Oxidation or Hydroxylation:51.63;P15:Oxidation or Hydroxylation:11.22
1-3	5-HCl-P	HCl	5 mL/g	Demineralization	Precipitation	2	3	4	Collagen I, alpha 1	Collagen alpha-1(I) chain OS=Gallus gallus GN=COL1A1 PE=1 SV=3	P02457|CO1A1_CHICK	R.GLTGPIGPP(+15.99)GPAGAPGD(+15.99)KGEAGPP(+15.99)GPAGPTGAR.G	Y	48.98	2878.42	33	1.8	960.483	3	16.74		F20:222	2	753	785	Oxidation or Hydroxylation	P9:Oxidation or Hydroxylation:63.97;D17:Oxidation or Hydroxylation:58.98;P24:Oxidation or Hydroxylation:67.40
1-3	5-HCl-P	HCl	5 mL/g	Demineralization	Precipitation	2	3	4	Collagen I, alpha 1	Collagen alpha-1(I) chain OS=Gallus gallus GN=COL1A1 PE=1 SV=3	P02457|CO1A1_CHICK	R.GLTGPIGPP(+15.99)GPAGAP(+15.99)GDKGEAGPP(+15.99)GPAGPTGAR.G	Y	53.39	2878.42	33	1.7	960.482	3	16.92		F20:228	4	753	785	Oxidation or Hydroxylation	P9:Oxidation or Hydroxylation:61.69;P15:Oxidation or Hydroxylation:53.43;P24:Oxidation or Hydroxylation:65.46
1-3	5-HCl-P	HCl	5 mL/g	Demineralization	Precipitation	2	3	4	Collagen I, alpha 1	Collagen alpha-1(I) chain OS=Gallus gallus GN=COL1A1 PE=1 SV=3	P02457|CO1A1_CHICK	R.GFSGLQGPP(+15.99)GPP(+15.99)GAP(+15.99)GEQGPSGASGPAGPR.G	Y	48.62	2688.25	30	0.9	1345.13	2	18.75		F20:289	6	1101	1130	Oxidation or Hydroxylation	P9:Oxidation or Hydroxylation:55.73;P12:Oxidation or Hydroxylation:130.57;P15:Oxidation or Hydroxylation:106.36
1-3	5-HCl-P	HCl	5 mL/g	Demineralization	Precipitation	2	3	4	Collagen I, alpha 1	Collagen alpha-1(I) chain OS=Gallus gallus GN=COL1A1 PE=1 SV=3	P02457|CO1A1_CHICK	R.GQAGVMGFPGP(+15.99)K.G	Y	39.97	1160.56	12	0.6	581.29	2	18.95	23200000	F20:296	1	564	575	Oxidation or Hydroxylation	P11:Oxidation or Hydroxylation:0.00
1-3	5-HCl-P	HCl	5 mL/g	Demineralization	Precipitation	2	3	4	Collagen I, alpha 1	Collagen alpha-1(I) chain OS=Gallus gallus GN=COL1A1 PE=1 SV=3	P02457|CO1A1_CHICK	R.GQAGVMGFP(+15.99)GPK.G	Y	39.8	1160.56	12	0.7	581.29	2	19.09	23200000	F20:301	2	564	575	Oxidation or Hydroxylation	P9:Oxidation or Hydroxylation:4.64
1-3	5-HCl-P	HCl	5 mL/g	Demineralization	Precipitation	2	3	4	Collagen I, alpha 1	Collagen alpha-1(I) chain OS=Gallus gallus GN=COL1A1 PE=1 SV=3	P02457|CO1A1_CHICK	R.GFP(+15.99)GLP(+15.99)GPSGEPGK.Q	Y	36.41	1327.64	14	0.8	664.828	2	19.17	42100000	F20:304	2	960	973	Oxidation or Hydroxylation	P3:Oxidation or Hydroxylation:14.02;P6:Oxidation or Hydroxylation:45.01
1-3	5-HCl-P	HCl	5 mL/g	Demineralization	Precipitation	2	3	4	Collagen I, alpha 1	Collagen alpha-1(I) chain OS=Gallus gallus GN=COL1A1 PE=1 SV=3	P02457|CO1A1_CHICK	K.SLSQQIENIR.S	Y	18.07	1186.63	10	0.4	594.323	2	20.83		F20:359	1	1226	1235
1-3	5-HCl-P	HCl	5 mL/g	Demineralization	Precipitation	2	3	4	Collagen I, alpha 1	Collagen alpha-1(I) chain OS=Gallus gallus GN=COL1A1 PE=1 SV=3	P02457|CO1A1_CHICK	K.ALLLQGANEIEIR.A	Y	43.8	1438.81	13	1	720.415	2	26.47		F20:525	3	1376	1388
1-3	5-HCl-P	HCl	5 mL/g	Demineralization	Precipitation	2	3	4	Collagen I, alpha 1	Collagen alpha-1(I) chain OS=Gallus gallus GN=COL1A1 PE=1 SV=3	P02457|CO1A1_CHICK	K.TSRLPIIDLAPMD(+15.99)VGAPDQEFGIDIGPVC(+57.02)FL	Y	25.81	3371.68	31	1.1	1124.9	3	39.2		F20:768	1	1423	1453	Oxidation or Hydroxylation; Carbamidomethylation	D13:Oxidation or Hydroxylation:0.00;C29:Carbamidomethylation:1000.00
1-3	5-HCl-P	HCl	5 mL/g	Demineralization	Precipitation	2	3	4	Collagen I, alpha 1	Collagen alpha-1(I) chain OS=Gallus gallus GN=COL1A1 PE=1 SV=3	P02457|CO1A1_CHICK	R.LPIIDLAPMD(+15.99)VGAPDQEFGIDIGPVC(+57.02)FL	Y	17.54	3027.5	28	1.5	1010.17	3	43.11		F20:805	1	1426	1453	Oxidation or Hydroxylation; Carbamidomethylation	D10:Oxidation or Hydroxylation:0.00;C26:Carbamidomethylation:1000.00
1-3	5-HCl-P	HCl	5 mL/g	Demineralization	Precipitation	1	1	1	Collagen I, alpha 2	Collagen alpha-2(I) chain OS=Gallus gallus GN=COL1A2 PE=4 SV=1	tr|F1P0H9|F1P0H9_CHICK	R.VGP(+15.99)P(+15.99)GPAGITGPP(+15.99)GPP(+15.99)GPAGK.D	Y	20.07	1840.93	21	1.4	921.475	2	15.74		F19:191	3	794	814	Oxidation or Hydroxylation	P3:Oxidation or Hydroxylation:24.24;P4:Oxidation or Hydroxylation:18.53;P13:Oxidation or Hydroxylation:26.02;P16:Oxidation or Hydroxylation:12.28
1-3	5-HCl-P	HCl	5 mL/g	Demineralization	Precipitation	1	1	1	Collagen I, alpha 2	Collagen alpha-2(I) chain OS=Gallus gallus GN=COL1A2 PE=4 SV=1	tr|F1P0H9|F1P0H9_CHICK	R.GLP(+15.99)GAIGAP(+15.99)GPAGGAGDRGEGGPAGPAGPAGAR.G	Y	36.86	2724.33	33	1.1	909.119	3	16		F19:200	5	675	707	Oxidation or Hydroxylation	P3:Oxidation or Hydroxylation:131.34;P9:Oxidation or Hydroxylation:26.31
1-3	5-HCl-P	HCl	5 mL/g	Demineralization	Precipitation	1	1	1	Collagen I, alpha 2	Collagen alpha-2(I) chain OS=Gallus gallus GN=COL1A2 PE=4 SV=1	tr|F1P0H9|F1P0H9_CHICK	R.GLHGEFGVP(+15.99)GPAGPR.G	Y	44.83	1462.73	15	1	732.374	2	16.59		F19:218	4	573	587	Oxidation or Hydroxylation	P9:Oxidation or Hydroxylation:33.18
1-3	5-HCl-P	HCl	5 mL/g	Demineralization	Precipitation	1	1	1	Collagen I, alpha 2	Collagen alpha-2(I) chain OS=Gallus gallus GN=COL1A2 PE=4 SV=1	tr|F1P0H9|F1P0H9_CHICK	K.EGPVGFP(+15.99)GADGR.V	Y	38.09	1173.54	12	0.4	587.778	2	16.67		F19:221	2	464	475	Oxidation or Hydroxylation	P7:Oxidation or Hydroxylation:11.06
1-3	5-HCl-P	HCl	5 mL/g	Demineralization	Precipitation	1	1	1	Collagen I, alpha 2	Collagen alpha-2(I) chain OS=Gallus gallus GN=COL1A2 PE=4 SV=1	tr|F1P0H9|F1P0H9_CHICK	R.VGPIGPAGNRGEPGN(+15.99)IGFP(+15.99)GPK.G	Y	31.99	2119.08	22	0.9	707.368	3	18.29		F19:277	3	476	497	Oxidation or Hydroxylation	N15:Oxidation or Hydroxylation:0.00;P19:Oxidation or Hydroxylation:0.00
1-3	5-HCl-P	HCl	5 mL/g	Demineralization	Precipitation	1	1	1	Collagen I, alpha 2	Collagen alpha-2(I) chain OS=Gallus gallus GN=COL1A2 PE=4 SV=1	tr|F1P0H9|F1P0H9_CHICK	R.VGPIGPAGNRGEP(+15.99)GNIGFPGP(+15.99)K.G	Y	40.11	2119.08	22	0.5	1060.55	2	18.56		F19:286	3	476	497	Oxidation or Hydroxylation	P13:Oxidation or Hydroxylation:11.10;P21:Oxidation or Hydroxylation:0.00
1-3	5-HCl-P	HCl	5 mL/g	Demineralization	Precipitation	1	1	1	Collagen I, alpha 2	Collagen alpha-2(I) chain OS=Gallus gallus GN=COL1A2 PE=4 SV=1	tr|F1P0H9|F1P0H9_CHICK	R.GSDGSAGPTGPAGPIGAAGPP(+15.99)GFP(+15.99)GAPGAK(+15.99).G	Y	31.15	2520.19	30	0.4	841.07	3	20.42		F19:349	1	234	263	Oxidation or Hydroxylation	P21:Oxidation or Hydroxylation:11.77;P24:Oxidation or Hydroxylation:19.86;K30:Oxidation or Hydroxylation:26.08
1-3	5-HCl-P	HCl	5 mL/g	Demineralization	Precipitation	1	1	1	Collagen I, alpha 2	Collagen alpha-2(I) chain OS=Gallus gallus GN=COL1A2 PE=4 SV=1	tr|F1P0H9|F1P0H9_CHICK	R.GSDGSAGPTGPAGPIGAAGPP(+15.99)GFP(+15.99)GAP(+15.99)GAK.G	Y	49.73	2520.19	30	-1.6	1261.1	2	20.46		F19:350	2	234	263	Oxidation or Hydroxylation	P21:Oxidation or Hydroxylation:109.46;P24:Oxidation or Hydroxylation:141.74;P27:Oxidation or Hydroxylation:156.91
1-3	5-HCl-P	HCl	5 mL/g	Demineralization	Precipitation	1	1	1	Collagen I, alpha 2	Collagen alpha-2(I) chain OS=Gallus gallus GN=COL1A2 PE=4 SV=1	tr|F1P0H9|F1P0H9_CHICK	R.GDN(sub P)GPVGPVGPAGAFGPR.G	Y	23.12	1620.8	18	5.6	811.412	2	21.7		F19:390	2	978	995	Mutation
1-3	5-HCl-P	HCl	5 mL/g	Demineralization	Precipitation	1	1	1	Collagen I, alpha 2	Collagen alpha-2(I) chain OS=Gallus gallus GN=COL1A2 PE=4 SV=1	tr|F1P0H9|F1P0H9_CHICK	R.GLP(+15.99)GIAGATGEP(+15.99)GPLGVSGP(+15.99)PGAR.G	Y	47.71	2132.09	24	0.3	1067.05	2	22.37		F19:413	6	882	905	Oxidation or Hydroxylation	P3:Oxidation or Hydroxylation:195.68;P12:Oxidation or Hydroxylation:36.05;P20:Oxidation or Hydroxylation:0.00
1-3	5-HCl-P	HCl	5 mL/g	Demineralization	Precipitation	1	1	1	Collagen I, alpha 2	Collagen alpha-2(I) chain OS=Gallus gallus GN=COL1A2 PE=4 SV=1	tr|F1P0H9|F1P0H9_CHICK	R.GDPGPVGPVGPAGAFGPR.G	Y	50.33	1603.81	18	1.1	802.913	2	22.47		F19:416	4	978	995
1-3	5-HCl-P	HCl	5 mL/g	Demineralization	Precipitation	1	1	1	Collagen I, alpha 2	Collagen alpha-2(I) chain OS=Gallus gallus GN=COL1A2 PE=4 SV=1	tr|F1P0H9|F1P0H9_CHICK	R.GLP(+15.99)GIAGATGEP(+15.99)GPLGVSGPP(+15.99)GAR.G	Y	36.9	2132.09	24	0.6	711.703	3	22.52		F19:418	1	882	905	Oxidation or Hydroxylation	P3:Oxidation or Hydroxylation:90.32;P12:Oxidation or Hydroxylation:8.22;P21:Oxidation or Hydroxylation:0.00
1-3	5-HCl-P	HCl	5 mL/g	Demineralization	Precipitation	1	1	1	Collagen I, alpha 2	Collagen alpha-2(I) chain OS=Gallus gallus GN=COL1A2 PE=4 SV=1	tr|F1P0H9|F1P0H9_CHICK	R.GLP(+15.99)GIAGATGEP(+15.99)GPLGVSGPPGAR(+15.99).G	Y	47.05	2132.09	24	1.3	1067.05	2	23.02		F19:434	3	882	905	Oxidation or Hydroxylation	P3:Oxidation or Hydroxylation:195.68;P12:Oxidation or Hydroxylation:36.05;R24:Oxidation or Hydroxylation:0.00
1-3	5-HCl-P	HCl	5 mL/g	Demineralization	Precipitation	1	1	1	Collagen I, alpha 2	Collagen alpha-2(I) chain OS=Gallus gallus GN=COL1A2 PE=4 SV=1	tr|F1P0H9|F1P0H9_CHICK	R.GLP(+15.99)GIAGATGEPGPLGVSGPP(+15.99)GAR.G	Y	44.09	2116.09	24	1	1059.05	2	23.63		F19:453	1	882	905	Oxidation or Hydroxylation	P3:Oxidation or Hydroxylation:140.79;P21:Oxidation or Hydroxylation:0.00
1-3	5-HCl-P	HCl	5 mL/g	Demineralization	Precipitation	1	1	1	Collagen I, alpha 2	Collagen alpha-2(I) chain OS=Gallus gallus GN=COL1A2 PE=4 SV=1	tr|F1P0H9|F1P0H9_CHICK	K.AADFGPGPMGLMGPR.G	Y	51.23	1472.69	15	1.2	737.353	2	26.94		F19:551	3	84	98
1-3	5-HCl-P	HCl	5 mL/g	Demineralization	Precipitation	1	1	1	Collagen I, alpha 2	Collagen alpha-2(I) chain OS=Gallus gallus GN=COL1A2 PE=4 SV=1	tr|F1P0H9|F1P0H9_CHICK	A.ADFGPGPMGLMGPR.G	Y	25.49	1401.65	14	0.6	701.834	2	27.15		F19:558	1	85	98
1-3	5-HCl-P	HCl	5 mL/g	Demineralization	Precipitation	1	1	1	Collagen I, alpha 2	Collagen alpha-2(I) chain OS=Gallus gallus GN=COL1A2 PE=4 SV=1	tr|F1P0H9|F1P0H9_CHICK	K.TLNNQIETLLTPEGSK.K	Y	33.24	1756.92	16	1.8	879.469	2	28.11		F19:581	1	1136	1151
1-3	5-HCl-P	HCl	5 mL/g	Demineralization	Precipitation	1	1	1	Collagen I, alpha 2	Collagen alpha-2(I) chain OS=Gallus gallus GN=COL1A2 PE=4 SV=1	tr|F1P0H9|F1P0H9_CHICK	R.FTFSVLVDGC(+57.02)SK.K	Y	30.46	1358.65	12	0.9	680.335	2	28.62		F19:593	1	1305	1316	Carbamidomethylation	C10:Carbamidomethylation:1000.00
1-3	5-HCl-P	HCl	5 mL/g	Demineralization	Precipitation	1	1	1	Collagen I, alpha 2	Collagen alpha-2(I) chain OS=Gallus gallus GN=COL1A2 PE=4 SV=1	tr|F1P0H9|F1P0H9_CHICK	A.Q(-17.03)YDPSK(+15.99)AADFGPGPMGLMGPR.G	Y	32.64	2189.99	21	0.5	1096	2	29.07		F19:602	2	78	98	Pyro-glu from Q; Oxidation or Hydroxylation	Q1:Pyro-glu from Q:1000.00;K6:Oxidation or Hydroxylation:22.85
1-3	5-HCl-P	HCl	5 mL/g	Demineralization	Precipitation	1	1	1	Collagen I, alpha 2	Collagen alpha-2(I) chain OS=Gallus gallus GN=COL1A2 PE=4 SV=1	tr|F1P0H9|F1P0H9_CHICK	R.DGEDGP(+15.99)P(+15.99)GPPGP(+15.99)PGPPGLGGNFAAQYDPSKAADFGPGPMGLMGPR.G	Y	19.25	4346.96	45	9.1	1087.76	4	29.33		F19:609	1	54	98	Oxidation or Hydroxylation	P6:Oxidation or Hydroxylation:0.00;P7:Oxidation or Hydroxylation:0.00;P12:Oxidation or Hydroxylation:0.00
1-3	5-HCl-P	HCl	5 mL/g	Demineralization	Precipitation	1	1	1	Collagen I, alpha 2	Collagen alpha-2(I) chain OS=Gallus gallus GN=COL1A2 PE=4 SV=1	tr|F1P0H9|F1P0H9_CHICK	R.LSHPEWSSGFYWIDPNQGC(+57.02)TADAIR.A	Y	31.72	2906.31	25	0.4	969.777	3	29.77		F19:619	1	1163	1187	Carbamidomethylation	C19:Carbamidomethylation:1000.00
1-3	5-HCl-P	HCl	5 mL/g	Demineralization	Precipitation	1	1	1	Collagen I, alpha 2	Collagen alpha-2(I) chain OS=Gallus gallus GN=COL1A2 PE=4 SV=1	tr|F1P0H9|F1P0H9_CHICK	R.LPILDIAPLDIGGADQEFGLHIGPVC(+57.02)FK	Y	23.52	3004.57	28	0.7	1002.53	3	37.58		F19:797	1	1336	1363	Carbamidomethylation	C26:Carbamidomethylation:1000.00
1-3	5-HCl-P	HCl	5 mL/g	Demineralization	Precipitation	2	1	1	Collagen I, alpha 2	Collagen alpha-2(I) chain OS=Gallus gallus GN=COL1A2 PE=4 SV=1	tr|F1P0H9|F1P0H9_CHICK	R.GASGPVGAKGPN(+.98)GDAGRP(+15.99)GEPGLMGP(+15.99)R.G	Y	39.44	2491.19	27	0.2	623.804	4	14.49		F20:156	1	423	449	Deamidation (NQ); Oxidation or Hydroxylation	N12:Deamidation (NQ):1000.00;P18:Oxidation or Hydroxylation:14.02;P26:Oxidation or Hydroxylation:0.00
1-3	5-HCl-P	HCl	5 mL/g	Demineralization	Precipitation	2	1	1	Collagen I, alpha 2	Collagen alpha-2(I) chain OS=Gallus gallus GN=COL1A2 PE=4 SV=1	tr|F1P0H9|F1P0H9_CHICK	R.GPP(+15.99)GP(+15.99)SGPPGKDGRN(+.98)GLP(+15.99)GPIGPAGVR.G	Y	18.3	2509.27	27	1	628.325	4	15.62		F20:186	1	1053	1079	Oxidation or Hydroxylation; Deamidation (NQ)	P3:Oxidation or Hydroxylation:17.01;P5:Oxidation or Hydroxylation:0.00;N15:Deamidation (NQ):1000.00;P18:Oxidation or Hydroxylation:42.68
1-3	5-HCl-P	HCl	5 mL/g	Demineralization	Precipitation	2	1	1	Collagen I, alpha 2	Collagen alpha-2(I) chain OS=Gallus gallus GN=COL1A2 PE=4 SV=1	tr|F1P0H9|F1P0H9_CHICK	R.GPP(+15.99)GPSGPPGKDGRN(+.98)GLP(+15.99)GPIGPAGVR.G	Y	35.69	2493.27	27	0.7	624.326	4	16.27		F20:207	2	1053	1079	Oxidation or Hydroxylation; Deamidation (NQ)	P3:Oxidation or Hydroxylation:14.02;N15:Deamidation (NQ):1000.00;P18:Oxidation or Hydroxylation:45.01
1-3	5-HCl-P	HCl	5 mL/g	Demineralization	Precipitation	2	1	1	Collagen I, alpha 2	Collagen alpha-2(I) chain OS=Gallus gallus GN=COL1A2 PE=4 SV=1	tr|F1P0H9|F1P0H9_CHICK	R.GLP(+15.99)GAIGAPGP(+15.99)AGGAGDRGEGGPAGPAGPAGAR.G	Y	24.28	2724.33	33	-0.1	1363.17	2	16.29		F20:208	1	675	707	Oxidation or Hydroxylation	P3:Oxidation or Hydroxylation:0.00;P11:Oxidation or Hydroxylation:0.00
1-3	5-HCl-P	HCl	5 mL/g	Demineralization	Precipitation	2	1	1	Collagen I, alpha 2	Collagen alpha-2(I) chain OS=Gallus gallus GN=COL1A2 PE=4 SV=1	tr|F1P0H9|F1P0H9_CHICK	K.GEIGPAGNVGPTGPAGPR.G	Y	48.97	1602.81	18	0.8	802.414	2	16.66		F20:219	2	264	281
1-3	5-HCl-P	HCl	5 mL/g	Demineralization	Precipitation	2	1	1	Collagen I, alpha 2	Collagen alpha-2(I) chain OS=Gallus gallus GN=COL1A2 PE=4 SV=1	tr|F1P0H9|F1P0H9_CHICK	R.GLP(+15.99)GESGAVGPAGPIGSR.G	Y	42.81	1593.81	18	1.4	797.914	2	17.75		F20:255	2	591	608	Oxidation or Hydroxylation	P3:Oxidation or Hydroxylation:112.87
1-3	5-HCl-P	HCl	5 mL/g	Demineralization	Precipitation	2	1	1	Collagen I, alpha 2	Collagen alpha-2(I) chain OS=Gallus gallus GN=COL1A2 PE=4 SV=1	tr|F1P0H9|F1P0H9_CHICK	R.GLP(+15.99)GESGAVGP(+31.99)AGPIGSR.G	Y	31.48	1625.8	18	0.4	813.908	2	17.91		F20:261	1	591	608	Oxidation or Hydroxylation; Dihydroxy	P3:Oxidation or Hydroxylation:26.33;P11:Dihydroxy:12.66
1-3	5-HCl-P	HCl	5 mL/g	Demineralization	Precipitation	2	1	1	Collagen I, alpha 2	Collagen alpha-2(I) chain OS=Gallus gallus GN=COL1A2 PE=4 SV=1	tr|F1P0H9|F1P0H9_CHICK	R.GDAGPP(+15.99)GMTGFPGAAGR(+15.99).V	Y	29.81	1546.68	17	0.5	774.349	2	18.03		F20:265	2	777	793	Oxidation or Hydroxylation	P6:Oxidation or Hydroxylation:17.01;R17:Oxidation or Hydroxylation:0.00
1-3	5-HCl-P	HCl	5 mL/g	Demineralization	Precipitation	2	1	1	Collagen I, alpha 2	Collagen alpha-2(I) chain OS=Gallus gallus GN=COL1A2 PE=4 SV=1	tr|F1P0H9|F1P0H9_CHICK	K.GETGPAGPP(+15.99)GFQGLP(+15.99)GPSGPAGEAGKP(+15.99)GER.G	Y	52.28	2776.31	30	1.1	926.443	3	18.11		F20:268	4	543	572	Oxidation or Hydroxylation	P9:Oxidation or Hydroxylation:67.69;P15:Oxidation or Hydroxylation:69.91;P27:Oxidation or Hydroxylation:57.10
1-3	5-HCl-P	HCl	5 mL/g	Demineralization	Precipitation	2	1	1	Collagen I, alpha 2	Collagen alpha-2(I) chain OS=Gallus gallus GN=COL1A2 PE=4 SV=1	tr|F1P0H9|F1P0H9_CHICK	R.NGLP(+15.99)GPIGPAGVR.G	Y	32.02	1219.67	13	1.1	610.842	2	18.27		F20:273	2	1067	1079	Oxidation or Hydroxylation	P4:Oxidation or Hydroxylation:32.28
1-3	5-HCl-P	HCl	5 mL/g	Demineralization	Precipitation	2	1	1	Collagen I, alpha 2	Collagen alpha-2(I) chain OS=Gallus gallus GN=COL1A2 PE=4 SV=1	tr|F1P0H9|F1P0H9_CHICK	R.VGPIGPAGNRGEP(+15.99)GNIGFP(+15.99)GPK.G	Y	33.58	2119.08	22	1.1	707.368	3	18.35		F20:276	1	476	497	Oxidation or Hydroxylation	P13:Oxidation or Hydroxylation:8.22;P19:Oxidation or Hydroxylation:0.00
1-3	5-HCl-P	HCl	5 mL/g	Demineralization	Precipitation	2	1	1	Collagen I, alpha 2	Collagen alpha-2(I) chain OS=Gallus gallus GN=COL1A2 PE=4 SV=1	tr|F1P0H9|F1P0H9_CHICK	K.GAAGLP(+15.99)GVAGAP(+15.99)GLPGP(+15.99)R.G	Y	42.39	1561.82	18	1.2	781.919	2	19.07	190000000	F20:300	4	309	326	Oxidation or Hydroxylation	P6:Oxidation or Hydroxylation:181.07;P12:Oxidation or Hydroxylation:53.53;P17:Oxidation or Hydroxylation:0.00
1-3	5-HCl-P	HCl	5 mL/g	Demineralization	Precipitation	2	1	1	Collagen I, alpha 2	Collagen alpha-2(I) chain OS=Gallus gallus GN=COL1A2 PE=4 SV=1	tr|F1P0H9|F1P0H9_CHICK	K.GP(+15.99)KGETGPTGAIGPIGASGPP(+15.99)GPVGAAGPAGPR.G	Y	53.15	2836.45	33	1.3	946.491	3	19.12		F20:302	3	744	776	Oxidation or Hydroxylation	P2:Oxidation or Hydroxylation:0.00;P21:Oxidation or Hydroxylation:17.01
1-3	5-HCl-P	HCl	5 mL/g	Demineralization	Precipitation	2	1	1	Collagen I, alpha 2	Collagen alpha-2(I) chain OS=Gallus gallus GN=COL1A2 PE=4 SV=1	tr|F1P0H9|F1P0H9_CHICK	R.GLPGESGAVGPAGPIGSR.G	Y	28.71	1577.82	18	0.4	789.916	2	19.2		F20:305	1	591	608
1-3	5-HCl-P	HCl	5 mL/g	Demineralization	Precipitation	2	1	1	Collagen I, alpha 2	Collagen alpha-2(I) chain OS=Gallus gallus GN=COL1A2 PE=4 SV=1	tr|F1P0H9|F1P0H9_CHICK	K.GPKGETGPTGAIGPIGASGPP(+15.99)GPVGAAGPAGPR.G	Y	52.93	2820.45	33	1.1	941.159	3	19.23		F20:306	3	744	776	Oxidation or Hydroxylation	P21:Oxidation or Hydroxylation:27.96
1-3	5-HCl-P	HCl	5 mL/g	Demineralization	Precipitation	2	1	1	Collagen I, alpha 2	Collagen alpha-2(I) chain OS=Gallus gallus GN=COL1A2 PE=4 SV=1	tr|F1P0H9|F1P0H9_CHICK	K.GAAGLP(+15.99)GVAGAP(+15.99)GLP(+15.99)GPR.G	Y	15.09	1561.82	18	1	781.919	2	19.79		F20:325	1	309	326	Oxidation or Hydroxylation	P6:Oxidation or Hydroxylation:34.77;P12:Oxidation or Hydroxylation:16.28;P15:Oxidation or Hydroxylation:0.00
1-3	5-HCl-P	HCl	5 mL/g	Demineralization	Precipitation	2	1	1	Collagen I, alpha 2	Collagen alpha-2(I) chain OS=Gallus gallus GN=COL1A2 PE=4 SV=1	tr|F1P0H9|F1P0H9_CHICK	R.N(+.98)GLP(+15.99)GPIGPAGVR.G	Y	36.55	1220.65	13	0.8	611.333	2	20.77		F20:357	3	1067	1079	Deamidation (NQ); Oxidation or Hydroxylation	N1:Deamidation (NQ):1000.00;P4:Oxidation or Hydroxylation:60.92
1-3	5-HCl-P	HCl	5 mL/g	Demineralization	Precipitation	2	1	1	Collagen I, alpha 2	Collagen alpha-2(I) chain OS=Gallus gallus GN=COL1A2 PE=4 SV=1	tr|F1P0H9|F1P0H9_CHICK	K.GETGPTGAIGPIGASGPP(+15.99)GPVGAAGPAGPR.G	Y	47.4	2538.28	30	1.3	1270.15	2	21.53		F20:383	6	747	776	Oxidation or Hydroxylation	P18:Oxidation or Hydroxylation:75.74
1-3	5-HCl-P	HCl	5 mL/g	Demineralization	Precipitation	2	1	1	Collagen I, alpha 2	Collagen alpha-2(I) chain OS=Gallus gallus GN=COL1A2 PE=4 SV=1	tr|F1P0H9|F1P0H9_CHICK	R.GSDGSAGPTGPAGPIGAAGPP(+15.99)GFPGAP(+15.99)GAK.G	Y	44.51	2504.19	30	1.7	1253.11	2	21.68		F20:387	1	234	263	Oxidation or Hydroxylation	P21:Oxidation or Hydroxylation:100.91;P27:Oxidation or Hydroxylation:111.11
1-3	5-HCl-P	HCl	5 mL/g	Demineralization	Precipitation	2	1	1	Collagen I, alpha 2	Collagen alpha-2(I) chain OS=Gallus gallus GN=COL1A2 PE=4 SV=1	tr|F1P0H9|F1P0H9_CHICK	R.GDP(+15.99)GPVGPVGPAGAFGPR.G	Y	50.97	1619.81	18	0.7	810.911	2	21.87		F20:390	4	978	995	Oxidation or Hydroxylation	P3:Oxidation or Hydroxylation:10.11
1-3	5-HCl-P	HCl	5 mL/g	Demineralization	Precipitation	2	1	1	Collagen I, alpha 2	Collagen alpha-2(I) chain OS=Gallus gallus GN=COL1A2 PE=4 SV=1	tr|F1P0H9|F1P0H9_CHICK	R.GFP(+15.99)GTP(+15.99)GLP(+15.99)GFK.G	Y	34.54	1221.6	12	0.6	611.809	2	21.97		F20:394	4	165	176	Oxidation or Hydroxylation	P3:Oxidation or Hydroxylation:20.92;P6:Oxidation or Hydroxylation:29.96;P9:Oxidation or Hydroxylation:0.00
1-3	5-HCl-P	HCl	5 mL/g	Demineralization	Precipitation	2	1	1	Collagen I, alpha 2	Collagen alpha-2(I) chain OS=Gallus gallus GN=COL1A2 PE=4 SV=1	tr|F1P0H9|F1P0H9_CHICK	R.GDPGPVGPVGPAGAFGP(+15.99)R.G	Y	27.87	1619.81	18	0.3	810.91	2	22.53		F20:413	1	978	995	Oxidation or Hydroxylation	P17:Oxidation or Hydroxylation:0.00
1-3	5-HCl-P	HCl	5 mL/g	Demineralization	Precipitation	2	1	1	Collagen I, alpha 2	Collagen alpha-2(I) chain OS=Gallus gallus GN=COL1A2 PE=4 SV=1	tr|F1P0H9|F1P0H9_CHICK	R.GLP(+15.99)GIAGATGEPGPLGVSGPPGAR(+15.99).G	Y	42.1	2116.09	24	1.5	1059.05	2	23.57		F20:444	3	882	905	Oxidation or Hydroxylation	P3:Oxidation or Hydroxylation:159.26;R24:Oxidation or Hydroxylation:0.00
1-3	5-HCl-P	HCl	5 mL/g	Demineralization	Precipitation	2	1	1	Collagen I, alpha 2	Collagen alpha-2(I) chain OS=Gallus gallus GN=COL1A2 PE=4 SV=1	tr|F1P0H9|F1P0H9_CHICK	R.GLP(+15.99)GIAGATGEPGPLGVSGP(+15.99)PGAR.G	Y	24.03	2116.09	24	0.2	1059.05	2	23.93		F20:456	1	882	905	Oxidation or Hydroxylation	P3:Oxidation or Hydroxylation:74.73;P20:Oxidation or Hydroxylation:0.00
1-3	5-HCl-P	HCl	5 mL/g	Demineralization	Precipitation	2	1	1	Collagen I, alpha 2	Collagen alpha-2(I) chain OS=Gallus gallus GN=COL1A2 PE=4 SV=1	tr|F1P0H9|F1P0H9_CHICK	K.AADFGPGPM(+15.99)GLM(+15.99)GPR.G	Y	47.42	1504.68	15	0.5	753.348	2	26.86		F20:536	2	84	98	Oxidation (M)	M9:Oxidation (M):1000.00;M12:Oxidation (M):1000.00
1-3	5-HCl-P	HCl	5 mL/g	Demineralization	Precipitation	2	1	1	Collagen I, alpha 2	Collagen alpha-2(I) chain OS=Gallus gallus GN=COL1A2 PE=4 SV=1	tr|F1P0H9|F1P0H9_CHICK	A.DFGPGPMGLMGPR.G	Y	38.89	1330.62	13	1.6	666.317	2	27.65		F20:555	2	86	98
1-3	5-HCl-P	HCl	5 mL/g	Demineralization	Precipitation	2	1	1	Collagen I, alpha 2	Collagen alpha-2(I) chain OS=Gallus gallus GN=COL1A2 PE=4 SV=1	tr|F1P0H9|F1P0H9_CHICK	A.DFGPGP(+15.99)MGLM(+15.99)GPR.G	Y	37.61	1362.61	13	0.6	682.311	2	27.8		F20:559	1	86	98	Oxidation or Hydroxylation; Oxidation (M)	P6:Oxidation or Hydroxylation:43.88;M10:Oxidation (M):32.69
1-3	5-HCl-P	HCl	5 mL/g	Demineralization	Precipitation	2	1	1	Collagen I, alpha 2	Collagen alpha-2(I) chain OS=Gallus gallus GN=COL1A2 PE=4 SV=1	tr|F1P0H9|F1P0H9_CHICK	R.TNKPSRLPILDIAPLDIGGADQEFGLHIGPVC(+57.02)FK	Y	53.49	3687.94	34	1	922.994	4	33.43		F20:675	4	1330	1363	Carbamidomethylation	C32:Carbamidomethylation:1000.00
1-3	5-HCl-P	HCl	5 mL/g	Demineralization	Precipitation	2	1	1	Collagen I, alpha 2	Collagen alpha-2(I) chain OS=Gallus gallus GN=COL1A2 PE=4 SV=1	tr|F1P0H9|F1P0H9_CHICK	R.TNKPSRLPILDIAPLDIGGADQ(+.98)EFGLHIGPVC(+57.02)FK	Y	24.39	3688.93	34	6.3	738.798	5	33.65		F20:682	1	1330	1363	Deamidation (NQ); Carbamidomethylation	Q22:Deamidation (NQ):0.00;C32:Carbamidomethylation:1000.00
1-3	5-HCl-P	HCl	5 mL/g	Demineralization	Precipitation	1	9	260	Collagen V, alpha 1	Alpha 1 (V) collagen OS=Gallus gallus PE=2 SV=1	tr|Q9IAU4|Q9IAU4_CHICK	K.VEQVPIVDIMFNDFGEASQK.F	Y	42.91	2265.1	20	-0.2	756.04	3	37.19		F19:791	1	1804	1823
1-3	5-HCl-P	HCl	5 mL/g	Demineralization	Precipitation	2	9	260	Collagen V, alpha 1	Alpha 1 (V) collagen OS=Gallus gallus PE=2 SV=1	tr|Q9IAU4|Q9IAU4_CHICK	K.LLSYVDSDGNPIGVVQMTFLR.L	Y	43.93	2323.19	21	0.6	1162.6	2	35.77		F20:725	3	1709	1729
1-3	5-HCl-P	HCl	5 mL/g	Demineralization	Precipitation	2	9	260	Collagen V, alpha 1	Alpha 1 (V) collagen OS=Gallus gallus PE=2 SV=1	tr|Q9IAU4|Q9IAU4_CHICK	K.FGFEVGPAC(+57.02)FMG	Y	35.68	1317.55	12	1	659.784	2	35.83		F20:726	1	1824	1835	Carbamidomethylation	C9:Carbamidomethylation:1000.00
1-3	5-HCl-P	HCl	5 mL/g	Demineralization	Precipitation	2	9	260	Collagen V, alpha 1	Alpha 1 (V) collagen OS=Gallus gallus PE=2 SV=1	tr|Q9IAU4|Q9IAU4_CHICK	K.TVLEINTPKVEQVPIVDIMFNDFGEASQK.F	Y	31.72	3260.66	29	1.4	1087.9	3	36.19		F20:734	2	1795	1823
1-3	5-HCl-P	HCl	5 mL/g	Demineralization	Precipitation	2	9	260	Collagen V, alpha 1	Alpha 1 (V) collagen OS=Gallus gallus PE=2 SV=1	tr|Q9IAU4|Q9IAU4_CHICK	R.ILDEEVFEGDIQQLLIVADPR.A	Y	30.93	2411.26	21	0.3	804.76	3	39.25		F20:769	1	208	228
1-3	5-HCl-P	HCl	5 mL/g	Demineralization	Precipitation	1	27	275	Collagen V, alpha 2	Uncharacterized protein OS=Gallus gallus GN=COL5A2 PE=4 SV=2	tr|F1P563|F1P563_CHICK	R.GSQFVYGDTAVTQMTFLR.L	Y	40.88	2019.97	18	1.1	1010.99	2	30.19		F19:629	1	364	381
1-3	5-HCl-P	HCl	5 mL/g	Demineralization	Precipitation	1	33	43	Collagen IX, alpha 1	Alpha-1 type XI collagen (Fragment) OS=Gallus gallus PE=2 SV=1	tr|Q90796|Q90796_CHICK	K.FGFEVGPVC(+57.02)FLG	Y	35.83	1327.63	12	1	664.822	2	39.47		F19:824	1	877	888	Carbamidomethylation	C9:Carbamidomethylation:1000.00
1-3	5-HCl-P	HCl	5 mL/g	Demineralization	Precipitation	1	21	15	Cystatin	Cystatin OS=Gallus gallus PE=1 SV=2	P01038|CYT_CHICK	R.LLGAPVPVDENDEGLQR.A	Y	43.7	1820.93	17	0.9	911.471	2	22.55		F19:419	2	30	46
1-3	5-HCl-P	HCl	5 mL/g	Demineralization	Precipitation	1	21	15	Cystatin	Cystatin OS=Gallus gallus PE=1 SV=2	P01038|CYT_CHICK	K.YILQVEIGR.T	Y	32.55	1089.62	9	1	545.817	2	25.04		F19:495	1	83	91
1-3	5-HCl-P	HCl	5 mL/g	Demineralization	Precipitation	1	21	15	Cystatin	Cystatin OS=Gallus gallus PE=1 SV=2	P01038|CYT_CHICK	K.YTTC(+57.02)TFVVYSIPWLNQIK.L	Y	39.68	2232.13	18	0.7	1117.07	2	36.41		F19:779	1	115	132	Carbamidomethylation	C4:Carbamidomethylation:1000.00
1-3	5-HCl-P	HCl	5 mL/g	Demineralization	Precipitation	1	7	10	Decorin	Decorin OS=Gallus gallus GN=DCN PE=1 SV=1	P28675|PGS2_CHICK	Y.WEIQPSAFR.C	Y	16.01	1132.57	9	0.5	567.291	2	24.99		F19:493	1	335	343
1-3	5-HCl-P	HCl	5 mL/g	Demineralization	Precipitation	1	7	10	Decorin	Decorin OS=Gallus gallus GN=DCN PE=1 SV=1	P28675|PGS2_CHICK	K.DLPPDTTLLDLQNNK.I	Y	36.73	1695.87	15	0.3	848.942	2	26.11		F19:527	2	76	90
1-3	5-HCl-P	HCl	5 mL/g	Demineralization	Precipitation	1	7	10	Decorin	Decorin OS=Gallus gallus GN=DCN PE=1 SV=1	P28675|PGS2_CHICK	K.IDAEGLSGLTNLAK.L	Y	41.38	1400.75	14	1.1	701.384	2	26.4		F19:535	1	234	247
1-3	5-HCl-P	HCl	5 mL/g	Demineralization	Precipitation	1	7	10	Decorin	Decorin OS=Gallus gallus GN=DCN PE=1 SV=1	P28675|PGS2_CHICK	R.KAVFN(+.98)GLNQVIVL.E	Y	20.78	1414.82	13	1.4	708.417	2	30.8		F19:646	2	165	177	Deamidation (NQ)	N5:Deamidation (NQ):4.52
1-3	5-HCl-P	HCl	5 mL/g	Demineralization	Precipitation	1	7	10	Decorin	Decorin OS=Gallus gallus GN=DCN PE=1 SV=1	P28675|PGS2_CHICK	K.AVFN(+.98)GLNQVIVL.E	Y	26.85	1286.72	12	1.3	644.37	2	35.56		F19:759	1	166	177	Deamidation (NQ)	N4:Deamidation (NQ):56.34
1-3	5-HCl-P	HCl	5 mL/g	Demineralization	Precipitation	1	7	10	Decorin	Decorin OS=Gallus gallus GN=DCN PE=1 SV=1	P28675|PGS2_CHICK	K.ATYSGVSLFSNPVQYWEIQPSAFR.C	Y	22.48	2746.34	24	0.4	916.454	3	35.73		F19:764	1	320	343
1-3	5-HCl-P	HCl	5 mL/g	Demineralization	Precipitation	2	7	10	Decorin	Decorin OS=Gallus gallus GN=DCN PE=1 SV=1	P28675|PGS2_CHICK	K.ISPAAFAPLK.K	Y	41.22	1013.59	10	0.3	507.803	2	23.66		F20:447	2	118	127
1-3	5-HCl-P	HCl	5 mL/g	Demineralization	Precipitation	2	7	10	Decorin	Decorin OS=Gallus gallus GN=DCN PE=1 SV=1	P28675|PGS2_CHICK	K.IASIGINDFC(+57.02)PLGYNTK.K	Y	25.84	1881.93	17	3.6	941.975	2	29.21		F20:586	1	302	318	Carbamidomethylation	C10:Carbamidomethylation:1000.00
1-3	5-HCl-P	HCl	5 mL/g	Demineralization	Precipitation	2	7	10	Decorin	Decorin OS=Gallus gallus GN=DCN PE=1 SV=1	P28675|PGS2_CHICK	R.KAVFNGLNQVIVL.E	Y	18.18	1413.83	13	0.6	707.925	2	30.4		F20:608	1	165	177
1-3	5-HCl-P	HCl	5 mL/g	Demineralization	Precipitation	1	16	12	Extracellular Fatty Acid-binding protein	Uncharacterized protein OS=Gallus gallus GN=LCN8 PE=3 SV=2	tr|E1C0K1|E1C0K1_CHICK	K.TSDDGEVYYSEEAEKTVEVLDTDYK.S	Y	38.98	2884.27	25	0.5	962.43	3	29.59		F19:615	1	90	114
1-3	5-HCl-P	HCl	5 mL/g	Demineralization	Precipitation	1	16	12	Extracellular Fatty Acid-binding protein	Uncharacterized protein OS=Gallus gallus GN=LCN8 PE=3 SV=2	tr|E1C0K1|E1C0K1_CHICK	K.WYIVALASNTDFFLR.E	Y	50.98	1814.94	15	1.6	908.476	2	37.4		F19:795	2	34	48
1-3	5-HCl-P	HCl	5 mL/g	Demineralization	Precipitation	2	16	12	Extracellular Fatty Acid-binding protein	Uncharacterized protein OS=Gallus gallus GN=LCN8 PE=3 SV=2	tr|E1C0K1|E1C0K1_CHICK	R.EVSPTAMAIFR.K	Y	30.52	1220.62	11	0.1	611.318	2	26.63		F20:530	1	141	151
1-3	5-HCl-P	HCl	5 mL/g	Demineralization	Precipitation	2	16	12	Extracellular Fatty Acid-binding protein	Uncharacterized protein OS=Gallus gallus GN=LCN8 PE=3 SV=2	tr|E1C0K1|E1C0K1_CHICK	R.ISFLGEDELEVSYAAPSPK.G	Y	41.36	2051.01	19	1.4	1026.51	2	28.98		F20:583	2	60	78
1-3	5-HCl-P	HCl	5 mL/g	Demineralization	Precipitation	1	10	77	Gallinacin-7	Gallinacin-7 OS=Gallus gallus GN=GAL7 PE=2 SV=1	Q6QLR2|GLL7_CHICK	R.RPYYWIGTC(+57.02)NNGIGSC(+57.02)C(+57.02)AR.G	Y	23.03	2304	19	0.1	769.007	3	21.88		F19:396	1	45	63	Carbamidomethylation	C9:Carbamidomethylation:1000.00;C16:Carbamidomethylation:1000.00;C17:Carbamidomethylation:1000.00
1-3	5-HCl-P	HCl	5 mL/g	Demineralization	Precipitation	1	10	77	Gallinacin-7	Gallinacin-7 OS=Gallus gallus GN=GAL7 PE=2 SV=1	Q6QLR2|GLL7_CHICK	R.NGIC(+57.02)FPGIC(+57.02)R.R	Y	42.29	1192.55	10	0.7	597.282	2	24.19		F19:470	4	35	44	Carbamidomethylation	C4:Carbamidomethylation:1000.00;C9:Carbamidomethylation:1000.00
1-3	5-HCl-P	HCl	5 mL/g	Demineralization	Precipitation	1	10	77	Gallinacin-7	Gallinacin-7 OS=Gallus gallus GN=GAL7 PE=2 SV=1	Q6QLR2|GLL7_CHICK	G.Q(-17.03)PFIPRPIDTC(+57.02)R.L	Y	28.47	1481.74	12	1.2	741.881	2	25.13		F19:498	3	21	32	Pyro-glu from Q; Carbamidomethylation	Q1:Pyro-glu from Q:1000.00;C11:Carbamidomethylation:1000.00
1-3	5-HCl-P	HCl	5 mL/g	Demineralization	Precipitation	1	32	2187	Gelsolin	Gelsolin OS=Gallus gallus GN=GSN PE=2 SV=1	O93510|GELS_CHICK	K.NLYGDFFTGDSYLVLNTIR.Q	Y	37.66	2207.09	19	2	1104.55	2	36.46		F19:780	1	80	98
1-3	5-HCl-P	HCl	5 mL/g	Demineralization	Precipitation	1	29	45	Hemoglobin A	Hemoglobin subunit alpha-A OS=Gallus gallus GN=HBAA PE=1 SV=2	P01994|HBA_CHICK	K.VVAALIEAANHIDDIAGTLSK.L	Y	20.41	2120.15	21	1.2	707.724	3	33.75		F19:718	1	63	83
1-3	5-HCl-P	HCl	5 mL/g	Demineralization	Precipitation	1	22	2183	Heterochromatin Associated protein	Heterochromatin-associated protein MENT OS=Gallus gallus GN=SERPINB10 PE=1 SV=1	O73790|SPB10_CHICK	R.ELSM(+15.99)FILLPDDIKDGTTGLEQLER.E	Y	29.37	2748.39	24	1	917.138	3	32.7		F19:689	1	253	276	Oxidation (M)	M4:Oxidation (M):1000.00
1-3	5-HCl-P	HCl	5 mL/g	Demineralization	Precipitation	2	22	2183	Heterochromatin Associated protein	Heterochromatin-associated protein MENT OS=Gallus gallus GN=SERPINB10 PE=1 SV=1	O73790|SPB10_CHICK	R.ELSMFILLPDDIKDGTTGLEQLER.E	Y	41.62	2732.39	24	0.9	911.806	3	35.2		F20:716	2	253	276
1-3	5-HCl-P	HCl	5 mL/g	Demineralization	Precipitation	1	12	28	Histone 2A	Histone H2A-III OS=Gallus gallus PE=1 SV=2	P35062|H2A3_CHICK	R.AGLQFPVGR.V	Y	35.14	943.524	9	0.4	472.769	2	21.73		F19:391	3	22	30
1-3	5-HCl-P	HCl	5 mL/g	Demineralization	Precipitation	1	12	28	Histone 2A	Histone H2A-III OS=Gallus gallus PE=1 SV=2	P35062|H2A3_CHICK	K.VTIAQGGVLPNIQA.V	Y	23.99	1379.78	14	0.9	690.896	2	27.78		F19:571	2	101	114
1-3	5-HCl-P	HCl	5 mL/g	Demineralization	Precipitation	2	12	28	Histone 2A	Histone H2A-III OS=Gallus gallus PE=1 SV=2	P35062|H2A3_CHICK	L.AIRNDEELNKLLGK.V	Y	32.71	1611.89	14	0.6	538.306	3	19.99		F20:332	2	87	100
1-3	5-HCl-P	HCl	5 mL/g	Demineralization	Precipitation	2	12	28	Histone 2A	Histone H2A-III OS=Gallus gallus PE=1 SV=2	P35062|H2A3_CHICK	K.VTIAQGGVLPNIQ.A	Y	24.98	1308.74	13	0.2	655.377	2	26.56		F20:528	1	101	113
1-3	5-HCl-P	HCl	5 mL/g	Demineralization	Precipitation	1	14	41	Histone 2B	Histone H2B 1/2/3/4/6 OS=Gallus gallus GN=H2B-I PE=1 SV=2	P0C1H3|H2B1_CHICK	R.LLLP(+31.99)GELAK.H	Y	16.86	984.586	9	0.4	493.3	2	23.93		F19:463	1	101	109	Dihydroxy	P4:Dihydroxy:10.19
1-3	5-HCl-P	HCl	5 mL/g	Demineralization	Precipitation	1	14	41	Histone 2B	Histone H2B 1/2/3/4/6 OS=Gallus gallus GN=H2B-I PE=1 SV=2	P0C1H3|H2B1_CHICK	K.AM(+15.99)GIM(+15.99)NSFVNDIFER.I	Y	38.8	1774.8	15	0.5	888.409	2	30.01		F19:624	1	59	73	Oxidation (M)	M2:Oxidation (M):1000.00;M5:Oxidation (M):1000.00
1-3	5-HCl-P	HCl	5 mL/g	Demineralization	Precipitation	1	14	41	Histone 2B	Histone H2B 1/2/3/4/6 OS=Gallus gallus GN=H2B-I PE=1 SV=2	P0C1H3|H2B1_CHICK	K.AM(+31.99)GIMNSFVNDIF.E	Y	23.23	1489.66	13	1.2	745.837	2	34.05		F19:726	2	59	71	Sulphone	M2:Sulphone:0.00
1-3	5-HCl-P	HCl	5 mL/g	Demineralization	Precipitation	2	14	41	Histone 2B	Histone H2B 1/2/3/4/6 OS=Gallus gallus GN=H2B-I PE=1 SV=2	P0C1H3|H2B1_CHICK	A.VRLLLPGELAK.H	Y	23.08	1207.77	11	0.7	604.89	2	23.5		F20:442	1	99	109
1-3	5-HCl-P	HCl	5 mL/g	Demineralization	Precipitation	2	14	41	Histone 2B	Histone H2B 1/2/3/4/6 OS=Gallus gallus GN=H2B-I PE=1 SV=2	P0C1H3|H2B1_CHICK	R.LLLPGELAK.H	Y	15.62	952.596	9	0.7	477.305	2	23.87		F20:454	3	101	109
1-3	5-HCl-P	HCl	5 mL/g	Demineralization	Precipitation	2	14	41	Histone 2B	Histone H2B 1/2/3/4/6 OS=Gallus gallus GN=H2B-I PE=1 SV=2	P0C1H3|H2B1_CHICK	L.PGELAK.H	Y	24.5	613.343	6	0.8	614.351	1	24.07		F20:459	1	104	109
1-3	5-HCl-P	HCl	5 mL/g	Demineralization	Precipitation	2	14	41	Histone 2B	Histone H2B 1/2/3/4/6 OS=Gallus gallus GN=H2B-I PE=1 SV=2	P0C1H3|H2B1_CHICK	K.AM(+15.99)GIMNSFVNDIFER.I	Y	45.13	1758.81	15	1.7	880.412	2	34.34		F20:701	3	59	73	Oxidation (M)	M2:Oxidation (M):32.97
1-3	5-HCl-P	HCl	5 mL/g	Demineralization	Precipitation	2	26	74	Histone 4	Histone H4 OS=Gallus gallus GN=H4-I PE=1 SV=2	P62801|H4_CHICK	F.LENVIRDAVTYTEHAK.R	Y	42.93	1857.96	16	1.1	620.327	3	23.9		F20:455	1	63	78
1-3	5-HCl-P	HCl	5 mL/g	Demineralization	Precipitation	1	35	2191	Ig Lambda	Ig lambda chain C region OS=Gallus gallus PE=4 SV=1	P20763|LAC_CHICK	K.ATLVC(+57.02)LINDFYPSPVTVDWVIDGSTR.S	Y	24.9	2937.46	26	0	980.16	3	40.06		F19:830	1	24	49	Carbamidomethylation	C5:Carbamidomethylation:1000.00
1-3	5-HCl-P	HCl	5 mL/g	Demineralization	Precipitation	1	19	35	Lumican	Lumican OS=Gallus gallus GN=LUM PE=1 SV=1	P51890|LUM_CHICK	R.ADLPQEMYNC(+57.02)LR.V	Y	32.48	1508.68	12	0.4	755.345	2	25.89		F19:521	1	324	335	Carbamidomethylation	C10:Carbamidomethylation:1000.00
1-3	5-HCl-P	HCl	5 mL/g	Demineralization	Precipitation	1	19	35	Lumican	Lumican OS=Gallus gallus GN=LUM PE=1 SV=1	P51890|LUM_CHICK	K.GLNSLLYLDLSFNQLTK.L	Y	36.18	1938.05	17	1.5	970.032	2	36.82		F19:786	2	187	203
1-3	5-HCl-P	HCl	5 mL/g	Demineralization	Precipitation	2	19	35	Lumican	Lumican OS=Gallus gallus GN=LUM PE=1 SV=1	P51890|LUM_CHICK	K.SIPTVSENLENFYLQVNK.I	Y	27.54	2094.06	18	1.8	1048.04	2	31.77		F20:639	1	273	290
1-3	5-HCl-P	HCl	5 mL/g	Demineralization	Precipitation	1	11	51	Lysozyme C	Lysozyme C OS=Gallus gallus GN=LYZ PE=1 SV=1	P00698|LYSC_CHICK	R.NTDGSTDYGILQINSR.W	Y	41.38	1752.83	16	1	877.422	2	23.39		F19:445	2	64	79
1-3	5-HCl-P	HCl	5 mL/g	Demineralization	Precipitation	1	11	51	Lysozyme C	Lysozyme C OS=Gallus gallus GN=LYZ PE=1 SV=1	P00698|LYSC_CHICK	R.GYSLGNWVC(+57.02)AAK.F	Y	40.17	1324.62	12	0.7	663.319	2	25.76		F19:517	2	40	51	Carbamidomethylation	C9:Carbamidomethylation:1000.00
1-3	5-HCl-P	HCl	5 mL/g	Demineralization	Precipitation	1	11	51	Lysozyme C	Lysozyme C OS=Gallus gallus GN=LYZ PE=1 SV=1	P00698|LYSC_CHICK	R.NLC(+57.02)NIPC(+57.02)SALLSSDITASVNC(+57.02)AK.K	Y	40.86	2507.18	23	1.2	1254.6	2	28.9		F19:598	4	92	114	Carbamidomethylation	C3:Carbamidomethylation:1000.00;C7:Carbamidomethylation:1000.00;C21:Carbamidomethylation:1000.00
1-3	5-HCl-P	HCl	5 mL/g	Demineralization	Precipitation	1	13	621	Lysozyme G	Lysozyme g OS=Gallus gallus PE=2 SV=1	P27042|LYG_CHICK	K.RVGEALC(+57.02)IEPAVIAGIISR.E	Y	37.55	2023.12	19	1.2	675.383	3	31.47		F19:661	1	80	98	Carbamidomethylation	C7:Carbamidomethylation:1000.00
1-3	5-HCl-P	HCl	5 mL/g	Demineralization	Precipitation	2	13	621	Lysozyme G	Lysozyme g OS=Gallus gallus PE=2 SV=1	P27042|LYG_CHICK	R.VGEALC(+57.02)IEPAVIAGIISR.E	Y	48.27	1867.02	18	1.2	934.52	2	34.16		F20:696	6	81	98	Carbamidomethylation	C6:Carbamidomethylation:1000.00
1-3	5-HCl-P	HCl	5 mL/g	Demineralization	Precipitation	1	15	2182	Myeloid	Myeloid protein 1 OS=Gallus gallus GN=MIM1 PE=1 SV=2	P08940|MIM1_CHICK	K.HKGVDVIC(+57.02)TDGSIVYAPFSGQLSGPIR.F	Y	35.55	2872.45	27	0.9	958.493	3	26.71		F19:544	1	67	93	Carbamidomethylation	C8:Carbamidomethylation:1000.00
1-3	5-HCl-P	HCl	5 mL/g	Demineralization	Precipitation	1	15	2182	Myeloid	Myeloid protein 1 OS=Gallus gallus GN=MIM1 PE=1 SV=2	P08940|MIM1_CHICK	K.VFPGIVSHIHVENC(+57.02)DQSDPTHLLRPIPDISPPFPQ.Q	Y	16.29	3957.98	35	1.4	792.605	5	29.04		F19:601	1	143	177	Carbamidomethylation	C14:Carbamidomethylation:1000.00
1-3	5-HCl-P	HCl	5 mL/g	Demineralization	Precipitation	1	15	2182	Myeloid	Myeloid protein 1 OS=Gallus gallus GN=MIM1 PE=1 SV=2	P08940|MIM1_CHICK	K.GVDVIC(+57.02)ADGATVYAPFSGELSGPVK.F	Y	37.72	2508.22	25	1.4	837.082	3	29.67		F19:617	2	219	243	Carbamidomethylation	C6:Carbamidomethylation:1000.00
1-3	5-HCl-P	HCl	5 mL/g	Demineralization	Precipitation	1	15	2182	Myeloid	Myeloid protein 1 OS=Gallus gallus GN=MIM1 PE=1 SV=2	P08940|MIM1_CHICK	K.GVDVIC(+57.02)TDGSIVYAPFSGQLSGPIR.F	Y	39.6	2607.3	25	1.2	870.108	3	30.97		F19:650	2	69	93	Carbamidomethylation	C6:Carbamidomethylation:1000.00
1-3	5-HCl-P	HCl	5 mL/g	Demineralization	Precipitation	2	15	2182	Myeloid	Myeloid protein 1 OS=Gallus gallus GN=MIM1 PE=1 SV=2	P08940|MIM1_CHICK	R.VFPGIISHIHVE(+57.02)NCDR.S	Y	16.01	1891.94	16	1.1	631.653	3	22.29		F20:405	1	293	308	Carbamidomethylation (DHKE X@N-term)	E12:Carbamidomethylation (DHKE X@N-term):3.64
1-3	5-HCl-P	HCl	5 mL/g	Demineralization	Precipitation	2	15	2182	Myeloid	Myeloid protein 1 OS=Gallus gallus GN=MIM1 PE=1 SV=2	P08940|MIM1_CHICK	Q.Q(-17.03)DAHWAVVC(+57.02)AGNPTNEIR.G	Y	39.62	2019.92	18	1	1010.97	2	24.03		F20:458	1	178	195	Pyro-glu from Q; Carbamidomethylation	Q1:Pyro-glu from Q:1000.00;C9:Carbamidomethylation:1000.00
1-3	5-HCl-P	HCl	5 mL/g	Demineralization	Precipitation	2	34	37	Osteocalcin	Osteocalcin OS=Gallus gallus GN=BGLAP PE=1 SV=2	P02822|OSTCN_CHICK	R.EVC(+57.02)ELSPDC(+57.02)DELADQIGFQEAYRR.F	Y	27.61	2899.28	24	1.2	967.433	3	25.92		F20:510	1	69	92	Carbamidomethylation	C3:Carbamidomethylation:1000.00;C9:Carbamidomethylation:1000.00
1-3	5-HCl-P	HCl	5 mL/g	Demineralization	Precipitation	1	6	8	Osteonectin	SPARC OS=Gallus gallus GN=SPARC PE=4 SV=1	tr|F1P291|F1P291_CHICK	K.LHLDYIGPC(+57.02)K.F	Y	34.68	1214.61	10	0.4	608.313	2	19.1		F19:304	1	136	145	Carbamidomethylation	C9:Carbamidomethylation:1000.00
1-3	5-HCl-P	HCl	5 mL/g	Demineralization	Precipitation	1	6	8	Osteonectin	SPARC OS=Gallus gallus GN=SPARC PE=4 SV=1	tr|F1P291|F1P291_CHICK	K.NVLITLYERDEDNNLLTEK.Q	Y	34.22	2291.16	19	0.8	764.729	3	27.31		F19:562	2	168	186
1-3	5-HCl-P	HCl	5 mL/g	Demineralization	Precipitation	1	6	8	Osteonectin	SPARC OS=Gallus gallus GN=SPARC PE=4 SV=1	tr|F1P291|F1P291_CHICK	K.NYNM(+15.99)YIFPVHWQFGQLDQHPIDGYLSHTELAPLR.A	Y	45.49	4114.98	34	-0.2	824.003	5	31.5		F19:662	2	218	251	Oxidation (M)	M4:Oxidation (M):1000.00
1-3	5-HCl-P	HCl	5 mL/g	Demineralization	Precipitation	1	6	8	Osteonectin	SPARC OS=Gallus gallus GN=SPARC PE=4 SV=1	tr|F1P291|F1P291_CHICK	K.NYNMYIFPVHWQFGQLDQHPIDGYLSHTELAPLRAPLIPMEHC(+57.02)TTR.F	Y	28.28	5505.66	46	0.7	918.619	6	32.3		F19:681	1	218	263	Carbamidomethylation	C43:Carbamidomethylation:1000.00
1-3	5-HCl-P	HCl	5 mL/g	Demineralization	Precipitation	1	6	8	Osteonectin	SPARC OS=Gallus gallus GN=SPARC PE=4 SV=1	tr|F1P291|F1P291_CHICK	K.F(+15.99)IP(+15.99)AC(+57.02)LDTELTEFPLR.M	Y	31.06	1952.96	16	0.6	977.486	2	33.1		F19:699	1	146	161	Oxidation or Hydroxylation; Carbamidomethylation	F1:Oxidation or Hydroxylation:15.57;P3:Oxidation or Hydroxylation:16.51;C5:Carbamidomethylation:1000.00
1-3	5-HCl-P	HCl	5 mL/g	Demineralization	Precipitation	1	6	8	Osteonectin	SPARC OS=Gallus gallus GN=SPARC PE=4 SV=1	tr|F1P291|F1P291_CHICK	K.FIP(+15.99)AC(+57.02)LDTELTEFPLR.M	Y	19.33	1936.96	16	0.5	969.488	2	33.19		F19:701	1	146	161	Oxidation or Hydroxylation; Carbamidomethylation	P3:Oxidation or Hydroxylation:0.00;C5:Carbamidomethylation:1000.00
1-3	5-HCl-P	HCl	5 mL/g	Demineralization	Precipitation	1	6	8	Osteonectin	SPARC OS=Gallus gallus GN=SPARC PE=4 SV=1	tr|F1P291|F1P291_CHICK	K.FIPAC(+57.02)LDTELTEF.P	Y	33.58	1554.73	13	0.6	778.371	2	35.11		F19:749	2	146	158	Carbamidomethylation	C5:Carbamidomethylation:1000.00
1-3	5-HCl-P	HCl	5 mL/g	Demineralization	Precipitation	1	6	8	Osteonectin	SPARC OS=Gallus gallus GN=SPARC PE=4 SV=1	tr|F1P291|F1P291_CHICK	R.FFEAC(+57.02)DLDNDKYIALEEWASC(+57.02)FGIK.E	Y	33.15	3040.36	25	1.9	1014.46	3	35.87		F19:767	3	264	288	Carbamidomethylation	C5:Carbamidomethylation:1000.00;C21:Carbamidomethylation:1000.00
1-3	5-HCl-P	HCl	5 mL/g	Demineralization	Precipitation	1	6	8	Osteonectin	SPARC OS=Gallus gallus GN=SPARC PE=4 SV=1	tr|F1P291|F1P291_CHICK	R.FFE(+57.02)ACDLDNDKYIALEEWASC(+57.02)FGIK.E	Y	35.58	3040.36	25	1.6	1014.46	3	36.29		F19:776	1	264	288	Carbamidomethylation (DHKE X@N-term); Carbamidomethylation	E3:Carbamidomethylation (DHKE X@N-term):0.00;C21:Carbamidomethylation:1000.00
1-3	5-HCl-P	HCl	5 mL/g	Demineralization	Precipitation	2	6	8	Osteonectin	SPARC OS=Gallus gallus GN=SPARC PE=4 SV=1	tr|F1P291|F1P291_CHICK	K.EQDIDKDLVI	Y	25.53	1186.61	10	0.3	594.312	2	24.51		F20:473	4	289	298
1-3	5-HCl-P	HCl	5 mL/g	Demineralization	Precipitation	2	6	8	Osteonectin	SPARC OS=Gallus gallus GN=SPARC PE=4 SV=1	tr|F1P291|F1P291_CHICK	K.NYNMYIFPVHWQFGQLDQHPIDGYLSHTELAPLR.A	Y	42.05	4098.98	34	1.7	820.805	5	32.37		F20:653	2	218	251
1-3	5-HCl-P	HCl	5 mL/g	Demineralization	Precipitation	2	6	8	Osteonectin	SPARC OS=Gallus gallus GN=SPARC PE=4 SV=1	tr|F1P291|F1P291_CHICK	K.FIPAC(+57.02)LDTELTEFPLR.M	Y	48.3	1920.97	16	1.1	961.491	2	32.88		F20:660	4	146	161	Carbamidomethylation	C5:Carbamidomethylation:1000.00
1-3	5-HCl-P	HCl	5 mL/g	Demineralization	Precipitation	2	6	8	Osteonectin	SPARC OS=Gallus gallus GN=SPARC PE=4 SV=1	tr|F1P291|F1P291_CHICK	K.FIP(+31.99)AC(+57.02)LDTELTEFPLR.M	Y	29.76	1952.96	16	0.3	977.485	2	33.05		F20:665	1	146	161	Dihydroxy; Carbamidomethylation	P3:Dihydroxy:14.04;C5:Carbamidomethylation:1000.00
1-3	5-HCl-P	HCl	5 mL/g	Demineralization	Precipitation	2	6	8	Osteonectin	SPARC OS=Gallus gallus GN=SPARC PE=4 SV=1	tr|F1P291|F1P291_CHICK	R.FFEACD(+57.02)LDNDKYIALEEWASC(+57.02)FGIK.E	Y	36.15	3040.36	25	1.6	1014.46	3	36.13		F20:732	1	264	288	Carbamidomethylation (DHKE X@N-term); Carbamidomethylation	D6:Carbamidomethylation (DHKE X@N-term):0.00;C21:Carbamidomethylation:1000.00
1-3	5-HCl-P	HCl	5 mL/g	Demineralization	Precipitation	1	20	19	Pigment Epithelium Derived Factor	Uncharacterized protein OS=Gallus gallus GN=SERPINF1 PE=3 SV=1	tr|E1C7H6|E1C7H6_CHICK	G.Q(-17.03)NSPTTDGTVGEVEEEDPFYKTPINK.L	Y	21	2877.32	26	1.3	960.115	3	26.46		F19:537	1	26	51	Pyro-glu from Q	Q1:Pyro-glu from Q:1000.00
1-3	5-HCl-P	HCl	5 mL/g	Demineralization	Precipitation	1	20	19	Pigment Epithelium Derived Factor	Uncharacterized protein OS=Gallus gallus GN=SERPINF1 PE=3 SV=1	tr|E1C7H6|E1C7H6_CHICK	R.LQSLFTSPDFTK.I	Y	29.7	1382.71	12	0.3	692.362	2	26.84		F19:548	1	337	348
1-3	5-HCl-P	HCl	5 mL/g	Demineralization	Precipitation	1	20	19	Pigment Epithelium Derived Factor	Uncharacterized protein OS=Gallus gallus GN=SERPINF1 PE=3 SV=1	tr|E1C7H6|E1C7H6_CHICK	R.LTFPIEYHVDRPFLL.V	Y	30.63	1859	15	0.2	620.673	3	32.59		F19:686	1	385	399
1-3	5-HCl-P	HCl	5 mL/g	Demineralization	Precipitation	2	20	19	Pigment Epithelium Derived Factor	Uncharacterized protein OS=Gallus gallus GN=SERPINF1 PE=3 SV=1	tr|E1C7H6|E1C7H6_CHICK	R.TATANVLLSPFSLATALSGLSLGAGER.T	Y	32.1	2616.41	27	1.8	873.146	3	41.04		F20:786	1	71	97
1-3	5-HCl-P	HCl	5 mL/g	Demineralization	Precipitation	1	30	2184	Pleiotrophin	Pleiotrophin OS=Gallus gallus GN=PTN PE=1 SV=1	P32760|PTN_CHICK	K.YQFQAWGEC(+57.02)DLNTALK.T	Y	40.71	1942.89	16	0.9	972.452	2	28.15		F19:582	1	69	84	Carbamidomethylation	C9:Carbamidomethylation:1000.00
1-3	5-HCl-P	HCl	5 mL/g	Demineralization	Precipitation	1	8	55	Ribonucleause homolog	Ribonuclease homolog OS=Gallus gallus PE=2 SV=1	P30374|RSFR_CHICK	R.NLNTLCINQPDQALR.T	Y	23.61	1711.87	15	1.1	856.942	2	23.99		F19:465	1	77	91
1-3	5-HCl-P	HCl	5 mL/g	Demineralization	Precipitation	1	8	55	Ribonucleause homolog	Ribonuclease homolog OS=Gallus gallus PE=2 SV=1	P30374|RSFR_CHICK	G.VPTYQDFLYK.H	Y	35.32	1272.64	10	0.8	637.327	2	26.02		F19:524	3	24	33
1-3	5-HCl-P	HCl	5 mL/g	Demineralization	Precipitation	1	8	55	Ribonucleause homolog	Ribonuclease homolog OS=Gallus gallus PE=2 SV=1	P30374|RSFR_CHICK	G.VPTYQDF(+15.99)LYK.H	Y	21.52	1288.63	10	1.2	645.325	2	26.14		F19:528	1	24	33	Oxidation or Hydroxylation	F7:Oxidation or Hydroxylation:17.01
1-3	5-HCl-P	HCl	5 mL/g	Demineralization	Precipitation	2	8	55	Ribonucleause homolog	Ribonuclease homolog OS=Gallus gallus PE=2 SV=1	P30374|RSFR_CHICK	R.NLNTLC(+57.02)INQPDQALR.T	Y	44.46	1768.89	15	1	885.453	2	22.68		F20:418	3	77	91	Carbamidomethylation	C6:Carbamidomethylation:1000.00
1-3	5-HCl-P	HCl	5 mL/g	Demineralization	Precipitation	2	8	55	Ribonucleause homolog	Ribonuclease homolog OS=Gallus gallus PE=2 SV=1	P30374|RSFR_CHICK	K.TSFPSNAAYC(+57.02)NVMMVR.R	Y	35.72	1846.82	16	2.1	924.417	2	25.63		F20:502	1	40	55	Carbamidomethylation	C10:Carbamidomethylation:1000.00
1-3	5-HCl-P	HCl	5 mL/g	Demineralization	Precipitation	1	23	44	Serpin H1	Serpin H1 OS=Gallus gallus GN=SERPINH1 PE=1 SV=2	P13731|SERPH_CHICK	R.LYGPASINFADDFVK.N	Y	49.33	1655.82	15	0.8	828.918	2	30.55		F19:638	2	121	135
1-3	5-HCl-P	HCl	5 mL/g	Demineralization	Precipitation	1	2	3	Serum Albumin	Serum albumin OS=Gallus gallus GN=ALB PE=1 SV=2	P19121|ALBU_CHICK	K.LC(+57.02)SAPAEEREVGQMK.L	Y	22.32	1703.8	15	0.9	568.94	3	14.54		F19:156	2	541	555	Carbamidomethylation	C2:Carbamidomethylation:1000.00
1-3	5-HCl-P	HCl	5 mL/g	Demineralization	Precipitation	1	2	3	Serum Albumin	Serum albumin OS=Gallus gallus GN=ALB PE=1 SV=2	P19121|ALBU_CHICK	K.QQYFC(+57.02)GILK.Q	Y	35.21	1155.57	9	1.1	578.795	2	24.22		F19:471	2	224	232	Carbamidomethylation	C5:Carbamidomethylation:1000.00
1-3	5-HCl-P	HCl	5 mL/g	Demineralization	Precipitation	1	2	3	Serum Albumin	Serum albumin OS=Gallus gallus GN=ALB PE=1 SV=2	P19121|ALBU_CHICK	R.RHPEFSIQLIMR.I	Y	36.49	1525.82	12	0.5	509.614	3	24.86		F19:489	2	365	376
1-3	5-HCl-P	HCl	5 mL/g	Demineralization	Precipitation	1	2	3	Serum Albumin	Serum albumin OS=Gallus gallus GN=ALB PE=1 SV=2	P19121|ALBU_CHICK	K.TIADGFTAM(+15.99)VDK.C	Y	40.51	1283.61	12	1.4	642.812	2	25.16		F19:499	2	574	585	Oxidation (M)	M9:Oxidation (M):1000.00
1-3	5-HCl-P	HCl	5 mL/g	Demineralization	Precipitation	1	2	3	Serum Albumin	Serum albumin OS=Gallus gallus GN=ALB PE=1 SV=2	P19121|ALBU_CHICK	R.SQC(+57.02)IMEAEFDEKPADLPSLVEK.Y	Y	44.41	2535.19	22	0.9	846.071	3	26.77		F19:546	1	315	336	Carbamidomethylation	C3:Carbamidomethylation:1000.00
1-3	5-HCl-P	HCl	5 mL/g	Demineralization	Precipitation	1	2	3	Serum Albumin	Serum albumin OS=Gallus gallus GN=ALB PE=1 SV=2	P19121|ALBU_CHICK	K.LLINLIK.R	Y	21.17	825.569	7	1	826.577	1	27.72		F19:569	6	556	562
1-3	5-HCl-P	HCl	5 mL/g	Demineralization	Precipitation	1	2	3	Serum Albumin	Serum albumin OS=Gallus gallus GN=ALB PE=1 SV=2	P19121|ALBU_CHICK	K.YVPPPFNPDMF(+15.99)SFDEK.L	Y	24.51	1944.86	16	1.7	973.439	2	29.56		F19:614	3	525	540	Oxidation or Hydroxylation	F11:Oxidation or Hydroxylation:22.85
1-3	5-HCl-P	HCl	5 mL/g	Demineralization	Precipitation	1	2	3	Serum Albumin	Serum albumin OS=Gallus gallus GN=ALB PE=1 SV=2	P19121|ALBU_CHICK	K.SFEAGHDAFMAEFVYEYSR.R	Y	54.44	2254.96	19	0.8	1128.49	2	30.83		F19:647	5	346	364
1-3	5-HCl-P	HCl	5 mL/g	Demineralization	Precipitation	1	2	3	Serum Albumin	Serum albumin OS=Gallus gallus GN=ALB PE=1 SV=2	P19121|ALBU_CHICK	K.YVPPPFNPDMFSFDEK.L	Y	43.91	1928.87	16	0.3	643.963	3	32.19		F19:678	5	525	540
1-3	5-HCl-P	HCl	5 mL/g	Demineralization	Precipitation	1	2	3	Serum Albumin	Serum albumin OS=Gallus gallus GN=ALB PE=1 SV=2	P19121|ALBU_CHICK	K.YVPPPFN(+15.99)PDMFSFDEK.L	Y	18.44	1944.86	16	1.1	973.438	2	32.22		F19:679	1	525	540	Oxidation or Hydroxylation	N7:Oxidation or Hydroxylation:0.00
1-3	5-HCl-P	HCl	5 mL/g	Demineralization	Precipitation	1	2	3	Serum Albumin	Serum albumin OS=Gallus gallus GN=ALB PE=1 SV=2	P19121|ALBU_CHICK	K.C(+57.02)VANEDAPEC(+57.02)SKPLPSIILDEIC(+57.02)QVEK.L	Y	38.43	3113.47	27	1.5	1038.83	3	33.6		F19:713	4	80	106	Carbamidomethylation	C1:Carbamidomethylation:1000.00;C10:Carbamidomethylation:1000.00;C23:Carbamidomethylation:1000.00
1-3	5-HCl-P	HCl	5 mL/g	Demineralization	Precipitation	1	2	3	Serum Albumin	Serum albumin OS=Gallus gallus GN=ALB PE=1 SV=2	P19121|ALBU_CHICK	R.RHPFLYAPAILSFAVDFEHALQSC(+57.02)C(+57.02)K.E	Y	52.99	3076.51	26	0.7	770.134	4	38.1		F19:803	5	173	198	Carbamidomethylation	C24:Carbamidomethylation:1000.00;C25:Carbamidomethylation:1000.00
1-3	5-HCl-P	HCl	5 mL/g	Demineralization	Precipitation	2	2	3	Serum Albumin	Serum albumin OS=Gallus gallus GN=ALB PE=1 SV=2	P19121|ALBU_CHICK	K.VSQPDFVQPYQRPASDVIC(+57.02)QEYQDNR.V	Y	31.89	3138.45	26	1.6	1047.16	3	23.09		F20:431	1	134	159	Carbamidomethylation	C19:Carbamidomethylation:1000.00
1-3	5-HCl-P	HCl	5 mL/g	Demineralization	Precipitation	2	2	3	Serum Albumin	Serum albumin OS=Gallus gallus GN=ALB PE=1 SV=2	P19121|ALBU_CHICK	R.SQC(+57.02)IM(+15.99)EAEFDEKPADLPSLVEK.Y	Y	46.82	2551.18	22	0.5	851.402	3	24.48		F20:472	2	315	336	Carbamidomethylation; Oxidation (M)	C3:Carbamidomethylation:1000.00;M5:Oxidation (M):1000.00
1-3	5-HCl-P	HCl	5 mL/g	Demineralization	Precipitation	2	2	3	Serum Albumin	Serum albumin OS=Gallus gallus GN=ALB PE=1 SV=2	P19121|ALBU_CHICK	K.TIADGFTAMVDK.C	Y	45.98	1267.61	12	0.8	634.814	2	25.21		F20:489	4	574	585
1-3	5-HCl-P	HCl	5 mL/g	Demineralization	Precipitation	2	2	3	Serum Albumin	Serum albumin OS=Gallus gallus GN=ALB PE=1 SV=2	P19121|ALBU_CHICK	K.QSDINTC(+57.02)FGEEGANLIVQSR.A	Y	42.4	2237.04	20	1	746.687	3	25.87		F20:508	6	589	608	Carbamidomethylation	C7:Carbamidomethylation:1000.00
1-3	5-HCl-P	HCl	5 mL/g	Demineralization	Precipitation	2	2	3	Serum Albumin	Serum albumin OS=Gallus gallus GN=ALB PE=1 SV=2	P19121|ALBU_CHICK	D.TKYVPPPFNPDM(+15.99)FSFDEK.L	Y	31.4	2174	18	1.1	725.676	3	26.15		F20:517	4	523	540	Oxidation (M)	M12:Oxidation (M):1000.00
1-3	5-HCl-P	HCl	5 mL/g	Demineralization	Precipitation	2	2	3	Serum Albumin	Serum albumin OS=Gallus gallus GN=ALB PE=1 SV=2	P19121|ALBU_CHICK	R.MAC(+57.02)SEGYLSIVIHDTC(+57.02)R.K	Y	38.13	2010.9	17	0.3	671.306	3	26.92		F20:538	1	474	490	Carbamidomethylation	C3:Carbamidomethylation:1000.00;C16:Carbamidomethylation:1000.00
1-3	5-HCl-P	HCl	5 mL/g	Demineralization	Precipitation	2	2	3	Serum Albumin	Serum albumin OS=Gallus gallus GN=ALB PE=1 SV=2	P19121|ALBU_CHICK	K.AVAM(+15.99)ITFAQYLQR.C	Y	45.4	1526.79	13	-0.5	764.403	2	27.93		F20:563	2	48	60	Oxidation (M)	M4:Oxidation (M):1000.00
1-3	5-HCl-P	HCl	5 mL/g	Demineralization	Precipitation	2	2	3	Serum Albumin	Serum albumin OS=Gallus gallus GN=ALB PE=1 SV=2	P19121|ALBU_CHICK	L.LINLIK.R	Y	21.55	712.485	6	0.2	713.492	1	28.03		F20:566	1	557	562
1-3	5-HCl-P	HCl	5 mL/g	Demineralization	Precipitation	2	2	3	Serum Albumin	Serum albumin OS=Gallus gallus GN=ALB PE=1 SV=2	P19121|ALBU_CHICK	D.TKYVPPPFNPDMFSFDEK.L	Y	37.9	2158.01	18	0.6	720.344	3	28.85		F20:579	2	523	540
1-3	5-HCl-P	HCl	5 mL/g	Demineralization	Precipitation	2	2	3	Serum Albumin	Serum albumin OS=Gallus gallus GN=ALB PE=1 SV=2	P19121|ALBU_CHICK	K.YVPPPFNPDM(+15.99)FSFDEK.L	Y	36.15	1944.86	16	0.7	649.294	3	29.33		F20:589	2	525	540	Oxidation (M)	M10:Oxidation (M):1000.00
1-3	5-HCl-P	HCl	5 mL/g	Demineralization	Precipitation	2	2	3	Serum Albumin	Serum albumin OS=Gallus gallus GN=ALB PE=1 SV=2	P19121|ALBU_CHICK	R.VSFLGHFIYSVAR.R	Y	41.87	1494.8	13	0.6	748.407	2	29.92		F20:600	4	160	172
1-3	5-HCl-P	HCl	5 mL/g	Demineralization	Precipitation	2	2	3	Serum Albumin	Serum albumin OS=Gallus gallus GN=ALB PE=1 SV=2	P19121|ALBU_CHICK	K.AVAMITFAQYLQR.C	Y	45.7	1510.8	13	1.1	756.406	2	31.57		F20:633	3	48	60
1-3	5-HCl-P	HCl	5 mL/g	Demineralization	Precipitation	2	2	3	Serum Albumin	Serum albumin OS=Gallus gallus GN=ALB PE=1 SV=2	P19121|ALBU_CHICK	K.YVPPPF(+15.99)NPDMFSFDEK.L	Y	20.55	1944.86	16	2.7	973.44	2	32.09		F20:647	1	525	540	Oxidation or Hydroxylation	F6:Oxidation or Hydroxylation:0.00
1-3	5-HCl-P	HCl	5 mL/g	Demineralization	Precipitation	2	2	3	Serum Albumin	Serum albumin OS=Gallus gallus GN=ALB PE=1 SV=2	P19121|ALBU_CHICK	F.LYAPAILSFAVDFEHALQSC(+57.02)C(+57.02)K.E	Y	27.99	2539.22	22	1.2	847.416	3	40.19		F20:777	1	177	198	Carbamidomethylation	C20:Carbamidomethylation:1000.00;C21:Carbamidomethylation:1000.00
1-3	5-HCl-P	HCl	5 mL/g	Demineralization	Precipitation	2	2	3	Serum Albumin	Serum albumin OS=Gallus gallus GN=ALB PE=1 SV=2	P19121|ALBU_CHICK	R.HPFLYAPAILSFAVDFEHALQSC(+57.02)C(+57.02)K.E	Y	35.74	2920.4	25	2	974.477	3	40.31		F20:779	2	174	198	Carbamidomethylation	C23:Carbamidomethylation:1000.00;C24:Carbamidomethylation:1000.00
1-3	5-HCl-P	HCl	5 mL/g	Demineralization	Precipitation	1	17	34	Tetranectin	Tetranectin OS=Gallus gallus GN=CLEC3B PE=2 SV=1	tr|Q9DDD4|Q9DDD4_CHICK	K.AMIDNISQEVALLK.E	Y	15.63	1543.83	14	0.7	772.922	2	30.89		F19:648	1	48	61
1-3	5-HCl-P	HCl	5 mL/g	Demineralization	Precipitation	2	17	34	Tetranectin	Tetranectin OS=Gallus gallus GN=CLEC3B PE=2 SV=1	tr|Q9DDD4|Q9DDD4_CHICK	R.YKNWETEITTQPDGGKLENC(+57.02)AALSGVAVGK.W	Y	20.32	3235.58	30	1	809.904	4	23.75		F20:450	1	153	182	Carbamidomethylation	C20:Carbamidomethylation:1000.00
1-3	5-HCl-P	HCl	5 mL/g	Demineralization	Precipitation	2	17	34	Tetranectin	Tetranectin OS=Gallus gallus GN=CLEC3B PE=2 SV=1	tr|Q9DDD4|Q9DDD4_CHICK	R.C(+57.02)KEQLPYVC(+57.02)QFM(+15.99)IV	Y	25.23	1829.85	14	1.1	915.934	2	29.95		F20:601	1	188	201	Carbamidomethylation; Oxidation (M)	C1:Carbamidomethylation:1000.00;C9:Carbamidomethylation:1000.00;M12:Oxidation (M):1000.00
1-3	5-HCl-P	HCl	5 mL/g	Demineralization	Precipitation	2	17	34	Tetranectin	Tetranectin OS=Gallus gallus GN=CLEC3B PE=2 SV=1	tr|Q9DDD4|Q9DDD4_CHICK	K.SIGNEAEIWLGLNDMVAEGK.W	Y	33.83	2145.04	20	1.3	1073.53	2	34.74		F20:708	3	123	142
1-3	5-HCl-P	HCl	5 mL/g	Demineralization	Precipitation	1	24	20	Vitronectin	Vitronectin OS=Gallus gallus PE=2 SV=1	tr|O12945|O12945_CHICK	K.LISDVWGIEGPIDAAFTR.I	Y	36.48	1959.01	18	1.5	980.514	2	34.74		F19:741	2	193	210
1	5-H/GuHCl-D	GuHCl	5 mL/g	Solubilization	Dialysis	1	9	7	Alpha-2-HS-glycoprotein	Uncharacterized protein OS=Gallus gallus GN=AHSG PE=4 SV=1	tr|E1BZE1|E1BZE1_CHICK	K.DNLAAC(+57.02)QLLPEDQSNFGFC(+57.02)TAK.M	Y	19.62	2498.12	22	2.5	1250.07	2	28.27		F13:577	1	213	234	Carbamidomethylation	C6:Carbamidomethylation:1000.00;C19:Carbamidomethylation:1000.00
1	5-H/GuHCl-D	GuHCl	5 mL/g	Solubilization	Dialysis	1	9	7	Alpha-2-HS-glycoprotein	Uncharacterized protein OS=Gallus gallus GN=AHSG PE=4 SV=1	tr|E1BZE1|E1BZE1_CHICK	K.NPDVYLMLLEIGR.A	Y	38.77	1531.81	13	1.5	766.912	2	36.09		F13:714	1	172	184
1	5-H/GuHCl-D	GuHCl	5 mL/g	Solubilization	Dialysis	1	3	6	Apolipoprotein	Apolipoprotein A-I OS=Gallus gallus GN=APOA1 PE=1 SV=2	P08250|APOA1_CHICK	K.LADNLDTLSAAAAK.L	Y	43.59	1372.72	14	0.8	687.368	2	21.25		F13:385	3	69	82
1	5-H/GuHCl-D	GuHCl	5 mL/g	Solubilization	Dialysis	1	3	6	Apolipoprotein	Apolipoprotein A-I OS=Gallus gallus GN=APOA1 PE=1 SV=2	P08250|APOA1_CHICK	K.ASGKDAIAQFESSAVGK.Q	Y	45.22	1664.84	17	0.5	555.953	3	21.63		F13:397	1	47	63
1	5-H/GuHCl-D	GuHCl	5 mL/g	Solubilization	Dialysis	1	3	6	Apolipoprotein	Apolipoprotein A-I OS=Gallus gallus GN=APOA1 PE=1 SV=2	P08250|APOA1_CHICK	R.IRDM(+15.99)VDVYLETVK.A	Y	30.88	1595.82	13	0.6	532.948	3	22.54		F13:427	2	34	46	Oxidation (M)	M4:Oxidation (M):1000.00
1	5-H/GuHCl-D	GuHCl	5 mL/g	Solubilization	Dialysis	1	3	6	Apolipoprotein	Apolipoprotein A-I OS=Gallus gallus GN=APOA1 PE=1 SV=2	P08250|APOA1_CHICK	R.EM(+15.99)WLKDTEALRAELTK.D	Y	35.15	1948.99	16	1.6	650.673	3	26.15		F13:524	1	96	111	Oxidation (M)	M2:Oxidation (M):1000.00
1	5-H/GuHCl-D	GuHCl	5 mL/g	Solubilization	Dialysis	1	3	6	Apolipoprotein	Apolipoprotein A-I OS=Gallus gallus GN=APOA1 PE=1 SV=2	P08250|APOA1_CHICK	R.LISFLDELQK.S	Y	33.31	1204.67	10	0.7	603.343	2	30.46		F13:619	2	252	261
1	5-H/GuHCl-D	GuHCl	5 mL/g	Solubilization	Dialysis	1	3	6	Apolipoprotein	Apolipoprotein A-I OS=Gallus gallus GN=APOA1 PE=1 SV=2	P08250|APOA1_CHICK	R.LISF(+31.99)LDELQK.S	Y	25.25	1236.66	10	1.6	619.338	2	30.55		F13:622	1	252	261	Dihydroxy	F4:Dihydroxy:53.33
1	5-H/GuHCl-D	GuHCl	5 mL/g	Solubilization	Dialysis	1	3	6	Apolipoprotein	Apolipoprotein A-I OS=Gallus gallus GN=APOA1 PE=1 SV=2	P08250|APOA1_CHICK	R.LISF(+15.99)LDELQK.S	Y	27.92	1220.67	10	2.4	611.341	2	30.6		F13:623	1	252	261	Oxidation or Hydroxylation	F4:Oxidation or Hydroxylation:60.92
1	5-H/GuHCl-D	GuHCl	5 mL/g	Solubilization	Dialysis	2	3	6	Apolipoprotein	Apolipoprotein A-I OS=Gallus gallus GN=APOA1 PE=1 SV=2	P08250|APOA1_CHICK	K.IRPFLDQFSAK.W	Y	36.17	1320.72	11	0.7	661.367	2	23.62		F14:457	2	120	130
1	5-H/GuHCl-D	GuHCl	5 mL/g	Solubilization	Dialysis	2	3	6	Apolipoprotein	Apolipoprotein A-I OS=Gallus gallus GN=APOA1 PE=1 SV=2	P08250|APOA1_CHICK	K.DAIAQFESSAVGK.Q	Y	36.1	1321.65	13	0.8	661.833	2	23.91		F14:466	1	51	63
1	5-H/GuHCl-D	GuHCl	5 mL/g	Solubilization	Dialysis	2	3	6	Apolipoprotein	Apolipoprotein A-I OS=Gallus gallus GN=APOA1 PE=1 SV=2	P08250|APOA1_CHICK	R.LTPVAQELKELTK.Q	Y	40.58	1468.85	13	1.2	735.433	2	25.33		F14:504	1	142	154
1	5-H/GuHCl-D	GuHCl	5 mL/g	Solubilization	Dialysis	2	3	6	Apolipoprotein	Apolipoprotein A-I OS=Gallus gallus GN=APOA1 PE=1 SV=2	P08250|APOA1_CHICK	R.EM(+15.99)WLKDTEALRAELTKDLEEVKEK.I	Y	47.45	2919.49	24	0.5	584.905	5	30.83		F14:622	2	96	119	Oxidation (M)	M2:Oxidation (M):1000.00
1	5-H/GuHCl-D	GuHCl	5 mL/g	Solubilization	Dialysis	2	12	618	Collagen XI, alpha 1	Uncharacterized protein OS=Gallus gallus GN=COL11A1 PE=4 SV=2	tr|F1P4K9|F1P4K9_CHICK	R.ILDEEVFEGEIQQLLIIADPR.A	Y	20.93	2439.29	21	2.4	814.106	3	41.65		F14:755	2	213	233
1	5-H/GuHCl-D	GuHCl	5 mL/g	Solubilization	Dialysis	1	2	4	Collagen I, alpha 1	Collagen alpha-1(I) chain OS=Gallus gallus GN=COL1A1 PE=1 SV=3	P02457|CO1A1_CHICK	R.DGAAGP(+15.99)KGDRGETGPAGPPGAP(+15.99)GAPGAP(+15.99)GPVGPAGK.N	Y	20.6	3092.49	36	0.6	774.13	4	13.29		F13:127	1	1016	1051	Oxidation or Hydroxylation	P6:Oxidation or Hydroxylation:0.00;P22:Oxidation or Hydroxylation:28.36;P28:Oxidation or Hydroxylation:26.31
1	5-H/GuHCl-D	GuHCl	5 mL/g	Solubilization	Dialysis	1	2	4	Collagen I, alpha 1	Collagen alpha-1(I) chain OS=Gallus gallus GN=COL1A1 PE=1 SV=3	P02457|CO1A1_CHICK	R.GAP(+15.99)GPP(+15.99)GAVGAAGKDGEAGAQGPP(+15.99)GPTGPAGER.G	Y	45.52	2855.34	33	1.4	952.79	3	13.64		F13:135	2	588	620	Oxidation or Hydroxylation	P3:Oxidation or Hydroxylation:32.28;P6:Oxidation or Hydroxylation:7.21;P24:Oxidation or Hydroxylation:109.46
1	5-H/GuHCl-D	GuHCl	5 mL/g	Solubilization	Dialysis	1	2	4	Collagen I, alpha 1	Collagen alpha-1(I) chain OS=Gallus gallus GN=COL1A1 PE=1 SV=3	P02457|CO1A1_CHICK	K.GDRGETGPAGPP(+15.99)GAPGAP(+15.99)GAP(+15.99)GPVGPAGK.N	Y	27.91	2496.2	29	1.4	833.075	3	13.72		F13:138	1	1023	1051	Oxidation or Hydroxylation	P12:Oxidation or Hydroxylation:7.21;P18:Oxidation or Hydroxylation:0.00;P21:Oxidation or Hydroxylation:20.41
1	5-H/GuHCl-D	GuHCl	5 mL/g	Solubilization	Dialysis	1	2	4	Collagen I, alpha 1	Collagen alpha-1(I) chain OS=Gallus gallus GN=COL1A1 PE=1 SV=3	P02457|CO1A1_CHICK	R.GAP(+15.99)GPP(+15.99)GAVGAAGKDGEAGAQGPPGPTGPAGER.G	Y	43.32	2839.35	33	2	947.459	3	14.22		F13:152	3	588	620	Oxidation or Hydroxylation	P3:Oxidation or Hydroxylation:14.04;P6:Oxidation or Hydroxylation:17.01
1	5-H/GuHCl-D	GuHCl	5 mL/g	Solubilization	Dialysis	1	2	4	Collagen I, alpha 1	Collagen alpha-1(I) chain OS=Gallus gallus GN=COL1A1 PE=1 SV=3	P02457|CO1A1_CHICK	R.GFP(+15.99)GADGIAGPKGPPGER(+15.99).G	Y	20.09	1710.83	18	1.3	856.425	2	16.26		F13:218	1	483	500	Oxidation or Hydroxylation	P3:Oxidation or Hydroxylation:0.00;R18:Oxidation or Hydroxylation:0.00
1	5-H/GuHCl-D	GuHCl	5 mL/g	Solubilization	Dialysis	1	2	4	Collagen I, alpha 1	Collagen alpha-1(I) chain OS=Gallus gallus GN=COL1A1 PE=1 SV=3	P02457|CO1A1_CHICK	R.GLTGPIGP(+15.99)PGPAGAP(+15.99)GDKGEAGPP(+15.99)GPAGPTGAR.G	Y	48.43	2878.42	33	0	960.481	3	16.84	492000000	F13:237	3	753	785	Oxidation or Hydroxylation	P8:Oxidation or Hydroxylation:19.05;P15:Oxidation or Hydroxylation:42.89;P24:Oxidation or Hydroxylation:56.47
1	5-H/GuHCl-D	GuHCl	5 mL/g	Solubilization	Dialysis	1	2	4	Collagen I, alpha 1	Collagen alpha-1(I) chain OS=Gallus gallus GN=COL1A1 PE=1 SV=3	P02457|CO1A1_CHICK	R.GPPGP(+15.99)MGPP(+15.99)GLAGPPGEAGR(+15.99).E	Y	28.83	1815.86	20	1.6	908.937	2	17.32		F13:254	1	984	1003	Oxidation or Hydroxylation	P5:Oxidation or Hydroxylation:0.00;P9:Oxidation or Hydroxylation:12.28;R20:Oxidation or Hydroxylation:0.00
1	5-H/GuHCl-D	GuHCl	5 mL/g	Solubilization	Dialysis	1	2	4	Collagen I, alpha 1	Collagen alpha-1(I) chain OS=Gallus gallus GN=COL1A1 PE=1 SV=3	P02457|CO1A1_CHICK	R.GLTGPIGPP(+15.99)GPAGAP(+15.99)GDKGEAGPP(+15.99)GPAGPTGAR.G	Y	44.8	2878.42	33	1.8	960.483	3	17.49	492000000	F13:260	2	753	785	Oxidation or Hydroxylation	P9:Oxidation or Hydroxylation:28.70;P15:Oxidation or Hydroxylation:43.57;P24:Oxidation or Hydroxylation:14.62
1	5-H/GuHCl-D	GuHCl	5 mL/g	Solubilization	Dialysis	1	2	4	Collagen I, alpha 1	Collagen alpha-1(I) chain OS=Gallus gallus GN=COL1A1 PE=1 SV=3	P02457|CO1A1_CHICK	R.GFP(+15.99)GADGIAGPK.G	Y	40.14	1101.55	12	0.9	551.78	2	17.67		F13:266	1	483	494	Oxidation or Hydroxylation	P3:Oxidation or Hydroxylation:11.06
1	5-H/GuHCl-D	GuHCl	5 mL/g	Solubilization	Dialysis	1	2	4	Collagen I, alpha 1	Collagen alpha-1(I) chain OS=Gallus gallus GN=COL1A1 PE=1 SV=3	P02457|CO1A1_CHICK	R.GFSGLQGP(+15.99)PGPP(+15.99)GAP(+15.99)GEQGPSGASGPAGPR.G	Y	41.7	2688.25	30	1.1	897.092	3	18.92	120000000	F13:310	2	1101	1130	Oxidation or Hydroxylation	P8:Oxidation or Hydroxylation:22.09;P12:Oxidation or Hydroxylation:12.33;P15:Oxidation or Hydroxylation:56.99
1	5-H/GuHCl-D	GuHCl	5 mL/g	Solubilization	Dialysis	1	2	4	Collagen I, alpha 1	Collagen alpha-1(I) chain OS=Gallus gallus GN=COL1A1 PE=1 SV=3	P02457|CO1A1_CHICK	R.GFSGLQGPP(+15.99)GPP(+15.99)GAP(+15.99)GEQGPSGASGPAGPR.G	Y	51.15	2688.25	30	1.4	1345.14	2	18.95	71300000	F13:311	6	1101	1130	Oxidation or Hydroxylation	P9:Oxidation or Hydroxylation:46.13;P12:Oxidation or Hydroxylation:96.46;P15:Oxidation or Hydroxylation:49.79
1	5-H/GuHCl-D	GuHCl	5 mL/g	Solubilization	Dialysis	1	2	4	Collagen I, alpha 1	Collagen alpha-1(I) chain OS=Gallus gallus GN=COL1A1 PE=1 SV=3	P02457|CO1A1_CHICK	R.GQAGVMGFP(+15.99)GPK.G	Y	45.1	1160.56	12	0.7	581.29	2	19.09		F13:316	3	564	575	Oxidation or Hydroxylation	P9:Oxidation or Hydroxylation:4.64
1	5-H/GuHCl-D	GuHCl	5 mL/g	Solubilization	Dialysis	1	2	4	Collagen I, alpha 1	Collagen alpha-1(I) chain OS=Gallus gallus GN=COL1A1 PE=1 SV=3	P02457|CO1A1_CHICK	R.GLP(+15.99)GTAGLPGMK(+15.99).G	Y	34.53	1129.58	12	1	565.798	2	19.17		F13:319	1	243	254	Oxidation or Hydroxylation	P3:Oxidation or Hydroxylation:102.87;K12:Oxidation or Hydroxylation:6.63
1	5-H/GuHCl-D	GuHCl	5 mL/g	Solubilization	Dialysis	1	2	4	Collagen I, alpha 1	Collagen alpha-1(I) chain OS=Gallus gallus GN=COL1A1 PE=1 SV=3	P02457|CO1A1_CHICK	R.GQAGVMGFPGPK(+15.99).G	Y	39.71	1160.56	12	0.8	581.29	2	19.27		F13:322	1	564	575	Oxidation or Hydroxylation	K12:Oxidation or Hydroxylation:5.77
1	5-H/GuHCl-D	GuHCl	5 mL/g	Solubilization	Dialysis	1	2	4	Collagen I, alpha 1	Collagen alpha-1(I) chain OS=Gallus gallus GN=COL1A1 PE=1 SV=3	P02457|CO1A1_CHICK	R.GFP(+15.99)GLP(+15.99)GPSGEPGK.Q	Y	41.97	1327.64	14	1	664.828	2	19.61		F13:334	4	960	973	Oxidation or Hydroxylation	P3:Oxidation or Hydroxylation:14.02;P6:Oxidation or Hydroxylation:26.31
1	5-H/GuHCl-D	GuHCl	5 mL/g	Solubilization	Dialysis	1	2	4	Collagen I, alpha 1	Collagen alpha-1(I) chain OS=Gallus gallus GN=COL1A1 PE=1 SV=3	P02457|CO1A1_CHICK	K.DGLNGLP(+15.99)GPIGP(+15.99)PGPR(+15.99).G	Y	37.67	1560.79	16	0.8	781.403	2	20.38		F13:358	2	1142	1157	Oxidation or Hydroxylation	P7:Oxidation or Hydroxylation:45.01;P12:Oxidation or Hydroxylation:0.00;R16:Oxidation or Hydroxylation:4.05
1	5-H/GuHCl-D	GuHCl	5 mL/g	Solubilization	Dialysis	1	2	4	Collagen I, alpha 1	Collagen alpha-1(I) chain OS=Gallus gallus GN=COL1A1 PE=1 SV=3	P02457|CO1A1_CHICK	K.DGLNGLP(+15.99)GPIGPP(+15.99)GPR(+15.99).G	Y	26.16	1560.79	16	0.8	781.403	2	20.65		F13:367	1	1142	1157	Oxidation or Hydroxylation	P7:Oxidation or Hydroxylation:26.31;P13:Oxidation or Hydroxylation:0.00;R16:Oxidation or Hydroxylation:0.00
1	5-H/GuHCl-D	GuHCl	5 mL/g	Solubilization	Dialysis	1	2	4	Collagen I, alpha 1	Collagen alpha-1(I) chain OS=Gallus gallus GN=COL1A1 PE=1 SV=3	P02457|CO1A1_CHICK	K.ALLLQGANEIEIR.A	Y	42.76	1438.81	13	1	720.415	2	26.73		F13:538	1	1376	1388
1	5-H/GuHCl-D	GuHCl	5 mL/g	Solubilization	Dialysis	1	2	4	Collagen I, alpha 1	Collagen alpha-1(I) chain OS=Gallus gallus GN=COL1A1 PE=1 SV=3	P02457|CO1A1_CHICK	R.GLTGPIGP(+15.99)PGPAGAPGD(+15.99)KGEAGP(+15.99)PGPAGPTGAR.G	Y	13.58	2878.42	33	1.7	960.482	3	35.54		F13:705	1	753	785	Oxidation or Hydroxylation	P8:Oxidation or Hydroxylation:0.00;D17:Oxidation or Hydroxylation:0.00;P23:Oxidation or Hydroxylation:0.00
1	5-H/GuHCl-D	GuHCl	5 mL/g	Solubilization	Dialysis	1	2	4	Collagen I, alpha 1	Collagen alpha-1(I) chain OS=Gallus gallus GN=COL1A1 PE=1 SV=3	P02457|CO1A1_CHICK	R.GLTGPIGPPGP(+15.99)AGAPGDK(+15.99)GEAGPPGPAGPTGAR(+15.99).G	Y	14.31	2878.42	33	0.8	960.482	3	42.94		F13:777	1	753	785	Oxidation or Hydroxylation	P11:Oxidation or Hydroxylation:0.00;K18:Oxidation or Hydroxylation:0.00;R33:Oxidation or Hydroxylation:0.71
1	5-H/GuHCl-D	GuHCl	5 mL/g	Solubilization	Dialysis	2	2	4	Collagen I, alpha 1	Collagen alpha-1(I) chain OS=Gallus gallus GN=COL1A1 PE=1 SV=3	P02457|CO1A1_CHICK	R.GFPGAD(+15.99)GIAGPKGPP(+15.99)GER.G	Y	19.61	1710.83	18	1.2	856.425	2	15.98		F14:208	1	483	500	Oxidation or Hydroxylation	D6:Oxidation or Hydroxylation:0.00;P15:Oxidation or Hydroxylation:6.63
1	5-H/GuHCl-D	GuHCl	5 mL/g	Solubilization	Dialysis	2	2	4	Collagen I, alpha 1	Collagen alpha-1(I) chain OS=Gallus gallus GN=COL1A1 PE=1 SV=3	P02457|CO1A1_CHICK	K.GSP(+15.99)GADGPIGAP(+15.99)GTP(+15.99)GPQGIAGQR.G	Y	30.4	2162.04	24	1.9	1082.03	2	16.39		F14:222	2	924	947	Oxidation or Hydroxylation	P3:Oxidation or Hydroxylation:0.00;P12:Oxidation or Hydroxylation:52.86;P15:Oxidation or Hydroxylation:9.16
1	5-H/GuHCl-D	GuHCl	5 mL/g	Solubilization	Dialysis	2	2	4	Collagen I, alpha 1	Collagen alpha-1(I) chain OS=Gallus gallus GN=COL1A1 PE=1 SV=3	P02457|CO1A1_CHICK	R.GLTGPIGPPGPAGAPGDK(+42.01)GE(+21.98)AGPPGPAGPTGAR.G	Y	15.92	2894.43	33	-3.5	965.813	3	16.42		F14:223	1	753	785	Acetylation (K); Sodium adduct	K18:Acetylation (K):1000.00;E20:Sodium adduct:7.77
1	5-H/GuHCl-D	GuHCl	5 mL/g	Solubilization	Dialysis	2	2	4	Collagen I, alpha 1	Collagen alpha-1(I) chain OS=Gallus gallus GN=COL1A1 PE=1 SV=3	P02457|CO1A1_CHICK	K.Q(+42.01)GPSGASGERGPP(+15.99)GPMGPPGLAGPP(+15.99)GEAGR.E	Y	24.9	2768.29	30	2.2	923.774	3	16.56		F14:228	1	974	1003	Acetylation (N-term); Oxidation or Hydroxylation	Q1:Acetylation (N-term):1000.00;P13:Oxidation or Hydroxylation:0.00;P25:Oxidation or Hydroxylation:0.00
1	5-H/GuHCl-D	GuHCl	5 mL/g	Solubilization	Dialysis	2	2	4	Collagen I, alpha 1	Collagen alpha-1(I) chain OS=Gallus gallus GN=COL1A1 PE=1 SV=3	P02457|CO1A1_CHICK	R.GLTGPIGPPGPAGAPGD(+21.98)K(+42.01)GEAGPPGPAGPTGAR.G	Y	15.58	2894.43	33	-2.8	965.814	3	16.7		F14:233	1	753	785	Sodium adduct; Acetylation (K)	D17:Sodium adduct:7.77;K18:Acetylation (K):1000.00
1	5-H/GuHCl-D	GuHCl	5 mL/g	Solubilization	Dialysis	2	2	4	Collagen I, alpha 1	Collagen alpha-1(I) chain OS=Gallus gallus GN=COL1A1 PE=1 SV=3	P02457|CO1A1_CHICK	R.GLTGPIGPP(+15.99)GPAGAPGD(+15.99)KGEAGPP(+15.99)GPAGPTGAR.G	Y	41.19	2878.42	33	1.8	960.483	3	16.91		F14:240	6	753	785	Oxidation or Hydroxylation	P9:Oxidation or Hydroxylation:26.31;D17:Oxidation or Hydroxylation:16.36;P24:Oxidation or Hydroxylation:22.85
1	5-H/GuHCl-D	GuHCl	5 mL/g	Solubilization	Dialysis	2	2	4	Collagen I, alpha 1	Collagen alpha-1(I) chain OS=Gallus gallus GN=COL1A1 PE=1 SV=3	P02457|CO1A1_CHICK	R.GPPGP(+15.99)MGPP(+15.99)GLAGP(+15.99)PGEAGR.E	Y	18.2	1815.86	20	1.5	908.937	2	17.34		F14:255	1	984	1003	Oxidation or Hydroxylation	P5:Oxidation or Hydroxylation:0.00;P9:Oxidation or Hydroxylation:11.06;P14:Oxidation or Hydroxylation:7.21
1	5-H/GuHCl-D	GuHCl	5 mL/g	Solubilization	Dialysis	2	2	4	Collagen I, alpha 1	Collagen alpha-1(I) chain OS=Gallus gallus GN=COL1A1 PE=1 SV=3	P02457|CO1A1_CHICK	R.GFSGLQGPP(+15.99)GPPGAP(+15.99)GEQGPSGASGPAGPR.G	Y	51.95	2672.26	30	1.8	1337.14	2	19.57	14900000	F14:332	4	1101	1130	Oxidation or Hydroxylation	P9:Oxidation or Hydroxylation:50.34;P15:Oxidation or Hydroxylation:118.90
1	5-H/GuHCl-D	GuHCl	5 mL/g	Solubilization	Dialysis	2	2	4	Collagen I, alpha 1	Collagen alpha-1(I) chain OS=Gallus gallus GN=COL1A1 PE=1 SV=3	P02457|CO1A1_CHICK	K.DGLNGLP(+15.99)GPIGPP(+31.99)GPR.G	Y	22.31	1560.79	16	0.8	781.403	2	20.36		F14:357	1	1142	1157	Oxidation or Hydroxylation; Dihydroxy	P7:Oxidation or Hydroxylation:26.31;P13:Dihydroxy:0.00
1	5-H/GuHCl-D	GuHCl	5 mL/g	Solubilization	Dialysis	1	1	1	Collagen I, alpha 2	Collagen alpha-2(I) chain OS=Gallus gallus GN=COL1A2 PE=4 SV=1	tr|F1P0H9|F1P0H9_CHICK	R.GASGPVGAKGPN(+.98)GDAGR(+15.99)PGEPGLM(+15.99)GPR.G	Y	31.97	2491.19	27	0.9	623.805	4	14.46		F13:160	1	423	449	Deamidation (NQ); Oxidation or Hydroxylation; Oxidation (M)	N12:Deamidation (NQ):1000.00;R17:Oxidation or Hydroxylation:0.00;M24:Oxidation (M):1000.00
1	5-H/GuHCl-D	GuHCl	5 mL/g	Solubilization	Dialysis	1	1	1	Collagen I, alpha 2	Collagen alpha-2(I) chain OS=Gallus gallus GN=COL1A2 PE=4 SV=1	tr|F1P0H9|F1P0H9_CHICK	R.GASGPVGAKGPN(+.98)GDAGRP(+15.99)GEPGLM(+15.99)GPR.G	Y	36.03	2491.19	27	0.9	831.404	3	14.58		F13:164	1	423	449	Deamidation (NQ); Oxidation or Hydroxylation; Oxidation (M)	N12:Deamidation (NQ):1000.00;P18:Oxidation or Hydroxylation:19.05;M24:Oxidation (M):1000.00
1	5-H/GuHCl-D	GuHCl	5 mL/g	Solubilization	Dialysis	1	1	1	Collagen I, alpha 2	Collagen alpha-2(I) chain OS=Gallus gallus GN=COL1A2 PE=4 SV=1	tr|F1P0H9|F1P0H9_CHICK	R.VGP(+15.99)P(+15.99)GPAGITGP(+15.99)PGPPGP(+15.99)AGKDGPR.G	Y	23.26	2266.13	25	1.2	756.386	3	15.03		F13:178	1	794	818	Oxidation or Hydroxylation	P3:Oxidation or Hydroxylation:38.16;P4:Oxidation or Hydroxylation:26.31;P12:Oxidation or Hydroxylation:0.00;P18:Oxidation or Hydroxylation:0.00
1	5-H/GuHCl-D	GuHCl	5 mL/g	Solubilization	Dialysis	1	1	1	Collagen I, alpha 2	Collagen alpha-2(I) chain OS=Gallus gallus GN=COL1A2 PE=4 SV=1	tr|F1P0H9|F1P0H9_CHICK	R.GLHGEFGVP(+15.99)GPAGPRGER.G	Y	33.7	1804.9	18	0.7	602.64	3	15.09		F13:180	1	573	590	Oxidation or Hydroxylation	P9:Oxidation or Hydroxylation:0.00
1	5-H/GuHCl-D	GuHCl	5 mL/g	Solubilization	Dialysis	1	1	1	Collagen I, alpha 2	Collagen alpha-2(I) chain OS=Gallus gallus GN=COL1A2 PE=4 SV=1	tr|F1P0H9|F1P0H9_CHICK	V.P(+15.99)GPAGPRGER.G	Y	25.71	1008.51	10	0.5	505.262	2	15.26		F13:185	1	581	590	Oxidation or Hydroxylation	P1:Oxidation or Hydroxylation:22.85
1	5-H/GuHCl-D	GuHCl	5 mL/g	Solubilization	Dialysis	1	1	1	Collagen I, alpha 2	Collagen alpha-2(I) chain OS=Gallus gallus GN=COL1A2 PE=4 SV=1	tr|F1P0H9|F1P0H9_CHICK	R.VGP(+15.99)P(+15.99)GPAGITGPP(+15.99)GPP(+15.99)GPAGK.D	Y	28.29	1840.93	21	1.4	921.475	2	15.91		F13:206	3	794	814	Oxidation or Hydroxylation	P3:Oxidation or Hydroxylation:38.16;P4:Oxidation or Hydroxylation:26.31;P13:Oxidation or Hydroxylation:17.01;P16:Oxidation or Hydroxylation:17.01
1	5-H/GuHCl-D	GuHCl	5 mL/g	Solubilization	Dialysis	1	1	1	Collagen I, alpha 2	Collagen alpha-2(I) chain OS=Gallus gallus GN=COL1A2 PE=4 SV=1	tr|F1P0H9|F1P0H9_CHICK	R.GLP(+15.99)GAIGAP(+15.99)GPAGGAGDRGEGGPAGPAGPAGAR.G	Y	32.38	2724.33	33	1.2	909.119	3	16.41		F13:223	5	675	707	Oxidation or Hydroxylation	P3:Oxidation or Hydroxylation:113.22;P9:Oxidation or Hydroxylation:22.85
1	5-H/GuHCl-D	GuHCl	5 mL/g	Solubilization	Dialysis	1	1	1	Collagen I, alpha 2	Collagen alpha-2(I) chain OS=Gallus gallus GN=COL1A2 PE=4 SV=1	tr|F1P0H9|F1P0H9_CHICK	R.VGP(+15.99)P(+15.99)GPAGITGP(+15.99)P(+15.99)GPPGPAGKD.G	Y	19.27	1955.96	22	1.2	978.988	2	16.47		F13:225	1	794	815	Oxidation or Hydroxylation	P3:Oxidation or Hydroxylation:56.34;P4:Oxidation or Hydroxylation:18.53;P12:Oxidation or Hydroxylation:0.00;P13:Oxidation or Hydroxylation:0.00
1	5-H/GuHCl-D	GuHCl	5 mL/g	Solubilization	Dialysis	1	1	1	Collagen I, alpha 2	Collagen alpha-2(I) chain OS=Gallus gallus GN=COL1A2 PE=4 SV=1	tr|F1P0H9|F1P0H9_CHICK	R.GLP(+15.99)GESGAVGPAGPIGSR.G	Y	32.44	1593.81	18	1.4	797.914	2	17.99		F13:277	1	591	608	Oxidation or Hydroxylation	P3:Oxidation or Hydroxylation:66.64
1	5-H/GuHCl-D	GuHCl	5 mL/g	Solubilization	Dialysis	1	1	1	Collagen I, alpha 2	Collagen alpha-2(I) chain OS=Gallus gallus GN=COL1A2 PE=4 SV=1	tr|F1P0H9|F1P0H9_CHICK	K.GETGPAGPP(+15.99)GFQGLP(+15.99)GPSGPAGEAGKP(+15.99)GER.G	Y	53.65	2776.31	30	1	926.443	3	18.38		F13:291	4	543	572	Oxidation or Hydroxylation	P9:Oxidation or Hydroxylation:46.31;P15:Oxidation or Hydroxylation:56.41;P27:Oxidation or Hydroxylation:58.64
1	5-H/GuHCl-D	GuHCl	5 mL/g	Solubilization	Dialysis	1	1	1	Collagen I, alpha 2	Collagen alpha-2(I) chain OS=Gallus gallus GN=COL1A2 PE=4 SV=1	tr|F1P0H9|F1P0H9_CHICK	R.NGLP(+15.99)GPIGPAGVR.G	Y	20.56	1219.67	13	1.1	610.842	2	18.55		F13:297	2	1067	1079	Oxidation or Hydroxylation	P4:Oxidation or Hydroxylation:14.04
1	5-H/GuHCl-D	GuHCl	5 mL/g	Solubilization	Dialysis	1	1	1	Collagen I, alpha 2	Collagen alpha-2(I) chain OS=Gallus gallus GN=COL1A2 PE=4 SV=1	tr|F1P0H9|F1P0H9_CHICK	R.VGPIGPAGNRGEP(+15.99)GNIGFP(+15.99)GPK.G	Y	33.38	2119.08	22	0.9	707.368	3	18.58	286000000	F13:298	1	476	497	Oxidation or Hydroxylation	P13:Oxidation or Hydroxylation:8.22;P19:Oxidation or Hydroxylation:12.28
1	5-H/GuHCl-D	GuHCl	5 mL/g	Solubilization	Dialysis	1	1	1	Collagen I, alpha 2	Collagen alpha-2(I) chain OS=Gallus gallus GN=COL1A2 PE=4 SV=1	tr|F1P0H9|F1P0H9_CHICK	R.VGPIGPAGNRGEP(+15.99)GNIGFPGP(+15.99)K.G	Y	40.25	2119.08	22	0.7	1060.55	2	18.81	24400000	F13:306	2	476	497	Oxidation or Hydroxylation	P13:Oxidation or Hydroxylation:26.31;P21:Oxidation or Hydroxylation:0.00
1	5-H/GuHCl-D	GuHCl	5 mL/g	Solubilization	Dialysis	1	1	1	Collagen I, alpha 2	Collagen alpha-2(I) chain OS=Gallus gallus GN=COL1A2 PE=4 SV=1	tr|F1P0H9|F1P0H9_CHICK	K.GAAGLP(+15.99)GVAGAP(+15.99)GLP(+15.99)GPR.G	Y	32.43	1561.82	18	1.2	781.919	2	19.29		F13:323	1	309	326	Oxidation or Hydroxylation	P6:Oxidation or Hydroxylation:88.86;P12:Oxidation or Hydroxylation:22.07;P15:Oxidation or Hydroxylation:0.00
1	5-H/GuHCl-D	GuHCl	5 mL/g	Solubilization	Dialysis	1	1	1	Collagen I, alpha 2	Collagen alpha-2(I) chain OS=Gallus gallus GN=COL1A2 PE=4 SV=1	tr|F1P0H9|F1P0H9_CHICK	K.GAAGLP(+15.99)GVAGAP(+15.99)GLPGP(+15.99)R.G	Y	36.68	1561.82	18	1.2	781.919	2	19.53		F13:331	2	309	326	Oxidation or Hydroxylation	P6:Oxidation or Hydroxylation:123.34;P12:Oxidation or Hydroxylation:19.05;P17:Oxidation or Hydroxylation:0.00
1	5-H/GuHCl-D	GuHCl	5 mL/g	Solubilization	Dialysis	1	1	1	Collagen I, alpha 2	Collagen alpha-2(I) chain OS=Gallus gallus GN=COL1A2 PE=4 SV=1	tr|F1P0H9|F1P0H9_CHICK	K.GP(+15.99)KGETGPTGAIGPIGASGPP(+15.99)GPVGAAGPAGPR.G	Y	51.62	2836.45	33	1.2	946.491	3	19.55		F13:332	3	744	776	Oxidation or Hydroxylation	P2:Oxidation or Hydroxylation:0.00;P21:Oxidation or Hydroxylation:64.00
1	5-H/GuHCl-D	GuHCl	5 mL/g	Solubilization	Dialysis	1	1	1	Collagen I, alpha 2	Collagen alpha-2(I) chain OS=Gallus gallus GN=COL1A2 PE=4 SV=1	tr|F1P0H9|F1P0H9_CHICK	K.GPKGETGPTGAIGPIGASGPP(+15.99)GPVGAAGPAGPR.G	Y	49.35	2820.45	33	1	941.159	3	19.58		F13:333	3	744	776	Oxidation or Hydroxylation	P21:Oxidation or Hydroxylation:71.60
1	5-H/GuHCl-D	GuHCl	5 mL/g	Solubilization	Dialysis	1	1	1	Collagen I, alpha 2	Collagen alpha-2(I) chain OS=Gallus gallus GN=COL1A2 PE=4 SV=1	tr|F1P0H9|F1P0H9_CHICK	R.GSDGSAGPTGPAGPIGAAGPP(+15.99)GFP(+15.99)GAPGAK(+15.99).G	Y	51.29	2520.19	30	1.5	1261.1	2	20.76		F13:371	1	234	263	Oxidation or Hydroxylation	P21:Oxidation or Hydroxylation:110.43;P24:Oxidation or Hydroxylation:150.82;K30:Oxidation or Hydroxylation:166.52
1	5-H/GuHCl-D	GuHCl	5 mL/g	Solubilization	Dialysis	1	1	1	Collagen I, alpha 2	Collagen alpha-2(I) chain OS=Gallus gallus GN=COL1A2 PE=4 SV=1	tr|F1P0H9|F1P0H9_CHICK	R.N(+.98)GLP(+15.99)GPIGPAGVR.G	Y	42.19	1220.65	13	1.2	611.334	2	21.13		F13:382	3	1067	1079	Deamidation (NQ); Oxidation or Hydroxylation	N1:Deamidation (NQ):1000.00;P4:Oxidation or Hydroxylation:60.92
1	5-H/GuHCl-D	GuHCl	5 mL/g	Solubilization	Dialysis	1	1	1	Collagen I, alpha 2	Collagen alpha-2(I) chain OS=Gallus gallus GN=COL1A2 PE=4 SV=1	tr|F1P0H9|F1P0H9_CHICK	R.GSDGSAGPTGPAGPIGAAGPP(+15.99)GFP(+15.99)GAP(+15.99)GAK.G	Y	46.59	2520.19	30	1.4	1261.1	2	21.15		F13:383	2	234	263	Oxidation or Hydroxylation	P21:Oxidation or Hydroxylation:104.64;P24:Oxidation or Hydroxylation:132.72;P27:Oxidation or Hydroxylation:115.60
1	5-H/GuHCl-D	GuHCl	5 mL/g	Solubilization	Dialysis	1	1	1	Collagen I, alpha 2	Collagen alpha-2(I) chain OS=Gallus gallus GN=COL1A2 PE=4 SV=1	tr|F1P0H9|F1P0H9_CHICK	D.P(+15.99)GPVGPVGPAGAFGPR.G	Y	39.06	1447.76	16	0.7	724.886	2	21.82		F13:403	2	980	995	Oxidation or Hydroxylation	P1:Oxidation or Hydroxylation:20.41
1	5-H/GuHCl-D	GuHCl	5 mL/g	Solubilization	Dialysis	1	1	1	Collagen I, alpha 2	Collagen alpha-2(I) chain OS=Gallus gallus GN=COL1A2 PE=4 SV=1	tr|F1P0H9|F1P0H9_CHICK	K.GETGPTGAIGPIGASGPP(+15.99)GPVGAAGPAGPR.G	Y	49.72	2538.28	30	1.4	1270.15	2	21.93		F13:407	3	747	776	Oxidation or Hydroxylation	P18:Oxidation or Hydroxylation:58.11
1	5-H/GuHCl-D	GuHCl	5 mL/g	Solubilization	Dialysis	1	1	1	Collagen I, alpha 2	Collagen alpha-2(I) chain OS=Gallus gallus GN=COL1A2 PE=4 SV=1	tr|F1P0H9|F1P0H9_CHICK	R.GDP(+15.99)GPVGPVGPAGAFGPR.G	Y	48.01	1619.81	18	0.7	810.911	2	22.1		F13:412	4	978	995	Oxidation or Hydroxylation	P3:Oxidation or Hydroxylation:10.11
1	5-H/GuHCl-D	GuHCl	5 mL/g	Solubilization	Dialysis	1	1	1	Collagen I, alpha 2	Collagen alpha-2(I) chain OS=Gallus gallus GN=COL1A2 PE=4 SV=1	tr|F1P0H9|F1P0H9_CHICK	R.GFP(+15.99)GTP(+15.99)GLP(+15.99)GFK.G	Y	34.34	1221.6	12	0.8	611.809	2	22.4		F13:422	3	165	176	Oxidation or Hydroxylation	P3:Oxidation or Hydroxylation:17.01;P6:Oxidation or Hydroxylation:30.64;P9:Oxidation or Hydroxylation:0.00
1	5-H/GuHCl-D	GuHCl	5 mL/g	Solubilization	Dialysis	1	1	1	Collagen I, alpha 2	Collagen alpha-2(I) chain OS=Gallus gallus GN=COL1A2 PE=4 SV=1	tr|F1P0H9|F1P0H9_CHICK	R.GDPGPVGPVGPAGAFGPR.G	Y	47.75	1603.81	18	1.4	802.914	2	22.64		F13:430	3	978	995
1	5-H/GuHCl-D	GuHCl	5 mL/g	Solubilization	Dialysis	1	1	1	Collagen I, alpha 2	Collagen alpha-2(I) chain OS=Gallus gallus GN=COL1A2 PE=4 SV=1	tr|F1P0H9|F1P0H9_CHICK	R.GLP(+15.99)GIAGATGEPGP(+15.99)LGVSGPPGAR(+15.99).G	Y	23.4	2132.09	24	0.6	711.703	3	22.95		F13:440	1	882	905	Oxidation or Hydroxylation	P3:Oxidation or Hydroxylation:60.15;P14:Oxidation or Hydroxylation:0.00;R24:Oxidation or Hydroxylation:8.26
1	5-H/GuHCl-D	GuHCl	5 mL/g	Solubilization	Dialysis	1	1	1	Collagen I, alpha 2	Collagen alpha-2(I) chain OS=Gallus gallus GN=COL1A2 PE=4 SV=1	tr|F1P0H9|F1P0H9_CHICK	K.GETGPTGAIGPIGASGPP(+15.99)GPVGAAGPAGPRGDAGPP(+15.99)GMTGFPGAAGR(+15.99).V	Y	54.39	4066.96	47	-2.6	1356.66	3	23.39		F13:453	1	747	793	Oxidation or Hydroxylation	P18:Oxidation or Hydroxylation:47.75;P36:Oxidation or Hydroxylation:45.37;R47:Oxidation or Hydroxylation:47.83
1	5-H/GuHCl-D	GuHCl	5 mL/g	Solubilization	Dialysis	1	1	1	Collagen I, alpha 2	Collagen alpha-2(I) chain OS=Gallus gallus GN=COL1A2 PE=4 SV=1	tr|F1P0H9|F1P0H9_CHICK	R.GLP(+15.99)GIAGATGEP(+15.99)GPLGVSGP(+15.99)PGAR.G	Y	40.19	2132.09	24	1.2	1067.05	2	23.57		F13:457	3	882	905	Oxidation or Hydroxylation	P3:Oxidation or Hydroxylation:116.29;P12:Oxidation or Hydroxylation:20.41;P20:Oxidation or Hydroxylation:0.00
1	5-H/GuHCl-D	GuHCl	5 mL/g	Solubilization	Dialysis	1	1	1	Collagen I, alpha 2	Collagen alpha-2(I) chain OS=Gallus gallus GN=COL1A2 PE=4 SV=1	tr|F1P0H9|F1P0H9_CHICK	R.GLP(+15.99)GIAGATGEPGPLGVSGP(+15.99)PGAR.G	Y	42.77	2116.09	24	1.3	1059.05	2	23.88		F13:466	3	882	905	Oxidation or Hydroxylation	P3:Oxidation or Hydroxylation:107.04;P20:Oxidation or Hydroxylation:0.00
1	5-H/GuHCl-D	GuHCl	5 mL/g	Solubilization	Dialysis	1	1	1	Collagen I, alpha 2	Collagen alpha-2(I) chain OS=Gallus gallus GN=COL1A2 PE=4 SV=1	tr|F1P0H9|F1P0H9_CHICK	R.GLP(+15.99)GIAGATGEPGPLGVSGPP(+15.99)GAR.G	Y	37.24	2116.09	24	0.7	706.371	3	23.91		F13:467	1	882	905	Oxidation or Hydroxylation	P3:Oxidation or Hydroxylation:85.33;P21:Oxidation or Hydroxylation:0.00
1	5-H/GuHCl-D	GuHCl	5 mL/g	Solubilization	Dialysis	1	1	1	Collagen I, alpha 2	Collagen alpha-2(I) chain OS=Gallus gallus GN=COL1A2 PE=4 SV=1	tr|F1P0H9|F1P0H9_CHICK	D.FGPGPM(+15.99)GLM(+15.99)GPR.G	Y	37.79	1247.58	12	0.3	624.797	2	26.05		F13:521	2	87	98	Oxidation (M)	M6:Oxidation (M):1000.00;M9:Oxidation (M):1000.00
1	5-H/GuHCl-D	GuHCl	5 mL/g	Solubilization	Dialysis	1	1	1	Collagen I, alpha 2	Collagen alpha-2(I) chain OS=Gallus gallus GN=COL1A2 PE=4 SV=1	tr|F1P0H9|F1P0H9_CHICK	D.FGPGPMGLM(+15.99)GPR.G	Y	38.6	1231.58	12	0.4	616.8	2	26.11		F13:523	2	87	98	Oxidation (M)	M9:Oxidation (M):24.60
1	5-H/GuHCl-D	GuHCl	5 mL/g	Solubilization	Dialysis	1	1	1	Collagen I, alpha 2	Collagen alpha-2(I) chain OS=Gallus gallus GN=COL1A2 PE=4 SV=1	tr|F1P0H9|F1P0H9_CHICK	D.FGPGPMGLMGPR.G	Y	42.66	1215.59	12	0.2	608.802	2	26.4		F13:530	3	87	98
1	5-H/GuHCl-D	GuHCl	5 mL/g	Solubilization	Dialysis	1	1	1	Collagen I, alpha 2	Collagen alpha-2(I) chain OS=Gallus gallus GN=COL1A2 PE=4 SV=1	tr|F1P0H9|F1P0H9_CHICK	K.AADFGPGPMGLMGPR.G	Y	49.32	1472.69	15	1.6	737.354	2	26.86		F13:542	4	84	98
1	5-H/GuHCl-D	GuHCl	5 mL/g	Solubilization	Dialysis	1	1	1	Collagen I, alpha 2	Collagen alpha-2(I) chain OS=Gallus gallus GN=COL1A2 PE=4 SV=1	tr|F1P0H9|F1P0H9_CHICK	K.AADFGPGPM(+15.99)GLM(+15.99)GPR.G	Y	49.06	1504.68	15	1.3	753.348	2	27.12		F13:549	1	84	98	Oxidation (M)	M9:Oxidation (M):1000.00;M12:Oxidation (M):1000.00
1	5-H/GuHCl-D	GuHCl	5 mL/g	Solubilization	Dialysis	1	1	1	Collagen I, alpha 2	Collagen alpha-2(I) chain OS=Gallus gallus GN=COL1A2 PE=4 SV=1	tr|F1P0H9|F1P0H9_CHICK	D.PSK(-1.03)AADFGPGPMGLMGPR.G	Y	20.76	1783.84	18	1.4	892.928	2	27.98		F13:570	2	81	98	Lysine oxidation to aminoadipic semialdehyde	K3:Lysine oxidation to aminoadipic semialdehyde:1000.00
1	5-H/GuHCl-D	GuHCl	5 mL/g	Solubilization	Dialysis	1	1	1	Collagen I, alpha 2	Collagen alpha-2(I) chain OS=Gallus gallus GN=COL1A2 PE=4 SV=1	tr|F1P0H9|F1P0H9_CHICK	A.Q(-17.03)YDPSK(+15.99)AADFGPGPMGLMGPR.G	Y	35.5	2189.99	21	1.7	1096	2	29.02		F13:592	3	78	98	Pyro-glu from Q; Oxidation or Hydroxylation	Q1:Pyro-glu from Q:1000.00;K6:Oxidation or Hydroxylation:26.31
1	5-H/GuHCl-D	GuHCl	5 mL/g	Solubilization	Dialysis	1	1	1	Collagen I, alpha 2	Collagen alpha-2(I) chain OS=Gallus gallus GN=COL1A2 PE=4 SV=1	tr|F1P0H9|F1P0H9_CHICK	R.TNKPSRLPILDIAPLDIGGADQEFGLHIGPVC(+57.02)FK	Y	13.98	3687.94	34	1.2	738.597	5	33.7		F13:677	1	1330	1363	Carbamidomethylation	C32:Carbamidomethylation:1000.00
1	5-H/GuHCl-D	GuHCl	5 mL/g	Solubilization	Dialysis	1	1	1	Collagen I, alpha 2	Collagen alpha-2(I) chain OS=Gallus gallus GN=COL1A2 PE=4 SV=1	tr|F1P0H9|F1P0H9_CHICK	R.LPILDIAPLDIGGADQEFGLHIGPVC(+57.02)FK	Y	33.45	3004.57	28	2	1002.53	3	37.25		F13:728	1	1336	1363	Carbamidomethylation	C26:Carbamidomethylation:1000.00
1	5-H/GuHCl-D	GuHCl	5 mL/g	Solubilization	Dialysis	2	1	1	Collagen I, alpha 2	Collagen alpha-2(I) chain OS=Gallus gallus GN=COL1A2 PE=4 SV=1	tr|F1P0H9|F1P0H9_CHICK	R.GASGPVGAKGPN(+.98)GDAGR(+15.99)P(+15.99)GEPGLMGPR.G	Y	37.17	2491.19	27	0.8	623.805	4	14.51		F14:159	1	423	449	Deamidation (NQ); Oxidation or Hydroxylation	N12:Deamidation (NQ):1000.00;R17:Oxidation or Hydroxylation:8.26;P18:Oxidation or Hydroxylation:9.42
1	5-H/GuHCl-D	GuHCl	5 mL/g	Solubilization	Dialysis	2	1	1	Collagen I, alpha 2	Collagen alpha-2(I) chain OS=Gallus gallus GN=COL1A2 PE=4 SV=1	tr|F1P0H9|F1P0H9_CHICK	R.GLHGEFGVPGPAGPR(+15.99)GER.G	Y	30.96	1804.9	18	0.7	602.64	3	15.17		F14:181	1	573	590	Oxidation or Hydroxylation	R15:Oxidation or Hydroxylation:0.00
1	5-H/GuHCl-D	GuHCl	5 mL/g	Solubilization	Dialysis	2	1	1	Collagen I, alpha 2	Collagen alpha-2(I) chain OS=Gallus gallus GN=COL1A2 PE=4 SV=1	tr|F1P0H9|F1P0H9_CHICK	R.VGP(+15.99)P(+15.99)GPAGITGPP(+15.99)GPPGPAGK(+15.99).D	Y	13.51	1840.93	21	1.4	921.475	2	15.82		F14:202	1	794	814	Oxidation or Hydroxylation	P3:Oxidation or Hydroxylation:28.36;P4:Oxidation or Hydroxylation:14.04;P13:Oxidation or Hydroxylation:14.02;K21:Oxidation or Hydroxylation:0.00
1	5-H/GuHCl-D	GuHCl	5 mL/g	Solubilization	Dialysis	2	1	1	Collagen I, alpha 2	Collagen alpha-2(I) chain OS=Gallus gallus GN=COL1A2 PE=4 SV=1	tr|F1P0H9|F1P0H9_CHICK	R.GLHGEFGVP(+15.99)GPAGPR.G	Y	23.42	1462.73	15	0.3	488.585	3	16.73		F14:234	1	573	587	Oxidation or Hydroxylation	P9:Oxidation or Hydroxylation:32.28
1	5-H/GuHCl-D	GuHCl	5 mL/g	Solubilization	Dialysis	2	1	1	Collagen I, alpha 2	Collagen alpha-2(I) chain OS=Gallus gallus GN=COL1A2 PE=4 SV=1	tr|F1P0H9|F1P0H9_CHICK	R.VGPIGPAGNRGEPGN(+15.99)IGFP(+15.99)GPK.G	Y	32.51	2119.08	22	0.8	707.368	3	18.3		F14:288	2	476	497	Oxidation or Hydroxylation	N15:Oxidation or Hydroxylation:0.00;P19:Oxidation or Hydroxylation:0.00
1	5-H/GuHCl-D	GuHCl	5 mL/g	Solubilization	Dialysis	2	1	1	Collagen I, alpha 2	Collagen alpha-2(I) chain OS=Gallus gallus GN=COL1A2 PE=4 SV=1	tr|F1P0H9|F1P0H9_CHICK	R.VGPIGPAGNRGEP(+15.99)GNIGFPGPK(+15.99).G	Y	30.01	2119.08	22	1	707.368	3	18.48		F14:294	1	476	497	Oxidation or Hydroxylation	P13:Oxidation or Hydroxylation:9.40;K22:Oxidation or Hydroxylation:0.00
1	5-H/GuHCl-D	GuHCl	5 mL/g	Solubilization	Dialysis	2	1	1	Collagen I, alpha 2	Collagen alpha-2(I) chain OS=Gallus gallus GN=COL1A2 PE=4 SV=1	tr|F1P0H9|F1P0H9_CHICK	K.GAAGLP(+15.99)GVAGAP(+15.99)GLPGPR(+15.99).G	Y	26.73	1561.82	18	1.2	781.919	2	19.27	276000000	F14:321	1	309	326	Oxidation or Hydroxylation	P6:Oxidation or Hydroxylation:106.84;P12:Oxidation or Hydroxylation:19.05;R18:Oxidation or Hydroxylation:0.00
1	5-H/GuHCl-D	GuHCl	5 mL/g	Solubilization	Dialysis	2	1	1	Collagen I, alpha 2	Collagen alpha-2(I) chain OS=Gallus gallus GN=COL1A2 PE=4 SV=1	tr|F1P0H9|F1P0H9_CHICK	K.GPKGETGPTGAIGPIGASGPP(+15.99)GPVGAAGPAGPRGDAGP(+15.99)PGMTGFP(+15.99)GAAGR.V	Y	50.57	4349.12	50	2.4	1088.29	4	21.6		F14:397	1	744	793	Oxidation or Hydroxylation	P21:Oxidation or Hydroxylation:93.44;P38:Oxidation or Hydroxylation:18.61;P45:Oxidation or Hydroxylation:15.57
1	5-H/GuHCl-D	GuHCl	5 mL/g	Solubilization	Dialysis	2	1	1	Collagen I, alpha 2	Collagen alpha-2(I) chain OS=Gallus gallus GN=COL1A2 PE=4 SV=1	tr|F1P0H9|F1P0H9_CHICK	R.GDN(sub P)GPVGPVGPAGAFGPR.G	Y	32.06	1620.8	18	5.5	811.412	2	21.81		F14:403	1	978	995	Mutation
1	5-H/GuHCl-D	GuHCl	5 mL/g	Solubilization	Dialysis	2	1	1	Collagen I, alpha 2	Collagen alpha-2(I) chain OS=Gallus gallus GN=COL1A2 PE=4 SV=1	tr|F1P0H9|F1P0H9_CHICK	D.PGPVGPVGPAGAFGPR.G	Y	37.79	1431.76	16	0.7	716.889	2	21.95		F14:408	4	980	995
1	5-H/GuHCl-D	GuHCl	5 mL/g	Solubilization	Dialysis	2	1	1	Collagen I, alpha 2	Collagen alpha-2(I) chain OS=Gallus gallus GN=COL1A2 PE=4 SV=1	tr|F1P0H9|F1P0H9_CHICK	D.PGPVGPVGPAGAF(+15.99)GPR.G	Y	22.73	1447.76	16	0.5	724.886	2	22.15		F14:415	1	980	995	Oxidation or Hydroxylation	F13:Oxidation or Hydroxylation:0.00
1	5-H/GuHCl-D	GuHCl	5 mL/g	Solubilization	Dialysis	2	1	1	Collagen I, alpha 2	Collagen alpha-2(I) chain OS=Gallus gallus GN=COL1A2 PE=4 SV=1	tr|F1P0H9|F1P0H9_CHICK	R.GFP(+15.99)GTP(+15.99)GLPGF(+15.99)K.G	Y	31.26	1221.6	12	0.4	611.809	2	22.27		F14:418	1	165	176	Oxidation or Hydroxylation	P3:Oxidation or Hydroxylation:17.01;P6:Oxidation or Hydroxylation:38.16;F11:Oxidation or Hydroxylation:0.00
1	5-H/GuHCl-D	GuHCl	5 mL/g	Solubilization	Dialysis	2	1	1	Collagen I, alpha 2	Collagen alpha-2(I) chain OS=Gallus gallus GN=COL1A2 PE=4 SV=1	tr|F1P0H9|F1P0H9_CHICK	R.GLP(+15.99)GIAGATGEP(+15.99)GPLGVSGPPGAR(+15.99).G	Y	45.57	2132.09	24	1.4	1067.05	2	23.24		F14:447	10	882	905	Oxidation or Hydroxylation	P3:Oxidation or Hydroxylation:195.68;P12:Oxidation or Hydroxylation:36.05;R24:Oxidation or Hydroxylation:0.00
1	5-H/GuHCl-D	GuHCl	5 mL/g	Solubilization	Dialysis	2	1	1	Collagen I, alpha 2	Collagen alpha-2(I) chain OS=Gallus gallus GN=COL1A2 PE=4 SV=1	tr|F1P0H9|F1P0H9_CHICK	K.GETGPTGAIGPIGASGP(+15.99)PGPVGAAGPAGPRGDAGPP(+15.99)GMTGFPGAAGR(+15.99).V	Y	49.2	4066.96	47	1.2	1356.66	3	23.3		F14:449	1	747	793	Oxidation or Hydroxylation	P17:Oxidation or Hydroxylation:36.94;P36:Oxidation or Hydroxylation:43.24;R47:Oxidation or Hydroxylation:32.59
1	5-H/GuHCl-D	GuHCl	5 mL/g	Solubilization	Dialysis	2	1	1	Collagen I, alpha 2	Collagen alpha-2(I) chain OS=Gallus gallus GN=COL1A2 PE=4 SV=1	tr|F1P0H9|F1P0H9_CHICK	D.PSK(+15.99)AADFGPGPMGLMGPR.G	Y	38.77	1800.87	18	0.8	601.296	3	23.71		F14:460	2	81	98	Oxidation or Hydroxylation	K3:Oxidation or Hydroxylation:9.40
1	5-H/GuHCl-D	GuHCl	5 mL/g	Solubilization	Dialysis	2	1	1	Collagen I, alpha 2	Collagen alpha-2(I) chain OS=Gallus gallus GN=COL1A2 PE=4 SV=1	tr|F1P0H9|F1P0H9_CHICK	K.AADFGPGP(+15.99)MGLM(+15.99)GPR.G	Y	39.37	1504.68	15	1.2	753.348	2	26.77		F14:539	1	84	98	Oxidation or Hydroxylation; Oxidation (M)	P8:Oxidation or Hydroxylation:45.01;M12:Oxidation (M):22.45
1	5-H/GuHCl-D	GuHCl	5 mL/g	Solubilization	Dialysis	2	1	1	Collagen I, alpha 2	Collagen alpha-2(I) chain OS=Gallus gallus GN=COL1A2 PE=4 SV=1	tr|F1P0H9|F1P0H9_CHICK	K.AADFGPGPMGLM(+15.99)GPR.G	Y	40.98	1488.69	15	1	745.351	2	26.87		F14:542	1	84	98	Oxidation (M)	M12:Oxidation (M):12.66
1	5-H/GuHCl-D	GuHCl	5 mL/g	Solubilization	Dialysis	2	1	1	Collagen I, alpha 2	Collagen alpha-2(I) chain OS=Gallus gallus GN=COL1A2 PE=4 SV=1	tr|F1P0H9|F1P0H9_CHICK	A.DFGPGPMGLMGPR.G	Y	18.95	1330.62	13	0	666.315	2	28.07		F14:571	2	86	98
1	5-H/GuHCl-D	GuHCl	5 mL/g	Solubilization	Dialysis	2	1	1	Collagen I, alpha 2	Collagen alpha-2(I) chain OS=Gallus gallus GN=COL1A2 PE=4 SV=1	tr|F1P0H9|F1P0H9_CHICK	A.Q(-17.03)Y(+15.99)DPSKAADFGPGPMGLMGPR.G	Y	13.95	2189.99	21	0.4	731.003	3	29.08		F14:588	1	78	98	Pyro-glu from Q; Oxidation or Hydroxylation	Q1:Pyro-glu from Q:1000.00;Y2:Oxidation or Hydroxylation:0.00
1	5-H/GuHCl-D	GuHCl	5 mL/g	Solubilization	Dialysis	1	13	260	Collagen V, alpha 1	Alpha 1 (V) collagen OS=Gallus gallus PE=2 SV=1	tr|Q9IAU4|Q9IAU4_CHICK	R.ILDEEVFEGDIQQLLIVADPR.A	Y	21.77	2411.26	21	1.5	804.761	3	39.31		F13:746	1	208	228
1	5-H/GuHCl-D	GuHCl	5 mL/g	Solubilization	Dialysis	1	6	10	Decorin	Decorin OS=Gallus gallus GN=DCN PE=1 SV=1	P28675|PGS2_CHICK	K.IDAEGLSGLTNLAK.L	Y	45.87	1400.75	14	0.8	701.383	2	26.44		F13:531	2	234	247
1	5-H/GuHCl-D	GuHCl	5 mL/g	Solubilization	Dialysis	1	6	10	Decorin	Decorin OS=Gallus gallus GN=DCN PE=1 SV=1	P28675|PGS2_CHICK	R.KAVFNGLNQVIVLELGTNPLK.S	Y	29.49	2266.3	21	1.1	756.443	3	32.58		F13:655	3	165	185
1	5-H/GuHCl-D	GuHCl	5 mL/g	Solubilization	Dialysis	2	10	35	Lumican	Lumican OS=Gallus gallus GN=LUM PE=1 SV=1	P51890|LUM_CHICK	K.GLNSLLYLDLSFNQLTK.L	Y	15.54	1938.05	17	1.5	970.032	2	36.89		F14:712	1	187	203
1	5-H/GuHCl-D	GuHCl	5 mL/g	Solubilization	Dialysis	2	10	35	Lumican	Lumican OS=Gallus gallus GN=LUM PE=1 SV=1	P51890|LUM_CHICK	K.LPTGLPHSLLMLYFDNNQISNIPDEYFQGFK.T	Y	24.83	3610.78	31	2.3	1204.6	3	37.37		F14:717	2	204	234
1	5-H/GuHCl-D	GuHCl	5 mL/g	Solubilization	Dialysis	1	4	8	Osteonectin	SPARC OS=Gallus gallus GN=SPARC PE=4 SV=1	tr|F1P291|F1P291_CHICK	K.EQDIDKDLVI	Y	22.87	1186.61	10	0.6	594.312	2	24.94		F13:494	1	289	298
1	5-H/GuHCl-D	GuHCl	5 mL/g	Solubilization	Dialysis	1	4	8	Osteonectin	SPARC OS=Gallus gallus GN=SPARC PE=4 SV=1	tr|F1P291|F1P291_CHICK	K.NVLITLYERDEDNNLLTEK.Q	Y	35.51	2291.16	19	1.4	764.73	3	27.42		F13:558	4	168	186
1	5-H/GuHCl-D	GuHCl	5 mL/g	Solubilization	Dialysis	1	4	8	Osteonectin	SPARC OS=Gallus gallus GN=SPARC PE=4 SV=1	tr|F1P291|F1P291_CHICK	K.NYNMYIFPVHWQFGQLDQHPIDGYLSHTELAPLR.A	Y	37.32	4098.98	34	0.6	820.805	5	32.73		F13:658	2	218	251
1	5-H/GuHCl-D	GuHCl	5 mL/g	Solubilization	Dialysis	1	4	8	Osteonectin	SPARC OS=Gallus gallus GN=SPARC PE=4 SV=1	tr|F1P291|F1P291_CHICK	K.FIPAC(+57.02)LDTELTEFPLR.M	Y	48.33	1920.97	16	0.9	961.491	2	33.16		F13:664	4	146	161	Carbamidomethylation	C5:Carbamidomethylation:1000.00
1	5-H/GuHCl-D	GuHCl	5 mL/g	Solubilization	Dialysis	1	4	8	Osteonectin	SPARC OS=Gallus gallus GN=SPARC PE=4 SV=1	tr|F1P291|F1P291_CHICK	R.FFEAC(+57.02)DLDNDKYIALEEWASC(+57.02)FGIK.E	Y	17.48	3040.36	25	1.5	1014.46	3	35.86		F13:709	2	264	288	Carbamidomethylation	C5:Carbamidomethylation:1000.00;C21:Carbamidomethylation:1000.00
1	5-H/GuHCl-D	GuHCl	5 mL/g	Solubilization	Dialysis	1	4	8	Osteonectin	SPARC OS=Gallus gallus GN=SPARC PE=4 SV=1	tr|F1P291|F1P291_CHICK	R.FFEACDLDND(+57.02)KYIALEEWASC(+57.02)FGIK.E	Y	16.31	3040.36	25	4.3	1014.47	3	37.66		F13:732	1	264	288	Carbamidomethylation (DHKE X@N-term); Carbamidomethylation	D10:Carbamidomethylation (DHKE X@N-term):0.00;C21:Carbamidomethylation:1000.00
1	5-H/GuHCl-D	GuHCl	5 mL/g	Solubilization	Dialysis	2	4	8	Osteonectin	SPARC OS=Gallus gallus GN=SPARC PE=4 SV=1	tr|F1P291|F1P291_CHICK	K.NYNMYIFPVHWQFGQLDQHPIDGYLSHTELAPLRAPLIPMEHC(+57.02)TTR.F	Y	38.88	5505.66	46	4.6	1102.14	5	31.95		F14:638	4	218	263	Carbamidomethylation	C43:Carbamidomethylation:1000.00
1	5-H/GuHCl-D	GuHCl	5 mL/g	Solubilization	Dialysis	2	4	8	Osteonectin	SPARC OS=Gallus gallus GN=SPARC PE=4 SV=1	tr|F1P291|F1P291_CHICK	R.FFEACDLDNDKYIALE(+57.02)EWASC(+57.02)FGIK.E	Y	16.43	3040.36	25	1.5	1014.46	3	36.68		F14:708	1	264	288	Carbamidomethylation (DHKE X@N-term); Carbamidomethylation	E16:Carbamidomethylation (DHKE X@N-term):2.23;C21:Carbamidomethylation:1000.00
1	5-H/GuHCl-D	GuHCl	5 mL/g	Solubilization	Dialysis	1	5	19	Pigment Epithelium Derived Factor	Uncharacterized protein OS=Gallus gallus GN=SERPINF1 PE=3 SV=1	tr|E1C7H6|E1C7H6_CHICK	R.LQSLFTSPDFTK.I	Y	40.98	1382.71	12	0.7	692.362	2	26.76		F13:539	1	337	348
1	5-H/GuHCl-D	GuHCl	5 mL/g	Solubilization	Dialysis	1	5	19	Pigment Epithelium Derived Factor	Uncharacterized protein OS=Gallus gallus GN=SERPINF1 PE=3 SV=1	tr|E1C7H6|E1C7H6_CHICK	R.ALSGNTQLDLQEINNWVR.Q	Y	21.13	2070.05	18	0.9	1036.03	2	31.19		F13:635	1	166	183
1	5-H/GuHCl-D	GuHCl	5 mL/g	Solubilization	Dialysis	1	5	19	Pigment Epithelium Derived Factor	Uncharacterized protein OS=Gallus gallus GN=SERPINF1 PE=3 SV=1	tr|E1C7H6|E1C7H6_CHICK	R.ALFYDLLNKAEVHNTYKDLLASVTGPEK.S	Y	30.4	3148.64	28	1.3	788.169	4	32.05		F13:646	2	105	132
1	5-H/GuHCl-D	GuHCl	5 mL/g	Solubilization	Dialysis	1	5	19	Pigment Epithelium Derived Factor	Uncharacterized protein OS=Gallus gallus GN=SERPINF1 PE=3 SV=1	tr|E1C7H6|E1C7H6_CHICK	R.LTFPIEYHVDRPFLLVLR.D	Y	15.99	2227.25	18	0.6	557.821	4	32.21		F13:650	1	385	402
1	5-H/GuHCl-D	GuHCl	5 mL/g	Solubilization	Dialysis	1	5	19	Pigment Epithelium Derived Factor	Uncharacterized protein OS=Gallus gallus GN=SERPINF1 PE=3 SV=1	tr|E1C7H6|E1C7H6_CHICK	K.IAQLPLTEGVSAMFFLPTK.V	Y	23.28	2062.12	19	1.6	1032.07	2	37.22		F13:727	2	266	284
1	5-H/GuHCl-D	GuHCl	5 mL/g	Solubilization	Dialysis	1	5	19	Pigment Epithelium Derived Factor	Uncharacterized protein OS=Gallus gallus GN=SERPINF1 PE=3 SV=1	tr|E1C7H6|E1C7H6_CHICK	R.TATANVLLSPFSLATALSGLSLGAGER.T	Y	31.58	2616.41	27	1.3	873.146	3	41.27		F13:763	2	71	97
1	5-H/GuHCl-D	GuHCl	5 mL/g	Solubilization	Dialysis	2	5	19	Pigment Epithelium Derived Factor	Uncharacterized protein OS=Gallus gallus GN=SERPINF1 PE=3 SV=1	tr|E1C7H6|E1C7H6_CHICK	R.LTFPIEYHVDRPFLLVLRDDTTGTLLFIGK.I	Y	30.22	3488.91	30	1.7	873.236	4	35.19		F14:690	3	385	414
1	5-H/GuHCl-D	GuHCl	5 mL/g	Solubilization	Dialysis	1	7	3	Serum Albumin	Serum albumin OS=Gallus gallus GN=ALB PE=1 SV=2	P19121|ALBU_CHICK	R.SQC(+57.02)IMEAEFDEKPADLPSLVEK.Y	Y	19.78	2535.19	22	0.4	846.07	3	26.98		F13:545	1	315	336	Carbamidomethylation	C3:Carbamidomethylation:1000.00
1	5-H/GuHCl-D	GuHCl	5 mL/g	Solubilization	Dialysis	1	7	3	Serum Albumin	Serum albumin OS=Gallus gallus GN=ALB PE=1 SV=2	P19121|ALBU_CHICK	K.YVPPPFNPDMFSFDEK.L	Y	24.11	1928.87	16	1.7	965.442	2	32.12		F13:648	2	525	540
1	5-H/GuHCl-D	GuHCl	5 mL/g	Solubilization	Dialysis	1	7	3	Serum Albumin	Serum albumin OS=Gallus gallus GN=ALB PE=1 SV=2	P19121|ALBU_CHICK	K.C(+57.02)VANEDAPEC(+57.02)SKPLPSIILDEIC(+57.02)QVEK.L	Y	31.6	3113.47	27	1.3	1038.83	3	33.66		F13:676	1	80	106	Carbamidomethylation	C1:Carbamidomethylation:1000.00;C10:Carbamidomethylation:1000.00;C23:Carbamidomethylation:1000.00
1	5-H/GuHCl-D	GuHCl	5 mL/g	Solubilization	Dialysis	1	7	3	Serum Albumin	Serum albumin OS=Gallus gallus GN=ALB PE=1 SV=2	P19121|ALBU_CHICK	R.RHPFLYAPAILSFAVDFE(+57.02)HALQSCC(+57.02)K.E	Y	28.67	3076.51	26	0.8	770.134	4	38.14		F13:736	1	173	198	Carbamidomethylation (DHKE X@N-term); Carbamidomethylation	E18:Carbamidomethylation (DHKE X@N-term):0.00;C25:Carbamidomethylation:1000.00
1	5-H/GuHCl-D	GuHCl	5 mL/g	Solubilization	Dialysis	2	7	3	Serum Albumin	Serum albumin OS=Gallus gallus GN=ALB PE=1 SV=2	P19121|ALBU_CHICK	K.CVANE(+57.02)DAPEC(+57.02)SKPLPSIILDEIC(+57.02)QVEK.L	Y	15.83	3113.47	27	1.8	1038.83	3	33.73		F14:668	1	80	106	Carbamidomethylation (DHKE X@N-term); Carbamidomethylation	E5:Carbamidomethylation (DHKE X@N-term):0.00;C10:Carbamidomethylation:1000.00;C23:Carbamidomethylation:1000.00
1	5-H/GuHCl-D	GuHCl	5 mL/g	Solubilization	Dialysis	1	11	616	Thrombospondin-1	Uncharacterized protein OS=Gallus gallus GN=THBS1 PE=4 SV=2	tr|F1P0J8|F1P0J8_CHICK	K.MENAELDIPIQNIFTR.D	Y	22.68	1902.95	16	0.8	952.484	2	32.6		F13:656	2	179	194
1	5-H/GuHCl-D	GuHCl	5 mL/g	Solubilization	Dialysis	1	8	20	Vitronectin	Vitronectin OS=Gallus gallus PE=2 SV=1	tr|O12945|O12945_CHICK	K.LISDVWGIEGPIDAAFTR.I	Y	37.81	1959.01	18	1.9	980.514	2	35.05		F13:698	3	193	210
1	5-H/GuHCl-P	GuHCl	5 mL/g	Solubilization	Precipitation	2	9	7	Alpha-2-HS-glycoprotein	Uncharacterized protein OS=Gallus gallus GN=AHSG PE=4 SV=1	tr|E1BZE1|E1BZE1_CHICK	K.NPDVYLM(+15.99)LLEIGR.A	Y	36.9	1547.8	13	0.6	774.909	2	32.72		F16:641	1	172	184	Oxidation (M)	M7:Oxidation (M):1000.00
1	5-H/GuHCl-P	GuHCl	5 mL/g	Solubilization	Precipitation	1	6	618	Collagen XI, alpha 1	Uncharacterized protein OS=Gallus gallus GN=COL11A1 PE=4 SV=2	tr|F1P4K9|F1P4K9_CHICK	R.ILDEEVFEGEIQQLLIIADPR.A	Y	25.37	2439.29	21	0.9	814.105	3	41.54		F15:760	1	213	233
1	5-H/GuHCl-P	GuHCl	5 mL/g	Solubilization	Precipitation	1	2	4	Collagen I, alpha 1	Collagen alpha-1(I) chain OS=Gallus gallus GN=COL1A1 PE=1 SV=3	P02457|CO1A1_CHICK	R.GAP(+15.99)GPP(+15.99)GAVGAAGKDGEAGAQGPP(+15.99)GPTGPAGER.G	Y	42.07	2855.34	33	2.1	952.79	3	13.1		F15:132	2	588	620	Oxidation or Hydroxylation	P3:Oxidation or Hydroxylation:32.28;P6:Oxidation or Hydroxylation:17.01;P24:Oxidation or Hydroxylation:94.89
1	5-H/GuHCl-P	GuHCl	5 mL/g	Solubilization	Precipitation	1	2	4	Collagen I, alpha 1	Collagen alpha-1(I) chain OS=Gallus gallus GN=COL1A1 PE=1 SV=3	P02457|CO1A1_CHICK	R.GAP(+15.99)GPP(+15.99)GAVGAAGKDGEAGAQGPPGPTGPAGER.G	Y	37.04	2839.35	33	1.5	947.458	3	13.7		F15:150	2	588	620	Oxidation or Hydroxylation	P3:Oxidation or Hydroxylation:14.04;P6:Oxidation or Hydroxylation:17.01
1	5-H/GuHCl-P	GuHCl	5 mL/g	Solubilization	Precipitation	1	2	4	Collagen I, alpha 1	Collagen alpha-1(I) chain OS=Gallus gallus GN=COL1A1 PE=1 SV=3	P02457|CO1A1_CHICK	R.GLTGPIGPPGPAGAPGDK(+42.01)GE(+21.98)AGPPGPAGPTGAR.G	Y	16.43	2894.43	33	-3.2	965.814	3	16.1		F15:230	1	753	785	Acetylation (K); Sodium adduct	K18:Acetylation (K):1000.00;E20:Sodium adduct:4.52
1	5-H/GuHCl-P	GuHCl	5 mL/g	Solubilization	Precipitation	1	2	4	Collagen I, alpha 1	Collagen alpha-1(I) chain OS=Gallus gallus GN=COL1A1 PE=1 SV=3	P02457|CO1A1_CHICK	K.Q(+42.01)GPSGASGERGPPGP(+15.99)MGPPGLAGPPGEAGR(+15.99).E	Y	19.73	2768.29	30	1.4	923.773	3	16.24		F15:234	1	974	1003	Acetylation (N-term); Oxidation or Hydroxylation	Q1:Acetylation (N-term):1000.00;P15:Oxidation or Hydroxylation:0.00;R30:Oxidation or Hydroxylation:0.00
1	5-H/GuHCl-P	GuHCl	5 mL/g	Solubilization	Precipitation	1	2	4	Collagen I, alpha 1	Collagen alpha-1(I) chain OS=Gallus gallus GN=COL1A1 PE=1 SV=3	P02457|CO1A1_CHICK	K.GSP(+15.99)GADGPIGAP(+15.99)GTP(+15.99)GPQGIAGQR.G	Y	29.19	2162.04	24	2.1	1082.03	2	16.27		F15:235	2	924	947	Oxidation or Hydroxylation	P3:Oxidation or Hydroxylation:0.00;P12:Oxidation or Hydroxylation:67.69;P15:Oxidation or Hydroxylation:15.73
1	5-H/GuHCl-P	GuHCl	5 mL/g	Solubilization	Precipitation	1	2	4	Collagen I, alpha 1	Collagen alpha-1(I) chain OS=Gallus gallus GN=COL1A1 PE=1 SV=3	P02457|CO1A1_CHICK	R.GLTGPIGPP(+15.99)GPAGAPGD(+15.99)KGEAGPP(+15.99)GPAGPTGAR.G	Y	43.73	2878.42	33	1.7	960.482	3	16.39		F15:239	6	753	785	Oxidation or Hydroxylation	P9:Oxidation or Hydroxylation:33.81;D17:Oxidation or Hydroxylation:49.54;P24:Oxidation or Hydroxylation:48.12
1	5-H/GuHCl-P	GuHCl	5 mL/g	Solubilization	Precipitation	1	2	4	Collagen I, alpha 1	Collagen alpha-1(I) chain OS=Gallus gallus GN=COL1A1 PE=1 SV=3	P02457|CO1A1_CHICK	R.GLTGPIGPPGP(+15.99)AGAPGDKGEAGPPGP(+15.99)AGPTGAR.G	Y	15.05	2862.43	33	-6.1	955.143	3	17.32		F15:271	1	753	785	Oxidation or Hydroxylation	P11:Oxidation or Hydroxylation:0.00;P26:Oxidation or Hydroxylation:0.00
1	5-H/GuHCl-P	GuHCl	5 mL/g	Solubilization	Precipitation	1	2	4	Collagen I, alpha 1	Collagen alpha-1(I) chain OS=Gallus gallus GN=COL1A1 PE=1 SV=3	P02457|CO1A1_CHICK	R.GFSGLQGP(+15.99)PGPP(+15.99)GAP(+15.99)GEQGPSGASGPAGPR.G	Y	34.38	2688.25	30	1.3	897.093	3	18.28	124000000	F15:304	1	1101	1130	Oxidation or Hydroxylation	P8:Oxidation or Hydroxylation:22.09;P12:Oxidation or Hydroxylation:17.73;P15:Oxidation or Hydroxylation:42.68
1	5-H/GuHCl-P	GuHCl	5 mL/g	Solubilization	Precipitation	1	2	4	Collagen I, alpha 1	Collagen alpha-1(I) chain OS=Gallus gallus GN=COL1A1 PE=1 SV=3	P02457|CO1A1_CHICK	R.GFSGLQGPP(+15.99)GPP(+15.99)GAP(+15.99)GEQGPSGASGPAGPR.G	Y	45.82	2688.25	30	1.1	1345.14	2	18.39	62300000	F15:308	6	1101	1130	Oxidation or Hydroxylation	P9:Oxidation or Hydroxylation:27.66;P12:Oxidation or Hydroxylation:79.67;P15:Oxidation or Hydroxylation:118.11
1	5-H/GuHCl-P	GuHCl	5 mL/g	Solubilization	Precipitation	1	2	4	Collagen I, alpha 1	Collagen alpha-1(I) chain OS=Gallus gallus GN=COL1A1 PE=1 SV=3	P02457|CO1A1_CHICK	R.GFSGLQGPPGP(+15.99)P(+15.99)GAP(+15.99)GEQGPSGASGPAGPR.G	Y	35.95	2688.25	30	1.8	897.093	3	18.45	124000000	F15:310	1	1101	1130	Oxidation or Hydroxylation	P11:Oxidation or Hydroxylation:9.42;P12:Oxidation or Hydroxylation:19.86;P15:Oxidation or Hydroxylation:30.64
1	5-H/GuHCl-P	GuHCl	5 mL/g	Solubilization	Precipitation	1	2	4	Collagen I, alpha 1	Collagen alpha-1(I) chain OS=Gallus gallus GN=COL1A1 PE=1 SV=3	P02457|CO1A1_CHICK	R.GQAGVMGFPGP(+15.99)K.G	Y	34.55	1160.56	12	0.7	581.29	2	18.56		F15:314	1	564	575	Oxidation or Hydroxylation	P11:Oxidation or Hydroxylation:0.00
1	5-H/GuHCl-P	GuHCl	5 mL/g	Solubilization	Precipitation	1	2	4	Collagen I, alpha 1	Collagen alpha-1(I) chain OS=Gallus gallus GN=COL1A1 PE=1 SV=3	P02457|CO1A1_CHICK	R.GLP(+15.99)GTAGLP(+15.99)GMK.G	Y	28.74	1129.58	12	1.1	565.798	2	18.64	4230000	F15:317	1	243	254	Oxidation or Hydroxylation	P3:Oxidation or Hydroxylation:85.33;P9:Oxidation or Hydroxylation:5.08
1	5-H/GuHCl-P	GuHCl	5 mL/g	Solubilization	Precipitation	1	2	4	Collagen I, alpha 1	Collagen alpha-1(I) chain OS=Gallus gallus GN=COL1A1 PE=1 SV=3	P02457|CO1A1_CHICK	R.GQAGVMGFPGPK(+15.99).G	Y	33.99	1160.56	12	0.8	581.29	2	18.75		F15:321	1	564	575	Oxidation or Hydroxylation	K12:Oxidation or Hydroxylation:0.00
1	5-H/GuHCl-P	GuHCl	5 mL/g	Solubilization	Precipitation	1	2	4	Collagen I, alpha 1	Collagen alpha-1(I) chain OS=Gallus gallus GN=COL1A1 PE=1 SV=3	P02457|CO1A1_CHICK	R.GFSGLQGP(+15.99)PGPPGAP(+15.99)GEQGPSGASGPAGPR.G	Y	23.63	2672.26	30	1.4	891.761	3	19.25		F15:338	2	1101	1130	Oxidation or Hydroxylation	P8:Oxidation or Hydroxylation:0.00;P15:Oxidation or Hydroxylation:28.36
1	5-H/GuHCl-P	GuHCl	5 mL/g	Solubilization	Precipitation	1	2	4	Collagen I, alpha 1	Collagen alpha-1(I) chain OS=Gallus gallus GN=COL1A1 PE=1 SV=3	P02457|CO1A1_CHICK	R.GFSGLQGPP(+15.99)GPPGAP(+15.99)GEQGPSGASGPAGPR.G	Y	45.38	2672.26	30	1.8	1337.14	2	19.28		F15:339	2	1101	1130	Oxidation or Hydroxylation	P9:Oxidation or Hydroxylation:38.64;P15:Oxidation or Hydroxylation:54.71
1	5-H/GuHCl-P	GuHCl	5 mL/g	Solubilization	Precipitation	1	2	4	Collagen I, alpha 1	Collagen alpha-1(I) chain OS=Gallus gallus GN=COL1A1 PE=1 SV=3	P02457|CO1A1_CHICK	K.DGLNGLP(+15.99)GPIGP(+15.99)PGPR(+15.99).G	Y	28.64	1560.79	16	0.8	781.403	2	19.77		F15:355	1	1142	1157	Oxidation or Hydroxylation	P7:Oxidation or Hydroxylation:26.31;P12:Oxidation or Hydroxylation:0.00;R16:Oxidation or Hydroxylation:0.00
1	5-H/GuHCl-P	GuHCl	5 mL/g	Solubilization	Precipitation	1	2	4	Collagen I, alpha 1	Collagen alpha-1(I) chain OS=Gallus gallus GN=COL1A1 PE=1 SV=3	P02457|CO1A1_CHICK	R.GLTGPIGPP(+15.99)GPAGAP(+15.99)GDKGEAGPP(+15.99)GPAGPTGAR.G	Y	45.32	2878.42	33	-0.5	960.48	3	36.65		F15:721	14	753	785	Oxidation or Hydroxylation	P9:Oxidation or Hydroxylation:49.79;P15:Oxidation or Hydroxylation:46.31;P24:Oxidation or Hydroxylation:90.97
1	5-H/GuHCl-P	GuHCl	5 mL/g	Solubilization	Precipitation	1	2	4	Collagen I, alpha 1	Collagen alpha-1(I) chain OS=Gallus gallus GN=COL1A1 PE=1 SV=3	P02457|CO1A1_CHICK	K.GATGAP(+15.99)GIAGAPGF(+15.99)P(+15.99)GAR.G	Y	21.54	1571.77	18	2.2	786.894	2	11.24		F15:80	1	387	404	Oxidation or Hydroxylation	P6:Oxidation or Hydroxylation:72.73;F14:Oxidation or Hydroxylation:7.32;P15:Oxidation or Hydroxylation:5.77
1	5-H/GuHCl-P	GuHCl	5 mL/g	Solubilization	Precipitation	2	2	4	Collagen I, alpha 1	Collagen alpha-1(I) chain OS=Gallus gallus GN=COL1A1 PE=1 SV=3	P02457|CO1A1_CHICK	R.GFP(+15.99)GADGIAGPKGPP(+15.99)GER.G	Y	25.64	1710.83	18	1.3	856.425	2	15.82		F16:211	1	483	500	Oxidation or Hydroxylation	P3:Oxidation or Hydroxylation:12.28;P15:Oxidation or Hydroxylation:0.00
1	5-H/GuHCl-P	GuHCl	5 mL/g	Solubilization	Precipitation	2	2	4	Collagen I, alpha 1	Collagen alpha-1(I) chain OS=Gallus gallus GN=COL1A1 PE=1 SV=3	P02457|CO1A1_CHICK	K.Q(+42.01)GPSGASGERGP(+15.99)PGPMGPPGLAGPPGEAGR(+15.99).E	Y	19.47	2768.29	30	0.7	923.772	3	16.34		F16:228	1	974	1003	Acetylation (N-term); Oxidation or Hydroxylation	Q1:Acetylation (N-term):1000.00;P12:Oxidation or Hydroxylation:0.00;R30:Oxidation or Hydroxylation:0.00
1	5-H/GuHCl-P	GuHCl	5 mL/g	Solubilization	Precipitation	2	2	4	Collagen I, alpha 1	Collagen alpha-1(I) chain OS=Gallus gallus GN=COL1A1 PE=1 SV=3	P02457|CO1A1_CHICK	R.GQAGVMGFP(+15.99)GPK.G	Y	36.3	1160.56	12	0.7	581.29	2	18.88		F16:313	2	564	575	Oxidation or Hydroxylation	P9:Oxidation or Hydroxylation:4.64
1	5-H/GuHCl-P	GuHCl	5 mL/g	Solubilization	Precipitation	2	2	4	Collagen I, alpha 1	Collagen alpha-1(I) chain OS=Gallus gallus GN=COL1A1 PE=1 SV=3	P02457|CO1A1_CHICK	K.DGLNGLP(+15.99)GPIGPPGP(+15.99)R(+15.99).G	Y	23.52	1560.79	16	0.8	781.403	2	19.96		F16:348	1	1142	1157	Oxidation or Hydroxylation	P7:Oxidation or Hydroxylation:40.00;P15:Oxidation or Hydroxylation:3.29;R16:Oxidation or Hydroxylation:2.44
1	5-H/GuHCl-P	GuHCl	5 mL/g	Solubilization	Precipitation	2	2	4	Collagen I, alpha 1	Collagen alpha-1(I) chain OS=Gallus gallus GN=COL1A1 PE=1 SV=3	P02457|CO1A1_CHICK	K.ALLLQGANEIEIR.A	Y	37.04	1438.81	13	1	720.415	2	26.42		F16:521	1	1376	1388
1	5-H/GuHCl-P	GuHCl	5 mL/g	Solubilization	Precipitation	1	1	1	Collagen I, alpha 2	Collagen alpha-2(I) chain OS=Gallus gallus GN=COL1A2 PE=4 SV=1	tr|F1P0H9|F1P0H9_CHICK	D.GNKGEPGN(+15.99)VGPAGAP(+15.99)GPAGPGGIPGER(+15.99).G	Y	20.75	2414.16	27	1.1	805.727	3	13.99		F15:160	2	618	644	Oxidation or Hydroxylation	N8:Oxidation or Hydroxylation:0.00;P15:Oxidation or Hydroxylation:11.10;R27:Oxidation or Hydroxylation:0.00
1	5-H/GuHCl-P	GuHCl	5 mL/g	Solubilization	Precipitation	1	1	1	Collagen I, alpha 2	Collagen alpha-2(I) chain OS=Gallus gallus GN=COL1A2 PE=4 SV=1	tr|F1P0H9|F1P0H9_CHICK	R.GASGPVGAKGPN(+.98)GDAGRPGEP(+15.99)GLM(+15.99)GPR.G	Y	27.59	2491.19	27	1	623.805	4	14.19		F15:166	1	423	449	Deamidation (NQ); Oxidation or Hydroxylation; Oxidation (M)	N12:Deamidation (NQ):1000.00;P21:Oxidation or Hydroxylation:0.00;M24:Oxidation (M):1000.00
1	5-H/GuHCl-P	GuHCl	5 mL/g	Solubilization	Precipitation	1	1	1	Collagen I, alpha 2	Collagen alpha-2(I) chain OS=Gallus gallus GN=COL1A2 PE=4 SV=1	tr|F1P0H9|F1P0H9_CHICK	R.GLHGEFGVPGPAGPRGER(+15.99).G	Y	36.61	1804.9	18	0	602.64	3	14.63		F15:181	1	573	590	Oxidation or Hydroxylation	R18:Oxidation or Hydroxylation:0.00
1	5-H/GuHCl-P	GuHCl	5 mL/g	Solubilization	Precipitation	1	1	1	Collagen I, alpha 2	Collagen alpha-2(I) chain OS=Gallus gallus GN=COL1A2 PE=4 SV=1	tr|F1P0H9|F1P0H9_CHICK	R.GLP(+15.99)GAIGAP(+15.99)GPAGGAGDRGEGGPAGPAGPAGAR.G	Y	29.37	2724.33	33	1	909.119	3	15.56		F15:211	7	675	707	Oxidation or Hydroxylation	P3:Oxidation or Hydroxylation:113.22;P9:Oxidation or Hydroxylation:9.40
1	5-H/GuHCl-P	GuHCl	5 mL/g	Solubilization	Precipitation	1	1	1	Collagen I, alpha 2	Collagen alpha-2(I) chain OS=Gallus gallus GN=COL1A2 PE=4 SV=1	tr|F1P0H9|F1P0H9_CHICK	R.VGP(+15.99)P(+15.99)GPAGITGPP(+15.99)GPP(+15.99)GPAGK.D	Y	19.1	1840.93	21	1.2	921.474	2	15.59		F15:212	1	794	814	Oxidation or Hydroxylation	P3:Oxidation or Hydroxylation:28.36;P4:Oxidation or Hydroxylation:7.32;P13:Oxidation or Hydroxylation:10.11;P16:Oxidation or Hydroxylation:10.11
1	5-H/GuHCl-P	GuHCl	5 mL/g	Solubilization	Precipitation	1	1	1	Collagen I, alpha 2	Collagen alpha-2(I) chain OS=Gallus gallus GN=COL1A2 PE=4 SV=1	tr|F1P0H9|F1P0H9_CHICK	R.GPP(+15.99)GPSGPPGKDGRN(+.98)GLP(+15.99)GPIGPAGVR.G	Y	34.88	2493.27	27	0.6	624.326	4	15.84		F15:221	3	1053	1079	Oxidation or Hydroxylation; Deamidation (NQ)	P3:Oxidation or Hydroxylation:12.28;N15:Deamidation (NQ):1000.00;P18:Oxidation or Hydroxylation:14.04
1	5-H/GuHCl-P	GuHCl	5 mL/g	Solubilization	Precipitation	1	1	1	Collagen I, alpha 2	Collagen alpha-2(I) chain OS=Gallus gallus GN=COL1A2 PE=4 SV=1	tr|F1P0H9|F1P0H9_CHICK	R.GPPGPSGPPGKD(+15.99)GRN(+.98)GLPGPIGPAGVR.G	Y	17.55	2477.28	27	0.3	620.327	4	16.16		F15:232	1	1053	1079	Oxidation or Hydroxylation; Deamidation (NQ)	D12:Oxidation or Hydroxylation:0.00;N15:Deamidation (NQ):1000.00
1	5-H/GuHCl-P	GuHCl	5 mL/g	Solubilization	Precipitation	1	1	1	Collagen I, alpha 2	Collagen alpha-2(I) chain OS=Gallus gallus GN=COL1A2 PE=4 SV=1	tr|F1P0H9|F1P0H9_CHICK	R.GLHGEFGVP(+15.99)GPAGPR.G	Y	38.54	1462.73	15	1.2	732.374	2	16.36		F15:238	4	573	587	Oxidation or Hydroxylation	P9:Oxidation or Hydroxylation:20.41
1	5-H/GuHCl-P	GuHCl	5 mL/g	Solubilization	Precipitation	1	1	1	Collagen I, alpha 2	Collagen alpha-2(I) chain OS=Gallus gallus GN=COL1A2 PE=4 SV=1	tr|F1P0H9|F1P0H9_CHICK	R.GLP(+15.99)GESGAVGPAGPIGSR.G	Y	35.98	1593.81	18	1.4	797.914	2	17.43		F15:274	2	591	608	Oxidation or Hydroxylation	P3:Oxidation or Hydroxylation:112.87
1	5-H/GuHCl-P	GuHCl	5 mL/g	Solubilization	Precipitation	1	1	1	Collagen I, alpha 2	Collagen alpha-2(I) chain OS=Gallus gallus GN=COL1A2 PE=4 SV=1	tr|F1P0H9|F1P0H9_CHICK	R.GLP(+15.99)GESGAVGP(+31.99)AGPIGSR.G	Y	28.33	1625.8	18	0.4	813.908	2	17.53		F15:278	2	591	608	Oxidation or Hydroxylation; Dihydroxy	P3:Oxidation or Hydroxylation:59.08;P11:Dihydroxy:22.69
1	5-H/GuHCl-P	GuHCl	5 mL/g	Solubilization	Precipitation	1	1	1	Collagen I, alpha 2	Collagen alpha-2(I) chain OS=Gallus gallus GN=COL1A2 PE=4 SV=1	tr|F1P0H9|F1P0H9_CHICK	R.VGPIGPAGNRGEP(+15.99)GNIGFP(+15.99)GPK.G	Y	35.81	2119.08	22	1.2	1060.55	2	18.23	54000000	F15:302	4	476	497	Oxidation or Hydroxylation	P13:Oxidation or Hydroxylation:0.00;P19:Oxidation or Hydroxylation:0.00
1	5-H/GuHCl-P	GuHCl	5 mL/g	Solubilization	Precipitation	1	1	1	Collagen I, alpha 2	Collagen alpha-2(I) chain OS=Gallus gallus GN=COL1A2 PE=4 SV=1	tr|F1P0H9|F1P0H9_CHICK	K.GAAGLP(+15.99)GVAGAP(+15.99)GLPGP(+15.99)R.G	Y	37.07	1561.82	18	1.6	781.919	2	18.61		F15:316	4	309	326	Oxidation or Hydroxylation	P6:Oxidation or Hydroxylation:161.52;P12:Oxidation or Hydroxylation:29.32;P17:Oxidation or Hydroxylation:0.00
1	5-H/GuHCl-P	GuHCl	5 mL/g	Solubilization	Precipitation	1	1	1	Collagen I, alpha 2	Collagen alpha-2(I) chain OS=Gallus gallus GN=COL1A2 PE=4 SV=1	tr|F1P0H9|F1P0H9_CHICK	K.GAAGLP(+15.99)GVAGAP(+15.99)GLP(+15.99)GPR.G	Y	34.14	1561.82	18	1.2	781.919	2	18.7		F15:319	1	309	326	Oxidation or Hydroxylation	P6:Oxidation or Hydroxylation:112.13;P12:Oxidation or Hydroxylation:32.32;P15:Oxidation or Hydroxylation:5.47
1	5-H/GuHCl-P	GuHCl	5 mL/g	Solubilization	Precipitation	1	1	1	Collagen I, alpha 2	Collagen alpha-2(I) chain OS=Gallus gallus GN=COL1A2 PE=4 SV=1	tr|F1P0H9|F1P0H9_CHICK	K.GP(+15.99)KGETGPTGAIGPIGASGPP(+15.99)GPVGAAGPAGPR.G	Y	46.37	2836.45	33	1.1	946.49	3	18.73		F15:320	3	744	776	Oxidation or Hydroxylation	P2:Oxidation or Hydroxylation:0.00;P21:Oxidation or Hydroxylation:72.07
1	5-H/GuHCl-P	GuHCl	5 mL/g	Solubilization	Precipitation	1	1	1	Collagen I, alpha 2	Collagen alpha-2(I) chain OS=Gallus gallus GN=COL1A2 PE=4 SV=1	tr|F1P0H9|F1P0H9_CHICK	R.GEIGLP(+15.99)GSSGPVGPP(+15.99)GNP(+15.99)GAN(+.98)GLP(+15.99)GAK.G	Y	16.75	2418.17	27	1.3	1210.09	2	19.55		F15:348	1	282	308	Oxidation or Hydroxylation; Deamidation (NQ)	P6:Oxidation or Hydroxylation:23.70;P15:Oxidation or Hydroxylation:8.69;P18:Oxidation or Hydroxylation:40.00;N21:Deamidation (NQ):42.68;P24:Oxidation or Hydroxylation:0.00
1	5-H/GuHCl-P	GuHCl	5 mL/g	Solubilization	Precipitation	1	1	1	Collagen I, alpha 2	Collagen alpha-2(I) chain OS=Gallus gallus GN=COL1A2 PE=4 SV=1	tr|F1P0H9|F1P0H9_CHICK	R.GSDGSAGPTGPAGPIGAAGPP(+15.99)GF(+15.99)PGAP(+15.99)GAK.G	Y	45.78	2520.19	30	2.1	1261.1	2	20.17		F15:369	1	234	263	Oxidation or Hydroxylation	P21:Oxidation or Hydroxylation:102.29;F23:Oxidation or Hydroxylation:112.27;P27:Oxidation or Hydroxylation:115.60
1	5-H/GuHCl-P	GuHCl	5 mL/g	Solubilization	Precipitation	1	1	1	Collagen I, alpha 2	Collagen alpha-2(I) chain OS=Gallus gallus GN=COL1A2 PE=4 SV=1	tr|F1P0H9|F1P0H9_CHICK	R.GSDGSAGPTGPAGPIGAAGPP(+15.99)GFP(+15.99)GAP(+15.99)GAK.G	Y	45.48	2520.19	30	1.4	1261.1	2	20.41		F15:377	3	234	263	Oxidation or Hydroxylation	P21:Oxidation or Hydroxylation:110.43;P24:Oxidation or Hydroxylation:150.82;P27:Oxidation or Hydroxylation:134.51
1	5-H/GuHCl-P	GuHCl	5 mL/g	Solubilization	Precipitation	1	1	1	Collagen I, alpha 2	Collagen alpha-2(I) chain OS=Gallus gallus GN=COL1A2 PE=4 SV=1	tr|F1P0H9|F1P0H9_CHICK	R.N(+.98)GLP(+15.99)GPIGPAGVR.G	Y	34.66	1220.65	13	1	611.333	2	20.62		F15:384	4	1067	1079	Deamidation (NQ); Oxidation or Hydroxylation	N1:Deamidation (NQ):1000.00;P4:Oxidation or Hydroxylation:60.92
1	5-H/GuHCl-P	GuHCl	5 mL/g	Solubilization	Precipitation	1	1	1	Collagen I, alpha 2	Collagen alpha-2(I) chain OS=Gallus gallus GN=COL1A2 PE=4 SV=1	tr|F1P0H9|F1P0H9_CHICK	K.GETGPTGAIGPIGASGPP(+15.99)GPVGAAGPAGPR.G	Y	42.01	2538.28	30	1.7	1270.15	2	21.16		F15:401	2	747	776	Oxidation or Hydroxylation	P18:Oxidation or Hydroxylation:64.84
1	5-H/GuHCl-P	GuHCl	5 mL/g	Solubilization	Precipitation	1	1	1	Collagen I, alpha 2	Collagen alpha-2(I) chain OS=Gallus gallus GN=COL1A2 PE=4 SV=1	tr|F1P0H9|F1P0H9_CHICK	D.P(+15.99)GPVGPVGPAGAFGPR.G	Y	42.64	1447.76	16	0.7	724.886	2	21.19		F15:402	3	980	995	Oxidation or Hydroxylation	P1:Oxidation or Hydroxylation:14.63
1	5-H/GuHCl-P	GuHCl	5 mL/g	Solubilization	Precipitation	1	1	1	Collagen I, alpha 2	Collagen alpha-2(I) chain OS=Gallus gallus GN=COL1A2 PE=4 SV=1	tr|F1P0H9|F1P0H9_CHICK	R.GDP(+15.99)GPVGPVGPAGAFGPR.G	Y	45.48	1619.81	18	0.7	810.911	2	21.4		F15:409	4	978	995	Oxidation or Hydroxylation	P3:Oxidation or Hydroxylation:17.01
1	5-H/GuHCl-P	GuHCl	5 mL/g	Solubilization	Precipitation	1	1	1	Collagen I, alpha 2	Collagen alpha-2(I) chain OS=Gallus gallus GN=COL1A2 PE=4 SV=1	tr|F1P0H9|F1P0H9_CHICK	D.PGPVGPVGPAGAFGPR.G	Y	34.15	1431.76	16	1.1	716.889	2	21.66		F15:418	4	980	995
1	5-H/GuHCl-P	GuHCl	5 mL/g	Solubilization	Precipitation	1	1	1	Collagen I, alpha 2	Collagen alpha-2(I) chain OS=Gallus gallus GN=COL1A2 PE=4 SV=1	tr|F1P0H9|F1P0H9_CHICK	R.GFP(+15.99)GTP(+15.99)GLPGFK(+15.99).G	Y	26.3	1221.6	12	0.8	611.809	2	21.74		F15:421	2	165	176	Oxidation or Hydroxylation	P3:Oxidation or Hydroxylation:14.02;P6:Oxidation or Hydroxylation:38.16;K12:Oxidation or Hydroxylation:0.00
1	5-H/GuHCl-P	GuHCl	5 mL/g	Solubilization	Precipitation	1	1	1	Collagen I, alpha 2	Collagen alpha-2(I) chain OS=Gallus gallus GN=COL1A2 PE=4 SV=1	tr|F1P0H9|F1P0H9_CHICK	R.GFP(+15.99)GTP(+15.99)GLPGF(+15.99)K.G	Y	28.63	1221.6	12	0.6	611.809	2	21.92		F15:427	1	165	176	Oxidation or Hydroxylation	P3:Oxidation or Hydroxylation:8.69;P6:Oxidation or Hydroxylation:38.16;F11:Oxidation or Hydroxylation:0.00
1	5-H/GuHCl-P	GuHCl	5 mL/g	Solubilization	Precipitation	1	1	1	Collagen I, alpha 2	Collagen alpha-2(I) chain OS=Gallus gallus GN=COL1A2 PE=4 SV=1	tr|F1P0H9|F1P0H9_CHICK	R.GLP(+15.99)GIAGATGEP(+15.99)GPLGVSGPPGAR(+15.99).G	Y	40.2	2132.09	24	1.3	1067.05	2	22.25		F15:437	19	882	905	Oxidation or Hydroxylation	P3:Oxidation or Hydroxylation:195.68;P12:Oxidation or Hydroxylation:36.05;R24:Oxidation or Hydroxylation:0.00
1	5-H/GuHCl-P	GuHCl	5 mL/g	Solubilization	Precipitation	1	1	1	Collagen I, alpha 2	Collagen alpha-2(I) chain OS=Gallus gallus GN=COL1A2 PE=4 SV=1	tr|F1P0H9|F1P0H9_CHICK	K.GETGPTGAIGPIGASGP(+15.99)PGPVGAAGPAGPRGD(+15.99)AGPPGMTGFPGAAGR(+15.99).V	Y	28.2	4066.96	47	1	1017.75	4	22.94		F15:455	1	747	793	Oxidation or Hydroxylation	P17:Oxidation or Hydroxylation:0.00;D32:Oxidation or Hydroxylation:0.00;R47:Oxidation or Hydroxylation:0.00
1	5-H/GuHCl-P	GuHCl	5 mL/g	Solubilization	Precipitation	1	1	1	Collagen I, alpha 2	Collagen alpha-2(I) chain OS=Gallus gallus GN=COL1A2 PE=4 SV=1	tr|F1P0H9|F1P0H9_CHICK	K.GETGPTGAIGPIGASGP(+15.99)PGPVGAAGPAGPRGDAGPP(+15.99)GMTGFP(+15.99)GAAGR.V	Y	45.1	4066.96	47	2.1	1356.66	3	22.96		F15:456	1	747	793	Oxidation or Hydroxylation	P17:Oxidation or Hydroxylation:83.60;P36:Oxidation or Hydroxylation:65.10;P42:Oxidation or Hydroxylation:54.97
1	5-H/GuHCl-P	GuHCl	5 mL/g	Solubilization	Precipitation	1	1	1	Collagen I, alpha 2	Collagen alpha-2(I) chain OS=Gallus gallus GN=COL1A2 PE=4 SV=1	tr|F1P0H9|F1P0H9_CHICK	R.GLP(+15.99)GIAGATGEPGPLGVSGPPGAR(+15.99).G	Y	36.66	2116.09	24	1.1	1059.05	2	23.29		F15:464	2	882	905	Oxidation or Hydroxylation	P3:Oxidation or Hydroxylation:159.26;R24:Oxidation or Hydroxylation:0.00
1	5-H/GuHCl-P	GuHCl	5 mL/g	Solubilization	Precipitation	1	1	1	Collagen I, alpha 2	Collagen alpha-2(I) chain OS=Gallus gallus GN=COL1A2 PE=4 SV=1	tr|F1P0H9|F1P0H9_CHICK	D.PSK(+15.99)AADFGPGPMGLMGPR.G	Y	39.86	1800.87	18	1.1	601.296	3	23.32		F15:465	1	81	98	Oxidation or Hydroxylation	K3:Oxidation or Hydroxylation:9.40
1	5-H/GuHCl-P	GuHCl	5 mL/g	Solubilization	Precipitation	1	1	1	Collagen I, alpha 2	Collagen alpha-2(I) chain OS=Gallus gallus GN=COL1A2 PE=4 SV=1	tr|F1P0H9|F1P0H9_CHICK	R.GLP(+15.99)GIAGATGEPGPLGVSGPP(+15.99)GAR.G	Y	38.27	2116.09	24	0.7	706.371	3	23.42		F15:468	1	882	905	Oxidation or Hydroxylation	P3:Oxidation or Hydroxylation:126.05;P21:Oxidation or Hydroxylation:0.00
1	5-H/GuHCl-P	GuHCl	5 mL/g	Solubilization	Precipitation	1	1	1	Collagen I, alpha 2	Collagen alpha-2(I) chain OS=Gallus gallus GN=COL1A2 PE=4 SV=1	tr|F1P0H9|F1P0H9_CHICK	R.GLP(+15.99)GIAGATGEPGPLGVSGP(+15.99)PGAR.G	Y	35.69	2116.09	24	1.8	1059.05	2	23.56		F15:472	3	882	905	Oxidation or Hydroxylation	P3:Oxidation or Hydroxylation:106.84;P20:Oxidation or Hydroxylation:0.00
1	5-H/GuHCl-P	GuHCl	5 mL/g	Solubilization	Precipitation	1	1	1	Collagen I, alpha 2	Collagen alpha-2(I) chain OS=Gallus gallus GN=COL1A2 PE=4 SV=1	tr|F1P0H9|F1P0H9_CHICK	D.FGPGPMGLMGPR.G	Y	36.89	1215.59	12	0.6	608.802	2	25.58		F15:526	3	87	98
1	5-H/GuHCl-P	GuHCl	5 mL/g	Solubilization	Precipitation	1	1	1	Collagen I, alpha 2	Collagen alpha-2(I) chain OS=Gallus gallus GN=COL1A2 PE=4 SV=1	tr|F1P0H9|F1P0H9_CHICK	K.AADFGP(+15.99)GPMGLMGPR.G	Y	34.91	1488.69	15	1.2	745.351	2	25.65		F15:528	1	84	98	Oxidation or Hydroxylation	P6:Oxidation or Hydroxylation:45.01
1	5-H/GuHCl-P	GuHCl	5 mL/g	Solubilization	Precipitation	1	1	1	Collagen I, alpha 2	Collagen alpha-2(I) chain OS=Gallus gallus GN=COL1A2 PE=4 SV=1	tr|F1P0H9|F1P0H9_CHICK	D.FGPGPM(+15.99)GLM(+15.99)GPR.G	Y	32.67	1247.58	12	0.4	624.797	2	25.86		F15:532	3	87	98	Oxidation (M)	M6:Oxidation (M):1000.00;M9:Oxidation (M):1000.00
1	5-H/GuHCl-P	GuHCl	5 mL/g	Solubilization	Precipitation	1	1	1	Collagen I, alpha 2	Collagen alpha-2(I) chain OS=Gallus gallus GN=COL1A2 PE=4 SV=1	tr|F1P0H9|F1P0H9_CHICK	K.AADFGPGPM(+15.99)GLM(+15.99)GPR.G	Y	42.7	1504.68	15	1.6	753.349	2	26.55		F15:549	2	84	98	Oxidation (M)	M9:Oxidation (M):1000.00;M12:Oxidation (M):1000.00
1	5-H/GuHCl-P	GuHCl	5 mL/g	Solubilization	Precipitation	1	1	1	Collagen I, alpha 2	Collagen alpha-2(I) chain OS=Gallus gallus GN=COL1A2 PE=4 SV=1	tr|F1P0H9|F1P0H9_CHICK	K.AADFGPGPMGLMGPR.G	Y	46.7	1472.69	15	1.4	737.354	2	26.7		F15:553	4	84	98
1	5-H/GuHCl-P	GuHCl	5 mL/g	Solubilization	Precipitation	1	1	1	Collagen I, alpha 2	Collagen alpha-2(I) chain OS=Gallus gallus GN=COL1A2 PE=4 SV=1	tr|F1P0H9|F1P0H9_CHICK	A.Q(-17.03)YDPSK(+15.99)AADFGPGPMGLMGPR.G	Y	32.62	2189.99	21	0.9	1096	2	28.63		F15:600	2	78	98	Pyro-glu from Q; Oxidation or Hydroxylation	Q1:Pyro-glu from Q:1000.00;K6:Oxidation or Hydroxylation:26.31
1	5-H/GuHCl-P	GuHCl	5 mL/g	Solubilization	Precipitation	1	1	1	Collagen I, alpha 2	Collagen alpha-2(I) chain OS=Gallus gallus GN=COL1A2 PE=4 SV=1	tr|F1P0H9|F1P0H9_CHICK	R.VGPIGPAGNRGEP(+15.99)GNIGFPGPK(+15.99).G	Y	29.09	2119.08	22	0.2	707.368	3	35.59		F15:712	3	476	497	Oxidation or Hydroxylation	P13:Oxidation or Hydroxylation:0.00;K22:Oxidation or Hydroxylation:0.00
1	5-H/GuHCl-P	GuHCl	5 mL/g	Solubilization	Precipitation	1	1	1	Collagen I, alpha 2	Collagen alpha-2(I) chain OS=Gallus gallus GN=COL1A2 PE=4 SV=1	tr|F1P0H9|F1P0H9_CHICK	R.GLP(+15.99)GIAGATGEPGP(+15.99)LGVSGPPGAR(+15.99).G	Y	15.58	2132.09	24	1.4	711.704	3	40.06		F15:748	1	882	905	Oxidation or Hydroxylation	P3:Oxidation or Hydroxylation:61.14;P14:Oxidation or Hydroxylation:0.00;R24:Oxidation or Hydroxylation:6.65
1	5-H/GuHCl-P	GuHCl	5 mL/g	Solubilization	Precipitation	2	1	1	Collagen I, alpha 2	Collagen alpha-2(I) chain OS=Gallus gallus GN=COL1A2 PE=4 SV=1	tr|F1P0H9|F1P0H9_CHICK	R.GASGPVGAKGPN(+.98)GDAGR(+15.99)PGEPGLM(+15.99)GPR.G	Y	33.71	2491.19	27	1	623.805	4	14.24		F16:159	1	423	449	Deamidation (NQ); Oxidation or Hydroxylation; Oxidation (M)	N12:Deamidation (NQ):1000.00;R17:Oxidation or Hydroxylation:0.00;M24:Oxidation (M):1000.00
1	5-H/GuHCl-P	GuHCl	5 mL/g	Solubilization	Precipitation	2	1	1	Collagen I, alpha 2	Collagen alpha-2(I) chain OS=Gallus gallus GN=COL1A2 PE=4 SV=1	tr|F1P0H9|F1P0H9_CHICK	R.VGP(+15.99)P(+15.99)GPAGITGP(+15.99)PGP(+15.99)PGPAGKDGPR.G	Y	15.96	2266.13	25	1.1	756.386	3	14.67		F16:173	1	794	818	Oxidation or Hydroxylation	P3:Oxidation or Hydroxylation:38.16;P4:Oxidation or Hydroxylation:26.31;P12:Oxidation or Hydroxylation:0.00;P15:Oxidation or Hydroxylation:0.00
1	5-H/GuHCl-P	GuHCl	5 mL/g	Solubilization	Precipitation	2	1	1	Collagen I, alpha 2	Collagen alpha-2(I) chain OS=Gallus gallus GN=COL1A2 PE=4 SV=1	tr|F1P0H9|F1P0H9_CHICK	R.GPSGPPGPDGNKGEPGNM(sub V)GPAGAP(+15.99)GPAGPGGIP(+15.99)GER.G	Y	15.58	3191.47	36	6.8	1064.84	3	14.79		F16:177	1	609	644	Oxidation or Hydroxylation; Mutation	P24:Oxidation or Hydroxylation:10.88;P33:Oxidation or Hydroxylation:0.00
1	5-H/GuHCl-P	GuHCl	5 mL/g	Solubilization	Precipitation	2	1	1	Collagen I, alpha 2	Collagen alpha-2(I) chain OS=Gallus gallus GN=COL1A2 PE=4 SV=1	tr|F1P0H9|F1P0H9_CHICK	R.GLHGEFGVP(+15.99)GPAGPRGER.G	Y	29.36	1804.9	18	0.4	602.64	3	14.84		F16:179	1	573	590	Oxidation or Hydroxylation	P9:Oxidation or Hydroxylation:0.00
1	5-H/GuHCl-P	GuHCl	5 mL/g	Solubilization	Precipitation	2	1	1	Collagen I, alpha 2	Collagen alpha-2(I) chain OS=Gallus gallus GN=COL1A2 PE=4 SV=1	tr|F1P0H9|F1P0H9_CHICK	R.GPP(+15.99)GPSGPPGKDGRN(+.98)GLPGP(+15.99)IGPAGVR.G	Y	17.65	2493.27	27	0.6	624.326	4	15.76		F16:209	1	1053	1079	Oxidation or Hydroxylation; Deamidation (NQ)	P3:Oxidation or Hydroxylation:17.01;N15:Deamidation (NQ):1000.00;P20:Oxidation or Hydroxylation:5.47
1	5-H/GuHCl-P	GuHCl	5 mL/g	Solubilization	Precipitation	2	1	1	Collagen I, alpha 2	Collagen alpha-2(I) chain OS=Gallus gallus GN=COL1A2 PE=4 SV=1	tr|F1P0H9|F1P0H9_CHICK	K.GETGPAGPP(+15.99)GFQGLP(+15.99)GPSGPAGEAGKP(+15.99)GER.G	Y	42.92	2776.31	30	1.2	926.443	3	17.83		F16:278	4	543	572	Oxidation or Hydroxylation	P9:Oxidation or Hydroxylation:69.71;P15:Oxidation or Hydroxylation:45.16;P27:Oxidation or Hydroxylation:23.64
1	5-H/GuHCl-P	GuHCl	5 mL/g	Solubilization	Precipitation	2	1	1	Collagen I, alpha 2	Collagen alpha-2(I) chain OS=Gallus gallus GN=COL1A2 PE=4 SV=1	tr|F1P0H9|F1P0H9_CHICK	R.VGPIGPAGNRGEP(+15.99)GNIGFPGP(+15.99)K.G	Y	32.47	2119.08	22	0.7	1060.55	2	18.34		F16:295	1	476	497	Oxidation or Hydroxylation	P13:Oxidation or Hydroxylation:26.31;P21:Oxidation or Hydroxylation:0.00
1	5-H/GuHCl-P	GuHCl	5 mL/g	Solubilization	Precipitation	2	1	1	Collagen I, alpha 2	Collagen alpha-2(I) chain OS=Gallus gallus GN=COL1A2 PE=4 SV=1	tr|F1P0H9|F1P0H9_CHICK	K.GP(+15.99)KGETGPTGAIGPIGASGP(+15.99)P(+15.99)GPVGAAGPAGPR.G	Y	29.69	2852.44	33	0.8	951.822	3	18.5		F16:301	1	744	776	Oxidation or Hydroxylation	P2:Oxidation or Hydroxylation:14.02;P20:Oxidation or Hydroxylation:69.58;P21:Oxidation or Hydroxylation:71.72
1	5-H/GuHCl-P	GuHCl	5 mL/g	Solubilization	Precipitation	2	1	1	Collagen I, alpha 2	Collagen alpha-2(I) chain OS=Gallus gallus GN=COL1A2 PE=4 SV=1	tr|F1P0H9|F1P0H9_CHICK	R.VGPIGPAGNRGEPGN(+15.99)IGFPGPK(+15.99).G	Y	21.4	2119.08	22	1.1	1060.55	2	18.78		F16:310	1	476	497	Oxidation or Hydroxylation	N15:Oxidation or Hydroxylation:5.47;K22:Oxidation or Hydroxylation:0.00
1	5-H/GuHCl-P	GuHCl	5 mL/g	Solubilization	Precipitation	2	1	1	Collagen I, alpha 2	Collagen alpha-2(I) chain OS=Gallus gallus GN=COL1A2 PE=4 SV=1	tr|F1P0H9|F1P0H9_CHICK	K.GPKGETGPTGAIGPIGASGPP(+15.99)GPVGAAGPAGPR.G	Y	43.22	2820.45	33	1.4	941.159	3	19.46		F16:332	4	744	776	Oxidation or Hydroxylation	P21:Oxidation or Hydroxylation:39.40
1	5-H/GuHCl-P	GuHCl	5 mL/g	Solubilization	Precipitation	2	1	1	Collagen I, alpha 2	Collagen alpha-2(I) chain OS=Gallus gallus GN=COL1A2 PE=4 SV=1	tr|F1P0H9|F1P0H9_CHICK	K.GETGPTGAIGPIGASGP(+15.99)PGPVGAAGPAGPR.G	Y	25.95	2538.28	30	1.1	847.102	3	21.11		F16:384	1	747	776	Oxidation or Hydroxylation	P17:Oxidation or Hydroxylation:0.00
1	5-H/GuHCl-P	GuHCl	5 mL/g	Solubilization	Precipitation	2	1	1	Collagen I, alpha 2	Collagen alpha-2(I) chain OS=Gallus gallus GN=COL1A2 PE=4 SV=1	tr|F1P0H9|F1P0H9_CHICK	K.GPKGETGPTGAIGPIGASGPP(+15.99)GPVGAAGPAGPRGDAGPP(+15.99)GMTGFPGAAGR(+15.99).V	Y	46.63	4349.12	50	1.5	1088.29	4	21.52		F16:398	1	744	793	Oxidation or Hydroxylation	P21:Oxidation or Hydroxylation:142.60;P39:Oxidation or Hydroxylation:130.32;R50:Oxidation or Hydroxylation:118.78
1	5-H/GuHCl-P	GuHCl	5 mL/g	Solubilization	Precipitation	2	1	1	Collagen I, alpha 2	Collagen alpha-2(I) chain OS=Gallus gallus GN=COL1A2 PE=4 SV=1	tr|F1P0H9|F1P0H9_CHICK	R.GFP(+15.99)GTP(+15.99)GLP(+15.99)GFK.G	Y	26.39	1221.6	12	0.7	611.809	2	21.96		F16:412	1	165	176	Oxidation or Hydroxylation	P3:Oxidation or Hydroxylation:17.01;P6:Oxidation or Hydroxylation:26.93;P9:Oxidation or Hydroxylation:0.00
1	5-H/GuHCl-P	GuHCl	5 mL/g	Solubilization	Precipitation	2	1	1	Collagen I, alpha 2	Collagen alpha-2(I) chain OS=Gallus gallus GN=COL1A2 PE=4 SV=1	tr|F1P0H9|F1P0H9_CHICK	D.PGPVGP(+15.99)VGPAGAFGPR.G	Y	14.35	1447.76	16	0.8	724.886	2	22.07		F16:416	1	980	995	Oxidation or Hydroxylation	P6:Oxidation or Hydroxylation:0.00
1	5-H/GuHCl-P	GuHCl	5 mL/g	Solubilization	Precipitation	2	1	1	Collagen I, alpha 2	Collagen alpha-2(I) chain OS=Gallus gallus GN=COL1A2 PE=4 SV=1	tr|F1P0H9|F1P0H9_CHICK	R.GDPGPVGPVGPAGAFGPR.G	Y	44.86	1603.81	18	1.4	802.914	2	22.19		F16:420	4	978	995
1	5-H/GuHCl-P	GuHCl	5 mL/g	Solubilization	Precipitation	2	1	1	Collagen I, alpha 2	Collagen alpha-2(I) chain OS=Gallus gallus GN=COL1A2 PE=4 SV=1	tr|F1P0H9|F1P0H9_CHICK	R.GDPGPVGPVGP(+15.99)AGAFGPR.G	Y	24.82	1619.81	18	-0.6	810.909	2	22.28		F16:423	1	978	995	Oxidation or Hydroxylation	P11:Oxidation or Hydroxylation:0.00
1	5-H/GuHCl-P	GuHCl	5 mL/g	Solubilization	Precipitation	2	1	1	Collagen I, alpha 2	Collagen alpha-2(I) chain OS=Gallus gallus GN=COL1A2 PE=4 SV=1	tr|F1P0H9|F1P0H9_CHICK	R.GLP(+15.99)GIAGATGEP(+15.99)GPLGVSGP(+15.99)PGAR.G	Y	38.05	2132.09	24	1.3	1067.05	2	22.46		F16:429	4	882	905	Oxidation or Hydroxylation	P3:Oxidation or Hydroxylation:163.49;P12:Oxidation or Hydroxylation:39.76;P20:Oxidation or Hydroxylation:9.34
1	5-H/GuHCl-P	GuHCl	5 mL/g	Solubilization	Precipitation	2	1	1	Collagen I, alpha 2	Collagen alpha-2(I) chain OS=Gallus gallus GN=COL1A2 PE=4 SV=1	tr|F1P0H9|F1P0H9_CHICK	R.GLP(+15.99)GIAGATGEPGP(+15.99)LGVSGP(+15.99)PGAR.G	Y	21.8	2132.09	24	0.5	1067.05	2	23.79		F16:461	2	882	905	Oxidation or Hydroxylation	P3:Oxidation or Hydroxylation:74.73;P14:Oxidation or Hydroxylation:0.00;P20:Oxidation or Hydroxylation:0.00
1	5-H/GuHCl-P	GuHCl	5 mL/g	Solubilization	Precipitation	2	1	1	Collagen I, alpha 2	Collagen alpha-2(I) chain OS=Gallus gallus GN=COL1A2 PE=4 SV=1	tr|F1P0H9|F1P0H9_CHICK	D.FGPGPMGLM(+15.99)GPR.G	Y	23.37	1231.58	12	1	616.8	2	26		F16:512	1	87	98	Oxidation (M)	M9:Oxidation (M):0.00
1	5-H/GuHCl-P	GuHCl	5 mL/g	Solubilization	Precipitation	2	1	1	Collagen I, alpha 2	Collagen alpha-2(I) chain OS=Gallus gallus GN=COL1A2 PE=4 SV=1	tr|F1P0H9|F1P0H9_CHICK	K.AADFGPGP(+15.99)MGLM(+15.99)GPR.G	Y	37.74	1504.68	15	1.4	753.348	2	26.81		F16:530	1	84	98	Oxidation or Hydroxylation; Oxidation (M)	P8:Oxidation or Hydroxylation:55.92;M12:Oxidation (M):53.53
1	5-H/GuHCl-P	GuHCl	5 mL/g	Solubilization	Precipitation	2	1	1	Collagen I, alpha 2	Collagen alpha-2(I) chain OS=Gallus gallus GN=COL1A2 PE=4 SV=1	tr|F1P0H9|F1P0H9_CHICK	D.PSK(-1.03)AADFGPGPMGLMGPR.G	Y	23.4	1783.84	18	1.2	892.928	2	27.56		F16:550	2	81	98	Lysine oxidation to aminoadipic semialdehyde	K3:Lysine oxidation to aminoadipic semialdehyde:1000.00
1	5-H/GuHCl-P	GuHCl	5 mL/g	Solubilization	Precipitation	2	1	1	Collagen I, alpha 2	Collagen alpha-2(I) chain OS=Gallus gallus GN=COL1A2 PE=4 SV=1	tr|F1P0H9|F1P0H9_CHICK	A.DFGPGPMGLMGPR.G	Y	36.71	1330.62	13	0.3	666.316	2	27.59		F16:551	2	86	98
1	5-H/GuHCl-P	GuHCl	5 mL/g	Solubilization	Precipitation	2	1	1	Collagen I, alpha 2	Collagen alpha-2(I) chain OS=Gallus gallus GN=COL1A2 PE=4 SV=1	tr|F1P0H9|F1P0H9_CHICK	A.Q(-17.03)YDP(+15.99)SKAADFGPGPMGLMGPR.G	Y	23.23	2189.99	21	1.7	731.004	3	28.88		F16:578	2	78	98	Pyro-glu from Q; Oxidation or Hydroxylation	Q1:Pyro-glu from Q:1000.00;P4:Oxidation or Hydroxylation:14.04
1	5-H/GuHCl-P	GuHCl	5 mL/g	Solubilization	Precipitation	1	5	85	Collagen IV, alpha 6	Uncharacterized protein OS=Gallus gallus GN=COL4A6 PE=4 SV=2	tr|F1P3T8|F1P3T8_CHICK	R.GDVGPPGLPVLGAQ(+.98)EQA.L	Y	23	1604.8	17	6.9	803.415	2	22.3		F15:439	1	957	973	Deamidation (NQ)	Q14:Deamidation (NQ):0.00
1	5-H/GuHCl-P	GuHCl	5 mL/g	Solubilization	Precipitation	2	7	10	Decorin	Decorin OS=Gallus gallus GN=DCN PE=1 SV=1	P28675|PGS2_CHICK	K.IDAEGLSGLTNLAK.L	Y	33.84	1400.75	14	1.2	701.384	2	26.38		F16:520	1	234	247
1	5-H/GuHCl-P	GuHCl	5 mL/g	Solubilization	Precipitation	1	4	262	F1NBA6	Uncharacterized protein OS=Gallus gallus PE=4 SV=2	tr|F1NBA6|F1NBA6_CHICK	K.GDIGLP(+15.99)GPP(+15.99)GPPGLVG(+15.99).I	Y	27.25	1446.74	16	8.5	724.381	2	20.67		F15:386	2	2356	2371	Oxidation or Hydroxylation	P6:Oxidation or Hydroxylation:52.04;P9:Oxidation or Hydroxylation:14.02;G16:Oxidation or Hydroxylation:7.38
1	5-H/GuHCl-P	GuHCl	5 mL/g	Solubilization	Precipitation	1	8	1205	Keratin 8	Uncharacterized protein (Fragment) OS=Gallus gallus GN=KRT8 PE=3 SV=2	tr|H9KZP2|H9KZP2_CHICK	R.SLDLDSIIAEVK.A	Y	35.18	1301.71	12	0.8	651.862	2	32.14		F15:662	1	148	159
1	5-H/GuHCl-P	GuHCl	5 mL/g	Solubilization	Precipitation	1	3	8	Osteonectin	SPARC OS=Gallus gallus GN=SPARC PE=4 SV=1	tr|F1P291|F1P291_CHICK	K.EQDIDKDLVI	Y	22.88	1186.61	10	1	594.312	2	24.6		F15:500	1	289	298
1	5-H/GuHCl-P	GuHCl	5 mL/g	Solubilization	Precipitation	1	3	8	Osteonectin	SPARC OS=Gallus gallus GN=SPARC PE=4 SV=1	tr|F1P291|F1P291_CHICK	K.FIPAC(+57.02)LDTELTEFPLR.M	Y	40.12	1920.97	16	-0.1	961.49	2	33.04		F15:679	5	146	161	Carbamidomethylation	C5:Carbamidomethylation:1000.00
1	5-H/GuHCl-P	GuHCl	5 mL/g	Solubilization	Precipitation	2	3	8	Osteonectin	SPARC OS=Gallus gallus GN=SPARC PE=4 SV=1	tr|F1P291|F1P291_CHICK	K.NVLITLYERDEDNNLLTEK.Q	Y	27.82	2291.16	19	1.8	764.73	3	27.35		F16:544	2	168	186
1	5-H/GuHCl-P	GuHCl	5 mL/g	Solubilization	Precipitation	1	10	20	Vitronectin	Vitronectin OS=Gallus gallus PE=2 SV=1	tr|O12945|O12945_CHICK	K.LISDVWGIEGPIDAAFTR.I	Y	30.72	1959.01	18	1.1	980.513	2	34.58		F15:702	1	193	210
2	20-H/SDS-D	SDS	20 mL/g	Solubilization	Dialysis	1	3	7	Alpha-2-HS-glycoprotein	Uncharacterized protein OS=Gallus gallus GN=AHSG PE=4 SV=1	tr|E1BZE1|E1BZE1_CHICK	R.TFAEHAVEGDC(+57.02)DVK.L	Y	41.97	1576.68	14	1.1	789.35	2	19.27		F10:150	3	101	114	Carbamidomethylation	C11:Carbamidomethylation:1000.00
2	20-H/SDS-D	SDS	20 mL/g	Solubilization	Dialysis	1	3	7	Alpha-2-HS-glycoprotein	Uncharacterized protein OS=Gallus gallus GN=AHSG PE=4 SV=1	tr|E1BZE1|E1BZE1_CHICK	K.VNGQFSVLASK.C	Y	27.35	1148.62	11	1	575.317	2	24.22		F10:187	1	118	128
2	20-H/SDS-D	SDS	20 mL/g	Solubilization	Dialysis	1	3	7	Alpha-2-HS-glycoprotein	Uncharacterized protein OS=Gallus gallus GN=AHSG PE=4 SV=1	tr|E1BZE1|E1BZE1_CHICK	K.VN(-17.03)GQFSVLASK.C	Y	45.73	1131.59	11	0.6	566.804	2	38.42		F10:287	1	118	128	Ammonia-loss (N)	N2:Ammonia-loss (N):1000.00
2	20-H/SDS-D	SDS	20 mL/g	Solubilization	Dialysis	1	2	4	Collagen I, alpha 1	Collagen alpha-1(I) chain OS=Gallus gallus GN=COL1A1 PE=1 SV=3	P02457|CO1A1_CHICK	R.GEP(+15.99)GPAGLP(+15.99)GPAGER.G	Y	34.1	1392.66	15	0.4	697.339	2	17.14		F10:133	1	462	476	Oxidation or Hydroxylation	P3:Oxidation or Hydroxylation:14.04;P9:Oxidation or Hydroxylation:17.01
2	20-H/SDS-D	SDS	20 mL/g	Solubilization	Dialysis	1	2	4	Collagen I, alpha 1	Collagen alpha-1(I) chain OS=Gallus gallus GN=COL1A1 PE=1 SV=3	P02457|CO1A1_CHICK	R.GLTGPIGPP(+15.99)GPAGAPGD(+15.99)KGEAGPP(+15.99)GPAGPTGAR.G	Y	50.1	2878.42	33	0.8	960.482	3	20.78		F10:161	1	753	785	Oxidation or Hydroxylation	P9:Oxidation or Hydroxylation:49.79;D17:Oxidation or Hydroxylation:16.36;P24:Oxidation or Hydroxylation:5.16
2	20-H/SDS-D	SDS	20 mL/g	Solubilization	Dialysis	1	2	4	Collagen I, alpha 1	Collagen alpha-1(I) chain OS=Gallus gallus GN=COL1A1 PE=1 SV=3	P02457|CO1A1_CHICK	K.DGLNGLP(+15.99)GPIGP(+15.99)PGPR(+15.99).G	Y	28.11	1560.79	16	0.7	781.403	2	21.79		F10:169	1	1142	1157	Oxidation or Hydroxylation	P7:Oxidation or Hydroxylation:16.36;P12:Oxidation or Hydroxylation:10.11;R16:Oxidation or Hydroxylation:0.00
2	20-H/SDS-D	SDS	20 mL/g	Solubilization	Dialysis	1	2	4	Collagen I, alpha 1	Collagen alpha-1(I) chain OS=Gallus gallus GN=COL1A1 PE=1 SV=3	P02457|CO1A1_CHICK	K.ALLLQGANEIEIR.A	Y	30.96	1438.81	13	1.3	720.415	2	29.4		F10:223	1	1376	1388
2	20-H/SDS-D	SDS	20 mL/g	Solubilization	Dialysis	1	2	4	Collagen I, alpha 1	Collagen alpha-1(I) chain OS=Gallus gallus GN=COL1A1 PE=1 SV=3	P02457|CO1A1_CHICK	R.GLP(+15.99)GPP(+15.99)GAP(+15.99)GPQGF.Q	Y	30.12	1295.61	14	0.8	648.815	2	33.09		F10:249	1	177	190	Oxidation or Hydroxylation	P3:Oxidation or Hydroxylation:26.31;P6:Oxidation or Hydroxylation:33.98;P9:Oxidation or Hydroxylation:36.05
2	20-H/SDS-D	SDS	20 mL/g	Solubilization	Dialysis	1	2	4	Collagen I, alpha 1	Collagen alpha-1(I) chain OS=Gallus gallus GN=COL1A1 PE=1 SV=3	P02457|CO1A1_CHICK	R.GLTGPIGPP(+15.99)GPAGAPGD(+15.99)KGEAGP(+15.99)PGPAGPTGAR.G	Y	38.21	2878.42	33	4.8	960.486	3	47.25		F10:366	1	753	785	Oxidation or Hydroxylation	P9:Oxidation or Hydroxylation:10.11;D17:Oxidation or Hydroxylation:0.00;P23:Oxidation or Hydroxylation:0.00
2	20-H/SDS-D	SDS	20 mL/g	Solubilization	Dialysis	2	2	4	Collagen I, alpha 1	Collagen alpha-1(I) chain OS=Gallus gallus GN=COL1A1 PE=1 SV=3	P02457|CO1A1_CHICK	R.GSAGPP(+15.99)GATGFP(+15.99)GAAGR.V	Y	62.62	1458.69	17	0.8	730.35	2	15.18		F9:144	4	855	871	Oxidation or Hydroxylation	P6:Oxidation or Hydroxylation:11.06;P12:Oxidation or Hydroxylation:40.00
2	20-H/SDS-D	SDS	20 mL/g	Solubilization	Dialysis	2	2	4	Collagen I, alpha 1	Collagen alpha-1(I) chain OS=Gallus gallus GN=COL1A1 PE=1 SV=3	P02457|CO1A1_CHICK	K.GLTGSP(+15.99)GSP(+15.99)GPDGK.T	Y	28.66	1257.58	14	1.1	629.8	2	43.39		F9:352	1	528	541	Oxidation or Hydroxylation	P6:Oxidation or Hydroxylation:119.54;P9:Oxidation or Hydroxylation:45.01
2	20-H/SDS-D	SDS	20 mL/g	Solubilization	Dialysis	2	2	4	Collagen I, alpha 1	Collagen alpha-1(I) chain OS=Gallus gallus GN=COL1A1 PE=1 SV=3	P02457|CO1A1_CHICK	R.GVQGPP(+15.99)GPQGPR.G	Y	58.86	1161.59	12	0.5	581.802	2	43.84		F9:358	1	675	686	Oxidation or Hydroxylation	P6:Oxidation or Hydroxylation:14.02
2	20-H/SDS-D	SDS	20 mL/g	Solubilization	Dialysis	1	1	1	Collagen I, alpha 2	Collagen alpha-2(I) chain OS=Gallus gallus GN=COL1A2 PE=4 SV=1	tr|F1P0H9|F1P0H9_CHICK	K.GPNGDAGRP(+15.99)GEP(+15.99)GLM(+15.99)GPR.G	Y	33.69	1781.81	18	1.1	594.945	3	15		F10:115	1	432	449	Oxidation or Hydroxylation; Oxidation (M)	P9:Oxidation or Hydroxylation:33.98;P12:Oxidation or Hydroxylation:22.07;M15:Oxidation (M):1000.00
2	20-H/SDS-D	SDS	20 mL/g	Solubilization	Dialysis	1	1	1	Collagen I, alpha 2	Collagen alpha-2(I) chain OS=Gallus gallus GN=COL1A2 PE=4 SV=1	tr|F1P0H9|F1P0H9_CHICK	R.GSNGEP(+15.99)GSAGPP(+15.99)GPAGLR.G	Y	33.16	1608.75	18	1.4	805.383	2	16.07		F10:123	1	381	398	Oxidation or Hydroxylation	P6:Oxidation or Hydroxylation:12.33;P12:Oxidation or Hydroxylation:11.06
2	20-H/SDS-D	SDS	20 mL/g	Solubilization	Dialysis	1	1	1	Collagen I, alpha 2	Collagen alpha-2(I) chain OS=Gallus gallus GN=COL1A2 PE=4 SV=1	tr|F1P0H9|F1P0H9_CHICK	R.GDAGPP(+31.99)GMTGFP(+15.99)GAAGR.V	Y	28.55	1562.68	17	1.1	782.347	2	16.33		F10:126	1	777	793	Dihydroxy; Oxidation or Hydroxylation	P6:Dihydroxy:14.02;P12:Oxidation or Hydroxylation:10.19
2	20-H/SDS-D	SDS	20 mL/g	Solubilization	Dialysis	1	1	1	Collagen I, alpha 2	Collagen alpha-2(I) chain OS=Gallus gallus GN=COL1A2 PE=4 SV=1	tr|F1P0H9|F1P0H9_CHICK	R.GAP(+15.99)GNPGPSGALGAP(+15.99)GPHGQVGPSGKP(+15.99)GNR.G	Y	30.19	2692.31	30	1.5	898.444	3	18.17		F10:142	1	948	977	Oxidation or Hydroxylation	P3:Oxidation or Hydroxylation:26.31;P15:Oxidation or Hydroxylation:0.00;P27:Oxidation or Hydroxylation:0.00
2	20-H/SDS-D	SDS	20 mL/g	Solubilization	Dialysis	1	1	1	Collagen I, alpha 2	Collagen alpha-2(I) chain OS=Gallus gallus GN=COL1A2 PE=4 SV=1	tr|F1P0H9|F1P0H9_CHICK	R.GLRGDVGPVGR.T	Y	40.12	1081.6	11	0.5	541.807	2	18.6		F10:145	1	819	829
2	20-H/SDS-D	SDS	20 mL/g	Solubilization	Dialysis	1	1	1	Collagen I, alpha 2	Collagen alpha-2(I) chain OS=Gallus gallus GN=COL1A2 PE=4 SV=1	tr|F1P0H9|F1P0H9_CHICK	K.GETGPAGPP(+15.99)GFQGLP(+15.99)GPSGPAGEAGKPGER(+15.99).G	Y	42.34	2776.31	30	1.4	926.444	3	21.68		F10:168	1	543	572	Oxidation or Hydroxylation	P9:Oxidation or Hydroxylation:14.02;P15:Oxidation or Hydroxylation:8.22;R30:Oxidation or Hydroxylation:8.26
2	20-H/SDS-D	SDS	20 mL/g	Solubilization	Dialysis	1	1	1	Collagen I, alpha 2	Collagen alpha-2(I) chain OS=Gallus gallus GN=COL1A2 PE=4 SV=1	tr|F1P0H9|F1P0H9_CHICK	R.GLHGEFGVP(+15.99)GPAGPR.G	Y	40.85	1462.73	15	1.5	732.374	2	22.09		F10:171	1	573	587	Oxidation or Hydroxylation	P9:Oxidation or Hydroxylation:6.67
2	20-H/SDS-D	SDS	20 mL/g	Solubilization	Dialysis	1	1	1	Collagen I, alpha 2	Collagen alpha-2(I) chain OS=Gallus gallus GN=COL1A2 PE=4 SV=1	tr|F1P0H9|F1P0H9_CHICK	K.GPKGETGPTGAIGPIGASGPP(+15.99)GPVGAAGPAGPR.G	Y	26.15	2820.45	33	1.3	941.159	3	23.13		F10:179	1	744	776	Oxidation or Hydroxylation	P21:Oxidation or Hydroxylation:17.01
2	20-H/SDS-D	SDS	20 mL/g	Solubilization	Dialysis	1	1	1	Collagen I, alpha 2	Collagen alpha-2(I) chain OS=Gallus gallus GN=COL1A2 PE=4 SV=1	tr|F1P0H9|F1P0H9_CHICK	R.GDP(+15.99)GPVGPVGPAGAFGPR.G	Y	54.04	1619.81	18	0.8	810.911	2	24.12		F10:186	2	978	995	Oxidation or Hydroxylation	P3:Oxidation or Hydroxylation:10.11
2	20-H/SDS-D	SDS	20 mL/g	Solubilization	Dialysis	1	1	1	Collagen I, alpha 2	Collagen alpha-2(I) chain OS=Gallus gallus GN=COL1A2 PE=4 SV=1	tr|F1P0H9|F1P0H9_CHICK	R.GAP(+15.99)GNPGPSGALGAP(+15.99)GPHGQVGPSGKPGN(+15.99)R.G	Y	25.47	2692.31	30	0.9	674.085	4	27.97		F10:213	1	948	977	Oxidation or Hydroxylation	P3:Oxidation or Hydroxylation:14.04;P15:Oxidation or Hydroxylation:4.64;N29:Oxidation or Hydroxylation:0.00
2	20-H/SDS-D	SDS	20 mL/g	Solubilization	Dialysis	1	1	1	Collagen I, alpha 2	Collagen alpha-2(I) chain OS=Gallus gallus GN=COL1A2 PE=4 SV=1	tr|F1P0H9|F1P0H9_CHICK	R.GASGPVGAKGPNGDAGR(+15.99)PGEP(+31.99)GLMGPR.G	Y	31.67	2506.2	27	0.1	627.557	4	30.83		F10:233	1	423	449	Oxidation or Hydroxylation; Dihydroxy	R17:Oxidation or Hydroxylation:0.00;P21:Dihydroxy:0.00
2	20-H/SDS-D	SDS	20 mL/g	Solubilization	Dialysis	1	1	1	Collagen I, alpha 2	Collagen alpha-2(I) chain OS=Gallus gallus GN=COL1A2 PE=4 SV=1	tr|F1P0H9|F1P0H9_CHICK	R.VGP(+15.99)P(+15.99)GPAGITGPP(+15.99)GPP(+15.99)GPAGK.D	Y	45.37	1840.93	21	1.6	921.475	2	43.29		F10:330	1	794	814	Oxidation or Hydroxylation	P3:Oxidation or Hydroxylation:16.66;P4:Oxidation or Hydroxylation:4.64;P13:Oxidation or Hydroxylation:27.96;P16:Oxidation or Hydroxylation:27.96
2	20-H/SDS-D	SDS	20 mL/g	Solubilization	Dialysis	1	1	1	Collagen I, alpha 2	Collagen alpha-2(I) chain OS=Gallus gallus GN=COL1A2 PE=4 SV=1	tr|F1P0H9|F1P0H9_CHICK	R.GLP(+15.99)GESGAVGPAGPIGSR.G	Y	40.42	1593.81	18	1.6	797.914	2	44.18		F10:339	1	591	608	Oxidation or Hydroxylation	P3:Oxidation or Hydroxylation:112.87
2	20-H/SDS-D	SDS	20 mL/g	Solubilization	Dialysis	1	1	1	Collagen I, alpha 2	Collagen alpha-2(I) chain OS=Gallus gallus GN=COL1A2 PE=4 SV=1	tr|F1P0H9|F1P0H9_CHICK	R.VGPIGPAGNRGEP(+15.99)GNIGFP(+15.99)GPK.G	Y	38.43	2119.08	22	0.8	707.368	3	48.28		F10:373	1	476	497	Oxidation or Hydroxylation	P13:Oxidation or Hydroxylation:0.00;P19:Oxidation or Hydroxylation:0.00
2	20-H/SDS-D	SDS	20 mL/g	Solubilization	Dialysis	1	1	1	Collagen I, alpha 2	Collagen alpha-2(I) chain OS=Gallus gallus GN=COL1A2 PE=4 SV=1	tr|F1P0H9|F1P0H9_CHICK	R.VGPIGPAGNRGEP(+15.99)GNIGFPGPK(+15.99).G	Y	28.35	2119.08	22	1.2	707.369	3	12.54		F10:97	2	476	497	Oxidation or Hydroxylation	P13:Oxidation or Hydroxylation:5.99;K22:Oxidation or Hydroxylation:0.00
2	20-H/SDS-D	SDS	20 mL/g	Solubilization	Dialysis	2	1	1	Collagen I, alpha 2	Collagen alpha-2(I) chain OS=Gallus gallus GN=COL1A2 PE=4 SV=1	tr|F1P0H9|F1P0H9_CHICK	K.EGPVGFP(+15.99)GADGR.V	Y	46.2	1173.54	12	0.6	587.778	2	17.43		F9:161	2	464	475	Oxidation or Hydroxylation	P7:Oxidation or Hydroxylation:17.01
2	20-H/SDS-D	SDS	20 mL/g	Solubilization	Dialysis	2	1	1	Collagen I, alpha 2	Collagen alpha-2(I) chain OS=Gallus gallus GN=COL1A2 PE=4 SV=1	tr|F1P0H9|F1P0H9_CHICK	R.GLP(+15.99)GIAGAT.G	Y	31.2	771.413	9	1.3	772.421	1	35.52		F9:286	1	882	890	Oxidation or Hydroxylation	P3:Oxidation or Hydroxylation:1000.00
2	20-H/SDS-D	SDS	20 mL/g	Solubilization	Dialysis	2	1	1	Collagen I, alpha 2	Collagen alpha-2(I) chain OS=Gallus gallus GN=COL1A2 PE=4 SV=1	tr|F1P0H9|F1P0H9_CHICK	R.GAP(+15.99)GPEGNNGAQGPP(+15.99)GVTGNQGAK.G	Y	31.49	2162.99	24	0.8	1082.51	2	41.04		F9:326	1	519	542	Oxidation or Hydroxylation	P3:Oxidation or Hydroxylation:26.31;P15:Oxidation or Hydroxylation:14.02
2	20-H/SDS-D	SDS	20 mL/g	Solubilization	Dialysis	2	1	1	Collagen I, alpha 2	Collagen alpha-2(I) chain OS=Gallus gallus GN=COL1A2 PE=4 SV=1	tr|F1P0H9|F1P0H9_CHICK	R.GDAGPP(+15.99)GM(+15.99)TGFP(+15.99)GAAGR.V	Y	53.9	1562.68	17	1.1	782.347	2	42.8		F9:342	1	777	793	Oxidation or Hydroxylation; Oxidation (M)	P6:Oxidation or Hydroxylation:14.02;M8:Oxidation (M):1000.00;P12:Oxidation or Hydroxylation:40.00
2	20-H/SDS-D	SDS	20 mL/g	Solubilization	Dialysis	2	1	1	Collagen I, alpha 2	Collagen alpha-2(I) chain OS=Gallus gallus GN=COL1A2 PE=4 SV=1	tr|F1P0H9|F1P0H9_CHICK	G.PSGEEGKRGA(sub S)NGEPGSAGPP(+15.99)GPAGLR.G	Y	25.41	2417.17	26	6.3	806.735	3	42.92		F9:345	1	373	398	Oxidation or Hydroxylation; Mutation	P20:Oxidation or Hydroxylation:17.01
2	20-H/SDS-D	SDS	20 mL/g	Solubilization	Dialysis	2	6	2182	Myeloid	Myeloid protein 1 OS=Gallus gallus GN=MIM1 PE=1 SV=2	P08940|MIM1_CHICK	K.LVC(+57.02)IHPIR.Y	Y	45.92	1006.57	8	0.2	504.295	2	17.27		F9:160	1	116	123	Carbamidomethylation	C3:Carbamidomethylation:1000.00
2	20-H/SDS-P	SDS	20 mL/g	Solubilization	Preciptiation	2	18	13408	Actin beta-like 2	Uncharacterized protein OS=Gallus gallus GN=ACTBL2 PE=3 SV=2	tr|F1N8P3|F1N8P3_CHICK	R.AVFPSIVGRPR.H	Y	21.29	1197.7	11	1	599.857	2	22.44		F12:370	1	31	41
2	20-H/SDS-P	SDS	20 mL/g	Solubilization	Preciptiation	2	18	13408	Actin beta-like 2	Uncharacterized protein OS=Gallus gallus GN=ACTBL2 PE=3 SV=2	tr|F1N8P3|F1N8P3_CHICK	K.SYELPDGQVITIGNER.F	Y	32.88	1789.88	16	2.7	895.952	2	27.98		F12:521	1	241	256
2	20-H/SDS-P	SDS	20 mL/g	Solubilization	Preciptiation	1	5	7	Alpha-2-HS-glycoprotein	Uncharacterized protein OS=Gallus gallus GN=AHSG PE=4 SV=1	tr|E1BZE1|E1BZE1_CHICK	R.AAAEVAQHDKVPHPVGFVPPPPLC(+57.02)PGK.I	Y	23.4	2814.46	27	0.8	704.624	4	21.96		F11:348	4	312	338	Carbamidomethylation	C24:Carbamidomethylation:1000.00
2	20-H/SDS-P	SDS	20 mL/g	Solubilization	Preciptiation	1	5	7	Alpha-2-HS-glycoprotein	Uncharacterized protein OS=Gallus gallus GN=AHSG PE=4 SV=1	tr|E1BZE1|E1BZE1_CHICK	K.VN(+.98)GQFSVLASK.C	Y	49.69	1149.6	11	0.9	575.809	2	22.21		F11:356	1	118	128	Deamidation (NQ)	N2:Deamidation (NQ):26.31
2	20-H/SDS-P	SDS	20 mL/g	Solubilization	Preciptiation	1	5	7	Alpha-2-HS-glycoprotein	Uncharacterized protein OS=Gallus gallus GN=AHSG PE=4 SV=1	tr|E1BZE1|E1BZE1_CHICK	C.QLLPEDQSNFGFC(+57.02)TAK.M	Y	35.68	1853.86	16	0.7	927.939	2	26.76		F11:490	2	219	234	Carbamidomethylation	C13:Carbamidomethylation:1000.00
2	20-H/SDS-P	SDS	20 mL/g	Solubilization	Preciptiation	1	5	7	Alpha-2-HS-glycoprotein	Uncharacterized protein OS=Gallus gallus GN=AHSG PE=4 SV=1	tr|E1BZE1|E1BZE1_CHICK	K.QYHPVQ(sub R)MVSVEFAVA.A	Y	15.75	1703.83	15	1.2	852.925	2	30.82		F11:589	1	188	202	Mutation
2	20-H/SDS-P	SDS	20 mL/g	Solubilization	Preciptiation	1	5	7	Alpha-2-HS-glycoprotein	Uncharacterized protein OS=Gallus gallus GN=AHSG PE=4 SV=1	tr|E1BZE1|E1BZE1_CHICK	K.ISHNNPVAS(+79.97)ESSSS(+79.97)EFPSLL.S	Y	20.35	2260.93	20	1.1	1131.47	2	32.72		F11:632	1	284	303	Phosphorylation (STY)	S9:Phosphorylation (STY):0.00;S14:Phosphorylation (STY):7.77
2	20-H/SDS-P	SDS	20 mL/g	Solubilization	Preciptiation	1	5	7	Alpha-2-HS-glycoprotein	Uncharacterized protein OS=Gallus gallus GN=AHSG PE=4 SV=1	tr|E1BZE1|E1BZE1_CHICK	S.SALNDYNSKNPDVYLM(+15.99)LLEIGR.A	Y	12.34	2540.26	22	1.3	847.761	3	32.92		F11:638	1	163	184	Oxidation (M)	M16:Oxidation (M):1000.00
2	20-H/SDS-P	SDS	20 mL/g	Solubilization	Preciptiation	1	5	7	Alpha-2-HS-glycoprotein	Uncharacterized protein OS=Gallus gallus GN=AHSG PE=4 SV=1	tr|E1BZE1|E1BZE1_CHICK	K.NPDVYLML.L	Y	14.92	963.473	8	1.7	964.482	1	35.44		F11:689	1	172	179
2	20-H/SDS-P	SDS	20 mL/g	Solubilization	Preciptiation	1	5	7	Alpha-2-HS-glycoprotein	Uncharacterized protein OS=Gallus gallus GN=AHSG PE=4 SV=1	tr|E1BZE1|E1BZE1_CHICK	K.NPDVYLMLLEIGR.A	Y	46.15	1531.81	13	0.6	766.911	2	38		F11:733	2	172	184
2	20-H/SDS-P	SDS	20 mL/g	Solubilization	Preciptiation	2	5	7	Alpha-2-HS-glycoprotein	Uncharacterized protein OS=Gallus gallus GN=AHSG PE=4 SV=1	tr|E1BZE1|E1BZE1_CHICK	R.TFAEHAVEGDC(+57.02)DVK.L	Y	53.35	1576.68	14	1	789.349	2	15.49		F12:156	8	101	114	Carbamidomethylation	C11:Carbamidomethylation:1000.00
2	20-H/SDS-P	SDS	20 mL/g	Solubilization	Preciptiation	2	5	7	Alpha-2-HS-glycoprotein	Uncharacterized protein OS=Gallus gallus GN=AHSG PE=4 SV=1	tr|E1BZE1|E1BZE1_CHICK	K.LQKVN(+.98)GQFSVL.A	Y	20.22	1232.68	11	0.8	617.346	2	26.77		F12:494	2	115	125	Deamidation (NQ)	N5:Deamidation (NQ):11.10
2	20-H/SDS-P	SDS	20 mL/g	Solubilization	Preciptiation	2	5	7	Alpha-2-HS-glycoprotein	Uncharacterized protein OS=Gallus gallus GN=AHSG PE=4 SV=1	tr|E1BZE1|E1BZE1_CHICK	K.NPDVYLM.L	Y	21.59	850.389	7	0.3	851.397	1	28.22		F12:528	1	172	178
2	20-H/SDS-P	SDS	20 mL/g	Solubilization	Preciptiation	2	5	7	Alpha-2-HS-glycoprotein	Uncharacterized protein OS=Gallus gallus GN=AHSG PE=4 SV=1	tr|E1BZE1|E1BZE1_CHICK	K.D(+57.02)NLAACQLLPEDQSNFGFC(+57.02)TAK.M	Y	31.76	2498.12	22	1.4	1250.07	2	29.02		F12:547	2	213	234	Carbamidomethylation (DHKE X@N-term); Carbamidomethylation	D1:Carbamidomethylation (DHKE X@N-term):32.22;C19:Carbamidomethylation:1000.00
2	20-H/SDS-P	SDS	20 mL/g	Solubilization	Preciptiation	2	5	7	Alpha-2-HS-glycoprotein	Uncharacterized protein OS=Gallus gallus GN=AHSG PE=4 SV=1	tr|E1BZE1|E1BZE1_CHICK	K.DNLAAC(+57.02)QLLPEDQSNFGFC(+57.02)TAK.M	Y	16.75	2498.12	22	2	1250.07	2	29.3		F12:555	1	213	234	Carbamidomethylation	C6:Carbamidomethylation:1000.00;C19:Carbamidomethylation:1000.00
2	20-H/SDS-P	SDS	20 mL/g	Solubilization	Preciptiation	2	5	7	Alpha-2-HS-glycoprotein	Uncharacterized protein OS=Gallus gallus GN=AHSG PE=4 SV=1	tr|E1BZE1|E1BZE1_CHICK	K.ISHNNPVAS(+79.97)ESSSSEFPSLL.S	Y	15.49	2180.96	20	1.5	1091.49	2	30.96		F12:591	1	284	303	Phosphorylation (STY)	S9:Phosphorylation (STY):0.00
2	20-H/SDS-P	SDS	20 mL/g	Solubilization	Preciptiation	2	5	7	Alpha-2-HS-glycoprotein	Uncharacterized protein OS=Gallus gallus GN=AHSG PE=4 SV=1	tr|E1BZE1|E1BZE1_CHICK	K.ISHNNPVAS(+79.97)ES(+79.97)SSSEFPSLL.S	Y	21.36	2260.93	20	1.7	1131.47	2	32.56		F12:624	1	284	303	Phosphorylation (STY)	S9:Phosphorylation (STY):9.42;S11:Phosphorylation (STY):7.21
2	20-H/SDS-P	SDS	20 mL/g	Solubilization	Preciptiation	2	5	7	Alpha-2-HS-glycoprotein	Uncharacterized protein OS=Gallus gallus GN=AHSG PE=4 SV=1	tr|E1BZE1|E1BZE1_CHICK	K.NPDVYLM(+15.99)LLEIGR.A	Y	38.58	1547.8	13	0.9	774.909	2	34.21		F12:661	1	172	184	Oxidation (M)	M7:Oxidation (M):1000.00
2	20-H/SDS-P	SDS	20 mL/g	Solubilization	Preciptiation	1	20	13414	Annexin A2	Annexin A2 OS=Gallus gallus GN=ANXA2 PE=1 SV=2	P17785|ANXA2_CHICK	K.SALSGHLEAVILGLLK.T	Y	34.45	1619.96	16	0.1	810.988	2	40.69		F11:763	2	89	104
2	20-H/SDS-P	SDS	20 mL/g	Solubilization	Preciptiation	1	3	6	Apolipoprotein	Apolipoprotein A-I OS=Gallus gallus GN=APOA1 PE=1 SV=2	P08250|APOA1_CHICK	R.AELTKDLEEVKEK.I	Y	54.96	1530.81	13	1.3	766.415	2	17.77		F11:218	3	107	119
2	20-H/SDS-P	SDS	20 mL/g	Solubilization	Preciptiation	1	3	6	Apolipoprotein	Apolipoprotein A-I OS=Gallus gallus GN=APOA1 PE=1 SV=2	P08250|APOA1_CHICK	K.WTEELEQYR.Q	Y	45.81	1252.57	9	0.7	627.294	2	22.13		F11:353	3	131	139
2	20-H/SDS-P	SDS	20 mL/g	Solubilization	Preciptiation	1	3	6	Apolipoprotein	Apolipoprotein A-I OS=Gallus gallus GN=APOA1 PE=1 SV=2	P08250|APOA1_CHICK	K.W(+31.99)TEELEQYR.Q	Y	38.97	1284.56	9	0.7	643.289	2	22.33		F11:360	1	131	139	Dihydroxy	W1:Dihydroxy:50.34
2	20-H/SDS-P	SDS	20 mL/g	Solubilization	Preciptiation	1	3	6	Apolipoprotein	Apolipoprotein A-I OS=Gallus gallus GN=APOA1 PE=1 SV=2	P08250|APOA1_CHICK	K.W(+31.99)TEELEQYR(+15.99).Q	Y	14.07	1300.56	9	0.8	651.286	2	22.37		F11:361	1	131	139	Dihydroxy; Oxidation or Hydroxylation	W1:Dihydroxy:34.75;R9:Oxidation or Hydroxylation:8.14
2	20-H/SDS-P	SDS	20 mL/g	Solubilization	Preciptiation	1	3	6	Apolipoprotein	Apolipoprotein A-I OS=Gallus gallus GN=APOA1 PE=1 SV=2	P08250|APOA1_CHICK	K.M(+15.99)TPLVQEFR.E	Y	48.99	1135.57	9	0.4	568.792	2	22.58		F11:368	3	230	238	Oxidation (M)	M1:Oxidation (M):1000.00
2	20-H/SDS-P	SDS	20 mL/g	Solubilization	Preciptiation	1	3	6	Apolipoprotein	Apolipoprotein A-I OS=Gallus gallus GN=APOA1 PE=1 SV=2	P08250|APOA1_CHICK	R.EM(+15.99)WLKDTEALR.A	Y	46.67	1406.69	11	0.6	704.351	2	22.75		F11:374	4	96	106	Oxidation (M)	M2:Oxidation (M):1000.00
2	20-H/SDS-P	SDS	20 mL/g	Solubilization	Preciptiation	1	3	6	Apolipoprotein	Apolipoprotein A-I OS=Gallus gallus GN=APOA1 PE=1 SV=2	P08250|APOA1_CHICK	K.ASGKDAIAQFESSAVGK.Q	Y	47.71	1664.84	17	1.3	833.427	2	23.04		F11:382	4	47	63
2	20-H/SDS-P	SDS	20 mL/g	Solubilization	Preciptiation	1	3	6	Apolipoprotein	Apolipoprotein A-I OS=Gallus gallus GN=APOA1 PE=1 SV=2	P08250|APOA1_CHICK	R.IRDM(+15.99)VDVYLETVK.A	Y	43.03	1595.82	13	1.3	532.949	3	24.14		F11:416	5	34	46	Oxidation (M)	M4:Oxidation (M):1000.00
2	20-H/SDS-P	SDS	20 mL/g	Solubilization	Preciptiation	1	3	6	Apolipoprotein	Apolipoprotein A-I OS=Gallus gallus GN=APOA1 PE=1 SV=2	P08250|APOA1_CHICK	R.IRD(+15.99)MVDVYLETVK.A	Y	38.7	1595.82	13	0.2	532.948	3	24.28		F11:421	1	34	46	Oxidation or Hydroxylation	D3:Oxidation or Hydroxylation:0.00
2	20-H/SDS-P	SDS	20 mL/g	Solubilization	Preciptiation	1	3	6	Apolipoprotein	Apolipoprotein A-I OS=Gallus gallus GN=APOA1 PE=1 SV=2	P08250|APOA1_CHICK	K.MTPLVQEFR.E	Y	49.55	1119.57	9	0.8	560.795	2	25.79		F11:463	3	230	238
2	20-H/SDS-P	SDS	20 mL/g	Solubilization	Preciptiation	1	3	6	Apolipoprotein	Apolipoprotein A-I OS=Gallus gallus GN=APOA1 PE=1 SV=2	P08250|APOA1_CHICK	K.IRPFLDQFSAK.W	Y	48.98	1320.72	11	0.6	441.247	3	26.17		F11:473	7	120	130
2	20-H/SDS-P	SDS	20 mL/g	Solubilization	Preciptiation	1	3	6	Apolipoprotein	Apolipoprotein A-I OS=Gallus gallus GN=APOA1 PE=1 SV=2	P08250|APOA1_CHICK	R.LTPVAQELKELTK.Q	Y	17.75	1468.85	13	1.1	735.433	2	27.93		F11:518	3	142	154
2	20-H/SDS-P	SDS	20 mL/g	Solubilization	Preciptiation	1	3	6	Apolipoprotein	Apolipoprotein A-I OS=Gallus gallus GN=APOA1 PE=1 SV=2	P08250|APOA1_CHICK	K.DTEALRAELTKDLEEVKEK.I	Y	44.16	2216.15	19	0.5	555.046	4	28.43		F11:531	1	101	119
2	20-H/SDS-P	SDS	20 mL/g	Solubilization	Preciptiation	1	3	6	Apolipoprotein	Apolipoprotein A-I OS=Gallus gallus GN=APOA1 PE=1 SV=2	P08250|APOA1_CHICK	R.DMVDVYLETVK.A	Y	34.41	1310.64	11	0.7	656.329	2	30.49		F11:582	1	36	46
2	20-H/SDS-P	SDS	20 mL/g	Solubilization	Preciptiation	1	3	6	Apolipoprotein	Apolipoprotein A-I OS=Gallus gallus GN=APOA1 PE=1 SV=2	P08250|APOA1_CHICK	R.LISFLDELQKS.V	Y	33.6	1291.7	11	0.5	646.859	2	32.89		F11:637	1	252	262
2	20-H/SDS-P	SDS	20 mL/g	Solubilization	Preciptiation	1	3	6	Apolipoprotein	Apolipoprotein A-I OS=Gallus gallus GN=APOA1 PE=1 SV=2	P08250|APOA1_CHICK	R.EM(+15.99)WLKDTEALRAELTKDLEEVKEK.I	Y	43.56	2919.49	24	1	584.906	5	34.03		F11:661	7	96	119	Oxidation (M)	M2:Oxidation (M):1000.00
2	20-H/SDS-P	SDS	20 mL/g	Solubilization	Preciptiation	2	3	6	Apolipoprotein	Apolipoprotein A-I OS=Gallus gallus GN=APOA1 PE=1 SV=2	P08250|APOA1_CHICK	K.VM(+15.99)EQLSNLR.E	Y	36.65	1104.56	9	0.6	553.288	2	17.17		F12:202	2	219	227	Oxidation (M)	M2:Oxidation (M):1000.00
2	20-H/SDS-P	SDS	20 mL/g	Solubilization	Preciptiation	2	3	6	Apolipoprotein	Apolipoprotein A-I OS=Gallus gallus GN=APOA1 PE=1 SV=2	P08250|APOA1_CHICK	K.ASGKDAIAQFESS.A	Y	38.8	1309.62	13	0.5	655.815	2	21.12		F12:328	2	47	59
2	20-H/SDS-P	SDS	20 mL/g	Solubilization	Preciptiation	2	3	6	Apolipoprotein	Apolipoprotein A-I OS=Gallus gallus GN=APOA1 PE=1 SV=2	P08250|APOA1_CHICK	K.NLAPYSDELR.Q	Y	34.57	1176.58	10	0.6	589.296	2	21.15		F12:329	3	185	194
2	20-H/SDS-P	SDS	20 mL/g	Solubilization	Preciptiation	2	3	6	Apolipoprotein	Apolipoprotein A-I OS=Gallus gallus GN=APOA1 PE=1 SV=2	P08250|APOA1_CHICK	K.W(+29.97)TEELEQYR.Q	Y	24.53	1282.55	9	0	642.28	2	22.17		F12:361	1	131	139	Quinone	W1:Quinone:104.80
2	20-H/SDS-P	SDS	20 mL/g	Solubilization	Preciptiation	2	3	6	Apolipoprotein	Apolipoprotein A-I OS=Gallus gallus GN=APOA1 PE=1 SV=2	P08250|APOA1_CHICK	K.LADNLDTLSAAAAK.L	Y	47.33	1372.72	14	0.8	687.368	2	22.51		F12:372	3	69	82
2	20-H/SDS-P	SDS	20 mL/g	Solubilization	Preciptiation	2	3	6	Apolipoprotein	Apolipoprotein A-I OS=Gallus gallus GN=APOA1 PE=1 SV=2	P08250|APOA1_CHICK	K.DAIAQFESSAVGK.Q	Y	34.61	1321.65	13	0.7	661.833	2	24.91		F12:444	1	51	63
2	20-H/SDS-P	SDS	20 mL/g	Solubilization	Preciptiation	2	3	6	Apolipoprotein	Apolipoprotein A-I OS=Gallus gallus GN=APOA1 PE=1 SV=2	P08250|APOA1_CHICK	K.IRPF(+15.99)LDQFSAK.W	Y	32.49	1336.71	11	1.3	669.365	2	25.77		F12:468	1	120	130	Oxidation or Hydroxylation	F4:Oxidation or Hydroxylation:0.00
2	20-H/SDS-P	SDS	20 mL/g	Solubilization	Preciptiation	2	3	6	Apolipoprotein	Apolipoprotein A-I OS=Gallus gallus GN=APOA1 PE=1 SV=2	P08250|APOA1_CHICK	R.EM(+15.99)WLKDTEALRAELTK.D	Y	49.06	1948.99	16	0.9	650.672	3	27.84		F12:517	1	96	111	Oxidation (M)	M2:Oxidation (M):1000.00
2	20-H/SDS-P	SDS	20 mL/g	Solubilization	Preciptiation	2	3	6	Apolipoprotein	Apolipoprotein A-I OS=Gallus gallus GN=APOA1 PE=1 SV=2	P08250|APOA1_CHICK	K.IRPFLDQF.S	Y	29.13	1034.55	8	0.4	518.285	2	31.56		F12:602	2	120	127
2	20-H/SDS-P	SDS	20 mL/g	Solubilization	Preciptiation	2	3	6	Apolipoprotein	Apolipoprotein A-I OS=Gallus gallus GN=APOA1 PE=1 SV=2	P08250|APOA1_CHICK	R.LISFLDELQK.S	Y	38.84	1204.67	10	0.7	603.343	2	32.17		F12:615	4	252	261
2	20-H/SDS-P	SDS	20 mL/g	Solubilization	Preciptiation	2	27	618	Collagen XI, alpha 1	Uncharacterized protein OS=Gallus gallus GN=COL11A1 PE=4 SV=2	tr|F1P4K9|F1P4K9_CHICK	R.ILDEEVFEGEIQQLLIIADPR.A	Y	25.31	2439.29	21	1.6	814.105	3	43.28		F12:786	1	213	233
2	20-H/SDS-P	SDS	20 mL/g	Solubilization	Preciptiation	1	2	4	Collagen I, alpha 1	Collagen alpha-1(I) chain OS=Gallus gallus GN=COL1A1 PE=1 SV=3	P02457|CO1A1_CHICK	L.QGPP(+15.99)GPP(+15.99)GAP(+15.99)GEQGPSGASGPAGPR.G	Y	26.21	2227.03	25	0.8	743.35	3	14.11		F11:117	1	1106	1130	Oxidation or Hydroxylation	P4:Oxidation or Hydroxylation:0.00;P7:Oxidation or Hydroxylation:33.98;P10:Oxidation or Hydroxylation:67.69
2	20-H/SDS-P	SDS	20 mL/g	Solubilization	Preciptiation	1	2	4	Collagen I, alpha 1	Collagen alpha-1(I) chain OS=Gallus gallus GN=COL1A1 PE=1 SV=3	P02457|CO1A1_CHICK	L.QGPP(+15.99)GP(+15.99)PGAP(+15.99)GEQGPSGASGPAGPR.G	Y	19.78	2227.03	25	2.1	1114.52	2	14.15		F11:118	1	1106	1130	Oxidation or Hydroxylation	P4:Oxidation or Hydroxylation:11.06;P6:Oxidation or Hydroxylation:0.00;P10:Oxidation or Hydroxylation:14.84
2	20-H/SDS-P	SDS	20 mL/g	Solubilization	Preciptiation	1	2	4	Collagen I, alpha 1	Collagen alpha-1(I) chain OS=Gallus gallus GN=COL1A1 PE=1 SV=3	P02457|CO1A1_CHICK	R.DGAAGPKGDRGETGPAGP(+15.99)PGAP(+15.99)GAPGAP(+15.99)GPVGPAGK.N	Y	17.15	3092.49	36	1.2	774.131	4	14.36		F11:124	1	1016	1051	Oxidation or Hydroxylation	P18:Oxidation or Hydroxylation:0.00;P22:Oxidation or Hydroxylation:28.36;P28:Oxidation or Hydroxylation:14.04
2	20-H/SDS-P	SDS	20 mL/g	Solubilization	Preciptiation	1	2	4	Collagen I, alpha 1	Collagen alpha-1(I) chain OS=Gallus gallus GN=COL1A1 PE=1 SV=3	P02457|CO1A1_CHICK	R.GAP(+15.99)GPP(+15.99)GAVGAAGKDGEAGAQGPP(+15.99)GPTGPAGER.G	Y	45.23	2855.34	33	1.1	952.789	3	14.76		F11:131	2	588	620	Oxidation or Hydroxylation	P3:Oxidation or Hydroxylation:32.28;P6:Oxidation or Hydroxylation:17.01;P24:Oxidation or Hydroxylation:91.48
2	20-H/SDS-P	SDS	20 mL/g	Solubilization	Preciptiation	1	2	4	Collagen I, alpha 1	Collagen alpha-1(I) chain OS=Gallus gallus GN=COL1A1 PE=1 SV=3	P02457|CO1A1_CHICK	K.GDRGETGPAGP(+15.99)PGAPGAP(+15.99)GAP(+15.99)GPVGPAGK.N	Y	25.56	2496.2	29	1.2	833.075	3	14.79		F11:132	1	1023	1051	Oxidation or Hydroxylation	P11:Oxidation or Hydroxylation:0.00;P18:Oxidation or Hydroxylation:0.00;P21:Oxidation or Hydroxylation:14.04
2	20-H/SDS-P	SDS	20 mL/g	Solubilization	Preciptiation	1	2	4	Collagen I, alpha 1	Collagen alpha-1(I) chain OS=Gallus gallus GN=COL1A1 PE=1 SV=3	P02457|CO1A1_CHICK	K.GEP(+15.99)GPAGVQGPP(+15.99)GPAGEEGK.R	Y	36.45	1818.84	20	1.5	910.428	2	14.88		F11:135	1	438	457	Oxidation or Hydroxylation	P3:Oxidation or Hydroxylation:14.04;P12:Oxidation or Hydroxylation:12.28
2	20-H/SDS-P	SDS	20 mL/g	Solubilization	Preciptiation	1	2	4	Collagen I, alpha 1	Collagen alpha-1(I) chain OS=Gallus gallus GN=COL1A1 PE=1 SV=3	P02457|CO1A1_CHICK	R.GSAGPP(+15.99)GATGFP(+15.99)GAAGR.V	Y	55.26	1458.69	17	0.9	730.351	2	15.76		F11:157	3	855	871	Oxidation or Hydroxylation	P6:Oxidation or Hydroxylation:27.96;P12:Oxidation or Hydroxylation:17.91
2	20-H/SDS-P	SDS	20 mL/g	Solubilization	Preciptiation	1	2	4	Collagen I, alpha 1	Collagen alpha-1(I) chain OS=Gallus gallus GN=COL1A1 PE=1 SV=3	P02457|CO1A1_CHICK	R.GEP(+15.99)GPAGLP(+15.99)GPAGER.G	Y	43.22	1392.66	15	0.4	697.339	2	16.05		F11:166	4	462	476	Oxidation or Hydroxylation	P3:Oxidation or Hydroxylation:17.01;P9:Oxidation or Hydroxylation:17.01
2	20-H/SDS-P	SDS	20 mL/g	Solubilization	Preciptiation	1	2	4	Collagen I, alpha 1	Collagen alpha-1(I) chain OS=Gallus gallus GN=COL1A1 PE=1 SV=3	P02457|CO1A1_CHICK	R.GQAGVM(+15.99)GFP(+15.99)GPK.G	Y	54.37	1176.56	12	0.5	589.287	2	16.74		F11:188	1	564	575	Oxidation (M); Oxidation or Hydroxylation	M6:Oxidation (M):1000.00;P9:Oxidation or Hydroxylation:5.03
2	20-H/SDS-P	SDS	20 mL/g	Solubilization	Preciptiation	1	2	4	Collagen I, alpha 1	Collagen alpha-1(I) chain OS=Gallus gallus GN=COL1A1 PE=1 SV=3	P02457|CO1A1_CHICK	R.GFP(+15.99)GADGIAGPKGPPGER(+15.99).G	Y	57.51	1710.83	18	1.1	856.424	2	17.62		F11:213	1	483	500	Oxidation or Hydroxylation	P3:Oxidation or Hydroxylation:9.34;R18:Oxidation or Hydroxylation:3.64
2	20-H/SDS-P	SDS	20 mL/g	Solubilization	Preciptiation	1	2	4	Collagen I, alpha 1	Collagen alpha-1(I) chain OS=Gallus gallus GN=COL1A1 PE=1 SV=3	P02457|CO1A1_CHICK	K.GSPGAD(+15.99)GPIGAP(+15.99)GTP(+15.99)GPQGIAGQR.G	Y	39.51	2162.04	24	1.3	1082.03	2	17.84		F11:220	2	924	947	Oxidation or Hydroxylation	D6:Oxidation or Hydroxylation:5.08;P12:Oxidation or Hydroxylation:67.69;P15:Oxidation or Hydroxylation:17.01
2	20-H/SDS-P	SDS	20 mL/g	Solubilization	Preciptiation	1	2	4	Collagen I, alpha 1	Collagen alpha-1(I) chain OS=Gallus gallus GN=COL1A1 PE=1 SV=3	P02457|CO1A1_CHICK	R.GLTGPIGPPGPAGAPGD(+21.98)K(+42.01)GEAGPPGPAGPTGAR.G	Y	27.6	2894.43	33	-2.9	965.814	3	18.26		F11:233	1	753	785	Sodium adduct; Acetylation (K)	D17:Sodium adduct:0.00;K18:Acetylation (K):1000.00
2	20-H/SDS-P	SDS	20 mL/g	Solubilization	Preciptiation	1	2	4	Collagen I, alpha 1	Collagen alpha-1(I) chain OS=Gallus gallus GN=COL1A1 PE=1 SV=3	P02457|CO1A1_CHICK	K.GATGAP(+15.99)GIAGAP(+15.99)GFP(+15.99)GAR.G	Y	44.43	1571.77	18	1.4	786.893	2	18.43		F11:238	3	387	404	Oxidation or Hydroxylation	P6:Oxidation or Hydroxylation:98.53;P12:Oxidation or Hydroxylation:20.41;P15:Oxidation or Hydroxylation:0.00
2	20-H/SDS-P	SDS	20 mL/g	Solubilization	Preciptiation	1	2	4	Collagen I, alpha 1	Collagen alpha-1(I) chain OS=Gallus gallus GN=COL1A1 PE=1 SV=3	P02457|CO1A1_CHICK	R.GLTGPIGPP(+15.99)GPAGAP(+15.99)GDKGEAGPP(+15.99)GPAGPTGAR.G	Y	59.93	2878.42	33	1.6	960.482	3	18.45		F11:239	4	753	785	Oxidation or Hydroxylation	P9:Oxidation or Hydroxylation:42.89;P15:Oxidation or Hydroxylation:51.59;P24:Oxidation or Hydroxylation:56.47
2	20-H/SDS-P	SDS	20 mL/g	Solubilization	Preciptiation	1	2	4	Collagen I, alpha 1	Collagen alpha-1(I) chain OS=Gallus gallus GN=COL1A1 PE=1 SV=3	P02457|CO1A1_CHICK	R.GPP(+15.99)GPMGPP(+15.99)GLAGP(+15.99)PGEAGR.E	Y	45.5	1815.86	20	1.5	908.937	2	18.56		F11:242	1	984	1003	Oxidation or Hydroxylation	P3:Oxidation or Hydroxylation:12.28;P9:Oxidation or Hydroxylation:12.28;P14:Oxidation or Hydroxylation:0.00
2	20-H/SDS-P	SDS	20 mL/g	Solubilization	Preciptiation	1	2	4	Collagen I, alpha 1	Collagen alpha-1(I) chain OS=Gallus gallus GN=COL1A1 PE=1 SV=3	P02457|CO1A1_CHICK	R.GPP(+15.99)GPMGPP(+15.99)GLAGPPGEAGR(+15.99).E	Y	44.69	1815.86	20	1.5	908.937	2	18.88		F11:253	1	984	1003	Oxidation or Hydroxylation	P3:Oxidation or Hydroxylation:17.01;P9:Oxidation or Hydroxylation:30.46;R20:Oxidation or Hydroxylation:0.00
2	20-H/SDS-P	SDS	20 mL/g	Solubilization	Preciptiation	1	2	4	Collagen I, alpha 1	Collagen alpha-1(I) chain OS=Gallus gallus GN=COL1A1 PE=1 SV=3	P02457|CO1A1_CHICK	R.GFP(+15.99)GADGIAGPK.G	Y	49.22	1101.55	12	0.9	551.78	2	19.03		F11:257	4	483	494	Oxidation or Hydroxylation	P3:Oxidation or Hydroxylation:11.06
2	20-H/SDS-P	SDS	20 mL/g	Solubilization	Preciptiation	1	2	4	Collagen I, alpha 1	Collagen alpha-1(I) chain OS=Gallus gallus GN=COL1A1 PE=1 SV=3	P02457|CO1A1_CHICK	R.GFP(+15.99)GLP(+15.99)GPSGEPGK(+15.99).Q	Y	34.93	1343.64	14	1.3	672.826	2	19.95		F11:286	2	960	973	Oxidation or Hydroxylation	P3:Oxidation or Hydroxylation:17.01;P6:Oxidation or Hydroxylation:14.04;K14:Oxidation or Hydroxylation:0.00
2	20-H/SDS-P	SDS	20 mL/g	Solubilization	Preciptiation	1	2	4	Collagen I, alpha 1	Collagen alpha-1(I) chain OS=Gallus gallus GN=COL1A1 PE=1 SV=3	P02457|CO1A1_CHICK	R.GFSGLQGPPGP(+15.99)P(+15.99)GAP(+15.99)GEQGPSGASGPAGPR.G	Y	13.15	2688.25	30	1.9	897.093	3	20.24		F11:295	1	1101	1130	Oxidation or Hydroxylation	P11:Oxidation or Hydroxylation:9.42;P12:Oxidation or Hydroxylation:12.42;P15:Oxidation or Hydroxylation:23.70
2	20-H/SDS-P	SDS	20 mL/g	Solubilization	Preciptiation	1	2	4	Collagen I, alpha 1	Collagen alpha-1(I) chain OS=Gallus gallus GN=COL1A1 PE=1 SV=3	P02457|CO1A1_CHICK	R.GFP(+15.99)GLP(+15.99)GPSGEPGK.Q	Y	29.36	1327.64	14	0.8	664.828	2	20.66		F11:308	4	960	973	Oxidation or Hydroxylation	P3:Oxidation or Hydroxylation:17.01;P6:Oxidation or Hydroxylation:14.04
2	20-H/SDS-P	SDS	20 mL/g	Solubilization	Preciptiation	1	2	4	Collagen I, alpha 1	Collagen alpha-1(I) chain OS=Gallus gallus GN=COL1A1 PE=1 SV=3	P02457|CO1A1_CHICK	R.GQAGVMGFPGPK(+15.99).G	Y	47.58	1160.56	12	0.7	581.29	2	20.92		F11:316	2	564	575	Oxidation or Hydroxylation	K12:Oxidation or Hydroxylation:0.00
2	20-H/SDS-P	SDS	20 mL/g	Solubilization	Preciptiation	1	2	4	Collagen I, alpha 1	Collagen alpha-1(I) chain OS=Gallus gallus GN=COL1A1 PE=1 SV=3	P02457|CO1A1_CHICK	R.GQAGVMGFP(+15.99)GPK.G	Y	41.13	1160.56	12	0.7	581.29	2	21.04		F11:320	1	564	575	Oxidation or Hydroxylation	P9:Oxidation or Hydroxylation:0.00
2	20-H/SDS-P	SDS	20 mL/g	Solubilization	Preciptiation	1	2	4	Collagen I, alpha 1	Collagen alpha-1(I) chain OS=Gallus gallus GN=COL1A1 PE=1 SV=3	P02457|CO1A1_CHICK	K.DGLNGLP(+15.99)GPIGPP(+15.99)GP(+15.99)R.G	Y	27.61	1560.79	16	0.8	781.403	2	21.31		F11:328	1	1142	1157	Oxidation or Hydroxylation	P7:Oxidation or Hydroxylation:26.31;P13:Oxidation or Hydroxylation:0.00;P15:Oxidation or Hydroxylation:0.00
2	20-H/SDS-P	SDS	20 mL/g	Solubilization	Preciptiation	1	2	4	Collagen I, alpha 1	Collagen alpha-1(I) chain OS=Gallus gallus GN=COL1A1 PE=1 SV=3	P02457|CO1A1_CHICK	K.DGLNGLP(+15.99)GPIGPP(+15.99)GPR(+15.99).G	Y	16.08	1560.79	16	0.8	781.403	2	21.59		F11:337	1	1142	1157	Oxidation or Hydroxylation	P7:Oxidation or Hydroxylation:16.36;P13:Oxidation or Hydroxylation:0.00;R16:Oxidation or Hydroxylation:0.00
2	20-H/SDS-P	SDS	20 mL/g	Solubilization	Preciptiation	1	2	4	Collagen I, alpha 1	Collagen alpha-1(I) chain OS=Gallus gallus GN=COL1A1 PE=1 SV=3	P02457|CO1A1_CHICK	K.SGEYWIDPNQGC(+57.02)NLDAIK.V	Y	34.61	2078.94	18	1.3	1040.48	2	27.53		F11:509	2	1260	1277	Carbamidomethylation	C12:Carbamidomethylation:1000.00
2	20-H/SDS-P	SDS	20 mL/g	Solubilization	Preciptiation	1	2	4	Collagen I, alpha 1	Collagen alpha-1(I) chain OS=Gallus gallus GN=COL1A1 PE=1 SV=3	P02457|CO1A1_CHICK	R.LPIIDLAPM.D	Y	15	981.557	9	1.9	982.566	1	37.14		F11:718	1	1426	1434
2	20-H/SDS-P	SDS	20 mL/g	Solubilization	Preciptiation	2	2	4	Collagen I, alpha 1	Collagen alpha-1(I) chain OS=Gallus gallus GN=COL1A1 PE=1 SV=3	P02457|CO1A1_CHICK	L.QGP(+15.99)PGPP(+15.99)GAP(+15.99)GEQGPSGASGPAGPR.G	Y	33.93	2227.03	25	1	743.35	3	13.87		F12:117	2	1106	1130	Oxidation or Hydroxylation	P3:Oxidation or Hydroxylation:0.00;P7:Oxidation or Hydroxylation:30.46;P10:Oxidation or Hydroxylation:61.26
2	20-H/SDS-P	SDS	20 mL/g	Solubilization	Preciptiation	2	2	4	Collagen I, alpha 1	Collagen alpha-1(I) chain OS=Gallus gallus GN=COL1A1 PE=1 SV=3	P02457|CO1A1_CHICK	K.GDRGETGPAGP(+15.99)PGAP(+15.99)GAPGAP(+15.99)GPVGPAGK.N	Y	28.97	2496.2	29	1.1	833.075	3	14.5		F12:131	1	1023	1051	Oxidation or Hydroxylation	P11:Oxidation or Hydroxylation:0.00;P15:Oxidation or Hydroxylation:28.36;P21:Oxidation or Hydroxylation:14.04
2	20-H/SDS-P	SDS	20 mL/g	Solubilization	Preciptiation	2	2	4	Collagen I, alpha 1	Collagen alpha-1(I) chain OS=Gallus gallus GN=COL1A1 PE=1 SV=3	P02457|CO1A1_CHICK	R.GAP(+15.99)GPP(+15.99)GAVGAAGKDGEAGAQGPPGPTGPAGER.G	Y	34.15	2839.35	33	1.5	947.458	3	15.18		F12:148	2	588	620	Oxidation or Hydroxylation	P3:Oxidation or Hydroxylation:22.85;P6:Oxidation or Hydroxylation:14.02
2	20-H/SDS-P	SDS	20 mL/g	Solubilization	Preciptiation	2	2	4	Collagen I, alpha 1	Collagen alpha-1(I) chain OS=Gallus gallus GN=COL1A1 PE=1 SV=3	P02457|CO1A1_CHICK	R.GFP(+15.99)GADGIAGPKGPP(+15.99)GER.G	Y	41.99	1710.83	18	1.1	856.424	2	17.47		F12:211	1	483	500	Oxidation or Hydroxylation	P3:Oxidation or Hydroxylation:14.02;P15:Oxidation or Hydroxylation:0.00
2	20-H/SDS-P	SDS	20 mL/g	Solubilization	Preciptiation	2	2	4	Collagen I, alpha 1	Collagen alpha-1(I) chain OS=Gallus gallus GN=COL1A1 PE=1 SV=3	P02457|CO1A1_CHICK	K.GSP(+15.99)GADGPIGAP(+15.99)GTP(+15.99)GPQGIAGQR.G	Y	31.01	2162.04	24	1.5	1082.03	2	17.71		F12:219	2	924	947	Oxidation or Hydroxylation	P3:Oxidation or Hydroxylation:0.00;P12:Oxidation or Hydroxylation:23.70;P15:Oxidation or Hydroxylation:6.59
2	20-H/SDS-P	SDS	20 mL/g	Solubilization	Preciptiation	2	2	4	Collagen I, alpha 1	Collagen alpha-1(I) chain OS=Gallus gallus GN=COL1A1 PE=1 SV=3	P02457|CO1A1_CHICK	K.GATGAP(+15.99)GIAGAP(+15.99)GFPGAR(+15.99).G	Y	42.3	1571.77	18	1.4	786.893	2	18.55		F12:246	1	387	404	Oxidation or Hydroxylation	P6:Oxidation or Hydroxylation:89.48;P12:Oxidation or Hydroxylation:20.41;R18:Oxidation or Hydroxylation:0.00
2	20-H/SDS-P	SDS	20 mL/g	Solubilization	Preciptiation	2	2	4	Collagen I, alpha 1	Collagen alpha-1(I) chain OS=Gallus gallus GN=COL1A1 PE=1 SV=3	P02457|CO1A1_CHICK	R.GPP(+15.99)GPMGPP(+15.99)GLAGPP(+15.99)GEAGR.E	Y	48.86	1815.86	20	1.5	908.937	2	18.67		F12:250	1	984	1003	Oxidation or Hydroxylation	P3:Oxidation or Hydroxylation:12.28;P9:Oxidation or Hydroxylation:27.96;P15:Oxidation or Hydroxylation:12.28
2	20-H/SDS-P	SDS	20 mL/g	Solubilization	Preciptiation	2	2	4	Collagen I, alpha 1	Collagen alpha-1(I) chain OS=Gallus gallus GN=COL1A1 PE=1 SV=3	P02457|CO1A1_CHICK	R.GLTGPIGP(+15.99)PGPAGAP(+15.99)GDKGEAGPP(+15.99)GPAGPTGAR.G	Y	32.69	2878.42	33	2.2	960.483	3	18.91		F12:258	1	753	785	Oxidation or Hydroxylation	P8:Oxidation or Hydroxylation:0.00;P15:Oxidation or Hydroxylation:0.00;P24:Oxidation or Hydroxylation:11.06
2	20-H/SDS-P	SDS	20 mL/g	Solubilization	Preciptiation	2	2	4	Collagen I, alpha 1	Collagen alpha-1(I) chain OS=Gallus gallus GN=COL1A1 PE=1 SV=3	P02457|CO1A1_CHICK	R.GFP(+15.99)GLP(+15.99)GPSGEP(+15.99)GK.Q	Y	26.19	1343.64	14	1	672.826	2	19.98		F12:293	2	960	973	Oxidation or Hydroxylation	P3:Oxidation or Hydroxylation:14.02;P6:Oxidation or Hydroxylation:32.28;P12:Oxidation or Hydroxylation:5.99
2	20-H/SDS-P	SDS	20 mL/g	Solubilization	Preciptiation	2	2	4	Collagen I, alpha 1	Collagen alpha-1(I) chain OS=Gallus gallus GN=COL1A1 PE=1 SV=3	P02457|CO1A1_CHICK	R.GFSGLQGPP(+15.99)GPP(+15.99)GAP(+15.99)GEQGPSGASGPAGPR.G	Y	46.85	2688.25	30	2.1	1345.14	2	20.01		F12:294	5	1101	1130	Oxidation or Hydroxylation	P9:Oxidation or Hydroxylation:17.01;P12:Oxidation or Hydroxylation:61.69;P15:Oxidation or Hydroxylation:42.89
2	20-H/SDS-P	SDS	20 mL/g	Solubilization	Preciptiation	2	2	4	Collagen I, alpha 1	Collagen alpha-1(I) chain OS=Gallus gallus GN=COL1A1 PE=1 SV=3	P02457|CO1A1_CHICK	R.GFSGLQGP(+15.99)PGPPGAP(+15.99)GEQGPSGASGPAGPR.G	Y	28.14	2672.26	30	1.4	891.761	3	20.67		F12:315	1	1101	1130	Oxidation or Hydroxylation	P8:Oxidation or Hydroxylation:0.00;P15:Oxidation or Hydroxylation:28.36
2	20-H/SDS-P	SDS	20 mL/g	Solubilization	Preciptiation	2	2	4	Collagen I, alpha 1	Collagen alpha-1(I) chain OS=Gallus gallus GN=COL1A1 PE=1 SV=3	P02457|CO1A1_CHICK	K.DGLNGLP(+15.99)GPIGP(+15.99)PGPR(+15.99).G	Y	32.53	1560.79	16	0.5	781.402	2	21.18		F12:330	1	1142	1157	Oxidation or Hydroxylation	P7:Oxidation or Hydroxylation:26.31;P12:Oxidation or Hydroxylation:0.00;R16:Oxidation or Hydroxylation:0.00
2	20-H/SDS-P	SDS	20 mL/g	Solubilization	Preciptiation	2	2	4	Collagen I, alpha 1	Collagen alpha-1(I) chain OS=Gallus gallus GN=COL1A1 PE=1 SV=3	P02457|CO1A1_CHICK	K.ALLLQGANEIEIR.A	Y	45.61	1438.81	13	1.3	720.415	2	28.13		F12:525	3	1376	1388
2	20-H/SDS-P	SDS	20 mL/g	Solubilization	Preciptiation	1	1	1	Collagen I, alpha 2	Collagen alpha-2(I) chain OS=Gallus gallus GN=COL1A2 PE=4 SV=1	tr|F1P0H9|F1P0H9_CHICK	R.GAP(+15.99)GNPGPSGALGAPGP(+15.99)HGQVGPSGKP(+15.99)GNR.G	Y	21.17	2692.31	30	0.9	674.085	4	13.97		F11:112	1	948	977	Oxidation or Hydroxylation	P3:Oxidation or Hydroxylation:14.04;P17:Oxidation or Hydroxylation:0.00;P27:Oxidation or Hydroxylation:0.00
2	20-H/SDS-P	SDS	20 mL/g	Solubilization	Preciptiation	1	1	1	Collagen I, alpha 2	Collagen alpha-2(I) chain OS=Gallus gallus GN=COL1A2 PE=4 SV=1	tr|F1P0H9|F1P0H9_CHICK	R.GAP(+15.99)GNPGPSGALGAP(+15.99)GPHGQVGPSGKPGN(+15.99)R.G	Y	41.77	2692.31	30	1.4	898.444	3	14		F11:113	1	948	977	Oxidation or Hydroxylation	P3:Oxidation or Hydroxylation:22.85;P15:Oxidation or Hydroxylation:0.00;N29:Oxidation or Hydroxylation:0.00
2	20-H/SDS-P	SDS	20 mL/g	Solubilization	Preciptiation	1	1	1	Collagen I, alpha 2	Collagen alpha-2(I) chain OS=Gallus gallus GN=COL1A2 PE=4 SV=1	tr|F1P0H9|F1P0H9_CHICK	R.GAP(+15.99)GNPGPSGALGAPGP(+15.99)HGQVGPSGKPGN(+15.99)R.G	Y	21.02	2692.31	30	0.8	674.084	4	14.31		F11:122	1	948	977	Oxidation or Hydroxylation	P3:Oxidation or Hydroxylation:14.04;P17:Oxidation or Hydroxylation:4.64;N29:Oxidation or Hydroxylation:0.00
2	20-H/SDS-P	SDS	20 mL/g	Solubilization	Preciptiation	1	1	1	Collagen I, alpha 2	Collagen alpha-2(I) chain OS=Gallus gallus GN=COL1A2 PE=4 SV=1	tr|F1P0H9|F1P0H9_CHICK	R.GIP(+15.99)GERGEP(+15.99)GPVGPS.G	Y	18.1	1436.69	15	0.7	719.352	2	15.43		F11:148	1	708	722	Oxidation or Hydroxylation	P3:Oxidation or Hydroxylation:0.00;P9:Oxidation or Hydroxylation:26.31
2	20-H/SDS-P	SDS	20 mL/g	Solubilization	Preciptiation	1	1	1	Collagen I, alpha 2	Collagen alpha-2(I) chain OS=Gallus gallus GN=COL1A2 PE=4 SV=1	tr|F1P0H9|F1P0H9_CHICK	R.GDAGPP(+15.99)GM(+15.99)TGFP(+15.99)GAAGR.V	Y	45.44	1562.68	17	1.1	782.347	2	15.53		F11:151	1	777	793	Oxidation or Hydroxylation; Oxidation (M)	P6:Oxidation or Hydroxylation:12.28;M8:Oxidation (M):1000.00;P12:Oxidation or Hydroxylation:30.46
2	20-H/SDS-P	SDS	20 mL/g	Solubilization	Preciptiation	1	1	1	Collagen I, alpha 2	Collagen alpha-2(I) chain OS=Gallus gallus GN=COL1A2 PE=4 SV=1	tr|F1P0H9|F1P0H9_CHICK	R.M(sub V)GPPGPAGITGPP(+15.99)GP(+15.99)PGPAGK.D	Y	12.81	1840.91	21	10.4	614.652	3	17.02		F11:196	1	794	814	Oxidation or Hydroxylation; Mutation	P13:Oxidation or Hydroxylation:14.02;P15:Oxidation or Hydroxylation:0.00
2	20-H/SDS-P	SDS	20 mL/g	Solubilization	Preciptiation	1	1	1	Collagen I, alpha 2	Collagen alpha-2(I) chain OS=Gallus gallus GN=COL1A2 PE=4 SV=1	tr|F1P0H9|F1P0H9_CHICK	R.GLP(+15.99)GAIGAP(+15.99)GPAGGAGDR.G	Y	19	1521.75	18	0.8	761.885	2	17.08		F11:198	1	675	692	Oxidation or Hydroxylation	P3:Oxidation or Hydroxylation:78.75;P9:Oxidation or Hydroxylation:0.00
2	20-H/SDS-P	SDS	20 mL/g	Solubilization	Preciptiation	1	1	1	Collagen I, alpha 2	Collagen alpha-2(I) chain OS=Gallus gallus GN=COL1A2 PE=4 SV=1	tr|F1P0H9|F1P0H9_CHICK	R.GLP(+15.99)GAIGAP(+15.99)GPAGGAGDRGEGGPAGPAGPAGAR.G	Y	38.81	2724.33	33	1.2	909.119	3	17.3		F11:203	4	675	707	Oxidation or Hydroxylation	P3:Oxidation or Hydroxylation:99.62;P9:Oxidation or Hydroxylation:22.85
2	20-H/SDS-P	SDS	20 mL/g	Solubilization	Preciptiation	1	1	1	Collagen I, alpha 2	Collagen alpha-2(I) chain OS=Gallus gallus GN=COL1A2 PE=4 SV=1	tr|F1P0H9|F1P0H9_CHICK	R.GLHGEFGVP(+15.99)GPAGPRGER.G	Y	40.26	1804.9	18	0.7	602.64	3	17.46		F11:208	1	573	590	Oxidation or Hydroxylation	P9:Oxidation or Hydroxylation:9.40
2	20-H/SDS-P	SDS	20 mL/g	Solubilization	Preciptiation	1	1	1	Collagen I, alpha 2	Collagen alpha-2(I) chain OS=Gallus gallus GN=COL1A2 PE=4 SV=1	tr|F1P0H9|F1P0H9_CHICK	T.GEP(+15.99)GPLGVSGPP(+15.99)GAR.G	Y	36.46	1378.68	15	0.5	690.35	2	17.7		F11:216	2	891	905	Oxidation or Hydroxylation	P3:Oxidation or Hydroxylation:11.10;P12:Oxidation or Hydroxylation:0.00
2	20-H/SDS-P	SDS	20 mL/g	Solubilization	Preciptiation	1	1	1	Collagen I, alpha 2	Collagen alpha-2(I) chain OS=Gallus gallus GN=COL1A2 PE=4 SV=1	tr|F1P0H9|F1P0H9_CHICK	K.EGPVGFP(+15.99)GADGR.V	Y	43.11	1173.54	12	0.6	587.778	2	18.15		F11:229	3	464	475	Oxidation or Hydroxylation	P7:Oxidation or Hydroxylation:8.69
2	20-H/SDS-P	SDS	20 mL/g	Solubilization	Preciptiation	1	1	1	Collagen I, alpha 2	Collagen alpha-2(I) chain OS=Gallus gallus GN=COL1A2 PE=4 SV=1	tr|F1P0H9|F1P0H9_CHICK	R.GLHGEFGVP(+15.99)GPAGPR.G	Y	52.2	1462.73	15	1.2	732.374	2	18.75		F11:248	6	573	587	Oxidation or Hydroxylation	P9:Oxidation or Hydroxylation:22.85
2	20-H/SDS-P	SDS	20 mL/g	Solubilization	Preciptiation	1	1	1	Collagen I, alpha 2	Collagen alpha-2(I) chain OS=Gallus gallus GN=COL1A2 PE=4 SV=1	tr|F1P0H9|F1P0H9_CHICK	R.TGEQGIAGPP(+15.99)GFAGEK.G	Y	42.63	1530.73	16	1.2	766.374	2	18.85		F11:252	2	830	845	Oxidation or Hydroxylation	P10:Oxidation or Hydroxylation:6.59
2	20-H/SDS-P	SDS	20 mL/g	Solubilization	Preciptiation	1	1	1	Collagen I, alpha 2	Collagen alpha-2(I) chain OS=Gallus gallus GN=COL1A2 PE=4 SV=1	tr|F1P0H9|F1P0H9_CHICK	R.GLHGEFGVPGPAGP(+15.99)R.G	Y	38.59	1462.73	15	1.2	732.374	2	19.08		F11:259	1	573	587	Oxidation or Hydroxylation	P14:Oxidation or Hydroxylation:0.00
2	20-H/SDS-P	SDS	20 mL/g	Solubilization	Preciptiation	1	1	1	Collagen I, alpha 2	Collagen alpha-2(I) chain OS=Gallus gallus GN=COL1A2 PE=4 SV=1	tr|F1P0H9|F1P0H9_CHICK	R.GLP(+15.99)GESGAVGPAGPIGSR.G	Y	54.78	1593.81	18	0.2	797.913	2	19.17		F11:262	4	591	608	Oxidation or Hydroxylation	P3:Oxidation or Hydroxylation:132.11
2	20-H/SDS-P	SDS	20 mL/g	Solubilization	Preciptiation	1	1	1	Collagen I, alpha 2	Collagen alpha-2(I) chain OS=Gallus gallus GN=COL1A2 PE=4 SV=1	tr|F1P0H9|F1P0H9_CHICK	R.NGLP(+15.99)GPIGPAGVR.G	Y	36.19	1219.67	13	1.1	610.842	2	20.17		F11:292	4	1067	1079	Oxidation or Hydroxylation	P4:Oxidation or Hydroxylation:20.41
2	20-H/SDS-P	SDS	20 mL/g	Solubilization	Preciptiation	1	1	1	Collagen I, alpha 2	Collagen alpha-2(I) chain OS=Gallus gallus GN=COL1A2 PE=4 SV=1	tr|F1P0H9|F1P0H9_CHICK	K.GAAGLP(+15.99)GVAGAP(+15.99)GLPGPR(+15.99).G	Y	41.72	1561.82	18	1.4	781.919	2	20.32		F11:297	2	309	326	Oxidation or Hydroxylation	P6:Oxidation or Hydroxylation:106.84;P12:Oxidation or Hydroxylation:40.63;R18:Oxidation or Hydroxylation:0.00
2	20-H/SDS-P	SDS	20 mL/g	Solubilization	Preciptiation	1	1	1	Collagen I, alpha 2	Collagen alpha-2(I) chain OS=Gallus gallus GN=COL1A2 PE=4 SV=1	tr|F1P0H9|F1P0H9_CHICK	R.VGPIGPAGNRGEP(+15.99)GNIGFPGP(+15.99)K.G	Y	36.24	2119.08	22	1	707.368	3	20.46		F11:301	2	476	497	Oxidation or Hydroxylation	P13:Oxidation or Hydroxylation:7.32;P21:Oxidation or Hydroxylation:0.00
2	20-H/SDS-P	SDS	20 mL/g	Solubilization	Preciptiation	1	1	1	Collagen I, alpha 2	Collagen alpha-2(I) chain OS=Gallus gallus GN=COL1A2 PE=4 SV=1	tr|F1P0H9|F1P0H9_CHICK	K.GP(+15.99)KGETGPTGAIGPIGASGPP(+15.99)GPVGAAGPAGPR.G	Y	48.88	2836.45	33	1.4	946.491	3	20.58		F11:305	1	744	776	Oxidation or Hydroxylation	P2:Oxidation or Hydroxylation:0.00;P21:Oxidation or Hydroxylation:63.64
2	20-H/SDS-P	SDS	20 mL/g	Solubilization	Preciptiation	1	1	1	Collagen I, alpha 2	Collagen alpha-2(I) chain OS=Gallus gallus GN=COL1A2 PE=4 SV=1	tr|F1P0H9|F1P0H9_CHICK	K.GPKGETGPTGAIGPIGASGPP(+15.99)GPVGAAGPAGPR.G	Y	49.16	2820.45	33	0.9	941.159	3	20.75		F11:311	3	744	776	Oxidation or Hydroxylation	P21:Oxidation or Hydroxylation:49.96
2	20-H/SDS-P	SDS	20 mL/g	Solubilization	Preciptiation	1	1	1	Collagen I, alpha 2	Collagen alpha-2(I) chain OS=Gallus gallus GN=COL1A2 PE=4 SV=1	tr|F1P0H9|F1P0H9_CHICK	R.N(+.98)GLP(+15.99)GPIGPAGVR.G	Y	45.23	1220.65	13	0.7	611.333	2	21.9		F11:346	2	1067	1079	Deamidation (NQ); Oxidation or Hydroxylation	N1:Deamidation (NQ):1000.00;P4:Oxidation or Hydroxylation:52.04
2	20-H/SDS-P	SDS	20 mL/g	Solubilization	Preciptiation	1	1	1	Collagen I, alpha 2	Collagen alpha-2(I) chain OS=Gallus gallus GN=COL1A2 PE=4 SV=1	tr|F1P0H9|F1P0H9_CHICK	K.GETGPTGAIGPIGASGPP(+15.99)GPVGAAGPAGPR.G	Y	52.8	2538.28	30	0.7	1270.15	2	22.66		F11:371	4	747	776	Oxidation or Hydroxylation	P18:Oxidation or Hydroxylation:41.33
2	20-H/SDS-P	SDS	20 mL/g	Solubilization	Preciptiation	1	1	1	Collagen I, alpha 2	Collagen alpha-2(I) chain OS=Gallus gallus GN=COL1A2 PE=4 SV=1	tr|F1P0H9|F1P0H9_CHICK	R.GDP(+15.99)GPVGPVGPAGAFGPR.G	Y	54.85	1619.81	18	0.7	810.911	2	23.37		F11:391	4	978	995	Oxidation or Hydroxylation	P3:Oxidation or Hydroxylation:17.01
2	20-H/SDS-P	SDS	20 mL/g	Solubilization	Preciptiation	1	1	1	Collagen I, alpha 2	Collagen alpha-2(I) chain OS=Gallus gallus GN=COL1A2 PE=4 SV=1	tr|F1P0H9|F1P0H9_CHICK	R.GDPGPVGPVGPAGAFGPR.G	Y	57.5	1603.81	18	1.2	802.913	2	23.67		F11:400	5	978	995
2	20-H/SDS-P	SDS	20 mL/g	Solubilization	Preciptiation	1	1	1	Collagen I, alpha 2	Collagen alpha-2(I) chain OS=Gallus gallus GN=COL1A2 PE=4 SV=1	tr|F1P0H9|F1P0H9_CHICK	R.GFP(+15.99)GTP(+15.99)GLPGFK(+15.99).G	Y	42	1221.6	12	0.7	611.809	2	23.7		F11:401	1	165	176	Oxidation or Hydroxylation	P3:Oxidation or Hydroxylation:17.01;P6:Oxidation or Hydroxylation:49.37;K12:Oxidation or Hydroxylation:0.00
2	20-H/SDS-P	SDS	20 mL/g	Solubilization	Preciptiation	1	1	1	Collagen I, alpha 2	Collagen alpha-2(I) chain OS=Gallus gallus GN=COL1A2 PE=4 SV=1	tr|F1P0H9|F1P0H9_CHICK	R.GFP(+15.99)GTP(+15.99)GLP(+15.99)GFK.G	Y	41.61	1221.6	12	0.6	611.809	2	24		F11:411	2	165	176	Oxidation or Hydroxylation	P3:Oxidation or Hydroxylation:17.01;P6:Oxidation or Hydroxylation:30.64;P9:Oxidation or Hydroxylation:0.00
2	20-H/SDS-P	SDS	20 mL/g	Solubilization	Preciptiation	1	1	1	Collagen I, alpha 2	Collagen alpha-2(I) chain OS=Gallus gallus GN=COL1A2 PE=4 SV=1	tr|F1P0H9|F1P0H9_CHICK	R.GLP(+15.99)GIAGATGEP(+15.99)GPLGVSGPPGAR(+15.99).G	Y	45.75	2132.09	24	1.2	1067.05	2	24.2		F11:418	5	882	905	Oxidation or Hydroxylation	P3:Oxidation or Hydroxylation:134.40;P12:Oxidation or Hydroxylation:17.01;R24:Oxidation or Hydroxylation:4.08
2	20-H/SDS-P	SDS	20 mL/g	Solubilization	Preciptiation	1	1	1	Collagen I, alpha 2	Collagen alpha-2(I) chain OS=Gallus gallus GN=COL1A2 PE=4 SV=1	tr|F1P0H9|F1P0H9_CHICK	K.AADFGPGPMGLM(+15.99)GPR.G	Y	44.06	1488.69	15	0.7	745.351	2	24.52		F11:428	2	84	98	Oxidation (M)	M12:Oxidation (M):0.00
2	20-H/SDS-P	SDS	20 mL/g	Solubilization	Preciptiation	1	1	1	Collagen I, alpha 2	Collagen alpha-2(I) chain OS=Gallus gallus GN=COL1A2 PE=4 SV=1	tr|F1P0H9|F1P0H9_CHICK	K.TLNNQIETLLTPEGSK.K	Y	42.29	1756.92	16	4.4	879.471	2	29.87		F11:567	1	1136	1151
2	20-H/SDS-P	SDS	20 mL/g	Solubilization	Preciptiation	1	1	1	Collagen I, alpha 2	Collagen alpha-2(I) chain OS=Gallus gallus GN=COL1A2 PE=4 SV=1	tr|F1P0H9|F1P0H9_CHICK	R.TNKPSRLPILDIAPLDIGGADQEFGLHIGPVC(+57.02)FK	Y	56.96	3687.94	34	1.8	922.995	4	37.22		F11:720	8	1330	1363	Carbamidomethylation	C32:Carbamidomethylation:1000.00
2	20-H/SDS-P	SDS	20 mL/g	Solubilization	Preciptiation	2	1	1	Collagen I, alpha 2	Collagen alpha-2(I) chain OS=Gallus gallus GN=COL1A2 PE=4 SV=1	tr|F1P0H9|F1P0H9_CHICK	R.GAP(+15.99)GNPGPSGALGAP(+31.99)GPHGQVGPSGKPGNR.G	Y	23.37	2692.31	30	0.7	674.084	4	13.72		F12:112	1	948	977	Oxidation or Hydroxylation; Dihydroxy	P3:Oxidation or Hydroxylation:14.04;P15:Dihydroxy:0.00
2	20-H/SDS-P	SDS	20 mL/g	Solubilization	Preciptiation	2	1	1	Collagen I, alpha 2	Collagen alpha-2(I) chain OS=Gallus gallus GN=COL1A2 PE=4 SV=1	tr|F1P0H9|F1P0H9_CHICK	R.GAP(+15.99)GNPGPSGALGAP(+15.99)GPHGQVGPSGKP(+15.99)GNR.G	Y	36.04	2692.31	30	1.3	898.444	3	13.84		F12:116	1	948	977	Oxidation or Hydroxylation	P3:Oxidation or Hydroxylation:26.31;P15:Oxidation or Hydroxylation:36.20;P27:Oxidation or Hydroxylation:44.14
2	20-H/SDS-P	SDS	20 mL/g	Solubilization	Preciptiation	2	1	1	Collagen I, alpha 2	Collagen alpha-2(I) chain OS=Gallus gallus GN=COL1A2 PE=4 SV=1	tr|F1P0H9|F1P0H9_CHICK	R.VGP(+15.99)P(+15.99)GPAGITGPP(+15.99)GPP(+15.99)GPAGK.D	Y	22.1	1840.93	21	1.3	921.474	2	17.14		F12:201	3	794	814	Oxidation or Hydroxylation	P3:Oxidation or Hydroxylation:20.70;P4:Oxidation or Hydroxylation:14.63;P13:Oxidation or Hydroxylation:21.94;P16:Oxidation or Hydroxylation:0.00
2	20-H/SDS-P	SDS	20 mL/g	Solubilization	Preciptiation	2	1	1	Collagen I, alpha 2	Collagen alpha-2(I) chain OS=Gallus gallus GN=COL1A2 PE=4 SV=1	tr|F1P0H9|F1P0H9_CHICK	A.GATGEP(+15.99)GPLGVSGPPGAR(+15.99).G	Y	34.54	1607.79	18	1.1	804.903	2	17.49		F12:212	2	888	905	Oxidation or Hydroxylation	P6:Oxidation or Hydroxylation:0.00;R18:Oxidation or Hydroxylation:0.00
2	20-H/SDS-P	SDS	20 mL/g	Solubilization	Preciptiation	2	1	1	Collagen I, alpha 2	Collagen alpha-2(I) chain OS=Gallus gallus GN=COL1A2 PE=4 SV=1	tr|F1P0H9|F1P0H9_CHICK	R.GPP(+15.99)GPSGPPGKDGRN(+.98)GLP(+15.99)GPIGPAGVR.G	Y	35.33	2493.27	27	0.5	624.326	4	17.79		F12:222	2	1053	1079	Oxidation or Hydroxylation; Deamidation (NQ)	P3:Oxidation or Hydroxylation:12.28;N15:Deamidation (NQ):1000.00;P18:Oxidation or Hydroxylation:13.45
2	20-H/SDS-P	SDS	20 mL/g	Solubilization	Preciptiation	2	1	1	Collagen I, alpha 2	Collagen alpha-2(I) chain OS=Gallus gallus GN=COL1A2 PE=4 SV=1	tr|F1P0H9|F1P0H9_CHICK	K.GEIGPAGNVGPTGPAGPR.G	Y	57.36	1602.81	18	1.1	802.414	2	17.91		F12:225	2	264	281
2	20-H/SDS-P	SDS	20 mL/g	Solubilization	Preciptiation	2	1	1	Collagen I, alpha 2	Collagen alpha-2(I) chain OS=Gallus gallus GN=COL1A2 PE=4 SV=1	tr|F1P0H9|F1P0H9_CHICK	R.GDAGPP(+15.99)GMTGFP(+15.99)GAAGR.V	Y	55.84	1546.68	17	0.7	774.35	2	19.39		F12:274	3	777	793	Oxidation or Hydroxylation	P6:Oxidation or Hydroxylation:30.46;P12:Oxidation or Hydroxylation:30.46
2	20-H/SDS-P	SDS	20 mL/g	Solubilization	Preciptiation	2	1	1	Collagen I, alpha 2	Collagen alpha-2(I) chain OS=Gallus gallus GN=COL1A2 PE=4 SV=1	tr|F1P0H9|F1P0H9_CHICK	G.LPGEY(sub S)GAVGPAGPIGSR.G	Y	24.47	1596.83	17	-3	799.418	2	19.5		F12:278	1	592	608	Mutation
2	20-H/SDS-P	SDS	20 mL/g	Solubilization	Preciptiation	2	1	1	Collagen I, alpha 2	Collagen alpha-2(I) chain OS=Gallus gallus GN=COL1A2 PE=4 SV=1	tr|F1P0H9|F1P0H9_CHICK	K.GETGPAGPP(+15.99)GFQGLP(+15.99)GPSGPAGEAGKPGER(+15.99).G	Y	48.32	2776.31	30	1	926.443	3	19.63		F12:282	3	543	572	Oxidation or Hydroxylation	P9:Oxidation or Hydroxylation:42.68;P15:Oxidation or Hydroxylation:26.31;R30:Oxidation or Hydroxylation:17.73
2	20-H/SDS-P	SDS	20 mL/g	Solubilization	Preciptiation	2	1	1	Collagen I, alpha 2	Collagen alpha-2(I) chain OS=Gallus gallus GN=COL1A2 PE=4 SV=1	tr|F1P0H9|F1P0H9_CHICK	R.VGPIGPAGNRGEP(+15.99)GNIGFP(+15.99)GPK.G	Y	36.67	2119.08	22	1	707.368	3	20.04		F12:295	2	476	497	Oxidation or Hydroxylation	P13:Oxidation or Hydroxylation:26.31;P19:Oxidation or Hydroxylation:8.22
2	20-H/SDS-P	SDS	20 mL/g	Solubilization	Preciptiation	2	1	1	Collagen I, alpha 2	Collagen alpha-2(I) chain OS=Gallus gallus GN=COL1A2 PE=4 SV=1	tr|F1P0H9|F1P0H9_CHICK	K.GETGPAGPPGF(+15.99)QGLP(+15.99)GPSGPAGEAGKPGER(+15.99).G	Y	34.78	2776.31	30	1.2	926.443	3	20.06		F12:296	1	543	572	Oxidation or Hydroxylation	F11:Oxidation or Hydroxylation:0.00;P15:Oxidation or Hydroxylation:14.04;R30:Oxidation or Hydroxylation:0.00
2	20-H/SDS-P	SDS	20 mL/g	Solubilization	Preciptiation	2	1	1	Collagen I, alpha 2	Collagen alpha-2(I) chain OS=Gallus gallus GN=COL1A2 PE=4 SV=1	tr|F1P0H9|F1P0H9_CHICK	R.VGPIGPAGNRGEPGN(+15.99)IGFP(+15.99)GPK.G	Y	32.4	2119.08	22	1.4	1060.55	2	20.28		F12:302	2	476	497	Oxidation or Hydroxylation	N15:Oxidation or Hydroxylation:11.10;P19:Oxidation or Hydroxylation:0.00
2	20-H/SDS-P	SDS	20 mL/g	Solubilization	Preciptiation	2	1	1	Collagen I, alpha 2	Collagen alpha-2(I) chain OS=Gallus gallus GN=COL1A2 PE=4 SV=1	tr|F1P0H9|F1P0H9_CHICK	K.GPK(+15.99)GETGPTGAIGPIGASGPP(+15.99)GPVGAAGPAGPR.G	Y	50.83	2836.45	33	1.3	946.491	3	20.5		F12:309	2	744	776	Oxidation or Hydroxylation	K3:Oxidation or Hydroxylation:0.00;P21:Oxidation or Hydroxylation:64.00
2	20-H/SDS-P	SDS	20 mL/g	Solubilization	Preciptiation	2	1	1	Collagen I, alpha 2	Collagen alpha-2(I) chain OS=Gallus gallus GN=COL1A2 PE=4 SV=1	tr|F1P0H9|F1P0H9_CHICK	R.GLPGESGAVGPAGP(+15.99)IGS(-18.01)R.G	Y	23.91	1575.8	18	1.4	788.909	2	20.61		F12:313	1	591	608	Oxidation or Hydroxylation; Dehydration	P14:Oxidation or Hydroxylation:0.00;S17:Dehydration:42.92
2	20-H/SDS-P	SDS	20 mL/g	Solubilization	Preciptiation	2	1	1	Collagen I, alpha 2	Collagen alpha-2(I) chain OS=Gallus gallus GN=COL1A2 PE=4 SV=1	tr|F1P0H9|F1P0H9_CHICK	K.GAAGLP(+15.99)GVAGAP(+15.99)GLPGP(+15.99)R.G	Y	36.78	1561.82	18	1.1	781.919	2	20.79		F12:319	2	309	326	Oxidation or Hydroxylation	P6:Oxidation or Hydroxylation:85.33;P12:Oxidation or Hydroxylation:19.05;P17:Oxidation or Hydroxylation:0.00
2	20-H/SDS-P	SDS	20 mL/g	Solubilization	Preciptiation	2	1	1	Collagen I, alpha 2	Collagen alpha-2(I) chain OS=Gallus gallus GN=COL1A2 PE=4 SV=1	tr|F1P0H9|F1P0H9_CHICK	D.P(+175.04)GPVGPVGPAGAFGPR.G	Y	45.06	1606.8	16	9.5	804.417	2	23.77		F12:411	2	980	995	Naphthalene-2 3-dicarboxaldehyde	P1:Naphthalene-2 3-dicarboxaldehyde:1000.00
2	20-H/SDS-P	SDS	20 mL/g	Solubilization	Preciptiation	2	1	1	Collagen I, alpha 2	Collagen alpha-2(I) chain OS=Gallus gallus GN=COL1A2 PE=4 SV=1	tr|F1P0H9|F1P0H9_CHICK	R.GLP(+15.99)GIAGATGEP(+15.99)GPLGVSGP(+15.99)PGAR.G	Y	42.56	2132.09	24	1.3	1067.05	2	24.26		F12:426	2	882	905	Oxidation or Hydroxylation	P3:Oxidation or Hydroxylation:99.02;P12:Oxidation or Hydroxylation:17.01;P20:Oxidation or Hydroxylation:0.00
2	20-H/SDS-P	SDS	20 mL/g	Solubilization	Preciptiation	2	1	1	Collagen I, alpha 2	Collagen alpha-2(I) chain OS=Gallus gallus GN=COL1A2 PE=4 SV=1	tr|F1P0H9|F1P0H9_CHICK	R.GLP(+15.99)GIAGATGEPGP(+15.99)LGVSGP(+15.99)PGAR.G	Y	21.11	2132.09	24	0.4	711.703	3	24.29		F12:427	1	882	905	Oxidation or Hydroxylation	P3:Oxidation or Hydroxylation:62.82;P14:Oxidation or Hydroxylation:9.40;P20:Oxidation or Hydroxylation:0.00
2	20-H/SDS-P	SDS	20 mL/g	Solubilization	Preciptiation	2	1	1	Collagen I, alpha 2	Collagen alpha-2(I) chain OS=Gallus gallus GN=COL1A2 PE=4 SV=1	tr|F1P0H9|F1P0H9_CHICK	R.AYC(+57.02)DFATGETC(+57.02)IHASLEDIPTK.T	Y	41.45	2498.11	22	1.5	833.712	3	26.29		F12:483	2	1188	1209	Carbamidomethylation	C3:Carbamidomethylation:1000.00;C11:Carbamidomethylation:1000.00
2	20-H/SDS-P	SDS	20 mL/g	Solubilization	Preciptiation	2	1	1	Collagen I, alpha 2	Collagen alpha-2(I) chain OS=Gallus gallus GN=COL1A2 PE=4 SV=1	tr|F1P0H9|F1P0H9_CHICK	K.AADFGPGPMGLMGPR.G	Y	52.17	1472.69	15	1.4	737.354	2	28.45		F12:534	2	84	98
2	20-H/SDS-P	SDS	20 mL/g	Solubilization	Preciptiation	2	1	1	Collagen I, alpha 2	Collagen alpha-2(I) chain OS=Gallus gallus GN=COL1A2 PE=4 SV=1	tr|F1P0H9|F1P0H9_CHICK	K.AADFGPGPM(+15.99)GLM(+15.99)GPR.G	Y	16.25	1504.68	15	1.5	753.348	2	28.7		F12:540	1	84	98	Oxidation (M)	M9:Oxidation (M):1000.00;M12:Oxidation (M):1000.00
2	20-H/SDS-P	SDS	20 mL/g	Solubilization	Preciptiation	2	1	1	Collagen I, alpha 2	Collagen alpha-2(I) chain OS=Gallus gallus GN=COL1A2 PE=4 SV=1	tr|F1P0H9|F1P0H9_CHICK	K.DMATQLAFMR.L	Y	35.88	1182.55	10	0.8	592.284	2	29.05		F12:548	1	1246	1255
2	20-H/SDS-P	SDS	20 mL/g	Solubilization	Preciptiation	2	1	1	Collagen I, alpha 2	Collagen alpha-2(I) chain OS=Gallus gallus GN=COL1A2 PE=4 SV=1	tr|F1P0H9|F1P0H9_CHICK	R.LSHPEWSSGFYWIDPNQGC(+57.02)TADAIR.A	Y	47.76	2906.31	25	1.5	969.778	3	31.33		F12:597	2	1163	1187	Carbamidomethylation	C19:Carbamidomethylation:1000.00
2	20-H/SDS-P	SDS	20 mL/g	Solubilization	Preciptiation	2	28	4101	Collagen III, alpha 1	Collagen alpha-1(III) chain (Fragments) OS=Gallus gallus GN=COL3A1 PE=2 SV=2	P12105|CO3A1_CHICK	R.GNVGPIGPP(+15.99)GPAGPPGDKGETGP(+15.99)AGAPGP(+15.99)AGSR.G	Y	23.27	2893.4	33	5.6	965.478	3	18.17		F12:233	1	761	793	Oxidation or Hydroxylation	P9:Oxidation or Hydroxylation:17.01;P23:Oxidation or Hydroxylation:0.00;P29:Oxidation or Hydroxylation:0.00
2	20-H/SDS-P	SDS	20 mL/g	Solubilization	Preciptiation	2	25	43	Collagen IX, alpha 1	Alpha-1 type XI collagen (Fragment) OS=Gallus gallus PE=2 SV=1	tr|Q90796|Q90796_CHICK	K.FGFEVGPVC(+57.02)FLG	Y	32.07	1327.63	12	0.8	664.821	2	40.29		F12:760	1	877	888	Carbamidomethylation	C9:Carbamidomethylation:1000.00
2	20-H/SDS-P	SDS	20 mL/g	Solubilization	Preciptiation	1	10	10	Decorin	Decorin OS=Gallus gallus GN=DCN PE=1 SV=1	P28675|PGS2_CHICK	R.ELHLNNNELVR.V	Y	35.67	1349.71	11	1.2	675.861	2	19.66		F11:278	1	271	281
2	20-H/SDS-P	SDS	20 mL/g	Solubilization	Preciptiation	1	10	10	Decorin	Decorin OS=Gallus gallus GN=DCN PE=1 SV=1	P28675|PGS2_CHICK	K.ISPAAFAPLK.K	Y	50.8	1013.59	10	0.8	507.803	2	25.5		F11:455	2	118	127
2	20-H/SDS-P	SDS	20 mL/g	Solubilization	Preciptiation	1	10	10	Decorin	Decorin OS=Gallus gallus GN=DCN PE=1 SV=1	P28675|PGS2_CHICK	K.IDAEGLSGLTNLAK.L	Y	52.02	1400.75	14	0.5	701.383	2	27.9		F11:517	2	234	247
2	20-H/SDS-P	SDS	20 mL/g	Solubilization	Preciptiation	1	10	10	Decorin	Decorin OS=Gallus gallus GN=DCN PE=1 SV=1	P28675|PGS2_CHICK	K.IASIGINDFC(+57.02)PLGYNTK.K	Y	45.33	1881.93	17	1.1	941.973	2	30.42		F11:580	2	302	318	Carbamidomethylation	C10:Carbamidomethylation:1000.00
2	20-H/SDS-P	SDS	20 mL/g	Solubilization	Preciptiation	2	10	10	Decorin	Decorin OS=Gallus gallus GN=DCN PE=1 SV=1	P28675|PGS2_CHICK	S.GFGPVC(+57.02)PFR.C	Y	38.05	1035.5	9	0.8	518.756	2	25.36		F12:457	1	47	55	Carbamidomethylation	C6:Carbamidomethylation:1000.00
2	20-H/SDS-P	SDS	20 mL/g	Solubilization	Preciptiation	2	10	10	Decorin	Decorin OS=Gallus gallus GN=DCN PE=1 SV=1	P28675|PGS2_CHICK	F.SNPVQYWEIQPSAFR.C	Y	41.89	1820.88	15	0.7	911.45	2	30.46		F12:580	2	329	343
2	20-H/SDS-P	SDS	20 mL/g	Solubilization	Preciptiation	2	14	45	Hemoglobin A	Hemoglobin subunit alpha-A OS=Gallus gallus GN=HBAA PE=1 SV=2	P01994|HBA_CHICK	K.KVVAALIEAANHIDDIAGTLSK.L	Y	47.57	2248.24	22	0.4	750.422	3	35.05		F12:682	2	62	83
2	20-H/SDS-P	SDS	20 mL/g	Solubilization	Preciptiation	2	14	45	Hemoglobin A	Hemoglobin subunit alpha-A OS=Gallus gallus GN=HBAA PE=1 SV=2	P01994|HBA_CHICK	K.VVAALIEAANHIDDIAGTLSK.L	Y	44.58	2120.15	21	2	1061.08	2	35.8		F12:697	4	63	83
2	20-H/SDS-P	SDS	20 mL/g	Solubilization	Preciptiation	1	9	7877	Hemoglobin B	Hemoglobin subunit beta OS=Gallus gallus GN=HBB PE=1 SV=2	P02112|HBB_CHICK	K.VNVAEC(+57.02)GAEALAR.L	Y	54.85	1358.66	13	0.5	680.338	2	21.37		F11:330	1	19	31	Carbamidomethylation	C6:Carbamidomethylation:1000.00
2	20-H/SDS-P	SDS	20 mL/g	Solubilization	Preciptiation	1	9	7877	Hemoglobin B	Hemoglobin subunit beta OS=Gallus gallus GN=HBB PE=1 SV=2	P02112|HBB_CHICK	F.GNLSSPTAILGNPMVR(+15.99).A	Y	35.16	1641.85	16	1.8	821.934	2	24.85		F11:436	1	47	62	Oxidation or Hydroxylation	R16:Oxidation or Hydroxylation:0.00
2	20-H/SDS-P	SDS	20 mL/g	Solubilization	Preciptiation	1	9	7877	Hemoglobin B	Hemoglobin subunit beta OS=Gallus gallus GN=HBB PE=1 SV=2	P02112|HBB_CHICK	K.QLITGLWGK.V	Y	30.59	1014.59	9	0.8	508.301	2	28.81		F11:542	1	10	18
2	20-H/SDS-P	SDS	20 mL/g	Solubilization	Preciptiation	1	9	7877	Hemoglobin B	Hemoglobin subunit beta OS=Gallus gallus GN=HBB PE=1 SV=2	P02112|HBB_CHICK	R.LLIVYPWTQR.F	Y	32.54	1287.73	10	0.6	644.875	2	32.18		F11:620	3	32	41
2	20-H/SDS-P	SDS	20 mL/g	Solubilization	Preciptiation	2	9	7877	Hemoglobin B	Hemoglobin subunit beta OS=Gallus gallus GN=HBB PE=1 SV=2	P02112|HBB_CHICK	F.GNLSSPTAILGNP(+15.99)MVR.A	Y	30.06	1641.85	16	1.7	821.934	2	24.59		F12:435	1	47	62	Oxidation or Hydroxylation	P13:Oxidation or Hydroxylation:0.00
2	20-H/SDS-P	SDS	20 mL/g	Solubilization	Preciptiation	2	9	7877	Hemoglobin B	Hemoglobin subunit beta OS=Gallus gallus GN=HBB PE=1 SV=2	P02112|HBB_CHICK	R.FFASF.G	Y	23.11	617.285	5	1.4	618.293	1	32.1		F12:613	3	42	46
2	20-H/SDS-P	SDS	20 mL/g	Solubilization	Preciptiation	2	9	7877	Hemoglobin B	Hemoglobin subunit beta OS=Gallus gallus GN=HBB PE=1 SV=2	P02112|HBB_CHICK	R.FFASFGNLSSPTAILGNPMVR(+15.99).A	Y	31.56	2241.13	21	1.4	1121.57	2	33.84		F12:653	1	42	62	Oxidation or Hydroxylation	R21:Oxidation or Hydroxylation:0.00
2	20-H/SDS-P	SDS	20 mL/g	Solubilization	Preciptiation	2	22	28	Histone 2A	Histone H2A-III OS=Gallus gallus PE=1 SV=2	P35062|H2A3_CHICK	R.AGLQFPVGR.V	Y	40.67	943.524	9	0.8	472.77	2	23.88		F12:415	1	22	30
2	20-H/SDS-P	SDS	20 mL/g	Solubilization	Preciptiation	1	15	41	Histone 2B	Histone H2B 1/2/3/4/6 OS=Gallus gallus GN=H2B-I PE=1 SV=2	P0C1H3|H2B1_CHICK	K.AM(+31.99)GIMNSFVNDIFER.I	Y	30.24	1774.8	15	1.5	888.409	2	32.11		F11:618	1	59	73	Sulphone	M2:Sulphone:0.00
2	20-H/SDS-P	SDS	20 mL/g	Solubilization	Preciptiation	1	15	41	Histone 2B	Histone H2B 1/2/3/4/6 OS=Gallus gallus GN=H2B-I PE=1 SV=2	P0C1H3|H2B1_CHICK	K.AM(+15.99)GIMNSFVNDIFER.I	Y	42.39	1758.81	15	1	880.412	2	36.52		F11:707	2	59	73	Oxidation (M)	M2:Oxidation (M):38.16
2	20-H/SDS-P	SDS	20 mL/g	Solubilization	Preciptiation	1	15	41	Histone 2B	Histone H2B 1/2/3/4/6 OS=Gallus gallus GN=H2B-I PE=1 SV=2	P0C1H3|H2B1_CHICK	K.AMGIMNSFVNDIFER.I	Y	43.81	1742.81	15	1.5	872.415	2	38.85		F11:744	2	59	73
2	20-H/SDS-P	SDS	20 mL/g	Solubilization	Preciptiation	2	15	41	Histone 2B	Histone H2B 1/2/3/4/6 OS=Gallus gallus GN=H2B-I PE=1 SV=2	P0C1H3|H2B1_CHICK	R.LLLPGELAK.H	Y	16.39	952.596	9	0.5	477.305	2	25.91		F12:472	2	101	109
2	20-H/SDS-P	SDS	20 mL/g	Solubilization	Preciptiation	2	15	41	Histone 2B	Histone H2B 1/2/3/4/6 OS=Gallus gallus GN=H2B-I PE=1 SV=2	P0C1H3|H2B1_CHICK	M.NSFVNDIFER.I	Y	38.49	1239.59	10	0.5	620.802	2	29.66		F12:564	2	64	73
2	20-H/SDS-P	SDS	20 mL/g	Solubilization	Preciptiation	1	23	74	Histone 4	Histone H4 OS=Gallus gallus GN=H4-I PE=1 SV=2	P62801|H4_CHICK	K.VFLENVIR.D	Y	35.22	988.571	8	0.5	495.293	2	27.51		F11:508	1	61	68
2	20-H/SDS-P	SDS	20 mL/g	Solubilization	Preciptiation	1	23	74	Histone 4	Histone H4 OS=Gallus gallus GN=H4-I PE=1 SV=2	P62801|H4_CHICK	K.VFLENVIRDAVTYTEHAK.R	Y	17.19	2104.1	18	0.6	702.373	3	37.76		F11:730	1	61	78
2	20-H/SDS-P	SDS	20 mL/g	Solubilization	Preciptiation	2	16	35	Lumican	Lumican OS=Gallus gallus GN=LUM PE=1 SV=1	P51890|LUM_CHICK	R.ADLPQEMYNC(+57.02)LR.V	Y	43.85	1508.68	12	1.4	755.346	2	27.02		F12:500	1	324	335	Carbamidomethylation	C10:Carbamidomethylation:1000.00
2	20-H/SDS-P	SDS	20 mL/g	Solubilization	Preciptiation	2	16	35	Lumican	Lumican OS=Gallus gallus GN=LUM PE=1 SV=1	P51890|LUM_CHICK	K.GLNSLLYLDLSFNQLTK.L	Y	28.64	1938.05	17	1.2	970.032	2	38.68		F12:742	1	187	203
2	20-H/SDS-P	SDS	20 mL/g	Solubilization	Preciptiation	2	16	35	Lumican	Lumican OS=Gallus gallus GN=LUM PE=1 SV=1	P51890|LUM_CHICK	K.LPTGLPHSLLMLYFDNNQISNIPDEYFQGFK.T	Y	31.24	3610.78	31	1.3	1204.6	3	39.38		F12:750	1	204	234
2	20-H/SDS-P	SDS	20 mL/g	Solubilization	Preciptiation	1	12	2182	Myeloid	Myeloid protein 1 OS=Gallus gallus GN=MIM1 PE=1 SV=2	P08940|MIM1_CHICK	K.FFHNGNAIDDGVQIR.G	Y	52.06	1701.82	15	0.3	851.919	2	22.01		F11:350	3	244	258
2	20-H/SDS-P	SDS	20 mL/g	Solubilization	Preciptiation	1	12	2182	Myeloid	Myeloid protein 1 OS=Gallus gallus GN=MIM1 PE=1 SV=2	P08940|MIM1_CHICK	R.HWAQIC(+57.02)SGNPFNR.I	Y	46.17	1585.72	13	0.8	793.868	2	23.12		F11:385	1	32	44	Carbamidomethylation	C6:Carbamidomethylation:1000.00
2	20-H/SDS-P	SDS	20 mL/g	Solubilization	Preciptiation	1	12	2182	Myeloid	Myeloid protein 1 OS=Gallus gallus GN=MIM1 PE=1 SV=2	P08940|MIM1_CHICK	R.FFHN(+.98)GNAIDDGVQIS.G	Y	17.44	1633.74	15	1.4	817.877	2	25.87		F11:466	1	94	108	Deamidation (NQ)	N4:Deamidation (NQ):11.10
2	20-H/SDS-P	SDS	20 mL/g	Solubilization	Preciptiation	2	12	2182	Myeloid	Myeloid protein 1 OS=Gallus gallus GN=MIM1 PE=1 SV=2	P08940|MIM1_CHICK	K.FFHNGNAIDDGVQIR(-.98).G	Y	21.64	1700.84	15	2.4	851.428	2	21.74		F12:348	1	244	258	Amidation	R15:Amidation:1000.00
2	20-H/SDS-P	SDS	20 mL/g	Solubilization	Preciptiation	2	12	2182	Myeloid	Myeloid protein 1 OS=Gallus gallus GN=MIM1 PE=1 SV=2	P08940|MIM1_CHICK	K.FFHN(+.98)GNAIDDGVQIR.G	Y	32.26	1702.81	15	0.4	568.61	3	24.13		F12:423	1	244	258	Deamidation (NQ)	N4:Deamidation (NQ):5.03
2	20-H/SDS-P	SDS	20 mL/g	Solubilization	Preciptiation	2	12	2182	Myeloid	Myeloid protein 1 OS=Gallus gallus GN=MIM1 PE=1 SV=2	P08940|MIM1_CHICK	R.VFPGIISHIHVENC(+57.02)DR.S	Y	34.12	1891.94	16	1.2	631.653	3	24.35		F12:429	2	293	308	Carbamidomethylation	C14:Carbamidomethylation:1000.00
2	20-H/SDS-P	SDS	20 mL/g	Solubilization	Preciptiation	2	12	2182	Myeloid	Myeloid protein 1 OS=Gallus gallus GN=MIM1 PE=1 SV=2	P08940|MIM1_CHICK	K.HKGVDVIC(+57.02)ADGATVYAPF.S	Y	17.77	1918.92	18	0.3	960.47	2	27.55		F12:510	1	217	234	Carbamidomethylation	C8:Carbamidomethylation:1000.00
2	20-H/SDS-P	SDS	20 mL/g	Solubilization	Preciptiation	1	13	36	Osteomodulin	Uncharacterized protein OS=Gallus gallus GN=OMD PE=4 SV=1	tr|R4GF52|R4GF52_CHICK	M.NNLMQLNLC(+57.02)NNK.L	Y	31.45	1474.7	12	0.1	738.358	2	24.65		F11:431	1	211	222	Carbamidomethylation	C9:Carbamidomethylation:1000.00
2	20-H/SDS-P	SDS	20 mL/g	Solubilization	Preciptiation	1	13	36	Osteomodulin	Uncharacterized protein OS=Gallus gallus GN=OMD PE=4 SV=1	tr|R4GF52|R4GF52_CHICK	K.QVFYIPR.S	Y	33.69	921.507	7	0.8	461.761	2	24.98		F11:440	1	294	300
2	20-H/SDS-P	SDS	20 mL/g	Solubilization	Preciptiation	1	13	36	Osteomodulin	Uncharacterized protein OS=Gallus gallus GN=OMD PE=4 SV=1	tr|R4GF52|R4GF52_CHICK	Y.AFFC(+57.02)FPHIR.T	Y	43.32	1193.58	9	0.8	597.798	2	29.91		F11:568	2	350	358	Carbamidomethylation	C4:Carbamidomethylation:1000.00
2	20-H/SDS-P	SDS	20 mL/g	Solubilization	Preciptiation	2	13	36	Osteomodulin	Uncharacterized protein OS=Gallus gallus GN=OMD PE=4 SV=1	tr|R4GF52|R4GF52_CHICK	R.NTFISLPNLIELNLGHNK.L	Y	39.56	2036.11	18	1.1	1019.06	2	35.21		F12:685	4	274	291
2	20-H/SDS-P	SDS	20 mL/g	Solubilization	Preciptiation	1	4	8	Osteonectin	SPARC OS=Gallus gallus GN=SPARC PE=4 SV=1	tr|F1P291|F1P291_CHICK	R.LEAGDHTVELLAR.D	Y	47.02	1422.75	13	1.2	712.381	2	21.61		F11:338	4	201	213
2	20-H/SDS-P	SDS	20 mL/g	Solubilization	Preciptiation	1	4	8	Osteonectin	SPARC OS=Gallus gallus GN=SPARC PE=4 SV=1	tr|F1P291|F1P291_CHICK	F.GIKEQDIDKDLVI	Y	30.15	1484.81	13	0.9	743.412	2	25.41		F11:452	2	286	298
2	20-H/SDS-P	SDS	20 mL/g	Solubilization	Preciptiation	1	4	8	Osteonectin	SPARC OS=Gallus gallus GN=SPARC PE=4 SV=1	tr|F1P291|F1P291_CHICK	R.LEAGDHTVELL.A	Y	27.61	1195.61	11	1	598.812	2	26.25		F11:476	3	201	211
2	20-H/SDS-P	SDS	20 mL/g	Solubilization	Preciptiation	1	4	8	Osteonectin	SPARC OS=Gallus gallus GN=SPARC PE=4 SV=1	tr|F1P291|F1P291_CHICK	L.EEWASC(+57.02)FGIK.E	Y	32.61	1225.54	10	0.7	613.779	2	27.57		F11:510	1	279	288	Carbamidomethylation	C6:Carbamidomethylation:1000.00
2	20-H/SDS-P	SDS	20 mL/g	Solubilization	Preciptiation	1	4	8	Osteonectin	SPARC OS=Gallus gallus GN=SPARC PE=4 SV=1	tr|F1P291|F1P291_CHICK	K.NVLITL.Y	Y	23.43	671.422	6	1	672.43	1	32.07		F11:617	1	168	173
2	20-H/SDS-P	SDS	20 mL/g	Solubilization	Preciptiation	1	4	8	Osteonectin	SPARC OS=Gallus gallus GN=SPARC PE=4 SV=1	tr|F1P291|F1P291_CHICK	Y.IFPVHWQFGQLDQHPIDGYLSHTELAPLR.A	Y	55.09	3413.73	29	1.5	854.441	4	33.18		F11:644	4	223	251
2	20-H/SDS-P	SDS	20 mL/g	Solubilization	Preciptiation	1	4	8	Osteonectin	SPARC OS=Gallus gallus GN=SPARC PE=4 SV=1	tr|F1P291|F1P291_CHICK	Y.IFPVHWQFGQLDQHPIDGYLSHTELAPLRAPLIPMEHC(+57.02)TTR.F	Y	25.36	4820.41	41	2.1	804.411	6	34.19		F11:665	1	223	263	Carbamidomethylation	C38:Carbamidomethylation:1000.00
2	20-H/SDS-P	SDS	20 mL/g	Solubilization	Preciptiation	1	4	8	Osteonectin	SPARC OS=Gallus gallus GN=SPARC PE=4 SV=1	tr|F1P291|F1P291_CHICK	K.NYN(+15.99)MYIFPVHWQFGQLDQHPIDGYLSHTELAPLR.A	Y	51.26	4114.98	34	-0.1	1029.75	4	34.79		F11:676	1	218	251	Oxidation or Hydroxylation	N3:Oxidation or Hydroxylation:11.10
2	20-H/SDS-P	SDS	20 mL/g	Solubilization	Preciptiation	1	4	8	Osteonectin	SPARC OS=Gallus gallus GN=SPARC PE=4 SV=1	tr|F1P291|F1P291_CHICK	K.FIPAC(+57.02)LDTELTEFPLR.M	Y	41	1920.97	16	1.2	961.491	2	34.96		F11:679	6	146	161	Carbamidomethylation	C5:Carbamidomethylation:1000.00
2	20-H/SDS-P	SDS	20 mL/g	Solubilization	Preciptiation	1	4	8	Osteonectin	SPARC OS=Gallus gallus GN=SPARC PE=4 SV=1	tr|F1P291|F1P291_CHICK	K.FIPACLDTE(+57.02)LTEFPLR.M	Y	31.99	1920.97	16	1.3	641.33	3	35.64		F11:693	2	146	161	Carbamidomethylation (DHKE X@N-term)	E9:Carbamidomethylation (DHKE X@N-term):0.00
2	20-H/SDS-P	SDS	20 mL/g	Solubilization	Preciptiation	1	4	8	Osteonectin	SPARC OS=Gallus gallus GN=SPARC PE=4 SV=1	tr|F1P291|F1P291_CHICK	C.DLDNDKYIALEEWASC(+57.02)FGIK.E	Y	11.91	2386.11	20	1.3	796.38	3	37.07		F11:716	1	269	288	Carbamidomethylation	C16:Carbamidomethylation:1000.00
2	20-H/SDS-P	SDS	20 mL/g	Solubilization	Preciptiation	1	4	8	Osteonectin	SPARC OS=Gallus gallus GN=SPARC PE=4 SV=1	tr|F1P291|F1P291_CHICK	K.N(+15.99)YNMYIFPVHWQF.G	Y	12.09	1773.8	13	1	887.907	2	37.57		F11:728	1	218	230	Oxidation or Hydroxylation	N1:Oxidation or Hydroxylation:8.69
2	20-H/SDS-P	SDS	20 mL/g	Solubilization	Preciptiation	2	4	8	Osteonectin	SPARC OS=Gallus gallus GN=SPARC PE=4 SV=1	tr|F1P291|F1P291_CHICK	R.FFEAC(+57.02).D	Y	19.35	672.258	5	0.3	673.265	1	20.94		F12:324	2	264	268	Carbamidomethylation	C5:Carbamidomethylation:1000.00
2	20-H/SDS-P	SDS	20 mL/g	Solubilization	Preciptiation	2	4	8	Osteonectin	SPARC OS=Gallus gallus GN=SPARC PE=4 SV=1	tr|F1P291|F1P291_CHICK	K.LHLDYIGPC(+57.02)K.F	Y	47.55	1214.61	10	0.7	608.313	2	21.09		F12:327	2	136	145	Carbamidomethylation	C9:Carbamidomethylation:1000.00
2	20-H/SDS-P	SDS	20 mL/g	Solubilization	Preciptiation	2	4	8	Osteonectin	SPARC OS=Gallus gallus GN=SPARC PE=4 SV=1	tr|F1P291|F1P291_CHICK	K.RLEAGDHTVELL.A	Y	27.51	1351.71	12	0.4	676.862	2	23.43		F12:400	2	200	211
2	20-H/SDS-P	SDS	20 mL/g	Solubilization	Preciptiation	2	4	8	Osteonectin	SPARC OS=Gallus gallus GN=SPARC PE=4 SV=1	tr|F1P291|F1P291_CHICK	G.I(+57.02)KEQDIDKDLVI	Y	28.04	1484.81	12	0.9	743.412	2	24.94		F12:445	1	287	298	Carbamidomethylation (DHKE X@N-term)	I1:Carbamidomethylation (DHKE X@N-term):12.28
2	20-H/SDS-P	SDS	20 mL/g	Solubilization	Preciptiation	2	4	8	Osteonectin	SPARC OS=Gallus gallus GN=SPARC PE=4 SV=1	tr|F1P291|F1P291_CHICK	K.EQDIDKDLVI	Y	20.18	1186.61	10	0.6	594.312	2	26.23		F12:481	3	289	298
2	20-H/SDS-P	SDS	20 mL/g	Solubilization	Preciptiation	2	4	8	Osteonectin	SPARC OS=Gallus gallus GN=SPARC PE=4 SV=1	tr|F1P291|F1P291_CHICK	K.NVLITLYER.D	Y	38.55	1119.63	9	0.6	560.822	2	27.69		F12:513	1	168	176
2	20-H/SDS-P	SDS	20 mL/g	Solubilization	Preciptiation	2	4	8	Osteonectin	SPARC OS=Gallus gallus GN=SPARC PE=4 SV=1	tr|F1P291|F1P291_CHICK	K.NVLITLYERDEDNNLLTEK.Q	Y	32.27	2291.16	19	1	1146.59	2	29.27		F12:554	8	168	186
2	20-H/SDS-P	SDS	20 mL/g	Solubilization	Preciptiation	2	4	8	Osteonectin	SPARC OS=Gallus gallus GN=SPARC PE=4 SV=1	tr|F1P291|F1P291_CHICK	K.NYNM(+15.99)YIFPVHWQFGQLDQHPIDGYLSHTELAPLR.A	Y	57.38	4114.98	34	0.8	1029.75	4	33.94		F12:655	3	218	251	Oxidation (M)	M4:Oxidation (M):1000.00
2	20-H/SDS-P	SDS	20 mL/g	Solubilization	Preciptiation	2	4	8	Osteonectin	SPARC OS=Gallus gallus GN=SPARC PE=4 SV=1	tr|F1P291|F1P291_CHICK	K.FIT(sub P)AC(+57.02)LDTELTEFPLR.M	Y	18.67	1924.96	16	6.8	963.494	2	34.6		F12:672	1	146	161	Carbamidomethylation; Mutation	C5:Carbamidomethylation:1000.00
2	20-H/SDS-P	SDS	20 mL/g	Solubilization	Preciptiation	2	4	8	Osteonectin	SPARC OS=Gallus gallus GN=SPARC PE=4 SV=1	tr|F1P291|F1P291_CHICK	K.NYNMYIFPVHWQFGQLDQHPIDGYLSHTELAPLR.A	Y	42.46	4098.98	34	0.5	820.804	5	35.1		F12:683	3	218	251
2	20-H/SDS-P	SDS	20 mL/g	Solubilization	Preciptiation	2	4	8	Osteonectin	SPARC OS=Gallus gallus GN=SPARC PE=4 SV=1	tr|F1P291|F1P291_CHICK	K.NYNM(+15.99)YIFPVHWQF.G	Y	19.42	1773.8	13	1.4	887.907	2	36.97		F12:718	1	218	230	Oxidation (M)	M4:Oxidation (M):1000.00
2	20-H/SDS-P	SDS	20 mL/g	Solubilization	Preciptiation	2	4	8	Osteonectin	SPARC OS=Gallus gallus GN=SPARC PE=4 SV=1	tr|F1P291|F1P291_CHICK	E.LAPLR(+21.98).A	Y	13.46	590.352	5	0.1	591.359	1	46.57		F12:828	1	247	251	Sodium adduct	R5:Sodium adduct:1000.00
2	20-H/SDS-P	SDS	20 mL/g	Solubilization	Preciptiation	1	8	19	Pigment Epithelium Derived Factor	Uncharacterized protein OS=Gallus gallus GN=SERPINF1 PE=3 SV=1	tr|E1C7H6|E1C7H6_CHICK	R.LQSLFTSPDFTK.I	Y	49.66	1382.71	12	0.7	692.362	2	28.47		F11:532	3	337	348
2	20-H/SDS-P	SDS	20 mL/g	Solubilization	Preciptiation	1	8	19	Pigment Epithelium Derived Factor	Uncharacterized protein OS=Gallus gallus GN=SERPINF1 PE=3 SV=1	tr|E1C7H6|E1C7H6_CHICK	R.DDTTGTLLFIGK.I	Y	47.96	1279.67	12	0.8	640.841	2	29.43		F11:556	1	403	414
2	20-H/SDS-P	SDS	20 mL/g	Solubilization	Preciptiation	1	8	19	Pigment Epithelium Derived Factor	Uncharacterized protein OS=Gallus gallus GN=SERPINF1 PE=3 SV=1	tr|E1C7H6|E1C7H6_CHICK	R.LTFPIEYHVDRPFLLVL.R	Y	14.2	2071.15	17	0.7	691.391	3	39.56		F11:751	1	385	401
2	20-H/SDS-P	SDS	20 mL/g	Solubilization	Preciptiation	2	8	19	Pigment Epithelium Derived Factor	Uncharacterized protein OS=Gallus gallus GN=SERPINF1 PE=3 SV=1	tr|E1C7H6|E1C7H6_CHICK	R.TVLKDFHLDEDRTVQVS.M	Y	26.35	2001.02	17	1.2	668.014	3	22.93		F12:385	1	229	245
2	20-H/SDS-P	SDS	20 mL/g	Solubilization	Preciptiation	2	8	19	Pigment Epithelium Derived Factor	Uncharacterized protein OS=Gallus gallus GN=SERPINF1 PE=3 SV=1	tr|E1C7H6|E1C7H6_CHICK	F.SLATALSGLSLGAGER.T	Y	38.61	1501.81	16	1.4	751.913	2	30.93		F12:590	2	82	97
2	20-H/SDS-P	SDS	20 mL/g	Solubilization	Preciptiation	2	8	19	Pigment Epithelium Derived Factor	Uncharacterized protein OS=Gallus gallus GN=SERPINF1 PE=3 SV=1	tr|E1C7H6|E1C7H6_CHICK	R.ALSGNTQLDLQEINNWVR.Q	Y	36.62	2070.05	18	1.5	1036.03	2	31.89		F12:608	3	166	183
2	20-H/SDS-P	SDS	20 mL/g	Solubilization	Preciptiation	2	8	19	Pigment Epithelium Derived Factor	Uncharacterized protein OS=Gallus gallus GN=SERPINF1 PE=3 SV=1	tr|E1C7H6|E1C7H6_CHICK	R.LTFPIEYHVDRPFLLVLR.D	Y	24.08	2227.25	18	0.6	557.821	4	34.26		F12:663	3	385	402
2	20-H/SDS-P	SDS	20 mL/g	Solubilization	Preciptiation	1	26	13415		Uncharacterized protein OS=Gallus gallus GN=RCJMB04_34k20 PE=2 SV=1	tr|Q5F347|Q5F347_CHICK	R.AKFYPEDVAEELIQDITQR.L	Y	30.04	2264.13	19	0.7	755.719	3	40.61		F11:762	1	82	100
2	20-H/SDS-P	SDS	20 mL/g	Solubilization	Preciptiation	2	21	13409	Prothrombin	Prothrombin OS=Gallus gallus PE=2 SV=1	tr|Q91001|Q91001_CHICK	K.RPVIFSDYIHPVC(+57.02)LPTK.E	Y	32.48	2041.08	17	0.8	681.369	3	27.45		F12:507	2	457	473	Carbamidomethylation	C13:Carbamidomethylation:1000.00
2	20-H/SDS-P	SDS	20 mL/g	Solubilization	Preciptiation	1	6	3	Serum Albumin	Serum albumin OS=Gallus gallus GN=ALB PE=1 SV=2	P19121|ALBU_CHICK	K.LVKDVVDLAQK.C	N	45.71	1226.72	11	0.6	614.369	2	19.6		F11:276	2	69	79
2	20-H/SDS-P	SDS	20 mL/g	Solubilization	Preciptiation	1	6	3	Serum Albumin	Serum albumin OS=Gallus gallus GN=ALB PE=1 SV=2	P19121|ALBU_CHICK	R.SQC(+57.02)IM(+15.99)EAEFDEKPADLPSLVEK.Y	N	27.9	2551.18	22	0.4	851.402	3	25.98		F11:469	2	315	336	Carbamidomethylation; Oxidation (M)	C3:Carbamidomethylation:1000.00;M5:Oxidation (M):1000.00
2	20-H/SDS-P	SDS	20 mL/g	Solubilization	Preciptiation	1	6	3	Serum Albumin	Serum albumin OS=Gallus gallus GN=ALB PE=1 SV=2	P19121|ALBU_CHICK	K.QSD(+57.02)INTCFGEEGANLIVQSR.A	N	30.29	2237.04	20	2.3	1119.53	2	27.18		F11:501	2	589	608	Carbamidomethylation (DHKE X@N-term)	D3:Carbamidomethylation (DHKE X@N-term):0.00
2	20-H/SDS-P	SDS	20 mL/g	Solubilization	Preciptiation	1	6	3	Serum Albumin	Serum albumin OS=Gallus gallus GN=ALB PE=1 SV=2	P19121|ALBU_CHICK	R.SQC(+57.02)IMEAEFDEKPADLPSLVEK.Y	N	31.34	2535.19	22	1.4	846.071	3	28.27		F11:526	2	315	336	Carbamidomethylation	C3:Carbamidomethylation:1000.00
2	20-H/SDS-P	SDS	20 mL/g	Solubilization	Preciptiation	1	6	3	Serum Albumin	Serum albumin OS=Gallus gallus GN=ALB PE=1 SV=2	P19121|ALBU_CHICK	R.MAC(+57.02)SEGYLSIVIHDTC(+57.02)R.K	N	17.23	2010.9	17	0.2	671.306	3	29.18		F11:550	1	474	490	Carbamidomethylation	C3:Carbamidomethylation:1000.00;C16:Carbamidomethylation:1000.00
2	20-H/SDS-P	SDS	20 mL/g	Solubilization	Preciptiation	1	6	3	Serum Albumin	Serum albumin OS=Gallus gallus GN=ALB PE=1 SV=2	P19121|ALBU_CHICK	K.LLINLIK.R	N	14.69	825.569	7	0.5	413.792	2	30.58		F11:584	1	556	562
2	20-H/SDS-P	SDS	20 mL/g	Solubilization	Preciptiation	1	6	3	Serum Albumin	Serum albumin OS=Gallus gallus GN=ALB PE=1 SV=2	P19121|ALBU_CHICK	R.RHPFLYAPAIL.S	N	35.43	1296.73	11	0.5	649.375	2	30.63		F11:585	2	173	183
2	20-H/SDS-P	SDS	20 mL/g	Solubilization	Preciptiation	1	6	3	Serum Albumin	Serum albumin OS=Gallus gallus GN=ALB PE=1 SV=2	P19121|ALBU_CHICK	K.YVPPPFNPDMF(+15.99)SFDEK.L	N	19.07	1944.86	16	1.7	973.439	2	30.96		F11:593	2	525	540	Oxidation or Hydroxylation	F11:Oxidation or Hydroxylation:9.42
2	20-H/SDS-P	SDS	20 mL/g	Solubilization	Preciptiation	1	6	3	Serum Albumin	Serum albumin OS=Gallus gallus GN=ALB PE=1 SV=2	P19121|ALBU_CHICK	R.VSFLGHFIYS.V	N	29.41	1168.59	10	0.8	585.304	2	33.24		F11:646	2	160	169
2	20-H/SDS-P	SDS	20 mL/g	Solubilization	Preciptiation	1	6	3	Serum Albumin	Serum albumin OS=Gallus gallus GN=ALB PE=1 SV=2	P19121|ALBU_CHICK	K.AVAMITFAQYLQR.C	Y	38.81	1510.8	13	0.4	756.406	2	33.68		F11:653	2	48	60
2	20-H/SDS-P	SDS	20 mL/g	Solubilization	Preciptiation	1	6	3	Serum Albumin	Serum albumin OS=Gallus gallus GN=ALB PE=1 SV=2	P19121|ALBU_CHICK	R.RHPFLYAPAILSF.A	N	30.42	1530.83	13	0.9	766.425	2	35.6		F11:692	1	173	185
2	20-H/SDS-P	SDS	20 mL/g	Solubilization	Preciptiation	1	6	3	Serum Albumin	Serum albumin OS=Gallus gallus GN=ALB PE=1 SV=2	P19121|ALBU_CHICK	K.C(+57.02)VANEDAT(sub P)EC(+57.02)SKPLPSIILDEIC(+57.02)QVEK.L	N	12.22	3117.47	27	5.8	1040.17	3	36.14		F11:701	1	80	106	Carbamidomethylation; Mutation	C1:Carbamidomethylation:1000.00;C10:Carbamidomethylation:1000.00;C23:Carbamidomethylation:1000.00
2	20-H/SDS-P	SDS	20 mL/g	Solubilization	Preciptiation	2	7	2	Serum Albumin	Serum albumin OS=Gallus gallus GN=ALB PE=4 SV=2	tr|F2Z4L6|F2Z4L6_CHICK	R.KQETTPINDNVSQC(+57.02)C(+57.02)SSSYANR.R	Y	29.78	2558.11	22	1.7	853.713	3	15.59		F12:160	1	441	462	Carbamidomethylation	C14:Carbamidomethylation:1000.00;C15:Carbamidomethylation:1000.00
2	20-H/SDS-P	SDS	20 mL/g	Solubilization	Preciptiation	2	6	3	Serum Albumin	Serum albumin OS=Gallus gallus GN=ALB PE=1 SV=2	P19121|ALBU_CHICK	R.MMSNLC(+57.02)SQQDVFSGK.I	N	32.35	1730.74	15	0.8	866.379	2	22.82		F12:382	2	288	302	Carbamidomethylation	C6:Carbamidomethylation:1000.00
2	20-H/SDS-P	SDS	20 mL/g	Solubilization	Preciptiation	2	6	3	Serum Albumin	Serum albumin OS=Gallus gallus GN=ALB PE=1 SV=2	P19121|ALBU_CHICK	K.TN(sub D)NPAEC(+57.02)YANAQEQLNQHIK.E	N	12.54	2342.07	20	-5.5	781.693	3	23.14		F12:391	1	391	410	Carbamidomethylation; Mutation	C7:Carbamidomethylation:1000.00
2	20-H/SDS-P	SDS	20 mL/g	Solubilization	Preciptiation	2	6	3	Serum Albumin	Serum albumin OS=Gallus gallus GN=ALB PE=1 SV=2	P19121|ALBU_CHICK	K.KMPQVPTDLLLETGKK.M	N	38.73	1797.01	16	0.8	600.01	3	25.03		F12:448	2	442	457
2	20-H/SDS-P	SDS	20 mL/g	Solubilization	Preciptiation	2	6	3	Serum Albumin	Serum albumin OS=Gallus gallus GN=ALB PE=1 SV=2	P19121|ALBU_CHICK	K.QQYFC(+57.02)GILK.Q	N	41.2	1155.57	9	1	578.795	2	25.88		F12:471	3	224	232	Carbamidomethylation	C5:Carbamidomethylation:1000.00
2	20-H/SDS-P	SDS	20 mL/g	Solubilization	Preciptiation	2	6	3	Serum Albumin	Serum albumin OS=Gallus gallus GN=ALB PE=1 SV=2	P19121|ALBU_CHICK	K.KMPQVPTDLLLETGK.K	N	12.9	1668.91	15	1.1	557.312	3	27.31		F12:504	1	442	456
2	20-H/SDS-P	SDS	20 mL/g	Solubilization	Preciptiation	2	6	3	Serum Albumin	Serum albumin OS=Gallus gallus GN=ALB PE=1 SV=2	P19121|ALBU_CHICK	R.VSFLGHFIYSVAR.R	N	49.73	1494.8	13	1.5	748.408	2	32.63		F12:626	2	160	172
2	20-H/SDS-P	SDS	20 mL/g	Solubilization	Preciptiation	2	6	3	Serum Albumin	Serum albumin OS=Gallus gallus GN=ALB PE=1 SV=2	P19121|ALBU_CHICK	K.C(+57.02)VANEDAPEC(+57.02)SKPLPSIILDEIC(+57.02)QVEK.L	N	21.19	3113.47	27	2	1038.83	3	35.29		F12:687	1	80	106	Carbamidomethylation	C1:Carbamidomethylation:1000.00;C10:Carbamidomethylation:1000.00;C23:Carbamidomethylation:1000.00
2	20-H/SDS-P	SDS	20 mL/g	Solubilization	Preciptiation	1	17	616	Thrombospondin-1	Uncharacterized protein OS=Gallus gallus GN=THBS1 PE=4 SV=2	tr|F1P0J8|F1P0J8_CHICK	K.GGVNDNFQGLLQNVR.F	Y	28.5	1629.82	15	0.7	815.919	2	28.96		F11:546	1	207	221
2	20-H/SDS-P	SDS	20 mL/g	Solubilization	Preciptiation	1	17	616	Thrombospondin-1	Uncharacterized protein OS=Gallus gallus GN=THBS1 PE=4 SV=2	tr|F1P0J8|F1P0J8_CHICK	K.FQDLLDIIHAEK.G	Y	41.67	1440.76	12	0.5	481.261	3	31.43		F11:603	1	80	91
2	20-H/SDS-P	SDS	20 mL/g	Solubilization	Preciptiation	1	17	616	Thrombospondin-1	Uncharacterized protein OS=Gallus gallus GN=THBS1 PE=4 SV=2	tr|F1P0J8|F1P0J8_CHICK	K.QQLVSVEDALLATGHWK.N	Y	20.86	1893.99	17	0.3	632.339	3	31.8		F11:611	1	143	159
2	20-H/SDS-P	SDS	20 mL/g	Solubilization	Preciptiation	1	19	13412	Vimetin	Vimentin OS=Gallus gallus GN=VIM PE=3 SV=2	P09654|VIME_CHICK	K.ILLAELEQLK.G	Y	40.18	1168.71	10	0.6	585.361	2	31.71		F11:609	2	124	133
2	20-H/SDS-P	SDS	20 mL/g	Solubilization	Preciptiation	1	11	20	Vitronectin	Vitronectin OS=Gallus gallus PE=2 SV=1	tr|O12945|O12945_CHICK	K.TYLFKGSQ(+.98)YWR(+14.02).F	Y	12.26	1462.72	11	5	488.584	3	19.14		F11:261	1	217	227	Deamidation (NQ); Methyl ester	Q8:Deamidation (NQ):1000.00;R11:Methyl ester:1000.00
2	20-H/SDS-P	SDS	20 mL/g	Solubilization	Preciptiation	1	11	20	Vitronectin	Vitronectin OS=Gallus gallus PE=2 SV=1	tr|O12945|O12945_CHICK	R.GVPNQLDAAMAGR.I	Y	35.08	1298.64	13	0.5	650.328	2	21.93		F11:347	1	338	350
2	20-H/SDS-P	SDS	20 mL/g	Solubilization	Preciptiation	1	11	20	Vitronectin	Vitronectin OS=Gallus gallus PE=2 SV=1	tr|O12945|O12945_CHICK	R.FDDGALDPGYPR.D	Y	31.83	1321.59	12	0.8	661.805	2	22.24		F11:357	2	228	239
2	20-H/SDS-P	SDS	20 mL/g	Solubilization	Preciptiation	1	11	20	Vitronectin	Vitronectin OS=Gallus gallus PE=2 SV=1	tr|O12945|O12945_CHICK	R.SIAQYWLDC(+57.02)PQPDEEST	Y	13.78	2037.86	17	0.7	1019.94	2	30.85		F11:590	1	437	453	Carbamidomethylation	C9:Carbamidomethylation:1000.00
2	20-H/SDS-P	SDS	20 mL/g	Solubilization	Preciptiation	1	11	20	Vitronectin	Vitronectin OS=Gallus gallus PE=2 SV=1	tr|O12945|O12945_CHICK	K.LISDVWGIEGPIDAAFTR.I	Y	49.71	1959.01	18	1.3	654.011	3	37.1		F11:717	4	193	210
2	20-H/SDS-P	SDS	20 mL/g	Solubilization	Preciptiation	2	11	20	Vitronectin	Vitronectin OS=Gallus gallus PE=2 SV=1	tr|O12945|O12945_CHICK	R.DISEGFEGIPNDIDAAFALPAHSYHGNER.V	Y	39.84	3141.44	29	1.7	786.369	4	32.9		F12:633	2	240	268
3	20-H/Urea-D	Urea	20 mL/g	Solubilization	Dialysis	1	6	7	Alpha-2-HS-glycoprotein	Uncharacterized protein OS=Gallus gallus GN=AHSG PE=4 SV=1	tr|E1BZE1|E1BZE1_CHICK	K.VNGQ(+.98)FSVLASK.C	Y	34.08	1149.6	11	1	575.809	2	20.88		F27:339	1	118	128	Deamidation (NQ)	Q4:Deamidation (NQ):22.85
3	20-H/Urea-D	Urea	20 mL/g	Solubilization	Dialysis	1	6	7	Alpha-2-HS-glycoprotein	Uncharacterized protein OS=Gallus gallus GN=AHSG PE=4 SV=1	tr|E1BZE1|E1BZE1_CHICK	K.NPDVYLM(+15.99)LLEIGR.A	Y	17.8	1547.8	13	1	774.909	2	32.76		F27:521	1	172	184	Oxidation (M)	M7:Oxidation (M):1000.00
3	20-H/Urea-D	Urea	20 mL/g	Solubilization	Dialysis	1	6	7	Alpha-2-HS-glycoprotein	Uncharacterized protein OS=Gallus gallus GN=AHSG PE=4 SV=1	tr|E1BZE1|E1BZE1_CHICK	A.APAAPPPPLGC(+57.02)DDPEIEAAAEFAVIYINGHSHHGYR.F	Y	21.36	3838.82	36	1.8	960.713	4	33.19		F27:528	1	19	54	Carbamidomethylation	C11:Carbamidomethylation:1000.00
3	20-H/Urea-D	Urea	20 mL/g	Solubilization	Dialysis	2	6	7	Alpha-2-HS-glycoprotein	Uncharacterized protein OS=Gallus gallus GN=AHSG PE=4 SV=1	tr|E1BZE1|E1BZE1_CHICK	K.VN(+.98)GQFSVLASK.C	Y	42.77	1149.6	11	1.1	575.809	2	20.76		F28:336	1	118	128	Deamidation (NQ)	N2:Deamidation (NQ):21.68
3	20-H/Urea-D	Urea	20 mL/g	Solubilization	Dialysis	2	6	7	Alpha-2-HS-glycoprotein	Uncharacterized protein OS=Gallus gallus GN=AHSG PE=4 SV=1	tr|E1BZE1|E1BZE1_CHICK	K.NPDVY(+15.99)LM(+15.99)LLEIGR.A	Y	17.64	1563.8	13	1.2	782.907	2	35.57		F28:523	1	172	184	Oxidation or Hydroxylation; Oxidation (M)	Y5:Oxidation or Hydroxylation:8.26;M7:Oxidation (M):1000.00
3	20-H/Urea-D	Urea	20 mL/g	Solubilization	Dialysis	1	3	6	Apolipoprotein	Apolipoprotein A-I OS=Gallus gallus GN=APOA1 PE=1 SV=2	P08250|APOA1_CHICK	K.LADNLDTLSAAAAK.L	Y	35.62	1372.72	14	0.9	687.368	2	21.22		F27:347	2	69	82
3	20-H/Urea-D	Urea	20 mL/g	Solubilization	Dialysis	1	3	6	Apolipoprotein	Apolipoprotein A-I OS=Gallus gallus GN=APOA1 PE=1 SV=2	P08250|APOA1_CHICK	K.IRPFLDQFSAK.W	Y	32.83	1320.72	11	0.6	441.247	3	23.83		F27:405	3	120	130
3	20-H/Urea-D	Urea	20 mL/g	Solubilization	Dialysis	1	3	6	Apolipoprotein	Apolipoprotein A-I OS=Gallus gallus GN=APOA1 PE=1 SV=2	P08250|APOA1_CHICK	R.EM(+15.99)WLKDTEALRAELTK.D	Y	38.4	1948.99	16	0.7	650.672	3	25.91		F27:441	1	96	111	Oxidation (M)	M2:Oxidation (M):1000.00
3	20-H/Urea-D	Urea	20 mL/g	Solubilization	Dialysis	2	3	6	Apolipoprotein	Apolipoprotein A-I OS=Gallus gallus GN=APOA1 PE=1 SV=2	P08250|APOA1_CHICK	K.WTEELEQYR.Q	Y	37.79	1252.57	9	0.7	627.294	2	20.61		F28:332	2	131	139
3	20-H/Urea-D	Urea	20 mL/g	Solubilization	Dialysis	2	3	6	Apolipoprotein	Apolipoprotein A-I OS=Gallus gallus GN=APOA1 PE=1 SV=2	P08250|APOA1_CHICK	R.EM(+15.99)WLKDTEALR.A	Y	31.5	1406.69	11	1	704.351	2	21.09		F28:345	1	96	106	Oxidation (M)	M2:Oxidation (M):1000.00
3	20-H/Urea-D	Urea	20 mL/g	Solubilization	Dialysis	2	3	6	Apolipoprotein	Apolipoprotein A-I OS=Gallus gallus GN=APOA1 PE=1 SV=2	P08250|APOA1_CHICK	K.M(+15.99)TPLVQEFR.E	Y	39.64	1135.57	9	1.2	568.793	2	21.13		F28:346	1	230	238	Oxidation (M)	M1:Oxidation (M):1000.00
3	20-H/Urea-D	Urea	20 mL/g	Solubilization	Dialysis	2	3	6	Apolipoprotein	Apolipoprotein A-I OS=Gallus gallus GN=APOA1 PE=1 SV=2	P08250|APOA1_CHICK	K.MTPLVQEFR.E	Y	43.79	1119.57	9	0.8	560.795	2	23.9		F28:396	2	230	238
3	20-H/Urea-D	Urea	20 mL/g	Solubilization	Dialysis	2	3	6	Apolipoprotein	Apolipoprotein A-I OS=Gallus gallus GN=APOA1 PE=1 SV=2	P08250|APOA1_CHICK	R.LISFLDELQK.S	Y	35.12	1204.67	10	0.7	603.343	2	30.39		F28:474	2	252	261
3	20-H/Urea-D	Urea	20 mL/g	Solubilization	Dialysis	1	2	4	Collagen I, alpha 1	Collagen alpha-1(I) chain OS=Gallus gallus GN=COL1A1 PE=1 SV=3	P02457|CO1A1_CHICK	R.DGAAGPKGDRGETGPAGPP(+15.99)GAPGAP(+15.99)GAP(+15.99)GPVGPAGK.N	Y	25.61	3092.49	36	2.1	1031.84	3	13.18		F27:135	2	1016	1051	Oxidation or Hydroxylation	P19:Oxidation or Hydroxylation:0.00;P25:Oxidation or Hydroxylation:0.00;P28:Oxidation or Hydroxylation:27.42
3	20-H/Urea-D	Urea	20 mL/g	Solubilization	Dialysis	1	2	4	Collagen I, alpha 1	Collagen alpha-1(I) chain OS=Gallus gallus GN=COL1A1 PE=1 SV=3	P02457|CO1A1_CHICK	K.GDRGETGPAGP(+15.99)PGAPGAP(+15.99)GAP(+15.99)GPVGPAGK.N	Y	24.5	2496.2	29	1.1	833.075	3	13.64		F27:144	1	1023	1051	Oxidation or Hydroxylation	P11:Oxidation or Hydroxylation:0.00;P18:Oxidation or Hydroxylation:28.36;P21:Oxidation or Hydroxylation:53.33
3	20-H/Urea-D	Urea	20 mL/g	Solubilization	Dialysis	1	2	4	Collagen I, alpha 1	Collagen alpha-1(I) chain OS=Gallus gallus GN=COL1A1 PE=1 SV=3	P02457|CO1A1_CHICK	R.GSAGPP(+15.99)GATGFP(+15.99)GAAGR.V	Y	43.91	1458.69	17	1	730.351	2	14.72		F27:169	2	855	871	Oxidation or Hydroxylation	P6:Oxidation or Hydroxylation:12.28;P12:Oxidation or Hydroxylation:14.62
3	20-H/Urea-D	Urea	20 mL/g	Solubilization	Dialysis	1	2	4	Collagen I, alpha 1	Collagen alpha-1(I) chain OS=Gallus gallus GN=COL1A1 PE=1 SV=3	P02457|CO1A1_CHICK	R.GLTGPIGPP(+15.99)GPAGAP(+15.99)GDKGEAGPP(+15.99)GPAGPTGAR.G	Y	41.15	2878.42	33	1.8	960.483	3	17.33		F27:240	1	753	785	Oxidation or Hydroxylation	P9:Oxidation or Hydroxylation:49.35;P15:Oxidation or Hydroxylation:33.81;P24:Oxidation or Hydroxylation:14.62
3	20-H/Urea-D	Urea	20 mL/g	Solubilization	Dialysis	1	2	4	Collagen I, alpha 1	Collagen alpha-1(I) chain OS=Gallus gallus GN=COL1A1 PE=1 SV=3	P02457|CO1A1_CHICK	K.GATGAP(+15.99)GIAGAP(+15.99)GFPGAR(+15.99).G	Y	32.98	1571.77	18	1.4	786.893	2	17.58		F27:248	2	387	404	Oxidation or Hydroxylation	P6:Oxidation or Hydroxylation:64.00;P12:Oxidation or Hydroxylation:0.00;R18:Oxidation or Hydroxylation:0.00
3	20-H/Urea-D	Urea	20 mL/g	Solubilization	Dialysis	1	2	4	Collagen I, alpha 1	Collagen alpha-1(I) chain OS=Gallus gallus GN=COL1A1 PE=1 SV=3	P02457|CO1A1_CHICK	R.GQAGVMGFPGPK(+15.99).G	Y	37.41	1160.56	12	0.9	581.29	2	19.1		F27:288	1	564	575	Oxidation or Hydroxylation	K12:Oxidation or Hydroxylation:0.00
3	20-H/Urea-D	Urea	20 mL/g	Solubilization	Dialysis	1	2	4	Collagen I, alpha 1	Collagen alpha-1(I) chain OS=Gallus gallus GN=COL1A1 PE=1 SV=3	P02457|CO1A1_CHICK	R.GQAGVM(+15.99)GFP(+15.99)GPK.G	Y	45.98	1176.56	12	1.1	589.288	2	19.37		F27:297	2	564	575	Oxidation (M); Oxidation or Hydroxylation	M6:Oxidation (M):1000.00;P9:Oxidation or Hydroxylation:12.81
3	20-H/Urea-D	Urea	20 mL/g	Solubilization	Dialysis	1	2	4	Collagen I, alpha 1	Collagen alpha-1(I) chain OS=Gallus gallus GN=COL1A1 PE=1 SV=3	P02457|CO1A1_CHICK	R.GFSGLQGPP(+15.99)GPPGAP(+15.99)GEQGPSGASGPAGPR.G	Y	38.4	2672.26	30	1.8	1337.14	2	19.89		F27:313	1	1101	1130	Oxidation or Hydroxylation	P9:Oxidation or Hydroxylation:45.01;P15:Oxidation or Hydroxylation:50.34
3	20-H/Urea-D	Urea	20 mL/g	Solubilization	Dialysis	1	2	4	Collagen I, alpha 1	Collagen alpha-1(I) chain OS=Gallus gallus GN=COL1A1 PE=1 SV=3	P02457|CO1A1_CHICK	K.DGLNGLP(+15.99)GPIGPPGPR(+31.99).G	Y	24.58	1560.79	16	0.9	781.403	2	20.18		F27:320	1	1142	1157	Oxidation or Hydroxylation; Dihydroxy	P7:Oxidation or Hydroxylation:26.31;R16:Dihydroxy:3.13
3	20-H/Urea-D	Urea	20 mL/g	Solubilization	Dialysis	1	2	4	Collagen I, alpha 1	Collagen alpha-1(I) chain OS=Gallus gallus GN=COL1A1 PE=1 SV=3	P02457|CO1A1_CHICK	K.DGLNGLP(+15.99)GPIGPP(+15.99)GPR(+15.99).G	Y	16.06	1560.79	16	0.8	781.403	2	20.55		F27:329	1	1142	1157	Oxidation or Hydroxylation	P7:Oxidation or Hydroxylation:14.04;P13:Oxidation or Hydroxylation:0.00;R16:Oxidation or Hydroxylation:0.00
3	20-H/Urea-D	Urea	20 mL/g	Solubilization	Dialysis	2	2	4	Collagen I, alpha 1	Collagen alpha-1(I) chain OS=Gallus gallus GN=COL1A1 PE=1 SV=3	P02457|CO1A1_CHICK	R.GAP(+15.99)GPP(+15.99)GAVGAAGKDGEAGAQGPP(+15.99)GPTGPAGER.G	Y	36.93	2855.34	33	1.4	952.79	3	13.59		F28:151	2	588	620	Oxidation or Hydroxylation	P3:Oxidation or Hydroxylation:14.04;P6:Oxidation or Hydroxylation:17.01;P24:Oxidation or Hydroxylation:17.91
3	20-H/Urea-D	Urea	20 mL/g	Solubilization	Dialysis	2	2	4	Collagen I, alpha 1	Collagen alpha-1(I) chain OS=Gallus gallus GN=COL1A1 PE=1 SV=3	P02457|CO1A1_CHICK	R.GAP(+15.99)GPP(+15.99)GAVGAAGKDGEAGAQGPPGPTGPAGER.G	Y	36.39	2839.35	33	1.4	947.458	3	14.19		F28:163	2	588	620	Oxidation or Hydroxylation	P3:Oxidation or Hydroxylation:9.40;P6:Oxidation or Hydroxylation:12.28
3	20-H/Urea-D	Urea	20 mL/g	Solubilization	Dialysis	2	2	4	Collagen I, alpha 1	Collagen alpha-1(I) chain OS=Gallus gallus GN=COL1A1 PE=1 SV=3	P02457|CO1A1_CHICK	R.GEP(+15.99)GPAGLP(+15.99)GPAGER.G	Y	38.64	1392.66	15	0.4	697.339	2	14.92		F28:178	3	462	476	Oxidation or Hydroxylation	P3:Oxidation or Hydroxylation:5.47;P9:Oxidation or Hydroxylation:14.63
3	20-H/Urea-D	Urea	20 mL/g	Solubilization	Dialysis	2	2	4	Collagen I, alpha 1	Collagen alpha-1(I) chain OS=Gallus gallus GN=COL1A1 PE=1 SV=3	P02457|CO1A1_CHICK	R.GFP(+15.99)GADGIAGPKGPP(+15.99)GER.G	Y	44.17	1710.83	18	1.4	856.425	2	16.25		F28:207	2	483	500	Oxidation or Hydroxylation	P3:Oxidation or Hydroxylation:17.01;P15:Oxidation or Hydroxylation:0.00
3	20-H/Urea-D	Urea	20 mL/g	Solubilization	Dialysis	2	2	4	Collagen I, alpha 1	Collagen alpha-1(I) chain OS=Gallus gallus GN=COL1A1 PE=1 SV=3	P02457|CO1A1_CHICK	K.GSP(+15.99)GADGPIGAP(+15.99)GTP(+15.99)GPQGIAGQR.G	Y	32.59	2162.04	24	1.7	1082.03	2	16.73		F28:219	2	924	947	Oxidation or Hydroxylation	P3:Oxidation or Hydroxylation:0.00;P12:Oxidation or Hydroxylation:39.44;P15:Oxidation or Hydroxylation:15.73
3	20-H/Urea-D	Urea	20 mL/g	Solubilization	Dialysis	2	2	4	Collagen I, alpha 1	Collagen alpha-1(I) chain OS=Gallus gallus GN=COL1A1 PE=1 SV=3	P02457|CO1A1_CHICK	K.GSPGAD(+15.99)GPIGAP(+15.99)GTP(+15.99)GPQGIAGQR.G	Y	26.47	2162.04	24	1.4	1082.03	2	16.95		F28:227	1	924	947	Oxidation or Hydroxylation	D6:Oxidation or Hydroxylation:0.00;P12:Oxidation or Hydroxylation:39.44;P15:Oxidation or Hydroxylation:17.01
3	20-H/Urea-D	Urea	20 mL/g	Solubilization	Dialysis	2	2	4	Collagen I, alpha 1	Collagen alpha-1(I) chain OS=Gallus gallus GN=COL1A1 PE=1 SV=3	P02457|CO1A1_CHICK	R.GLTGPIGPP(+15.99)GPAGAPGD(+15.99)KGEAGPP(+15.99)GPAGPTGAR.G	Y	50.87	2878.42	33	2	960.483	3	17.09		F28:231	3	753	785	Oxidation or Hydroxylation	P9:Oxidation or Hydroxylation:20.41;D17:Oxidation or Hydroxylation:10.92;P24:Oxidation or Hydroxylation:20.41
3	20-H/Urea-D	Urea	20 mL/g	Solubilization	Dialysis	2	2	4	Collagen I, alpha 1	Collagen alpha-1(I) chain OS=Gallus gallus GN=COL1A1 PE=1 SV=3	P02457|CO1A1_CHICK	K.GATGAP(+15.99)GIAGAPGF(+15.99)P(+15.99)GAR.G	Y	23.82	1571.77	18	1.5	786.893	2	17.15		F28:233	1	387	404	Oxidation or Hydroxylation	P6:Oxidation or Hydroxylation:72.73;F14:Oxidation or Hydroxylation:0.00;P15:Oxidation or Hydroxylation:9.42
3	20-H/Urea-D	Urea	20 mL/g	Solubilization	Dialysis	2	2	4	Collagen I, alpha 1	Collagen alpha-1(I) chain OS=Gallus gallus GN=COL1A1 PE=1 SV=3	P02457|CO1A1_CHICK	K.GATGAP(+15.99)GIAGAPGF(+15.99)PGAR(+15.99).G	Y	31.37	1571.77	18	1.5	786.893	2	17.39		F28:240	1	387	404	Oxidation or Hydroxylation	P6:Oxidation or Hydroxylation:72.73;F14:Oxidation or Hydroxylation:8.22;R18:Oxidation or Hydroxylation:0.00
3	20-H/Urea-D	Urea	20 mL/g	Solubilization	Dialysis	2	2	4	Collagen I, alpha 1	Collagen alpha-1(I) chain OS=Gallus gallus GN=COL1A1 PE=1 SV=3	P02457|CO1A1_CHICK	R.GPP(+15.99)GPMGPP(+15.99)GLAGPP(+15.99)GEAGR.E	Y	41.88	1815.86	20	1.6	908.937	2	17.44		F28:242	3	984	1003	Oxidation or Hydroxylation	P3:Oxidation or Hydroxylation:17.01;P9:Oxidation or Hydroxylation:17.01;P15:Oxidation or Hydroxylation:11.06
3	20-H/Urea-D	Urea	20 mL/g	Solubilization	Dialysis	2	2	4	Collagen I, alpha 1	Collagen alpha-1(I) chain OS=Gallus gallus GN=COL1A1 PE=1 SV=3	P02457|CO1A1_CHICK	R.GFP(+15.99)GADGIAGPK.G	Y	43.5	1101.55	12	0.9	551.78	2	17.7		F28:250	3	483	494	Oxidation or Hydroxylation	P3:Oxidation or Hydroxylation:8.69
3	20-H/Urea-D	Urea	20 mL/g	Solubilization	Dialysis	2	2	4	Collagen I, alpha 1	Collagen alpha-1(I) chain OS=Gallus gallus GN=COL1A1 PE=1 SV=3	P02457|CO1A1_CHICK	R.GLTGPIGPP(+15.99)GPAGAPGDKGEAGPPGP(+15.99)AGPTGAR.G	Y	27.48	2862.43	33	0	955.149	3	17.79		F28:253	1	753	785	Oxidation or Hydroxylation	P9:Oxidation or Hydroxylation:0.00;P26:Oxidation or Hydroxylation:0.00
3	20-H/Urea-D	Urea	20 mL/g	Solubilization	Dialysis	2	2	4	Collagen I, alpha 1	Collagen alpha-1(I) chain OS=Gallus gallus GN=COL1A1 PE=1 SV=3	P02457|CO1A1_CHICK	R.GPP(+15.99)GPMGPPGLAGPP(+15.99)GEAGR.E	Y	37.96	1799.86	20	0.9	900.939	2	18.67		F28:281	2	984	1003	Oxidation or Hydroxylation	P3:Oxidation or Hydroxylation:17.01;P15:Oxidation or Hydroxylation:0.00
3	20-H/Urea-D	Urea	20 mL/g	Solubilization	Dialysis	2	2	4	Collagen I, alpha 1	Collagen alpha-1(I) chain OS=Gallus gallus GN=COL1A1 PE=1 SV=3	P02457|CO1A1_CHICK	R.GFSGLQGPP(+15.99)GPP(+15.99)GAP(+15.99)GEQGPSGASGPAGPR.G	Y	37.52	2688.25	30	2.6	1345.14	2	18.94		F28:287	3	1101	1130	Oxidation or Hydroxylation	P9:Oxidation or Hydroxylation:17.01;P12:Oxidation or Hydroxylation:0.00;P15:Oxidation or Hydroxylation:25.70
3	20-H/Urea-D	Urea	20 mL/g	Solubilization	Dialysis	2	2	4	Collagen I, alpha 1	Collagen alpha-1(I) chain OS=Gallus gallus GN=COL1A1 PE=1 SV=3	P02457|CO1A1_CHICK	R.GQAGVMGFPGP(+15.99)K.G	Y	44.63	1160.56	12	0.7	581.29	2	19.04		F28:290	1	564	575	Oxidation or Hydroxylation	P11:Oxidation or Hydroxylation:0.00
3	20-H/Urea-D	Urea	20 mL/g	Solubilization	Dialysis	2	2	4	Collagen I, alpha 1	Collagen alpha-1(I) chain OS=Gallus gallus GN=COL1A1 PE=1 SV=3	P02457|CO1A1_CHICK	R.GQAGVMGFP(+15.99)GPK.G	Y	45.58	1160.56	12	0.9	581.29	2	19.19		F28:294	2	564	575	Oxidation or Hydroxylation	P9:Oxidation or Hydroxylation:0.00
3	20-H/Urea-D	Urea	20 mL/g	Solubilization	Dialysis	2	2	4	Collagen I, alpha 1	Collagen alpha-1(I) chain OS=Gallus gallus GN=COL1A1 PE=1 SV=3	P02457|CO1A1_CHICK	R.GFSGLQGP(+15.99)PGPP(+15.99)GAP(+15.99)GEQGPSGASGPAGPR.G	Y	32.74	2688.25	30	3.4	1345.14	2	19.41		F28:301	1	1101	1130	Oxidation or Hydroxylation	P8:Oxidation or Hydroxylation:0.00;P12:Oxidation or Hydroxylation:10.11;P15:Oxidation or Hydroxylation:25.70
3	20-H/Urea-D	Urea	20 mL/g	Solubilization	Dialysis	2	2	4	Collagen I, alpha 1	Collagen alpha-1(I) chain OS=Gallus gallus GN=COL1A1 PE=1 SV=3	P02457|CO1A1_CHICK	K.DGLNGLP(+15.99)GPIGPP(+31.99)GPR.G	Y	25.31	1560.79	16	0.8	781.403	2	20.23		F28:321	1	1142	1157	Oxidation or Hydroxylation; Dihydroxy	P7:Oxidation or Hydroxylation:14.04;P13:Dihydroxy:0.00
3	20-H/Urea-D	Urea	20 mL/g	Solubilization	Dialysis	2	2	4	Collagen I, alpha 1	Collagen alpha-1(I) chain OS=Gallus gallus GN=COL1A1 PE=1 SV=3	P02457|CO1A1_CHICK	K.SLSQQIENIR.S	Y	34.52	1186.63	10	0.5	594.323	2	20.97		F28:342	1	1226	1235
3	20-H/Urea-D	Urea	20 mL/g	Solubilization	Dialysis	2	2	4	Collagen I, alpha 1	Collagen alpha-1(I) chain OS=Gallus gallus GN=COL1A1 PE=1 SV=3	P02457|CO1A1_CHICK	K.SGEYWIDPNQGCNLDAIK(+57.02).V	Y	19.37	2078.94	18	1.3	1040.48	2	26.04		F28:420	1	1260	1277	Carbamidomethylation (DHKE X@N-term)	K18:Carbamidomethylation (DHKE X@N-term):0.00
3	20-H/Urea-D	Urea	20 mL/g	Solubilization	Dialysis	1	1	1	Collagen I, alpha 2	Collagen alpha-2(I) chain OS=Gallus gallus GN=COL1A2 PE=4 SV=1	tr|F1P0H9|F1P0H9_CHICK	R.VGN(sub P)P(+15.99)GPAGITGPP(+15.99)GPP(+15.99)GPAGK.D	Y	26.59	1841.93	21	5.2	921.976	2	16.21		F27:208	1	794	814	Oxidation or Hydroxylation; Mutation	P4:Oxidation or Hydroxylation:12.28;P13:Oxidation or Hydroxylation:30.46;P16:Oxidation or Hydroxylation:12.28
3	20-H/Urea-D	Urea	20 mL/g	Solubilization	Dialysis	1	1	1	Collagen I, alpha 2	Collagen alpha-2(I) chain OS=Gallus gallus GN=COL1A2 PE=4 SV=1	tr|F1P0H9|F1P0H9_CHICK	R.GLP(+15.99)GAIGAP(+15.99)GPAGGAGDRGEGGPAGPAGPAGAR.G	Y	30.49	2724.33	33	2	1363.18	2	16.43		F27:215	4	675	707	Oxidation or Hydroxylation	P3:Oxidation or Hydroxylation:0.00;P9:Oxidation or Hydroxylation:0.00
3	20-H/Urea-D	Urea	20 mL/g	Solubilization	Dialysis	1	1	1	Collagen I, alpha 2	Collagen alpha-2(I) chain OS=Gallus gallus GN=COL1A2 PE=4 SV=1	tr|F1P0H9|F1P0H9_CHICK	K.GETGPAGPP(+15.99)GFQGLP(+15.99)GPSGPAGEAGKP(+15.99)GER.G	Y	38.58	2776.31	30	1.6	926.444	3	18.41		F27:268	1	543	572	Oxidation or Hydroxylation	P9:Oxidation or Hydroxylation:14.02;P15:Oxidation or Hydroxylation:26.31;P27:Oxidation or Hydroxylation:26.08
3	20-H/Urea-D	Urea	20 mL/g	Solubilization	Dialysis	1	1	1	Collagen I, alpha 2	Collagen alpha-2(I) chain OS=Gallus gallus GN=COL1A2 PE=4 SV=1	tr|F1P0H9|F1P0H9_CHICK	R.NGLP(+15.99)GPIGPAGVR.G	Y	25.03	1219.67	13	1.2	610.842	2	18.5		F27:271	3	1067	1079	Oxidation or Hydroxylation	P4:Oxidation or Hydroxylation:39.76
3	20-H/Urea-D	Urea	20 mL/g	Solubilization	Dialysis	1	1	1	Collagen I, alpha 2	Collagen alpha-2(I) chain OS=Gallus gallus GN=COL1A2 PE=4 SV=1	tr|F1P0H9|F1P0H9_CHICK	K.GETGPAGPPGF(+15.99)QGLP(+15.99)GPSGPAGEAGKPGER(+15.99).G	Y	37.93	2776.31	30	1.2	926.443	3	18.69		F27:277	1	543	572	Oxidation or Hydroxylation	F11:Oxidation or Hydroxylation:0.00;P15:Oxidation or Hydroxylation:26.31;R30:Oxidation or Hydroxylation:0.00
3	20-H/Urea-D	Urea	20 mL/g	Solubilization	Dialysis	1	1	1	Collagen I, alpha 2	Collagen alpha-2(I) chain OS=Gallus gallus GN=COL1A2 PE=4 SV=1	tr|F1P0H9|F1P0H9_CHICK	K.GAAGLP(+15.99)GVAGAP(+15.99)GLPGP(+15.99)R.G	Y	28.45	1561.82	18	1.2	781.919	2	19.29		F27:294	2	309	326	Oxidation or Hydroxylation	P6:Oxidation or Hydroxylation:106.84;P12:Oxidation or Hydroxylation:29.32;P17:Oxidation or Hydroxylation:0.00
3	20-H/Urea-D	Urea	20 mL/g	Solubilization	Dialysis	1	1	1	Collagen I, alpha 2	Collagen alpha-2(I) chain OS=Gallus gallus GN=COL1A2 PE=4 SV=1	tr|F1P0H9|F1P0H9_CHICK	K.GP(+15.99)KGETGPTGAIGPIGASGPP(+15.99)GPVGAAGPAGPR.G	Y	35.66	2836.45	33	1.5	946.491	3	19.61		F27:304	1	744	776	Oxidation or Hydroxylation	P2:Oxidation or Hydroxylation:0.00;P21:Oxidation or Hydroxylation:26.31
3	20-H/Urea-D	Urea	20 mL/g	Solubilization	Dialysis	1	1	1	Collagen I, alpha 2	Collagen alpha-2(I) chain OS=Gallus gallus GN=COL1A2 PE=4 SV=1	tr|F1P0H9|F1P0H9_CHICK	R.GLPGESGAVGPAGPIGSR.G	Y	29.82	1577.82	18	0.4	789.916	2	19.67		F27:306	1	591	608
3	20-H/Urea-D	Urea	20 mL/g	Solubilization	Dialysis	1	1	1	Collagen I, alpha 2	Collagen alpha-2(I) chain OS=Gallus gallus GN=COL1A2 PE=4 SV=1	tr|F1P0H9|F1P0H9_CHICK	R.GSDGSAGPTGPAGPIGAAGPP(+15.99)GFP(+15.99)GAP(+15.99)GAK.G	Y	31.95	2520.19	30	1.8	1261.1	2	20.66		F27:333	2	234	263	Oxidation or Hydroxylation	P21:Oxidation or Hydroxylation:14.02;P24:Oxidation or Hydroxylation:14.02;P27:Oxidation or Hydroxylation:33.81
3	20-H/Urea-D	Urea	20 mL/g	Solubilization	Dialysis	1	1	1	Collagen I, alpha 2	Collagen alpha-2(I) chain OS=Gallus gallus GN=COL1A2 PE=4 SV=1	tr|F1P0H9|F1P0H9_CHICK	K.GETGPTGAIGPIGASGPP(+15.99)GPVGAAGPAGPR.G	Y	31.91	2538.28	30	1.9	1270.15	2	21.69		F27:357	1	747	776	Oxidation or Hydroxylation	P18:Oxidation or Hydroxylation:17.01
3	20-H/Urea-D	Urea	20 mL/g	Solubilization	Dialysis	1	1	1	Collagen I, alpha 2	Collagen alpha-2(I) chain OS=Gallus gallus GN=COL1A2 PE=4 SV=1	tr|F1P0H9|F1P0H9_CHICK	R.GDPGPVGP(+15.99)VGPAGAFGPR.G	Y	31.66	1619.81	18	0.7	810.911	2	22.43		F27:377	1	978	995	Oxidation or Hydroxylation	P8:Oxidation or Hydroxylation:0.00
3	20-H/Urea-D	Urea	20 mL/g	Solubilization	Dialysis	1	1	1	Collagen I, alpha 2	Collagen alpha-2(I) chain OS=Gallus gallus GN=COL1A2 PE=4 SV=1	tr|F1P0H9|F1P0H9_CHICK	R.GLP(+15.99)GIAGATGEPGPLGVSGPP(+15.99)GAR.G	Y	33.19	2116.09	24	1.9	1059.05	2	23.69		F27:402	1	882	905	Oxidation or Hydroxylation	P3:Oxidation or Hydroxylation:106.84;P21:Oxidation or Hydroxylation:0.00
3	20-H/Urea-D	Urea	20 mL/g	Solubilization	Dialysis	1	1	1	Collagen I, alpha 2	Collagen alpha-2(I) chain OS=Gallus gallus GN=COL1A2 PE=4 SV=1	tr|F1P0H9|F1P0H9_CHICK	A.DFGPGPMGLMGPR.G	Y	30.43	1330.62	13	0.6	666.316	2	27.94		F27:469	1	86	98
3	20-H/Urea-D	Urea	20 mL/g	Solubilization	Dialysis	1	1	1	Collagen I, alpha 2	Collagen alpha-2(I) chain OS=Gallus gallus GN=COL1A2 PE=4 SV=1	tr|F1P0H9|F1P0H9_CHICK	R.TNKPSRLPILDIAPLDIGGADQEFGLHIGPVC(+57.02)FK	Y	37.92	3687.94	34	1.7	922.995	4	33.27		F27:530	1	1330	1363	Carbamidomethylation	C32:Carbamidomethylation:1000.00
3	20-H/Urea-D	Urea	20 mL/g	Solubilization	Dialysis	2	1	1	Collagen I, alpha 2	Collagen alpha-2(I) chain OS=Gallus gallus GN=COL1A2 PE=4 SV=1	tr|F1P0H9|F1P0H9_CHICK	R.GASGPVGAKGPN(+.98)GDAGR(+15.99)PGEP(+15.99)GLMGPR.G	Y	47.66	2491.19	27	0.9	623.805	4	14.52		F28:168	1	423	449	Deamidation (NQ); Oxidation or Hydroxylation	N12:Deamidation (NQ):1000.00;R17:Oxidation or Hydroxylation:0.00;P21:Oxidation or Hydroxylation:4.75
3	20-H/Urea-D	Urea	20 mL/g	Solubilization	Dialysis	2	1	1	Collagen I, alpha 2	Collagen alpha-2(I) chain OS=Gallus gallus GN=COL1A2 PE=4 SV=1	tr|F1P0H9|F1P0H9_CHICK	R.VGP(+15.99)P(+15.99)GPAGITGPP(+15.99)GPP(+15.99)GPAGK.D	Y	35.6	1840.93	21	1.4	921.475	2	15.77		F28:195	4	794	814	Oxidation or Hydroxylation	P3:Oxidation or Hydroxylation:28.36;P4:Oxidation or Hydroxylation:11.10;P13:Oxidation or Hydroxylation:14.02;P16:Oxidation or Hydroxylation:6.59
3	20-H/Urea-D	Urea	20 mL/g	Solubilization	Dialysis	2	1	1	Collagen I, alpha 2	Collagen alpha-2(I) chain OS=Gallus gallus GN=COL1A2 PE=4 SV=1	tr|F1P0H9|F1P0H9_CHICK	R.GLHGEFGVP(+15.99)GPAGPR.G	Y	51.98	1462.73	15	1.2	732.374	2	16.82		F28:222	2	573	587	Oxidation or Hydroxylation	P9:Oxidation or Hydroxylation:22.85
3	20-H/Urea-D	Urea	20 mL/g	Solubilization	Dialysis	2	1	1	Collagen I, alpha 2	Collagen alpha-2(I) chain OS=Gallus gallus GN=COL1A2 PE=4 SV=1	tr|F1P0H9|F1P0H9_CHICK	K.GEIGPAGNVGPTGPAGPR.G	Y	59.83	1602.81	18	1.1	802.414	2	16.84		F28:223	2	264	281
3	20-H/Urea-D	Urea	20 mL/g	Solubilization	Dialysis	2	1	1	Collagen I, alpha 2	Collagen alpha-2(I) chain OS=Gallus gallus GN=COL1A2 PE=4 SV=1	tr|F1P0H9|F1P0H9_CHICK	K.EGPVGFP(+15.99)GADGR.V	Y	46.41	1173.54	12	0.5	587.778	2	16.93		F28:226	2	464	475	Oxidation or Hydroxylation	P7:Oxidation or Hydroxylation:8.69
3	20-H/Urea-D	Urea	20 mL/g	Solubilization	Dialysis	2	1	1	Collagen I, alpha 2	Collagen alpha-2(I) chain OS=Gallus gallus GN=COL1A2 PE=4 SV=1	tr|F1P0H9|F1P0H9_CHICK	R.TGEQGIAGPP(+15.99)GFAGEK.G	Y	42.11	1530.73	16	1.3	766.374	2	17.6		F28:247	2	830	845	Oxidation or Hydroxylation	P10:Oxidation or Hydroxylation:5.99
3	20-H/Urea-D	Urea	20 mL/g	Solubilization	Dialysis	2	1	1	Collagen I, alpha 2	Collagen alpha-2(I) chain OS=Gallus gallus GN=COL1A2 PE=4 SV=1	tr|F1P0H9|F1P0H9_CHICK	R.GLP(+15.99)GESGAVGPAGPIGSR.G	Y	42.11	1593.81	18	1.6	797.914	2	17.97		F28:258	3	591	608	Oxidation or Hydroxylation	P3:Oxidation or Hydroxylation:89.48
3	20-H/Urea-D	Urea	20 mL/g	Solubilization	Dialysis	2	1	1	Collagen I, alpha 2	Collagen alpha-2(I) chain OS=Gallus gallus GN=COL1A2 PE=4 SV=1	tr|F1P0H9|F1P0H9_CHICK	R.GDAGPP(+15.99)GMTGFP(+15.99)GAAGR.V	Y	55.09	1546.68	17	0.9	774.35	2	18.1		F28:263	3	777	793	Oxidation or Hydroxylation	P6:Oxidation or Hydroxylation:10.11;P12:Oxidation or Hydroxylation:40.00
3	20-H/Urea-D	Urea	20 mL/g	Solubilization	Dialysis	2	1	1	Collagen I, alpha 2	Collagen alpha-2(I) chain OS=Gallus gallus GN=COL1A2 PE=4 SV=1	tr|F1P0H9|F1P0H9_CHICK	K.GETGPAGPPGF(+15.99)QGLP(+15.99)GPSGPAGEAGKP(+15.99)GER.G	Y	42.84	2776.31	30	1.6	926.444	3	18.29		F28:269	1	543	572	Oxidation or Hydroxylation	F11:Oxidation or Hydroxylation:0.00;P15:Oxidation or Hydroxylation:12.19;P27:Oxidation or Hydroxylation:0.00
3	20-H/Urea-D	Urea	20 mL/g	Solubilization	Dialysis	2	1	1	Collagen I, alpha 2	Collagen alpha-2(I) chain OS=Gallus gallus GN=COL1A2 PE=4 SV=1	tr|F1P0H9|F1P0H9_CHICK	K.GETGPAGPP(+15.99)GFQGLP(+15.99)GPSGPAGEAGKPGER(+15.99).G	Y	46.62	2776.31	30	1.2	926.443	3	18.55		F28:277	1	543	572	Oxidation or Hydroxylation	P9:Oxidation or Hydroxylation:12.28;P15:Oxidation or Hydroxylation:9.40;R30:Oxidation or Hydroxylation:0.00
3	20-H/Urea-D	Urea	20 mL/g	Solubilization	Dialysis	2	1	1	Collagen I, alpha 2	Collagen alpha-2(I) chain OS=Gallus gallus GN=COL1A2 PE=4 SV=1	tr|F1P0H9|F1P0H9_CHICK	R.VGPIGPAGNRGEP(+15.99)GNIGFPGPK(+15.99).G	Y	35.42	2119.08	22	1	707.368	3	18.57		F28:278	3	476	497	Oxidation or Hydroxylation	P13:Oxidation or Hydroxylation:0.00;K22:Oxidation or Hydroxylation:0.00
3	20-H/Urea-D	Urea	20 mL/g	Solubilization	Dialysis	2	1	1	Collagen I, alpha 2	Collagen alpha-2(I) chain OS=Gallus gallus GN=COL1A2 PE=4 SV=1	tr|F1P0H9|F1P0H9_CHICK	R.VGPIGPAGNRGEP(+15.99)GNIGFP(+15.99)GPK.G	Y	29.6	2119.08	22	1.1	707.368	3	18.89		F28:285	2	476	497	Oxidation or Hydroxylation	P13:Oxidation or Hydroxylation:0.00;P19:Oxidation or Hydroxylation:0.00
3	20-H/Urea-D	Urea	20 mL/g	Solubilization	Dialysis	2	1	1	Collagen I, alpha 2	Collagen alpha-2(I) chain OS=Gallus gallus GN=COL1A2 PE=4 SV=1	tr|F1P0H9|F1P0H9_CHICK	K.GAAGLP(+15.99)GVAGAP(+15.99)GLP(+15.99)GPR.G	Y	27.89	1561.82	18	1.3	781.919	2	19.22		F28:295	1	309	326	Oxidation or Hydroxylation	P6:Oxidation or Hydroxylation:73.38;P12:Oxidation or Hydroxylation:5.81;P15:Oxidation or Hydroxylation:0.00
3	20-H/Urea-D	Urea	20 mL/g	Solubilization	Dialysis	2	1	1	Collagen I, alpha 2	Collagen alpha-2(I) chain OS=Gallus gallus GN=COL1A2 PE=4 SV=1	tr|F1P0H9|F1P0H9_CHICK	K.GPK(+15.99)GETGPTGAIGPIGASGPP(+15.99)GPVGAAGPAGPR.G	Y	47.24	2836.45	33	1.4	946.491	3	19.27		F28:297	3	744	776	Oxidation or Hydroxylation	K3:Oxidation or Hydroxylation:0.00;P21:Oxidation or Hydroxylation:14.02
3	20-H/Urea-D	Urea	20 mL/g	Solubilization	Dialysis	2	1	1	Collagen I, alpha 2	Collagen alpha-2(I) chain OS=Gallus gallus GN=COL1A2 PE=4 SV=1	tr|F1P0H9|F1P0H9_CHICK	K.GAAGLP(+15.99)GVAGAP(+15.99)GLPGPR(+15.99).G	Y	27.72	1561.82	18	1.2	781.919	2	19.52		F28:303	1	309	326	Oxidation or Hydroxylation	P6:Oxidation or Hydroxylation:76.18;P12:Oxidation or Hydroxylation:12.33;R18:Oxidation or Hydroxylation:0.00
3	20-H/Urea-D	Urea	20 mL/g	Solubilization	Dialysis	2	1	1	Collagen I, alpha 2	Collagen alpha-2(I) chain OS=Gallus gallus GN=COL1A2 PE=4 SV=1	tr|F1P0H9|F1P0H9_CHICK	K.GPKGETGPTGAIGPIGASGPP(+15.99)GPVGAAGPAGPR.G	Y	45.91	2820.45	33	1	941.159	3	19.57		F28:305	2	744	776	Oxidation or Hydroxylation	P21:Oxidation or Hydroxylation:26.31
3	20-H/Urea-D	Urea	20 mL/g	Solubilization	Dialysis	2	1	1	Collagen I, alpha 2	Collagen alpha-2(I) chain OS=Gallus gallus GN=COL1A2 PE=4 SV=1	tr|F1P0H9|F1P0H9_CHICK	R.N(+.98)GLP(+15.99)GPIGPAGVR.G	Y	36.06	1220.65	13	0.7	611.333	2	20.91		F28:340	3	1067	1079	Deamidation (NQ); Oxidation or Hydroxylation	N1:Deamidation (NQ):1000.00;P4:Oxidation or Hydroxylation:39.76
3	20-H/Urea-D	Urea	20 mL/g	Solubilization	Dialysis	2	1	1	Collagen I, alpha 2	Collagen alpha-2(I) chain OS=Gallus gallus GN=COL1A2 PE=4 SV=1	tr|F1P0H9|F1P0H9_CHICK	K.AVILQGSNDVELR.A	Y	39.07	1412.76	13	0.9	707.389	2	21.04		F28:344	1	1286	1298
3	20-H/Urea-D	Urea	20 mL/g	Solubilization	Dialysis	2	1	1	Collagen I, alpha 2	Collagen alpha-2(I) chain OS=Gallus gallus GN=COL1A2 PE=4 SV=1	tr|F1P0H9|F1P0H9_CHICK	R.GDP(+15.99)GPVGPVGPAGAFGPR.G	Y	57.81	1619.81	18	0.8	810.911	2	22.01		F28:357	2	978	995	Oxidation or Hydroxylation	P3:Oxidation or Hydroxylation:17.01
3	20-H/Urea-D	Urea	20 mL/g	Solubilization	Dialysis	2	1	1	Collagen I, alpha 2	Collagen alpha-2(I) chain OS=Gallus gallus GN=COL1A2 PE=4 SV=1	tr|F1P0H9|F1P0H9_CHICK	R.GFP(+15.99)GTP(+15.99)GLPGFK(+15.99).G	Y	30.75	1221.6	12	0.6	611.809	2	22.33		F28:364	2	165	176	Oxidation or Hydroxylation	P3:Oxidation or Hydroxylation:17.01;P6:Oxidation or Hydroxylation:38.16;K12:Oxidation or Hydroxylation:7.77
3	20-H/Urea-D	Urea	20 mL/g	Solubilization	Dialysis	2	1	1	Collagen I, alpha 2	Collagen alpha-2(I) chain OS=Gallus gallus GN=COL1A2 PE=4 SV=1	tr|F1P0H9|F1P0H9_CHICK	R.GFP(+15.99)GTP(+15.99)GLP(+15.99)GFK.G	Y	32.09	1221.6	12	0.7	611.809	2	22.41		F28:367	2	165	176	Oxidation or Hydroxylation	P3:Oxidation or Hydroxylation:17.01;P6:Oxidation or Hydroxylation:30.64;P9:Oxidation or Hydroxylation:0.00
3	20-H/Urea-D	Urea	20 mL/g	Solubilization	Dialysis	2	1	1	Collagen I, alpha 2	Collagen alpha-2(I) chain OS=Gallus gallus GN=COL1A2 PE=4 SV=1	tr|F1P0H9|F1P0H9_CHICK	R.GDPGPVGPVGP(+15.99)AGAFGPR.G	Y	38.99	1619.81	18	0.9	810.911	2	22.47		F28:369	1	978	995	Oxidation or Hydroxylation	P11:Oxidation or Hydroxylation:0.00
3	20-H/Urea-D	Urea	20 mL/g	Solubilization	Dialysis	2	1	1	Collagen I, alpha 2	Collagen alpha-2(I) chain OS=Gallus gallus GN=COL1A2 PE=4 SV=1	tr|F1P0H9|F1P0H9_CHICK	R.GDPGPVGPVGPAGAFGPR(+31.99).G	Y	26.02	1635.8	18	-0.3	818.907	2	22.55		F28:371	2	978	995	Dihydroxy	R18:Dihydroxy:6.08
3	20-H/Urea-D	Urea	20 mL/g	Solubilization	Dialysis	2	1	1	Collagen I, alpha 2	Collagen alpha-2(I) chain OS=Gallus gallus GN=COL1A2 PE=4 SV=1	tr|F1P0H9|F1P0H9_CHICK	R.GLP(+15.99)GIAGATGEP(+15.99)GPLGVSGP(+15.99)PGAR.G	Y	38.58	2132.09	24	1.2	1067.05	2	22.62		F28:373	2	882	905	Oxidation or Hydroxylation	P3:Oxidation or Hydroxylation:81.27;P12:Oxidation or Hydroxylation:8.22;P20:Oxidation or Hydroxylation:0.00
3	20-H/Urea-D	Urea	20 mL/g	Solubilization	Dialysis	2	1	1	Collagen I, alpha 2	Collagen alpha-2(I) chain OS=Gallus gallus GN=COL1A2 PE=4 SV=1	tr|F1P0H9|F1P0H9_CHICK	R.GDPGPVGPVGPAGAFGPR.G	Y	49.07	1603.81	18	1.4	802.914	2	22.68		F28:375	4	978	995
3	20-H/Urea-D	Urea	20 mL/g	Solubilization	Dialysis	2	1	1	Collagen I, alpha 2	Collagen alpha-2(I) chain OS=Gallus gallus GN=COL1A2 PE=4 SV=1	tr|F1P0H9|F1P0H9_CHICK	R.GLP(+15.99)GIAGATGEP(+15.99)GPLGVSGPPGAR(+15.99).G	Y	37.47	2132.09	24	1.4	1067.05	2	22.71		F28:376	2	882	905	Oxidation or Hydroxylation	P3:Oxidation or Hydroxylation:122.88;P12:Oxidation or Hydroxylation:9.40;R24:Oxidation or Hydroxylation:6.65
3	20-H/Urea-D	Urea	20 mL/g	Solubilization	Dialysis	2	1	1	Collagen I, alpha 2	Collagen alpha-2(I) chain OS=Gallus gallus GN=COL1A2 PE=4 SV=1	tr|F1P0H9|F1P0H9_CHICK	R.GLP(+15.99)GIAGATGEPGPLGVSGPPGAR(+15.99).G	Y	23.52	2116.09	24	2	1059.06	2	23.85		F28:395	1	882	905	Oxidation or Hydroxylation	P3:Oxidation or Hydroxylation:46.57;R24:Oxidation or Hydroxylation:0.00
3	20-H/Urea-D	Urea	20 mL/g	Solubilization	Dialysis	2	1	1	Collagen I, alpha 2	Collagen alpha-2(I) chain OS=Gallus gallus GN=COL1A2 PE=4 SV=1	tr|F1P0H9|F1P0H9_CHICK	K.AADFGPGPMGLMGPR.G	Y	38.03	1472.69	15	1.3	737.354	2	26.8		F28:429	2	84	98
3	20-H/Urea-D	Urea	20 mL/g	Solubilization	Dialysis	2	1	1	Collagen I, alpha 2	Collagen alpha-2(I) chain OS=Gallus gallus GN=COL1A2 PE=4 SV=1	tr|F1P0H9|F1P0H9_CHICK	K.AADFGPGPM(+15.99)GLM(+15.99)GPR.G	Y	25.88	1504.68	15	1.2	753.348	2	26.83		F28:430	1	84	98	Oxidation (M)	M9:Oxidation (M):1000.00;M12:Oxidation (M):1000.00
3	20-H/Urea-D	Urea	20 mL/g	Solubilization	Dialysis	2	1	1	Collagen I, alpha 2	Collagen alpha-2(I) chain OS=Gallus gallus GN=COL1A2 PE=4 SV=1	tr|F1P0H9|F1P0H9_CHICK	K.AADFGPGPM(+15.99)GLMGPR.G	Y	37.13	1488.69	15	1	745.351	2	26.92		F28:433	1	84	98	Oxidation (M)	M9:Oxidation (M):28.73
3	20-H/Urea-D	Urea	20 mL/g	Solubilization	Dialysis	2	1	1	Collagen I, alpha 2	Collagen alpha-2(I) chain OS=Gallus gallus GN=COL1A2 PE=4 SV=1	tr|F1P0H9|F1P0H9_CHICK	K.TLNNQIETLLTPEGSK.K	Y	31.33	1756.92	16	1.4	879.469	2	28.04		F28:451	1	1136	1151
3	20-H/Urea-D	Urea	20 mL/g	Solubilization	Dialysis	1	4	67	Collagen II, alpha 1	Collagen alpha-1(II) chain (Fragment) OS=Gallus gallus GN=COL2A1 PE=4 SV=2	tr|H9L2B7|H9L2B7_CHICK	R.GAPGERGEPGM(sub A)PGPAGFAGPP(+15.99)GADGQPGAK(+15.99).G	Y	21.35	2718.25	30	-6.1	907.084	3	15		F27:176	1	640	669	Oxidation or Hydroxylation; Mutation	P21:Oxidation or Hydroxylation:19.27;K30:Oxidation or Hydroxylation:53.33
3	20-H/Urea-D	Urea	20 mL/g	Solubilization	Dialysis	2	4	67	Collagen II, alpha 1	Collagen alpha-1(II) chain (Fragment) OS=Gallus gallus GN=COL2A1 PE=4 SV=2	tr|H9L2B7|H9L2B7_CHICK	R.GAPGERGEPGM(sub A)PGPAGFAGPP(+15.99)GADGQP(+15.99)GAK.G	Y	22.13	2718.25	30	-5.3	907.084	3	14.76		F28:174	1	640	669	Oxidation or Hydroxylation; Mutation	P21:Oxidation or Hydroxylation:11.06;P27:Oxidation or Hydroxylation:0.00
3	20-H/Urea-D	Urea	20 mL/g	Solubilization	Dialysis	2	4	67	Collagen II, alpha 1	Collagen alpha-1(II) chain (Fragment) OS=Gallus gallus GN=COL2A1 PE=4 SV=2	tr|H9L2B7|H9L2B7_CHICK	R.GFP(+15.99)GLP(+15.99)GPSGEP(+15.99)GK.Q	N	29.07	1343.64	14	1.1	672.826	2	18.6		F28:279	1	814	827	Oxidation or Hydroxylation	P3:Oxidation or Hydroxylation:7.65;P6:Oxidation or Hydroxylation:32.28;P12:Oxidation or Hydroxylation:0.00
3	20-H/Urea-D	Urea	20 mL/g	Solubilization	Dialysis	2	4	67	Collagen II, alpha 1	Collagen alpha-1(II) chain (Fragment) OS=Gallus gallus GN=COL2A1 PE=4 SV=2	tr|H9L2B7|H9L2B7_CHICK	R.GFP(+15.99)GLP(+15.99)GPSGEPGK.Q	N	42.47	1327.64	14	1	664.828	2	19.3		F28:298	4	814	827	Oxidation or Hydroxylation	P3:Oxidation or Hydroxylation:17.01;P6:Oxidation or Hydroxylation:33.18
3	20-H/Urea-D	Urea	20 mL/g	Solubilization	Dialysis	1	5	85	Collagen IV, alpha 6	Uncharacterized protein OS=Gallus gallus GN=COL4A6 PE=4 SV=2	tr|F1P3T8|F1P3T8_CHICK	R.GDVGPPGLPVLGAQ(+.98)EQA.L	Y	20.85	1604.8	17	6.9	803.415	2	22.49		F27:379	1	957	973	Deamidation (NQ)	Q14:Deamidation (NQ):0.00
3	20-H/Urea-D	Urea	20 mL/g	Solubilization	Dialysis	2	5	85	Collagen IV, alpha 6	Uncharacterized protein OS=Gallus gallus GN=COL4A6 PE=4 SV=2	tr|F1P3T8|F1P3T8_CHICK	R.GDVGPPGLPVLGAQEQ(+.98)A.L	Y	25.36	1604.8	17	6.8	803.415	2	22.44		F28:368	3	957	973	Deamidation (NQ)	Q16:Deamidation (NQ):0.00
3	20-H/Urea-D	Urea	20 mL/g	Solubilization	Dialysis	1	10	10	Decorin	Decorin OS=Gallus gallus GN=DCN PE=1 SV=1	P28675|PGS2_CHICK	K.IDAEGLSGLTNLAK.L	Y	37.28	1400.75	14	1.1	701.384	2	26.39		F27:448	1	234	247
3	20-H/Urea-D	Urea	20 mL/g	Solubilization	Dialysis	1	11	7877	Hemoglobin B	Hemoglobin subunit beta OS=Gallus gallus GN=HBB PE=1 SV=2	P02112|HBB_CHICK	R.LLIVYPWTQR.F	Y	22.63	1287.73	10	1.2	644.875	2	30.16		F27:493	1	32	41
3	20-H/Urea-D	Urea	20 mL/g	Solubilization	Dialysis	1	12	116	Histone-lysine n-methyltransferase	Histone-lysine N-methyltransferase OS=Gallus gallus GN=MLL3 PE=4 SV=2	tr|F1NW66|F1NW66_CHICK	F.GKDLLDTSRQNK.M	Y	16.8	1373.73	12	-1.8	687.869	2	21.35		F27:351	1	1380	1391
3	20-H/Urea-D	Urea	20 mL/g	Solubilization	Dialysis	1	12	116	Histone-lysine n-methyltransferase	Histone-lysine N-methyltransferase OS=Gallus gallus GN=MLL3 PE=4 SV=2	tr|F1NW66|F1NW66_CHICK	D.ISEGR.D	Y	16.29	560.292	5	-9.3	561.294	1	45.69		F27:632	1	873	877
3	20-H/Urea-D	Urea	20 mL/g	Solubilization	Dialysis	1	9	35	Lumican	Lumican OS=Gallus gallus GN=LUM PE=1 SV=1	P51890|LUM_CHICK	R.ADLPQEMYNC(+57.02)LR.V	Y	35.43	1508.68	12	1.4	755.346	2	25.77		F27:437	1	324	335	Carbamidomethylation	C10:Carbamidomethylation:1000.00
3	20-H/Urea-D	Urea	20 mL/g	Solubilization	Dialysis	2	8	19	Pigment Epithelium Derived Factor	Uncharacterized protein OS=Gallus gallus GN=SERPINF1 PE=3 SV=1	tr|E1C7H6|E1C7H6_CHICK	R.DDTTGTLLFIGK.I	Y	37.1	1279.67	12	0.6	640.841	2	27.96		F28:449	1	403	414
3	20-H/Urea-D	Urea	20 mL/g	Solubilization	Dialysis	1	7	3	Serum Albumin	Serum albumin OS=Gallus gallus GN=ALB PE=1 SV=2	P19121|ALBU_CHICK	R.SQC(+57.02)IM(+15.99)EAEFDEKPADLPSLVEK.Y	Y	16.59	2551.18	22	0.7	851.402	3	24.52		F27:419	1	315	336	Carbamidomethylation; Oxidation (M)	C3:Carbamidomethylation:1000.00;M5:Oxidation (M):1000.00
3	20-H/Urea-D	Urea	20 mL/g	Solubilization	Dialysis	1	7	3	Serum Albumin	Serum albumin OS=Gallus gallus GN=ALB PE=1 SV=2	P19121|ALBU_CHICK	K.YVPPPFNPDMFSFDEK.L	Y	18.16	1928.87	16	1.2	965.441	2	31.77		F27:509	1	525	540
3	20-H/Urea-D	Urea	20 mL/g	Solubilization	Dialysis	1	7	2	Serum Albumin	Serum albumin OS=Gallus gallus GN=ALB PE=4 SV=2	tr|F2Z4L6|F2Z4L6_CHICK	R.RHPFLYAPAILSFAVDFEHALQSCC(+57.02)K(+57.02).E	Y	17.41	3076.51	26	0.5	770.134	4	38.34		F27:573	1	123	148	Carbamidomethylation; Carbamidomethylation (DHKE X@N-term)	C25:Carbamidomethylation:1000.00;K26:Carbamidomethylation (DHKE X@N-term):0.00
3	20-H/Urea-D	Urea	20 mL/g	Solubilization	Dialysis	2	7	2	Serum Albumin	Serum albumin OS=Gallus gallus GN=ALB PE=4 SV=2	tr|F2Z4L6|F2Z4L6_CHICK	R.KQETTPINDNVSQC(+57.02)C(+57.02)SSSYANR.R	Y	15.85	2558.11	22	2	853.713	3	14.67		F28:172	1	441	462	Carbamidomethylation	C14:Carbamidomethylation:1000.00;C15:Carbamidomethylation:1000.00
3	20-H/Urea-D	Urea	20 mL/g	Solubilization	Dialysis	2	7	3	Serum Albumin	Serum albumin OS=Gallus gallus GN=ALB PE=1 SV=2	P19121|ALBU_CHICK	K.QQYFC(+57.02)GILK.Q	Y	31.85	1155.57	9	1	578.795	2	24.46		F28:402	2	224	232	Carbamidomethylation	C5:Carbamidomethylation:1000.00
4	20-HCl-D	HCl	20 mL/g	Demineralization	Dialysis	2	30	56	12K Serum	12K serum protein beta-2-m cross-reactive (Fragment) OS=Gallus gallus PE=1 SV=1	tr|Q7LZS1|Q7LZS1_CHICK	K.GC(+57.02)MLDGVLYPFGEIPR.T	Y	39.41	1822.87	16	1.5	912.446	2	33.28		F6:624	2	15	30	Carbamidomethylation	C2:Carbamidomethylation:1000.00
4	20-HCl-D	HCl	20 mL/g	Demineralization	Dialysis	1	3	7	Alpha-2-HS-glycoprotein	Uncharacterized protein OS=Gallus gallus GN=AHSG PE=4 SV=1	tr|E1BZE1|E1BZE1_CHICK	R.FALNRIEQVR.V	Y	29.38	1244.7	10	0.7	623.357	2	20.13		F5:291	1	55	64
4	20-HCl-D	HCl	20 mL/g	Demineralization	Dialysis	1	3	7	Alpha-2-HS-glycoprotein	Uncharacterized protein OS=Gallus gallus GN=AHSG PE=4 SV=1	tr|E1BZE1|E1BZE1_CHICK	R.AAAEVAQHDKVPHPVGFVPPPPLCPGK(+57.02).I	Y	26.06	2814.46	27	0.3	563.9	5	20.4		F5:300	3	312	338	Carbamidomethylation (DHKE X@N-term)	K27:Carbamidomethylation (DHKE X@N-term):99.63
4	20-HCl-D	HCl	20 mL/g	Demineralization	Dialysis	1	3	7	Alpha-2-HS-glycoprotein	Uncharacterized protein OS=Gallus gallus GN=AHSG PE=4 SV=1	tr|E1BZE1|E1BZE1_CHICK	R.AAAEVAQHDKVPHPVGFVPPPPLC(+57.02)PGK.I	Y	49.1	2814.46	27	1	939.163	3	20.58		F5:306	7	312	338	Carbamidomethylation	C24:Carbamidomethylation:1000.00
4	20-HCl-D	HCl	20 mL/g	Demineralization	Dialysis	1	3	7	Alpha-2-HS-glycoprotein	Uncharacterized protein OS=Gallus gallus GN=AHSG PE=4 SV=1	tr|E1BZE1|E1BZE1_CHICK	K.MVTEPSQDLIAEC(+57.02)QLYGHQPGVTYPHPGQDTSAGLVPSAGQGFTNHNLK.I	Y	28.94	5246.48	49	1.3	1050.31	5	24.8		F5:426	1	235	283	Carbamidomethylation	C13:Carbamidomethylation:1000.00
4	20-HCl-D	HCl	20 mL/g	Demineralization	Dialysis	1	3	7	Alpha-2-HS-glycoprotein	Uncharacterized protein OS=Gallus gallus GN=AHSG PE=4 SV=1	tr|E1BZE1|E1BZE1_CHICK	K.ISHNNPVASES(+79.97)SSSEFPSLLSAK.S	Y	51.15	2467.13	23	0.9	823.384	3	25.58		F5:447	1	284	306	Phosphorylation (STY)	S11:Phosphorylation (STY):26.02
4	20-HCl-D	HCl	20 mL/g	Demineralization	Dialysis	1	3	7	Alpha-2-HS-glycoprotein	Uncharacterized protein OS=Gallus gallus GN=AHSG PE=4 SV=1	tr|E1BZE1|E1BZE1_CHICK	K.VN(-17.03)GQFSVLASK.C	Y	50.59	1131.59	11	1.3	566.804	2	26.42		F5:469	2	118	128	Ammonia-loss (N)	N2:Ammonia-loss (N):1000.00
4	20-HCl-D	HCl	20 mL/g	Demineralization	Dialysis	1	3	7	Alpha-2-HS-glycoprotein	Uncharacterized protein OS=Gallus gallus GN=AHSG PE=4 SV=1	tr|E1BZE1|E1BZE1_CHICK	K.DNLAAC(+57.02)QLLPEDQSNFGFCTAK(+57.02).M	Y	32.08	2498.12	22	2.2	1250.07	2	28.29		F5:511	1	213	234	Carbamidomethylation; Carbamidomethylation (DHKE X@N-term)	C6:Carbamidomethylation:1000.00;K22:Carbamidomethylation (DHKE X@N-term):32.47
4	20-HCl-D	HCl	20 mL/g	Demineralization	Dialysis	1	3	7	Alpha-2-HS-glycoprotein	Uncharacterized protein OS=Gallus gallus GN=AHSG PE=4 SV=1	tr|E1BZE1|E1BZE1_CHICK	K.NPDVYLM(+15.99)LLEIGR.A	Y	48.05	1547.8	13	0.5	774.909	2	32.63		F5:582	4	172	184	Oxidation (M)	M7:Oxidation (M):1000.00
4	20-HCl-D	HCl	20 mL/g	Demineralization	Dialysis	1	3	7	Alpha-2-HS-glycoprotein	Uncharacterized protein OS=Gallus gallus GN=AHSG PE=4 SV=1	tr|E1BZE1|E1BZE1_CHICK	P.AAPPPPLGC(+57.02)DDPEIEAAAEFAVIYIN(+.98)GHSHHGYR.F	Y	45.12	3671.71	34	6.8	735.354	5	33.76		F5:607	1	21	54	Carbamidomethylation; Deamidation (NQ)	C9:Carbamidomethylation:1000.00;N26:Deamidation (NQ):1000.00
4	20-HCl-D	HCl	20 mL/g	Demineralization	Dialysis	1	3	7	Alpha-2-HS-glycoprotein	Uncharacterized protein OS=Gallus gallus GN=AHSG PE=4 SV=1	tr|E1BZE1|E1BZE1_CHICK	K.NPDVY(+15.99)LM(+15.99)LLEIGR.A	Y	38.13	1563.8	13	0.5	782.906	2	35.52		F5:631	1	172	184	Oxidation or Hydroxylation; Oxidation (M)	Y5:Oxidation or Hydroxylation:32.97;M7:Oxidation (M):1000.00
4	20-HCl-D	HCl	20 mL/g	Demineralization	Dialysis	2	3	7	Alpha-2-HS-glycoprotein	Uncharacterized protein OS=Gallus gallus GN=AHSG PE=4 SV=1	tr|E1BZE1|E1BZE1_CHICK	R.TFAEHAVEGDC(+57.02)DVK.L	Y	47.73	1576.68	14	1.1	789.35	2	14.43		F6:136	4	101	114	Carbamidomethylation	C11:Carbamidomethylation:1000.00
4	20-HCl-D	HCl	20 mL/g	Demineralization	Dialysis	2	3	7	Alpha-2-HS-glycoprotein	Uncharacterized protein OS=Gallus gallus GN=AHSG PE=4 SV=1	tr|E1BZE1|E1BZE1_CHICK	K.VNGQFSVLASK.C	Y	46.72	1148.62	11	0.4	575.317	2	19.85		F6:298	4	118	128
4	20-HCl-D	HCl	20 mL/g	Demineralization	Dialysis	2	3	7	Alpha-2-HS-glycoprotein	Uncharacterized protein OS=Gallus gallus GN=AHSG PE=4 SV=1	tr|E1BZE1|E1BZE1_CHICK	K.VNGQF(+15.99)SVLASK.C	Y	23.54	1164.61	11	1.9	583.315	2	20.06		F6:305	1	118	128	Oxidation or Hydroxylation	F5:Oxidation or Hydroxylation:21.90
4	20-HCl-D	HCl	20 mL/g	Demineralization	Dialysis	2	3	7	Alpha-2-HS-glycoprotein	Uncharacterized protein OS=Gallus gallus GN=AHSG PE=4 SV=1	tr|E1BZE1|E1BZE1_CHICK	K.VN(+.98)GQFSVLASK.C	Y	45.12	1149.6	11	0.9	575.809	2	20.72		F6:325	4	118	128	Deamidation (NQ)	N2:Deamidation (NQ):32.28
4	20-HCl-D	HCl	20 mL/g	Demineralization	Dialysis	2	3	7	Alpha-2-HS-glycoprotein	Uncharacterized protein OS=Gallus gallus GN=AHSG PE=4 SV=1	tr|E1BZE1|E1BZE1_CHICK	K.T(sub V)NGQFSVLASK.C	Y	37.22	1150.6	11	7.9	576.311	2	20.83		F6:329	1	118	128	Mutation
4	20-HCl-D	HCl	20 mL/g	Demineralization	Dialysis	2	3	7	Alpha-2-HS-glycoprotein	Uncharacterized protein OS=Gallus gallus GN=AHSG PE=4 SV=1	tr|E1BZE1|E1BZE1_CHICK	K.VN(+.98)GQF(+15.99)SVLASK.C	Y	25.98	1165.6	11	1.1	583.807	2	20.85		F6:330	1	118	128	Deamidation (NQ); Oxidation or Hydroxylation	N2:Deamidation (NQ):0.00;F5:Oxidation or Hydroxylation:71.27
4	20-HCl-D	HCl	20 mL/g	Demineralization	Dialysis	2	3	7	Alpha-2-HS-glycoprotein	Uncharacterized protein OS=Gallus gallus GN=AHSG PE=4 SV=1	tr|E1BZE1|E1BZE1_CHICK	K.VPHPVGFVPPPPLCPGK(+57.02).I	Y	26.22	1793.96	17	1.1	598.996	3	23.02		F6:395	1	322	338	Carbamidomethylation (DHKE X@N-term)	K17:Carbamidomethylation (DHKE X@N-term):67.56
4	20-HCl-D	HCl	20 mL/g	Demineralization	Dialysis	2	3	7	Alpha-2-HS-glycoprotein	Uncharacterized protein OS=Gallus gallus GN=AHSG PE=4 SV=1	tr|E1BZE1|E1BZE1_CHICK	L.KISHNNPVAS(+79.97)ESSSSEFPSLLSAK.S	Y	23.68	2595.22	24	0.3	866.081	3	23.55		F6:410	1	283	306	Phosphorylation (STY)	S10:Phosphorylation (STY):0.00
4	20-HCl-D	HCl	20 mL/g	Demineralization	Dialysis	2	3	7	Alpha-2-HS-glycoprotein	Uncharacterized protein OS=Gallus gallus GN=AHSG PE=4 SV=1	tr|E1BZE1|E1BZE1_CHICK	K.M(+15.99)VTEPSQDLIAEC(+57.02)QLYGHQPGVTYPHPGQDTSAGLVPSAGQGFTNHNLK.I	Y	29.36	5262.48	49	3.4	878.09	6	24.47		F6:438	4	235	283	Oxidation (M); Carbamidomethylation	M1:Oxidation (M):1000.00;C13:Carbamidomethylation:1000.00
4	20-HCl-D	HCl	20 mL/g	Demineralization	Dialysis	2	3	7	Alpha-2-HS-glycoprotein	Uncharacterized protein OS=Gallus gallus GN=AHSG PE=4 SV=1	tr|E1BZE1|E1BZE1_CHICK	K.MVTEPSQDLIAEC(+57.02)QLYGHQPGVTYPHPGQDTSAGLVPSAGQGFTN(+.98)HNLK.I	Y	22.15	5247.47	49	2.5	1312.88	4	25.08		F6:457	1	235	283	Carbamidomethylation; Deamidation (NQ)	C13:Carbamidomethylation:1000.00;N45:Deamidation (NQ):49.37
4	20-HCl-D	HCl	20 mL/g	Demineralization	Dialysis	2	3	7	Alpha-2-HS-glycoprotein	Uncharacterized protein OS=Gallus gallus GN=AHSG PE=4 SV=1	tr|E1BZE1|E1BZE1_CHICK	K.ISHNNPVAS(+79.97)ES(+79.97)SSSEFPSLLSAK.S	Y	49.84	2547.09	23	-0.1	1274.55	2	27.43		F6:517	1	284	306	Phosphorylation (STY)	S9:Phosphorylation (STY):12.33;S11:Phosphorylation (STY):0.00
4	20-HCl-D	HCl	20 mL/g	Demineralization	Dialysis	2	3	7	Alpha-2-HS-glycoprotein	Uncharacterized protein OS=Gallus gallus GN=AHSG PE=4 SV=1	tr|E1BZE1|E1BZE1_CHICK	K.DNLAAC(+57.02)QLLPEDQSNFGFC(+57.02)TAK.M	Y	42.41	2498.12	22	1.2	833.715	3	28.2		F6:532	10	213	234	Carbamidomethylation	C6:Carbamidomethylation:1000.00;C19:Carbamidomethylation:1000.00
4	20-HCl-D	HCl	20 mL/g	Demineralization	Dialysis	2	3	7	Alpha-2-HS-glycoprotein	Uncharacterized protein OS=Gallus gallus GN=AHSG PE=4 SV=1	tr|E1BZE1|E1BZE1_CHICK	A.APAAPPPPLGC(+57.02)DDPEIEAAAEFAVIYIN(+.98)GHSHHGYR.F	Y	48.55	3839.8	36	-1.9	768.966	5	32.23		F6:602	4	19	54	Carbamidomethylation; Deamidation (NQ)	C11:Carbamidomethylation:1000.00;N28:Deamidation (NQ):1000.00
4	20-HCl-D	HCl	20 mL/g	Demineralization	Dialysis	2	3	7	Alpha-2-HS-glycoprotein	Uncharacterized protein OS=Gallus gallus GN=AHSG PE=4 SV=1	tr|E1BZE1|E1BZE1_CHICK	A.APAAPPPPLGC(+57.02)DDPEIEAAAEFAVIYINGHSHHGYR.F	Y	64.45	3838.82	36	-0.4	768.77	5	33.33		F6:625	2	19	54	Carbamidomethylation	C11:Carbamidomethylation:1000.00
4	20-HCl-D	HCl	20 mL/g	Demineralization	Dialysis	2	3	7	Alpha-2-HS-glycoprotein	Uncharacterized protein OS=Gallus gallus GN=AHSG PE=4 SV=1	tr|E1BZE1|E1BZE1_CHICK	K.NPDVYLMLLEIGR.A	Y	45.33	1531.81	13	0.5	766.911	2	35.22		F6:658	8	172	184
4	20-HCl-D	HCl	20 mL/g	Demineralization	Dialysis	2	3	7	Alpha-2-HS-glycoprotein	Uncharacterized protein OS=Gallus gallus GN=AHSG PE=4 SV=1	tr|E1BZE1|E1BZE1_CHICK	A.P(+57.02)(+15.99)AAPPPPLGC(+57.02)DDPEIEAAAEFAVIYINGHSHHGYR.F	Y	17.06	3840.8	35	6.1	769.171	5	38.68		F6:698	1	20	54	Carbamidomethylation (DHKE X@N-term); Oxidation or Hydroxylation; Carbamidomethylation	P1:Carbamidomethylation (DHKE X@N-term):67.24;P1:Oxidation or Hydroxylation:12.33;C10:Carbamidomethylation:1000.00
4	20-HCl-D	HCl	20 mL/g	Demineralization	Dialysis	1	6	6	Apolipoprotein	Apolipoprotein A-I OS=Gallus gallus GN=APOA1 PE=1 SV=2	P08250|APOA1_CHICK	K.VM(+15.99)EQLSNLR.E	Y	32.83	1104.56	9	0.6	553.288	2	16.18		F5:168	2	219	227	Oxidation (M)	M2:Oxidation (M):1000.00
4	20-HCl-D	HCl	20 mL/g	Demineralization	Dialysis	1	6	6	Apolipoprotein	Apolipoprotein A-I OS=Gallus gallus GN=APOA1 PE=1 SV=2	P08250|APOA1_CHICK	R.LTPYAENLK.N	Y	34.69	1047.56	9	0.4	524.788	2	17.53		F5:208	1	241	249
4	20-HCl-D	HCl	20 mL/g	Demineralization	Dialysis	1	6	6	Apolipoprotein	Apolipoprotein A-I OS=Gallus gallus GN=APOA1 PE=1 SV=2	P08250|APOA1_CHICK	K.WTEELEQYR.Q	Y	40.34	1252.57	9	0.6	627.294	2	20.84		F5:314	3	131	139
4	20-HCl-D	HCl	20 mL/g	Demineralization	Dialysis	1	6	6	Apolipoprotein	Apolipoprotein A-I OS=Gallus gallus GN=APOA1 PE=1 SV=2	P08250|APOA1_CHICK	K.M(+15.99)TPLVQEFR.E	Y	38.12	1135.57	9	0.9	568.793	2	21.16		F5:322	3	230	238	Oxidation (M)	M1:Oxidation (M):1000.00
4	20-HCl-D	HCl	20 mL/g	Demineralization	Dialysis	1	6	6	Apolipoprotein	Apolipoprotein A-I OS=Gallus gallus GN=APOA1 PE=1 SV=2	P08250|APOA1_CHICK	R.IRDM(+15.99)VDVYLETVK.A	Y	46.15	1595.82	13	0.9	798.919	2	22.48		F5:357	5	34	46	Oxidation (M)	M4:Oxidation (M):1000.00
4	20-HCl-D	HCl	20 mL/g	Demineralization	Dialysis	1	6	6	Apolipoprotein	Apolipoprotein A-I OS=Gallus gallus GN=APOA1 PE=1 SV=2	P08250|APOA1_CHICK	R.IRDM(+15.99)VDVYL.E	Y	24.29	1138.57	9	0.2	570.292	2	24.4		F5:414	2	34	42	Oxidation (M)	M4:Oxidation (M):1000.00
4	20-HCl-D	HCl	20 mL/g	Demineralization	Dialysis	1	6	6	Apolipoprotein	Apolipoprotein A-I OS=Gallus gallus GN=APOA1 PE=1 SV=2	P08250|APOA1_CHICK	R.LTPVAQELKELTK.Q	Y	43.35	1468.85	13	1	735.433	2	25.65		F5:449	1	142	154
4	20-HCl-D	HCl	20 mL/g	Demineralization	Dialysis	1	6	6	Apolipoprotein	Apolipoprotein A-I OS=Gallus gallus GN=APOA1 PE=1 SV=2	P08250|APOA1_CHICK	K.MTPLVQEF.R	Y	15	963.473	8	0.9	964.482	1	29.86		F5:542	1	230	237
4	20-HCl-D	HCl	20 mL/g	Demineralization	Dialysis	1	6	6	Apolipoprotein	Apolipoprotein A-I OS=Gallus gallus GN=APOA1 PE=1 SV=2	P08250|APOA1_CHICK	R.LISFLDELQK.S	Y	43.28	1204.67	10	0.7	603.343	2	30.57		F5:555	4	252	261
4	20-HCl-D	HCl	20 mL/g	Demineralization	Dialysis	2	6	6	Apolipoprotein	Apolipoprotein A-I OS=Gallus gallus GN=APOA1 PE=1 SV=2	P08250|APOA1_CHICK	R.AELTKDLEEVKEK.I	Y	44.63	1530.81	13	0.7	511.279	3	16.13		F6:182	2	107	119
4	20-HCl-D	HCl	20 mL/g	Demineralization	Dialysis	2	6	6	Apolipoprotein	Apolipoprotein A-I OS=Gallus gallus GN=APOA1 PE=1 SV=2	P08250|APOA1_CHICK	L.KLADNLDTLSAAAAK.L	Y	42.62	1500.81	15	1.1	751.415	2	19.96		F6:302	1	68	82
4	20-HCl-D	HCl	20 mL/g	Demineralization	Dialysis	2	6	6	Apolipoprotein	Apolipoprotein A-I OS=Gallus gallus GN=APOA1 PE=1 SV=2	P08250|APOA1_CHICK	R.EM(+15.99)WLKDTEALR.A	Y	38.07	1406.69	11	0	469.903	3	20.91		F6:332	2	96	106	Oxidation (M)	M2:Oxidation (M):1000.00
4	20-HCl-D	HCl	20 mL/g	Demineralization	Dialysis	2	6	6	Apolipoprotein	Apolipoprotein A-I OS=Gallus gallus GN=APOA1 PE=1 SV=2	P08250|APOA1_CHICK	K.LADNLDTLSAAAAK.L	Y	46.36	1372.72	14	0.7	687.368	2	21.24		F6:343	4	69	82
4	20-HCl-D	HCl	20 mL/g	Demineralization	Dialysis	2	6	6	Apolipoprotein	Apolipoprotein A-I OS=Gallus gallus GN=APOA1 PE=1 SV=2	P08250|APOA1_CHICK	K.ASGKDAIAQFESSAVGK.Q	Y	48.81	1664.84	17	1.3	833.427	2	21.27		F6:344	4	47	63
4	20-HCl-D	HCl	20 mL/g	Demineralization	Dialysis	2	6	6	Apolipoprotein	Apolipoprotein A-I OS=Gallus gallus GN=APOA1 PE=1 SV=2	P08250|APOA1_CHICK	K.IRPFLDQFSAK.W	Y	42.96	1320.72	11	0.5	441.247	3	23.81		F6:417	5	120	130
4	20-HCl-D	HCl	20 mL/g	Demineralization	Dialysis	2	6	6	Apolipoprotein	Apolipoprotein A-I OS=Gallus gallus GN=APOA1 PE=1 SV=2	P08250|APOA1_CHICK	K.MTPLVQEFR.E	Y	40.1	1119.57	9	0.6	560.795	2	23.97		F6:422	1	230	238
4	20-HCl-D	HCl	20 mL/g	Demineralization	Dialysis	2	6	6	Apolipoprotein	Apolipoprotein A-I OS=Gallus gallus GN=APOA1 PE=1 SV=2	P08250|APOA1_CHICK	K.DAIAQFESSAVGK.Q	Y	39.05	1321.65	13	1	661.834	2	24.09		F6:426	2	51	63
4	20-HCl-D	HCl	20 mL/g	Demineralization	Dialysis	2	6	6	Apolipoprotein	Apolipoprotein A-I OS=Gallus gallus GN=APOA1 PE=1 SV=2	P08250|APOA1_CHICK	R.EM(+15.99)WLKDTEALRAELTK.D	Y	26.41	1948.99	16	0.9	650.672	3	26.19		F6:484	1	96	111	Oxidation (M)	M2:Oxidation (M):1000.00
4	20-HCl-D	HCl	20 mL/g	Demineralization	Dialysis	1	24	69	Bone Sialoprotein	Bone sialoprotein 2 OS=Gallus gallus GN=IBSP PE=1 SV=1	P79780|SIAL_CHICK	R.YAYPPLHR.Y	Y	36.17	1015.52	8	0.7	508.77	2	15.79		F5:157	3	48	55
4	20-HCl-D	HCl	20 mL/g	Demineralization	Dialysis	1	2	4	Collagen I, alpha 1	Collagen alpha-1(I) chain OS=Gallus gallus GN=COL1A1 PE=1 SV=3	P02457|CO1A1_CHICK	R.DGAAGPKGDRGETGPAGP(+15.99)PGAP(+15.99)GAPGAP(+15.99)GPVGPAGK.N	Y	24.28	3092.49	36	1.4	774.131	4	13.26		F5:107	1	1016	1051	Oxidation or Hydroxylation	P18:Oxidation or Hydroxylation:0.00;P22:Oxidation or Hydroxylation:28.36;P28:Oxidation or Hydroxylation:14.04
4	20-HCl-D	HCl	20 mL/g	Demineralization	Dialysis	1	2	4	Collagen I, alpha 1	Collagen alpha-1(I) chain OS=Gallus gallus GN=COL1A1 PE=1 SV=3	P02457|CO1A1_CHICK	R.GAP(+15.99)GPP(+15.99)GAVGAAGKDGEAGAQGPP(+15.99)GPTGPAGER.G	Y	49.39	2855.34	33	1.1	952.789	3	13.84		F5:114	2	588	620	Oxidation or Hydroxylation	P3:Oxidation or Hydroxylation:32.28;P6:Oxidation or Hydroxylation:40.00;P24:Oxidation or Hydroxylation:217.79
4	20-HCl-D	HCl	20 mL/g	Demineralization	Dialysis	1	2	4	Collagen I, alpha 1	Collagen alpha-1(I) chain OS=Gallus gallus GN=COL1A1 PE=1 SV=3	P02457|CO1A1_CHICK	K.GDRGETGPAGPP(+15.99)GAP(+15.99)GAP(+15.99)GAPGPVGPAGK.N	Y	29.1	2496.2	29	1.5	833.075	3	13.94		F5:117	1	1023	1051	Oxidation or Hydroxylation	P12:Oxidation or Hydroxylation:0.00;P15:Oxidation or Hydroxylation:0.00;P18:Oxidation or Hydroxylation:0.00
4	20-HCl-D	HCl	20 mL/g	Demineralization	Dialysis	1	2	4	Collagen I, alpha 1	Collagen alpha-1(I) chain OS=Gallus gallus GN=COL1A1 PE=1 SV=3	P02457|CO1A1_CHICK	R.GAP(+15.99)GPP(+15.99)GAVGAAGKDGEAGAQGPPGPTGPAGER.G	Y	45.77	2839.35	33	1.7	947.458	3	14.36		F5:124	2	588	620	Oxidation or Hydroxylation	P3:Oxidation or Hydroxylation:20.41;P6:Oxidation or Hydroxylation:17.01
4	20-HCl-D	HCl	20 mL/g	Demineralization	Dialysis	1	2	4	Collagen I, alpha 1	Collagen alpha-1(I) chain OS=Gallus gallus GN=COL1A1 PE=1 SV=3	P02457|CO1A1_CHICK	R.GSAGPP(+15.99)GATGFP(+15.99)GAAGR.V	Y	49.22	1458.69	17	0.9	730.351	2	14.8		F5:132	4	855	871	Oxidation or Hydroxylation	P6:Oxidation or Hydroxylation:27.96;P12:Oxidation or Hydroxylation:27.96
4	20-HCl-D	HCl	20 mL/g	Demineralization	Dialysis	1	2	4	Collagen I, alpha 1	Collagen alpha-1(I) chain OS=Gallus gallus GN=COL1A1 PE=1 SV=3	P02457|CO1A1_CHICK	R.GEP(+15.99)GPAGLP(+15.99)GPAGER.G	Y	43.45	1392.66	15	0.3	697.339	2	14.83		F5:133	4	462	476	Oxidation or Hydroxylation	P3:Oxidation or Hydroxylation:7.32;P9:Oxidation or Hydroxylation:48.87
4	20-HCl-D	HCl	20 mL/g	Demineralization	Dialysis	1	2	4	Collagen I, alpha 1	Collagen alpha-1(I) chain OS=Gallus gallus GN=COL1A1 PE=1 SV=3	P02457|CO1A1_CHICK	R.GFP(+15.99)GADGIAGPKGPPGER(+15.99).G	Y	43.67	1710.83	18	0.9	856.424	2	16.83		F5:188	2	483	500	Oxidation or Hydroxylation	P3:Oxidation or Hydroxylation:7.65;R18:Oxidation or Hydroxylation:0.00
4	20-HCl-D	HCl	20 mL/g	Demineralization	Dialysis	1	2	4	Collagen I, alpha 1	Collagen alpha-1(I) chain OS=Gallus gallus GN=COL1A1 PE=1 SV=3	P02457|CO1A1_CHICK	K.GSP(+15.99)GADGPIGAP(+15.99)GTP(+15.99)GPQGIAGQR.G	Y	34.81	2162.04	24	1	721.686	3	17.13		F5:197	4	924	947	Oxidation or Hydroxylation	P3:Oxidation or Hydroxylation:24.24;P12:Oxidation or Hydroxylation:27.86;P15:Oxidation or Hydroxylation:18.53
4	20-HCl-D	HCl	20 mL/g	Demineralization	Dialysis	1	2	4	Collagen I, alpha 1	Collagen alpha-1(I) chain OS=Gallus gallus GN=COL1A1 PE=1 SV=3	P02457|CO1A1_CHICK	R.GLTGPIGPPGPAGAPGD(+21.98)K(+42.01)GEAGPPGPAGPTGAR.G	Y	18.5	2894.43	33	-4.6	965.812	3	17.5		F5:207	1	753	785	Sodium adduct; Acetylation (K)	D17:Sodium adduct:0.00;K18:Acetylation (K):1000.00
4	20-HCl-D	HCl	20 mL/g	Demineralization	Dialysis	1	2	4	Collagen I, alpha 1	Collagen alpha-1(I) chain OS=Gallus gallus GN=COL1A1 PE=1 SV=3	P02457|CO1A1_CHICK	R.GLTGPIGP(+15.99)PGPAGAPGDK(+15.99)GEAGPP(+15.99)GPAGPTGAR.G	Y	44.52	2878.42	33	1	720.613	4	17.59		F5:210	1	753	785	Oxidation or Hydroxylation	P8:Oxidation or Hydroxylation:22.45;K18:Oxidation or Hydroxylation:30.64;P24:Oxidation or Hydroxylation:34.08
4	20-HCl-D	HCl	20 mL/g	Demineralization	Dialysis	1	2	4	Collagen I, alpha 1	Collagen alpha-1(I) chain OS=Gallus gallus GN=COL1A1 PE=1 SV=3	P02457|CO1A1_CHICK	K.GATGAP(+15.99)GIAGAP(+15.99)GFP(+15.99)GAR.G	Y	46.4	1571.77	18	1.3	786.893	2	18		F5:222	2	387	404	Oxidation or Hydroxylation	P6:Oxidation or Hydroxylation:89.48;P12:Oxidation or Hydroxylation:14.63;P15:Oxidation or Hydroxylation:4.05
4	20-HCl-D	HCl	20 mL/g	Demineralization	Dialysis	1	2	4	Collagen I, alpha 1	Collagen alpha-1(I) chain OS=Gallus gallus GN=COL1A1 PE=1 SV=3	P02457|CO1A1_CHICK	R.GFSGLQGPPGP(+15.99)P(+15.99)GAP(+15.99)GEQGPSGASGPAGPR.G	Y	41.53	2688.25	30	1.1	897.092	3	19.42		F5:267	1	1101	1130	Oxidation or Hydroxylation	P11:Oxidation or Hydroxylation:60.15;P12:Oxidation or Hydroxylation:16.76;P15:Oxidation or Hydroxylation:52.22
4	20-HCl-D	HCl	20 mL/g	Demineralization	Dialysis	1	2	4	Collagen I, alpha 1	Collagen alpha-1(I) chain OS=Gallus gallus GN=COL1A1 PE=1 SV=3	P02457|CO1A1_CHICK	K.SAGVAVPGPMGPAGPR.G	Y	29.52	1419.73	16	-0.1	710.872	2	19.58		F5:272	1	161	176
4	20-HCl-D	HCl	20 mL/g	Demineralization	Dialysis	1	2	4	Collagen I, alpha 1	Collagen alpha-1(I) chain OS=Gallus gallus GN=COL1A1 PE=1 SV=3	P02457|CO1A1_CHICK	R.GQAGVMGFP(+15.99)GPK.G	Y	47.19	1160.56	12	0.7	581.29	2	19.72		F5:277	3	564	575	Oxidation or Hydroxylation	P9:Oxidation or Hydroxylation:13.67
4	20-HCl-D	HCl	20 mL/g	Demineralization	Dialysis	1	2	4	Collagen I, alpha 1	Collagen alpha-1(I) chain OS=Gallus gallus GN=COL1A1 PE=1 SV=3	P02457|CO1A1_CHICK	R.GQAGVM(+15.99)GFP(+15.99)GPK.G	Y	30.06	1176.56	12	0.3	589.287	2	19.9		F5:283	1	564	575	Oxidation (M); Oxidation or Hydroxylation	M6:Oxidation (M):1000.00;P9:Oxidation or Hydroxylation:5.03
4	20-HCl-D	HCl	20 mL/g	Demineralization	Dialysis	1	2	4	Collagen I, alpha 1	Collagen alpha-1(I) chain OS=Gallus gallus GN=COL1A1 PE=1 SV=3	P02457|CO1A1_CHICK	K.DGLNGLP(+15.99)GPIGPP(+31.99)GPR.G	Y	29.46	1560.79	16	0.7	781.403	2	20.79		F5:312	1	1142	1157	Oxidation or Hydroxylation; Dihydroxy	P7:Oxidation or Hydroxylation:26.31;P13:Dihydroxy:0.00
4	20-HCl-D	HCl	20 mL/g	Demineralization	Dialysis	1	2	4	Collagen I, alpha 1	Collagen alpha-1(I) chain OS=Gallus gallus GN=COL1A1 PE=1 SV=3	P02457|CO1A1_CHICK	R.LPIIDLAPM(+15.99)DVGAPDQEFGIDIGPVC(+57.02)FL	Y	24.05	3027.5	28	0.7	1010.17	3	43.23		F5:699	1	1426	1453	Oxidation (M); Carbamidomethylation	M9:Oxidation (M):1000.00;C26:Carbamidomethylation:1000.00
4	20-HCl-D	HCl	20 mL/g	Demineralization	Dialysis	2	2	4	Collagen I, alpha 1	Collagen alpha-1(I) chain OS=Gallus gallus GN=COL1A1 PE=1 SV=3	P02457|CO1A1_CHICK	R.DGAAGPKGDRGETGPAGPP(+15.99)GAP(+15.99)GAPGAP(+15.99)GPVGPAGK.N	Y	22.22	3092.49	36	1.4	774.131	4	13.12		F6:109	1	1016	1051	Oxidation or Hydroxylation	P19:Oxidation or Hydroxylation:5.18;P22:Oxidation or Hydroxylation:16.03;P28:Oxidation or Hydroxylation:14.04
4	20-HCl-D	HCl	20 mL/g	Demineralization	Dialysis	2	2	4	Collagen I, alpha 1	Collagen alpha-1(I) chain OS=Gallus gallus GN=COL1A1 PE=1 SV=3	P02457|CO1A1_CHICK	R.DGAAGPKGDRGETGPAGPP(+15.99)GAPGAP(+15.99)GAP(+15.99)GPVGPAGK.N	Y	28.92	3092.49	36	0.6	1031.84	3	13.22		F6:112	1	1016	1051	Oxidation or Hydroxylation	P19:Oxidation or Hydroxylation:38.03;P25:Oxidation or Hydroxylation:33.54;P28:Oxidation or Hydroxylation:55.46
4	20-HCl-D	HCl	20 mL/g	Demineralization	Dialysis	2	2	4	Collagen I, alpha 1	Collagen alpha-1(I) chain OS=Gallus gallus GN=COL1A1 PE=1 SV=3	P02457|CO1A1_CHICK	R.GFP(+15.99)GADGIAGPKGPP(+15.99)GER.G	Y	49.99	1710.83	18	1.4	856.425	2	16.43		F6:192	2	483	500	Oxidation or Hydroxylation	P3:Oxidation or Hydroxylation:14.02;P15:Oxidation or Hydroxylation:5.77
4	20-HCl-D	HCl	20 mL/g	Demineralization	Dialysis	2	2	4	Collagen I, alpha 1	Collagen alpha-1(I) chain OS=Gallus gallus GN=COL1A1 PE=1 SV=3	P02457|CO1A1_CHICK	R.GLTGPIGPP(+15.99)GPAGAP(+15.99)GDKGEAGPP(+15.99)GPAGPTGAR.G	Y	52.93	2878.42	33	0.8	960.482	3	17.1		F6:209	3	753	785	Oxidation or Hydroxylation	P9:Oxidation or Hydroxylation:46.31;P15:Oxidation or Hydroxylation:61.82;P24:Oxidation or Hydroxylation:77.21
4	20-HCl-D	HCl	20 mL/g	Demineralization	Dialysis	2	2	4	Collagen I, alpha 1	Collagen alpha-1(I) chain OS=Gallus gallus GN=COL1A1 PE=1 SV=3	P02457|CO1A1_CHICK	R.GLTGPIGPP(+15.99)GPAGAPGD(+15.99)KGEAGPP(+15.99)GPAGPTGAR.G	Y	54.6	2878.42	33	1.7	960.482	3	17.34		F6:217	1	753	785	Oxidation or Hydroxylation	P9:Oxidation or Hydroxylation:63.97;D17:Oxidation or Hydroxylation:95.39;P24:Oxidation or Hydroxylation:77.14
4	20-HCl-D	HCl	20 mL/g	Demineralization	Dialysis	2	2	4	Collagen I, alpha 1	Collagen alpha-1(I) chain OS=Gallus gallus GN=COL1A1 PE=1 SV=3	P02457|CO1A1_CHICK	R.GLTGPIGPPGP(+15.99)AGAP(+15.99)GDKGEAGPP(+15.99)GPAGPTGAR.G	Y	30.93	2878.42	33	0.8	720.613	4	17.55		F6:224	1	753	785	Oxidation or Hydroxylation	P11:Oxidation or Hydroxylation:0.00;P15:Oxidation or Hydroxylation:0.00;P24:Oxidation or Hydroxylation:10.11
4	20-HCl-D	HCl	20 mL/g	Demineralization	Dialysis	2	2	4	Collagen I, alpha 1	Collagen alpha-1(I) chain OS=Gallus gallus GN=COL1A1 PE=1 SV=3	P02457|CO1A1_CHICK	K.GATGAP(+15.99)GIAGAP(+15.99)GFPGAR(+15.99).G	Y	44.94	1571.77	18	1.3	786.893	2	17.62		F6:226	2	387	404	Oxidation or Hydroxylation	P6:Oxidation or Hydroxylation:96.04;P12:Oxidation or Hydroxylation:9.16;R18:Oxidation or Hydroxylation:0.00
4	20-HCl-D	HCl	20 mL/g	Demineralization	Dialysis	2	2	4	Collagen I, alpha 1	Collagen alpha-1(I) chain OS=Gallus gallus GN=COL1A1 PE=1 SV=3	P02457|CO1A1_CHICK	R.GFP(+15.99)GADGIAGPK.G	Y	42	1101.55	12	0.8	551.78	2	17.64		F6:227	3	483	494	Oxidation or Hydroxylation	P3:Oxidation or Hydroxylation:12.28
4	20-HCl-D	HCl	20 mL/g	Demineralization	Dialysis	2	2	4	Collagen I, alpha 1	Collagen alpha-1(I) chain OS=Gallus gallus GN=COL1A1 PE=1 SV=3	P02457|CO1A1_CHICK	R.GPP(+15.99)GPMGPP(+15.99)GLAGPP(+15.99)GEAGR.E	Y	46.88	1815.86	20	1.6	908.937	2	17.67		F6:228	2	984	1003	Oxidation or Hydroxylation	P3:Oxidation or Hydroxylation:12.28;P9:Oxidation or Hydroxylation:27.96;P15:Oxidation or Hydroxylation:12.28
4	20-HCl-D	HCl	20 mL/g	Demineralization	Dialysis	2	2	4	Collagen I, alpha 1	Collagen alpha-1(I) chain OS=Gallus gallus GN=COL1A1 PE=1 SV=3	P02457|CO1A1_CHICK	R.GFSGLQGPP(+15.99)GPP(+15.99)GAP(+15.99)GEQGPSGASGPAGPR.G	Y	53.08	2688.25	30	2.1	1345.14	2	19.12		F6:275	5	1101	1130	Oxidation or Hydroxylation	P9:Oxidation or Hydroxylation:55.73;P12:Oxidation or Hydroxylation:130.57;P15:Oxidation or Hydroxylation:120.62
4	20-HCl-D	HCl	20 mL/g	Demineralization	Dialysis	2	2	4	Collagen I, alpha 1	Collagen alpha-1(I) chain OS=Gallus gallus GN=COL1A1 PE=1 SV=3	P02457|CO1A1_CHICK	R.GQAGVMGFPGPK(+15.99).G	Y	43.33	1160.56	12	0.7	581.29	2	19.34		F6:282	1	564	575	Oxidation or Hydroxylation	K12:Oxidation or Hydroxylation:7.77
4	20-HCl-D	HCl	20 mL/g	Demineralization	Dialysis	2	2	4	Collagen I, alpha 1	Collagen alpha-1(I) chain OS=Gallus gallus GN=COL1A1 PE=1 SV=3	P02457|CO1A1_CHICK	R.GFSGLQGP(+15.99)PGPP(+15.99)GAP(+15.99)GEQGPSGASGPAGPR.G	Y	36.76	2688.25	30	1.3	897.093	3	19.4		F6:284	1	1101	1130	Oxidation or Hydroxylation	P8:Oxidation or Hydroxylation:22.45;P12:Oxidation or Hydroxylation:22.45;P15:Oxidation or Hydroxylation:33.81
4	20-HCl-D	HCl	20 mL/g	Demineralization	Dialysis	2	2	4	Collagen I, alpha 1	Collagen alpha-1(I) chain OS=Gallus gallus GN=COL1A1 PE=1 SV=3	P02457|CO1A1_CHICK	R.GQAGVMGF(+15.99)P(+15.99)GPK.G	Y	43.98	1176.56	12	1	589.288	2	19.44		F6:285	2	564	575	Oxidation or Hydroxylation	F8:Oxidation or Hydroxylation:22.45;P9:Oxidation or Hydroxylation:0.00
4	20-HCl-D	HCl	20 mL/g	Demineralization	Dialysis	2	2	4	Collagen I, alpha 1	Collagen alpha-1(I) chain OS=Gallus gallus GN=COL1A1 PE=1 SV=3	P02457|CO1A1_CHICK	R.GFSGLQGPP(+15.99)GPPGAP(+15.99)GEQGPSGASGPAGPR.G	Y	28.76	2672.26	30	1.5	891.761	3	19.76		F6:295	1	1101	1130	Oxidation or Hydroxylation	P9:Oxidation or Hydroxylation:8.22;P15:Oxidation or Hydroxylation:28.36
4	20-HCl-D	HCl	20 mL/g	Demineralization	Dialysis	2	2	4	Collagen I, alpha 1	Collagen alpha-1(I) chain OS=Gallus gallus GN=COL1A1 PE=1 SV=3	P02457|CO1A1_CHICK	K.DGLNGLP(+15.99)GPIGP(+15.99)PGPR(+15.99).G	Y	40.4	1560.79	16	0.9	781.403	2	20.15		F6:308	3	1142	1157	Oxidation or Hydroxylation	P7:Oxidation or Hydroxylation:45.01;P12:Oxidation or Hydroxylation:0.00;R16:Oxidation or Hydroxylation:0.00
4	20-HCl-D	HCl	20 mL/g	Demineralization	Dialysis	1	1	1	Collagen I, alpha 2	Collagen alpha-2(I) chain OS=Gallus gallus GN=COL1A2 PE=4 SV=1	tr|F1P0H9|F1P0H9_CHICK	R.GP(+15.99)SGPPGPDGNKGEP(+15.99)GNVGPAGAP(+15.99)GPAGPGGIP(+15.99)GER.G	Y	37.3	3191.49	36	1.2	1064.84	3	15.52		F5:150	1	609	644	Oxidation or Hydroxylation	P2:Oxidation or Hydroxylation:0.00;P15:Oxidation or Hydroxylation:22.37;P24:Oxidation or Hydroxylation:34.30;P33:Oxidation or Hydroxylation:22.37
4	20-HCl-D	HCl	20 mL/g	Demineralization	Dialysis	1	1	1	Collagen I, alpha 2	Collagen alpha-2(I) chain OS=Gallus gallus GN=COL1A2 PE=4 SV=1	tr|F1P0H9|F1P0H9_CHICK	R.GLHGEFGVP(+15.99)GP(+15.99)AGPR.G	Y	28.55	1478.73	15	0.4	493.916	3	16.27		F5:171	1	573	587	Oxidation or Hydroxylation	P9:Oxidation or Hydroxylation:26.52;P11:Oxidation or Hydroxylation:47.09
4	20-HCl-D	HCl	20 mL/g	Demineralization	Dialysis	1	1	1	Collagen I, alpha 2	Collagen alpha-2(I) chain OS=Gallus gallus GN=COL1A2 PE=4 SV=1	tr|F1P0H9|F1P0H9_CHICK	R.GLHGEFGVP(+15.99)GPAGPR(+15.99).G	Y	40.16	1478.73	15	1.3	740.371	2	16.3		F5:172	1	573	587	Oxidation or Hydroxylation	P9:Oxidation or Hydroxylation:26.31;R15:Oxidation or Hydroxylation:8.26
4	20-HCl-D	HCl	20 mL/g	Demineralization	Dialysis	1	1	1	Collagen I, alpha 2	Collagen alpha-2(I) chain OS=Gallus gallus GN=COL1A2 PE=4 SV=1	tr|F1P0H9|F1P0H9_CHICK	R.VGP(+15.99)P(+15.99)GPAGITGPP(+15.99)GPP(+15.99)GPAGK.D	Y	33.37	1840.93	21	1.4	921.475	2	16.5		F5:178	5	794	814	Oxidation or Hydroxylation	P3:Oxidation or Hydroxylation:19.27;P4:Oxidation or Hydroxylation:18.53;P13:Oxidation or Hydroxylation:26.02;P16:Oxidation or Hydroxylation:40.00
4	20-HCl-D	HCl	20 mL/g	Demineralization	Dialysis	1	1	1	Collagen I, alpha 2	Collagen alpha-2(I) chain OS=Gallus gallus GN=COL1A2 PE=4 SV=1	tr|F1P0H9|F1P0H9_CHICK	R.VGN(sub P)P(+15.99)GPAGITGPP(+15.99)GPP(+15.99)GPAGK.D	Y	19.38	1841.93	21	4.8	921.975	2	16.71		F5:184	1	794	814	Oxidation or Hydroxylation; Mutation	P4:Oxidation or Hydroxylation:14.02;P13:Oxidation or Hydroxylation:14.02;P16:Oxidation or Hydroxylation:0.00
4	20-HCl-D	HCl	20 mL/g	Demineralization	Dialysis	1	1	1	Collagen I, alpha 2	Collagen alpha-2(I) chain OS=Gallus gallus GN=COL1A2 PE=4 SV=1	tr|F1P0H9|F1P0H9_CHICK	R.GPP(+15.99)GPSGPPGKDGRN(+.98)GLP(+15.99)GPIGPAGVR.G	Y	29.19	2493.27	27	0.7	624.326	4	16.93		F5:191	1	1053	1079	Oxidation or Hydroxylation; Deamidation (NQ)	P3:Oxidation or Hydroxylation:14.02;N15:Deamidation (NQ):1000.00;P18:Oxidation or Hydroxylation:11.10
4	20-HCl-D	HCl	20 mL/g	Demineralization	Dialysis	1	1	1	Collagen I, alpha 2	Collagen alpha-2(I) chain OS=Gallus gallus GN=COL1A2 PE=4 SV=1	tr|F1P0H9|F1P0H9_CHICK	K.GEIGPAGNVGPTGPAGPR.G	Y	51.48	1602.81	18	0.9	802.414	2	17.1		F5:196	1	264	281
4	20-HCl-D	HCl	20 mL/g	Demineralization	Dialysis	1	1	1	Collagen I, alpha 2	Collagen alpha-2(I) chain OS=Gallus gallus GN=COL1A2 PE=4 SV=1	tr|F1P0H9|F1P0H9_CHICK	R.GLHGEFGVP(+15.99)GPAGPR.G	Y	47.76	1462.73	15	1.1	732.374	2	17.45		F5:205	4	573	587	Oxidation or Hydroxylation	P9:Oxidation or Hydroxylation:30.83
4	20-HCl-D	HCl	20 mL/g	Demineralization	Dialysis	1	1	1	Collagen I, alpha 2	Collagen alpha-2(I) chain OS=Gallus gallus GN=COL1A2 PE=4 SV=1	tr|F1P0H9|F1P0H9_CHICK	R.GLP(+15.99)GESGAVGPAGPIGSR.G	Y	49.57	1593.81	18	0	797.913	2	18.38		F5:235	4	591	608	Oxidation or Hydroxylation	P3:Oxidation or Hydroxylation:115.01
4	20-HCl-D	HCl	20 mL/g	Demineralization	Dialysis	1	1	1	Collagen I, alpha 2	Collagen alpha-2(I) chain OS=Gallus gallus GN=COL1A2 PE=4 SV=1	tr|F1P0H9|F1P0H9_CHICK	R.GLP(+15.99)GESGAVGP(+31.99)AGPIGSR.G	Y	32.3	1625.8	18	0.4	813.908	2	18.7		F5:246	1	591	608	Oxidation or Hydroxylation; Dihydroxy	P3:Oxidation or Hydroxylation:31.91;P11:Dihydroxy:44.44
4	20-HCl-D	HCl	20 mL/g	Demineralization	Dialysis	1	1	1	Collagen I, alpha 2	Collagen alpha-2(I) chain OS=Gallus gallus GN=COL1A2 PE=4 SV=1	tr|F1P0H9|F1P0H9_CHICK	R.GDAGPP(+15.99)GMTGFP(+15.99)GAAGR.V	Y	49.72	1546.68	17	0.5	774.349	2	18.85		F5:250	1	777	793	Oxidation or Hydroxylation	P6:Oxidation or Hydroxylation:30.46;P12:Oxidation or Hydroxylation:11.50
4	20-HCl-D	HCl	20 mL/g	Demineralization	Dialysis	1	1	1	Collagen I, alpha 2	Collagen alpha-2(I) chain OS=Gallus gallus GN=COL1A2 PE=4 SV=1	tr|F1P0H9|F1P0H9_CHICK	R.VGPIGPAGNRGEP(+15.99)GNIGFPGP(+15.99)K.G	Y	42.2	2119.08	22	1	1060.55	2	19.31		F5:264	2	476	497	Oxidation or Hydroxylation	P13:Oxidation or Hydroxylation:11.10;P21:Oxidation or Hydroxylation:0.00
4	20-HCl-D	HCl	20 mL/g	Demineralization	Dialysis	1	1	1	Collagen I, alpha 2	Collagen alpha-2(I) chain OS=Gallus gallus GN=COL1A2 PE=4 SV=1	tr|F1P0H9|F1P0H9_CHICK	K.GAAGLP(+15.99)GVAGAP(+15.99)GLPGPR(+15.99).G	Y	40.92	1561.82	18	1.7	781.919	2	19.52		F5:270	2	309	326	Oxidation or Hydroxylation	P6:Oxidation or Hydroxylation:142.42;P12:Oxidation or Hydroxylation:38.16;R18:Oxidation or Hydroxylation:0.00
4	20-HCl-D	HCl	20 mL/g	Demineralization	Dialysis	1	1	1	Collagen I, alpha 2	Collagen alpha-2(I) chain OS=Gallus gallus GN=COL1A2 PE=4 SV=1	tr|F1P0H9|F1P0H9_CHICK	K.GP(+15.99)KGETGPTGAIGPIGASGPP(+15.99)GPVGAAGPAGPR.G	Y	55.83	2836.45	33	1	946.49	3	19.74		F5:278	1	744	776	Oxidation or Hydroxylation	P2:Oxidation or Hydroxylation:0.00;P21:Oxidation or Hydroxylation:97.31
4	20-HCl-D	HCl	20 mL/g	Demineralization	Dialysis	1	1	1	Collagen I, alpha 2	Collagen alpha-2(I) chain OS=Gallus gallus GN=COL1A2 PE=4 SV=1	tr|F1P0H9|F1P0H9_CHICK	K.GPKGETGPTGAIGPIGASGPP(+15.99)GPVGAAGPAGPR.G	Y	53.55	2820.45	33	1.2	941.159	3	19.86		F5:282	2	744	776	Oxidation or Hydroxylation	P21:Oxidation or Hydroxylation:12.28
4	20-HCl-D	HCl	20 mL/g	Demineralization	Dialysis	1	1	1	Collagen I, alpha 2	Collagen alpha-2(I) chain OS=Gallus gallus GN=COL1A2 PE=4 SV=1	tr|F1P0H9|F1P0H9_CHICK	R.N(+.98)GLP(+15.99)GPIGPAGVR.G	Y	39.47	1220.65	13	0.7	611.333	2	21.24		F5:325	1	1067	1079	Deamidation (NQ); Oxidation or Hydroxylation	N1:Deamidation (NQ):1000.00;P4:Oxidation or Hydroxylation:60.92
4	20-HCl-D	HCl	20 mL/g	Demineralization	Dialysis	1	1	1	Collagen I, alpha 2	Collagen alpha-2(I) chain OS=Gallus gallus GN=COL1A2 PE=4 SV=1	tr|F1P0H9|F1P0H9_CHICK	R.GDP(+15.99)GPVGPVGPAGAFGPR(+31.99).G	Y	17.05	1651.8	18	-0.5	826.904	2	22.28		F5:352	1	978	995	Oxidation or Hydroxylation; Dihydroxy	P3:Oxidation or Hydroxylation:0.00;R18:Dihydroxy:6.08
4	20-HCl-D	HCl	20 mL/g	Demineralization	Dialysis	1	1	1	Collagen I, alpha 2	Collagen alpha-2(I) chain OS=Gallus gallus GN=COL1A2 PE=4 SV=1	tr|F1P0H9|F1P0H9_CHICK	R.GFP(+15.99)GTP(+15.99)GLPGF(+15.99)K.G	Y	36.31	1221.6	12	0.6	611.809	2	22.56		F5:360	3	165	176	Oxidation or Hydroxylation	P3:Oxidation or Hydroxylation:14.02;P6:Oxidation or Hydroxylation:56.34;F11:Oxidation or Hydroxylation:0.00
4	20-HCl-D	HCl	20 mL/g	Demineralization	Dialysis	1	1	1	Collagen I, alpha 2	Collagen alpha-2(I) chain OS=Gallus gallus GN=COL1A2 PE=4 SV=1	tr|F1P0H9|F1P0H9_CHICK	R.GDPGPVGP(+31.99)VGPAGAFGPR.G	Y	21.62	1635.8	18	-0.4	818.907	2	22.96		F5:373	1	978	995	Dihydroxy	P8:Dihydroxy:7.40
4	20-HCl-D	HCl	20 mL/g	Demineralization	Dialysis	1	1	1	Collagen I, alpha 2	Collagen alpha-2(I) chain OS=Gallus gallus GN=COL1A2 PE=4 SV=1	tr|F1P0H9|F1P0H9_CHICK	R.GLP(+15.99)GIAGATGEP(+15.99)GPLGVSGPPGAR(+15.99).G	Y	44.88	2132.09	24	1.2	1067.05	2	23.06		F5:375	2	882	905	Oxidation or Hydroxylation	P3:Oxidation or Hydroxylation:176.32;P12:Oxidation or Hydroxylation:33.18;R24:Oxidation or Hydroxylation:0.00
4	20-HCl-D	HCl	20 mL/g	Demineralization	Dialysis	1	1	1	Collagen I, alpha 2	Collagen alpha-2(I) chain OS=Gallus gallus GN=COL1A2 PE=4 SV=1	tr|F1P0H9|F1P0H9_CHICK	R.GLP(+15.99)GIAGATGEP(+15.99)GPLGVSGPP(+15.99)GAR.G	Y	44.28	2132.09	24	0.5	711.703	3	23.11		F5:377	2	882	905	Oxidation or Hydroxylation	P3:Oxidation or Hydroxylation:128.75;P12:Oxidation or Hydroxylation:22.85;P21:Oxidation or Hydroxylation:0.00
4	20-HCl-D	HCl	20 mL/g	Demineralization	Dialysis	2	1	1	Collagen I, alpha 2	Collagen alpha-2(I) chain OS=Gallus gallus GN=COL1A2 PE=4 SV=1	tr|F1P0H9|F1P0H9_CHICK	R.GLP(+15.99)GAIGAP(+15.99)GPAGGAGDR.G	Y	38.23	1521.75	18	0.9	761.885	2	15.77		F6:172	1	675	692	Oxidation or Hydroxylation	P3:Oxidation or Hydroxylation:131.72;P9:Oxidation or Hydroxylation:45.01
4	20-HCl-D	HCl	20 mL/g	Demineralization	Dialysis	2	1	1	Collagen I, alpha 2	Collagen alpha-2(I) chain OS=Gallus gallus GN=COL1A2 PE=4 SV=1	tr|F1P0H9|F1P0H9_CHICK	R.VGN(sub P)P(+15.99)GPAGITGPP(+15.99)GPPGP(+15.99)AGK.D	Y	16.87	1841.93	21	5	921.976	2	16.22		F6:185	1	794	814	Oxidation or Hydroxylation; Mutation	P4:Oxidation or Hydroxylation:14.02;P13:Oxidation or Hydroxylation:20.92;P18:Oxidation or Hydroxylation:0.00
4	20-HCl-D	HCl	20 mL/g	Demineralization	Dialysis	2	1	1	Collagen I, alpha 2	Collagen alpha-2(I) chain OS=Gallus gallus GN=COL1A2 PE=4 SV=1	tr|F1P0H9|F1P0H9_CHICK	R.VGP(+15.99)P(+15.99)GPAGITGPP(+15.99)GP(+15.99)PGPAGK.D	Y	24.55	1840.93	21	0.7	614.652	3	16.25		F6:186	1	794	814	Oxidation or Hydroxylation	P3:Oxidation or Hydroxylation:38.16;P4:Oxidation or Hydroxylation:26.31;P13:Oxidation or Hydroxylation:10.03;P15:Oxidation or Hydroxylation:0.00
4	20-HCl-D	HCl	20 mL/g	Demineralization	Dialysis	2	1	1	Collagen I, alpha 2	Collagen alpha-2(I) chain OS=Gallus gallus GN=COL1A2 PE=4 SV=1	tr|F1P0H9|F1P0H9_CHICK	R.GLP(+15.99)GAIGAP(+15.99)GPAGGAGDRGEGGPAGPAGPAGAR.G	Y	37.83	2724.33	33	1.3	909.119	3	16.38		F6:190	4	675	707	Oxidation or Hydroxylation	P3:Oxidation or Hydroxylation:131.34;P9:Oxidation or Hydroxylation:26.31
4	20-HCl-D	HCl	20 mL/g	Demineralization	Dialysis	2	1	1	Collagen I, alpha 2	Collagen alpha-2(I) chain OS=Gallus gallus GN=COL1A2 PE=4 SV=1	tr|F1P0H9|F1P0H9_CHICK	R.GLP(+31.99)GAIGAPGPAGGAGDRGEGGPAGPAGPAGAR.G	Y	33.07	2724.33	33	1.5	1363.18	2	16.52		F6:195	1	675	707	Dihydroxy	P3:Dihydroxy:0.00
4	20-HCl-D	HCl	20 mL/g	Demineralization	Dialysis	2	1	1	Collagen I, alpha 2	Collagen alpha-2(I) chain OS=Gallus gallus GN=COL1A2 PE=4 SV=1	tr|F1P0H9|F1P0H9_CHICK	K.EGPVGFP(+15.99)GADGR.V	Y	42.71	1173.54	12	0.4	587.778	2	17.07		F6:208	2	464	475	Oxidation or Hydroxylation	P7:Oxidation or Hydroxylation:11.06
4	20-HCl-D	HCl	20 mL/g	Demineralization	Dialysis	2	1	1	Collagen I, alpha 2	Collagen alpha-2(I) chain OS=Gallus gallus GN=COL1A2 PE=4 SV=1	tr|F1P0H9|F1P0H9_CHICK	R.TGEQGIAGPP(+15.99)GFAGEK.G	Y	43.81	1530.73	16	1	766.374	2	17.76		F6:231	2	830	845	Oxidation or Hydroxylation	P10:Oxidation or Hydroxylation:13.67
4	20-HCl-D	HCl	20 mL/g	Demineralization	Dialysis	2	1	1	Collagen I, alpha 2	Collagen alpha-2(I) chain OS=Gallus gallus GN=COL1A2 PE=4 SV=1	tr|F1P0H9|F1P0H9_CHICK	R.GDAGPP(+15.99)GMTGFPGAAGR(+15.99).V	Y	50.49	1546.68	17	0.9	774.35	2	18.46		F6:254	1	777	793	Oxidation or Hydroxylation	P6:Oxidation or Hydroxylation:26.02;R17:Oxidation or Hydroxylation:0.00
4	20-HCl-D	HCl	20 mL/g	Demineralization	Dialysis	2	1	1	Collagen I, alpha 2	Collagen alpha-2(I) chain OS=Gallus gallus GN=COL1A2 PE=4 SV=1	tr|F1P0H9|F1P0H9_CHICK	K.GETGPAGPP(+15.99)GFQGLP(+15.99)GPSGPAGEAGKPGER(+15.99).G	Y	52.6	2776.31	30	1.4	926.444	3	18.58		F6:258	2	543	572	Oxidation or Hydroxylation	P9:Oxidation or Hydroxylation:58.99;P15:Oxidation or Hydroxylation:44.44;R30:Oxidation or Hydroxylation:108.04
4	20-HCl-D	HCl	20 mL/g	Demineralization	Dialysis	2	1	1	Collagen I, alpha 2	Collagen alpha-2(I) chain OS=Gallus gallus GN=COL1A2 PE=4 SV=1	tr|F1P0H9|F1P0H9_CHICK	K.GETGPAGPP(+15.99)GFQGLP(+15.99)GPSGPAGEAGKP(+15.99)GER.G	Y	48.87	2776.31	30	1.2	926.443	3	18.76		F6:264	1	543	572	Oxidation or Hydroxylation	P9:Oxidation or Hydroxylation:59.30;P15:Oxidation or Hydroxylation:23.57;P27:Oxidation or Hydroxylation:13.18
4	20-HCl-D	HCl	20 mL/g	Demineralization	Dialysis	2	1	1	Collagen I, alpha 2	Collagen alpha-2(I) chain OS=Gallus gallus GN=COL1A2 PE=4 SV=1	tr|F1P0H9|F1P0H9_CHICK	R.VGPIGPAGNRGEP(+15.99)GNIGFPGPK(+15.99).G	Y	34.49	2119.08	22	0.9	707.368	3	19.02		F6:271	1	476	497	Oxidation or Hydroxylation	P13:Oxidation or Hydroxylation:14.04;K22:Oxidation or Hydroxylation:0.00
4	20-HCl-D	HCl	20 mL/g	Demineralization	Dialysis	2	1	1	Collagen I, alpha 2	Collagen alpha-2(I) chain OS=Gallus gallus GN=COL1A2 PE=4 SV=1	tr|F1P0H9|F1P0H9_CHICK	R.NGLP(+15.99)GPIGPAGVR.G	Y	38.4	1219.67	13	1	610.841	2	19.04		F6:272	4	1067	1079	Oxidation or Hydroxylation	P4:Oxidation or Hydroxylation:47.09
4	20-HCl-D	HCl	20 mL/g	Demineralization	Dialysis	2	1	1	Collagen I, alpha 2	Collagen alpha-2(I) chain OS=Gallus gallus GN=COL1A2 PE=4 SV=1	tr|F1P0H9|F1P0H9_CHICK	R.VGPIGPAGNRGEP(+15.99)GNIGFP(+15.99)GPK.G	Y	33.3	2119.08	22	1	1060.55	2	19.15		F6:276	1	476	497	Oxidation or Hydroxylation	P13:Oxidation or Hydroxylation:9.40;P19:Oxidation or Hydroxylation:0.00
4	20-HCl-D	HCl	20 mL/g	Demineralization	Dialysis	2	1	1	Collagen I, alpha 2	Collagen alpha-2(I) chain OS=Gallus gallus GN=COL1A2 PE=4 SV=1	tr|F1P0H9|F1P0H9_CHICK	K.GAAGLP(+15.99)GVAGAP(+15.99)GLPGP(+15.99)R.G	Y	41.41	1561.82	18	1.2	781.919	2	19.32		F6:281	2	309	326	Oxidation or Hydroxylation	P6:Oxidation or Hydroxylation:142.42;P12:Oxidation or Hydroxylation:22.45;P17:Oxidation or Hydroxylation:0.00
4	20-HCl-D	HCl	20 mL/g	Demineralization	Dialysis	2	1	1	Collagen I, alpha 2	Collagen alpha-2(I) chain OS=Gallus gallus GN=COL1A2 PE=4 SV=1	tr|F1P0H9|F1P0H9_CHICK	K.GPK(+15.99)GETGPTGAIGPIGASGPP(+15.99)GPVGAAGPAGPR.G	Y	58.95	2836.45	33	1.1	946.49	3	19.67		F6:293	1	744	776	Oxidation or Hydroxylation	K3:Oxidation or Hydroxylation:0.00;P21:Oxidation or Hydroxylation:12.28
4	20-HCl-D	HCl	20 mL/g	Demineralization	Dialysis	2	1	1	Collagen I, alpha 2	Collagen alpha-2(I) chain OS=Gallus gallus GN=COL1A2 PE=4 SV=1	tr|F1P0H9|F1P0H9_CHICK	R.GD(-18.01)VGPVG.R	Y	21.33	581.281	7	7.6	582.293	1	4.13		F6:30	2	822	828	Dehydration	D2:Dehydration:1000.00
4	20-HCl-D	HCl	20 mL/g	Demineralization	Dialysis	2	1	1	Collagen I, alpha 2	Collagen alpha-2(I) chain OS=Gallus gallus GN=COL1A2 PE=4 SV=1	tr|F1P0H9|F1P0H9_CHICK	R.GSDGSAGPTGPAGPIGAAGPP(+15.99)GFP(+15.99)GAP(+15.99)GAK.G	Y	32.36	2520.19	30	-0.8	841.069	3	20.61		F6:322	2	234	263	Oxidation or Hydroxylation	P21:Oxidation or Hydroxylation:21.66;P24:Oxidation or Hydroxylation:34.30;P27:Oxidation or Hydroxylation:61.69
4	20-HCl-D	HCl	20 mL/g	Demineralization	Dialysis	2	1	1	Collagen I, alpha 2	Collagen alpha-2(I) chain OS=Gallus gallus GN=COL1A2 PE=4 SV=1	tr|F1P0H9|F1P0H9_CHICK	K.GETGPTGAIGPIGASGPP(+15.99)GPVGAAGPAGPR.G	Y	56.9	2538.28	30	1.7	1270.15	2	21.68		F6:356	3	747	776	Oxidation or Hydroxylation	P18:Oxidation or Hydroxylation:52.72
4	20-HCl-D	HCl	20 mL/g	Demineralization	Dialysis	2	1	1	Collagen I, alpha 2	Collagen alpha-2(I) chain OS=Gallus gallus GN=COL1A2 PE=4 SV=1	tr|F1P0H9|F1P0H9_CHICK	G.NRGDPGPVGPVGPAGAFG.P	Y	20.69	1620.8	18	5.9	811.412	2	22.02		F6:365	1	976	993
4	20-HCl-D	HCl	20 mL/g	Demineralization	Dialysis	2	1	1	Collagen I, alpha 2	Collagen alpha-2(I) chain OS=Gallus gallus GN=COL1A2 PE=4 SV=1	tr|F1P0H9|F1P0H9_CHICK	R.GDP(+15.99)GPVGPVGPAGAFGPR.G	Y	52.48	1619.81	18	0.6	810.91	2	22.26		F6:371	4	978	995	Oxidation or Hydroxylation	P3:Oxidation or Hydroxylation:9.34
4	20-HCl-D	HCl	20 mL/g	Demineralization	Dialysis	2	1	1	Collagen I, alpha 2	Collagen alpha-2(I) chain OS=Gallus gallus GN=COL1A2 PE=4 SV=1	tr|F1P0H9|F1P0H9_CHICK	R.GDPGPVGPVGPAGAFGPR.G	Y	55.06	1603.81	18	1.2	802.913	2	22.51		F6:379	4	978	995
4	20-HCl-D	HCl	20 mL/g	Demineralization	Dialysis	2	1	1	Collagen I, alpha 2	Collagen alpha-2(I) chain OS=Gallus gallus GN=COL1A2 PE=4 SV=1	tr|F1P0H9|F1P0H9_CHICK	R.GLP(+15.99)GIAGATGEP(+15.99)GPLGVSGP(+15.99)PGAR.G	Y	46.9	2132.09	24	0.6	711.703	3	22.94		F6:392	3	882	905	Oxidation or Hydroxylation	P3:Oxidation or Hydroxylation:134.40;P12:Oxidation or Hydroxylation:22.85;P20:Oxidation or Hydroxylation:0.00
4	20-HCl-D	HCl	20 mL/g	Demineralization	Dialysis	2	1	1	Collagen I, alpha 2	Collagen alpha-2(I) chain OS=Gallus gallus GN=COL1A2 PE=4 SV=1	tr|F1P0H9|F1P0H9_CHICK	K.AADFGPGPMGLMGPR.G	Y	53.26	1472.69	15	1.5	737.354	2	26.98		F6:505	2	84	98
4	20-HCl-D	HCl	20 mL/g	Demineralization	Dialysis	2	1	1	Collagen I, alpha 2	Collagen alpha-2(I) chain OS=Gallus gallus GN=COL1A2 PE=4 SV=1	tr|F1P0H9|F1P0H9_CHICK	K.AADFGPGPM(+15.99)GLM(+15.99)GPR.G	Y	44.59	1504.68	15	1.5	753.348	2	27.11		F6:509	1	84	98	Oxidation (M)	M9:Oxidation (M):1000.00;M12:Oxidation (M):1000.00
4	20-HCl-D	HCl	20 mL/g	Demineralization	Dialysis	1	12	67	Collagen II, alpha 1	Collagen alpha-1(II) chain (Fragment) OS=Gallus gallus GN=COL2A1 PE=4 SV=2	tr|H9L2B7|H9L2B7_CHICK	R.GFP(+15.99)GLP(+15.99)GPSGEPGK.Q	N	33.45	1327.64	14	1	664.828	2	19.81		F5:280	4	814	827	Oxidation or Hydroxylation	P3:Oxidation or Hydroxylation:14.02;P6:Oxidation or Hydroxylation:45.01
4	20-HCl-D	HCl	20 mL/g	Demineralization	Dialysis	2	12	67	Collagen II, alpha 1	Collagen alpha-1(II) chain (Fragment) OS=Gallus gallus GN=COL2A1 PE=4 SV=2	tr|H9L2B7|H9L2B7_CHICK	R.GAPGERGEPGM(sub A)PGPAGFAGPP(+15.99)GADGQP(+15.99)GAK.G	Y	30.22	2718.25	30	-6.2	907.084	3	15.07		F6:154	1	640	669	Oxidation or Hydroxylation; Mutation	P21:Oxidation or Hydroxylation:38.16;P27:Oxidation or Hydroxylation:68.31
4	20-HCl-D	HCl	20 mL/g	Demineralization	Dialysis	2	12	67	Collagen II, alpha 1	Collagen alpha-1(II) chain (Fragment) OS=Gallus gallus GN=COL2A1 PE=4 SV=2	tr|H9L2B7|H9L2B7_CHICK	R.GLTGPIGP(+15.99)P(+15.99)GPAGPNGEKGQ(sub E)SGPPGPSGAAGAR.G	Y	16.51	2894.43	33	-3.2	965.813	3	16.81		F6:203	1	607	639	Oxidation or Hydroxylation; Mutation	P8:Oxidation or Hydroxylation:28.36;P9:Oxidation or Hydroxylation:14.04
4	20-HCl-D	HCl	20 mL/g	Demineralization	Dialysis	2	12	67	Collagen II, alpha 1	Collagen alpha-1(II) chain (Fragment) OS=Gallus gallus GN=COL2A1 PE=4 SV=2	tr|H9L2B7|H9L2B7_CHICK	R.GFP(+15.99)GLP(+15.99)GPSGEP(+15.99)GK.Q	N	35	1343.64	14	1	672.826	2	19.1		F6:274	3	814	827	Oxidation or Hydroxylation	P3:Oxidation or Hydroxylation:11.06;P6:Oxidation or Hydroxylation:36.05;P12:Oxidation or Hydroxylation:0.00
4	20-HCl-D	HCl	20 mL/g	Demineralization	Dialysis	1	33	43	Collagen IX, alpha 1	Alpha-1 type XI collagen (Fragment) OS=Gallus gallus PE=2 SV=1	tr|Q90796|Q90796_CHICK	K.FGFEVGPVC(+57.02)FLG	Y	43.74	1327.63	12	0.9	664.821	2	38.82		F5:664	1	877	888	Carbamidomethylation	C9:Carbamidomethylation:1000.00
4	20-HCl-D	HCl	20 mL/g	Demineralization	Dialysis	2	33	43	Collagen IX, alpha 1	Alpha-1 type XI collagen (Fragment) OS=Gallus gallus PE=2 SV=1	tr|Q90796|Q90796_CHICK	K.IDQVPIVDVMINDFGDQSQK.F	Y	13.68	2260.1	20	2.3	1131.06	2	35.57		F6:662	1	857	876
4	20-HCl-D	HCl	20 mL/g	Demineralization	Dialysis	2	31	72	Coag Factor IX	Coagulation factor IX OS=Gallus gallus GN=F9 PE=2 SV=1	Q804X6|FA9_CHICK	R.SAIVLQVLTVPFVDR.V	Y	29.1	1655.96	15	1.3	828.989	2	35.25		F6:659	2	375	389
4	20-HCl-D	HCl	20 mL/g	Demineralization	Dialysis	1	14	15	Cystatin	Cystatin OS=Gallus gallus PE=1 SV=2	P01038|CYT_CHICK	K.YILQVEIGR.T	Y	33.53	1089.62	9	0.9	545.817	2	25.27		F5:440	1	83	91
4	20-HCl-D	HCl	20 mL/g	Demineralization	Dialysis	2	14	15	Cystatin	Cystatin OS=Gallus gallus PE=1 SV=2	P01038|CYT_CHICK	R.LLGAPVPVDENDEGLQR.A	Y	46.73	1820.93	17	1.1	911.472	2	22.84		F6:389	3	30	46
4	20-HCl-D	HCl	20 mL/g	Demineralization	Dialysis	2	14	15	Cystatin	Cystatin OS=Gallus gallus PE=1 SV=2	P01038|CYT_CHICK	R.ALQFAMAEYNR.A	Y	48.87	1312.62	11	0.3	657.319	2	23.78		F6:416	2	47	57
4	20-HCl-D	HCl	20 mL/g	Demineralization	Dialysis	2	14	15	Cystatin	Cystatin OS=Gallus gallus PE=1 SV=2	P01038|CYT_CHICK	K.YTTCTFVVYSIPWLNQIK.L	Y	38.12	2175.11	18	1.2	1088.56	2	37.39		F6:685	2	115	132
4	20-HCl-D	HCl	20 mL/g	Demineralization	Dialysis	1	15	10	Decorin	Decorin OS=Gallus gallus GN=DCN PE=1 SV=1	P28675|PGS2_CHICK	K.ATYSGVSLFSNPVQYWEIQPSAFR.C	Y	46.97	2746.34	24	1.3	916.455	3	35.72		F5:633	1	320	343
4	20-HCl-D	HCl	20 mL/g	Demineralization	Dialysis	2	15	10	Decorin	Decorin OS=Gallus gallus GN=DCN PE=1 SV=1	P28675|PGS2_CHICK	K.ISPAAFAPLK.K	Y	41.86	1013.59	10	1.1	507.803	2	23.87		F6:419	1	118	127
4	20-HCl-D	HCl	20 mL/g	Demineralization	Dialysis	2	15	10	Decorin	Decorin OS=Gallus gallus GN=DCN PE=1 SV=1	P28675|PGS2_CHICK	K.IDAEGLSGLTNLAK.L	Y	52.56	1400.75	14	0.5	701.383	2	26.31		F6:487	2	234	247
4	20-HCl-D	HCl	20 mL/g	Demineralization	Dialysis	2	15	10	Decorin	Decorin OS=Gallus gallus GN=DCN PE=1 SV=1	P28675|PGS2_CHICK	K.IASIGINDFC(+57.02)PLGYNTK.K	Y	43.68	1881.93	17	1.4	941.973	2	28.65		F6:542	1	302	318	Carbamidomethylation	C10:Carbamidomethylation:1000.00
4	20-HCl-D	HCl	20 mL/g	Demineralization	Dialysis	2	15	10	Decorin	Decorin OS=Gallus gallus GN=DCN PE=1 SV=1	P28675|PGS2_CHICK	K.AVFNGLNQVIVLELGTNPLK.S	Y	34.11	2138.21	20	3.1	1070.12	2	36.32		F6:673	3	166	185
4	20-HCl-D	HCl	20 mL/g	Demineralization	Dialysis	1	8	13	Dentin Matrix Protein 1	Uncharacterized protein OS=Gallus gallus GN=DMP1 PE=4 SV=2	tr|F1NUV7|F1NUV7_CHICK	R.SAVSDLDT(+79.97)EEEQSR.S	Y	37.2	1644.65	14	1.5	823.334	2	16.24		F5:170	1	303	316	Phosphorylation (STY)	T8:Phosphorylation (STY):55.60
4	20-HCl-D	HCl	20 mL/g	Demineralization	Dialysis	1	8	13	Dentin Matrix Protein 1	Uncharacterized protein OS=Gallus gallus GN=DMP1 PE=4 SV=2	tr|F1NUV7|F1NUV7_CHICK	D.PSVFDSLGGR.H	Y	36.04	1033.52	10	0.6	517.767	2	23.18		F5:379	3	173	182
4	20-HCl-D	HCl	20 mL/g	Demineralization	Dialysis	1	8	13	Dentin Matrix Protein 1	Uncharacterized protein OS=Gallus gallus GN=DMP1 PE=4 SV=2	tr|F1NUV7|F1NUV7_CHICK	G.DDPSVFDS(+79.97)LGGR.H	Y	40.3	1343.54	12	0.3	672.777	2	23.45		F5:385	1	171	182	Phosphorylation (STY)	S8:Phosphorylation (STY):77.13
4	20-HCl-D	HCl	20 mL/g	Demineralization	Dialysis	2	8	13	Dentin Matrix Protein 1	Uncharacterized protein OS=Gallus gallus GN=DMP1 PE=4 SV=2	tr|F1NUV7|F1NUV7_CHICK	R.KQAAELDDDDC(+57.02)QDGY	Y	46.05	1741.67	15	1.1	871.845	2	15.52		F6:167	2	415	429	Carbamidomethylation	C11:Carbamidomethylation:1000.00
4	20-HCl-D	HCl	20 mL/g	Demineralization	Dialysis	2	8	13	Dentin Matrix Protein 1	Uncharacterized protein OS=Gallus gallus GN=DMP1 PE=4 SV=2	tr|F1NUV7|F1NUV7_CHICK	R.KQAAELDDDDCQD(+57.02)GY	Y	16.86	1741.67	15	1.2	871.845	2	15.94		F6:177	1	415	429	Carbamidomethylation (DHKE X@N-term)	D13:Carbamidomethylation (DHKE X@N-term):9.30
4	20-HCl-D	HCl	20 mL/g	Demineralization	Dialysis	2	8	13	Dentin Matrix Protein 1	Uncharacterized protein OS=Gallus gallus GN=DMP1 PE=4 SV=2	tr|F1NUV7|F1NUV7_CHICK	R.LHASMGPWDTGDADVAFGNHVER.D	Y	16.84	2481.11	23	2.5	828.047	3	23.65		F6:412	1	53	75
4	20-HCl-D	HCl	20 mL/g	Demineralization	Dialysis	2	8	13	Dentin Matrix Protein 1	Uncharacterized protein OS=Gallus gallus GN=DMP1 PE=4 SV=2	tr|F1NUV7|F1NUV7_CHICK	G.DDPSVFDSLGGR.H	Y	46.49	1263.57	12	0.7	632.794	2	24.04		F6:424	4	171	182
4	20-HCl-D	HCl	20 mL/g	Demineralization	Dialysis	2	8	13	Dentin Matrix Protein 1	Uncharacterized protein OS=Gallus gallus GN=DMP1 PE=4 SV=2	tr|F1NUV7|F1NUV7_CHICK	G.DDPSVF(+15.99)DSLGGR.H	Y	43.44	1279.57	12	1.8	640.792	2	24.15		F6:428	2	171	182	Oxidation or Hydroxylation	F6:Oxidation or Hydroxylation:30.46
4	20-HCl-D	HCl	20 mL/g	Demineralization	Dialysis	2	8	13	Dentin Matrix Protein 1	Uncharacterized protein OS=Gallus gallus GN=DMP1 PE=4 SV=2	tr|F1NUV7|F1NUV7_CHICK	G.DDPSVF(+31.99)DSLGGR.H	Y	35.9	1295.56	12	0.9	648.789	2	24.18		F6:429	2	171	182	Dihydroxy	F6:Dihydroxy:28.13
4	20-HCl-D	HCl	20 mL/g	Demineralization	Dialysis	2	8	13	Dentin Matrix Protein 1	Uncharacterized protein OS=Gallus gallus GN=DMP1 PE=4 SV=2	tr|F1NUV7|F1NUV7_CHICK	G.DVANALGPLLGDEDHGR.L	Y	39.02	1747.85	17	1.1	874.933	2	26.37		F6:489	4	36	52
4	20-HCl-D	HCl	20 mL/g	Demineralization	Dialysis	2	16	12	Extracellular Fatty Acid-binding protein	Uncharacterized protein OS=Gallus gallus GN=LCN8 PE=3 SV=2	tr|E1C0K1|E1C0K1_CHICK	K.SYAVIFATR.V	Y	38.04	1026.55	9	0.3	514.282	2	23.84		F6:418	1	115	123
4	20-HCl-D	HCl	20 mL/g	Demineralization	Dialysis	2	16	12	Extracellular Fatty Acid-binding protein	Uncharacterized protein OS=Gallus gallus GN=LCN8 PE=3 SV=2	tr|E1C0K1|E1C0K1_CHICK	R.EVSPTAMAIFR.K	Y	46.36	1220.62	11	0.9	611.319	2	26.72		F6:499	2	141	151
4	20-HCl-D	HCl	20 mL/g	Demineralization	Dialysis	2	16	12	Extracellular Fatty Acid-binding protein	Uncharacterized protein OS=Gallus gallus GN=LCN8 PE=3 SV=2	tr|E1C0K1|E1C0K1_CHICK	K.WYIVALASNTDFFLR.E	Y	41.56	1814.94	15	1.7	908.477	2	37.49		F6:687	3	34	48
4	20-HCl-D	HCl	20 mL/g	Demineralization	Dialysis	1	32	77	Gallinacin-7	Gallinacin-7 OS=Gallus gallus GN=GAL7 PE=2 SV=1	Q6QLR2|GLL7_CHICK	G.Q(-17.03)PFIPRPIDTC(+57.02)R.L	Y	27.45	1481.74	12	0.9	741.88	2	25.24		F5:439	2	21	32	Pyro-glu from Q; Carbamidomethylation	Q1:Pyro-glu from Q:1000.00;C11:Carbamidomethylation:1000.00
4	20-HCl-D	HCl	20 mL/g	Demineralization	Dialysis	1	27	38	Gremlin-1	Gremlin-1 OS=Gallus gallus GN=GREM1 PE=2 SV=1	O73755|GREM1_CHICK	R.C(+57.02)ISIDLD	Y	24.12	834.379	7	1.4	835.388	1	25.74		F5:452	1	178	184	Carbamidomethylation	C1:Carbamidomethylation:1000.00
4	20-HCl-D	HCl	20 mL/g	Demineralization	Dialysis	2	27	38	Gremlin-1	Gremlin-1 OS=Gallus gallus GN=GREM1 PE=2 SV=1	O73755|GREM1_CHICK	R.FC(+57.02)YGQC(+57.02)NSFYIPR.H	Y	46.62	1710.73	13	1.6	856.373	2	25.29		F6:462	1	117	129	Carbamidomethylation	C2:Carbamidomethylation:1000.00;C6:Carbamidomethylation:1000.00
4	20-HCl-D	HCl	20 mL/g	Demineralization	Dialysis	1	28	45	Hemoglobin A	Hemoglobin subunit alpha-A OS=Gallus gallus GN=HBAA PE=1 SV=2	P01994|HBA_CHICK	K.VVAALIEAANHIDDIAGTLSK.L	Y	50.12	2120.15	21	0.5	707.723	3	33.6		F5:604	2	63	83
4	20-HCl-D	HCl	20 mL/g	Demineralization	Dialysis	1	18	28	Histone 2A	Histone H2A-III OS=Gallus gallus PE=1 SV=2	P35062|H2A3_CHICK	K.VTIAQGGVLPNIQAVLLP.K	Y	18.92	1802.07	18	2	902.042	2	37.8		F5:656	1	101	118
4	20-HCl-D	HCl	20 mL/g	Demineralization	Dialysis	2	18	28	Histone 2A	Histone H2A-III OS=Gallus gallus PE=1 SV=2	P35062|H2A3_CHICK	R.AGLQFPVGR.V	Y	37.61	943.524	9	0.8	472.77	2	22.38		F6:375	2	22	30
4	20-HCl-D	HCl	20 mL/g	Demineralization	Dialysis	2	18	28	Histone 2A	Histone H2A-III OS=Gallus gallus PE=1 SV=2	P35062|H2A3_CHICK	K.VTIAQGGVLPNIQAVLLPK.K	Y	37.49	1930.16	19	1.8	966.09	2	33.24		F6:623	2	101	119
4	20-HCl-D	HCl	20 mL/g	Demineralization	Dialysis	1	17	41	Histone 2B	Histone H2B 1/2/3/4/6 OS=Gallus gallus GN=H2B-I PE=1 SV=2	P0C1H3|H2B1_CHICK	K.AM(+15.99)GIMNSFVNDIFER.I	Y	49.05	1758.81	15	2	880.413	2	33.97		F5:611	2	59	73	Oxidation (M)	M2:Oxidation (M):38.16
4	20-HCl-D	HCl	20 mL/g	Demineralization	Dialysis	1	17	41	Histone 2B	Histone H2B 1/2/3/4/6 OS=Gallus gallus GN=H2B-I PE=1 SV=2	P0C1H3|H2B1_CHICK	K.AM(+15.99)GIM(+15.99)NSFVNDIF.E	Y	15.22	1489.66	13	0.6	745.837	2	34.14		F5:614	1	59	71	Oxidation (M)	M2:Oxidation (M):1000.00;M5:Oxidation (M):1000.00
4	20-HCl-D	HCl	20 mL/g	Demineralization	Dialysis	1	17	41	Histone 2B	Histone H2B 1/2/3/4/6 OS=Gallus gallus GN=H2B-I PE=1 SV=2	P0C1H3|H2B1_CHICK	K.AM(+15.99)GIMNSFVNDIF.E	Y	29.41	1473.66	13	0.6	737.839	2	37.74		F5:655	1	59	71	Oxidation (M)	M2:Oxidation (M):16.66
4	20-HCl-D	HCl	20 mL/g	Demineralization	Dialysis	2	17	41	Histone 2B	Histone H2B 1/2/3/4/6 OS=Gallus gallus GN=H2B-I PE=1 SV=2	P0C1H3|H2B1_CHICK	R.LLLPGELAK.H	Y	15.55	952.596	9	0.4	477.305	2	24.38		F6:435	3	101	109
4	20-HCl-D	HCl	20 mL/g	Demineralization	Dialysis	2	17	41	Histone 2B	Histone H2B 1/2/3/4/6 OS=Gallus gallus GN=H2B-I PE=1 SV=2	P0C1H3|H2B1_CHICK	K.AM(+15.99)GIM(+15.99)NSFVNDIFER.I	Y	42.29	1774.8	15	0.6	888.409	2	30.07		F6:569	2	59	73	Oxidation (M)	M2:Oxidation (M):1000.00;M5:Oxidation (M):1000.00
4	20-HCl-D	HCl	20 mL/g	Demineralization	Dialysis	2	29	49	Histone 3.2	Histone H3.2 OS=Gallus gallus GN=H3-I PE=1 SV=2	P84229|H32_CHICK	R.FQSSAVM(+15.99)ALQEASEAYLVGLFEDTNLC(+57.02)AIHAK.R	Y	44.58	3528.69	32	0.9	1177.24	3	40.23		F6:712	2	85	116	Oxidation (M); Carbamidomethylation	M7:Oxidation (M):1000.00;C27:Carbamidomethylation:1000.00
4	20-HCl-D	HCl	20 mL/g	Demineralization	Dialysis	2	36	74	Histone 4	Histone H4 OS=Gallus gallus GN=H4-I PE=1 SV=2	P62801|H4_CHICK	K.VFLENVIR.D	Y	29.64	988.571	8	0.5	495.293	2	25.68		F6:474	1	61	68
4	20-HCl-D	HCl	20 mL/g	Demineralization	Dialysis	2	22	35	Lumican	Lumican OS=Gallus gallus GN=LUM PE=1 SV=1	P51890|LUM_CHICK	R.ADLPQEMYNC(+57.02)LR.V	Y	29.71	1508.68	12	1.7	755.346	2	26.14		F6:483	2	324	335	Carbamidomethylation	C10:Carbamidomethylation:1000.00
4	20-HCl-D	HCl	20 mL/g	Demineralization	Dialysis	2	22	35	Lumican	Lumican OS=Gallus gallus GN=LUM PE=1 SV=1	P51890|LUM_CHICK	K.GLNSLLYLDLSFNQLTK.L	Y	38.01	1938.05	17	0.5	970.031	2	37.14		F6:682	1	187	203
4	20-HCl-D	HCl	20 mL/g	Demineralization	Dialysis	2	34	51	Lysozyme C	Lysozyme C OS=Gallus gallus GN=LYZ PE=1 SV=1	P00698|LYSC_CHICK	R.NTDGSTDYGILQINSR.W	Y	44.35	1752.83	16	1.7	877.423	2	23.45		F6:407	1	64	79
4	20-HCl-D	HCl	20 mL/g	Demineralization	Dialysis	1	9	25	Matrix Gla	Matrix Gla protein OS=Gallus gallus GN=MGP PE=2 SV=1	O42413|MGP_CHICK	R.AN(+.98)GFIRDDTGL.R	Y	36.21	1178.56	11	0.7	590.286	2	22.9		F5:371	4	41	51	Deamidation (NQ)	N2:Deamidation (NQ):1000.00
4	20-HCl-D	HCl	20 mL/g	Demineralization	Dialysis	1	9	25	Matrix Gla	Matrix Gla protein OS=Gallus gallus GN=MGP PE=2 SV=1	O42413|MGP_CHICK	M.ESHEYLNPFLNR.Q	Y	40.77	1517.73	12	0.6	759.871	2	23.84		F5:396	1	27	38
4	20-HCl-D	HCl	20 mL/g	Demineralization	Dialysis	2	9	25	Matrix Gla	Matrix Gla protein OS=Gallus gallus GN=MGP PE=2 SV=1	O42413|MGP_CHICK	R.AN(+.98)GFIRDDTGLR.A	Y	36.99	1334.66	12	0.3	445.893	3	18.33		F6:250	5	41	52	Deamidation (NQ)	N2:Deamidation (NQ):1000.00
4	20-HCl-D	HCl	20 mL/g	Demineralization	Dialysis	2	9	25	Matrix Gla	Matrix Gla protein OS=Gallus gallus GN=MGP PE=2 SV=1	O42413|MGP_CHICK	C.YE(+43.99)SHESMESHEYLNPFLNR.Q	Y	37.9	2425.03	19	1.8	809.351	3	24.93		F6:453	2	20	38	Carboxylation (E)	E2:Carboxylation (E):0.00
4	20-HCl-D	HCl	20 mL/g	Demineralization	Dialysis	1	19	37	Osteocalcin	Osteocalcin OS=Gallus gallus GN=BGLAP PE=1 SV=2	P02822|OSTCN_CHICK	R.EVC(+57.02)ELSPDC(+57.02)DELADQIGFQEAYRR.F	Y	28.91	2899.28	24	1.1	967.433	3	25.97		F5:458	3	69	92	Carbamidomethylation	C3:Carbamidomethylation:1000.00;C9:Carbamidomethylation:1000.00
4	20-HCl-D	HCl	20 mL/g	Demineralization	Dialysis	2	19	37	Osteocalcin	Osteocalcin OS=Gallus gallus GN=BGLAP PE=1 SV=2	P02822|OSTCN_CHICK	R.FYGPV	Y	26.63	581.285	5	1.2	582.293	1	42.38		F6:731	2	93	97
4	20-HCl-D	HCl	20 mL/g	Demineralization	Dialysis	1	25	36	Osteomodulin	Uncharacterized protein OS=Gallus gallus GN=OMD PE=4 SV=1	tr|R4GF52|R4GF52_CHICK	K.LTTPISTYAFFC(+57.02)FPHIR.T	Y	27.36	2070.04	17	0.6	691.021	3	32.71		F5:585	1	342	358	Carbamidomethylation	C12:Carbamidomethylation:1000.00
4	20-HCl-D	HCl	20 mL/g	Demineralization	Dialysis	1	25	36	Osteomodulin	Uncharacterized protein OS=Gallus gallus GN=OMD PE=4 SV=1	tr|R4GF52|R4GF52_CHICK	R.NTFISLPNLIELNLGHNK.L	Y	28.57	2036.11	18	1	679.71	3	33.15		F5:595	2	274	291
4	20-HCl-D	HCl	20 mL/g	Demineralization	Dialysis	1	7	8	Osteonectin	SPARC OS=Gallus gallus GN=SPARC PE=4 SV=1	tr|F1P291|F1P291_CHICK	R.LEAGDHTVELLAR.D	Y	47.49	1422.75	13	1.2	712.381	2	19.98		F5:286	5	201	213
4	20-HCl-D	HCl	20 mL/g	Demineralization	Dialysis	1	7	8	Osteonectin	SPARC OS=Gallus gallus GN=SPARC PE=4 SV=1	tr|F1P291|F1P291_CHICK	K.EQDIDKDLVI	Y	30.3	1186.61	10	0.5	594.312	2	24.94		F5:430	4	289	298
4	20-HCl-D	HCl	20 mL/g	Demineralization	Dialysis	1	7	8	Osteonectin	SPARC OS=Gallus gallus GN=SPARC PE=4 SV=1	tr|F1P291|F1P291_CHICK	K.FIPAC(+57.02)LDTELTEFPLR.M	Y	49.98	1920.97	16	1.2	961.491	2	32.65		F5:583	8	146	161	Carbamidomethylation	C5:Carbamidomethylation:1000.00
4	20-HCl-D	HCl	20 mL/g	Demineralization	Dialysis	1	7	8	Osteonectin	SPARC OS=Gallus gallus GN=SPARC PE=4 SV=1	tr|F1P291|F1P291_CHICK	R.FFEAC(+57.02)DLDNDKYIALEEWASC(+57.02)FGIK.E	Y	38.12	3040.36	25	1.6	1014.46	3	35.95		F5:636	2	264	288	Carbamidomethylation	C5:Carbamidomethylation:1000.00;C21:Carbamidomethylation:1000.00
4	20-HCl-D	HCl	20 mL/g	Demineralization	Dialysis	2	7	8	Osteonectin	SPARC OS=Gallus gallus GN=SPARC PE=4 SV=1	tr|F1P291|F1P291_CHICK	K.LHLDYIGPC(+57.02)K.F	Y	42.18	1214.61	10	0.6	608.313	2	19.62		F6:291	3	136	145	Carbamidomethylation	C9:Carbamidomethylation:1000.00
4	20-HCl-D	HCl	20 mL/g	Demineralization	Dialysis	2	7	8	Osteonectin	SPARC OS=Gallus gallus GN=SPARC PE=4 SV=1	tr|F1P291|F1P291_CHICK	K.NVLITLYERDEDNNLLTEK.Q	Y	43.03	2291.16	19	1.3	764.73	3	27.34		F6:514	4	168	186
4	20-HCl-D	HCl	20 mL/g	Demineralization	Dialysis	2	7	8	Osteonectin	SPARC OS=Gallus gallus GN=SPARC PE=4 SV=1	tr|F1P291|F1P291_CHICK	K.NVLITLY(+31.99)ERDEDNNLLTEK.Q	Y	29.06	2323.15	19	-0.8	775.391	3	27.52		F6:519	1	168	186	Dihydroxy	Y7:Dihydroxy:0.00
4	20-HCl-D	HCl	20 mL/g	Demineralization	Dialysis	2	7	8	Osteonectin	SPARC OS=Gallus gallus GN=SPARC PE=4 SV=1	tr|F1P291|F1P291_CHICK	K.NVLITLYERD(+14.02)EDNN(+.98)LLTEK.Q	Y	14.34	2306.16	19	-7.4	769.723	3	27.56		F6:520	1	168	186	Methyl ester; Deamidation (NQ)	D10:Methyl ester:0.00;N14:Deamidation (NQ):0.00
4	20-HCl-D	HCl	20 mL/g	Demineralization	Dialysis	2	7	8	Osteonectin	SPARC OS=Gallus gallus GN=SPARC PE=4 SV=1	tr|F1P291|F1P291_CHICK	K.NYNMYIFPVHWQFGQLDQHPIDGYLSHTELAPLR.A	Y	61.83	4098.98	34	0.2	1025.75	4	32.34		F6:605	2	218	251
4	20-HCl-D	HCl	20 mL/g	Demineralization	Dialysis	2	7	8	Osteonectin	SPARC OS=Gallus gallus GN=SPARC PE=4 SV=1	tr|F1P291|F1P291_CHICK	K.NYNM(+15.99)YIFP(+15.99)VHWQF(+15.99)GQLDQHPIDGYLSHTELAPLR.A	Y	36.54	4146.97	34	-1	830.4	5	32.52		F6:608	1	218	251	Oxidation (M); Oxidation or Hydroxylation	M4:Oxidation (M):1000.00;P8:Oxidation or Hydroxylation:3.75;F13:Oxidation or Hydroxylation:6.65
4	20-HCl-D	HCl	20 mL/g	Demineralization	Dialysis	2	7	8	Osteonectin	SPARC OS=Gallus gallus GN=SPARC PE=4 SV=1	tr|F1P291|F1P291_CHICK	R.FFEAC(+57.02)DLDN(+.98)DKYIALEEWASC(+57.02)FGIK.E	Y	29.89	3041.35	25	5.3	1014.79	3	36.67		F6:678	2	264	288	Carbamidomethylation; Deamidation (NQ)	C5:Carbamidomethylation:1000.00;N9:Deamidation (NQ):1000.00;C21:Carbamidomethylation:1000.00
4	20-HCl-D	HCl	20 mL/g	Demineralization	Dialysis	1	10	17	Osteopontin	Osteopontin OS=Gallus gallus GN=SPP1 PE=2 SV=3	P23498|OSTP_CHICK	R.GDSVAYGFR.A	Y	39.8	970.451	9	0.4	486.233	2	18.35		F5:234	2	139	147
4	20-HCl-D	HCl	20 mL/g	Demineralization	Dialysis	1	10	17	Osteopontin	Osteopontin OS=Gallus gallus GN=SPP1 PE=2 SV=3	P23498|OSTP_CHICK	R.KLIEDDATAEVGDSQL.A	Y	34.1	1702.83	16	-0.4	852.42	2	21.94		F5:345	2	164	179
4	20-HCl-D	HCl	20 mL/g	Demineralization	Dialysis	1	10	17	Osteopontin	Osteopontin OS=Gallus gallus GN=SPP1 PE=2 SV=3	P23498|OSTP_CHICK	R.KLIEDDATAEVGDSQLAGLWLPK.E	Y	35.43	2468.28	23	1.2	823.768	3	29.61		F5:538	2	164	186
4	20-HCl-D	HCl	20 mL/g	Demineralization	Dialysis	1	10	17	Osteopontin	Osteopontin OS=Gallus gallus GN=SPP1 PE=2 SV=3	P23498|OSTP_CHICK	R.KLIEDDAT(+79.97)AEVGDSQLAGLWLPK.E	Y	36.18	2548.25	23	1.5	850.424	3	31.22		F5:565	1	164	186	Phosphorylation (STY)	T8:Phosphorylation (STY):16.36
4	20-HCl-D	HCl	20 mL/g	Demineralization	Dialysis	2	10	17	Osteopontin	Osteopontin OS=Gallus gallus GN=SPP1 PE=2 SV=3	P23498|OSTP_CHICK	R.KLIEDDAT(+79.97)AEVGDSQL.A	Y	43.49	1782.79	16	1.2	892.404	2	23.21		F6:401	3	164	179	Phosphorylation (STY)	T8:Phosphorylation (STY):143.82
4	20-HCl-D	HCl	20 mL/g	Demineralization	Dialysis	2	10	17	Osteopontin	Osteopontin OS=Gallus gallus GN=SPP1 PE=2 SV=3	P23498|OSTP_CHICK	K.LIEDDATAEVGDSQLAGLWLPK.E	Y	36.04	2340.18	22	0.8	781.069	3	32.38		F6:606	2	165	186
4	20-HCl-D	HCl	20 mL/g	Demineralization	Dialysis	1	13	19	Pigment Epithelium Derived Factor	Uncharacterized protein OS=Gallus gallus GN=SERPINF1 PE=3 SV=1	tr|E1C7H6|E1C7H6_CHICK	K.LAAAVSNFGYDLYR.Q	Y	49.46	1558.78	14	1.6	780.398	2	27.15		F5:487	1	52	65
4	20-HCl-D	HCl	20 mL/g	Demineralization	Dialysis	1	13	19	Pigment Epithelium Derived Factor	Uncharacterized protein OS=Gallus gallus GN=SERPINF1 PE=3 SV=1	tr|E1C7H6|E1C7H6_CHICK	R.LTFPIEYHVDRPFLLVLR.D	Y	28.32	2227.25	18	1.2	557.821	4	32.34		F5:578	3	385	402
4	20-HCl-D	HCl	20 mL/g	Demineralization	Dialysis	1	13	19	Pigment Epithelium Derived Factor	Uncharacterized protein OS=Gallus gallus GN=SERPINF1 PE=3 SV=1	tr|E1C7H6|E1C7H6_CHICK	R.TATANVLLSPFSLATALSGLSLGAGER.T	Y	37.08	2616.41	27	0.5	1309.21	2	41.15		F5:683	4	71	97
4	20-HCl-D	HCl	20 mL/g	Demineralization	Dialysis	2	13	19	Pigment Epithelium Derived Factor	Uncharacterized protein OS=Gallus gallus GN=SERPINF1 PE=3 SV=1	tr|E1C7H6|E1C7H6_CHICK	R.TATANVLLSPFSLATALSGLSLGAGERTEDVISR.A	Y	15.82	3416.81	34	1.7	1139.95	3	39.25		F6:703	1	71	104
4	20-HCl-D	HCl	20 mL/g	Demineralization	Dialysis	1	21	23	PIT 54	Uncharacterized protein OS=Gallus gallus GN=PIT54 PE=4 SV=2	tr|H9KZK6|H9KZK6_CHICK	R.VEVLHNDVWGTVC(+57.02)DEGWDLR.E	Y	21.32	2398.1	20	0.1	800.374	3	28.83		F5:524	2	80	99	Carbamidomethylation	C13:Carbamidomethylation:1000.00
4	20-HCl-D	HCl	20 mL/g	Demineralization	Dialysis	2	21	23	PIT 54	Uncharacterized protein OS=Gallus gallus GN=PIT54 PE=4 SV=2	tr|H9KZK6|H9KZK6_CHICK	K.QLGC(+57.02)GDAVLAPIAAK.F	Y	40.37	1482.79	15	1.2	742.401	2	22.99		F6:394	1	217	231	Carbamidomethylation	C4:Carbamidomethylation:1000.00
4	20-HCl-D	HCl	20 mL/g	Demineralization	Dialysis	2	21	23	PIT 54	Uncharacterized protein OS=Gallus gallus GN=PIT54 PE=4 SV=2	tr|H9KZK6|H9KZK6_CHICK	K.GQIWLSDLDC(+57.02)K.G	Y	42.51	1333.63	11	0.8	667.825	2	26.41		F6:490	1	127	137	Carbamidomethylation	C10:Carbamidomethylation:1000.00
4	20-HCl-D	HCl	20 mL/g	Demineralization	Dialysis	1	35	55	Ribonucleause homolog	Ribonuclease homolog OS=Gallus gallus PE=2 SV=1	P30374|RSFR_CHICK	G.VPTYQDFLYK.H	Y	41.5	1272.64	10	0.9	637.327	2	26.26		F5:465	1	24	33
4	20-HCl-D	HCl	20 mL/g	Demineralization	Dialysis	1	23	44	Serpin H1	Serpin H1 OS=Gallus gallus GN=SERPINH1 PE=1 SV=2	P13731|SERPH_CHICK	K.DKNM(+15.99)ENILLSPVVVASSLGLVSLGGK.A	Y	45.97	2655.45	26	1.7	886.159	3	37.67		F5:654	1	48	73	Oxidation (M)	M4:Oxidation (M):1000.00
4	20-HCl-D	HCl	20 mL/g	Demineralization	Dialysis	2	23	44	Serpin H1	Serpin H1 OS=Gallus gallus GN=SERPINH1 PE=1 SV=2	P13731|SERPH_CHICK	K.DK(+15.99)NMENILLSPVVVASSLGLVSLGGK.A	Y	48.61	2655.45	26	0.1	886.158	3	37.64		F6:689	1	48	73	Oxidation or Hydroxylation	K2:Oxidation or Hydroxylation:0.00
4	20-HCl-D	HCl	20 mL/g	Demineralization	Dialysis	2	23	44	Serpin H1	Serpin H1 OS=Gallus gallus GN=SERPINH1 PE=1 SV=2	P13731|SERPH_CHICK	K.DKNMENILLSPVVVASSLGLVSLGGK.A	Y	44.92	2639.46	26	0.9	880.827	3	39.33		F6:704	1	48	73
4	20-HCl-D	HCl	20 mL/g	Demineralization	Dialysis	1	5	3	Serum Albumin	Serum albumin OS=Gallus gallus GN=ALB PE=1 SV=2	P19121|ALBU_CHICK	R.ATLGIGA	N	32.83	601.343	7	1	602.351	1	20.04		F5:288	1	609	615
4	20-HCl-D	HCl	20 mL/g	Demineralization	Dialysis	1	5	3	Serum Albumin	Serum albumin OS=Gallus gallus GN=ALB PE=1 SV=2	P19121|ALBU_CHICK	R.SQC(+57.02)IM(+15.99)EAEFDEKPADLPSLVEK.Y	N	51.38	2551.18	22	0.5	851.402	3	24.6		F5:420	3	315	336	Carbamidomethylation; Oxidation (M)	C3:Carbamidomethylation:1000.00;M5:Oxidation (M):1000.00
4	20-HCl-D	HCl	20 mL/g	Demineralization	Dialysis	1	5	3	Serum Albumin	Serum albumin OS=Gallus gallus GN=ALB PE=1 SV=2	P19121|ALBU_CHICK	K.QSDINTC(+57.02)FGEEGANLIVQSR.A	N	43.02	2237.04	20	1.1	1119.53	2	26		F5:459	4	589	608	Carbamidomethylation	C7:Carbamidomethylation:1000.00
4	20-HCl-D	HCl	20 mL/g	Demineralization	Dialysis	1	5	3	Serum Albumin	Serum albumin OS=Gallus gallus GN=ALB PE=1 SV=2	P19121|ALBU_CHICK	K.LLINLIK.R	N	17.84	825.569	7	0.9	413.792	2	28.01		F5:504	1	556	562
4	20-HCl-D	HCl	20 mL/g	Demineralization	Dialysis	1	5	3	Serum Albumin	Serum albumin OS=Gallus gallus GN=ALB PE=1 SV=2	P19121|ALBU_CHICK	K.YVPPPFNPDMFSFDEK(+15.99).L	N	14.95	1944.86	16	2.4	973.44	2	29.77		F5:541	1	525	540	Oxidation or Hydroxylation	K16:Oxidation or Hydroxylation:7.38
4	20-HCl-D	HCl	20 mL/g	Demineralization	Dialysis	2	4	2	Serum Albumin	Serum albumin OS=Gallus gallus GN=ALB PE=4 SV=2	tr|F2Z4L6|F2Z4L6_CHICK	R.KQETTPINDNVSQC(+57.02)C(+57.02)SSSYANR.R	Y	50.03	2558.11	22	1.5	853.713	3	14.58		F6:141	2	441	462	Carbamidomethylation	C14:Carbamidomethylation:1000.00;C15:Carbamidomethylation:1000.00
4	20-HCl-D	HCl	20 mL/g	Demineralization	Dialysis	2	5	3	Serum Albumin	Serum albumin OS=Gallus gallus GN=ALB PE=1 SV=2	P19121|ALBU_CHICK	K.LC(+57.02)SAPAEEREVGQMK.L	N	27.8	1703.8	15	0.6	568.94	3	14.87		F6:148	1	541	555	Carbamidomethylation	C2:Carbamidomethylation:1000.00
4	20-HCl-D	HCl	20 mL/g	Demineralization	Dialysis	2	5	3	Serum Albumin	Serum albumin OS=Gallus gallus GN=ALB PE=1 SV=2	P19121|ALBU_CHICK	K.LVKDVVDLAQK.C	N	46.37	1226.72	11	0.7	614.369	2	18.02		F6:240	3	69	79
4	20-HCl-D	HCl	20 mL/g	Demineralization	Dialysis	2	5	3	Serum Albumin	Serum albumin OS=Gallus gallus GN=ALB PE=1 SV=2	P19121|ALBU_CHICK	K.GYESLLEK.C	N	27.98	937.476	8	1.5	938.484	1	20.54		F6:320	2	380	387
4	20-HCl-D	HCl	20 mL/g	Demineralization	Dialysis	2	5	3	Serum Albumin	Serum albumin OS=Gallus gallus GN=ALB PE=1 SV=2	P19121|ALBU_CHICK	K.TDNPAEC(+57.02)YANAQEQLNQHIK.E	N	46.85	2343.05	20	1	782.026	3	21.92		F6:362	2	391	410	Carbamidomethylation	C7:Carbamidomethylation:1000.00
4	20-HCl-D	HCl	20 mL/g	Demineralization	Dialysis	2	5	3	Serum Albumin	Serum albumin OS=Gallus gallus GN=ALB PE=1 SV=2	P19121|ALBU_CHICK	K.VSQPDFVQPYQRPASDVIC(+57.02)QEYQDNR.V	N	35.87	3138.45	26	0.2	1047.16	3	23.17		F6:400	2	134	159	Carbamidomethylation	C19:Carbamidomethylation:1000.00
4	20-HCl-D	HCl	20 mL/g	Demineralization	Dialysis	2	5	3	Serum Albumin	Serum albumin OS=Gallus gallus GN=ALB PE=1 SV=2	P19121|ALBU_CHICK	K.QQYFC(+57.02)GILK.Q	N	34.55	1155.57	9	1.2	578.795	2	24.41		F6:436	2	224	232	Carbamidomethylation	C5:Carbamidomethylation:1000.00
4	20-HCl-D	HCl	20 mL/g	Demineralization	Dialysis	2	5	3	Serum Albumin	Serum albumin OS=Gallus gallus GN=ALB PE=1 SV=2	P19121|ALBU_CHICK	K.TIADGFTAMVDK.C	N	49.2	1267.61	12	0.8	634.814	2	25.23		F6:460	3	574	585
4	20-HCl-D	HCl	20 mL/g	Demineralization	Dialysis	2	5	3	Serum Albumin	Serum albumin OS=Gallus gallus GN=ALB PE=1 SV=2	P19121|ALBU_CHICK	K.TIADGFTAM(+15.99)VDK.C	N	42.19	1283.61	12	0.2	642.811	2	25.37		F6:464	1	574	585	Oxidation (M)	M9:Oxidation (M):1000.00
4	20-HCl-D	HCl	20 mL/g	Demineralization	Dialysis	2	5	3	Serum Albumin	Serum albumin OS=Gallus gallus GN=ALB PE=1 SV=2	P19121|ALBU_CHICK	R.SQC(+57.02)IMEAEFDEKPADLPSLVEK.Y	N	41.68	2535.19	22	0.8	846.07	3	26.91		F6:503	2	315	336	Carbamidomethylation	C3:Carbamidomethylation:1000.00
4	20-HCl-D	HCl	20 mL/g	Demineralization	Dialysis	2	5	3	Serum Albumin	Serum albumin OS=Gallus gallus GN=ALB PE=1 SV=2	P19121|ALBU_CHICK	K.YVPPPFNPDM(+15.99)FSFDEK.L	N	44.44	1944.86	16	1.7	649.295	3	29.24		F6:554	5	525	540	Oxidation (M)	M10:Oxidation (M):1000.00
4	20-HCl-D	HCl	20 mL/g	Demineralization	Dialysis	2	5	3	Serum Albumin	Serum albumin OS=Gallus gallus GN=ALB PE=1 SV=2	P19121|ALBU_CHICK	R.VSFLGHFIYSVAR.R	N	45.19	1494.8	13	1	748.407	2	30.11		F6:570	4	160	172
4	20-HCl-D	HCl	20 mL/g	Demineralization	Dialysis	2	5	3	Serum Albumin	Serum albumin OS=Gallus gallus GN=ALB PE=1 SV=2	P19121|ALBU_CHICK	K.SFEAGHDAFMAEFVYEYSR.R	N	32.9	2254.96	19	1.6	752.663	3	30.69		F6:581	1	346	364
4	20-HCl-D	HCl	20 mL/g	Demineralization	Dialysis	2	5	3	Serum Albumin	Serum albumin OS=Gallus gallus GN=ALB PE=1 SV=2	P19121|ALBU_CHICK	K.AVAMITFAQYLQR.C	Y	48.2	1510.8	13	1.4	756.407	2	31.93		F6:598	1	48	60
4	20-HCl-D	HCl	20 mL/g	Demineralization	Dialysis	2	5	3	Serum Albumin	Serum albumin OS=Gallus gallus GN=ALB PE=1 SV=2	P19121|ALBU_CHICK	K.YVPPPFNPDMFSFDEK.L	N	45.64	1928.87	16	0.7	643.963	3	32.19		F6:601	4	525	540
4	20-HCl-D	HCl	20 mL/g	Demineralization	Dialysis	2	5	3	Serum Albumin	Serum albumin OS=Gallus gallus GN=ALB PE=1 SV=2	P19121|ALBU_CHICK	K.C(+57.02)VANEDAPEC(+57.02)SKPLPSIILDEIC(+57.02)QVEK.L	N	43.19	3113.47	27	1.5	1038.83	3	33.61		F6:631	6	80	106	Carbamidomethylation	C1:Carbamidomethylation:1000.00;C10:Carbamidomethylation:1000.00;C23:Carbamidomethylation:1000.00
4	20-HCl-D	HCl	20 mL/g	Demineralization	Dialysis	2	5	3	Serum Albumin	Serum albumin OS=Gallus gallus GN=ALB PE=1 SV=2	P19121|ALBU_CHICK	K.C(+57.02)VANEDAPEC(+57.02)SKT(sub P)LPSIILDEIC(+57.02)QVEK.L	N	21.14	3117.47	27	5.8	1040.17	3	33.93		F6:638	1	80	106	Carbamidomethylation; Mutation	C1:Carbamidomethylation:1000.00;C10:Carbamidomethylation:1000.00;C23:Carbamidomethylation:1000.00
4	20-HCl-D	HCl	20 mL/g	Demineralization	Dialysis	2	5	3	Serum Albumin	Serum albumin OS=Gallus gallus GN=ALB PE=1 SV=2	P19121|ALBU_CHICK	F.LYAPAILSFAVDFEHALQSC(+57.02)C(+57.02)K.E	N	23.13	2539.22	22	1.2	847.416	3	40.37		F6:714	1	177	198	Carbamidomethylation	C20:Carbamidomethylation:1000.00;C21:Carbamidomethylation:1000.00
4	20-HCl-D	HCl	20 mL/g	Demineralization	Dialysis	1	20	27	Secreted Phosphoprotein 24	Secreted phosphoprotein 24 OS=Gallus gallus GN=SPP2 PE=2 SV=1	Q710A0|SPP24_CHICK	K.VGPFVPTAVCK(+57.02).S	Y	14.31	1173.62	11	1	587.819	2	21.51		F5:334	1	107	117	Carbamidomethylation (DHKE X@N-term)	K11:Carbamidomethylation (DHKE X@N-term):32.22
4	20-HCl-D	HCl	20 mL/g	Demineralization	Dialysis	2	20	27	Secreted Phosphoprotein 24	Secreted phosphoprotein 24 OS=Gallus gallus GN=SPP2 PE=2 SV=1	Q710A0|SPP24_CHICK	K.VGPFVPTAVC(+57.02)K.S	Y	41.37	1173.62	11	0.9	587.819	2	21.06		F6:337	2	107	117	Carbamidomethylation	C10:Carbamidomethylation:1000.00
4	20-HCl-D	HCl	20 mL/g	Demineralization	Dialysis	2	20	27	Secreted Phosphoprotein 24	Secreted phosphoprotein 24 OS=Gallus gallus GN=SPP2 PE=2 SV=1	Q710A0|SPP24_CHICK	R.INSQTWGPNLYGVVR.S	Y	34.51	1702.88	15	0.5	852.447	2	26.66		F6:497	2	51	65
4	20-HCl-D	HCl	20 mL/g	Demineralization	Dialysis	1	26	34	Tetranectin	Tetranectin OS=Gallus gallus GN=CLEC3B PE=2 SV=1	tr|Q9DDD4|Q9DDD4_CHICK	K.SIGNEAEIWLGLNDMVAEGK.W	Y	29.55	2145.04	20	0.4	1073.53	2	34.74		F5:622	1	123	142
4	20-HCl-D	HCl	20 mL/g	Demineralization	Dialysis	2	26	34	Tetranectin	Tetranectin OS=Gallus gallus GN=CLEC3B PE=2 SV=1	tr|Q9DDD4|Q9DDD4_CHICK	K.AMIDNISQEVALLK.E	Y	43.34	1543.83	14	1.1	772.922	2	30.6		F6:579	1	48	61
4	20-HCl-D	HCl	20 mL/g	Demineralization	Dialysis	1	11	20	Vitronectin	Vitronectin OS=Gallus gallus PE=2 SV=1	tr|O12945|O12945_CHICK	R.GVPNQLDAAMAGR.I	Y	25.56	1298.64	13	0.5	650.328	2	20.94		F5:317	1	338	350
4	20-HCl-D	HCl	20 mL/g	Demineralization	Dialysis	1	11	20	Vitronectin	Vitronectin OS=Gallus gallus PE=2 SV=1	tr|O12945|O12945_CHICK	R.DISEGFEGIPNDIDAAFALPAHSYHGNER.V	Y	48.13	3141.44	29	2.6	786.37	4	31.19		F5:564	2	240	268
4	20-HCl-D	HCl	20 mL/g	Demineralization	Dialysis	1	11	20	Vitronectin	Vitronectin OS=Gallus gallus PE=2 SV=1	tr|O12945|O12945_CHICK	K.LISDVWGIEGPIDAAFTR.I	Y	44.27	1959.01	18	0.6	654.011	3	34.62		F5:620	4	193	210
4	20-HCl-D	HCl	20 mL/g	Demineralization	Dialysis	1	11	20	Vitronectin	Vitronectin OS=Gallus gallus PE=2 SV=1	tr|O12945|O12945_CHICK	K.LISDVW(+31.99)GIEGPIDAAFTR.I	Y	38.44	1991	18	-0.4	996.507	2	34.88		F5:623	2	193	210	Dihydroxy	W6:Dihydroxy:56.99
4	20-HCl-D	HCl	20 mL/g	Demineralization	Dialysis	2	11	20	Vitronectin	Vitronectin OS=Gallus gallus PE=2 SV=1	tr|O12945|O12945_CHICK	K.LISDF(sub V)WGIEGPIDAAFTR.I	Y	29.91	2007.01	18	-8.5	1004.5	2	34.87		F6:654	1	193	210	Mutation
4	20-HCl-P	HCl	20 mL/g	Demineralization	Preciptiation	2	32	56	12K Serum	12K serum protein beta-2-m cross-reactive (Fragment) OS=Gallus gallus PE=1 SV=1	tr|Q7LZS1|Q7LZS1_CHICK	K.GC(+57.02)MLDGVLYPFGEIPR.T	Y	40.37	1822.87	16	1.6	912.446	2	33.21		F8:647	2	15	30	Carbamidomethylation	C2:Carbamidomethylation:1000.00
4	20-HCl-P	HCl	20 mL/g	Demineralization	Preciptiation	2	36	619	Alpha-2 Antiplasmin	Uncharacterized protein OS=Gallus gallus GN=SERPINF2 PE=3 SV=2	tr|F1NAR5|F1NAR5_CHICK	R.YPLSWFTLESQDIQVAK.F	Y	40.35	2024.03	17	1.3	1013.02	2	32.71		F8:632	1	272	288
4	20-HCl-P	HCl	20 mL/g	Demineralization	Preciptiation	2	36	619	Alpha-2 Antiplasmin	Uncharacterized protein OS=Gallus gallus GN=SERPINF2 PE=3 SV=2	tr|F1NAR5|F1NAR5_CHICK	K.ITLDYQLELNSVLSHMGLQELFISPNLQK.I	Y	13.66	3342.75	29	-0.1	1115.26	3	39.79		F8:756	1	338	366
4	20-HCl-P	HCl	20 mL/g	Demineralization	Preciptiation	1	2	7	Alpha-2-HS-glycoprotein	Uncharacterized protein OS=Gallus gallus GN=AHSG PE=4 SV=1	tr|E1BZE1|E1BZE1_CHICK	A.AEVAQHDKVPHPVGFVPPPPLC(+57.02)PGK.I	Y	32.39	2672.39	25	-0.1	891.804	3	19.91		F7:308	1	314	338	Carbamidomethylation	C22:Carbamidomethylation:1000.00
4	20-HCl-P	HCl	20 mL/g	Demineralization	Preciptiation	1	2	7	Alpha-2-HS-glycoprotein	Uncharacterized protein OS=Gallus gallus GN=AHSG PE=4 SV=1	tr|E1BZE1|E1BZE1_CHICK	K.ISHNNPVASESSSSEFPSLLSAK.S	Y	37.59	2387.16	23	0.9	796.728	3	23.55		F7:423	2	284	306
4	20-HCl-P	HCl	20 mL/g	Demineralization	Preciptiation	1	2	7	Alpha-2-HS-glycoprotein	Uncharacterized protein OS=Gallus gallus GN=AHSG PE=4 SV=1	tr|E1BZE1|E1BZE1_CHICK	K.MVTEPSQD(+15.99)LIAEC(+57.02)QLYGHQPGVTYPHPGQDTSAGLVPSAGQGFTNHNLK.I	Y	24.89	5262.48	49	1	878.088	6	24.3		F7:449	1	235	283	Oxidation or Hydroxylation; Carbamidomethylation	D8:Oxidation or Hydroxylation:0.00;C13:Carbamidomethylation:1000.00
4	20-HCl-P	HCl	20 mL/g	Demineralization	Preciptiation	1	2	7	Alpha-2-HS-glycoprotein	Uncharacterized protein OS=Gallus gallus GN=AHSG PE=4 SV=1	tr|E1BZE1|E1BZE1_CHICK	K.MVTEPSQDLIAEC(+57.02)QLYGHQPGVTYPHPGQDTSAGLVPSAGQGFTN(+.98)HNLK.I	Y	18.05	5247.47	49	2	1312.88	4	24.9		F7:469	1	235	283	Carbamidomethylation; Deamidation (NQ)	C13:Carbamidomethylation:1000.00;N45:Deamidation (NQ):24.41
4	20-HCl-P	HCl	20 mL/g	Demineralization	Preciptiation	1	2	7	Alpha-2-HS-glycoprotein	Uncharacterized protein OS=Gallus gallus GN=AHSG PE=4 SV=1	tr|E1BZE1|E1BZE1_CHICK	K.VN(-17.03)GQFSVLASK.C	Y	24.8	1131.59	11	0.9	566.804	2	26.38		F7:512	1	118	128	Ammonia-loss (N)	N2:Ammonia-loss (N):1000.00
4	20-HCl-P	HCl	20 mL/g	Demineralization	Preciptiation	1	2	7	Alpha-2-HS-glycoprotein	Uncharacterized protein OS=Gallus gallus GN=AHSG PE=4 SV=1	tr|E1BZE1|E1BZE1_CHICK	K.DNLAAC(+57.02)QLLPEDQSNFGFCTAK(+57.02).M	Y	26.21	2498.12	22	0.6	833.715	3	28.25		F7:558	1	213	234	Carbamidomethylation; Carbamidomethylation (DHKE X@N-term)	C6:Carbamidomethylation:1000.00;K22:Carbamidomethylation (DHKE X@N-term):30.96
4	20-HCl-P	HCl	20 mL/g	Demineralization	Preciptiation	1	2	7	Alpha-2-HS-glycoprotein	Uncharacterized protein OS=Gallus gallus GN=AHSG PE=4 SV=1	tr|E1BZE1|E1BZE1_CHICK	K.NPDVY(+15.99)LM(+15.99)LLEIGR.A	Y	37.5	1563.8	13	0.5	782.906	2	35.44		F7:709	3	172	184	Oxidation or Hydroxylation; Oxidation (M)	Y5:Oxidation or Hydroxylation:38.16;M7:Oxidation (M):1000.00
4	20-HCl-P	HCl	20 mL/g	Demineralization	Preciptiation	1	2	7	Alpha-2-HS-glycoprotein	Uncharacterized protein OS=Gallus gallus GN=AHSG PE=4 SV=1	tr|E1BZE1|E1BZE1_CHICK	K.NPDVY(+31.99)LM(+15.99)LLEIGR.A	Y	31.87	1579.79	13	1.4	790.904	2	35.6		F7:713	2	172	184	Dihydroxy; Oxidation (M)	Y5:Dihydroxy:22.45;M7:Oxidation (M):1000.00
4	20-HCl-P	HCl	20 mL/g	Demineralization	Preciptiation	2	2	7	Alpha-2-HS-glycoprotein	Uncharacterized protein OS=Gallus gallus GN=AHSG PE=4 SV=1	tr|E1BZE1|E1BZE1_CHICK	K.VNGQFSVLASK.C	Y	47.89	1148.62	11	0.5	575.317	2	19.64		F8:294	3	118	128
4	20-HCl-P	HCl	20 mL/g	Demineralization	Preciptiation	2	2	7	Alpha-2-HS-glycoprotein	Uncharacterized protein OS=Gallus gallus GN=AHSG PE=4 SV=1	tr|E1BZE1|E1BZE1_CHICK	R.AAAEVAQHDKVPHPVGFVPPPPLCPGK(+57.02).I	Y	23.69	2814.46	27	1.5	704.624	4	19.72		F8:297	4	312	338	Carbamidomethylation (DHKE X@N-term)	K27:Carbamidomethylation (DHKE X@N-term):60.45
4	20-HCl-P	HCl	20 mL/g	Demineralization	Preciptiation	2	2	7	Alpha-2-HS-glycoprotein	Uncharacterized protein OS=Gallus gallus GN=AHSG PE=4 SV=1	tr|E1BZE1|E1BZE1_CHICK	R.FALNRIEQVR.V	Y	12.78	1244.7	10	0.9	623.357	2	19.83		F8:301	1	55	64
4	20-HCl-P	HCl	20 mL/g	Demineralization	Preciptiation	2	2	7	Alpha-2-HS-glycoprotein	Uncharacterized protein OS=Gallus gallus GN=AHSG PE=4 SV=1	tr|E1BZE1|E1BZE1_CHICK	R.AAAEVAQHDKVPHPVGFVPPPPLC(+57.02)PGK.I	Y	51.31	2814.46	27	1.5	939.163	3	20.19		F8:313	12	312	338	Carbamidomethylation	C24:Carbamidomethylation:1000.00
4	20-HCl-P	HCl	20 mL/g	Demineralization	Preciptiation	2	2	7	Alpha-2-HS-glycoprotein	Uncharacterized protein OS=Gallus gallus GN=AHSG PE=4 SV=1	tr|E1BZE1|E1BZE1_CHICK	K.VN(+.98)GQFSVLASK.C	Y	44.73	1149.6	11	0.9	575.809	2	20.42		F8:321	4	118	128	Deamidation (NQ)	N2:Deamidation (NQ):40.21
4	20-HCl-P	HCl	20 mL/g	Demineralization	Preciptiation	2	2	7	Alpha-2-HS-glycoprotein	Uncharacterized protein OS=Gallus gallus GN=AHSG PE=4 SV=1	tr|E1BZE1|E1BZE1_CHICK	K.VPHPVGFVPPPPLC(+57.02)PGK.I	Y	24.85	1793.96	17	0.8	598.996	3	22.68		F8:388	1	322	338	Carbamidomethylation	C14:Carbamidomethylation:1000.00
4	20-HCl-P	HCl	20 mL/g	Demineralization	Preciptiation	2	2	7	Alpha-2-HS-glycoprotein	Uncharacterized protein OS=Gallus gallus GN=AHSG PE=4 SV=1	tr|E1BZE1|E1BZE1_CHICK	K.M(+15.99)VTEPSQDLIAEC(+57.02)QLYGHQPGVTYPHPGQDTSAGLVPSAGQGFTNHNLK.I	Y	21.31	5262.48	49	1	878.088	6	24.33	14200000	F8:442	2	235	283	Oxidation (M); Carbamidomethylation	M1:Oxidation (M):1000.00;C13:Carbamidomethylation:1000.00
4	20-HCl-P	HCl	20 mL/g	Demineralization	Preciptiation	2	2	7	Alpha-2-HS-glycoprotein	Uncharacterized protein OS=Gallus gallus GN=AHSG PE=4 SV=1	tr|E1BZE1|E1BZE1_CHICK	K.MVTEPSQDLIAEC(+57.02)QLYGHQPGVTYPHPGQDTSAGLVPSAGQGFTNHNLK.I	Y	38.65	5246.48	49	0.1	875.421	6	24.57		F8:450	3	235	283	Carbamidomethylation	C13:Carbamidomethylation:1000.00
4	20-HCl-P	HCl	20 mL/g	Demineralization	Preciptiation	2	2	7	Alpha-2-HS-glycoprotein	Uncharacterized protein OS=Gallus gallus GN=AHSG PE=4 SV=1	tr|E1BZE1|E1BZE1_CHICK	K.ISHNNPVAS(+79.97)ESSSSEFPSLLSAK.S	Y	42.15	2467.13	23	1	823.384	3	25.48		F8:476	1	284	306	Phosphorylation (STY)	S9:Phosphorylation (STY):0.00
4	20-HCl-P	HCl	20 mL/g	Demineralization	Preciptiation	2	2	7	Alpha-2-HS-glycoprotein	Uncharacterized protein OS=Gallus gallus GN=AHSG PE=4 SV=1	tr|E1BZE1|E1BZE1_CHICK	K.DNLAAC(+57.02)QLLPEDQSNFGFC(+57.02)TAK.M	Y	31.31	2498.12	22	0.5	833.715	3	27.82		F8:537	2	213	234	Carbamidomethylation	C6:Carbamidomethylation:1000.00;C19:Carbamidomethylation:1000.00
4	20-HCl-P	HCl	20 mL/g	Demineralization	Preciptiation	2	2	7	Alpha-2-HS-glycoprotein	Uncharacterized protein OS=Gallus gallus GN=AHSG PE=4 SV=1	tr|E1BZE1|E1BZE1_CHICK	A.APAAPPPPLGC(+57.02)DDPEIEAAAEFAVIYIN(+.98)GHSHHGYR.F	Y	65.31	3839.8	36	1.5	768.968	5	31.77		F8:610	6	19	54	Carbamidomethylation; Deamidation (NQ)	C11:Carbamidomethylation:1000.00;N28:Deamidation (NQ):1000.00
4	20-HCl-P	HCl	20 mL/g	Demineralization	Preciptiation	2	2	7	Alpha-2-HS-glycoprotein	Uncharacterized protein OS=Gallus gallus GN=AHSG PE=4 SV=1	tr|E1BZE1|E1BZE1_CHICK	K.NPDVYLM(+15.99)LLEIGR.A	Y	47.1	1547.8	13	0.6	774.909	2	32.6		F8:628	5	172	184	Oxidation (M)	M7:Oxidation (M):1000.00
4	20-HCl-P	HCl	20 mL/g	Demineralization	Preciptiation	2	2	7	Alpha-2-HS-glycoprotein	Uncharacterized protein OS=Gallus gallus GN=AHSG PE=4 SV=1	tr|E1BZE1|E1BZE1_CHICK	A.APAAPPPPLGC(+57.02)DDPEIEAAAEFAVIYINGHSHHGYR.F	Y	49.87	3838.82	36	0.6	768.771	5	33.15		F8:645	3	19	54	Carbamidomethylation	C11:Carbamidomethylation:1000.00
4	20-HCl-P	HCl	20 mL/g	Demineralization	Preciptiation	2	2	7	Alpha-2-HS-glycoprotein	Uncharacterized protein OS=Gallus gallus GN=AHSG PE=4 SV=1	tr|E1BZE1|E1BZE1_CHICK	P.AAPPPPLGC(+57.02)DDPEIEAAAEFAVIYINGHSHHGYR.F	Y	39.77	3670.73	34	2.2	735.154	5	33.3		F8:649	1	21	54	Carbamidomethylation	C9:Carbamidomethylation:1000.00
4	20-HCl-P	HCl	20 mL/g	Demineralization	Preciptiation	2	2	7	Alpha-2-HS-glycoprotein	Uncharacterized protein OS=Gallus gallus GN=AHSG PE=4 SV=1	tr|E1BZE1|E1BZE1_CHICK	A.PAAPPPPLGC(+57.02)DDPEIEAAAEFAVIYINGHSHHGYR.F	Y	28.16	3767.78	35	-0.5	754.563	5	33.37		F8:651	1	20	54	Carbamidomethylation	C10:Carbamidomethylation:1000.00
4	20-HCl-P	HCl	20 mL/g	Demineralization	Preciptiation	2	2	7	Alpha-2-HS-glycoprotein	Uncharacterized protein OS=Gallus gallus GN=AHSG PE=4 SV=1	tr|E1BZE1|E1BZE1_CHICK	A.PAAPPPPLGC(+57.02)DDPEIEAAAEFAVIYIN(+.98)GHSHHGYR.F	Y	38.26	3768.76	35	6	754.764	5	33.58		F8:658	1	20	54	Carbamidomethylation; Deamidation (NQ)	C10:Carbamidomethylation:1000.00;N27:Deamidation (NQ):1000.00
4	20-HCl-P	HCl	20 mL/g	Demineralization	Preciptiation	2	2	7	Alpha-2-HS-glycoprotein	Uncharacterized protein OS=Gallus gallus GN=AHSG PE=4 SV=1	tr|E1BZE1|E1BZE1_CHICK	K.NPDVYLMLLEIGR.A	Y	48.17	1531.81	13	0.6	766.911	2	35.34		F8:690	7	172	184
4	20-HCl-P	HCl	20 mL/g	Demineralization	Preciptiation	1	3	6	Apolipoprotein	Apolipoprotein A-I OS=Gallus gallus GN=APOA1 PE=1 SV=2	P08250|APOA1_CHICK	K.VM(+15.99)EQLSNLR.E	Y	34.37	1104.56	9	0.8	553.288	2	15.92		F7:176	1	219	227	Oxidation (M)	M2:Oxidation (M):1000.00
4	20-HCl-P	HCl	20 mL/g	Demineralization	Preciptiation	1	3	6	Apolipoprotein	Apolipoprotein A-I OS=Gallus gallus GN=APOA1 PE=1 SV=2	P08250|APOA1_CHICK	R.AELTKDLEEVKEK.I	Y	42.76	1530.81	13	0.9	766.415	2	15.95		F7:177	2	107	119
4	20-HCl-P	HCl	20 mL/g	Demineralization	Preciptiation	1	3	6	Apolipoprotein	Apolipoprotein A-I OS=Gallus gallus GN=APOA1 PE=1 SV=2	P08250|APOA1_CHICK	R.LTPYAENLK.N	Y	24.65	1047.56	9	0.3	524.788	2	17.12		F7:215	1	241	249
4	20-HCl-P	HCl	20 mL/g	Demineralization	Preciptiation	1	3	6	Apolipoprotein	Apolipoprotein A-I OS=Gallus gallus GN=APOA1 PE=1 SV=2	P08250|APOA1_CHICK	K.VMEQLSNLR.E	Y	31.74	1088.56	9	0.9	545.29	2	19.34		F7:289	1	219	227
4	20-HCl-P	HCl	20 mL/g	Demineralization	Preciptiation	1	3	6	Apolipoprotein	Apolipoprotein A-I OS=Gallus gallus GN=APOA1 PE=1 SV=2	P08250|APOA1_CHICK	K.NLAPYSDELR.Q	Y	33.46	1176.58	10	-0.4	589.296	2	19.47		F7:293	2	185	194
[truncated: 1,507 more rows]
