# Supplementary material for: Bone protein “extractomics”: comparing the efficiency of bone protein extractions of Gallus gallus in tandem mass spectrometry, with an eye towards paleoproteomics
Source: PeerJ. 2016 Oct 27;4:e2603. doi: 10.7717/peerj.2603 (PMC5088622; doi:10.7717/peerj.2603)
Supplement: Table S7 [file peerj-04-2603-s011.xlsx]

## Sheet: Peptides
Table S7. Peptides identified in samples from Method 1-3, precipitated HCl (5 mL/g) (5-HCL-P) @ 1% FDR
Sample #	Protein Group	Protein ID	Protein Description	Protein Accession	Peptide	Unique	-10lgP	Mass	Length	ppm	m/z	z	RT	Area	Scan	#Spec	Start	End	PTM	AScore
Sample 1	3	4	Collagen alpha-1(I) chain OS=Gallus gallus GN=COL1A1 PE=1 SV=3	P02457|CO1A1_CHICK	K.GDRGETGPAGP(+15.99)PGAPGAP(+15.99)GAP(+15.99)GPVGPAGK.N	Y	16.6	2496.2	29	1.1	833.075	3	13.69		F19:135	1	1023	1051	Oxidation or Hydroxylation	P11:Oxidation or Hydroxylation:0.00;P18:Oxidation or Hydroxylation:28.36;P21:Oxidation or Hydroxylation:11.10
Sample 1	2	3	Serum albumin OS=Gallus gallus GN=ALB PE=1 SV=2	P19121|ALBU_CHICK	K.LC(+57.02)SAPAEEREVGQMK.L	Y	22.32	1703.8	15	0.9	568.94	3	14.54		F19:156	2	541	555	Carbamidomethylation	C2:Carbamidomethylation:1000.00
Sample 1	1	1	Collagen alpha-2(I) chain OS=Gallus gallus GN=COL1A2 PE=4 SV=1	tr|F1P0H9|F1P0H9_CHICK	R.VGP(+15.99)P(+15.99)GPAGITGPP(+15.99)GPP(+15.99)GPAGK.D	Y	20.07	1840.93	21	1.4	921.475	2	15.74		F19:191	3	794	814	Oxidation or Hydroxylation	P3:Oxidation or Hydroxylation:24.24;P4:Oxidation or Hydroxylation:18.53;P13:Oxidation or Hydroxylation:26.02;P16:Oxidation or Hydroxylation:12.28
Sample 1	1	1	Collagen alpha-2(I) chain OS=Gallus gallus GN=COL1A2 PE=4 SV=1	tr|F1P0H9|F1P0H9_CHICK	R.GLP(+15.99)GAIGAP(+15.99)GPAGGAGDRGEGGPAGPAGPAGAR.G	Y	36.86	2724.33	33	1.1	909.119	3	16		F19:200	5	675	707	Oxidation or Hydroxylation	P3:Oxidation or Hydroxylation:131.34;P9:Oxidation or Hydroxylation:26.31
Sample 1	3	4	Collagen alpha-1(I) chain OS=Gallus gallus GN=COL1A1 PE=1 SV=3	P02457|CO1A1_CHICK	R.GFPGAD(+15.99)GIAGPKGPP(+15.99)GER.G	Y	31.71	1710.83	18	0.9	856.424	2	16.13		F19:205	1	483	500	Oxidation or Hydroxylation	D6:Oxidation or Hydroxylation:0.00;P15:Oxidation or Hydroxylation:0.00
Sample 1	3	4	Collagen alpha-1(I) chain OS=Gallus gallus GN=COL1A1 PE=1 SV=3	P02457|CO1A1_CHICK	R.GLTGPIGPPGPAGAPGDK(+42.01)GE(+21.98)AGPPGPAGPTGAR.G	Y	22.05	2894.43	33	-3.3	965.813	3	16.32		F19:211	1	753	785	Acetylation (K); Sodium adduct	K18:Acetylation (K):1000.00;E20:Sodium adduct:7.77
Sample 1	3	4	Collagen alpha-1(I) chain OS=Gallus gallus GN=COL1A1 PE=1 SV=3	P02457|CO1A1_CHICK	K.Q(+42.01)GPSGASGERGPPGPMGPP(+15.99)GLAGPP(+15.99)GEAGR.E	Y	20.73	2768.29	30	0.8	923.773	3	16.39		F19:213	1	974	1003	Acetylation (N-term); Oxidation or Hydroxylation	Q1:Acetylation (N-term):1000.00;P19:Oxidation or Hydroxylation:17.01;P25:Oxidation or Hydroxylation:0.00
Sample 1	1	1	Collagen alpha-2(I) chain OS=Gallus gallus GN=COL1A2 PE=4 SV=1	tr|F1P0H9|F1P0H9_CHICK	R.GLHGEFGVP(+15.99)GPAGPR.G	Y	44.83	1462.73	15	1	732.374	2	16.59		F19:218	4	573	587	Oxidation or Hydroxylation	P9:Oxidation or Hydroxylation:33.18
Sample 1	1	1	Collagen alpha-2(I) chain OS=Gallus gallus GN=COL1A2 PE=4 SV=1	tr|F1P0H9|F1P0H9_CHICK	K.EGPVGFP(+15.99)GADGR.V	Y	38.09	1173.54	12	0.4	587.778	2	16.67		F19:221	2	464	475	Oxidation or Hydroxylation	P7:Oxidation or Hydroxylation:11.06
Sample 1	3	4	Collagen alpha-1(I) chain OS=Gallus gallus GN=COL1A1 PE=1 SV=3	P02457|CO1A1_CHICK	K.GSP(+15.99)GADGPIGAP(+15.99)GTP(+15.99)GPQGIAGQR.G	Y	29.41	2162.04	24	1.5	1082.03	2	16.69		F19:222	2	924	947	Oxidation or Hydroxylation	P3:Oxidation or Hydroxylation:0.00;P12:Oxidation or Hydroxylation:67.69;P15:Oxidation or Hydroxylation:15.73
Sample 1	3	4	Collagen alpha-1(I) chain OS=Gallus gallus GN=COL1A1 PE=1 SV=3	P02457|CO1A1_CHICK	K.GATGAP(+15.99)GIAGAP(+15.99)GFPGAR(+15.99).G	Y	26.58	1571.77	18	1.5	786.893	2	16.95		F19:231	1	387	404	Oxidation or Hydroxylation	P6:Oxidation or Hydroxylation:63.64;P12:Oxidation or Hydroxylation:0.00;R18:Oxidation or Hydroxylation:5.77
Sample 1	3	4	Collagen alpha-1(I) chain OS=Gallus gallus GN=COL1A1 PE=1 SV=3	P02457|CO1A1_CHICK	K.GATGAP(+15.99)GIAGAP(+15.99)GFP(+15.99)GAR.G	Y	38.68	1571.77	18	1.4	786.893	2	17.1		F19:236	2	387	404	Oxidation or Hydroxylation	P6:Oxidation or Hydroxylation:98.53;P12:Oxidation or Hydroxylation:17.01;P15:Oxidation or Hydroxylation:6.63
Sample 1	3	4	Collagen alpha-1(I) chain OS=Gallus gallus GN=COL1A1 PE=1 SV=3	P02457|CO1A1_CHICK	R.GPP(+15.99)GPMGPP(+15.99)GLAGPP(+15.99)GEAGR.E	Y	44.36	1815.86	20	1.5	908.937	2	17.24		F19:241	3	984	1003	Oxidation or Hydroxylation	P3:Oxidation or Hydroxylation:11.06;P9:Oxidation or Hydroxylation:27.96;P15:Oxidation or Hydroxylation:11.06
Sample 1	3	4	Collagen alpha-1(I) chain OS=Gallus gallus GN=COL1A1 PE=1 SV=3	P02457|CO1A1_CHICK	R.GFP(+15.99)GADGIAGPK.G	Y	38.63	1101.55	12	0.8	551.78	2	17.29		F19:243	3	483	494	Oxidation or Hydroxylation	P3:Oxidation or Hydroxylation:9.34
Sample 1	3	4	Collagen alpha-1(I) chain OS=Gallus gallus GN=COL1A1 PE=1 SV=3	P02457|CO1A1_CHICK	R.GLTGPIGPPGP(+15.99)AGAP(+15.99)GDKGEAGPP(+15.99)GPAGPTGAR.G	Y	28.04	2878.42	33	1.6	960.482	3	17.43		F19:248	1	753	785	Oxidation or Hydroxylation	P11:Oxidation or Hydroxylation:0.00;P15:Oxidation or Hydroxylation:0.00;P24:Oxidation or Hydroxylation:11.06
Sample 1	3	4	Collagen alpha-1(I) chain OS=Gallus gallus GN=COL1A1 PE=1 SV=3	P02457|CO1A1_CHICK	R.GLTGPIGPP(+15.99)GPAGAPGDKGEAGPP(+15.99)GPAGPTGAR.G	Y	43.38	2862.43	33	1.2	955.15	3	17.57		F19:252	2	753	785	Oxidation or Hydroxylation	P9:Oxidation or Hydroxylation:42.89;P24:Oxidation or Hydroxylation:42.78
Sample 1	3	4	Collagen alpha-1(I) chain OS=Gallus gallus GN=COL1A1 PE=1 SV=3	P02457|CO1A1_CHICK	R.GFP(+15.99)GLP(+15.99)GPSGEP(+15.99)GK.Q	Y	24.46	1343.64	14	1.1	672.826	2	18.27		F19:276	1	960	973	Oxidation or Hydroxylation	P3:Oxidation or Hydroxylation:14.02;P6:Oxidation or Hydroxylation:45.01;P12:Oxidation or Hydroxylation:11.10
Sample 1	1	1	Collagen alpha-2(I) chain OS=Gallus gallus GN=COL1A2 PE=4 SV=1	tr|F1P0H9|F1P0H9_CHICK	R.VGPIGPAGNRGEPGN(+15.99)IGFP(+15.99)GPK.G	Y	31.99	2119.08	22	0.9	707.368	3	18.29		F19:277	3	476	497	Oxidation or Hydroxylation	N15:Oxidation or Hydroxylation:0.00;P19:Oxidation or Hydroxylation:0.00
Sample 1	1	1	Collagen alpha-2(I) chain OS=Gallus gallus GN=COL1A2 PE=4 SV=1	tr|F1P0H9|F1P0H9_CHICK	R.VGPIGPAGNRGEP(+15.99)GNIGFPGP(+15.99)K.G	Y	40.11	2119.08	22	0.5	1060.55	2	18.56		F19:286	3	476	497	Oxidation or Hydroxylation	P13:Oxidation or Hydroxylation:11.10;P21:Oxidation or Hydroxylation:0.00
Sample 1	3	4	Collagen alpha-1(I) chain OS=Gallus gallus GN=COL1A1 PE=1 SV=3	P02457|CO1A1_CHICK	R.GFSGLQGP(+31.99)PGPPGAP(+15.99)GEQGPSGASGPAGPR.G	Y	29.06	2688.25	30	1.1	897.092	3	19.04		F19:302	1	1101	1130	Dihydroxy; Oxidation or Hydroxylation	P8:Dihydroxy:0.00;P15:Oxidation or Hydroxylation:22.09
Sample 1	3	4	Collagen alpha-1(I) chain OS=Gallus gallus GN=COL1A1 PE=1 SV=3	P02457|CO1A1_CHICK	R.GFP(+15.99)GLPGPSGEP(+15.99)GK.Q	Y	16.16	1327.64	14	0.7	664.828	2	19.08		F19:303	1	960	973	Oxidation or Hydroxylation	P3:Oxidation or Hydroxylation:17.01;P12:Oxidation or Hydroxylation:4.73
Sample 1	6	8	SPARC OS=Gallus gallus GN=SPARC PE=4 SV=1	tr|F1P291|F1P291_CHICK	K.LHLDYIGPC(+57.02)K.F	Y	34.68	1214.61	10	0.4	608.313	2	19.1		F19:304	1	136	145	Carbamidomethylation	C9:Carbamidomethylation:1000.00
Sample 1	3	4	Collagen alpha-1(I) chain OS=Gallus gallus GN=COL1A1 PE=1 SV=3	P02457|CO1A1_CHICK	R.GFSGLQGP(+15.99)PGPP(+15.99)GAP(+15.99)GEQGPSGASGPAGPR.G	Y	30.53	2688.25	30	3.7	1345.14	2	19.16		F19:306	1	1101	1130	Oxidation or Hydroxylation	P8:Oxidation or Hydroxylation:0.00;P12:Oxidation or Hydroxylation:11.06;P15:Oxidation or Hydroxylation:56.99
Sample 1	5	6	Apolipoprotein A-I OS=Gallus gallus GN=APOA1 PE=1 SV=2	P08250|APOA1_CHICK	K.NLAPYSDELR.Q	Y	28.41	1176.58	10	0.5	589.296	2	19.32		F19:311	2	185	194
Sample 1	3	4	Collagen alpha-1(I) chain OS=Gallus gallus GN=COL1A1 PE=1 SV=3	P02457|CO1A1_CHICK	R.GFSGLQGPPGP(+15.99)PGAP(+15.99)GEQGPSGASGPAGPR.G	Y	27.72	2672.26	30	1.6	891.761	3	19.52		F19:318	1	1101	1130	Oxidation or Hydroxylation	P11:Oxidation or Hydroxylation:0.00;P15:Oxidation or Hydroxylation:28.36
Sample 1	3	4	Collagen alpha-1(I) chain OS=Gallus gallus GN=COL1A1 PE=1 SV=3	P02457|CO1A1_CHICK	R.GFSGLQGPP(+15.99)GPPGAP(+15.99)GEQGPSGASGPAGPR.G	Y	43.45	2672.26	30	0.8	1337.14	2	19.57		F19:320	1	1101	1130	Oxidation or Hydroxylation	P9:Oxidation or Hydroxylation:38.64;P15:Oxidation or Hydroxylation:76.17
Sample 1	4	7	Uncharacterized protein OS=Gallus gallus GN=AHSG PE=4 SV=1	tr|E1BZE1|E1BZE1_CHICK	R.AAAEVAQHDKVPHPVGFVPPPPLCPGK(+57.02).I	Y	35.69	2814.46	27	0.6	563.9	5	19.82		F19:328	6	312	338	Carbamidomethylation (DHKE X@N-term)	K27:Carbamidomethylation (DHKE X@N-term):112.92
Sample 1	3	4	Collagen alpha-1(I) chain OS=Gallus gallus GN=COL1A1 PE=1 SV=3	P02457|CO1A1_CHICK	K.DGLNGLP(+15.99)GPIGP(+15.99)PGPR(+15.99).G	Y	37.99	1560.79	16	0.8	781.403	2	20.02		F19:335	2	1142	1157	Oxidation or Hydroxylation	P7:Oxidation or Hydroxylation:43.88;P12:Oxidation or Hydroxylation:0.00;R16:Oxidation or Hydroxylation:0.00
Sample 1	3	4	Collagen alpha-1(I) chain OS=Gallus gallus GN=COL1A1 PE=1 SV=3	P02457|CO1A1_CHICK	K.DGLNGLP(+15.99)GPIGPP(+15.99)GPR(+15.99).G	Y	38.4	1560.79	16	0.6	781.403	2	20.29		F19:344	2	1142	1157	Oxidation or Hydroxylation	P7:Oxidation or Hydroxylation:17.01;P13:Oxidation or Hydroxylation:0.00;R16:Oxidation or Hydroxylation:0.00
Sample 1	1	1	Collagen alpha-2(I) chain OS=Gallus gallus GN=COL1A2 PE=4 SV=1	tr|F1P0H9|F1P0H9_CHICK	R.GSDGSAGPTGPAGPIGAAGPP(+15.99)GFP(+15.99)GAPGAK(+15.99).G	Y	31.15	2520.19	30	0.4	841.07	3	20.42		F19:349	1	234	263	Oxidation or Hydroxylation	P21:Oxidation or Hydroxylation:11.77;P24:Oxidation or Hydroxylation:19.86;K30:Oxidation or Hydroxylation:26.08
Sample 1	1	1	Collagen alpha-2(I) chain OS=Gallus gallus GN=COL1A2 PE=4 SV=1	tr|F1P0H9|F1P0H9_CHICK	R.GSDGSAGPTGPAGPIGAAGPP(+15.99)GFP(+15.99)GAP(+15.99)GAK.G	Y	49.73	2520.19	30	-1.6	1261.1	2	20.46		F19:350	2	234	263	Oxidation or Hydroxylation	P21:Oxidation or Hydroxylation:109.46;P24:Oxidation or Hydroxylation:141.74;P27:Oxidation or Hydroxylation:156.91
Sample 1	4	7	Uncharacterized protein OS=Gallus gallus GN=AHSG PE=4 SV=1	tr|E1BZE1|E1BZE1_CHICK	K.VNGQ(+.98)FSVLASK.C	Y	39.67	1149.6	11	1.4	575.809	2	20.49		F19:351	2	118	128	Deamidation (NQ)	Q4:Deamidation (NQ):13.45
Sample 1	5	6	Apolipoprotein A-I OS=Gallus gallus GN=APOA1 PE=1 SV=2	P08250|APOA1_CHICK	K.M(+15.99)TPLVQEFR.E	Y	36.8	1135.57	9	0.9	568.793	2	20.58		F19:354	2	230	238	Oxidation (M)	M1:Oxidation (M):1000.00
Sample 1	5	6	Apolipoprotein A-I OS=Gallus gallus GN=APOA1 PE=1 SV=2	P08250|APOA1_CHICK	K.LADNLDTLSAAAAK.L	Y	46.33	1372.72	14	0.7	687.368	2	21.12	70300000	F19:371	3	69	82
Sample 1	5	6	Apolipoprotein A-I OS=Gallus gallus GN=APOA1 PE=1 SV=2	P08250|APOA1_CHICK	K.ASGKDAIAQFESSAVGK.Q	Y	47.83	1664.84	17	1.3	833.427	2	21.14		F19:372	4	47	63
Sample 1	1	1	Collagen alpha-2(I) chain OS=Gallus gallus GN=COL1A2 PE=4 SV=1	tr|F1P0H9|F1P0H9_CHICK	R.GDN(sub P)GPVGPVGPAGAFGPR.G	Y	23.12	1620.8	18	5.6	811.412	2	21.7		F19:390	2	978	995	Mutation
Sample 1	12	28	Histone H2A-III OS=Gallus gallus PE=1 SV=2	P35062|H2A3_CHICK	R.AGLQFPVGR.V	Y	35.14	943.524	9	0.4	472.769	2	21.73		F19:391	3	22	30
Sample 1	12	29	Histone H2A-IV OS=Gallus gallus PE=1 SV=2	P02263|H2A4_CHICK	R.AGLQFPVGR.V	Y	35.14	943.524	9	0.4	472.769	2	21.73		F19:391	3	22	30
Sample 1	12	30	Histone H2A OS=Gallus gallus GN=H2A-VI PE=3 SV=2	tr|Q92069|Q92069_CHICK	R.AGLQFPVGR.V	Y	35.14	943.524	9	0.4	472.769	2	21.73		F19:391	3	22	30
Sample 1	12	31	Histone H2A.J OS=Gallus gallus GN=H2A-IX PE=3 SV=1	P70082|H2AJ_CHICK	R.AGLQFPVGR.V	Y	35.14	943.524	9	0.4	472.769	2	21.73		F19:391	3	22	30
Sample 1	10	76	Gallinacin-7 (Fragment) OS=Gallus gallus PE=4 SV=1	tr|E1AFV0|E1AFV0_CHICK	R.RPYYWIGTC(+57.02)NNGIGSC(+57.02)C(+57.02)AR.G	Y	23.03	2304	19	0.1	769.007	3	21.88		F19:396	1	39	57	Carbamidomethylation	C9:Carbamidomethylation:1000.00;C16:Carbamidomethylation:1000.00;C17:Carbamidomethylation:1000.00
Sample 1	10	77	Gallinacin-7 OS=Gallus gallus GN=GAL7 PE=2 SV=1	Q6QLR2|GLL7_CHICK	R.RPYYWIGTC(+57.02)NNGIGSC(+57.02)C(+57.02)AR.G	Y	23.03	2304	19	0.1	769.007	3	21.88		F19:396	1	45	63	Carbamidomethylation	C9:Carbamidomethylation:1000.00;C16:Carbamidomethylation:1000.00;C17:Carbamidomethylation:1000.00
Sample 1	5	6	Apolipoprotein A-I OS=Gallus gallus GN=APOA1 PE=1 SV=2	P08250|APOA1_CHICK	R.IRD(+15.99)MVDVYLETVK.A	Y	37.41	1595.82	13	0.7	532.949	3	22.03		F19:401	1	34	46	Oxidation or Hydroxylation	D3:Oxidation or Hydroxylation:0.00
Sample 1	1	1	Collagen alpha-2(I) chain OS=Gallus gallus GN=COL1A2 PE=4 SV=1	tr|F1P0H9|F1P0H9_CHICK	R.GLP(+15.99)GIAGATGEP(+15.99)GPLGVSGP(+15.99)PGAR.G	Y	47.71	2132.09	24	0.3	1067.05	2	22.37		F19:413	6	882	905	Oxidation or Hydroxylation	P3:Oxidation or Hydroxylation:195.68;P12:Oxidation or Hydroxylation:36.05;P20:Oxidation or Hydroxylation:0.00
Sample 1	1	1	Collagen alpha-2(I) chain OS=Gallus gallus GN=COL1A2 PE=4 SV=1	tr|F1P0H9|F1P0H9_CHICK	R.GDPGPVGPVGPAGAFGPR.G	Y	50.33	1603.81	18	1.1	802.913	2	22.47		F19:416	4	978	995
Sample 1	1	1	Collagen alpha-2(I) chain OS=Gallus gallus GN=COL1A2 PE=4 SV=1	tr|F1P0H9|F1P0H9_CHICK	R.GLP(+15.99)GIAGATGEP(+15.99)GPLGVSGPP(+15.99)GAR.G	Y	36.9	2132.09	24	0.6	711.703	3	22.52		F19:418	1	882	905	Oxidation or Hydroxylation	P3:Oxidation or Hydroxylation:90.32;P12:Oxidation or Hydroxylation:8.22;P21:Oxidation or Hydroxylation:0.00
Sample 1	21	15	Cystatin OS=Gallus gallus PE=1 SV=2	P01038|CYT_CHICK	R.LLGAPVPVDENDEGLQR.A	Y	43.7	1820.93	17	0.9	911.471	2	22.55		F19:419	2	30	46
Sample 1	21	16	Uncharacterized protein OS=Gallus gallus GN=CST3 PE=4 SV=1	tr|R4GLT1|R4GLT1_CHICK	R.LLGAPVPVDENDEGLQR.A	Y	43.7	1820.93	17	0.9	911.471	2	22.55		F19:419	2	42	58
Sample 1	1	1	Collagen alpha-2(I) chain OS=Gallus gallus GN=COL1A2 PE=4 SV=1	tr|F1P0H9|F1P0H9_CHICK	R.GLP(+15.99)GIAGATGEP(+15.99)GPLGVSGPPGAR(+15.99).G	Y	47.05	2132.09	24	1.3	1067.05	2	23.02		F19:434	3	882	905	Oxidation or Hydroxylation	P3:Oxidation or Hydroxylation:195.68;P12:Oxidation or Hydroxylation:36.05;R24:Oxidation or Hydroxylation:0.00
Sample 1	11	50	Lysozyme OS=Gallus gallus GN=LYZ PE=3 SV=1	tr|B8YK79|B8YK79_CHICK	R.NTDGSTDYGILQINSR.W	Y	41.38	1752.83	16	1	877.422	2	23.39		F19:445	2	64	79
Sample 1	11	51	Lysozyme C OS=Gallus gallus GN=LYZ PE=1 SV=1	P00698|LYSC_CHICK	R.NTDGSTDYGILQINSR.W	Y	41.38	1752.83	16	1	877.422	2	23.39		F19:445	2	64	79
Sample 1	5	6	Apolipoprotein A-I OS=Gallus gallus GN=APOA1 PE=1 SV=2	P08250|APOA1_CHICK	K.DAIAQFESSAVGK.Q	Y	40.75	1321.65	13	0.8	661.833	2	23.6		F19:452	1	51	63
Sample 1	1	1	Collagen alpha-2(I) chain OS=Gallus gallus GN=COL1A2 PE=4 SV=1	tr|F1P0H9|F1P0H9_CHICK	R.GLP(+15.99)GIAGATGEPGPLGVSGPP(+15.99)GAR.G	Y	44.09	2116.09	24	1	1059.05	2	23.63		F19:453	1	882	905	Oxidation or Hydroxylation	P3:Oxidation or Hydroxylation:140.79;P21:Oxidation or Hydroxylation:0.00
Sample 1	14	39	Histone H2B 8 OS=Gallus gallus GN=H2B-VIII PE=1 SV=3	Q9PSW9|H2B8_CHICK	R.LLLP(+31.99)GELAK.H	Y	16.86	984.586	9	0.4	493.3	2	23.93		F19:463	1	101	109	Dihydroxy	P4:Dihydroxy:10.19
Sample 1	14	40	Histone H2B 5 OS=Gallus gallus GN=H2B-V PE=1 SV=2	P0C1H4|H2B5_CHICK	R.LLLP(+31.99)GELAK.H	Y	16.86	984.586	9	0.4	493.3	2	23.93		F19:463	1	101	109	Dihydroxy	P4:Dihydroxy:10.19
Sample 1	14	41	Histone H2B 1/2/3/4/6 OS=Gallus gallus GN=H2B-I PE=1 SV=2	P0C1H3|H2B1_CHICK	R.LLLP(+31.99)GELAK.H	Y	16.86	984.586	9	0.4	493.3	2	23.93		F19:463	1	101	109	Dihydroxy	P4:Dihydroxy:10.19
Sample 1	14	42	Histone H2B (Fragment) OS=Gallus gallus GN=HIST1H2B5L PE=3 SV=1	tr|A0A0A0MQ64|A0A0A0MQ64_CHICK	R.LLLP(+31.99)GELAK.H	Y	16.86	984.586	9	0.4	493.3	2	23.93		F19:463	1	118	126	Dihydroxy	P4:Dihydroxy:10.19
Sample 1	8	54	Leukocyte ribonuclease A-2 OS=Gallus gallus PE=2 SV=1	tr|Q27J90|Q27J90_CHICK	R.NLNTLCINQPDQALR.T	Y	23.61	1711.87	15	1.1	856.942	2	23.99		F19:465	1	77	91
Sample 1	8	55	Ribonuclease homolog OS=Gallus gallus PE=2 SV=1	P30374|RSFR_CHICK	R.NLNTLCINQPDQALR.T	Y	23.61	1711.87	15	1.1	856.942	2	23.99		F19:465	1	77	91
Sample 1	10	76	Gallinacin-7 (Fragment) OS=Gallus gallus PE=4 SV=1	tr|E1AFV0|E1AFV0_CHICK	R.NGIC(+57.02)FPGIC(+57.02)R.R	Y	42.29	1192.55	10	0.7	597.282	2	24.19		F19:470	4	29	38	Carbamidomethylation	C4:Carbamidomethylation:1000.00;C9:Carbamidomethylation:1000.00
Sample 1	10	77	Gallinacin-7 OS=Gallus gallus GN=GAL7 PE=2 SV=1	Q6QLR2|GLL7_CHICK	R.NGIC(+57.02)FPGIC(+57.02)R.R	Y	42.29	1192.55	10	0.7	597.282	2	24.19		F19:470	4	35	44	Carbamidomethylation	C4:Carbamidomethylation:1000.00;C9:Carbamidomethylation:1000.00
Sample 1	2	3	Serum albumin OS=Gallus gallus GN=ALB PE=1 SV=2	P19121|ALBU_CHICK	K.QQYFC(+57.02)GILK.Q	Y	35.21	1155.57	9	1.1	578.795	2	24.22		F19:471	2	224	232	Carbamidomethylation	C5:Carbamidomethylation:1000.00
Sample 1	2	3	Serum albumin OS=Gallus gallus GN=ALB PE=1 SV=2	P19121|ALBU_CHICK	R.RHPEFSIQLIMR.I	Y	36.49	1525.82	12	0.5	509.614	3	24.86		F19:489	2	365	376
Sample 1	4	7	Uncharacterized protein OS=Gallus gallus GN=AHSG PE=4 SV=1	tr|E1BZE1|E1BZE1_CHICK	K.MVTEPSQDLIAEC(+57.02)QLYGHQPGVTYPHPGQDTSAGLVPSAGQGFTNHN(+.98)LK.I	Y	23.61	5247.47	49	1.9	875.587	6	24.89		F19:490	1	235	283	Carbamidomethylation; Deamidation (NQ)	C13:Carbamidomethylation:1000.00;N47:Deamidation (NQ):95.39
Sample 1	7	10	Decorin OS=Gallus gallus GN=DCN PE=1 SV=1	P28675|PGS2_CHICK	Y.WEIQPSAFR.C	Y	16.01	1132.57	9	0.5	567.291	2	24.99		F19:493	1	335	343
Sample 1	7	11	Decorin OS=Gallus gallus GN=DCN PE=4 SV=2	tr|E1BRE9|E1BRE9_CHICK	Y.WEIQPSAFR.C	Y	16.01	1132.57	9	0.5	567.291	2	24.99		F19:493	1	335	343
Sample 1	21	15	Cystatin OS=Gallus gallus PE=1 SV=2	P01038|CYT_CHICK	K.YILQVEIGR.T	Y	32.55	1089.62	9	1	545.817	2	25.04		F19:495	1	83	91
Sample 1	21	16	Uncharacterized protein OS=Gallus gallus GN=CST3 PE=4 SV=1	tr|R4GLT1|R4GLT1_CHICK	K.YILQVEIGR.T	Y	32.55	1089.62	9	1	545.817	2	25.04		F19:495	1	95	103
Sample 1	10	76	Gallinacin-7 (Fragment) OS=Gallus gallus PE=4 SV=1	tr|E1AFV0|E1AFV0_CHICK	G.Q(-17.03)PFIPRPIDTC(+57.02)R.L	Y	28.47	1481.74	12	1.2	741.881	2	25.13		F19:498	3	15	26	Pyro-glu from Q; Carbamidomethylation	Q1:Pyro-glu from Q:1000.00;C11:Carbamidomethylation:1000.00
Sample 1	10	77	Gallinacin-7 OS=Gallus gallus GN=GAL7 PE=2 SV=1	Q6QLR2|GLL7_CHICK	G.Q(-17.03)PFIPRPIDTC(+57.02)R.L	Y	28.47	1481.74	12	1.2	741.881	2	25.13		F19:498	3	21	32	Pyro-glu from Q; Carbamidomethylation	Q1:Pyro-glu from Q:1000.00;C11:Carbamidomethylation:1000.00
Sample 1	2	3	Serum albumin OS=Gallus gallus GN=ALB PE=1 SV=2	P19121|ALBU_CHICK	K.TIADGFTAM(+15.99)VDK.C	Y	40.51	1283.61	12	1.4	642.812	2	25.16		F19:499	2	574	585	Oxidation (M)	M9:Oxidation (M):1000.00
Sample 1	4	7	Uncharacterized protein OS=Gallus gallus GN=AHSG PE=4 SV=1	tr|E1BZE1|E1BZE1_CHICK	K.ISHNNPVASES(+79.97)SSSEFPSLLSAK.S	Y	44.21	2467.13	23	0.7	823.383	3	25.52		F19:511	1	284	306	Phosphorylation (STY)	S11:Phosphorylation (STY):0.00
Sample 1	11	50	Lysozyme OS=Gallus gallus GN=LYZ PE=3 SV=1	tr|B8YK79|B8YK79_CHICK	R.GYSLGNWVC(+57.02)AAK.F	Y	40.17	1324.62	12	0.7	663.319	2	25.76		F19:517	2	40	51	Carbamidomethylation	C9:Carbamidomethylation:1000.00
Sample 1	11	51	Lysozyme C OS=Gallus gallus GN=LYZ PE=1 SV=1	P00698|LYSC_CHICK	R.GYSLGNWVC(+57.02)AAK.F	Y	40.17	1324.62	12	0.7	663.319	2	25.76		F19:517	2	40	51	Carbamidomethylation	C9:Carbamidomethylation:1000.00
Sample 1	19	35	Lumican OS=Gallus gallus GN=LUM PE=1 SV=1	P51890|LUM_CHICK	R.ADLPQEMYNC(+57.02)LR.V	Y	32.48	1508.68	12	0.4	755.345	2	25.89		F19:521	1	324	335	Carbamidomethylation	C10:Carbamidomethylation:1000.00
Sample 1	8	54	Leukocyte ribonuclease A-2 OS=Gallus gallus PE=2 SV=1	tr|Q27J90|Q27J90_CHICK	G.VPTYQDFLYK.H	Y	35.32	1272.64	10	0.8	637.327	2	26.02		F19:524	3	24	33
Sample 1	8	55	Ribonuclease homolog OS=Gallus gallus PE=2 SV=1	P30374|RSFR_CHICK	G.VPTYQDFLYK.H	Y	35.32	1272.64	10	0.8	637.327	2	26.02		F19:524	3	24	33
Sample 1	7	10	Decorin OS=Gallus gallus GN=DCN PE=1 SV=1	P28675|PGS2_CHICK	K.DLPPDTTLLDLQNNK.I	Y	36.73	1695.87	15	0.3	848.942	2	26.11		F19:527	2	76	90
Sample 1	7	11	Decorin OS=Gallus gallus GN=DCN PE=4 SV=2	tr|E1BRE9|E1BRE9_CHICK	K.DLPPDTTLLDLQNNK.I	Y	36.73	1695.87	15	0.3	848.942	2	26.11		F19:527	2	76	90
Sample 1	8	54	Leukocyte ribonuclease A-2 OS=Gallus gallus PE=2 SV=1	tr|Q27J90|Q27J90_CHICK	G.VPTYQDF(+15.99)LYK.H	Y	21.52	1288.63	10	1.2	645.325	2	26.14		F19:528	1	24	33	Oxidation or Hydroxylation	F7:Oxidation or Hydroxylation:17.01
Sample 1	8	55	Ribonuclease homolog OS=Gallus gallus PE=2 SV=1	P30374|RSFR_CHICK	G.VPTYQDF(+15.99)LYK.H	Y	21.52	1288.63	10	1.2	645.325	2	26.14		F19:528	1	24	33	Oxidation or Hydroxylation	F7:Oxidation or Hydroxylation:17.01
Sample 1	3	4	Collagen alpha-1(I) chain OS=Gallus gallus GN=COL1A1 PE=1 SV=3	P02457|CO1A1_CHICK	K.SGEYWIDPNQGC(+57.02)NLDAIK.V	Y	28.15	2078.94	18	1.6	1040.48	2	26.22		F19:530	1	1260	1277	Carbamidomethylation	C12:Carbamidomethylation:1000.00
Sample 1	7	10	Decorin OS=Gallus gallus GN=DCN PE=1 SV=1	P28675|PGS2_CHICK	K.IDAEGLSGLTNLAK.L	Y	41.38	1400.75	14	1.1	701.384	2	26.4		F19:535	1	234	247
Sample 1	7	11	Decorin OS=Gallus gallus GN=DCN PE=4 SV=2	tr|E1BRE9|E1BRE9_CHICK	K.IDAEGLSGLTNLAK.L	Y	41.38	1400.75	14	1.1	701.384	2	26.4		F19:535	1	234	247
Sample 1	20	19	Uncharacterized protein OS=Gallus gallus GN=SERPINF1 PE=3 SV=1	tr|E1C7H6|E1C7H6_CHICK	G.Q(-17.03)NSPTTDGTVGEVEEEDPFYKTPINK.L	Y	21	2877.32	26	1.3	960.115	3	26.46		F19:537	1	26	51	Pyro-glu from Q	Q1:Pyro-glu from Q:1000.00
Sample 1	15	2181	Uncharacterized protein OS=Gallus gallus GN=LECT2 PE=4 SV=2	tr|F1NEF7|F1NEF7_CHICK	K.HKGVDVIC(+57.02)TDGSIVYAPFSGQLSGPIR.F	Y	35.55	2872.45	27	0.9	958.493	3	26.71		F19:544	1	67	93	Carbamidomethylation	C8:Carbamidomethylation:1000.00
Sample 1	15	2182	Myeloid protein 1 OS=Gallus gallus GN=MIM1 PE=1 SV=2	P08940|MIM1_CHICK	K.HKGVDVIC(+57.02)TDGSIVYAPFSGQLSGPIR.F	Y	35.55	2872.45	27	0.9	958.493	3	26.71		F19:544	1	67	93	Carbamidomethylation	C8:Carbamidomethylation:1000.00
Sample 1	2	3	Serum albumin OS=Gallus gallus GN=ALB PE=1 SV=2	P19121|ALBU_CHICK	R.SQC(+57.02)IMEAEFDEKPADLPSLVEK.Y	Y	44.41	2535.19	22	0.9	846.071	3	26.77		F19:546	1	315	336	Carbamidomethylation	C3:Carbamidomethylation:1000.00
Sample 1	20	19	Uncharacterized protein OS=Gallus gallus GN=SERPINF1 PE=3 SV=1	tr|E1C7H6|E1C7H6_CHICK	R.LQSLFTSPDFTK.I	Y	29.7	1382.71	12	0.3	692.362	2	26.84		F19:548	1	337	348
Sample 1	1	1	Collagen alpha-2(I) chain OS=Gallus gallus GN=COL1A2 PE=4 SV=1	tr|F1P0H9|F1P0H9_CHICK	K.AADFGPGPMGLMGPR.G	Y	51.23	1472.69	15	1.2	737.353	2	26.94		F19:551	3	84	98
Sample 1	1	1	Collagen alpha-2(I) chain OS=Gallus gallus GN=COL1A2 PE=4 SV=1	tr|F1P0H9|F1P0H9_CHICK	A.ADFGPGPMGLMGPR.G	Y	25.49	1401.65	14	0.6	701.834	2	27.15		F19:558	1	85	98
Sample 1	6	8	SPARC OS=Gallus gallus GN=SPARC PE=4 SV=1	tr|F1P291|F1P291_CHICK	K.NVLITLYERDEDNNLLTEK.Q	Y	34.22	2291.16	19	0.8	764.729	3	27.31		F19:562	2	168	186
Sample 1	2	3	Serum albumin OS=Gallus gallus GN=ALB PE=1 SV=2	P19121|ALBU_CHICK	K.LLINLIK.R	Y	21.17	825.569	7	1	826.577	1	27.72		F19:569	6	556	562
Sample 1	12	28	Histone H2A-III OS=Gallus gallus PE=1 SV=2	P35062|H2A3_CHICK	K.VTIAQGGVLPNIQA.V	Y	23.99	1379.78	14	0.9	690.896	2	27.78		F19:571	2	101	114
Sample 1	12	29	Histone H2A-IV OS=Gallus gallus PE=1 SV=2	P02263|H2A4_CHICK	K.VTIAQGGVLPNIQA.V	Y	23.99	1379.78	14	0.9	690.896	2	27.78		F19:571	2	101	114
Sample 1	12	30	Histone H2A OS=Gallus gallus GN=H2A-VI PE=3 SV=2	tr|Q92069|Q92069_CHICK	K.VTIAQGGVLPNIQA.V	Y	23.99	1379.78	14	0.9	690.896	2	27.78		F19:571	2	101	114
Sample 1	12	31	Histone H2A.J OS=Gallus gallus GN=H2A-IX PE=3 SV=1	P70082|H2AJ_CHICK	K.VTIAQGGVLPNIQA.V	Y	23.99	1379.78	14	0.9	690.896	2	27.78		F19:571	2	101	114
Sample 1	4	7	Uncharacterized protein OS=Gallus gallus GN=AHSG PE=4 SV=1	tr|E1BZE1|E1BZE1_CHICK	K.DNLAAC(+57.02)QLLPEDQSNFGFCTAK(+57.02).M	Y	38.05	2498.12	22	1.2	833.715	3	28.01		F19:578	2	213	234	Carbamidomethylation; Carbamidomethylation (DHKE X@N-term)	C6:Carbamidomethylation:1000.00;K22:Carbamidomethylation (DHKE X@N-term):29.98
Sample 1	4	7	Uncharacterized protein OS=Gallus gallus GN=AHSG PE=4 SV=1	tr|E1BZE1|E1BZE1_CHICK	K.DNLAAC(+57.02)QLLPEDQSNFGFC(+57.02)TAK.M	Y	23.42	2498.12	22	1.3	1250.07	2	28.03		F19:579	1	213	234	Carbamidomethylation	C6:Carbamidomethylation:1000.00;C19:Carbamidomethylation:1000.00
Sample 1	1	1	Collagen alpha-2(I) chain OS=Gallus gallus GN=COL1A2 PE=4 SV=1	tr|F1P0H9|F1P0H9_CHICK	K.TLNNQIETLLTPEGSK.K	Y	33.24	1756.92	16	1.8	879.469	2	28.11		F19:581	1	1136	1151
Sample 1	30	2184	Pleiotrophin OS=Gallus gallus GN=PTN PE=1 SV=1	P32760|PTN_CHICK	K.YQFQAWGEC(+57.02)DLNTALK.T	Y	40.71	1942.89	16	0.9	972.452	2	28.15		F19:582	1	69	84	Carbamidomethylation	C9:Carbamidomethylation:1000.00
Sample 1	30	2185	Pleiotrophin OS=Gallus gallus GN=PTN PE=4 SV=1	tr|R4GMK4|R4GMK4_CHICK	K.YQFQAWGEC(+57.02)DLNTALK.T	Y	40.71	1942.89	16	0.9	972.452	2	28.15		F19:582	1	99	114	Carbamidomethylation	C9:Carbamidomethylation:1000.00
Sample 1	1	1	Collagen alpha-2(I) chain OS=Gallus gallus GN=COL1A2 PE=4 SV=1	tr|F1P0H9|F1P0H9_CHICK	R.FTFSVLVDGC(+57.02)SK.K	Y	30.46	1358.65	12	0.9	680.335	2	28.62		F19:593	1	1305	1316	Carbamidomethylation	C10:Carbamidomethylation:1000.00
Sample 1	11	50	Lysozyme OS=Gallus gallus GN=LYZ PE=3 SV=1	tr|B8YK79|B8YK79_CHICK	R.NLC(+57.02)NIPC(+57.02)SALLSSDITASVNC(+57.02)AK.K	Y	40.86	2507.18	23	1.2	1254.6	2	28.9		F19:598	4	92	114	Carbamidomethylation	C3:Carbamidomethylation:1000.00;C7:Carbamidomethylation:1000.00;C21:Carbamidomethylation:1000.00
Sample 1	11	51	Lysozyme C OS=Gallus gallus GN=LYZ PE=1 SV=1	P00698|LYSC_CHICK	R.NLC(+57.02)NIPC(+57.02)SALLSSDITASVNC(+57.02)AK.K	Y	40.86	2507.18	23	1.2	1254.6	2	28.9		F19:598	4	92	114	Carbamidomethylation	C3:Carbamidomethylation:1000.00;C7:Carbamidomethylation:1000.00;C21:Carbamidomethylation:1000.00
Sample 1	15	2181	Uncharacterized protein OS=Gallus gallus GN=LECT2 PE=4 SV=2	tr|F1NEF7|F1NEF7_CHICK	K.VFPGIVSHIHVENC(+57.02)DQSDPTHLLRPIPDISPPFPQ.Q	Y	16.29	3957.98	35	1.4	792.605	5	29.04		F19:601	1	143	177	Carbamidomethylation	C14:Carbamidomethylation:1000.00
Sample 1	15	2182	Myeloid protein 1 OS=Gallus gallus GN=MIM1 PE=1 SV=2	P08940|MIM1_CHICK	K.VFPGIVSHIHVENC(+57.02)DQSDPTHLLRPIPDISPPFPQ.Q	Y	16.29	3957.98	35	1.4	792.605	5	29.04		F19:601	1	143	177	Carbamidomethylation	C14:Carbamidomethylation:1000.00
Sample 1	1	1	Collagen alpha-2(I) chain OS=Gallus gallus GN=COL1A2 PE=4 SV=1	tr|F1P0H9|F1P0H9_CHICK	A.Q(-17.03)YDPSK(+15.99)AADFGPGPMGLMGPR.G	Y	32.64	2189.99	21	0.5	1096	2	29.07		F19:602	2	78	98	Pyro-glu from Q; Oxidation or Hydroxylation	Q1:Pyro-glu from Q:1000.00;K6:Oxidation or Hydroxylation:22.85
Sample 1	1	1	Collagen alpha-2(I) chain OS=Gallus gallus GN=COL1A2 PE=4 SV=1	tr|F1P0H9|F1P0H9_CHICK	R.DGEDGP(+15.99)P(+15.99)GPPGP(+15.99)PGPPGLGGNFAAQYDPSKAADFGPGPMGLMGPR.G	Y	19.25	4346.96	45	9.1	1087.76	4	29.33		F19:609	1	54	98	Oxidation or Hydroxylation	P6:Oxidation or Hydroxylation:0.00;P7:Oxidation or Hydroxylation:0.00;P12:Oxidation or Hydroxylation:0.00
Sample 1	2	3	Serum albumin OS=Gallus gallus GN=ALB PE=1 SV=2	P19121|ALBU_CHICK	K.YVPPPFNPDMF(+15.99)SFDEK.L	Y	24.51	1944.86	16	1.7	973.439	2	29.56		F19:614	3	525	540	Oxidation or Hydroxylation	F11:Oxidation or Hydroxylation:22.85
Sample 1	16	12	Uncharacterized protein OS=Gallus gallus GN=LCN8 PE=3 SV=2	tr|E1C0K1|E1C0K1_CHICK	K.TSDDGEVYYSEEAEKTVEVLDTDYK.S	Y	38.98	2884.27	25	0.5	962.43	3	29.59		F19:615	1	90	114
Sample 1	31	2186	Basement membrane-specific heparan sulfate proteoglycan core protein OS=Gallus gallus GN=HSPG PE=2 SV=1	tr|Q6KDZ1|Q6KDZ1_CHICK	R.GAPDLQDTIELELR.T	Y	40.53	1568.8	14	0.9	785.41	2	29.63		F19:616	1	3908	3921
Sample 1	15	2181	Uncharacterized protein OS=Gallus gallus GN=LECT2 PE=4 SV=2	tr|F1NEF7|F1NEF7_CHICK	K.GVDVIC(+57.02)ADGATVYAPFSGELSGPVK.F	Y	37.72	2508.22	25	1.4	837.082	3	29.67		F19:617	2	219	243	Carbamidomethylation	C6:Carbamidomethylation:1000.00
Sample 1	15	2182	Myeloid protein 1 OS=Gallus gallus GN=MIM1 PE=1 SV=2	P08940|MIM1_CHICK	K.GVDVIC(+57.02)ADGATVYAPFSGELSGPVK.F	Y	37.72	2508.22	25	1.4	837.082	3	29.67		F19:617	2	219	243	Carbamidomethylation	C6:Carbamidomethylation:1000.00
Sample 1	1	1	Collagen alpha-2(I) chain OS=Gallus gallus GN=COL1A2 PE=4 SV=1	tr|F1P0H9|F1P0H9_CHICK	R.LSHPEWSSGFYWIDPNQGC(+57.02)TADAIR.A	Y	31.72	2906.31	25	0.4	969.777	3	29.77		F19:619	1	1163	1187	Carbamidomethylation	C19:Carbamidomethylation:1000.00
Sample 1	14	39	Histone H2B 8 OS=Gallus gallus GN=H2B-VIII PE=1 SV=3	Q9PSW9|H2B8_CHICK	K.AM(+15.99)GIM(+15.99)NSFVNDIFER.I	Y	38.8	1774.8	15	0.5	888.409	2	30.01		F19:624	1	59	73	Oxidation (M)	M2:Oxidation (M):1000.00;M5:Oxidation (M):1000.00
Sample 1	14	40	Histone H2B 5 OS=Gallus gallus GN=H2B-V PE=1 SV=2	P0C1H4|H2B5_CHICK	K.AM(+15.99)GIM(+15.99)NSFVNDIFER.I	Y	38.8	1774.8	15	0.5	888.409	2	30.01		F19:624	1	59	73	Oxidation (M)	M2:Oxidation (M):1000.00;M5:Oxidation (M):1000.00
Sample 1	14	41	Histone H2B 1/2/3/4/6 OS=Gallus gallus GN=H2B-I PE=1 SV=2	P0C1H3|H2B1_CHICK	K.AM(+15.99)GIM(+15.99)NSFVNDIFER.I	Y	38.8	1774.8	15	0.5	888.409	2	30.01		F19:624	1	59	73	Oxidation (M)	M2:Oxidation (M):1000.00;M5:Oxidation (M):1000.00
Sample 1	14	42	Histone H2B (Fragment) OS=Gallus gallus GN=HIST1H2B5L PE=3 SV=1	tr|A0A0A0MQ64|A0A0A0MQ64_CHICK	K.AM(+15.99)GIM(+15.99)NSFVNDIFER.I	Y	38.8	1774.8	15	0.5	888.409	2	30.01		F19:624	1	76	90	Oxidation (M)	M2:Oxidation (M):1000.00;M5:Oxidation (M):1000.00
Sample 1	27	275	Uncharacterized protein OS=Gallus gallus GN=COL5A2 PE=4 SV=2	tr|F1P563|F1P563_CHICK	R.GSQFVYGDTAVTQMTFLR.L	Y	40.88	2019.97	18	1.1	1010.99	2	30.19		F19:629	1	364	381
Sample 1	5	6	Apolipoprotein A-I OS=Gallus gallus GN=APOA1 PE=1 SV=2	P08250|APOA1_CHICK	R.LISFLDELQK.S	Y	40.94	1204.67	10	0.7	603.343	2	30.37		F19:632	4	252	261
Sample 1	5	6	Apolipoprotein A-I OS=Gallus gallus GN=APOA1 PE=1 SV=2	P08250|APOA1_CHICK	R.LISF(+31.99)LDELQK.S	Y	19.45	1236.66	10	1.6	619.338	2	30.42		F19:634	1	252	261	Dihydroxy	F4:Dihydroxy:36.87
Sample 1	5	6	Apolipoprotein A-I OS=Gallus gallus GN=APOA1 PE=1 SV=2	P08250|APOA1_CHICK	R.LISF(+15.99)LDELQK.S	Y	30.77	1220.67	10	2	611.341	2	30.45		F19:635	2	252	261	Oxidation or Hydroxylation	F4:Oxidation or Hydroxylation:45.01
Sample 1	23	44	Serpin H1 OS=Gallus gallus GN=SERPINH1 PE=1 SV=2	P13731|SERPH_CHICK	R.LYGPASINFADDFVK.N	Y	49.33	1655.82	15	0.8	828.918	2	30.55		F19:638	2	121	135
Sample 1	5	6	Apolipoprotein A-I OS=Gallus gallus GN=APOA1 PE=1 SV=2	P08250|APOA1_CHICK	R.EM(+15.99)WLKDTEALRAELTKDLEEVKEK.I	Y	34.35	2919.49	24	1	584.906	5	30.7		F19:643	2	96	119	Oxidation (M)	M2:Oxidation (M):1000.00
Sample 1	7	10	Decorin OS=Gallus gallus GN=DCN PE=1 SV=1	P28675|PGS2_CHICK	R.KAVFN(+.98)GLNQVIVL.E	Y	20.78	1414.82	13	1.4	708.417	2	30.8		F19:646	2	165	177	Deamidation (NQ)	N5:Deamidation (NQ):4.52
Sample 1	7	11	Decorin OS=Gallus gallus GN=DCN PE=4 SV=2	tr|E1BRE9|E1BRE9_CHICK	R.KAVFN(+.98)GLNQVIVL.E	Y	20.78	1414.82	13	1.4	708.417	2	30.8		F19:646	2	165	177	Deamidation (NQ)	N5:Deamidation (NQ):4.52
Sample 1	2	3	Serum albumin OS=Gallus gallus GN=ALB PE=1 SV=2	P19121|ALBU_CHICK	K.SFEAGHDAFMAEFVYEYSR.R	Y	54.44	2254.96	19	0.8	1128.49	2	30.83		F19:647	5	346	364
Sample 1	17	34	Tetranectin OS=Gallus gallus GN=CLEC3B PE=2 SV=1	tr|Q9DDD4|Q9DDD4_CHICK	K.AMIDNISQEVALLK.E	Y	15.63	1543.83	14	0.7	772.922	2	30.89		F19:648	1	48	61
Sample 1	15	2181	Uncharacterized protein OS=Gallus gallus GN=LECT2 PE=4 SV=2	tr|F1NEF7|F1NEF7_CHICK	K.GVDVIC(+57.02)TDGSIVYAPFSGQLSGPIR.F	Y	39.6	2607.3	25	1.2	870.108	3	30.97		F19:650	2	69	93	Carbamidomethylation	C6:Carbamidomethylation:1000.00
Sample 1	15	2182	Myeloid protein 1 OS=Gallus gallus GN=MIM1 PE=1 SV=2	P08940|MIM1_CHICK	K.GVDVIC(+57.02)TDGSIVYAPFSGQLSGPIR.F	Y	39.6	2607.3	25	1.2	870.108	3	30.97		F19:650	2	69	93	Carbamidomethylation	C6:Carbamidomethylation:1000.00
Sample 1	13	620	Uncharacterized protein OS=Gallus gallus GN=LYG2 PE=4 SV=1	tr|F1P5H6|F1P5H6_CHICK	K.RVGEALC(+57.02)IEPAVIAGIISR.E	Y	37.55	2023.12	19	1.2	675.383	3	31.47		F19:661	1	80	98	Carbamidomethylation	C7:Carbamidomethylation:1000.00
Sample 1	13	621	Lysozyme g OS=Gallus gallus PE=2 SV=1	P27042|LYG_CHICK	K.RVGEALC(+57.02)IEPAVIAGIISR.E	Y	37.55	2023.12	19	1.2	675.383	3	31.47		F19:661	1	80	98	Carbamidomethylation	C7:Carbamidomethylation:1000.00
Sample 1	6	8	SPARC OS=Gallus gallus GN=SPARC PE=4 SV=1	tr|F1P291|F1P291_CHICK	K.NYNM(+15.99)YIFPVHWQFGQLDQHPIDGYLSHTELAPLR.A	Y	45.49	4114.98	34	-0.2	824.003	5	31.5		F19:662	2	218	251	Oxidation (M)	M4:Oxidation (M):1000.00
Sample 1	18	618	Uncharacterized protein OS=Gallus gallus GN=COL11A1 PE=4 SV=2	tr|F1P4K9|F1P4K9_CHICK	K.KGIQSFLLSVYNEQGIQQVGVEVGR.S	Y	29.38	2747.46	25	4.1	916.831	3	31.62		F19:665	1	112	136
Sample 1	2	3	Serum albumin OS=Gallus gallus GN=ALB PE=1 SV=2	P19121|ALBU_CHICK	K.YVPPPFNPDMFSFDEK.L	Y	43.91	1928.87	16	0.3	643.963	3	32.19		F19:678	5	525	540
Sample 1	2	3	Serum albumin OS=Gallus gallus GN=ALB PE=1 SV=2	P19121|ALBU_CHICK	K.YVPPPFN(+15.99)PDMFSFDEK.L	Y	18.44	1944.86	16	1.1	973.438	2	32.22		F19:679	1	525	540	Oxidation or Hydroxylation	N7:Oxidation or Hydroxylation:0.00
Sample 1	6	8	SPARC OS=Gallus gallus GN=SPARC PE=4 SV=1	tr|F1P291|F1P291_CHICK	K.NYNMYIFPVHWQFGQLDQHPIDGYLSHTELAPLRAPLIPMEHC(+57.02)TTR.F	Y	28.28	5505.66	46	0.7	918.619	6	32.3		F19:681	1	218	263	Carbamidomethylation	C43:Carbamidomethylation:1000.00
Sample 1	20	19	Uncharacterized protein OS=Gallus gallus GN=SERPINF1 PE=3 SV=1	tr|E1C7H6|E1C7H6_CHICK	R.LTFPIEYHVDRPFLL.V	Y	30.63	1859	15	0.2	620.673	3	32.59		F19:686	1	385	399
Sample 1	22	2183	Heterochromatin-associated protein MENT OS=Gallus gallus GN=SERPINB10 PE=1 SV=1	O73790|SPB10_CHICK	R.ELSM(+15.99)FILLPDDIKDGTTGLEQLER.E	Y	29.37	2748.39	24	1	917.138	3	32.7		F19:689	1	253	276	Oxidation (M)	M4:Oxidation (M):1000.00
Sample 1	4	7	Uncharacterized protein OS=Gallus gallus GN=AHSG PE=4 SV=1	tr|E1BZE1|E1BZE1_CHICK	K.NPDVYLM(+15.99)LLEIGR.A	Y	46.21	1547.8	13	1.6	774.909	2	32.8		F19:691	2	172	184	Oxidation (M)	M7:Oxidation (M):1000.00
Sample 1	18	618	Uncharacterized protein OS=Gallus gallus GN=COL11A1 PE=4 SV=2	tr|F1P4K9|F1P4K9_CHICK	K.QLYPDGDFPEDFSILMTVKPK.K	Y	34.92	2439.2	21	1.8	814.076	3	32.83		F19:692	1	91	111
Sample 1	6	8	SPARC OS=Gallus gallus GN=SPARC PE=4 SV=1	tr|F1P291|F1P291_CHICK	K.F(+15.99)IP(+15.99)AC(+57.02)LDTELTEFPLR.M	Y	31.06	1952.96	16	0.6	977.486	2	33.1		F19:699	1	146	161	Oxidation or Hydroxylation; Carbamidomethylation	F1:Oxidation or Hydroxylation:15.57;P3:Oxidation or Hydroxylation:16.51;C5:Carbamidomethylation:1000.00
Sample 1	6	8	SPARC OS=Gallus gallus GN=SPARC PE=4 SV=1	tr|F1P291|F1P291_CHICK	K.FIP(+15.99)AC(+57.02)LDTELTEFPLR.M	Y	19.33	1936.96	16	0.5	969.488	2	33.19		F19:701	1	146	161	Oxidation or Hydroxylation; Carbamidomethylation	P3:Oxidation or Hydroxylation:0.00;C5:Carbamidomethylation:1000.00
Sample 1	4	7	Uncharacterized protein OS=Gallus gallus GN=AHSG PE=4 SV=1	tr|E1BZE1|E1BZE1_CHICK	A.APAAPPPPLGC(+57.02)DDPEIEAAAEFAVIYINGHSHHGYR.F	Y	58.66	3838.82	36	0.6	768.771	5	33.33		F19:704	5	19	54	Carbamidomethylation	C11:Carbamidomethylation:1000.00
Sample 1	25	56	12K serum protein beta-2-m cross-reactive (Fragment) OS=Gallus gallus PE=1 SV=1	tr|Q7LZS1|Q7LZS1_CHICK	K.GC(+57.02)MLDGVLYPFGEIPR.T	Y	36.32	1822.87	16	1.2	912.446	2	33.35		F19:705	2	15	30	Carbamidomethylation	C2:Carbamidomethylation:1000.00
Sample 1	4	7	Uncharacterized protein OS=Gallus gallus GN=AHSG PE=4 SV=1	tr|E1BZE1|E1BZE1_CHICK	A.PAAPPPPLGC(+57.02)DDPEIEAAAEFAVIYINGHSHHGYR.F	Y	48.83	3767.78	35	0.9	754.564	5	33.41		F19:707	2	20	54	Carbamidomethylation	C10:Carbamidomethylation:1000.00
Sample 1	2	3	Serum albumin OS=Gallus gallus GN=ALB PE=1 SV=2	P19121|ALBU_CHICK	K.C(+57.02)VANEDAPEC(+57.02)SKPLPSIILDEIC(+57.02)QVEK.L	Y	38.43	3113.47	27	1.5	1038.83	3	33.6		F19:713	4	80	106	Carbamidomethylation	C1:Carbamidomethylation:1000.00;C10:Carbamidomethylation:1000.00;C23:Carbamidomethylation:1000.00
Sample 1	29	45	Hemoglobin subunit alpha-A OS=Gallus gallus GN=HBAA PE=1 SV=2	P01994|HBA_CHICK	K.VVAALIEAANHIDDIAGTLSK.L	Y	20.41	2120.15	21	1.2	707.724	3	33.75		F19:718	1	63	83
Sample 1	14	39	Histone H2B 8 OS=Gallus gallus GN=H2B-VIII PE=1 SV=3	Q9PSW9|H2B8_CHICK	K.AM(+31.99)GIMNSFVNDIF.E	Y	23.23	1489.66	13	1.2	745.837	2	34.05		F19:726	2	59	71	Sulphone	M2:Sulphone:0.00
Sample 1	14	40	Histone H2B 5 OS=Gallus gallus GN=H2B-V PE=1 SV=2	P0C1H4|H2B5_CHICK	K.AM(+31.99)GIMNSFVNDIF.E	Y	23.23	1489.66	13	1.2	745.837	2	34.05		F19:726	2	59	71	Sulphone	M2:Sulphone:0.00
Sample 1	14	41	Histone H2B 1/2/3/4/6 OS=Gallus gallus GN=H2B-I PE=1 SV=2	P0C1H3|H2B1_CHICK	K.AM(+31.99)GIMNSFVNDIF.E	Y	23.23	1489.66	13	1.2	745.837	2	34.05		F19:726	2	59	71	Sulphone	M2:Sulphone:0.00
Sample 1	14	42	Histone H2B (Fragment) OS=Gallus gallus GN=HIST1H2B5L PE=3 SV=1	tr|A0A0A0MQ64|A0A0A0MQ64_CHICK	K.AM(+31.99)GIMNSFVNDIF.E	Y	23.23	1489.66	13	1.2	745.837	2	34.05		F19:726	2	76	88	Sulphone	M2:Sulphone:0.00
Sample 1	24	20	Vitronectin OS=Gallus gallus PE=2 SV=1	tr|O12945|O12945_CHICK	K.LISDVWGIEGPIDAAFTR.I	Y	36.48	1959.01	18	1.5	980.514	2	34.74		F19:741	2	193	210
Sample 1	24	21	Uncharacterized protein OS=Gallus gallus GN=VTN PE=4 SV=2	tr|E1C7A7|E1C7A7_CHICK	K.LISDVWGIEGPIDAAFTR.I	Y	36.48	1959.01	18	1.5	980.514	2	34.74		F19:741	2	193	210
Sample 1	6	8	SPARC OS=Gallus gallus GN=SPARC PE=4 SV=1	tr|F1P291|F1P291_CHICK	K.FIPAC(+57.02)LDTELTEF.P	Y	33.58	1554.73	13	0.6	778.371	2	35.11		F19:749	2	146	158	Carbamidomethylation	C5:Carbamidomethylation:1000.00
Sample 1	4	7	Uncharacterized protein OS=Gallus gallus GN=AHSG PE=4 SV=1	tr|E1BZE1|E1BZE1_CHICK	K.NPDVYLMLLEIGR.A	Y	42.26	1531.81	13	0.6	766.911	2	35.53		F19:758	3	172	184
Sample 1	7	10	Decorin OS=Gallus gallus GN=DCN PE=1 SV=1	P28675|PGS2_CHICK	K.AVFN(+.98)GLNQVIVL.E	Y	26.85	1286.72	12	1.3	644.37	2	35.56		F19:759	1	166	177	Deamidation (NQ)	N4:Deamidation (NQ):56.34
Sample 1	7	11	Decorin OS=Gallus gallus GN=DCN PE=4 SV=2	tr|E1BRE9|E1BRE9_CHICK	K.AVFN(+.98)GLNQVIVL.E	Y	26.85	1286.72	12	1.3	644.37	2	35.56		F19:759	1	166	177	Deamidation (NQ)	N4:Deamidation (NQ):56.34
Sample 1	7	10	Decorin OS=Gallus gallus GN=DCN PE=1 SV=1	P28675|PGS2_CHICK	K.ATYSGVSLFSNPVQYWEIQPSAFR.C	Y	22.48	2746.34	24	0.4	916.454	3	35.73		F19:764	1	320	343
Sample 1	7	11	Decorin OS=Gallus gallus GN=DCN PE=4 SV=2	tr|E1BRE9|E1BRE9_CHICK	K.ATYSGVSLFSNPVQYWEIQPSAFR.C	Y	22.48	2746.34	24	0.4	916.454	3	35.73		F19:764	1	320	343
Sample 1	4	7	Uncharacterized protein OS=Gallus gallus GN=AHSG PE=4 SV=1	tr|E1BZE1|E1BZE1_CHICK	K.NPDVY(+15.99)LM(+15.99)LLEIGR.A	Y	18.55	1563.8	13	1.2	782.907	2	35.79		F19:765	1	172	184	Oxidation or Hydroxylation; Oxidation (M)	Y5:Oxidation or Hydroxylation:9.86;M7:Oxidation (M):1000.00
Sample 1	6	8	SPARC OS=Gallus gallus GN=SPARC PE=4 SV=1	tr|F1P291|F1P291_CHICK	R.FFEAC(+57.02)DLDNDKYIALEEWASC(+57.02)FGIK.E	Y	33.15	3040.36	25	1.9	1014.46	3	35.87		F19:767	3	264	288	Carbamidomethylation	C5:Carbamidomethylation:1000.00;C21:Carbamidomethylation:1000.00
Sample 1	6	8	SPARC OS=Gallus gallus GN=SPARC PE=4 SV=1	tr|F1P291|F1P291_CHICK	R.FFE(+57.02)ACDLDNDKYIALEEWASC(+57.02)FGIK.E	Y	35.58	3040.36	25	1.6	1014.46	3	36.29		F19:776	1	264	288	Carbamidomethylation (DHKE X@N-term); Carbamidomethylation	E3:Carbamidomethylation (DHKE X@N-term):0.00;C21:Carbamidomethylation:1000.00
Sample 1	28	2189	Annexin A5 OS=Gallus gallus GN=ANXA5 PE=1 SV=2	P17153|ANXA5_CHICK	R.DLVDDLKSELTGKFETL.M	Y	26.58	1921.99	17	0.9	641.671	3	36.37		F19:778	2	64	80
Sample 1	28	2190	Annexin (Fragment) OS=Gallus gallus GN=ANXA5 PE=3 SV=1	tr|F1NJI0|F1NJI0_CHICK	R.DLVDDLKSELTGKFETL.M	Y	26.58	1921.99	17	0.9	641.671	3	36.37		F19:778	2	64	80
Sample 1	21	15	Cystatin OS=Gallus gallus PE=1 SV=2	P01038|CYT_CHICK	K.YTTC(+57.02)TFVVYSIPWLNQIK.L	Y	39.68	2232.13	18	0.7	1117.07	2	36.41		F19:779	1	115	132	Carbamidomethylation	C4:Carbamidomethylation:1000.00
Sample 1	21	16	Uncharacterized protein OS=Gallus gallus GN=CST3 PE=4 SV=1	tr|R4GLT1|R4GLT1_CHICK	K.YTTC(+57.02)TFVVYSIPWLNQIK.L	Y	39.68	2232.13	18	0.7	1117.07	2	36.41		F19:779	1	127	144	Carbamidomethylation	C4:Carbamidomethylation:1000.00
Sample 1	32	2187	Gelsolin OS=Gallus gallus GN=GSN PE=2 SV=1	O93510|GELS_CHICK	K.NLYGDFFTGDSYLVLNTIR.Q	Y	37.66	2207.09	19	2	1104.55	2	36.46		F19:780	1	80	98
Sample 1	32	2188	Uncharacterized protein OS=Gallus gallus GN=GSN PE=4 SV=1	tr|F1NKF3|F1NKF3_CHICK	K.NLYGDFFTGDSYLVLNTIR.Q	Y	37.66	2207.09	19	2	1104.55	2	36.46		F19:780	1	80	98
Sample 1	19	35	Lumican OS=Gallus gallus GN=LUM PE=1 SV=1	P51890|LUM_CHICK	K.GLNSLLYLDLSFNQLTK.L	Y	36.18	1938.05	17	1.5	970.032	2	36.82		F19:786	2	187	203
Sample 1	9	259	Uncharacterized protein (Fragment) OS=Gallus gallus GN=COL5A1 PE=4 SV=2	tr|F1NI79|F1NI79_CHICK	K.VEQVPIVDIMFNDFGEASQK.F	Y	42.91	2265.1	20	-0.2	756.04	3	37.19		F19:791	1	1767	1786
Sample 1	9	260	Alpha 1 (V) collagen OS=Gallus gallus PE=2 SV=1	tr|Q9IAU4|Q9IAU4_CHICK	K.VEQVPIVDIMFNDFGEASQK.F	Y	42.91	2265.1	20	-0.2	756.04	3	37.19		F19:791	1	1804	1823
Sample 1	16	12	Uncharacterized protein OS=Gallus gallus GN=LCN8 PE=3 SV=2	tr|E1C0K1|E1C0K1_CHICK	K.WYIVALASNTDFFLR.E	Y	50.98	1814.94	15	1.6	908.476	2	37.4		F19:795	2	34	48
Sample 1	1	1	Collagen alpha-2(I) chain OS=Gallus gallus GN=COL1A2 PE=4 SV=1	tr|F1P0H9|F1P0H9_CHICK	R.LPILDIAPLDIGGADQEFGLHIGPVC(+57.02)FK	Y	23.52	3004.57	28	0.7	1002.53	3	37.58		F19:797	1	1336	1363	Carbamidomethylation	C26:Carbamidomethylation:1000.00
Sample 1	2	3	Serum albumin OS=Gallus gallus GN=ALB PE=1 SV=2	P19121|ALBU_CHICK	R.RHPFLYAPAILSFAVDFEHALQSC(+57.02)C(+57.02)K.E	Y	52.99	3076.51	26	0.7	770.134	4	38.1		F19:803	5	173	198	Carbamidomethylation	C24:Carbamidomethylation:1000.00;C25:Carbamidomethylation:1000.00
Sample 1	3	4	Collagen alpha-1(I) chain OS=Gallus gallus GN=COL1A1 PE=1 SV=3	P02457|CO1A1_CHICK	K.TSRLPIIDLAP(+15.99)MDVGAPDQEFGIDIGPVC(+57.02)FL	Y	30.1	3371.68	31	1.1	1124.9	3	39.21		F19:821	1	1423	1453	Oxidation or Hydroxylation; Carbamidomethylation	P11:Oxidation or Hydroxylation:0.00;C29:Carbamidomethylation:1000.00
Sample 1	33	43	Alpha-1 type XI collagen (Fragment) OS=Gallus gallus PE=2 SV=1	tr|Q90796|Q90796_CHICK	K.FGFEVGPVC(+57.02)FLG	Y	35.83	1327.63	12	1	664.822	2	39.47		F19:824	1	877	888	Carbamidomethylation	C9:Carbamidomethylation:1000.00
Sample 1	35	2191	Ig lambda chain C region OS=Gallus gallus PE=4 SV=1	P20763|LAC_CHICK	K.ATLVC(+57.02)LINDFYPSPVTVDWVIDGSTR.S	Y	24.9	2937.46	26	0	980.16	3	40.06		F19:830	1	24	49	Carbamidomethylation	C5:Carbamidomethylation:1000.00
Sample 1	35	2192	Uncharacterized protein OS=Gallus gallus GN=Gga.849 PE=4 SV=1	tr|R9PXM5|R9PXM5_CHICK	K.ATLVC(+57.02)LINDFYPSPVTVDWVIDGSTR.S	Y	24.9	2937.46	26	0	980.16	3	40.06		F19:830	1	150	175	Carbamidomethylation	C5:Carbamidomethylation:1000.00
Sample 1	3	4	Collagen alpha-1(I) chain OS=Gallus gallus GN=COL1A1 PE=1 SV=3	P02457|CO1A1_CHICK	K.TSRLPIIDLAPMDVGAPDQEFGIDIGPVC(+57.02)FL	Y	25.32	3355.68	31	1	1119.57	3	40.9		F19:839	1	1423	1453	Carbamidomethylation	C29:Carbamidomethylation:1000.00
Sample 1	18	618	Uncharacterized protein OS=Gallus gallus GN=COL11A1 PE=4 SV=2	tr|F1P4K9|F1P4K9_CHICK	R.ILDEEVFEGEIQQLLIIADPR.A	Y	32.18	2439.29	21	0.8	814.104	3	41.98		F19:849	2	213	233
Sample 1	3	4	Collagen alpha-1(I) chain OS=Gallus gallus GN=COL1A1 PE=1 SV=3	P02457|CO1A1_CHICK	K.DGLNGLP(+15.99)GPIGP(+15.99)PGP(+15.99)R.G	Y	32.04	1560.79	16	0.5	781.403	2	48.5		F19:969	1	1142	1157	Oxidation or Hydroxylation	P7:Oxidation or Hydroxylation:22.87;P12:Oxidation or Hydroxylation:8.69;P15:Oxidation or Hydroxylation:0.00
Sample 2	3	4	Collagen alpha-1(I) chain OS=Gallus gallus GN=COL1A1 PE=1 SV=3	P02457|CO1A1_CHICK	R.DGAAGPKGDRGETGPAGPP(+15.99)GAP(+15.99)GAPGAP(+15.99)GPVGPAGK.N	Y	23.55	3092.49	36	0.5	774.13	4	13.11		F20:120	2	1016	1051	Oxidation or Hydroxylation	P19:Oxidation or Hydroxylation:17.01;P22:Oxidation or Hydroxylation:16.03;P28:Oxidation or Hydroxylation:22.85
Sample 2	3	4	Collagen alpha-1(I) chain OS=Gallus gallus GN=COL1A1 PE=1 SV=3	P02457|CO1A1_CHICK	R.DGAAGPKGDRGETGPAGPP(+15.99)GAPGAP(+15.99)GAP(+15.99)GPVGPAGK.N	Y	30.8	3092.49	36	1.3	1031.84	3	13.14		F20:121	2	1016	1051	Oxidation or Hydroxylation	P19:Oxidation or Hydroxylation:25.70;P25:Oxidation or Hydroxylation:39.44;P28:Oxidation or Hydroxylation:39.44
Sample 2	3	4	Collagen alpha-1(I) chain OS=Gallus gallus GN=COL1A1 PE=1 SV=3	P02457|CO1A1_CHICK	R.GAP(+15.99)GPP(+15.99)GAVGAAGKDGEAGAQGPP(+15.99)GPTGPAGER.G	Y	44.19	2855.34	33	1	952.789	3	13.5		F20:132	2	588	620	Oxidation or Hydroxylation	P3:Oxidation or Hydroxylation:18.53;P6:Oxidation or Hydroxylation:10.11;P24:Oxidation or Hydroxylation:92.69
Sample 2	3	4	Collagen alpha-1(I) chain OS=Gallus gallus GN=COL1A1 PE=1 SV=3	P02457|CO1A1_CHICK	R.GAP(+15.99)GPP(+15.99)GAVGAAGKDGEAGAQGPPGPTGPAGER.G	Y	30.84	2839.35	33	0.6	947.457	3	14.17		F20:148	2	588	620	Oxidation or Hydroxylation	P3:Oxidation or Hydroxylation:26.31;P6:Oxidation or Hydroxylation:17.01
Sample 2	1	1	Collagen alpha-2(I) chain OS=Gallus gallus GN=COL1A2 PE=4 SV=1	tr|F1P0H9|F1P0H9_CHICK	R.GASGPVGAKGPN(+.98)GDAGRP(+15.99)GEPGLMGP(+15.99)R.G	Y	39.44	2491.19	27	0.2	623.804	4	14.49		F20:156	1	423	449	Deamidation (NQ); Oxidation or Hydroxylation	N12:Deamidation (NQ):1000.00;P18:Oxidation or Hydroxylation:14.02;P26:Oxidation or Hydroxylation:0.00
Sample 2	1	1	Collagen alpha-2(I) chain OS=Gallus gallus GN=COL1A2 PE=4 SV=1	tr|F1P0H9|F1P0H9_CHICK	R.GPP(+15.99)GP(+15.99)SGPPGKDGRN(+.98)GLP(+15.99)GPIGPAGVR.G	Y	18.3	2509.27	27	1	628.325	4	15.62		F20:186	1	1053	1079	Oxidation or Hydroxylation; Deamidation (NQ)	P3:Oxidation or Hydroxylation:17.01;P5:Oxidation or Hydroxylation:0.00;N15:Deamidation (NQ):1000.00;P18:Oxidation or Hydroxylation:42.68
Sample 2	1	1	Collagen alpha-2(I) chain OS=Gallus gallus GN=COL1A2 PE=4 SV=1	tr|F1P0H9|F1P0H9_CHICK	R.GPP(+15.99)GPSGPPGKDGRN(+.98)GLP(+15.99)GPIGPAGVR.G	Y	35.69	2493.27	27	0.7	624.326	4	16.27		F20:207	2	1053	1079	Oxidation or Hydroxylation; Deamidation (NQ)	P3:Oxidation or Hydroxylation:14.02;N15:Deamidation (NQ):1000.00;P18:Oxidation or Hydroxylation:45.01
Sample 2	1	1	Collagen alpha-2(I) chain OS=Gallus gallus GN=COL1A2 PE=4 SV=1	tr|F1P0H9|F1P0H9_CHICK	R.GLP(+15.99)GAIGAPGP(+15.99)AGGAGDRGEGGPAGPAGPAGAR.G	Y	24.28	2724.33	33	-0.1	1363.17	2	16.29		F20:208	1	675	707	Oxidation or Hydroxylation	P3:Oxidation or Hydroxylation:0.00;P11:Oxidation or Hydroxylation:0.00
Sample 2	3	4	Collagen alpha-1(I) chain OS=Gallus gallus GN=COL1A1 PE=1 SV=3	P02457|CO1A1_CHICK	K.GSPGAD(+15.99)GPIGAP(+15.99)GTP(+15.99)GPQGIAGQR.G	Y	30.53	2162.04	24	1.3	1082.03	2	16.43		F20:212	1	924	947	Oxidation or Hydroxylation	D6:Oxidation or Hydroxylation:0.00;P12:Oxidation or Hydroxylation:51.63;P15:Oxidation or Hydroxylation:11.22
Sample 2	5	6	Apolipoprotein A-I OS=Gallus gallus GN=APOA1 PE=1 SV=2	P08250|APOA1_CHICK	K.NLAPYSDELRQK.L	Y	15.23	1432.73	12	0.7	717.373	2	16.49		F20:214	1	185	196
Sample 2	1	1	Collagen alpha-2(I) chain OS=Gallus gallus GN=COL1A2 PE=4 SV=1	tr|F1P0H9|F1P0H9_CHICK	K.GEIGPAGNVGPTGPAGPR.G	Y	48.97	1602.81	18	0.8	802.414	2	16.66		F20:219	2	264	281
Sample 2	3	4	Collagen alpha-1(I) chain OS=Gallus gallus GN=COL1A1 PE=1 SV=3	P02457|CO1A1_CHICK	R.GLTGPIGPP(+15.99)GPAGAPGD(+15.99)KGEAGPP(+15.99)GPAGPTGAR.G	Y	48.98	2878.42	33	1.8	960.483	3	16.74		F20:222	2	753	785	Oxidation or Hydroxylation	P9:Oxidation or Hydroxylation:63.97;D17:Oxidation or Hydroxylation:58.98;P24:Oxidation or Hydroxylation:67.40
Sample 2	3	4	Collagen alpha-1(I) chain OS=Gallus gallus GN=COL1A1 PE=1 SV=3	P02457|CO1A1_CHICK	R.GLTGPIGPP(+15.99)GPAGAP(+15.99)GDKGEAGPP(+15.99)GPAGPTGAR.G	Y	53.39	2878.42	33	1.7	960.482	3	16.92		F20:228	4	753	785	Oxidation or Hydroxylation	P9:Oxidation or Hydroxylation:61.69;P15:Oxidation or Hydroxylation:53.43;P24:Oxidation or Hydroxylation:65.46
Sample 2	1	1	Collagen alpha-2(I) chain OS=Gallus gallus GN=COL1A2 PE=4 SV=1	tr|F1P0H9|F1P0H9_CHICK	R.GLP(+15.99)GESGAVGPAGPIGSR.G	Y	42.81	1593.81	18	1.4	797.914	2	17.75		F20:255	2	591	608	Oxidation or Hydroxylation	P3:Oxidation or Hydroxylation:112.87
Sample 2	1	1	Collagen alpha-2(I) chain OS=Gallus gallus GN=COL1A2 PE=4 SV=1	tr|F1P0H9|F1P0H9_CHICK	R.GLP(+15.99)GESGAVGP(+31.99)AGPIGSR.G	Y	31.48	1625.8	18	0.4	813.908	2	17.91		F20:261	1	591	608	Oxidation or Hydroxylation; Dihydroxy	P3:Oxidation or Hydroxylation:26.33;P11:Dihydroxy:12.66
Sample 2	1	1	Collagen alpha-2(I) chain OS=Gallus gallus GN=COL1A2 PE=4 SV=1	tr|F1P0H9|F1P0H9_CHICK	R.GDAGPP(+15.99)GMTGFPGAAGR(+15.99).V	Y	29.81	1546.68	17	0.5	774.349	2	18.03		F20:265	2	777	793	Oxidation or Hydroxylation	P6:Oxidation or Hydroxylation:17.01;R17:Oxidation or Hydroxylation:0.00
Sample 2	1	1	Collagen alpha-2(I) chain OS=Gallus gallus GN=COL1A2 PE=4 SV=1	tr|F1P0H9|F1P0H9_CHICK	K.GETGPAGPP(+15.99)GFQGLP(+15.99)GPSGPAGEAGKP(+15.99)GER.G	Y	52.28	2776.31	30	1.1	926.443	3	18.11		F20:268	4	543	572	Oxidation or Hydroxylation	P9:Oxidation or Hydroxylation:67.69;P15:Oxidation or Hydroxylation:69.91;P27:Oxidation or Hydroxylation:57.10
Sample 2	1	1	Collagen alpha-2(I) chain OS=Gallus gallus GN=COL1A2 PE=4 SV=1	tr|F1P0H9|F1P0H9_CHICK	R.NGLP(+15.99)GPIGPAGVR.G	Y	32.02	1219.67	13	1.1	610.842	2	18.27		F20:273	2	1067	1079	Oxidation or Hydroxylation	P4:Oxidation or Hydroxylation:32.28
Sample 2	1	1	Collagen alpha-2(I) chain OS=Gallus gallus GN=COL1A2 PE=4 SV=1	tr|F1P0H9|F1P0H9_CHICK	R.VGPIGPAGNRGEP(+15.99)GNIGFP(+15.99)GPK.G	Y	33.58	2119.08	22	1.1	707.368	3	18.35		F20:276	1	476	497	Oxidation or Hydroxylation	P13:Oxidation or Hydroxylation:8.22;P19:Oxidation or Hydroxylation:0.00
Sample 2	3	4	Collagen alpha-1(I) chain OS=Gallus gallus GN=COL1A1 PE=1 SV=3	P02457|CO1A1_CHICK	R.GFSGLQGPP(+15.99)GPP(+15.99)GAP(+15.99)GEQGPSGASGPAGPR.G	Y	48.62	2688.25	30	0.9	1345.13	2	18.75		F20:289	6	1101	1130	Oxidation or Hydroxylation	P9:Oxidation or Hydroxylation:55.73;P12:Oxidation or Hydroxylation:130.57;P15:Oxidation or Hydroxylation:106.36
Sample 2	3	4	Collagen alpha-1(I) chain OS=Gallus gallus GN=COL1A1 PE=1 SV=3	P02457|CO1A1_CHICK	R.GQAGVMGFPGP(+15.99)K.G	Y	39.97	1160.56	12	0.6	581.29	2	18.95	23200000	F20:296	1	564	575	Oxidation or Hydroxylation	P11:Oxidation or Hydroxylation:0.00
Sample 2	1	1	Collagen alpha-2(I) chain OS=Gallus gallus GN=COL1A2 PE=4 SV=1	tr|F1P0H9|F1P0H9_CHICK	K.GAAGLP(+15.99)GVAGAP(+15.99)GLPGP(+15.99)R.G	Y	42.39	1561.82	18	1.2	781.919	2	19.07	190000000	F20:300	4	309	326	Oxidation or Hydroxylation	P6:Oxidation or Hydroxylation:181.07;P12:Oxidation or Hydroxylation:53.53;P17:Oxidation or Hydroxylation:0.00
Sample 2	3	4	Collagen alpha-1(I) chain OS=Gallus gallus GN=COL1A1 PE=1 SV=3	P02457|CO1A1_CHICK	R.GQAGVMGFP(+15.99)GPK.G	Y	39.8	1160.56	12	0.7	581.29	2	19.09	23200000	F20:301	2	564	575	Oxidation or Hydroxylation	P9:Oxidation or Hydroxylation:4.64
Sample 2	1	1	Collagen alpha-2(I) chain OS=Gallus gallus GN=COL1A2 PE=4 SV=1	tr|F1P0H9|F1P0H9_CHICK	K.GP(+15.99)KGETGPTGAIGPIGASGPP(+15.99)GPVGAAGPAGPR.G	Y	53.15	2836.45	33	1.3	946.491	3	19.12		F20:302	3	744	776	Oxidation or Hydroxylation	P2:Oxidation or Hydroxylation:0.00;P21:Oxidation or Hydroxylation:17.01
Sample 2	3	4	Collagen alpha-1(I) chain OS=Gallus gallus GN=COL1A1 PE=1 SV=3	P02457|CO1A1_CHICK	R.GFP(+15.99)GLP(+15.99)GPSGEPGK.Q	Y	36.41	1327.64	14	0.8	664.828	2	19.17	42100000	F20:304	2	960	973	Oxidation or Hydroxylation	P3:Oxidation or Hydroxylation:14.02;P6:Oxidation or Hydroxylation:45.01
Sample 2	1	1	Collagen alpha-2(I) chain OS=Gallus gallus GN=COL1A2 PE=4 SV=1	tr|F1P0H9|F1P0H9_CHICK	R.GLPGESGAVGPAGPIGSR.G	Y	28.71	1577.82	18	0.4	789.916	2	19.2		F20:305	1	591	608
Sample 2	1	1	Collagen alpha-2(I) chain OS=Gallus gallus GN=COL1A2 PE=4 SV=1	tr|F1P0H9|F1P0H9_CHICK	K.GPKGETGPTGAIGPIGASGPP(+15.99)GPVGAAGPAGPR.G	Y	52.93	2820.45	33	1.1	941.159	3	19.23		F20:306	3	744	776	Oxidation or Hydroxylation	P21:Oxidation or Hydroxylation:27.96
Sample 2	4	7	Uncharacterized protein OS=Gallus gallus GN=AHSG PE=4 SV=1	tr|E1BZE1|E1BZE1_CHICK	R.AAAEVAQHDKVPHPVGFVPPPPLC(+57.02)PGK.I	Y	46.17	2814.46	27	1.6	939.163	3	19.7		F20:322	8	312	338	Carbamidomethylation	C24:Carbamidomethylation:1000.00
Sample 2	1	1	Collagen alpha-2(I) chain OS=Gallus gallus GN=COL1A2 PE=4 SV=1	tr|F1P0H9|F1P0H9_CHICK	K.GAAGLP(+15.99)GVAGAP(+15.99)GLP(+15.99)GPR.G	Y	15.09	1561.82	18	1	781.919	2	19.79		F20:325	1	309	326	Oxidation or Hydroxylation	P6:Oxidation or Hydroxylation:34.77;P12:Oxidation or Hydroxylation:16.28;P15:Oxidation or Hydroxylation:0.00
Sample 2	12	28	Histone H2A-III OS=Gallus gallus PE=1 SV=2	P35062|H2A3_CHICK	L.AIRNDEELNKLLGK.V	Y	32.71	1611.89	14	0.6	538.306	3	19.99		F20:332	2	87	100
Sample 2	12	29	Histone H2A-IV OS=Gallus gallus PE=1 SV=2	P02263|H2A4_CHICK	L.AIRNDEELNKLLGK.V	Y	32.71	1611.89	14	0.6	538.306	3	19.99		F20:332	2	87	100
Sample 2	12	30	Histone H2A OS=Gallus gallus GN=H2A-VI PE=3 SV=2	tr|Q92069|Q92069_CHICK	L.AIRNDEELNKLLGK.V	Y	32.71	1611.89	14	0.6	538.306	3	19.99		F20:332	2	87	100
Sample 2	12	31	Histone H2A.J OS=Gallus gallus GN=H2A-IX PE=3 SV=1	P70082|H2AJ_CHICK	L.AIRNDEELNKLLGK.V	Y	32.71	1611.89	14	0.6	538.306	3	19.99		F20:332	2	87	100
Sample 2	4	7	Uncharacterized protein OS=Gallus gallus GN=AHSG PE=4 SV=1	tr|E1BZE1|E1BZE1_CHICK	K.VN(+.98)GQFSVLASK.C	Y	41.01	1149.6	11	0.9	575.809	2	20.43		F20:346	1	118	128	Deamidation (NQ)	N2:Deamidation (NQ):26.31
Sample 2	1	1	Collagen alpha-2(I) chain OS=Gallus gallus GN=COL1A2 PE=4 SV=1	tr|F1P0H9|F1P0H9_CHICK	R.N(+.98)GLP(+15.99)GPIGPAGVR.G	Y	36.55	1220.65	13	0.8	611.333	2	20.77		F20:357	3	1067	1079	Deamidation (NQ); Oxidation or Hydroxylation	N1:Deamidation (NQ):1000.00;P4:Oxidation or Hydroxylation:60.92
Sample 2	3	4	Collagen alpha-1(I) chain OS=Gallus gallus GN=COL1A1 PE=1 SV=3	P02457|CO1A1_CHICK	K.SLSQQIENIR.S	Y	18.07	1186.63	10	0.4	594.323	2	20.83		F20:359	1	1226	1235
Sample 2	1	1	Collagen alpha-2(I) chain OS=Gallus gallus GN=COL1A2 PE=4 SV=1	tr|F1P0H9|F1P0H9_CHICK	K.GETGPTGAIGPIGASGPP(+15.99)GPVGAAGPAGPR.G	Y	47.4	2538.28	30	1.3	1270.15	2	21.53		F20:383	6	747	776	Oxidation or Hydroxylation	P18:Oxidation or Hydroxylation:75.74
Sample 2	1	1	Collagen alpha-2(I) chain OS=Gallus gallus GN=COL1A2 PE=4 SV=1	tr|F1P0H9|F1P0H9_CHICK	R.GSDGSAGPTGPAGPIGAAGPP(+15.99)GFPGAP(+15.99)GAK.G	Y	44.51	2504.19	30	1.7	1253.11	2	21.68		F20:387	1	234	263	Oxidation or Hydroxylation	P21:Oxidation or Hydroxylation:100.91;P27:Oxidation or Hydroxylation:111.11
Sample 2	1	1	Collagen alpha-2(I) chain OS=Gallus gallus GN=COL1A2 PE=4 SV=1	tr|F1P0H9|F1P0H9_CHICK	R.GDP(+15.99)GPVGPVGPAGAFGPR.G	Y	50.97	1619.81	18	0.7	810.911	2	21.87		F20:390	4	978	995	Oxidation or Hydroxylation	P3:Oxidation or Hydroxylation:10.11
Sample 2	5	6	Apolipoprotein A-I OS=Gallus gallus GN=APOA1 PE=1 SV=2	P08250|APOA1_CHICK	R.IRDM(+15.99)VDVYLETVK.A	Y	37.74	1595.82	13	0.8	798.919	2	21.92		F20:392	3	34	46	Oxidation (M)	M4:Oxidation (M):1000.00
Sample 2	1	1	Collagen alpha-2(I) chain OS=Gallus gallus GN=COL1A2 PE=4 SV=1	tr|F1P0H9|F1P0H9_CHICK	R.GFP(+15.99)GTP(+15.99)GLP(+15.99)GFK.G	Y	34.54	1221.6	12	0.6	611.809	2	21.97		F20:394	4	165	176	Oxidation or Hydroxylation	P3:Oxidation or Hydroxylation:20.92;P6:Oxidation or Hydroxylation:29.96;P9:Oxidation or Hydroxylation:0.00
Sample 2	15	2181	Uncharacterized protein OS=Gallus gallus GN=LECT2 PE=4 SV=2	tr|F1NEF7|F1NEF7_CHICK	R.VFPGIISHIHVE(+57.02)NCDR.S	Y	16.01	1891.94	16	1.1	631.653	3	22.29		F20:405	1	293	308	Carbamidomethylation (DHKE X@N-term)	E12:Carbamidomethylation (DHKE X@N-term):3.64
Sample 2	15	2182	Myeloid protein 1 OS=Gallus gallus GN=MIM1 PE=1 SV=2	P08940|MIM1_CHICK	R.VFPGIISHIHVE(+57.02)NCDR.S	Y	16.01	1891.94	16	1.1	631.653	3	22.29		F20:405	1	293	308	Carbamidomethylation (DHKE X@N-term)	E12:Carbamidomethylation (DHKE X@N-term):3.64
Sample 2	1	1	Collagen alpha-2(I) chain OS=Gallus gallus GN=COL1A2 PE=4 SV=1	tr|F1P0H9|F1P0H9_CHICK	R.GDPGPVGPVGPAGAFGP(+15.99)R.G	Y	27.87	1619.81	18	0.3	810.91	2	22.53		F20:413	1	978	995	Oxidation or Hydroxylation	P17:Oxidation or Hydroxylation:0.00
Sample 2	8	54	Leukocyte ribonuclease A-2 OS=Gallus gallus PE=2 SV=1	tr|Q27J90|Q27J90_CHICK	R.NLNTLC(+57.02)INQPDQALR.T	Y	44.46	1768.89	15	1	885.453	2	22.68		F20:418	3	77	91	Carbamidomethylation	C6:Carbamidomethylation:1000.00
Sample 2	8	55	Ribonuclease homolog OS=Gallus gallus PE=2 SV=1	P30374|RSFR_CHICK	R.NLNTLC(+57.02)INQPDQALR.T	Y	44.46	1768.89	15	1	885.453	2	22.68		F20:418	3	77	91	Carbamidomethylation	C6:Carbamidomethylation:1000.00
Sample 2	5	6	Apolipoprotein A-I OS=Gallus gallus GN=APOA1 PE=1 SV=2	P08250|APOA1_CHICK	K.LEEIREK(+42.01)GIPQ(+.98)ASEY(+15.99)QAK.V	Y	17.98	2147.07	18	-1.8	1074.54	2	22.83		F20:423	1	201	218	Acetylation (K); Deamidation (NQ); Oxidation or Hydroxylation	K7:Acetylation (K):48.34;Q11:Deamidation (NQ):22.08;Y15:Oxidation or Hydroxylation:0.00
Sample 2	5	6	Apolipoprotein A-I OS=Gallus gallus GN=APOA1 PE=1 SV=2	P08250|APOA1_CHICK	K.L(+42.01)EEIREKGIPQASEY(+15.99)Q(+.98)AK.V	Y	17.85	2147.07	18	-1.2	1074.54	2	23.05		F20:430	1	201	218	Acetylation (N-term); Oxidation or Hydroxylation; Deamidation (NQ)	L1:Acetylation (N-term):1000.00;Y15:Oxidation or Hydroxylation:0.00;Q16:Deamidation (NQ):0.00
Sample 2	2	3	Serum albumin OS=Gallus gallus GN=ALB PE=1 SV=2	P19121|ALBU_CHICK	K.VSQPDFVQPYQRPASDVIC(+57.02)QEYQDNR.V	Y	31.89	3138.45	26	1.6	1047.16	3	23.09		F20:431	1	134	159	Carbamidomethylation	C19:Carbamidomethylation:1000.00
Sample 2	5	6	Apolipoprotein A-I OS=Gallus gallus GN=APOA1 PE=1 SV=2	P08250|APOA1_CHICK	K.IRPFLDQFSAK.W	Y	44.87	1320.72	11	1.4	661.368	2	23.44		F20:440	3	120	130
Sample 2	14	39	Histone H2B 8 OS=Gallus gallus GN=H2B-VIII PE=1 SV=3	Q9PSW9|H2B8_CHICK	A.VRLLLPGELAK.H	Y	23.08	1207.77	11	0.7	604.89	2	23.5		F20:442	1	99	109
Sample 2	14	40	Histone H2B 5 OS=Gallus gallus GN=H2B-V PE=1 SV=2	P0C1H4|H2B5_CHICK	A.VRLLLPGELAK.H	Y	23.08	1207.77	11	0.7	604.89	2	23.5		F20:442	1	99	109
Sample 2	14	41	Histone H2B 1/2/3/4/6 OS=Gallus gallus GN=H2B-I PE=1 SV=2	P0C1H3|H2B1_CHICK	A.VRLLLPGELAK.H	Y	23.08	1207.77	11	0.7	604.89	2	23.5		F20:442	1	99	109
Sample 2	14	42	Histone H2B (Fragment) OS=Gallus gallus GN=HIST1H2B5L PE=3 SV=1	tr|A0A0A0MQ64|A0A0A0MQ64_CHICK	A.VRLLLPGELAK.H	Y	23.08	1207.77	11	0.7	604.89	2	23.5		F20:442	1	116	126
Sample 2	1	1	Collagen alpha-2(I) chain OS=Gallus gallus GN=COL1A2 PE=4 SV=1	tr|F1P0H9|F1P0H9_CHICK	R.GLP(+15.99)GIAGATGEPGPLGVSGPPGAR(+15.99).G	Y	42.1	2116.09	24	1.5	1059.05	2	23.57		F20:444	3	882	905	Oxidation or Hydroxylation	P3:Oxidation or Hydroxylation:159.26;R24:Oxidation or Hydroxylation:0.00
Sample 2	5	6	Apolipoprotein A-I OS=Gallus gallus GN=APOA1 PE=1 SV=2	P08250|APOA1_CHICK	K.MTPLVQEFR.E	Y	40.61	1119.57	9	1.1	560.795	2	23.63		F20:446	2	230	238
Sample 2	7	10	Decorin OS=Gallus gallus GN=DCN PE=1 SV=1	P28675|PGS2_CHICK	K.ISPAAFAPLK.K	Y	41.22	1013.59	10	0.3	507.803	2	23.66		F20:447	2	118	127
Sample 2	7	11	Decorin OS=Gallus gallus GN=DCN PE=4 SV=2	tr|E1BRE9|E1BRE9_CHICK	K.ISPAAFAPLK.K	Y	41.22	1013.59	10	0.3	507.803	2	23.66		F20:447	2	118	127
Sample 2	17	34	Tetranectin OS=Gallus gallus GN=CLEC3B PE=2 SV=1	tr|Q9DDD4|Q9DDD4_CHICK	R.YKNWETEITTQPDGGKLENC(+57.02)AALSGVAVGK.W	Y	20.32	3235.58	30	1	809.904	4	23.75		F20:450	1	153	182	Carbamidomethylation	C20:Carbamidomethylation:1000.00
Sample 2	14	39	Histone H2B 8 OS=Gallus gallus GN=H2B-VIII PE=1 SV=3	Q9PSW9|H2B8_CHICK	R.LLLPGELAK.H	Y	15.62	952.596	9	0.7	477.305	2	23.87		F20:454	3	101	109
Sample 2	14	40	Histone H2B 5 OS=Gallus gallus GN=H2B-V PE=1 SV=2	P0C1H4|H2B5_CHICK	R.LLLPGELAK.H	Y	15.62	952.596	9	0.7	477.305	2	23.87		F20:454	3	101	109
Sample 2	14	41	Histone H2B 1/2/3/4/6 OS=Gallus gallus GN=H2B-I PE=1 SV=2	P0C1H3|H2B1_CHICK	R.LLLPGELAK.H	Y	15.62	952.596	9	0.7	477.305	2	23.87		F20:454	3	101	109
Sample 2	14	42	Histone H2B (Fragment) OS=Gallus gallus GN=HIST1H2B5L PE=3 SV=1	tr|A0A0A0MQ64|A0A0A0MQ64_CHICK	R.LLLPGELAK.H	Y	15.62	952.596	9	0.7	477.305	2	23.87		F20:454	3	118	126
Sample 2	26	74	Histone H4 OS=Gallus gallus GN=H4-I PE=1 SV=2	P62801|H4_CHICK	F.LENVIRDAVTYTEHAK.R	Y	42.93	1857.96	16	1.1	620.327	3	23.9		F20:455	1	63	78
Sample 2	26	75	Histone H4 type VIII OS=Gallus gallus GN=H4-VIII PE=3 SV=3	P70081|H48_CHICK	F.LENVIRDAVTYTEHAK.R	Y	42.93	1857.96	16	1.1	620.327	3	23.9		F20:455	1	63	78
Sample 2	1	1	Collagen alpha-2(I) chain OS=Gallus gallus GN=COL1A2 PE=4 SV=1	tr|F1P0H9|F1P0H9_CHICK	R.GLP(+15.99)GIAGATGEPGPLGVSGP(+15.99)PGAR.G	Y	24.03	2116.09	24	0.2	1059.05	2	23.93		F20:456	1	882	905	Oxidation or Hydroxylation	P3:Oxidation or Hydroxylation:74.73;P20:Oxidation or Hydroxylation:0.00
Sample 2	5	6	Apolipoprotein A-I OS=Gallus gallus GN=APOA1 PE=1 SV=2	P08250|APOA1_CHICK	R.DM(+15.99)VDVYLETVK.A	Y	35.07	1326.64	11	2	664.327	2	23.99		F20:457	1	36	46	Oxidation (M)	M2:Oxidation (M):1000.00
Sample 2	15	2181	Uncharacterized protein OS=Gallus gallus GN=LECT2 PE=4 SV=2	tr|F1NEF7|F1NEF7_CHICK	Q.Q(-17.03)DAHWAVVC(+57.02)AGNPTNEIR.G	Y	39.62	2019.92	18	1	1010.97	2	24.03		F20:458	1	178	195	Pyro-glu from Q; Carbamidomethylation	Q1:Pyro-glu from Q:1000.00;C9:Carbamidomethylation:1000.00
Sample 2	15	2182	Myeloid protein 1 OS=Gallus gallus GN=MIM1 PE=1 SV=2	P08940|MIM1_CHICK	Q.Q(-17.03)DAHWAVVC(+57.02)AGNPTNEIR.G	Y	39.62	2019.92	18	1	1010.97	2	24.03		F20:458	1	178	195	Pyro-glu from Q; Carbamidomethylation	Q1:Pyro-glu from Q:1000.00;C9:Carbamidomethylation:1000.00
Sample 2	14	39	Histone H2B 8 OS=Gallus gallus GN=H2B-VIII PE=1 SV=3	Q9PSW9|H2B8_CHICK	L.PGELAK.H	Y	24.5	613.343	6	0.8	614.351	1	24.07		F20:459	1	104	109
Sample 2	14	40	Histone H2B 5 OS=Gallus gallus GN=H2B-V PE=1 SV=2	P0C1H4|H2B5_CHICK	L.PGELAK.H	Y	24.5	613.343	6	0.8	614.351	1	24.07		F20:459	1	104	109
Sample 2	14	41	Histone H2B 1/2/3/4/6 OS=Gallus gallus GN=H2B-I PE=1 SV=2	P0C1H3|H2B1_CHICK	L.PGELAK.H	Y	24.5	613.343	6	0.8	614.351	1	24.07		F20:459	1	104	109
Sample 2	14	42	Histone H2B (Fragment) OS=Gallus gallus GN=HIST1H2B5L PE=3 SV=1	tr|A0A0A0MQ64|A0A0A0MQ64_CHICK	L.PGELAK.H	Y	24.5	613.343	6	0.8	614.351	1	24.07		F20:459	1	121	126
Sample 2	4	7	Uncharacterized protein OS=Gallus gallus GN=AHSG PE=4 SV=1	tr|E1BZE1|E1BZE1_CHICK	K.M(+15.99)VTEPSQDLIAEC(+57.02)QLYGHQPGVTYPHPGQDTSAGLVPSAGQGFTNHNLK.I	Y	29.44	5262.48	49	2	1053.5	5	24.22		F20:464	3	235	283	Oxidation (M); Carbamidomethylation	M1:Oxidation (M):1000.00;C13:Carbamidomethylation:1000.00
Sample 2	2	3	Serum albumin OS=Gallus gallus GN=ALB PE=1 SV=2	P19121|ALBU_CHICK	R.SQC(+57.02)IM(+15.99)EAEFDEKPADLPSLVEK.Y	Y	46.82	2551.18	22	0.5	851.402	3	24.48		F20:472	2	315	336	Carbamidomethylation; Oxidation (M)	C3:Carbamidomethylation:1000.00;M5:Oxidation (M):1000.00
Sample 2	6	8	SPARC OS=Gallus gallus GN=SPARC PE=4 SV=1	tr|F1P291|F1P291_CHICK	K.EQDIDKDLVI	Y	25.53	1186.61	10	0.3	594.312	2	24.51		F20:473	4	289	298
Sample 2	4	7	Uncharacterized protein OS=Gallus gallus GN=AHSG PE=4 SV=1	tr|E1BZE1|E1BZE1_CHICK	K.MVTEPSQDLIAEC(+57.02)QLYGHQPGVTYPHPGQDTSAGLVPSAGQGFTNHNLK.I	Y	22.45	5246.48	49	1.3	1050.31	5	24.57		F20:475	1	235	283	Carbamidomethylation	C13:Carbamidomethylation:1000.00
Sample 2	2	3	Serum albumin OS=Gallus gallus GN=ALB PE=1 SV=2	P19121|ALBU_CHICK	K.TIADGFTAMVDK.C	Y	45.98	1267.61	12	0.8	634.814	2	25.21		F20:489	4	574	585
Sample 2	5	6	Apolipoprotein A-I OS=Gallus gallus GN=APOA1 PE=1 SV=2	P08250|APOA1_CHICK	R.LTPVAQELKELTK.Q	Y	42.67	1468.85	13	1	735.433	2	25.24		F20:490	4	142	154
Sample 2	5	6	Apolipoprotein A-I OS=Gallus gallus GN=APOA1 PE=1 SV=2	P08250|APOA1_CHICK	T.PVAQELKELTK.Q	Y	20.51	1254.72	11	1	628.367	2	25.39		F20:495	1	144	154
Sample 2	8	54	Leukocyte ribonuclease A-2 OS=Gallus gallus PE=2 SV=1	tr|Q27J90|Q27J90_CHICK	K.TSFPSNAAYC(+57.02)NVMMVR.R	Y	35.72	1846.82	16	2.1	924.417	2	25.63		F20:502	1	40	55	Carbamidomethylation	C10:Carbamidomethylation:1000.00
Sample 2	8	55	Ribonuclease homolog OS=Gallus gallus PE=2 SV=1	P30374|RSFR_CHICK	K.TSFPSNAAYC(+57.02)NVMMVR.R	Y	35.72	1846.82	16	2.1	924.417	2	25.63		F20:502	1	40	55	Carbamidomethylation	C10:Carbamidomethylation:1000.00
Sample 2	2	3	Serum albumin OS=Gallus gallus GN=ALB PE=1 SV=2	P19121|ALBU_CHICK	K.QSDINTC(+57.02)FGEEGANLIVQSR.A	Y	42.4	2237.04	20	1	746.687	3	25.87		F20:508	6	589	608	Carbamidomethylation	C7:Carbamidomethylation:1000.00
Sample 2	34	37	Osteocalcin OS=Gallus gallus GN=BGLAP PE=1 SV=2	P02822|OSTCN_CHICK	R.EVC(+57.02)ELSPDC(+57.02)DELADQIGFQEAYRR.F	Y	27.61	2899.28	24	1.2	967.433	3	25.92		F20:510	1	69	92	Carbamidomethylation	C3:Carbamidomethylation:1000.00;C9:Carbamidomethylation:1000.00
Sample 2	5	6	Apolipoprotein A-I OS=Gallus gallus GN=APOA1 PE=1 SV=2	P08250|APOA1_CHICK	K.DTEALRAELTKDLEEVKEK.I	Y	29.31	2216.15	19	1.1	555.046	4	26.03		F20:513	1	101	119
Sample 2	2	3	Serum albumin OS=Gallus gallus GN=ALB PE=1 SV=2	P19121|ALBU_CHICK	D.TKYVPPPFNPDM(+15.99)FSFDEK.L	Y	31.4	2174	18	1.1	725.676	3	26.15		F20:517	4	523	540	Oxidation (M)	M12:Oxidation (M):1000.00
Sample 2	3	4	Collagen alpha-1(I) chain OS=Gallus gallus GN=COL1A1 PE=1 SV=3	P02457|CO1A1_CHICK	K.ALLLQGANEIEIR.A	Y	43.8	1438.81	13	1	720.415	2	26.47		F20:525	3	1376	1388
Sample 2	12	28	Histone H2A-III OS=Gallus gallus PE=1 SV=2	P35062|H2A3_CHICK	K.VTIAQGGVLPNIQ.A	Y	24.98	1308.74	13	0.2	655.377	2	26.56		F20:528	1	101	113
Sample 2	12	29	Histone H2A-IV OS=Gallus gallus PE=1 SV=2	P02263|H2A4_CHICK	K.VTIAQGGVLPNIQ.A	Y	24.98	1308.74	13	0.2	655.377	2	26.56		F20:528	1	101	113
Sample 2	12	30	Histone H2A OS=Gallus gallus GN=H2A-VI PE=3 SV=2	tr|Q92069|Q92069_CHICK	K.VTIAQGGVLPNIQ.A	Y	24.98	1308.74	13	0.2	655.377	2	26.56		F20:528	1	101	113
Sample 2	12	31	Histone H2A.J OS=Gallus gallus GN=H2A-IX PE=3 SV=1	P70082|H2AJ_CHICK	K.VTIAQGGVLPNIQ.A	Y	24.98	1308.74	13	0.2	655.377	2	26.56		F20:528	1	101	113
Sample 2	16	12	Uncharacterized protein OS=Gallus gallus GN=LCN8 PE=3 SV=2	tr|E1C0K1|E1C0K1_CHICK	R.EVSPTAMAIFR.K	Y	30.52	1220.62	11	0.1	611.318	2	26.63		F20:530	1	141	151
Sample 2	1	1	Collagen alpha-2(I) chain OS=Gallus gallus GN=COL1A2 PE=4 SV=1	tr|F1P0H9|F1P0H9_CHICK	K.AADFGPGPM(+15.99)GLM(+15.99)GPR.G	Y	47.42	1504.68	15	0.5	753.348	2	26.86		F20:536	2	84	98	Oxidation (M)	M9:Oxidation (M):1000.00;M12:Oxidation (M):1000.00
Sample 2	2	3	Serum albumin OS=Gallus gallus GN=ALB PE=1 SV=2	P19121|ALBU_CHICK	R.MAC(+57.02)SEGYLSIVIHDTC(+57.02)R.K	Y	38.13	2010.9	17	0.3	671.306	3	26.92		F20:538	1	474	490	Carbamidomethylation	C3:Carbamidomethylation:1000.00;C16:Carbamidomethylation:1000.00
Sample 2	1	1	Collagen alpha-2(I) chain OS=Gallus gallus GN=COL1A2 PE=4 SV=1	tr|F1P0H9|F1P0H9_CHICK	A.DFGPGPMGLMGPR.G	Y	38.89	1330.62	13	1.6	666.317	2	27.65		F20:555	2	86	98
Sample 2	1	1	Collagen alpha-2(I) chain OS=Gallus gallus GN=COL1A2 PE=4 SV=1	tr|F1P0H9|F1P0H9_CHICK	A.DFGPGP(+15.99)MGLM(+15.99)GPR.G	Y	37.61	1362.61	13	0.6	682.311	2	27.8		F20:559	1	86	98	Oxidation or Hydroxylation; Oxidation (M)	P6:Oxidation or Hydroxylation:43.88;M10:Oxidation (M):32.69
Sample 2	2	3	Serum albumin OS=Gallus gallus GN=ALB PE=1 SV=2	P19121|ALBU_CHICK	K.AVAM(+15.99)ITFAQYLQR.C	Y	45.4	1526.79	13	-0.5	764.403	2	27.93		F20:563	2	48	60	Oxidation (M)	M4:Oxidation (M):1000.00
Sample 2	4	7	Uncharacterized protein OS=Gallus gallus GN=AHSG PE=4 SV=1	tr|E1BZE1|E1BZE1_CHICK	K.D(+57.02)NLAACQLLPEDQSNFGFC(+57.02)TAK.M	Y	33.58	2498.12	22	1.9	1250.07	2	27.95		F20:564	2	213	234	Carbamidomethylation (DHKE X@N-term); Carbamidomethylation	D1:Carbamidomethylation (DHKE X@N-term):32.22;C19:Carbamidomethylation:1000.00
Sample 2	2	3	Serum albumin OS=Gallus gallus GN=ALB PE=1 SV=2	P19121|ALBU_CHICK	L.LINLIK.R	Y	21.55	712.485	6	0.2	713.492	1	28.03		F20:566	1	557	562
Sample 2	2	3	Serum albumin OS=Gallus gallus GN=ALB PE=1 SV=2	P19121|ALBU_CHICK	D.TKYVPPPFNPDMFSFDEK.L	Y	37.9	2158.01	18	0.6	720.344	3	28.85		F20:579	2	523	540
Sample 2	16	12	Uncharacterized protein OS=Gallus gallus GN=LCN8 PE=3 SV=2	tr|E1C0K1|E1C0K1_CHICK	R.ISFLGEDELEVSYAAPSPK.G	Y	41.36	2051.01	19	1.4	1026.51	2	28.98		F20:583	2	60	78
Sample 2	7	10	Decorin OS=Gallus gallus GN=DCN PE=1 SV=1	P28675|PGS2_CHICK	K.IASIGINDFC(+57.02)PLGYNTK.K	Y	25.84	1881.93	17	3.6	941.975	2	29.21		F20:586	1	302	318	Carbamidomethylation	C10:Carbamidomethylation:1000.00
Sample 2	7	11	Decorin OS=Gallus gallus GN=DCN PE=4 SV=2	tr|E1BRE9|E1BRE9_CHICK	K.IASIGINDFC(+57.02)PLGYNTK.K	Y	25.84	1881.93	17	3.6	941.975	2	29.21		F20:586	1	302	318	Carbamidomethylation	C10:Carbamidomethylation:1000.00
Sample 2	2	3	Serum albumin OS=Gallus gallus GN=ALB PE=1 SV=2	P19121|ALBU_CHICK	K.YVPPPFNPDM(+15.99)FSFDEK.L	Y	36.15	1944.86	16	0.7	649.294	3	29.33		F20:589	2	525	540	Oxidation (M)	M10:Oxidation (M):1000.00
Sample 2	2	3	Serum albumin OS=Gallus gallus GN=ALB PE=1 SV=2	P19121|ALBU_CHICK	R.VSFLGHFIYSVAR.R	Y	41.87	1494.8	13	0.6	748.407	2	29.92		F20:600	4	160	172
Sample 2	17	34	Tetranectin OS=Gallus gallus GN=CLEC3B PE=2 SV=1	tr|Q9DDD4|Q9DDD4_CHICK	R.C(+57.02)KEQLPYVC(+57.02)QFM(+15.99)IV	Y	25.23	1829.85	14	1.1	915.934	2	29.95		F20:601	1	188	201	Carbamidomethylation; Oxidation (M)	C1:Carbamidomethylation:1000.00;C9:Carbamidomethylation:1000.00;M12:Oxidation (M):1000.00
Sample 2	7	10	Decorin OS=Gallus gallus GN=DCN PE=1 SV=1	P28675|PGS2_CHICK	R.KAVFNGLNQVIVL.E	Y	18.18	1413.83	13	0.6	707.925	2	30.4		F20:608	1	165	177
Sample 2	7	11	Decorin OS=Gallus gallus GN=DCN PE=4 SV=2	tr|E1BRE9|E1BRE9_CHICK	R.KAVFNGLNQVIVL.E	Y	18.18	1413.83	13	0.6	707.925	2	30.4		F20:608	1	165	177
Sample 2	2	3	Serum albumin OS=Gallus gallus GN=ALB PE=1 SV=2	P19121|ALBU_CHICK	K.AVAMITFAQYLQR.C	Y	45.7	1510.8	13	1.1	756.406	2	31.57		F20:633	3	48	60
Sample 2	4	7	Uncharacterized protein OS=Gallus gallus GN=AHSG PE=4 SV=1	tr|E1BZE1|E1BZE1_CHICK	A.APAAPPPPLGC(+57.02)DDPEIEAAAEFAVIYIN(+.98)GHSHHGYR.F	Y	63.86	3839.8	36	0.3	768.967	5	31.74		F20:638	6	19	54	Carbamidomethylation; Deamidation (NQ)	C11:Carbamidomethylation:1000.00;N28:Deamidation (NQ):1000.00
Sample 2	19	35	Lumican OS=Gallus gallus GN=LUM PE=1 SV=1	P51890|LUM_CHICK	K.SIPTVSENLENFYLQVNK.I	Y	27.54	2094.06	18	1.8	1048.04	2	31.77		F20:639	1	273	290
Sample 2	2	3	Serum albumin OS=Gallus gallus GN=ALB PE=1 SV=2	P19121|ALBU_CHICK	K.YVPPPF(+15.99)NPDMFSFDEK.L	Y	20.55	1944.86	16	2.7	973.44	2	32.09		F20:647	1	525	540	Oxidation or Hydroxylation	F6:Oxidation or Hydroxylation:0.00
Sample 2	6	8	SPARC OS=Gallus gallus GN=SPARC PE=4 SV=1	tr|F1P291|F1P291_CHICK	K.NYNMYIFPVHWQFGQLDQHPIDGYLSHTELAPLR.A	Y	42.05	4098.98	34	1.7	820.805	5	32.37		F20:653	2	218	251
Sample 2	6	8	SPARC OS=Gallus gallus GN=SPARC PE=4 SV=1	tr|F1P291|F1P291_CHICK	K.FIPAC(+57.02)LDTELTEFPLR.M	Y	48.3	1920.97	16	1.1	961.491	2	32.88		F20:660	4	146	161	Carbamidomethylation	C5:Carbamidomethylation:1000.00
Sample 2	6	8	SPARC OS=Gallus gallus GN=SPARC PE=4 SV=1	tr|F1P291|F1P291_CHICK	K.FIP(+31.99)AC(+57.02)LDTELTEFPLR.M	Y	29.76	1952.96	16	0.3	977.485	2	33.05		F20:665	1	146	161	Dihydroxy; Carbamidomethylation	P3:Dihydroxy:14.04;C5:Carbamidomethylation:1000.00
Sample 2	1	1	Collagen alpha-2(I) chain OS=Gallus gallus GN=COL1A2 PE=4 SV=1	tr|F1P0H9|F1P0H9_CHICK	R.TNKPSRLPILDIAPLDIGGADQEFGLHIGPVC(+57.02)FK	Y	53.49	3687.94	34	1	922.994	4	33.43		F20:675	4	1330	1363	Carbamidomethylation	C32:Carbamidomethylation:1000.00
Sample 2	1	1	Collagen alpha-2(I) chain OS=Gallus gallus GN=COL1A2 PE=4 SV=1	tr|F1P0H9|F1P0H9_CHICK	R.TNKPSRLPILDIAPLDIGGADQ(+.98)EFGLHIGPVC(+57.02)FK	Y	24.39	3688.93	34	6.3	738.798	5	33.65		F20:682	1	1330	1363	Deamidation (NQ); Carbamidomethylation	Q22:Deamidation (NQ):0.00;C32:Carbamidomethylation:1000.00
Sample 2	13	620	Uncharacterized protein OS=Gallus gallus GN=LYG2 PE=4 SV=1	tr|F1P5H6|F1P5H6_CHICK	R.VGEALC(+57.02)IEPAVIAGIISR.E	Y	48.27	1867.02	18	1.2	934.52	2	34.16		F20:696	6	81	98	Carbamidomethylation	C6:Carbamidomethylation:1000.00
Sample 2	13	621	Lysozyme g OS=Gallus gallus PE=2 SV=1	P27042|LYG_CHICK	R.VGEALC(+57.02)IEPAVIAGIISR.E	Y	48.27	1867.02	18	1.2	934.52	2	34.16		F20:696	6	81	98	Carbamidomethylation	C6:Carbamidomethylation:1000.00
Sample 2	14	39	Histone H2B 8 OS=Gallus gallus GN=H2B-VIII PE=1 SV=3	Q9PSW9|H2B8_CHICK	K.AM(+15.99)GIMNSFVNDIFER.I	Y	45.13	1758.81	15	1.7	880.412	2	34.34		F20:701	3	59	73	Oxidation (M)	M2:Oxidation (M):32.97
Sample 2	14	40	Histone H2B 5 OS=Gallus gallus GN=H2B-V PE=1 SV=2	P0C1H4|H2B5_CHICK	K.AM(+15.99)GIMNSFVNDIFER.I	Y	45.13	1758.81	15	1.7	880.412	2	34.34		F20:701	3	59	73	Oxidation (M)	M2:Oxidation (M):32.97
Sample 2	14	41	Histone H2B 1/2/3/4/6 OS=Gallus gallus GN=H2B-I PE=1 SV=2	P0C1H3|H2B1_CHICK	K.AM(+15.99)GIMNSFVNDIFER.I	Y	45.13	1758.81	15	1.7	880.412	2	34.34		F20:701	3	59	73	Oxidation (M)	M2:Oxidation (M):32.97
Sample 2	14	42	Histone H2B (Fragment) OS=Gallus gallus GN=HIST1H2B5L PE=3 SV=1	tr|A0A0A0MQ64|A0A0A0MQ64_CHICK	K.AM(+15.99)GIMNSFVNDIFER.I	Y	45.13	1758.81	15	1.7	880.412	2	34.34		F20:701	3	76	90	Oxidation (M)	M2:Oxidation (M):32.97
Sample 2	17	34	Tetranectin OS=Gallus gallus GN=CLEC3B PE=2 SV=1	tr|Q9DDD4|Q9DDD4_CHICK	K.SIGNEAEIWLGLNDMVAEGK.W	Y	33.83	2145.04	20	1.3	1073.53	2	34.74		F20:708	3	123	142
Sample 2	22	2183	Heterochromatin-associated protein MENT OS=Gallus gallus GN=SERPINB10 PE=1 SV=1	O73790|SPB10_CHICK	R.ELSMFILLPDDIKDGTTGLEQLER.E	Y	41.62	2732.39	24	0.9	911.806	3	35.2		F20:716	2	253	276
Sample 2	9	259	Uncharacterized protein (Fragment) OS=Gallus gallus GN=COL5A1 PE=4 SV=2	tr|F1NI79|F1NI79_CHICK	K.LLSYVDSDGNPIGVVQMTFLR.L	Y	43.93	2323.19	21	0.6	1162.6	2	35.77		F20:725	3	1672	1692
Sample 2	9	260	Alpha 1 (V) collagen OS=Gallus gallus PE=2 SV=1	tr|Q9IAU4|Q9IAU4_CHICK	K.LLSYVDSDGNPIGVVQMTFLR.L	Y	43.93	2323.19	21	0.6	1162.6	2	35.77		F20:725	3	1709	1729
Sample 2	9	259	Uncharacterized protein (Fragment) OS=Gallus gallus GN=COL5A1 PE=4 SV=2	tr|F1NI79|F1NI79_CHICK	K.FGFEVGPAC(+57.02)FMG	Y	35.68	1317.55	12	1	659.784	2	35.83		F20:726	1	1787	1798	Carbamidomethylation	C9:Carbamidomethylation:1000.00
Sample 2	9	260	Alpha 1 (V) collagen OS=Gallus gallus PE=2 SV=1	tr|Q9IAU4|Q9IAU4_CHICK	K.FGFEVGPAC(+57.02)FMG	Y	35.68	1317.55	12	1	659.784	2	35.83		F20:726	1	1824	1835	Carbamidomethylation	C9:Carbamidomethylation:1000.00
Sample 2	6	8	SPARC OS=Gallus gallus GN=SPARC PE=4 SV=1	tr|F1P291|F1P291_CHICK	R.FFEACD(+57.02)LDNDKYIALEEWASC(+57.02)FGIK.E	Y	36.15	3040.36	25	1.6	1014.46	3	36.13		F20:732	1	264	288	Carbamidomethylation (DHKE X@N-term); Carbamidomethylation	D6:Carbamidomethylation (DHKE X@N-term):0.00;C21:Carbamidomethylation:1000.00
Sample 2	9	259	Uncharacterized protein (Fragment) OS=Gallus gallus GN=COL5A1 PE=4 SV=2	tr|F1NI79|F1NI79_CHICK	K.TVLEINTPKVEQVPIVDIMFNDFGEASQK.F	Y	31.72	3260.66	29	1.4	1087.9	3	36.19		F20:734	2	1758	1786
Sample 2	9	260	Alpha 1 (V) collagen OS=Gallus gallus PE=2 SV=1	tr|Q9IAU4|Q9IAU4_CHICK	K.TVLEINTPKVEQVPIVDIMFNDFGEASQK.F	Y	31.72	3260.66	29	1.4	1087.9	3	36.19		F20:734	2	1795	1823
Sample 2	3	4	Collagen alpha-1(I) chain OS=Gallus gallus GN=COL1A1 PE=1 SV=3	P02457|CO1A1_CHICK	K.TSRLPIIDLAPMD(+15.99)VGAPDQEFGIDIGPVC(+57.02)FL	Y	25.81	3371.68	31	1.1	1124.9	3	39.2		F20:768	1	1423	1453	Oxidation or Hydroxylation; Carbamidomethylation	D13:Oxidation or Hydroxylation:0.00;C29:Carbamidomethylation:1000.00
Sample 2	9	259	Uncharacterized protein (Fragment) OS=Gallus gallus GN=COL5A1 PE=4 SV=2	tr|F1NI79|F1NI79_CHICK	R.ILDEEVFEGDIQQLLIVADPR.A	Y	30.93	2411.26	21	0.3	804.76	3	39.25		F20:769	1	176	196
Sample 2	9	260	Alpha 1 (V) collagen OS=Gallus gallus PE=2 SV=1	tr|Q9IAU4|Q9IAU4_CHICK	R.ILDEEVFEGDIQQLLIVADPR.A	Y	30.93	2411.26	21	0.3	804.76	3	39.25		F20:769	1	208	228
Sample 2	2	3	Serum albumin OS=Gallus gallus GN=ALB PE=1 SV=2	P19121|ALBU_CHICK	F.LYAPAILSFAVDFEHALQSC(+57.02)C(+57.02)K.E	Y	27.99	2539.22	22	1.2	847.416	3	40.19		F20:777	1	177	198	Carbamidomethylation	C20:Carbamidomethylation:1000.00;C21:Carbamidomethylation:1000.00
Sample 2	2	3	Serum albumin OS=Gallus gallus GN=ALB PE=1 SV=2	P19121|ALBU_CHICK	R.HPFLYAPAILSFAVDFEHALQSC(+57.02)C(+57.02)K.E	Y	35.74	2920.4	25	2	974.477	3	40.31		F20:779	2	174	198	Carbamidomethylation	C23:Carbamidomethylation:1000.00;C24:Carbamidomethylation:1000.00
Sample 2	20	19	Uncharacterized protein OS=Gallus gallus GN=SERPINF1 PE=3 SV=1	tr|E1C7H6|E1C7H6_CHICK	R.TATANVLLSPFSLATALSGLSLGAGER.T	Y	32.1	2616.41	27	1.8	873.146	3	41.04		F20:786	1	71	97
Sample 2	3	4	Collagen alpha-1(I) chain OS=Gallus gallus GN=COL1A1 PE=1 SV=3	P02457|CO1A1_CHICK	R.LPIIDLAPMD(+15.99)VGAPDQEFGIDIGPVC(+57.02)FL	Y	17.54	3027.5	28	1.5	1010.17	3	43.11		F20:805	1	1426	1453	Oxidation or Hydroxylation; Carbamidomethylation	D10:Oxidation or Hydroxylation:0.00;C26:Carbamidomethylation:1000.00
