# Supplementary material for: Bone protein “extractomics”: comparing the efficiency of bone protein extractions of Gallus gallus in tandem mass spectrometry, with an eye towards paleoproteomics
Source: PeerJ. 2016 Oct 27;4:e2603. doi: 10.7717/peerj.2603 (PMC5088622; doi:10.7717/peerj.2603)
Supplement: Table S9 [file peerj-04-2603-s013.xlsx]

## Sheet: Peptides
Table S9. Peptides identified in samples from Method 4, precipitated HCl (20 mL/g) (20-HCl-P) @ 1% FDR
Sample #	Protein Group	Protein ID	Protein Description	Protein Accession	Peptide	Unique	-10lgP	Mass	Length	ppm	m/z	z	RT	Area	Scan	#Spec	Start	End	PTM	AScore
Sample 1	4	4	Collagen alpha-1(I) chain OS=Gallus gallus GN=COL1A1 PE=1 SV=3	P02457|CO1A1_CHICK	R.DGAAGPKGDRGETGPAGP(+15.99)PGAP(+15.99)GAPGAP(+15.99)GPVGPAGK.N	Y	24.99	3092.49	36	1.3	774.131	4	12.95		F7:105	1	1016	1051	Oxidation or Hydroxylation	P18:Oxidation or Hydroxylation:6.69;P22:Oxidation or Hydroxylation:28.36;P28:Oxidation or Hydroxylation:14.04
Sample 1	4	4	Collagen alpha-1(I) chain OS=Gallus gallus GN=COL1A1 PE=1 SV=3	P02457|CO1A1_CHICK	R.GAP(+15.99)GPP(+15.99)GAVGAAGKDGEAGAQGPP(+15.99)GPTGPAGER.G	Y	45.3	2855.34	33	0.9	952.789	3	13.45		F7:113	2	588	620	Oxidation or Hydroxylation	P3:Oxidation or Hydroxylation:20.41;P6:Oxidation or Hydroxylation:11.06;P24:Oxidation or Hydroxylation:211.24
Sample 1	4	4	Collagen alpha-1(I) chain OS=Gallus gallus GN=COL1A1 PE=1 SV=3	P02457|CO1A1_CHICK	K.GDRGETGPAGP(+15.99)PGAPGAP(+15.99)GAP(+15.99)GPVGPAGK.N	Y	32.44	2496.2	29	0.9	833.074	3	13.48		F7:114	1	1023	1051	Oxidation or Hydroxylation	P11:Oxidation or Hydroxylation:29.32;P18:Oxidation or Hydroxylation:28.36;P21:Oxidation or Hydroxylation:71.27
Sample 1	28	43	Alpha-1 type XI collagen (Fragment) OS=Gallus gallus PE=2 SV=1	tr|Q90796|Q90796_CHICK	K.TGPVGPQGP(+15.99)AGKPGPEGLR.G	Y	27.67	1786.93	19	0.7	596.652	3	14.3		F7:133	1	474	492	Oxidation or Hydroxylation	P9:Oxidation or Hydroxylation:0.00
Sample 1	39	259	Uncharacterized protein (Fragment) OS=Gallus gallus GN=COL5A1 PE=4 SV=2	tr|F1NI79|F1NI79_CHICK	K.TGPIGPQGAPGK(+15.99)P(+15.99)GPDGLR.G	Y	30.23	1802.93	19	0.7	601.984	3	14.34		F7:134	1	1381	1399	Oxidation or Hydroxylation	K12:Oxidation or Hydroxylation:0.00;P13:Oxidation or Hydroxylation:6.59
Sample 1	5	2	Serum albumin OS=Gallus gallus GN=ALB PE=4 SV=2	tr|F2Z4L6|F2Z4L6_CHICK	K.LC(+57.02)SAPAEEREVGQMK.L	N	25.12	1703.8	15	1	568.94	3	14.75		F7:144	1	491	505	Carbamidomethylation	C2:Carbamidomethylation:1000.00
Sample 1	6	3	Serum albumin OS=Gallus gallus GN=ALB PE=1 SV=2	P19121|ALBU_CHICK	K.LC(+57.02)SAPAEEREVGQMK.L	N	25.12	1703.8	15	1	568.94	3	14.75		F7:144	1	541	555	Carbamidomethylation	C2:Carbamidomethylation:1000.00
Sample 1	4	4	Collagen alpha-1(I) chain OS=Gallus gallus GN=COL1A1 PE=1 SV=3	P02457|CO1A1_CHICK	R.GEP(+15.99)GPAGLP(+15.99)GPAGER.G	Y	39.47	1392.66	15	-0.5	697.339	2	14.78		F7:145	1	462	476	Oxidation or Hydroxylation	P3:Oxidation or Hydroxylation:20.41;P9:Oxidation or Hydroxylation:22.85
Sample 1	23	50	Lysozyme OS=Gallus gallus GN=LYZ PE=3 SV=1	tr|B8YK79|B8YK79_CHICK	K.FESNFNTQATNR.N	Y	44.88	1427.64	12	0.7	714.829	2	15.64		F7:168	1	52	63
Sample 1	23	51	Lysozyme C OS=Gallus gallus GN=LYZ PE=1 SV=1	P00698|LYSC_CHICK	K.FESNFNTQATNR.N	Y	44.88	1427.64	12	0.7	714.829	2	15.64		F7:168	1	52	63
Sample 1	1	1	Collagen alpha-2(I) chain OS=Gallus gallus GN=COL1A2 PE=4 SV=1	tr|F1P0H9|F1P0H9_CHICK	R.VGP(+15.99)P(+15.99)GPAGITGPP(+15.99)GPP(+15.99)GPAGK.D	Y	25.08	1840.93	21	1.5	921.475	2	15.89		F7:175	5	794	814	Oxidation or Hydroxylation	P3:Oxidation or Hydroxylation:19.27;P4:Oxidation or Hydroxylation:17.01;P13:Oxidation or Hydroxylation:24.44;P16:Oxidation or Hydroxylation:7.32
Sample 1	3	6	Apolipoprotein A-I OS=Gallus gallus GN=APOA1 PE=1 SV=2	P08250|APOA1_CHICK	K.VM(+15.99)EQLSNLR.E	Y	34.37	1104.56	9	0.8	553.288	2	15.92		F7:176	1	219	227	Oxidation (M)	M2:Oxidation (M):1000.00
Sample 1	3	6	Apolipoprotein A-I OS=Gallus gallus GN=APOA1 PE=1 SV=2	P08250|APOA1_CHICK	R.AELTKDLEEVKEK.I	Y	42.76	1530.81	13	0.9	766.415	2	15.95		F7:177	2	107	119
Sample 1	1	1	Collagen alpha-2(I) chain OS=Gallus gallus GN=COL1A2 PE=4 SV=1	tr|F1P0H9|F1P0H9_CHICK	R.GLP(+15.99)GAIGAP(+15.99)GPAGGAGDRGEGGPAGPAGPAGAR.G	Y	37.47	2724.33	33	1.1	909.119	3	16.16		F7:184	4	675	707	Oxidation or Hydroxylation	P3:Oxidation or Hydroxylation:131.72;P9:Oxidation or Hydroxylation:26.31
Sample 1	4	4	Collagen alpha-1(I) chain OS=Gallus gallus GN=COL1A1 PE=1 SV=3	P02457|CO1A1_CHICK	R.GFP(+15.99)GADGIAGPKGPPGER(+15.99).G	Y	17.7	1710.83	18	0.7	571.285	3	16.24		F7:187	1	483	500	Oxidation or Hydroxylation	P3:Oxidation or Hydroxylation:17.01;R18:Oxidation or Hydroxylation:12.42
Sample 1	1	1	Collagen alpha-2(I) chain OS=Gallus gallus GN=COL1A2 PE=4 SV=1	tr|F1P0H9|F1P0H9_CHICK	R.VGN(sub P)P(+15.99)GPAGITGPP(+15.99)GPP(+15.99)GPAGK.D	Y	14.57	1841.93	21	4.9	921.975	2	16.35		F7:191	1	794	814	Oxidation or Hydroxylation; Mutation	P4:Oxidation or Hydroxylation:11.06;P13:Oxidation or Hydroxylation:11.06;P16:Oxidation or Hydroxylation:8.22
Sample 1	4	4	Collagen alpha-1(I) chain OS=Gallus gallus GN=COL1A1 PE=1 SV=3	P02457|CO1A1_CHICK	K.GSPGAD(+15.99)GPIGAP(+15.99)GTP(+15.99)GPQGIAGQR.G	Y	34.3	2162.04	24	1.3	1082.03	2	16.73		F7:202	2	924	947	Oxidation or Hydroxylation	D6:Oxidation or Hydroxylation:0.00;P12:Oxidation or Hydroxylation:48.12;P15:Oxidation or Hydroxylation:18.53
Sample 1	4	4	Collagen alpha-1(I) chain OS=Gallus gallus GN=COL1A1 PE=1 SV=3	P02457|CO1A1_CHICK	K.GSP(+15.99)GADGPIGAP(+15.99)GTP(+15.99)GPQGIAGQR.G	Y	34.32	2162.04	24	0.8	721.686	3	16.78		F7:204	1	924	947	Oxidation or Hydroxylation	P3:Oxidation or Hydroxylation:14.84;P12:Oxidation or Hydroxylation:41.96;P15:Oxidation or Hydroxylation:18.53
Sample 1	1	1	Collagen alpha-2(I) chain OS=Gallus gallus GN=COL1A2 PE=4 SV=1	tr|F1P0H9|F1P0H9_CHICK	K.EGPVGFP(+15.99)GADGR.V	Y	43.32	1173.54	12	0.3	587.778	2	16.84		F7:206	3	464	475	Oxidation or Hydroxylation	P7:Oxidation or Hydroxylation:11.06
Sample 1	1	1	Collagen alpha-2(I) chain OS=Gallus gallus GN=COL1A2 PE=4 SV=1	tr|F1P0H9|F1P0H9_CHICK	R.GEP(+15.99)GNIGFPGPK(+15.99).G	Y	28.84	1200.58	12	0.6	601.296	2	16.86		F7:207	1	486	497	Oxidation or Hydroxylation	P3:Oxidation or Hydroxylation:22.85;K12:Oxidation or Hydroxylation:0.00
Sample 1	1	1	Collagen alpha-2(I) chain OS=Gallus gallus GN=COL1A2 PE=4 SV=1	tr|F1P0H9|F1P0H9_CHICK	K.GEIGPAGNVGP(+31.99)TGPAGPR.G	Y	27.83	1634.8	18	-0.8	818.407	2	16.94		F7:209	1	264	281	Dihydroxy	P11:Dihydroxy:13.16
Sample 1	1	1	Collagen alpha-2(I) chain OS=Gallus gallus GN=COL1A2 PE=4 SV=1	tr|F1P0H9|F1P0H9_CHICK	R.GLHGEFGVP(+15.99)GPAGPR.G	Y	45.46	1462.73	15	0.9	732.374	2	17.04		F7:212	3	573	587	Oxidation or Hydroxylation	P9:Oxidation or Hydroxylation:39.76
Sample 1	3	6	Apolipoprotein A-I OS=Gallus gallus GN=APOA1 PE=1 SV=2	P08250|APOA1_CHICK	R.LTPYAENLK.N	Y	24.65	1047.56	9	0.3	524.788	2	17.12		F7:215	1	241	249
Sample 1	4	4	Collagen alpha-1(I) chain OS=Gallus gallus GN=COL1A1 PE=1 SV=3	P02457|CO1A1_CHICK	R.GLTGPIGPPGPAGAPGD(+21.98)K(+42.01)GEAGPPGPAGPTGAR.G	Y	19.76	2894.43	33	-4.5	965.812	3	17.15		F7:216	1	753	785	Sodium adduct; Acetylation (K)	D17:Sodium adduct:0.00;K18:Acetylation (K):1000.00
Sample 1	4	4	Collagen alpha-1(I) chain OS=Gallus gallus GN=COL1A1 PE=1 SV=3	P02457|CO1A1_CHICK	R.GLTGPIGPP(+15.99)GPAGAP(+15.99)GDKGEAGPP(+15.99)GPAGPTGAR.G	Y	47.77	2878.42	33	2	960.483	3	17.28		F7:220	1	753	785	Oxidation or Hydroxylation	P9:Oxidation or Hydroxylation:59.30;P15:Oxidation or Hydroxylation:88.25;P24:Oxidation or Hydroxylation:90.97
Sample 1	4	4	Collagen alpha-1(I) chain OS=Gallus gallus GN=COL1A1 PE=1 SV=3	P02457|CO1A1_CHICK	R.GLTGPIGPPGP(+15.99)AGAPGD(+15.99)KGEAGPP(+15.99)GPAGPTGAR.G	Y	17.89	2878.42	33	0.7	720.613	4	17.47		F7:226	1	753	785	Oxidation or Hydroxylation	P11:Oxidation or Hydroxylation:0.00;D17:Oxidation or Hydroxylation:0.00;P24:Oxidation or Hydroxylation:17.01
Sample 1	5	2	Serum albumin OS=Gallus gallus GN=ALB PE=4 SV=2	tr|F2Z4L6|F2Z4L6_CHICK	K.LVKDVVDLAQK.C	N	42.26	1226.72	11	0.9	614.37	2	17.85		F7:239	2	19	29
Sample 1	6	3	Serum albumin OS=Gallus gallus GN=ALB PE=1 SV=2	P19121|ALBU_CHICK	K.LVKDVVDLAQK.C	N	42.26	1226.72	11	0.9	614.37	2	17.85		F7:239	2	69	79
Sample 1	1	1	Collagen alpha-2(I) chain OS=Gallus gallus GN=COL1A2 PE=4 SV=1	tr|F1P0H9|F1P0H9_CHICK	R.GLP(+15.99)GESGAVGPAGP(+15.99)IGSR(+15.99).G	Y	35.08	1625.8	18	-0.3	813.908	2	18.22		F7:252	1	591	608	Oxidation or Hydroxylation	P3:Oxidation or Hydroxylation:63.64;P14:Oxidation or Hydroxylation:16.66;R18:Oxidation or Hydroxylation:8.01
Sample 1	1	1	Collagen alpha-2(I) chain OS=Gallus gallus GN=COL1A2 PE=4 SV=1	tr|F1P0H9|F1P0H9_CHICK	R.GDAGPP(+15.99)GMTGFPGAAGR(+15.99).V	Y	44.49	1546.68	17	0.9	774.35	2	18.34		F7:256	1	777	793	Oxidation or Hydroxylation	P6:Oxidation or Hydroxylation:14.02;R17:Oxidation or Hydroxylation:0.00
Sample 1	1	1	Collagen alpha-2(I) chain OS=Gallus gallus GN=COL1A2 PE=4 SV=1	tr|F1P0H9|F1P0H9_CHICK	R.VGPIGPAGNRGEPGN(+15.99)IGFPGPK(+15.99).G	Y	32.27	2119.08	22	0.9	707.368	3	18.91		F7:274	2	476	497	Oxidation or Hydroxylation	N15:Oxidation or Hydroxylation:0.00;K22:Oxidation or Hydroxylation:0.00
Sample 1	4	4	Collagen alpha-1(I) chain OS=Gallus gallus GN=COL1A1 PE=1 SV=3	P02457|CO1A1_CHICK	R.GFSGLQGPP(+15.99)GPP(+15.99)GAP(+15.99)GEQGPSGASGPAGPR.G	Y	46.26	2688.25	30	1.8	897.093	3	18.93		F7:275	7	1101	1130	Oxidation or Hydroxylation	P9:Oxidation or Hydroxylation:56.54;P12:Oxidation or Hydroxylation:58.70;P15:Oxidation or Hydroxylation:64.58
Sample 1	1	1	Collagen alpha-2(I) chain OS=Gallus gallus GN=COL1A2 PE=4 SV=1	tr|F1P0H9|F1P0H9_CHICK	R.VGPIGPAGNRGEP(+15.99)GNIGFP(+15.99)GPK.G	Y	33.16	2119.08	22	0.9	1060.55	2	19.02		F7:278	1	476	497	Oxidation or Hydroxylation	P13:Oxidation or Hydroxylation:8.22;P19:Oxidation or Hydroxylation:0.00
Sample 1	4	4	Collagen alpha-1(I) chain OS=Gallus gallus GN=COL1A1 PE=1 SV=3	P02457|CO1A1_CHICK	R.GQAGVM(+15.99)GFP(+15.99)GPK.G	Y	36.16	1176.56	12	0.5	589.287	2	19.29		F7:287	1	564	575	Oxidation (M); Oxidation or Hydroxylation	M6:Oxidation (M):1000.00;P9:Oxidation or Hydroxylation:4.64
Sample 1	3	6	Apolipoprotein A-I OS=Gallus gallus GN=APOA1 PE=1 SV=2	P08250|APOA1_CHICK	K.VMEQLSNLR.E	Y	31.74	1088.56	9	0.9	545.29	2	19.34		F7:289	1	219	227
Sample 1	3	6	Apolipoprotein A-I OS=Gallus gallus GN=APOA1 PE=1 SV=2	P08250|APOA1_CHICK	K.NLAPYSDELR.Q	Y	33.46	1176.58	10	-0.4	589.296	2	19.47		F7:293	2	185	194
Sample 1	1	1	Collagen alpha-2(I) chain OS=Gallus gallus GN=COL1A2 PE=4 SV=1	tr|F1P0H9|F1P0H9_CHICK	K.GPKGETGPTGAIGPIGASGP(+15.99)PGPVGAAGPAGPR.G	Y	18.03	2820.45	33	1.2	941.159	3	19.62		F7:298	1	744	776	Oxidation or Hydroxylation	P20:Oxidation or Hydroxylation:10.11
Sample 1	7	8	SPARC OS=Gallus gallus GN=SPARC PE=4 SV=1	tr|F1P291|F1P291_CHICK	R.LEAGDHTVELLAR.D	N	39.45	1422.75	13	1.3	712.381	2	19.65		F7:299	3	201	213
Sample 1	8	9	SPARC OS=Gallus gallus GN=SPARC PE=2 SV=1	P36377|SPRC_CHICK	R.LEAGDHTVELLAR.D	N	39.45	1422.75	13	1.3	712.381	2	19.65		F7:299	3	201	213
Sample 1	2	7	Uncharacterized protein OS=Gallus gallus GN=AHSG PE=4 SV=1	tr|E1BZE1|E1BZE1_CHICK	A.AEVAQHDKVPHPVGFVPPPPLC(+57.02)PGK.I	Y	32.39	2672.39	25	-0.1	891.804	3	19.91		F7:308	1	314	338	Carbamidomethylation	C22:Carbamidomethylation:1000.00
Sample 1	21	20	Vitronectin OS=Gallus gallus PE=2 SV=1	tr|O12945|O12945_CHICK	R.GVPNQLDAAMAGR.I	Y	39.53	1298.64	13	-0.2	650.327	2	20.38		F7:324	1	338	350
Sample 1	21	21	Uncharacterized protein OS=Gallus gallus GN=VTN PE=4 SV=2	tr|E1C7A7|E1C7A7_CHICK	R.GVPNQLDAAMAGR.I	Y	39.53	1298.64	13	-0.2	650.327	2	20.38		F7:324	1	338	350
Sample 1	16	28	Histone H2A-III OS=Gallus gallus PE=1 SV=2	P35062|H2A3_CHICK	R.NDEELNKLLGK.V	Y	15.65	1271.67	11	0.8	636.844	2	21.25		F7:353	1	90	100
Sample 1	16	29	Histone H2A-IV OS=Gallus gallus PE=1 SV=2	P02263|H2A4_CHICK	R.NDEELNKLLGK.V	Y	15.65	1271.67	11	0.8	636.844	2	21.25		F7:353	1	90	100
Sample 1	16	30	Histone H2A OS=Gallus gallus GN=H2A-VI PE=3 SV=2	tr|Q92069|Q92069_CHICK	R.NDEELNKLLGK.V	Y	15.65	1271.67	11	0.8	636.844	2	21.25		F7:353	1	90	100
Sample 1	16	31	Histone H2A.J OS=Gallus gallus GN=H2A-IX PE=3 SV=1	P70082|H2AJ_CHICK	R.NDEELNKLLGK.V	Y	15.65	1271.67	11	0.8	636.844	2	21.25		F7:353	1	90	100
Sample 1	1	1	Collagen alpha-2(I) chain OS=Gallus gallus GN=COL1A2 PE=4 SV=1	tr|F1P0H9|F1P0H9_CHICK	K.GETGPTGAIGPIGASGP(+15.99)PGPVGAAGPAGPR.G	Y	31.15	2538.28	30	0.6	847.102	3	21.46		F7:360	1	747	776	Oxidation or Hydroxylation	P17:Oxidation or Hydroxylation:0.00
Sample 1	5	2	Serum albumin OS=Gallus gallus GN=ALB PE=4 SV=2	tr|F2Z4L6|F2Z4L6_CHICK	R.MMSNLC(+57.02)SQQDVFSGK.I	N	48.96	1730.74	15	1.2	866.38	2	21.5		F7:361	2	238	252	Carbamidomethylation	C6:Carbamidomethylation:1000.00
Sample 1	6	3	Serum albumin OS=Gallus gallus GN=ALB PE=1 SV=2	P19121|ALBU_CHICK	R.MMSNLC(+57.02)SQQDVFSGK.I	N	48.96	1730.74	15	1.2	866.38	2	21.5		F7:361	2	288	302	Carbamidomethylation	C6:Carbamidomethylation:1000.00
Sample 1	1	1	Collagen alpha-2(I) chain OS=Gallus gallus GN=COL1A2 PE=4 SV=1	tr|F1P0H9|F1P0H9_CHICK	K.GETGPTGAIGPIGASGPP(+15.99)GPVGAAGPAGPR.G	Y	51.12	2538.28	30	0.6	1270.15	2	21.54		F7:362	2	747	776	Oxidation or Hydroxylation	P18:Oxidation or Hydroxylation:128.65
Sample 1	16	28	Histone H2A-III OS=Gallus gallus PE=1 SV=2	P35062|H2A3_CHICK	R.AGLQFPVGR.V	Y	36.46	943.524	9	0.9	472.77	2	22.15		F7:378	3	22	30
Sample 1	16	29	Histone H2A-IV OS=Gallus gallus PE=1 SV=2	P02263|H2A4_CHICK	R.AGLQFPVGR.V	Y	36.46	943.524	9	0.9	472.77	2	22.15		F7:378	3	22	30
Sample 1	16	30	Histone H2A OS=Gallus gallus GN=H2A-VI PE=3 SV=2	tr|Q92069|Q92069_CHICK	R.AGLQFPVGR.V	Y	36.46	943.524	9	0.9	472.77	2	22.15		F7:378	3	22	30
Sample 1	16	31	Histone H2A.J OS=Gallus gallus GN=H2A-IX PE=3 SV=1	P70082|H2AJ_CHICK	R.AGLQFPVGR.V	Y	36.46	943.524	9	0.9	472.77	2	22.15		F7:378	3	22	30
Sample 1	16	32	Histone H2A (Fragment) OS=Gallus gallus GN=LOC101751709 PE=3 SV=1	tr|R4GJP9|R4GJP9_CHICK	R.AGLQFPVGR.V	Y	36.46	943.524	9	0.9	472.77	2	22.15		F7:378	3	22	30
Sample 1	16	33	Histone H2A OS=Gallus gallus GN=H2AFX PE=3 SV=1	tr|R4GJN7|R4GJN7_CHICK	R.AGLQFPVGR.V	Y	36.46	943.524	9	0.9	472.77	2	22.15		F7:378	3	22	30
Sample 1	9	25	Matrix Gla protein OS=Gallus gallus GN=MGP PE=2 SV=1	O42413|MGP_CHICK	R.AN(-17.03)GFIRDDTGLR.A	Y	31.82	1316.65	12	1	659.332	2	22.17		F7:379	2	41	52	Ammonia-loss (N)	N2:Ammonia-loss (N):1000.00
Sample 1	3	6	Apolipoprotein A-I OS=Gallus gallus GN=APOA1 PE=1 SV=2	P08250|APOA1_CHICK	R.IRDM(+15.99)VDVYLETVK.A	Y	43.59	1595.82	13	0.7	798.919	2	22.27		F7:382	6	34	46	Oxidation (M)	M4:Oxidation (M):1000.00
Sample 1	1	1	Collagen alpha-2(I) chain OS=Gallus gallus GN=COL1A2 PE=4 SV=1	tr|F1P0H9|F1P0H9_CHICK	D.PGPVGPVGPAGAFGPR.G	Y	30.03	1431.76	16	1	716.889	2	22.43		F7:388	1	980	995
Sample 1	35	85	Uncharacterized protein OS=Gallus gallus GN=COL4A6 PE=4 SV=2	tr|F1P3T8|F1P3T8_CHICK	R.GDVGPPGLPVLGAQEQ(+.98)A.L	Y	23.87	1604.8	17	6.8	803.415	2	22.62		F7:394	2	957	973	Deamidation (NQ)	Q16:Deamidation (NQ):5.99
Sample 1	1	1	Collagen alpha-2(I) chain OS=Gallus gallus GN=COL1A2 PE=4 SV=1	tr|F1P0H9|F1P0H9_CHICK	R.GDPGPVGP(+15.99)VGPAGAFGPR.G	Y	32.57	1619.81	18	-0.2	810.91	2	22.64		F7:395	1	978	995	Oxidation or Hydroxylation	P8:Oxidation or Hydroxylation:0.00
Sample 1	1	1	Collagen alpha-2(I) chain OS=Gallus gallus GN=COL1A2 PE=4 SV=1	tr|F1P0H9|F1P0H9_CHICK	R.GLP(+15.99)GIAGATGEP(+15.99)GPLGVSGPPGAR(+15.99).G	Y	46.28	2132.09	24	0.8	1067.05	2	22.72		F7:397	4	882	905	Oxidation or Hydroxylation	P3:Oxidation or Hydroxylation:195.68;P12:Oxidation or Hydroxylation:33.18;R24:Oxidation or Hydroxylation:0.00
Sample 1	1	1	Collagen alpha-2(I) chain OS=Gallus gallus GN=COL1A2 PE=4 SV=1	tr|F1P0H9|F1P0H9_CHICK	K.AADFGPGPMGLM(+15.99)GPR.G	Y	46.65	1488.69	15	0.4	745.35	2	23.03		F7:407	3	84	98	Oxidation (M)	M12:Oxidation (M):56.34
Sample 1	9	25	Matrix Gla protein OS=Gallus gallus GN=MGP PE=2 SV=1	O42413|MGP_CHICK	R.AN(+.98)GFIRDDTGL.R	Y	34.47	1178.56	11	0.7	590.286	2	23.1		F7:409	4	41	51	Deamidation (NQ)	N2:Deamidation (NQ):1000.00
Sample 1	1	1	Collagen alpha-2(I) chain OS=Gallus gallus GN=COL1A2 PE=4 SV=1	tr|F1P0H9|F1P0H9_CHICK	R.GLP(+15.99)GIAGATGEP(+15.99)GPLGVSGPP(+15.99)GAR.G	Y	34.98	2132.09	24	0.7	711.703	3	23.12		F7:410	1	882	905	Oxidation or Hydroxylation	P3:Oxidation or Hydroxylation:81.94;P12:Oxidation or Hydroxylation:5.03;P21:Oxidation or Hydroxylation:0.00
Sample 1	5	2	Serum albumin OS=Gallus gallus GN=ALB PE=4 SV=2	tr|F2Z4L6|F2Z4L6_CHICK	K.KMPQVPTDLLLETGKK.M	N	33.93	1797.01	16	0.1	600.01	3	23.18		F7:412	2	392	407
Sample 1	6	3	Serum albumin OS=Gallus gallus GN=ALB PE=1 SV=2	P19121|ALBU_CHICK	K.KMPQVPTDLLLETGKK.M	N	33.93	1797.01	16	0.1	600.01	3	23.18		F7:412	2	442	457
Sample 1	9	25	Matrix Gla protein OS=Gallus gallus GN=MGP PE=2 SV=1	O42413|MGP_CHICK	M.ESHEYLNPFLNR.Q	Y	45.04	1517.73	12	0.5	759.871	2	23.48		F7:421	2	27	38
Sample 1	2	7	Uncharacterized protein OS=Gallus gallus GN=AHSG PE=4 SV=1	tr|E1BZE1|E1BZE1_CHICK	K.ISHNNPVASESSSSEFPSLLSAK.S	Y	37.59	2387.16	23	0.9	796.728	3	23.55		F7:423	2	284	306
Sample 1	3	6	Apolipoprotein A-I OS=Gallus gallus GN=APOA1 PE=1 SV=2	P08250|APOA1_CHICK	K.DAIAQFESSAVGK.Q	Y	43.63	1321.65	13	0.8	661.833	2	23.67		F7:427	2	51	63
Sample 1	3	6	Apolipoprotein A-I OS=Gallus gallus GN=APOA1 PE=1 SV=2	P08250|APOA1_CHICK	K.IRPFLDQFSAK.W	Y	44.26	1320.72	11	0.8	441.247	3	23.78		F7:431	6	120	130
Sample 1	14	12	Uncharacterized protein OS=Gallus gallus GN=LCN8 PE=3 SV=2	tr|E1C0K1|E1C0K1_CHICK	K.SYAVIFATR.V	Y	35.96	1026.55	9	0.2	514.282	2	23.81		F7:432	1	115	123
Sample 1	14	14	Extracellular fatty acid-binding protein OS=Gallus gallus GN=EXFABP PE=1 SV=2	P21760|EXFAB_CHICK	K.SYAVIFATR.V	Y	35.96	1026.55	9	0.2	514.282	2	23.81		F7:432	1	115	123
Sample 1	13	39	Histone H2B 8 OS=Gallus gallus GN=H2B-VIII PE=1 SV=3	Q9PSW9|H2B8_CHICK	R.LLLPGELAK.H	Y	15.72	952.596	9	0.2	477.305	2	24.07		F7:441	4	101	109
Sample 1	13	40	Histone H2B 5 OS=Gallus gallus GN=H2B-V PE=1 SV=2	P0C1H4|H2B5_CHICK	R.LLLPGELAK.H	Y	15.72	952.596	9	0.2	477.305	2	24.07		F7:441	4	101	109
Sample 1	13	41	Histone H2B 1/2/3/4/6 OS=Gallus gallus GN=H2B-I PE=1 SV=2	P0C1H3|H2B1_CHICK	R.LLLPGELAK.H	Y	15.72	952.596	9	0.2	477.305	2	24.07		F7:441	4	101	109
Sample 1	13	42	Histone H2B (Fragment) OS=Gallus gallus GN=HIST1H2B5L PE=3 SV=1	tr|A0A0A0MQ64|A0A0A0MQ64_CHICK	R.LLLPGELAK.H	Y	15.72	952.596	9	0.2	477.305	2	24.07		F7:441	4	118	126
Sample 1	10	13	Uncharacterized protein OS=Gallus gallus GN=DMP1 PE=4 SV=2	tr|F1NUV7|F1NUV7_CHICK	G.DDPSVF(+15.99)DSLGGR.H	Y	30.99	1279.57	12	0.6	640.792	2	24.13		F7:443	1	171	182	Oxidation or Hydroxylation	F6:Oxidation or Hydroxylation:17.32
Sample 1	2	7	Uncharacterized protein OS=Gallus gallus GN=AHSG PE=4 SV=1	tr|E1BZE1|E1BZE1_CHICK	K.MVTEPSQD(+15.99)LIAEC(+57.02)QLYGHQPGVTYPHPGQDTSAGLVPSAGQGFTNHNLK.I	Y	24.89	5262.48	49	1	878.088	6	24.3		F7:449	1	235	283	Oxidation or Hydroxylation; Carbamidomethylation	D8:Oxidation or Hydroxylation:0.00;C13:Carbamidomethylation:1000.00
Sample 1	25	38	Gremlin-1 OS=Gallus gallus GN=GREM1 PE=2 SV=1	O73755|GREM1_CHICK	K.KFTTMTVTLNC(+57.02)PELQPPR.K	Y	37.46	2132.08	18	1.4	711.7	3	24.33		F7:450	1	148	165	Carbamidomethylation	C11:Carbamidomethylation:1000.00
Sample 1	7	8	SPARC OS=Gallus gallus GN=SPARC PE=4 SV=1	tr|F1P291|F1P291_CHICK	K.EQDIDKDLVI	N	27.77	1186.61	10	1	594.312	2	24.61		F7:459	4	289	298
Sample 1	8	9	SPARC OS=Gallus gallus GN=SPARC PE=2 SV=1	P36377|SPRC_CHICK	K.EQDIDKDLVI	N	27.77	1186.61	10	1	594.312	2	24.61		F7:459	4	289	298
Sample 1	2	7	Uncharacterized protein OS=Gallus gallus GN=AHSG PE=4 SV=1	tr|E1BZE1|E1BZE1_CHICK	K.MVTEPSQDLIAEC(+57.02)QLYGHQPGVTYPHPGQDTSAGLVPSAGQGFTN(+.98)HNLK.I	Y	18.05	5247.47	49	2	1312.88	4	24.9		F7:469	1	235	283	Carbamidomethylation; Deamidation (NQ)	C13:Carbamidomethylation:1000.00;N45:Deamidation (NQ):24.41
Sample 1	27	76	Gallinacin-7 (Fragment) OS=Gallus gallus PE=4 SV=1	tr|E1AFV0|E1AFV0_CHICK	G.Q(-17.03)PFIPRPIDTC(+57.02)R.L	Y	28.51	1481.74	12	1.2	741.881	2	25.02		F7:472	2	15	26	Pyro-glu from Q; Carbamidomethylation	Q1:Pyro-glu from Q:1000.00;C11:Carbamidomethylation:1000.00
Sample 1	27	77	Gallinacin-7 OS=Gallus gallus GN=GAL7 PE=2 SV=1	Q6QLR2|GLL7_CHICK	G.Q(-17.03)PFIPRPIDTC(+57.02)R.L	Y	28.51	1481.74	12	1.2	741.881	2	25.02		F7:472	2	21	32	Pyro-glu from Q; Carbamidomethylation	Q1:Pyro-glu from Q:1000.00;C11:Carbamidomethylation:1000.00
Sample 1	5	2	Serum albumin OS=Gallus gallus GN=ALB PE=4 SV=2	tr|F2Z4L6|F2Z4L6_CHICK	K.TIADGFTAMVDK.C	N	48.03	1267.61	12	0.7	634.814	2	25.05		F7:473	1	524	535
Sample 1	6	3	Serum albumin OS=Gallus gallus GN=ALB PE=1 SV=2	P19121|ALBU_CHICK	K.TIADGFTAMVDK.C	N	48.03	1267.61	12	0.7	634.814	2	25.05		F7:473	1	574	585
Sample 1	20	35	Lumican OS=Gallus gallus GN=LUM PE=1 SV=1	P51890|LUM_CHICK	R.ADLPQEMYNC(+57.02)LR.V	Y	39.06	1508.68	12	1.1	755.346	2	25.65		F7:492	2	324	335	Carbamidomethylation	C10:Carbamidomethylation:1000.00
Sample 1	3	6	Apolipoprotein A-I OS=Gallus gallus GN=APOA1 PE=1 SV=2	P08250|APOA1_CHICK	K.DTEALRAELTKDLEEVKEK.I	Y	31.07	2216.15	19	0.6	555.046	4	25.98		F7:501	2	101	119
Sample 1	10	13	Uncharacterized protein OS=Gallus gallus GN=DMP1 PE=4 SV=2	tr|F1NUV7|F1NUV7_CHICK	G.DVANALGPLLGDEDHGR.L	Y	37.21	1747.85	17	0.6	583.624	3	26.31		F7:510	5	36	52
Sample 1	2	7	Uncharacterized protein OS=Gallus gallus GN=AHSG PE=4 SV=1	tr|E1BZE1|E1BZE1_CHICK	K.VN(-17.03)GQFSVLASK.C	Y	24.8	1131.59	11	0.9	566.804	2	26.38		F7:512	1	118	128	Ammonia-loss (N)	N2:Ammonia-loss (N):1000.00
Sample 1	2	7	Uncharacterized protein OS=Gallus gallus GN=AHSG PE=4 SV=1	tr|E1BZE1|E1BZE1_CHICK	K.DNLAAC(+57.02)QLLPEDQSNFGFCTAK(+57.02).M	Y	26.21	2498.12	22	0.6	833.715	3	28.25		F7:558	1	213	234	Carbamidomethylation; Carbamidomethylation (DHKE X@N-term)	C6:Carbamidomethylation:1000.00;K22:Carbamidomethylation (DHKE X@N-term):30.96
Sample 1	14	12	Uncharacterized protein OS=Gallus gallus GN=LCN8 PE=3 SV=2	tr|E1C0K1|E1C0K1_CHICK	R.ISFLGEDELEVSYAAPSPK.G	Y	37.1	2051.01	19	1	1026.51	2	28.86		F7:575	2	60	78
Sample 1	14	14	Extracellular fatty acid-binding protein OS=Gallus gallus GN=EXFABP PE=1 SV=2	P21760|EXFAB_CHICK	R.ISFLGEDELEVSYAAPSPK.G	Y	37.1	2051.01	19	1	1026.51	2	28.86		F7:575	2	60	78
Sample 1	3	6	Apolipoprotein A-I OS=Gallus gallus GN=APOA1 PE=1 SV=2	P08250|APOA1_CHICK	R.LISFLDELQK.S	Y	40.33	1204.67	10	0.7	603.343	2	30.1		F7:598	3	252	261
Sample 1	3	6	Apolipoprotein A-I OS=Gallus gallus GN=APOA1 PE=1 SV=2	P08250|APOA1_CHICK	R.LISF(+31.99)LDELQK.S	Y	28.9	1236.66	10	0.3	619.337	2	30.15		F7:600	1	252	261	Dihydroxy	F4:Dihydroxy:39.55
Sample 1	3	6	Apolipoprotein A-I OS=Gallus gallus GN=APOA1 PE=1 SV=2	P08250|APOA1_CHICK	R.LISF(+15.99)LDELQK.S	Y	34	1220.67	10	1.5	611.341	2	30.23		F7:602	1	252	261	Oxidation or Hydroxylation	F4:Oxidation or Hydroxylation:67.96
Sample 1	37	624	Metalloendopeptidase (Fragment) OS=Gallus gallus GN=BMP1 PE=2 SV=1	tr|O57658|O57658_CHICK	K.AAAFLGDIALDEDDLR.H	Y	48.36	1703.84	16	1.6	852.927	2	30.33		F7:604	1	45	60
Sample 1	5	2	Serum albumin OS=Gallus gallus GN=ALB PE=4 SV=2	tr|F2Z4L6|F2Z4L6_CHICK	K.SFEAGHDAFMAEFVYEYSR.R	N	36.77	2254.96	19	0.6	752.662	3	30.5		F7:608	1	296	314
Sample 1	6	3	Serum albumin OS=Gallus gallus GN=ALB PE=1 SV=2	P19121|ALBU_CHICK	K.SFEAGHDAFMAEFVYEYSR.R	N	36.77	2254.96	19	0.6	752.662	3	30.5		F7:608	1	346	364
Sample 1	3	6	Apolipoprotein A-I OS=Gallus gallus GN=APOA1 PE=1 SV=2	P08250|APOA1_CHICK	R.EM(+15.99)WLKDTEALRAELTKDLEEVKEK.I	Y	38.55	2919.49	24	0.3	584.905	5	30.53		F7:609	1	96	119	Oxidation (M)	M2:Oxidation (M):1000.00
Sample 1	6	3	Serum albumin OS=Gallus gallus GN=ALB PE=1 SV=2	P19121|ALBU_CHICK	K.AVAMITFAQYLQR.C	Y	47.87	1510.8	13	1.3	756.407	2	31.59		F7:627	1	48	60
Sample 1	18	17	Osteopontin OS=Gallus gallus GN=SPP1 PE=2 SV=3	P23498|OSTP_CHICK	R.KLIEDDATAEVGDS(+79.97)QLAGLWLPK.E	Y	23.24	2548.25	23	0.8	850.423	3	31.66		F7:629	1	164	186	Phosphorylation (STY)	S14:Phosphorylation (STY):0.00
Sample 1	18	18	Osteopontin OS=Gallus gallus GN=SPP1 PE=4 SV=1	tr|F1NSM8|F1NSM8_CHICK	R.KLIEDDATAEVGDS(+79.97)QLAGLWLPK.E	Y	23.24	2548.25	23	0.8	850.423	3	31.66		F7:629	1	164	186	Phosphorylation (STY)	S14:Phosphorylation (STY):0.00
Sample 1	13	39	Histone H2B 8 OS=Gallus gallus GN=H2B-VIII PE=1 SV=3	Q9PSW9|H2B8_CHICK	K.AMGIM(+15.99)NSFVNDIFER.I	Y	47.62	1758.81	15	1.3	880.412	2	31.72		F7:630	1	59	73	Oxidation (M)	M5:Oxidation (M):44.44
Sample 1	13	40	Histone H2B 5 OS=Gallus gallus GN=H2B-V PE=1 SV=2	P0C1H4|H2B5_CHICK	K.AMGIM(+15.99)NSFVNDIFER.I	Y	47.62	1758.81	15	1.3	880.412	2	31.72		F7:630	1	59	73	Oxidation (M)	M5:Oxidation (M):44.44
Sample 1	13	41	Histone H2B 1/2/3/4/6 OS=Gallus gallus GN=H2B-I PE=1 SV=2	P0C1H3|H2B1_CHICK	K.AMGIM(+15.99)NSFVNDIFER.I	Y	47.62	1758.81	15	1.3	880.412	2	31.72		F7:630	1	59	73	Oxidation (M)	M5:Oxidation (M):44.44
Sample 1	13	42	Histone H2B (Fragment) OS=Gallus gallus GN=HIST1H2B5L PE=3 SV=1	tr|A0A0A0MQ64|A0A0A0MQ64_CHICK	K.AMGIM(+15.99)NSFVNDIFER.I	Y	47.62	1758.81	15	1.3	880.412	2	31.72		F7:630	1	76	90	Oxidation (M)	M5:Oxidation (M):44.44
Sample 1	7	8	SPARC OS=Gallus gallus GN=SPARC PE=4 SV=1	tr|F1P291|F1P291_CHICK	K.NYNMYIFPVHWQFGQLDQHPIDGYLSHTELAPLR.A	N	63.02	4098.98	34	2	1025.76	4	32.16		F7:637	5	218	251
Sample 1	8	9	SPARC OS=Gallus gallus GN=SPARC PE=2 SV=1	P36377|SPRC_CHICK	K.NYNMYIFPVHWQFGQLDQHPIDGYLSHTELAPLR.A	N	63.02	4098.98	34	2	1025.76	4	32.16		F7:637	5	218	251
Sample 1	18	17	Osteopontin OS=Gallus gallus GN=SPP1 PE=2 SV=3	P23498|OSTP_CHICK	K.LIEDDATAEVGDSQLAGLWLPK.E	Y	34.15	2340.18	22	1.3	1171.1	2	32.19		F7:638	3	165	186
Sample 1	18	18	Osteopontin OS=Gallus gallus GN=SPP1 PE=4 SV=1	tr|F1NSM8|F1NSM8_CHICK	K.LIEDDATAEVGDSQLAGLWLPK.E	Y	34.15	2340.18	22	1.3	1171.1	2	32.19		F7:638	3	165	186
Sample 1	7	8	SPARC OS=Gallus gallus GN=SPARC PE=4 SV=1	tr|F1P291|F1P291_CHICK	K.NYNMYIFPVHWQFGQLDQHPIDGYLSHTELAPLRAPLIPMEHC(+57.02)TTR.F	N	39.07	5505.66	46	0.1	918.618	6	32.3		F7:640	2	218	263	Carbamidomethylation	C43:Carbamidomethylation:1000.00
Sample 1	8	9	SPARC OS=Gallus gallus GN=SPARC PE=2 SV=1	P36377|SPRC_CHICK	K.NYNMYIFPVHWQFGQLDQHPIDGYLSHTELAPLRAPLIPMEHC(+57.02)TTR.F	N	39.07	5505.66	46	0.1	918.618	6	32.3		F7:640	2	218	263	Carbamidomethylation	C43:Carbamidomethylation:1000.00
Sample 1	5	2	Serum albumin OS=Gallus gallus GN=ALB PE=4 SV=2	tr|F2Z4L6|F2Z4L6_CHICK	K.C(+57.02)VANEDAPEC(+57.02)SKPLPSIILDEIC(+57.02)QVEK.L	N	35.42	3113.47	27	0.9	1038.83	3	33.51		F7:670	4	30	56	Carbamidomethylation	C1:Carbamidomethylation:1000.00;C10:Carbamidomethylation:1000.00;C23:Carbamidomethylation:1000.00
Sample 1	6	3	Serum albumin OS=Gallus gallus GN=ALB PE=1 SV=2	P19121|ALBU_CHICK	K.C(+57.02)VANEDAPEC(+57.02)SKPLPSIILDEIC(+57.02)QVEK.L	N	35.42	3113.47	27	0.9	1038.83	3	33.51		F7:670	4	80	106	Carbamidomethylation	C1:Carbamidomethylation:1000.00;C10:Carbamidomethylation:1000.00;C23:Carbamidomethylation:1000.00
Sample 1	18	17	Osteopontin OS=Gallus gallus GN=SPP1 PE=2 SV=3	P23498|OSTP_CHICK	K.LIEDDAT(+79.97)AEVGDSQLAGLWLPK.E	Y	33.9	2420.15	22	0.8	807.725	3	34.56		F7:694	1	165	186	Phosphorylation (STY)	T7:Phosphorylation (STY):28.13
Sample 1	18	18	Osteopontin OS=Gallus gallus GN=SPP1 PE=4 SV=1	tr|F1NSM8|F1NSM8_CHICK	K.LIEDDAT(+79.97)AEVGDSQLAGLWLPK.E	Y	33.9	2420.15	22	0.8	807.725	3	34.56		F7:694	1	165	186	Phosphorylation (STY)	T7:Phosphorylation (STY):28.13
Sample 1	21	20	Vitronectin OS=Gallus gallus PE=2 SV=1	tr|O12945|O12945_CHICK	K.LISDVWGIEGPIDAAFTR.I	Y	44.56	1959.01	18	0.6	654.011	3	34.94		F7:700	4	193	210
Sample 1	21	21	Uncharacterized protein OS=Gallus gallus GN=VTN PE=4 SV=2	tr|E1C7A7|E1C7A7_CHICK	K.LISDVWGIEGPIDAAFTR.I	Y	44.56	1959.01	18	0.6	654.011	3	34.94		F7:700	4	193	210
Sample 1	2	7	Uncharacterized protein OS=Gallus gallus GN=AHSG PE=4 SV=1	tr|E1BZE1|E1BZE1_CHICK	K.NPDVY(+15.99)LM(+15.99)LLEIGR.A	Y	37.5	1563.8	13	0.5	782.906	2	35.44		F7:709	3	172	184	Oxidation or Hydroxylation; Oxidation (M)	Y5:Oxidation or Hydroxylation:38.16;M7:Oxidation (M):1000.00
Sample 1	2	7	Uncharacterized protein OS=Gallus gallus GN=AHSG PE=4 SV=1	tr|E1BZE1|E1BZE1_CHICK	K.NPDVY(+31.99)LM(+15.99)LLEIGR.A	Y	31.87	1579.79	13	1.4	790.904	2	35.6		F7:713	2	172	184	Dihydroxy; Oxidation (M)	Y5:Dihydroxy:22.45;M7:Oxidation (M):1000.00
Sample 1	19	617	Uncharacterized protein OS=Gallus gallus GN=KNG1 PE=4 SV=2	tr|E1BX43|E1BX43_CHICK	A.TPLPFEFSDC(+57.02)DDPDVLEAVDTALQK.Y	Y	42.28	2821.3	25	0.7	941.441	3	35.77		F7:718	4	19	43	Carbamidomethylation	C10:Carbamidomethylation:1000.00
Sample 1	8	9	SPARC OS=Gallus gallus GN=SPARC PE=2 SV=1	P36377|SPRC_CHICK	R.FFEAC(+57.02)DLDFDKY(+15.99)IALEEWASC(+57.02)FGIK.E	Y	25.79	3089.38	25	-9.6	1030.79	3	35.81		F7:719	1	264	288	Carbamidomethylation; Oxidation or Hydroxylation	C5:Carbamidomethylation:1000.00;Y12:Oxidation or Hydroxylation:0.00;C21:Carbamidomethylation:1000.00
Sample 1	11	10	Decorin OS=Gallus gallus GN=DCN PE=1 SV=1	P28675|PGS2_CHICK	K.AVFNGLNQVIVLELGTNPLK.S	Y	35.81	2138.21	20	1.5	1070.11	2	35.84		F7:720	4	166	185
Sample 1	11	11	Decorin OS=Gallus gallus GN=DCN PE=4 SV=2	tr|E1BRE9|E1BRE9_CHICK	K.AVFNGLNQVIVLELGTNPLK.S	Y	35.81	2138.21	20	1.5	1070.11	2	35.84		F7:720	4	166	185
Sample 1	7	8	SPARC OS=Gallus gallus GN=SPARC PE=4 SV=1	tr|F1P291|F1P291_CHICK	R.FFEAC(+57.02)DLDNDKYIALEEWASC(+57.02)FGIK.E	Y	33.52	3040.36	25	1.9	1014.46	3	36		F7:724	4	264	288	Carbamidomethylation	C5:Carbamidomethylation:1000.00;C21:Carbamidomethylation:1000.00
Sample 1	20	35	Lumican OS=Gallus gallus GN=LUM PE=1 SV=1	P51890|LUM_CHICK	K.GLNSLLYLDLSFNQLTK.L	Y	42.07	1938.05	17	1.2	970.032	2	36.65		F7:734	1	187	203
Sample 1	20	35	Lumican OS=Gallus gallus GN=LUM PE=1 SV=1	P51890|LUM_CHICK	K.LPTGLPHSLLM(+15.99)LYFDNNQISNIPDEYFQGFK.T	Y	26.78	3626.78	31	2.6	1209.94	3	36.68		F7:735	1	204	234	Oxidation (M)	M11:Oxidation (M):1000.00
Sample 1	7	8	SPARC OS=Gallus gallus GN=SPARC PE=4 SV=1	tr|F1P291|F1P291_CHICK	R.FFEAC(+57.02)DLDN(+.98)DKYIALEEWASC(+57.02)FGIK.E	Y	28.51	3041.35	25	2	1014.79	3	36.86		F7:737	1	264	288	Carbamidomethylation; Deamidation (NQ)	C5:Carbamidomethylation:1000.00;N9:Deamidation (NQ):1000.00;C21:Carbamidomethylation:1000.00
Sample 1	15	15	Cystatin OS=Gallus gallus PE=1 SV=2	P01038|CYT_CHICK	K.YTTCTFVVYSIPWLNQIK.L	Y	39.32	2175.11	18	1.4	1088.56	2	37.46		F7:744	2	115	132
Sample 1	15	16	Uncharacterized protein OS=Gallus gallus GN=CST3 PE=4 SV=1	tr|R4GLT1|R4GLT1_CHICK	K.YTTCTFVVYSIPWLNQIK.L	Y	39.32	2175.11	18	1.4	1088.56	2	37.46		F7:744	2	127	144
Sample 1	5	2	Serum albumin OS=Gallus gallus GN=ALB PE=4 SV=2	tr|F2Z4L6|F2Z4L6_CHICK	R.RHPFLYAPAILSFAVDFEHALQSC(+57.02)C(+57.02)K.E	N	48.41	3076.51	26	0.9	770.134	4	38.05		F7:751	2	123	148	Carbamidomethylation	C24:Carbamidomethylation:1000.00;C25:Carbamidomethylation:1000.00
Sample 1	6	3	Serum albumin OS=Gallus gallus GN=ALB PE=1 SV=2	P19121|ALBU_CHICK	R.RHPFLYAPAILSFAVDFEHALQSC(+57.02)C(+57.02)K.E	N	48.41	3076.51	26	0.9	770.134	4	38.05		F7:751	2	173	198	Carbamidomethylation	C24:Carbamidomethylation:1000.00;C25:Carbamidomethylation:1000.00
Sample 1	26	616	Uncharacterized protein OS=Gallus gallus GN=THBS1 PE=4 SV=2	tr|F1P0J8|F1P0J8_CHICK	K.DIQAVC(+57.02)GFSC(+57.02)DELTNMFVELQGLR.S	Y	39.9	2801.28	24	-0.4	934.768	3	39.05		F7:761	1	269	292	Carbamidomethylation	C6:Carbamidomethylation:1000.00;C10:Carbamidomethylation:1000.00
Sample 1	12	37	Osteocalcin OS=Gallus gallus GN=BGLAP PE=1 SV=2	P02822|OSTCN_CHICK	R.FYGPV	Y	27.48	581.285	5	-0.1	582.292	1	39.23		F7:763	9	93	97
Sample 2	1	1	Collagen alpha-2(I) chain OS=Gallus gallus GN=COL1A2 PE=4 SV=1	tr|F1P0H9|F1P0H9_CHICK	R.GAPGN(+15.99)PGPSGALGAP(+15.99)GPHGQVGPSGKPGNR.G	Y	12.52	2676.31	30	1	670.086	4	13.28		F8:111	1	948	977	Oxidation or Hydroxylation	N5:Oxidation or Hydroxylation:0.00;P15:Oxidation or Hydroxylation:0.00
Sample 2	4	4	Collagen alpha-1(I) chain OS=Gallus gallus GN=COL1A1 PE=1 SV=3	P02457|CO1A1_CHICK	K.GDRGETGPAGPP(+15.99)GAP(+15.99)GAPGAP(+15.99)GPVGPAGK.N	Y	32.1	2496.2	29	0.6	833.074	3	13.49		F8:116	1	1023	1051	Oxidation or Hydroxylation	P12:Oxidation or Hydroxylation:11.06;P15:Oxidation or Hydroxylation:49.79;P21:Oxidation or Hydroxylation:47.09
Sample 2	17	66	Alpha 1 type II procollagen (Fragment) OS=Gallus gallus GN=COL2A1 PE=4 SV=1	tr|Q7T2Z7|Q7T2Z7_CHICK	K.GETGPAGPQGAPGPAGEEGKH(sub R)GAR.G	Y	23.09	2184.03	24	8.1	1093.03	2	13.86		F8:125	1	253	276	Mutation
Sample 2	17	67	Collagen alpha-1(II) chain (Fragment) OS=Gallus gallus GN=COL2A1 PE=4 SV=2	tr|H9L2B7|H9L2B7_CHICK	K.GETGPAGPQGAPGPAGEEGKH(sub R)GAR.G	Y	23.09	2184.03	24	8.1	1093.03	2	13.86		F8:125	1	292	315	Mutation
Sample 2	17	68	Alpha 1 type IIA collagen OS=Gallus gallus GN=COL2A1 PE=2 SV=1	tr|Q90W37|Q90W37_CHICK	K.GETGPAGPQGAPGPAGEEGKH(sub R)GAR.G	Y	23.09	2184.03	24	8.1	1093.03	2	13.86		F8:125	1	404	427	Mutation
Sample 2	4	4	Collagen alpha-1(I) chain OS=Gallus gallus GN=COL1A1 PE=1 SV=3	P02457|CO1A1_CHICK	R.GAP(+15.99)GPP(+15.99)GAVGAAGKDGEAGAQGPPGPTGPAGER.G	Y	48.36	2839.35	33	1.7	947.458	3	14.17		F8:133	2	588	620	Oxidation or Hydroxylation	P3:Oxidation or Hydroxylation:17.01;P6:Oxidation or Hydroxylation:17.01
Sample 2	1	1	Collagen alpha-2(I) chain OS=Gallus gallus GN=COL1A2 PE=4 SV=1	tr|F1P0H9|F1P0H9_CHICK	R.GASGPVGAKGPN(+.98)GDAGR(+15.99)PGEPGLM(+15.99)GPR.G	Y	39.72	2491.19	27	0.9	623.805	4	14.55		F8:142	1	423	449	Deamidation (NQ); Oxidation or Hydroxylation; Oxidation (M)	N12:Deamidation (NQ):1000.00;R17:Oxidation or Hydroxylation:0.00;M24:Oxidation (M):1000.00
Sample 2	1	1	Collagen alpha-2(I) chain OS=Gallus gallus GN=COL1A2 PE=4 SV=1	tr|F1P0H9|F1P0H9_CHICK	R.GASGPVGAKGPN(+.98)GDAGRP(+15.99)GEPGLMGPR(+15.99).G	Y	27.45	2491.19	27	0.6	831.404	3	14.64		F8:145	1	423	449	Deamidation (NQ); Oxidation or Hydroxylation	N12:Deamidation (NQ):1000.00;P18:Oxidation or Hydroxylation:12.28;R27:Oxidation or Hydroxylation:0.00
Sample 2	5	2	Serum albumin OS=Gallus gallus GN=ALB PE=4 SV=2	tr|F2Z4L6|F2Z4L6_CHICK	R.KQETTPINDNVSQC(+57.02)C(+57.02)SSSYANR.R	Y	40.36	2558.11	22	0.7	1280.06	2	14.71		F8:147	3	441	462	Carbamidomethylation	C14:Carbamidomethylation:1000.00;C15:Carbamidomethylation:1000.00
Sample 2	17	66	Alpha 1 type II procollagen (Fragment) OS=Gallus gallus GN=COL2A1 PE=4 SV=1	tr|Q7T2Z7|Q7T2Z7_CHICK	R.GAPGERGEPGM(sub A)PGPAGFAGPP(+15.99)GADGQP(+15.99)GAK.G	Y	21.06	2718.25	30	-5.8	907.084	3	14.87		F8:148	1	601	630	Oxidation or Hydroxylation; Mutation	P21:Oxidation or Hydroxylation:57.45;P27:Oxidation or Hydroxylation:92.25
Sample 2	17	67	Collagen alpha-1(II) chain (Fragment) OS=Gallus gallus GN=COL2A1 PE=4 SV=2	tr|H9L2B7|H9L2B7_CHICK	R.GAPGERGEPGM(sub A)PGPAGFAGPP(+15.99)GADGQP(+15.99)GAK.G	Y	21.06	2718.25	30	-5.8	907.084	3	14.87		F8:148	1	640	669	Oxidation or Hydroxylation; Mutation	P21:Oxidation or Hydroxylation:57.45;P27:Oxidation or Hydroxylation:92.25
Sample 2	17	68	Alpha 1 type IIA collagen OS=Gallus gallus GN=COL2A1 PE=2 SV=1	tr|Q90W37|Q90W37_CHICK	R.GAPGERGEPGM(sub A)PGPAGFAGPP(+15.99)GADGQP(+15.99)GAK.G	Y	21.06	2718.25	30	-5.8	907.084	3	14.87		F8:148	1	752	781	Oxidation or Hydroxylation; Mutation	P21:Oxidation or Hydroxylation:57.45;P27:Oxidation or Hydroxylation:92.25
Sample 2	1	1	Collagen alpha-2(I) chain OS=Gallus gallus GN=COL1A2 PE=4 SV=1	tr|F1P0H9|F1P0H9_CHICK	R.GLHGEFGVP(+15.99)GPAGPRGER.G	Y	35.13	1804.9	18	0.5	602.64	3	15.38		F8:163	2	573	590	Oxidation or Hydroxylation	P9:Oxidation or Hydroxylation:0.00
Sample 2	10	13	Uncharacterized protein OS=Gallus gallus GN=DMP1 PE=4 SV=2	tr|F1NUV7|F1NUV7_CHICK	R.KQAAELDDDDC(+57.02)QDGY	Y	43.08	1741.67	15	1.3	871.845	2	15.56		F8:168	2	415	429	Carbamidomethylation	C11:Carbamidomethylation:1000.00
Sample 2	10	13	Uncharacterized protein OS=Gallus gallus GN=DMP1 PE=4 SV=2	tr|F1NUV7|F1NUV7_CHICK	R.SAVSDLDT(+79.97)EEEQSR.S	Y	46.6	1644.65	14	1.3	823.334	2	15.91		F8:178	2	303	316	Phosphorylation (STY)	T8:Phosphorylation (STY):59.30
Sample 2	1	1	Collagen alpha-2(I) chain OS=Gallus gallus GN=COL1A2 PE=4 SV=1	tr|F1P0H9|F1P0H9_CHICK	R.GLHGEFGVP(+15.99)GPAGPR(+15.99).G	Y	47.08	1478.73	15	1.3	740.371	2	15.94		F8:179	1	573	587	Oxidation or Hydroxylation	P9:Oxidation or Hydroxylation:45.01;R15:Oxidation or Hydroxylation:0.00
Sample 2	1	1	Collagen alpha-2(I) chain OS=Gallus gallus GN=COL1A2 PE=4 SV=1	tr|F1P0H9|F1P0H9_CHICK	R.GLHGEFGVP(+15.99)GP(+15.99)AGPR.G	Y	19.13	1478.73	15	0.3	493.916	3	15.99		F8:181	1	573	587	Oxidation or Hydroxylation	P9:Oxidation or Hydroxylation:56.34;P11:Oxidation or Hydroxylation:28.36
Sample 2	4	4	Collagen alpha-1(I) chain OS=Gallus gallus GN=COL1A1 PE=1 SV=3	P02457|CO1A1_CHICK	R.GFP(+15.99)GADGIAGPKGPP(+15.99)GER.G	Y	51.3	1710.83	18	1.1	856.424	2	16.27		F8:188	3	483	500	Oxidation or Hydroxylation	P3:Oxidation or Hydroxylation:8.69;P15:Oxidation or Hydroxylation:0.00
Sample 2	1	1	Collagen alpha-2(I) chain OS=Gallus gallus GN=COL1A2 PE=4 SV=1	tr|F1P0H9|F1P0H9_CHICK	V.GFP(+15.99)GADGRVGPIGPAGN(+.98)R.G	Y	13.47	1710.84	18	-6.2	571.285	3	16.3		F8:189	1	468	485	Oxidation or Hydroxylation; Deamidation (NQ)	P3:Oxidation or Hydroxylation:17.01;N17:Deamidation (NQ):1000.00
Sample 2	1	1	Collagen alpha-2(I) chain OS=Gallus gallus GN=COL1A2 PE=4 SV=1	tr|F1P0H9|F1P0H9_CHICK	R.VGN(sub P)P(+15.99)GPAGITGPP(+15.99)GPPGPAGK(+15.99).D	Y	13.12	1841.93	21	4.9	921.975	2	16.35		F8:191	1	794	814	Oxidation or Hydroxylation; Mutation	P4:Oxidation or Hydroxylation:14.02;P13:Oxidation or Hydroxylation:7.21;K21:Oxidation or Hydroxylation:0.00
Sample 2	4	4	Collagen alpha-1(I) chain OS=Gallus gallus GN=COL1A1 PE=1 SV=3	P02457|CO1A1_CHICK	R.GFP(+15.99)GADGIAGPK(+15.99)GPPGER.G	Y	12.94	1710.83	18	0.7	571.285	3	16.51		F8:196	1	483	500	Oxidation or Hydroxylation	P3:Oxidation or Hydroxylation:17.01;K12:Oxidation or Hydroxylation:0.00
Sample 2	1	1	Collagen alpha-2(I) chain OS=Gallus gallus GN=COL1A2 PE=4 SV=1	tr|F1P0H9|F1P0H9_CHICK	R.GPP(+15.99)GPSGPPGKDGRN(+.98)GLP(+15.99)GPIGPAGVR.G	Y	37.28	2493.27	27	0.7	624.326	4	16.62		F8:199	2	1053	1079	Oxidation or Hydroxylation; Deamidation (NQ)	P3:Oxidation or Hydroxylation:7.65;N15:Deamidation (NQ):1000.00;P18:Oxidation or Hydroxylation:25.70
Sample 2	1	1	Collagen alpha-2(I) chain OS=Gallus gallus GN=COL1A2 PE=4 SV=1	tr|F1P0H9|F1P0H9_CHICK	K.GEIGPAGNVGPTGPAGPR.G	Y	53.09	1602.81	18	0.8	802.414	2	16.91		F8:204	2	264	281
Sample 2	3	6	Apolipoprotein A-I OS=Gallus gallus GN=APOA1 PE=1 SV=2	P08250|APOA1_CHICK	R.LTPVAQELK.E	Y	33.83	997.581	9	1	499.798	2	16.94		F8:205	2	142	150
Sample 2	4	4	Collagen alpha-1(I) chain OS=Gallus gallus GN=COL1A1 PE=1 SV=3	P02457|CO1A1_CHICK	K.GATGAP(+15.99)GIAGAP(+15.99)GFP(+15.99)GAR.G	Y	48.1	1571.77	18	1.3	786.893	2	17.48		F8:222	3	387	404	Oxidation or Hydroxylation	P6:Oxidation or Hydroxylation:89.48;P12:Oxidation or Hydroxylation:9.16;P15:Oxidation or Hydroxylation:0.00
Sample 2	4	4	Collagen alpha-1(I) chain OS=Gallus gallus GN=COL1A1 PE=1 SV=3	P02457|CO1A1_CHICK	R.GLTGPIGPP(+15.99)GPAGAPGD(+15.99)KGEAGPP(+15.99)GPAGPTGAR.G	Y	57.81	2878.42	33	0.9	960.482	3	17.5		F8:223	3	753	785	Oxidation or Hydroxylation	P9:Oxidation or Hydroxylation:69.71;D17:Oxidation or Hydroxylation:74.48;P24:Oxidation or Hydroxylation:98.05
Sample 2	4	4	Collagen alpha-1(I) chain OS=Gallus gallus GN=COL1A1 PE=1 SV=3	P02457|CO1A1_CHICK	R.GFP(+15.99)GADGIAGPK.G	Y	40.41	1101.55	12	0.6	551.78	2	17.59		F8:226	3	483	494	Oxidation or Hydroxylation	P3:Oxidation or Hydroxylation:11.06
Sample 2	4	4	Collagen alpha-1(I) chain OS=Gallus gallus GN=COL1A1 PE=1 SV=3	P02457|CO1A1_CHICK	R.GPP(+15.99)GPMGPP(+15.99)GLAGPP(+15.99)GEAGR.E	Y	47.03	1815.86	20	1.7	908.937	2	17.67		F8:229	2	984	1003	Oxidation or Hydroxylation	P3:Oxidation or Hydroxylation:11.06;P9:Oxidation or Hydroxylation:26.02;P15:Oxidation or Hydroxylation:11.06
Sample 2	4	4	Collagen alpha-1(I) chain OS=Gallus gallus GN=COL1A1 PE=1 SV=3	P02457|CO1A1_CHICK	K.GATGAP(+15.99)GIAGAP(+15.99)GFPGAR(+15.99).G	Y	46.24	1571.77	18	1.4	786.893	2	17.73		F8:231	1	387	404	Oxidation or Hydroxylation	P6:Oxidation or Hydroxylation:78.75;P12:Oxidation or Hydroxylation:8.64;R18:Oxidation or Hydroxylation:0.00
Sample 2	18	17	Osteopontin OS=Gallus gallus GN=SPP1 PE=2 SV=3	P23498|OSTP_CHICK	R.GDSVAYGFR.A	Y	37.08	970.451	9	0.5	486.233	2	17.85		F8:235	2	139	147
Sample 2	18	18	Osteopontin OS=Gallus gallus GN=SPP1 PE=4 SV=1	tr|F1NSM8|F1NSM8_CHICK	R.GDSVAYGFR.A	Y	37.08	970.451	9	0.5	486.233	2	17.85		F8:235	2	139	147
Sample 2	7	8	SPARC OS=Gallus gallus GN=SPARC PE=4 SV=1	tr|F1P291|F1P291_CHICK	K.RLEAGDHTVELLAR.D	N	47.7	1578.85	14	0.7	527.29	3	17.9		F8:237	1	200	213
Sample 2	8	9	SPARC OS=Gallus gallus GN=SPARC PE=2 SV=1	P36377|SPRC_CHICK	K.RLEAGDHTVELLAR.D	N	47.7	1578.85	14	0.7	527.29	3	17.9		F8:237	1	200	213
Sample 2	9	25	Matrix Gla protein OS=Gallus gallus GN=MGP PE=2 SV=1	O42413|MGP_CHICK	R.AN(+.98)GFIRDDTGLR.A	Y	36.54	1334.66	12	0.1	445.893	3	18.07		F8:243	5	41	52	Deamidation (NQ)	N2:Deamidation (NQ):1000.00
Sample 2	1	1	Collagen alpha-2(I) chain OS=Gallus gallus GN=COL1A2 PE=4 SV=1	tr|F1P0H9|F1P0H9_CHICK	R.GLP(+15.99)GESGAVGPAGPIGSR.G	Y	47.79	1593.81	18	0.8	797.913	2	18.27		F8:249	4	591	608	Oxidation or Hydroxylation	P3:Oxidation or Hydroxylation:112.87
Sample 2	1	1	Collagen alpha-2(I) chain OS=Gallus gallus GN=COL1A2 PE=4 SV=1	tr|F1P0H9|F1P0H9_CHICK	K.GETGPAGPP(+15.99)GFQGLP(+15.99)GPSGPAGEAGKP(+15.99)GER.G	Y	57.08	2776.31	30	1.1	926.443	3	18.54		F8:258	4	543	572	Oxidation or Hydroxylation	P9:Oxidation or Hydroxylation:67.69;P15:Oxidation or Hydroxylation:67.73;P27:Oxidation or Hydroxylation:129.22
Sample 2	1	1	Collagen alpha-2(I) chain OS=Gallus gallus GN=COL1A2 PE=4 SV=1	tr|F1P0H9|F1P0H9_CHICK	R.GDAGPP(+15.99)GMTGFP(+15.99)GAAGR.V	Y	52.33	1546.68	17	1	774.35	2	18.57		F8:259	2	777	793	Oxidation or Hydroxylation	P6:Oxidation or Hydroxylation:26.02;P12:Oxidation or Hydroxylation:10.65
Sample 2	1	1	Collagen alpha-2(I) chain OS=Gallus gallus GN=COL1A2 PE=4 SV=1	tr|F1P0H9|F1P0H9_CHICK	R.NGLP(+15.99)GPIGPAGVR.G	Y	36.76	1219.67	13	1.1	610.842	2	18.6		F8:260	4	1067	1079	Oxidation or Hydroxylation	P4:Oxidation or Hydroxylation:55.92
Sample 2	1	1	Collagen alpha-2(I) chain OS=Gallus gallus GN=COL1A2 PE=4 SV=1	tr|F1P0H9|F1P0H9_CHICK	R.VGPIGPAGNRGEPGN(+15.99)IGFP(+15.99)GPK.G	Y	36.43	2119.08	22	1	707.368	3	18.82		F8:267	1	476	497	Oxidation or Hydroxylation	N15:Oxidation or Hydroxylation:0.00;P19:Oxidation or Hydroxylation:0.00
Sample 2	4	4	Collagen alpha-1(I) chain OS=Gallus gallus GN=COL1A1 PE=1 SV=3	P02457|CO1A1_CHICK	R.GFP(+15.99)GLP(+15.99)GPSGEP(+15.99)GK.Q	N	27.1	1343.64	14	0.8	672.826	2	18.87		F8:269	2	960	973	Oxidation or Hydroxylation	P3:Oxidation or Hydroxylation:11.06;P6:Oxidation or Hydroxylation:45.01;P12:Oxidation or Hydroxylation:0.00
Sample 2	17	66	Alpha 1 type II procollagen (Fragment) OS=Gallus gallus GN=COL2A1 PE=4 SV=1	tr|Q7T2Z7|Q7T2Z7_CHICK	R.GFP(+15.99)GLP(+15.99)GPSGEP(+15.99)GK.Q	N	27.1	1343.64	14	0.8	672.826	2	18.87		F8:269	2	775	788	Oxidation or Hydroxylation	P3:Oxidation or Hydroxylation:11.06;P6:Oxidation or Hydroxylation:45.01;P12:Oxidation or Hydroxylation:0.00
Sample 2	17	67	Collagen alpha-1(II) chain (Fragment) OS=Gallus gallus GN=COL2A1 PE=4 SV=2	tr|H9L2B7|H9L2B7_CHICK	R.GFP(+15.99)GLP(+15.99)GPSGEP(+15.99)GK.Q	N	27.1	1343.64	14	0.8	672.826	2	18.87		F8:269	2	814	827	Oxidation or Hydroxylation	P3:Oxidation or Hydroxylation:11.06;P6:Oxidation or Hydroxylation:45.01;P12:Oxidation or Hydroxylation:0.00
Sample 2	17	68	Alpha 1 type IIA collagen OS=Gallus gallus GN=COL2A1 PE=2 SV=1	tr|Q90W37|Q90W37_CHICK	R.GFP(+15.99)GLP(+15.99)GPSGEP(+15.99)GK.Q	N	27.1	1343.64	14	0.8	672.826	2	18.87		F8:269	2	926	939	Oxidation or Hydroxylation	P3:Oxidation or Hydroxylation:11.06;P6:Oxidation or Hydroxylation:45.01;P12:Oxidation or Hydroxylation:0.00
Sample 2	1	1	Collagen alpha-2(I) chain OS=Gallus gallus GN=COL1A2 PE=4 SV=1	tr|F1P0H9|F1P0H9_CHICK	R.VGPIGPAGNRGEP(+15.99)GNIGFPGP(+15.99)K.G	Y	42.21	2119.08	22	1.4	1060.55	2	18.95		F8:272	1	476	497	Oxidation or Hydroxylation	P13:Oxidation or Hydroxylation:33.18;P21:Oxidation or Hydroxylation:0.00
Sample 2	1	1	Collagen alpha-2(I) chain OS=Gallus gallus GN=COL1A2 PE=4 SV=1	tr|F1P0H9|F1P0H9_CHICK	K.GAAGLP(+15.99)GVAGAP(+15.99)GLPGP(+15.99)R.G	Y	41.39	1561.82	18	1.4	781.919	2	19.21		F8:280	4	309	326	Oxidation or Hydroxylation	P6:Oxidation or Hydroxylation:161.68;P12:Oxidation or Hydroxylation:38.16;P17:Oxidation or Hydroxylation:0.00
Sample 2	4	4	Collagen alpha-1(I) chain OS=Gallus gallus GN=COL1A1 PE=1 SV=3	P02457|CO1A1_CHICK	R.GLP(+15.99)GTAGLPGMK(+15.99).G	Y	20.81	1129.58	12	1.1	565.798	2	19.3		F8:282	1	243	254	Oxidation or Hydroxylation	P3:Oxidation or Hydroxylation:47.92;K12:Oxidation or Hydroxylation:9.42
Sample 2	4	4	Collagen alpha-1(I) chain OS=Gallus gallus GN=COL1A1 PE=1 SV=3	P02457|CO1A1_CHICK	R.GQAGVMGFP(+15.99)GPK.G	Y	44.83	1160.56	12	0.7	581.29	2	19.38		F8:285	4	564	575	Oxidation or Hydroxylation	P9:Oxidation or Hydroxylation:4.64
Sample 2	7	8	SPARC OS=Gallus gallus GN=SPARC PE=4 SV=1	tr|F1P291|F1P291_CHICK	K.LHLDYIGPC(+57.02)K.F	N	37.77	1214.61	10	0.4	608.313	2	19.41		F8:286	1	136	145	Carbamidomethylation	C9:Carbamidomethylation:1000.00
Sample 2	8	9	SPARC OS=Gallus gallus GN=SPARC PE=2 SV=1	P36377|SPRC_CHICK	K.LHLDYIGPC(+57.02)K.F	N	37.77	1214.61	10	0.4	608.313	2	19.41		F8:286	1	136	145	Carbamidomethylation	C9:Carbamidomethylation:1000.00
Sample 2	1	1	Collagen alpha-2(I) chain OS=Gallus gallus GN=COL1A2 PE=4 SV=1	tr|F1P0H9|F1P0H9_CHICK	K.GP(+15.99)KGETGPTGAIGPIGASGPP(+15.99)GPVGAAGPAGPR.G	Y	59.08	2836.45	33	1	946.49	3	19.44		F8:287	2	744	776	Oxidation or Hydroxylation	P2:Oxidation or Hydroxylation:0.00;P21:Oxidation or Hydroxylation:97.31
Sample 2	1	1	Collagen alpha-2(I) chain OS=Gallus gallus GN=COL1A2 PE=4 SV=1	tr|F1P0H9|F1P0H9_CHICK	K.GPKGETGPTGAIGPIGASGPP(+15.99)GPVGAAGPAGPR.G	Y	53.82	2820.45	33	0.7	941.159	3	19.47		F8:288	1	744	776	Oxidation or Hydroxylation	P21:Oxidation or Hydroxylation:205.45
Sample 2	4	4	Collagen alpha-1(I) chain OS=Gallus gallus GN=COL1A1 PE=1 SV=3	P02457|CO1A1_CHICK	R.GFP(+15.99)GLP(+15.99)GPSGEPGK.Q	N	33.76	1327.64	14	0.8	664.828	2	19.5		F8:289	4	960	973	Oxidation or Hydroxylation	P3:Oxidation or Hydroxylation:12.28;P6:Oxidation or Hydroxylation:39.76
Sample 2	17	66	Alpha 1 type II procollagen (Fragment) OS=Gallus gallus GN=COL2A1 PE=4 SV=1	tr|Q7T2Z7|Q7T2Z7_CHICK	R.GFP(+15.99)GLP(+15.99)GPSGEPGK.Q	N	33.76	1327.64	14	0.8	664.828	2	19.5		F8:289	4	775	788	Oxidation or Hydroxylation	P3:Oxidation or Hydroxylation:12.28;P6:Oxidation or Hydroxylation:39.76
Sample 2	17	67	Collagen alpha-1(II) chain (Fragment) OS=Gallus gallus GN=COL2A1 PE=4 SV=2	tr|H9L2B7|H9L2B7_CHICK	R.GFP(+15.99)GLP(+15.99)GPSGEPGK.Q	N	33.76	1327.64	14	0.8	664.828	2	19.5		F8:289	4	814	827	Oxidation or Hydroxylation	P3:Oxidation or Hydroxylation:12.28;P6:Oxidation or Hydroxylation:39.76
Sample 2	17	68	Alpha 1 type IIA collagen OS=Gallus gallus GN=COL2A1 PE=2 SV=1	tr|Q90W37|Q90W37_CHICK	R.GFP(+15.99)GLP(+15.99)GPSGEPGK.Q	N	33.76	1327.64	14	0.8	664.828	2	19.5		F8:289	4	926	939	Oxidation or Hydroxylation	P3:Oxidation or Hydroxylation:12.28;P6:Oxidation or Hydroxylation:39.76
Sample 2	1	1	Collagen alpha-2(I) chain OS=Gallus gallus GN=COL1A2 PE=4 SV=1	tr|F1P0H9|F1P0H9_CHICK	R.GLPGESGAVGPAGPIGSR.G	Y	30.65	1577.82	18	0	789.915	2	19.53		F8:290	1	591	608
Sample 2	2	7	Uncharacterized protein OS=Gallus gallus GN=AHSG PE=4 SV=1	tr|E1BZE1|E1BZE1_CHICK	K.VNGQFSVLASK.C	Y	47.89	1148.62	11	0.5	575.317	2	19.64		F8:294	3	118	128
Sample 2	2	7	Uncharacterized protein OS=Gallus gallus GN=AHSG PE=4 SV=1	tr|E1BZE1|E1BZE1_CHICK	R.AAAEVAQHDKVPHPVGFVPPPPLCPGK(+57.02).I	Y	23.69	2814.46	27	1.5	704.624	4	19.72		F8:297	4	312	338	Carbamidomethylation (DHKE X@N-term)	K27:Carbamidomethylation (DHKE X@N-term):60.45
Sample 2	2	7	Uncharacterized protein OS=Gallus gallus GN=AHSG PE=4 SV=1	tr|E1BZE1|E1BZE1_CHICK	R.FALNRIEQVR.V	Y	12.78	1244.7	10	0.9	623.357	2	19.83		F8:301	1	55	64
Sample 2	4	4	Collagen alpha-1(I) chain OS=Gallus gallus GN=COL1A1 PE=1 SV=3	P02457|CO1A1_CHICK	K.DGLNGLP(+15.99)GPIGP(+15.99)PGPR(+15.99).G	Y	39.3	1560.79	16	0.8	781.403	2	20.16		F8:312	3	1142	1157	Oxidation or Hydroxylation	P7:Oxidation or Hydroxylation:15.73;P12:Oxidation or Hydroxylation:0.00;R16:Oxidation or Hydroxylation:0.00
Sample 2	2	7	Uncharacterized protein OS=Gallus gallus GN=AHSG PE=4 SV=1	tr|E1BZE1|E1BZE1_CHICK	R.AAAEVAQHDKVPHPVGFVPPPPLC(+57.02)PGK.I	Y	51.31	2814.46	27	1.5	939.163	3	20.19		F8:313	12	312	338	Carbamidomethylation	C24:Carbamidomethylation:1000.00
Sample 2	11	10	Decorin OS=Gallus gallus GN=DCN PE=1 SV=1	P28675|PGS2_CHICK	K.NLHALILVNNK.I	Y	39.79	1247.73	11	1	624.875	2	20.24		F8:315	1	104	114
Sample 2	11	11	Decorin OS=Gallus gallus GN=DCN PE=4 SV=2	tr|E1BRE9|E1BRE9_CHICK	K.NLHALILVNNK.I	Y	39.79	1247.73	11	1	624.875	2	20.24		F8:315	1	104	114
Sample 2	2	7	Uncharacterized protein OS=Gallus gallus GN=AHSG PE=4 SV=1	tr|E1BZE1|E1BZE1_CHICK	K.VN(+.98)GQFSVLASK.C	Y	44.73	1149.6	11	0.9	575.809	2	20.42		F8:321	4	118	128	Deamidation (NQ)	N2:Deamidation (NQ):40.21
Sample 2	3	6	Apolipoprotein A-I OS=Gallus gallus GN=APOA1 PE=1 SV=2	P08250|APOA1_CHICK	K.WTEELEQYR.Q	Y	37.7	1252.57	9	0.7	627.294	2	20.45		F8:322	4	131	139
Sample 2	1	1	Collagen alpha-2(I) chain OS=Gallus gallus GN=COL1A2 PE=4 SV=1	tr|F1P0H9|F1P0H9_CHICK	R.GSDGSAGPTGPAGPIGAAGPP(+15.99)GFP(+15.99)GAP(+15.99)GAK.G	Y	46.91	2520.19	30	2.7	1261.1	2	20.64		F8:328	1	234	263	Oxidation or Hydroxylation	P21:Oxidation or Hydroxylation:50.34;P24:Oxidation or Hydroxylation:109.46;P27:Oxidation or Hydroxylation:107.72
Sample 2	3	6	Apolipoprotein A-I OS=Gallus gallus GN=APOA1 PE=1 SV=2	P08250|APOA1_CHICK	K.M(+15.99)TPLVQEFR.E	Y	41.41	1135.57	9	1.1	568.793	2	20.8		F8:331	4	230	238	Oxidation (M)	M1:Oxidation (M):1000.00
Sample 2	24	26	Secreted phosphoprotein 24 OS=Gallus gallus GN=SPP2 PE=4 SV=1	tr|F1P4U3|F1P4U3_CHICK	K.VGPFVPTAVC(+57.02)K.S	Y	38.64	1173.62	11	0.9	587.819	2	20.85		F8:333	2	107	117	Carbamidomethylation	C10:Carbamidomethylation:1000.00
Sample 2	24	27	Secreted phosphoprotein 24 OS=Gallus gallus GN=SPP2 PE=2 SV=1	Q710A0|SPP24_CHICK	K.VGPFVPTAVC(+57.02)K.S	Y	38.64	1173.62	11	0.9	587.819	2	20.85		F8:333	2	107	117	Carbamidomethylation	C10:Carbamidomethylation:1000.00
Sample 2	1	1	Collagen alpha-2(I) chain OS=Gallus gallus GN=COL1A2 PE=4 SV=1	tr|F1P0H9|F1P0H9_CHICK	R.N(+.98)GLP(+15.99)GPIGPAGVR.G	Y	38.8	1220.65	13	0.5	611.333	2	20.96		F8:337	2	1067	1079	Deamidation (NQ); Oxidation or Hydroxylation	N1:Deamidation (NQ):1000.00;P4:Oxidation or Hydroxylation:60.92
Sample 2	3	6	Apolipoprotein A-I OS=Gallus gallus GN=APOA1 PE=1 SV=2	P08250|APOA1_CHICK	K.ASGKDAIAQFESSAVGK.Q	Y	48.72	1664.84	17	1.3	833.427	2	21.32		F8:348	4	47	63
Sample 2	3	6	Apolipoprotein A-I OS=Gallus gallus GN=APOA1 PE=1 SV=2	P08250|APOA1_CHICK	K.LADNLDTLSAAAAK.L	Y	47.03	1372.72	14	0.8	687.368	2	21.43		F8:352	4	69	82
Sample 2	1	1	Collagen alpha-2(I) chain OS=Gallus gallus GN=COL1A2 PE=4 SV=1	tr|F1P0H9|F1P0H9_CHICK	K.GETGPTGAIGPIGASGPPGP(+15.99)VGAAGPAGPR.G	Y	26.74	2538.28	30	1.5	847.103	3	21.46		F8:353	1	747	776	Oxidation or Hydroxylation	P20:Oxidation or Hydroxylation:0.00
Sample 2	12	37	Osteocalcin OS=Gallus gallus GN=BGLAP PE=1 SV=2	P02822|OSTCN_CHICK	R.F(+15.99)Y(+15.99)GPV	Y	22.72	613.275	5	1.7	614.283	1	21.5		F8:354	2	93	97	Oxidation or Hydroxylation	F1:Oxidation or Hydroxylation:51.69;Y2:Oxidation or Hydroxylation:52.04
Sample 2	1	1	Collagen alpha-2(I) chain OS=Gallus gallus GN=COL1A2 PE=4 SV=1	tr|F1P0H9|F1P0H9_CHICK	R.GDP(+15.99)GPVGPVGPAGAFGPR.G	Y	48.09	1619.81	18	0.4	810.91	2	21.64		F8:358	4	978	995	Oxidation or Hydroxylation	P3:Oxidation or Hydroxylation:14.02
Sample 2	5	2	Serum albumin OS=Gallus gallus GN=ALB PE=4 SV=2	tr|F2Z4L6|F2Z4L6_CHICK	K.TDNPAEC(+57.02)YANAQEQLNQHIK.E	N	29.94	2343.05	20	0.5	782.026	3	21.96		F8:367	1	341	360	Carbamidomethylation	C7:Carbamidomethylation:1000.00
Sample 2	6	3	Serum albumin OS=Gallus gallus GN=ALB PE=1 SV=2	P19121|ALBU_CHICK	K.TDNPAEC(+57.02)YANAQEQLNQHIK.E	N	29.94	2343.05	20	0.5	782.026	3	21.96		F8:367	1	391	410	Carbamidomethylation	C7:Carbamidomethylation:1000.00
Sample 2	35	85	Uncharacterized protein OS=Gallus gallus GN=COL4A6 PE=4 SV=2	tr|F1P3T8|F1P3T8_CHICK	R.GDVGPP(+15.99)GLPVLGAQ(+.98)EQA.L	Y	16.2	1620.8	17	6.2	811.412	2	22.02		F8:369	1	957	973	Oxidation or Hydroxylation; Deamidation (NQ)	P6:Oxidation or Hydroxylation:10.11;Q14:Deamidation (NQ):0.00
Sample 2	5	2	Serum albumin OS=Gallus gallus GN=ALB PE=4 SV=2	tr|F2Z4L6|F2Z4L6_CHICK	K.ADPERNEC(+57.02)FLSFK.V	N	31.05	1611.74	13	0.9	806.875	2	22.1		F8:371	2	71	83	Carbamidomethylation	C8:Carbamidomethylation:1000.00
Sample 2	6	3	Serum albumin OS=Gallus gallus GN=ALB PE=1 SV=2	P19121|ALBU_CHICK	K.ADPERNEC(+57.02)FLSFK.V	N	31.05	1611.74	13	0.9	806.875	2	22.1		F8:371	2	121	133	Carbamidomethylation	C8:Carbamidomethylation:1000.00
Sample 2	1	1	Collagen alpha-2(I) chain OS=Gallus gallus GN=COL1A2 PE=4 SV=1	tr|F1P0H9|F1P0H9_CHICK	R.GFP(+15.99)GTP(+15.99)GLP(+15.99)GFK.G	Y	38.25	1221.6	12	0.7	611.809	2	22.38		F8:378	2	165	176	Oxidation or Hydroxylation	P3:Oxidation or Hydroxylation:24.44;P6:Oxidation or Hydroxylation:38.32;P9:Oxidation or Hydroxylation:0.00
Sample 2	1	1	Collagen alpha-2(I) chain OS=Gallus gallus GN=COL1A2 PE=4 SV=1	tr|F1P0H9|F1P0H9_CHICK	R.GDPGPVGPVGPAGAFGPR.G	Y	50.6	1603.81	18	1.2	802.913	2	22.57		F8:384	4	978	995
Sample 2	1	1	Collagen alpha-2(I) chain OS=Gallus gallus GN=COL1A2 PE=4 SV=1	tr|F1P0H9|F1P0H9_CHICK	R.GFP(+15.99)GTP(+15.99)GLPGFK(+15.99).G	Y	23.64	1221.6	12	0.6	611.809	2	22.65		F8:387	1	165	176	Oxidation or Hydroxylation	P3:Oxidation or Hydroxylation:17.01;P6:Oxidation or Hydroxylation:22.45;K12:Oxidation or Hydroxylation:0.00
Sample 2	2	7	Uncharacterized protein OS=Gallus gallus GN=AHSG PE=4 SV=1	tr|E1BZE1|E1BZE1_CHICK	K.VPHPVGFVPPPPLC(+57.02)PGK.I	Y	24.85	1793.96	17	0.8	598.996	3	22.68		F8:388	1	322	338	Carbamidomethylation	C14:Carbamidomethylation:1000.00
Sample 2	15	15	Cystatin OS=Gallus gallus PE=1 SV=2	P01038|CYT_CHICK	R.LLGAPVPVDENDEGLQR.A	Y	47.12	1820.93	17	0.9	911.471	2	22.88		F8:395	4	30	46
Sample 2	15	16	Uncharacterized protein OS=Gallus gallus GN=CST3 PE=4 SV=1	tr|R4GLT1|R4GLT1_CHICK	R.LLGAPVPVDENDEGLQR.A	Y	47.12	1820.93	17	0.9	911.471	2	22.88		F8:395	4	42	58
Sample 2	10	13	Uncharacterized protein OS=Gallus gallus GN=DMP1 PE=4 SV=2	tr|F1NUV7|F1NUV7_CHICK	D.PSVFDSLGGR.H	Y	37.61	1033.52	10	0.7	517.767	2	22.98		F8:398	2	173	182
Sample 2	5	2	Serum albumin OS=Gallus gallus GN=ALB PE=4 SV=2	tr|F2Z4L6|F2Z4L6_CHICK	K.VSQPDFVQPYQRPASDVIC(+57.02)QEYQDNR.V	N	42.5	3138.45	26	1.5	1047.16	3	23.01		F8:399	2	84	109	Carbamidomethylation	C19:Carbamidomethylation:1000.00
Sample 2	6	3	Serum albumin OS=Gallus gallus GN=ALB PE=1 SV=2	P19121|ALBU_CHICK	K.VSQPDFVQPYQRPASDVIC(+57.02)QEYQDNR.V	N	42.5	3138.45	26	1.5	1047.16	3	23.01		F8:399	2	134	159	Carbamidomethylation	C19:Carbamidomethylation:1000.00
Sample 2	1	1	Collagen alpha-2(I) chain OS=Gallus gallus GN=COL1A2 PE=4 SV=1	tr|F1P0H9|F1P0H9_CHICK	R.GLP(+15.99)GIAGATGEP(+15.99)GPLGVSGP(+15.99)PGAR.G	Y	43.29	2132.09	24	1.3	711.704	3	23.15		F8:403	3	882	905	Oxidation or Hydroxylation	P3:Oxidation or Hydroxylation:132.83;P12:Oxidation or Hydroxylation:22.85;P20:Oxidation or Hydroxylation:0.00
Sample 2	10	13	Uncharacterized protein OS=Gallus gallus GN=DMP1 PE=4 SV=2	tr|F1NUV7|F1NUV7_CHICK	R.LHASMGPWDTGDADVAFGNHVER.D	Y	50.44	2481.11	23	1	828.046	3	23.21		F8:405	4	53	75
Sample 2	23	50	Lysozyme OS=Gallus gallus GN=LYZ PE=3 SV=1	tr|B8YK79|B8YK79_CHICK	R.NTDGSTDYGILQINSR.W	Y	42.91	1752.83	16	0.1	877.421	2	23.54		F8:415	2	64	79
Sample 2	23	51	Lysozyme C OS=Gallus gallus GN=LYZ PE=1 SV=1	P00698|LYSC_CHICK	R.NTDGSTDYGILQINSR.W	Y	42.91	1752.83	16	0.1	877.421	2	23.54		F8:415	2	64	79
Sample 2	9	25	Matrix Gla protein OS=Gallus gallus GN=MGP PE=2 SV=1	O42413|MGP_CHICK	C.YES(+60.00)HESMESHEYLNPFLNR.Q	Y	19.26	2441.04	19	-6.7	611.264	4	23.58		F8:416	1	20	38	2-OH-ethyl thio-Ser	S3:2-OH-ethyl thio-Ser:0.00
Sample 2	3	6	Apolipoprotein A-I OS=Gallus gallus GN=APOA1 PE=1 SV=2	P08250|APOA1_CHICK	K.MTPLVQEFR.E	Y	39.38	1119.57	9	1	560.795	2	23.73		F8:421	2	230	238
Sample 2	15	15	Cystatin OS=Gallus gallus PE=1 SV=2	P01038|CYT_CHICK	R.ALQFAMAEYNR.A	Y	13.56	1312.62	11	0.2	657.319	2	23.76		F8:422	1	47	57
Sample 2	15	16	Uncharacterized protein OS=Gallus gallus GN=CST3 PE=4 SV=1	tr|R4GLT1|R4GLT1_CHICK	R.ALQFAMAEYNR.A	Y	13.56	1312.62	11	0.2	657.319	2	23.76		F8:422	1	59	69
Sample 2	11	10	Decorin OS=Gallus gallus GN=DCN PE=1 SV=1	P28675|PGS2_CHICK	K.ISPAAFAPLK.K	Y	39.62	1013.59	10	0.5	507.803	2	23.81		F8:424	2	118	127
Sample 2	11	11	Decorin OS=Gallus gallus GN=DCN PE=4 SV=2	tr|E1BRE9|E1BRE9_CHICK	K.ISPAAFAPLK.K	Y	39.62	1013.59	10	0.5	507.803	2	23.81		F8:424	2	118	127
Sample 2	10	13	Uncharacterized protein OS=Gallus gallus GN=DMP1 PE=4 SV=2	tr|F1NUV7|F1NUV7_CHICK	G.DDPSVFDSLGGR.H	Y	47.81	1263.57	12	0.8	632.794	2	23.97		F8:429	4	171	182
Sample 2	9	25	Matrix Gla protein OS=Gallus gallus GN=MGP PE=2 SV=1	O42413|MGP_CHICK	R.QRE(+43.99)IC(+57.02)EDFHLC(+57.02)EQYALNHGYPAAYR.H	Y	39.26	3183.39	25	1	796.856	4	23.99		F8:430	1	70	94	Carboxylation (E); Carbamidomethylation	E3:Carboxylation (E):5.77;C5:Carbamidomethylation:1000.00;C11:Carbamidomethylation:1000.00
Sample 2	10	13	Uncharacterized protein OS=Gallus gallus GN=DMP1 PE=4 SV=2	tr|F1NUV7|F1NUV7_CHICK	G.DDPSVF(+31.99)DSLGGR.H	Y	21.36	1295.56	12	1	648.789	2	24.16		F8:436	1	171	182	Dihydroxy	F6:Dihydroxy:22.69
Sample 2	5	2	Serum albumin OS=Gallus gallus GN=ALB PE=4 SV=2	tr|F2Z4L6|F2Z4L6_CHICK	K.QQYFC(+57.02)GILK.Q	N	34.29	1155.57	9	0.6	578.795	2	24.3		F8:441	2	174	182	Carbamidomethylation	C5:Carbamidomethylation:1000.00
Sample 2	6	3	Serum albumin OS=Gallus gallus GN=ALB PE=1 SV=2	P19121|ALBU_CHICK	K.QQYFC(+57.02)GILK.Q	N	34.29	1155.57	9	0.6	578.795	2	24.3		F8:441	2	224	232	Carbamidomethylation	C5:Carbamidomethylation:1000.00
Sample 2	2	7	Uncharacterized protein OS=Gallus gallus GN=AHSG PE=4 SV=1	tr|E1BZE1|E1BZE1_CHICK	K.M(+15.99)VTEPSQDLIAEC(+57.02)QLYGHQPGVTYPHPGQDTSAGLVPSAGQGFTNHNLK.I	Y	21.31	5262.48	49	1	878.088	6	24.33	14200000	F8:442	2	235	283	Oxidation (M); Carbamidomethylation	M1:Oxidation (M):1000.00;C13:Carbamidomethylation:1000.00
Sample 2	27	76	Gallinacin-7 (Fragment) OS=Gallus gallus PE=4 SV=1	tr|E1AFV0|E1AFV0_CHICK	R.NGIC(+57.02)FPGIC(+57.02)R.R	Y	45.92	1192.55	10	1	597.282	2	24.4	13200000	F8:444	1	29	38	Carbamidomethylation	C4:Carbamidomethylation:1000.00;C9:Carbamidomethylation:1000.00
Sample 2	27	77	Gallinacin-7 OS=Gallus gallus GN=GAL7 PE=2 SV=1	Q6QLR2|GLL7_CHICK	R.NGIC(+57.02)FPGIC(+57.02)R.R	Y	45.92	1192.55	10	1	597.282	2	24.4	13200000	F8:444	1	35	44	Carbamidomethylation	C4:Carbamidomethylation:1000.00;C9:Carbamidomethylation:1000.00
Sample 2	2	7	Uncharacterized protein OS=Gallus gallus GN=AHSG PE=4 SV=1	tr|E1BZE1|E1BZE1_CHICK	K.MVTEPSQDLIAEC(+57.02)QLYGHQPGVTYPHPGQDTSAGLVPSAGQGFTNHNLK.I	Y	38.65	5246.48	49	0.1	875.421	6	24.57		F8:450	3	235	283	Carbamidomethylation	C13:Carbamidomethylation:1000.00
Sample 2	9	25	Matrix Gla protein OS=Gallus gallus GN=MGP PE=2 SV=1	O42413|MGP_CHICK	C.YE(+43.99)SHESMESHEYLNPFLNR.Q	Y	37.12	2425.03	19	0.6	607.265	4	24.68	9610000	F8:454	3	20	38	Carboxylation (E)	E2:Carboxylation (E):0.00
Sample 2	25	38	Gremlin-1 OS=Gallus gallus GN=GREM1 PE=2 SV=1	O73755|GREM1_CHICK	R.FC(+57.02)YGQC(+57.02)NSFYIPR.H	Y	50.91	1710.73	13	1.1	856.372	2	25.08		F8:467	2	117	129	Carbamidomethylation	C2:Carbamidomethylation:1000.00;C6:Carbamidomethylation:1000.00
Sample 2	15	15	Cystatin OS=Gallus gallus PE=1 SV=2	P01038|CYT_CHICK	K.YILQVEIGR.T	Y	24.36	1089.62	9	-0.2	545.816	2	25.32		F8:471	3	83	91
Sample 2	15	16	Uncharacterized protein OS=Gallus gallus GN=CST3 PE=4 SV=1	tr|R4GLT1|R4GLT1_CHICK	K.YILQVEIGR.T	Y	24.36	1089.62	9	-0.2	545.816	2	25.32		F8:471	3	95	103
Sample 2	3	6	Apolipoprotein A-I OS=Gallus gallus GN=APOA1 PE=1 SV=2	P08250|APOA1_CHICK	R.LTPVAQELKELTK.Q	Y	43.91	1468.85	13	0.7	735.433	2	25.45		F8:475	3	142	154
Sample 2	2	7	Uncharacterized protein OS=Gallus gallus GN=AHSG PE=4 SV=1	tr|E1BZE1|E1BZE1_CHICK	K.ISHNNPVAS(+79.97)ESSSSEFPSLLSAK.S	Y	42.15	2467.13	23	1	823.384	3	25.48		F8:476	1	284	306	Phosphorylation (STY)	S9:Phosphorylation (STY):0.00
Sample 2	9	25	Matrix Gla protein OS=Gallus gallus GN=MGP PE=2 SV=1	O42413|MGP_CHICK	R.QREI(+88.00)C(+57.02)EDFHLC(+57.02)EQYALNHGYPAAYR.H	Y	46.67	3227.4	25	-5.5	646.484	5	25.51		F8:477	2	70	94	3-sulfanylpropanoyl; Carbamidomethylation	I4:3-sulfanylpropanoyl:0.00;C5:Carbamidomethylation:1000.00;C11:Carbamidomethylation:1000.00
Sample 2	5	2	Serum albumin OS=Gallus gallus GN=ALB PE=4 SV=2	tr|F2Z4L6|F2Z4L6_CHICK	K.QSDINTC(+57.02)FGEEGANLIVQSR.A	N	40.55	2237.04	20	1	1119.53	2	25.75		F8:484	6	539	558	Carbamidomethylation	C7:Carbamidomethylation:1000.00
Sample 2	6	3	Serum albumin OS=Gallus gallus GN=ALB PE=1 SV=2	P19121|ALBU_CHICK	K.QSDINTC(+57.02)FGEEGANLIVQSR.A	N	40.55	2237.04	20	1	1119.53	2	25.75		F8:484	6	589	608	Carbamidomethylation	C7:Carbamidomethylation:1000.00
Sample 2	12	37	Osteocalcin OS=Gallus gallus GN=BGLAP PE=1 SV=2	P02822|OSTCN_CHICK	R.EVC(+57.02)ELSPDC(+57.02)DELADQIGFQEAYRR.F	Y	31.66	2899.28	24	1.6	967.434	3	25.87		F8:488	4	69	92	Carbamidomethylation	C3:Carbamidomethylation:1000.00;C9:Carbamidomethylation:1000.00
Sample 2	23	50	Lysozyme OS=Gallus gallus GN=LYZ PE=3 SV=1	tr|B8YK79|B8YK79_CHICK	R.GYSLGNWVC(+57.02)AAK.F	Y	44.96	1324.62	12	0.3	663.319	2	25.9		F8:489	1	40	51	Carbamidomethylation	C9:Carbamidomethylation:1000.00
Sample 2	23	51	Lysozyme C OS=Gallus gallus GN=LYZ PE=1 SV=1	P00698|LYSC_CHICK	R.GYSLGNWVC(+57.02)AAK.F	Y	44.96	1324.62	12	0.3	663.319	2	25.9		F8:489	1	40	51	Carbamidomethylation	C9:Carbamidomethylation:1000.00
Sample 2	29	54	Leukocyte ribonuclease A-2 OS=Gallus gallus PE=2 SV=1	tr|Q27J90|Q27J90_CHICK	G.VPTYQDFLYK.H	Y	41.11	1272.64	10	0.7	637.327	2	26.02		F8:492	2	24	33
Sample 2	29	55	Ribonuclease homolog OS=Gallus gallus PE=2 SV=1	P30374|RSFR_CHICK	G.VPTYQDFLYK.H	Y	41.11	1272.64	10	0.7	637.327	2	26.02		F8:492	2	24	33
Sample 2	11	10	Decorin OS=Gallus gallus GN=DCN PE=1 SV=1	P28675|PGS2_CHICK	K.DLPPDTTLLDLQNNK.I	Y	39.94	1695.87	15	1.5	848.942	2	26.12		F8:495	2	76	90
Sample 2	11	11	Decorin OS=Gallus gallus GN=DCN PE=4 SV=2	tr|E1BRE9|E1BRE9_CHICK	K.DLPPDTTLLDLQNNK.I	Y	39.94	1695.87	15	1.5	848.942	2	26.12		F8:495	2	76	90
Sample 2	11	10	Decorin OS=Gallus gallus GN=DCN PE=1 SV=1	P28675|PGS2_CHICK	K.IDAEGLSGLTNLAK.L	Y	48.2	1400.75	14	0.5	701.383	2	26.38		F8:501	2	234	247
Sample 2	11	11	Decorin OS=Gallus gallus GN=DCN PE=4 SV=2	tr|E1BRE9|E1BRE9_CHICK	K.IDAEGLSGLTNLAK.L	Y	48.2	1400.75	14	0.5	701.383	2	26.38		F8:501	2	234	247
Sample 2	14	12	Uncharacterized protein OS=Gallus gallus GN=LCN8 PE=3 SV=2	tr|E1C0K1|E1C0K1_CHICK	R.EVSPTAMAIFR.K	Y	44.84	1220.62	11	0.8	611.319	2	26.57		F8:507	2	141	151
Sample 2	14	14	Extracellular fatty acid-binding protein OS=Gallus gallus GN=EXFABP PE=1 SV=2	P21760|EXFAB_CHICK	R.EVSPTAMAIFR.K	Y	44.84	1220.62	11	0.8	611.319	2	26.57		F8:507	2	141	151
Sample 2	5	2	Serum albumin OS=Gallus gallus GN=ALB PE=4 SV=2	tr|F2Z4L6|F2Z4L6_CHICK	R.SQC(+57.02)IMEAEFDEKPADLPSLVEK.Y	N	46.43	2535.19	22	0.7	846.07	3	26.69		F8:511	2	265	286	Carbamidomethylation	C3:Carbamidomethylation:1000.00
Sample 2	6	3	Serum albumin OS=Gallus gallus GN=ALB PE=1 SV=2	P19121|ALBU_CHICK	R.SQC(+57.02)IMEAEFDEKPADLPSLVEK.Y	N	46.43	2535.19	22	0.7	846.07	3	26.69		F8:511	2	315	336	Carbamidomethylation	C3:Carbamidomethylation:1000.00
Sample 2	24	26	Secreted phosphoprotein 24 OS=Gallus gallus GN=SPP2 PE=4 SV=1	tr|F1P4U3|F1P4U3_CHICK	R.INSQTWGPNLYGVVR.S	Y	45.92	1702.88	15	1.2	852.448	2	26.72		F8:512	2	51	65
Sample 2	24	27	Secreted phosphoprotein 24 OS=Gallus gallus GN=SPP2 PE=2 SV=1	Q710A0|SPP24_CHICK	R.INSQTWGPNLYGVVR.S	Y	45.92	1702.88	15	1.2	852.448	2	26.72		F8:512	2	51	65
Sample 2	1	1	Collagen alpha-2(I) chain OS=Gallus gallus GN=COL1A2 PE=4 SV=1	tr|F1P0H9|F1P0H9_CHICK	K.AADFGPGPMGLMGPR.G	Y	48.29	1472.69	15	1.2	737.353	2	27		F8:520	2	84	98
Sample 2	7	8	SPARC OS=Gallus gallus GN=SPARC PE=4 SV=1	tr|F1P291|F1P291_CHICK	K.NVLITLYERDEDNNLLTEK.Q	N	41.2	2291.16	19	0.7	1146.59	2	27.49		F8:530	6	168	186
Sample 2	8	9	SPARC OS=Gallus gallus GN=SPARC PE=2 SV=1	P36377|SPRC_CHICK	K.NVLITLYERDEDNNLLTEK.Q	N	41.2	2291.16	19	0.7	1146.59	2	27.49		F8:530	6	168	186
Sample 2	2	7	Uncharacterized protein OS=Gallus gallus GN=AHSG PE=4 SV=1	tr|E1BZE1|E1BZE1_CHICK	K.DNLAAC(+57.02)QLLPEDQSNFGFC(+57.02)TAK.M	Y	31.31	2498.12	22	0.5	833.715	3	27.82		F8:537	2	213	234	Carbamidomethylation	C6:Carbamidomethylation:1000.00;C19:Carbamidomethylation:1000.00
Sample 2	11	10	Decorin OS=Gallus gallus GN=DCN PE=1 SV=1	P28675|PGS2_CHICK	K.IASIGINDFC(+57.02)PLGYNTK.K	Y	46.57	1881.93	17	1.2	941.973	2	28.57		F8:557	3	302	318	Carbamidomethylation	C10:Carbamidomethylation:1000.00
Sample 2	11	11	Decorin OS=Gallus gallus GN=DCN PE=4 SV=2	tr|E1BRE9|E1BRE9_CHICK	K.IASIGINDFC(+57.02)PLGYNTK.K	Y	46.57	1881.93	17	1.2	941.973	2	28.57		F8:557	3	302	318	Carbamidomethylation	C10:Carbamidomethylation:1000.00
Sample 2	5	2	Serum albumin OS=Gallus gallus GN=ALB PE=4 SV=2	tr|F2Z4L6|F2Z4L6_CHICK	K.YVPPPFNPDMF(+15.99)SFDEK.L	N	27.51	1944.86	16	1.3	973.439	2	29.24		F8:575	2	475	490	Oxidation or Hydroxylation	F11:Oxidation or Hydroxylation:9.42
Sample 2	6	3	Serum albumin OS=Gallus gallus GN=ALB PE=1 SV=2	P19121|ALBU_CHICK	K.YVPPPFNPDMF(+15.99)SFDEK.L	N	27.51	1944.86	16	1.3	973.439	2	29.24		F8:575	2	525	540	Oxidation or Hydroxylation	F11:Oxidation or Hydroxylation:9.42
Sample 2	3	6	Apolipoprotein A-I OS=Gallus gallus GN=APOA1 PE=1 SV=2	P08250|APOA1_CHICK	K.MTPLVQEF.R	Y	15.25	963.473	8	2	964.483	1	29.47		F8:578	1	230	237
Sample 2	13	39	Histone H2B 8 OS=Gallus gallus GN=H2B-VIII PE=1 SV=3	Q9PSW9|H2B8_CHICK	K.AM(+15.99)GIM(+15.99)NSFVNDIFER.I	Y	38.55	1774.8	15	1.2	888.409	2	29.82		F8:584	1	59	73	Oxidation (M)	M2:Oxidation (M):1000.00;M5:Oxidation (M):1000.00
Sample 2	13	40	Histone H2B 5 OS=Gallus gallus GN=H2B-V PE=1 SV=2	P0C1H4|H2B5_CHICK	K.AM(+15.99)GIM(+15.99)NSFVNDIFER.I	Y	38.55	1774.8	15	1.2	888.409	2	29.82		F8:584	1	59	73	Oxidation (M)	M2:Oxidation (M):1000.00;M5:Oxidation (M):1000.00
Sample 2	13	41	Histone H2B 1/2/3/4/6 OS=Gallus gallus GN=H2B-I PE=1 SV=2	P0C1H3|H2B1_CHICK	K.AM(+15.99)GIM(+15.99)NSFVNDIFER.I	Y	38.55	1774.8	15	1.2	888.409	2	29.82		F8:584	1	59	73	Oxidation (M)	M2:Oxidation (M):1000.00;M5:Oxidation (M):1000.00
Sample 2	13	42	Histone H2B (Fragment) OS=Gallus gallus GN=HIST1H2B5L PE=3 SV=1	tr|A0A0A0MQ64|A0A0A0MQ64_CHICK	K.AM(+15.99)GIM(+15.99)NSFVNDIFER.I	Y	38.55	1774.8	15	1.2	888.409	2	29.82		F8:584	1	76	90	Oxidation (M)	M2:Oxidation (M):1000.00;M5:Oxidation (M):1000.00
Sample 2	5	2	Serum albumin OS=Gallus gallus GN=ALB PE=4 SV=2	tr|F2Z4L6|F2Z4L6_CHICK	R.VSFLGHFIYSVAR.R	N	41.68	1494.8	13	0.9	748.407	2	29.85		F8:585	4	110	122
Sample 2	6	3	Serum albumin OS=Gallus gallus GN=ALB PE=1 SV=2	P19121|ALBU_CHICK	R.VSFLGHFIYSVAR.R	N	41.68	1494.8	13	0.9	748.407	2	29.85		F8:585	4	160	172
Sample 2	21	20	Vitronectin OS=Gallus gallus PE=2 SV=1	tr|O12945|O12945_CHICK	R.DISEGFEGIPNDIDAAFALPAHSYHGNER.V	Y	43.7	3141.44	29	0.1	786.368	4	31.07		F8:601	1	240	268
Sample 2	21	21	Uncharacterized protein OS=Gallus gallus GN=VTN PE=4 SV=2	tr|E1C7A7|E1C7A7_CHICK	R.DISEGFEGIPNDIDAAFALPAHSYHGNER.V	Y	43.7	3141.44	29	0.1	786.368	4	31.07		F8:601	1	240	268
Sample 2	2	7	Uncharacterized protein OS=Gallus gallus GN=AHSG PE=4 SV=1	tr|E1BZE1|E1BZE1_CHICK	A.APAAPPPPLGC(+57.02)DDPEIEAAAEFAVIYIN(+.98)GHSHHGYR.F	Y	65.31	3839.8	36	1.5	768.968	5	31.77		F8:610	6	19	54	Carbamidomethylation; Deamidation (NQ)	C11:Carbamidomethylation:1000.00;N28:Deamidation (NQ):1000.00
Sample 2	22	19	Uncharacterized protein OS=Gallus gallus GN=SERPINF1 PE=3 SV=1	tr|E1C7H6|E1C7H6_CHICK	R.LTFPIEYHVDRPFLLVLR.D	Y	27.02	2227.25	18	0.4	557.82	4	31.8		F8:611	2	385	402
Sample 2	5	2	Serum albumin OS=Gallus gallus GN=ALB PE=4 SV=2	tr|F2Z4L6|F2Z4L6_CHICK	K.YVPPPFNPDMFSFDEK.L	N	44.67	1928.87	16	1.1	643.963	3	31.87		F8:613	4	475	490
Sample 2	6	3	Serum albumin OS=Gallus gallus GN=ALB PE=1 SV=2	P19121|ALBU_CHICK	K.YVPPPFNPDMFSFDEK.L	N	44.67	1928.87	16	1.1	643.963	3	31.87		F8:613	4	525	540
Sample 2	7	8	SPARC OS=Gallus gallus GN=SPARC PE=4 SV=1	tr|F1P291|F1P291_CHICK	K.FIPAC(+57.02)LDTELTEFPLR.M	N	55.34	1920.97	16	1.1	961.491	2	32.58		F8:627	8	146	161	Carbamidomethylation	C5:Carbamidomethylation:1000.00
Sample 2	8	9	SPARC OS=Gallus gallus GN=SPARC PE=2 SV=1	P36377|SPRC_CHICK	K.FIPAC(+57.02)LDTELTEFPLR.M	N	55.34	1920.97	16	1.1	961.491	2	32.58		F8:627	8	146	161	Carbamidomethylation	C5:Carbamidomethylation:1000.00
Sample 2	2	7	Uncharacterized protein OS=Gallus gallus GN=AHSG PE=4 SV=1	tr|E1BZE1|E1BZE1_CHICK	K.NPDVYLM(+15.99)LLEIGR.A	Y	47.1	1547.8	13	0.6	774.909	2	32.6		F8:628	5	172	184	Oxidation (M)	M7:Oxidation (M):1000.00
Sample 2	36	619	Uncharacterized protein OS=Gallus gallus GN=SERPINF2 PE=3 SV=2	tr|F1NAR5|F1NAR5_CHICK	R.YPLSWFTLESQDIQVAK.F	Y	40.35	2024.03	17	1.3	1013.02	2	32.71		F8:632	1	272	288
Sample 2	16	28	Histone H2A-III OS=Gallus gallus PE=1 SV=2	P35062|H2A3_CHICK	K.VTIAQGGVLPNIQAVLLPK.K	Y	48.85	1930.16	19	1.1	966.089	2	32.91		F8:637	5	101	119
Sample 2	16	29	Histone H2A-IV OS=Gallus gallus PE=1 SV=2	P02263|H2A4_CHICK	K.VTIAQGGVLPNIQAVLLPK.K	Y	48.85	1930.16	19	1.1	966.089	2	32.91		F8:637	5	101	119
Sample 2	16	30	Histone H2A OS=Gallus gallus GN=H2A-VI PE=3 SV=2	tr|Q92069|Q92069_CHICK	K.VTIAQGGVLPNIQAVLLPK.K	Y	48.85	1930.16	19	1.1	966.089	2	32.91		F8:637	5	101	119
Sample 2	16	31	Histone H2A.J OS=Gallus gallus GN=H2A-IX PE=3 SV=1	P70082|H2AJ_CHICK	K.VTIAQGGVLPNIQAVLLPK.K	Y	48.85	1930.16	19	1.1	966.089	2	32.91		F8:637	5	101	119
Sample 2	16	32	Histone H2A (Fragment) OS=Gallus gallus GN=LOC101751709 PE=3 SV=1	tr|R4GJP9|R4GJP9_CHICK	G.VTIAQGGVLPNIQAVLLPK.K	Y	48.85	1930.16	19	1.1	966.089	2	32.91		F8:637	5	101	119
Sample 2	16	33	Histone H2A OS=Gallus gallus GN=H2AFX PE=3 SV=1	tr|R4GJN7|R4GJN7_CHICK	G.VTIAQGGVLPNIQAVLLPK.K	Y	48.85	1930.16	19	1.1	966.089	2	32.91		F8:637	5	101	119
Sample 2	19	617	Uncharacterized protein OS=Gallus gallus GN=KNG1 PE=4 SV=2	tr|E1BX43|E1BX43_CHICK	K.IVPVQPLIPFTQGIC(+57.02)LGC(+57.02)FHTISTDNSQVAEILKK.A	Y	29.46	3923.07	35	2.2	981.777	4	33.06		F8:642	2	128	162	Carbamidomethylation	C15:Carbamidomethylation:1000.00;C18:Carbamidomethylation:1000.00
Sample 2	2	7	Uncharacterized protein OS=Gallus gallus GN=AHSG PE=4 SV=1	tr|E1BZE1|E1BZE1_CHICK	A.APAAPPPPLGC(+57.02)DDPEIEAAAEFAVIYINGHSHHGYR.F	Y	49.87	3838.82	36	0.6	768.771	5	33.15		F8:645	3	19	54	Carbamidomethylation	C11:Carbamidomethylation:1000.00
Sample 2	32	56	12K serum protein beta-2-m cross-reactive (Fragment) OS=Gallus gallus PE=1 SV=1	tr|Q7LZS1|Q7LZS1_CHICK	K.GC(+57.02)MLDGVLYPFGEIPR.T	Y	40.37	1822.87	16	1.6	912.446	2	33.21		F8:647	2	15	30	Carbamidomethylation	C2:Carbamidomethylation:1000.00
Sample 2	2	7	Uncharacterized protein OS=Gallus gallus GN=AHSG PE=4 SV=1	tr|E1BZE1|E1BZE1_CHICK	P.AAPPPPLGC(+57.02)DDPEIEAAAEFAVIYINGHSHHGYR.F	Y	39.77	3670.73	34	2.2	735.154	5	33.3		F8:649	1	21	54	Carbamidomethylation	C9:Carbamidomethylation:1000.00
Sample 2	2	7	Uncharacterized protein OS=Gallus gallus GN=AHSG PE=4 SV=1	tr|E1BZE1|E1BZE1_CHICK	A.PAAPPPPLGC(+57.02)DDPEIEAAAEFAVIYINGHSHHGYR.F	Y	28.16	3767.78	35	-0.5	754.563	5	33.37		F8:651	1	20	54	Carbamidomethylation	C10:Carbamidomethylation:1000.00
Sample 2	30	45	Hemoglobin subunit alpha-A OS=Gallus gallus GN=HBAA PE=1 SV=2	P01994|HBA_CHICK	K.VVAALIEAANHIDDIAGTLSK.L	Y	48.54	2120.15	21	1.3	707.724	3	33.55		F8:657	2	63	83
Sample 2	2	7	Uncharacterized protein OS=Gallus gallus GN=AHSG PE=4 SV=1	tr|E1BZE1|E1BZE1_CHICK	A.PAAPPPPLGC(+57.02)DDPEIEAAAEFAVIYIN(+.98)GHSHHGYR.F	Y	38.26	3768.76	35	6	754.764	5	33.58		F8:658	1	20	54	Carbamidomethylation; Deamidation (NQ)	C10:Carbamidomethylation:1000.00;N27:Deamidation (NQ):1000.00
Sample 2	13	39	Histone H2B 8 OS=Gallus gallus GN=H2B-VIII PE=1 SV=3	Q9PSW9|H2B8_CHICK	K.AM(+15.99)GIMNSFVNDIFER.I	Y	51.47	1758.81	15	0.5	880.411	2	33.93		F8:667	4	59	73	Oxidation (M)	M2:Oxidation (M):38.16
Sample 2	13	40	Histone H2B 5 OS=Gallus gallus GN=H2B-V PE=1 SV=2	P0C1H4|H2B5_CHICK	K.AM(+15.99)GIMNSFVNDIFER.I	Y	51.47	1758.81	15	0.5	880.411	2	33.93		F8:667	4	59	73	Oxidation (M)	M2:Oxidation (M):38.16
Sample 2	13	41	Histone H2B 1/2/3/4/6 OS=Gallus gallus GN=H2B-I PE=1 SV=2	P0C1H3|H2B1_CHICK	K.AM(+15.99)GIMNSFVNDIFER.I	Y	51.47	1758.81	15	0.5	880.411	2	33.93		F8:667	4	59	73	Oxidation (M)	M2:Oxidation (M):38.16
Sample 2	13	42	Histone H2B (Fragment) OS=Gallus gallus GN=HIST1H2B5L PE=3 SV=1	tr|A0A0A0MQ64|A0A0A0MQ64_CHICK	K.AM(+15.99)GIMNSFVNDIFER.I	Y	51.47	1758.81	15	0.5	880.411	2	33.93		F8:667	4	76	90	Oxidation (M)	M2:Oxidation (M):38.16
Sample 2	31	620	Uncharacterized protein OS=Gallus gallus GN=LYG2 PE=4 SV=1	tr|F1P5H6|F1P5H6_CHICK	R.VGEALC(+57.02)IEPAVIAGIISR.E	Y	46.16	1867.02	18	1.6	934.521	2	34.24		F8:672	2	81	98	Carbamidomethylation	C6:Carbamidomethylation:1000.00
Sample 2	31	621	Lysozyme g OS=Gallus gallus PE=2 SV=1	P27042|LYG_CHICK	R.VGEALC(+57.02)IEPAVIAGIISR.E	Y	46.16	1867.02	18	1.6	934.521	2	34.24		F8:672	2	81	98	Carbamidomethylation	C6:Carbamidomethylation:1000.00
Sample 2	34	72	Coagulation factor IX OS=Gallus gallus GN=F9 PE=2 SV=1	Q804X6|FA9_CHICK	R.SAIVLQVLTVPFVDR.V	Y	37.74	1655.96	15	0.9	828.989	2	34.93		F8:683	2	375	389
Sample 2	34	73	Coagulation factor IX OS=Gallus gallus GN=F9 PE=3 SV=1	tr|F1NWP1|F1NWP1_CHICK	R.SAIVLQVLTVPFVDR.V	Y	37.74	1655.96	15	0.9	828.989	2	34.93		F8:683	2	375	389
Sample 2	19	617	Uncharacterized protein OS=Gallus gallus GN=KNG1 PE=4 SV=2	tr|E1BX43|E1BX43_CHICK	K.IVPVQPLIPFTQGIC(+57.02)LGC(+57.02)FHTISTDNSQVAEILK.K	Y	17	3794.97	34	1.8	949.752	4	35.01		F8:685	2	128	161	Carbamidomethylation	C15:Carbamidomethylation:1000.00;C18:Carbamidomethylation:1000.00
Sample 2	2	7	Uncharacterized protein OS=Gallus gallus GN=AHSG PE=4 SV=1	tr|E1BZE1|E1BZE1_CHICK	K.NPDVYLMLLEIGR.A	Y	48.17	1531.81	13	0.6	766.911	2	35.34		F8:690	7	172	184
Sample 2	11	10	Decorin OS=Gallus gallus GN=DCN PE=1 SV=1	P28675|PGS2_CHICK	K.ATYSGVSLFSNPVQYWEIQPSAFR.C	Y	46.5	2746.34	24	-0.4	916.453	3	35.51		F8:696	3	320	343
Sample 2	11	11	Decorin OS=Gallus gallus GN=DCN PE=4 SV=2	tr|E1BRE9|E1BRE9_CHICK	K.ATYSGVSLFSNPVQYWEIQPSAFR.C	Y	46.5	2746.34	24	-0.4	916.453	3	35.51		F8:696	3	320	343
Sample 2	13	39	Histone H2B 8 OS=Gallus gallus GN=H2B-VIII PE=1 SV=3	Q9PSW9|H2B8_CHICK	K.AMGIMNSFVNDIFER.I	Y	53.83	1742.81	15	1.4	872.414	2	35.77		F8:703	4	59	73
Sample 2	13	40	Histone H2B 5 OS=Gallus gallus GN=H2B-V PE=1 SV=2	P0C1H4|H2B5_CHICK	K.AMGIMNSFVNDIFER.I	Y	53.83	1742.81	15	1.4	872.414	2	35.77		F8:703	4	59	73
Sample 2	13	41	Histone H2B 1/2/3/4/6 OS=Gallus gallus GN=H2B-I PE=1 SV=2	P0C1H3|H2B1_CHICK	K.AMGIMNSFVNDIFER.I	Y	53.83	1742.81	15	1.4	872.414	2	35.77		F8:703	4	59	73
Sample 2	13	42	Histone H2B (Fragment) OS=Gallus gallus GN=HIST1H2B5L PE=3 SV=1	tr|A0A0A0MQ64|A0A0A0MQ64_CHICK	K.AMGIMNSFVNDIFER.I	Y	53.83	1742.81	15	1.4	872.414	2	35.77		F8:703	4	76	90
Sample 2	8	9	SPARC OS=Gallus gallus GN=SPARC PE=2 SV=1	P36377|SPRC_CHICK	R.FFEAC(+57.02)DLDFD(+15.99)KYIALEEWASC(+57.02)FGIK.E	Y	17.23	3089.38	25	-9.4	1030.79	3	36.11		F8:711	1	264	288	Carbamidomethylation; Oxidation or Hydroxylation	C5:Carbamidomethylation:1000.00;D10:Oxidation or Hydroxylation:0.00;C21:Carbamidomethylation:1000.00
Sample 2	7	8	SPARC OS=Gallus gallus GN=SPARC PE=4 SV=1	tr|F1P291|F1P291_CHICK	R.FFEAC(+57.02)DLDND(+15.99)KYIALEEWASC(+57.02)FGIK.E	Y	16.49	3056.36	25	0.8	1019.79	3	36.22		F8:713	1	264	288	Carbamidomethylation; Oxidation or Hydroxylation	C5:Carbamidomethylation:1000.00;D10:Oxidation or Hydroxylation:0.00;C21:Carbamidomethylation:1000.00
Sample 2	15	15	Cystatin OS=Gallus gallus PE=1 SV=2	P01038|CYT_CHICK	K.YTTC(+57.02)TFVVYSIPWLNQIK.L	Y	33.22	2232.13	18	1.5	1117.07	2	36.6		F8:720	2	115	132	Carbamidomethylation	C4:Carbamidomethylation:1000.00
Sample 2	15	16	Uncharacterized protein OS=Gallus gallus GN=CST3 PE=4 SV=1	tr|R4GLT1|R4GLT1_CHICK	K.YTTC(+57.02)TFVVYSIPWLNQIK.L	Y	33.22	2232.13	18	1.5	1117.07	2	36.6		F8:720	2	127	144	Carbamidomethylation	C4:Carbamidomethylation:1000.00
Sample 2	14	12	Uncharacterized protein OS=Gallus gallus GN=LCN8 PE=3 SV=2	tr|E1C0K1|E1C0K1_CHICK	K.WYIVALASNTDFFLR.E	Y	53.91	1814.94	15	1.6	908.476	2	37.18		F8:726	4	34	48
Sample 2	14	14	Extracellular fatty acid-binding protein OS=Gallus gallus GN=EXFABP PE=1 SV=2	P21760|EXFAB_CHICK	K.WYIVALASNTDFFLR.E	Y	53.91	1814.94	15	1.6	908.476	2	37.18		F8:726	4	34	48
Sample 2	1	1	Collagen alpha-2(I) chain OS=Gallus gallus GN=COL1A2 PE=4 SV=1	tr|F1P0H9|F1P0H9_CHICK	R.LPILDIAPLDIGGADQEFGLHIGPVC(+57.02)FK	Y	37.84	3004.57	28	1.2	1002.53	3	37.22		F8:727	1	1336	1363	Carbamidomethylation	C26:Carbamidomethylation:1000.00
Sample 2	22	19	Uncharacterized protein OS=Gallus gallus GN=SERPINF1 PE=3 SV=1	tr|E1C7H6|E1C7H6_CHICK	K.IAQLPLTEGVSAMFFLPTK.V	Y	30.16	2062.12	19	2.1	1032.07	2	37.28		F8:728	1	266	284
Sample 2	26	616	Uncharacterized protein OS=Gallus gallus GN=THBS1 PE=4 SV=2	tr|F1P0J8|F1P0J8_CHICK	R.GDDDSVFDIFELTVR.K	Y	43.77	1726.8	15	1	864.411	2	37.35		F8:729	2	27	41
Sample 2	20	35	Lumican OS=Gallus gallus GN=LUM PE=1 SV=1	P51890|LUM_CHICK	K.LPTGLPHSLLMLYFDNNQISNIPDEYFQGFK.T	Y	30.12	3610.78	31	0.8	1204.6	3	37.43		F8:730	2	204	234
Sample 2	33	628	Collagen alpha-1(VI) chain OS=Gallus gallus GN=COL6A1 PE=2 SV=1	P20785|CO6A1_CHICK	R.TPLTSLC(+57.02)EVTPVVSLGIGDIFR.N	Y	39.28	2373.26	22	2.1	1187.64	2	37.95		F8:736	2	738	759	Carbamidomethylation	C7:Carbamidomethylation:1000.00
Sample 2	33	629	Collagen alpha-1(VI) chain OS=Gallus gallus GN=COL6A1 PE=4 SV=2	tr|F1NFE0|F1NFE0_CHICK	R.TPLTSLC(+57.02)EVTPVVSLGIGDIFR.N	Y	39.28	2373.26	22	2.1	1187.64	2	37.95		F8:736	2	738	759	Carbamidomethylation	C7:Carbamidomethylation:1000.00
Sample 2	28	43	Alpha-1 type XI collagen (Fragment) OS=Gallus gallus PE=2 SV=1	tr|Q90796|Q90796_CHICK	K.FGFEVGPVC(+57.02)FLG	Y	46.24	1327.63	12	0.2	664.821	2	38.73		F8:744	2	877	888	Carbamidomethylation	C9:Carbamidomethylation:1000.00
Sample 2	22	19	Uncharacterized protein OS=Gallus gallus GN=SERPINF1 PE=3 SV=1	tr|E1C7H6|E1C7H6_CHICK	R.TATANVLLSPFSLATALSGLSLGAGERTEDVISR.A	Y	17.62	3416.81	34	1.5	1139.95	3	39.56		F8:753	1	71	104
Sample 2	38	44	Serpin H1 OS=Gallus gallus GN=SERPINH1 PE=1 SV=2	P13731|SERPH_CHICK	K.DKNMENILLSPVVVASSLGLVSLGGK.A	Y	32.02	2639.46	26	1.2	880.827	3	39.62		F8:754	1	48	73
Sample 2	36	619	Uncharacterized protein OS=Gallus gallus GN=SERPINF2 PE=3 SV=2	tr|F1NAR5|F1NAR5_CHICK	K.ITLDYQLELNSVLSHMGLQELFISPNLQK.I	Y	13.66	3342.75	29	-0.1	1115.26	3	39.79		F8:756	1	338	366
Sample 2	5	2	Serum albumin OS=Gallus gallus GN=ALB PE=4 SV=2	tr|F2Z4L6|F2Z4L6_CHICK	F.LYAPAILSFAVDFEHALQSC(+57.02)C(+57.02)K.E	N	17.38	2539.22	22	1.4	847.416	3	40.54		F8:763	1	127	148	Carbamidomethylation	C20:Carbamidomethylation:1000.00;C21:Carbamidomethylation:1000.00
Sample 2	6	3	Serum albumin OS=Gallus gallus GN=ALB PE=1 SV=2	P19121|ALBU_CHICK	F.LYAPAILSFAVDFEHALQSC(+57.02)C(+57.02)K.E	N	17.38	2539.22	22	1.4	847.416	3	40.54		F8:763	1	177	198	Carbamidomethylation	C20:Carbamidomethylation:1000.00;C21:Carbamidomethylation:1000.00
Sample 2	4	4	Collagen alpha-1(I) chain OS=Gallus gallus GN=COL1A1 PE=1 SV=3	P02457|CO1A1_CHICK	K.TSRLPIIDLAPMDVGAPDQEFGIDIGPVC(+57.02)FL	Y	22.99	3355.68	31	2.4	1119.57	3	40.63		F8:764	1	1423	1453	Carbamidomethylation	C29:Carbamidomethylation:1000.00
Sample 2	22	19	Uncharacterized protein OS=Gallus gallus GN=SERPINF1 PE=3 SV=1	tr|E1C7H6|E1C7H6_CHICK	R.TATANVLLSPFSLATALSGLSLGAGER.T	Y	32.51	2616.41	27	1	873.145	3	41.49		F8:772	1	71	97
