# Supplementary material for: Bone protein “extractomics”: comparing the efficiency of bone protein extractions of Gallus gallus in tandem mass spectrometry, with an eye towards paleoproteomics
Source: PeerJ. 2016 Oct 27;4:e2603. doi: 10.7717/peerj.2603 (PMC5088622; doi:10.7717/peerj.2603)
Supplement: Table S11 [file peerj-04-2603-s015.xlsx]

## Sheet: Peptides
Table S11. Peptides identified in samples from Method 6, dialyzed EDTA (20 mL/g) (20-EDTA-D) @ 1% FDR
Sample #	Protein Group	Protein ID	Protein Description	Protein Accession	Peptide	Unique	-10lgP	Mass	Length	ppm	m/z	z	RT	Area	Scan	#Spec	Start	End	PTM	AScore
Sample 1	5	4	Collagen alpha-1(I) chain OS=Gallus gallus GN=COL1A1 PE=1 SV=3	P02457|CO1A1_CHICK	L.TGPIGPP(+15.99)GPAGAPGD(+15.99)KGEAGP(+15.99)PGPAGPTGAR.G	Y	34.93	2708.32	31	1.1	903.78	3	14.57		F23:136	1	755	785	Oxidation or Hydroxylation	P7:Oxidation or Hydroxylation:17.01;D15:Oxidation or Hydroxylation:6.59;P21:Oxidation or Hydroxylation:0.00
Sample 1	2	2	Serum albumin OS=Gallus gallus GN=ALB PE=4 SV=2	tr|F2Z4L6|F2Z4L6_CHICK	F.DEKLC(+57.02)SAPAEEREVGQMK.L	Y	28.54	2075.96	18	1.1	692.995	3	15.29		F23:144	1	488	505	Carbamidomethylation	C5:Carbamidomethylation:1000.00
Sample 1	2	3	Serum albumin OS=Gallus gallus GN=ALB PE=1 SV=2	P19121|ALBU_CHICK	F.DEKLC(+57.02)SAPAEEREVGQMK.L	Y	28.54	2075.96	18	1.1	692.995	3	15.29		F23:144	1	538	555	Carbamidomethylation	C5:Carbamidomethylation:1000.00
Sample 1	8	25	Matrix Gla protein OS=Gallus gallus GN=MGP PE=2 SV=1	O42413|MGP_CHICK	Q.RAN(+.98)GFIRDDTGLR.A	Y	39.18	1490.76	13	0.7	497.927	3	15.88		F23:153	1	40	52	Deamidation (NQ)	N3:Deamidation (NQ):1000.00
Sample 1	8	25	Matrix Gla protein OS=Gallus gallus GN=MGP PE=2 SV=1	O42413|MGP_CHICK	G.F(+57.02)IRDDTGLR.A	Y	29.83	1148.59	9	0.8	575.305	2	16.77		F23:165	2	44	52	Carbamidomethylation (DHKE X@N-term)	F1:Carbamidomethylation (DHKE X@N-term):22.45
Sample 1	1	6	Apolipoprotein A-I OS=Gallus gallus GN=APOA1 PE=1 SV=2	P08250|APOA1_CHICK	R.LTPYAENLK.N	Y	22.63	1047.56	9	0.6	524.788	2	17.13		F23:172	1	241	249
Sample 1	4	1	Collagen alpha-2(I) chain OS=Gallus gallus GN=COL1A2 PE=4 SV=1	tr|F1P0H9|F1P0H9_CHICK	Y.C(+57.02)DFATGETC(+57.02)IH.A	Y	27.61	1309.51	11	0.8	655.761	2	17.3		F23:177	1	1190	1200	Carbamidomethylation	C1:Carbamidomethylation:1000.00;C9:Carbamidomethylation:1000.00
Sample 1	5	4	Collagen alpha-1(I) chain OS=Gallus gallus GN=COL1A1 PE=1 SV=3	P02457|CO1A1_CHICK	R.GLTGPIGPPGP(+15.99)AGAPGD(+15.99)KGEAGPP(+15.99)GPAGPTGAR.G	Y	30.61	2878.42	33	1.5	960.482	3	17.65		F23:183	1	753	785	Oxidation or Hydroxylation	P11:Oxidation or Hydroxylation:0.00;D17:Oxidation or Hydroxylation:5.47;P24:Oxidation or Hydroxylation:2.59
Sample 1	2	2	Serum albumin OS=Gallus gallus GN=ALB PE=4 SV=2	tr|F2Z4L6|F2Z4L6_CHICK	K.LVKDVVDLAQK.C	Y	51.62	1226.72	11	0.8	614.369	2	18.18		F23:189	2	19	29
Sample 1	2	3	Serum albumin OS=Gallus gallus GN=ALB PE=1 SV=2	P19121|ALBU_CHICK	K.LVKDVVDLAQK.C	Y	51.62	1226.72	11	0.8	614.369	2	18.18		F23:189	2	69	79
Sample 1	4	1	Collagen alpha-2(I) chain OS=Gallus gallus GN=COL1A2 PE=4 SV=1	tr|F1P0H9|F1P0H9_CHICK	R.GLP(+15.99)GESGAVGPAGPIGSR.G	Y	48.22	1593.81	18	0.8	797.913	2	18.24		F23:191	2	591	608	Oxidation or Hydroxylation	P3:Oxidation or Hydroxylation:112.87
Sample 1	1	6	Apolipoprotein A-I OS=Gallus gallus GN=APOA1 PE=1 SV=2	P08250|APOA1_CHICK	K.WTEELEQYR.Q	Y	43.98	1252.57	9	1.1	627.294	2	20.58		F23:234	1	131	139
Sample 1	1	6	Apolipoprotein A-I OS=Gallus gallus GN=APOA1 PE=1 SV=2	P08250|APOA1_CHICK	R.EM(+15.99)WLKDTEALR.A	Y	44.75	1406.69	11	0.5	704.351	2	20.75		F23:238	1	96	106	Oxidation (M)	M2:Oxidation (M):1000.00
Sample 1	1	6	Apolipoprotein A-I OS=Gallus gallus GN=APOA1 PE=1 SV=2	P08250|APOA1_CHICK	K.W(+15.99)TEELEQYR.Q	Y	39.54	1268.57	9	2.3	635.292	2	20.79		F23:239	1	131	139	Oxidation (HW)	W1:Oxidation (HW):1000.00
Sample 1	1	6	Apolipoprotein A-I OS=Gallus gallus GN=APOA1 PE=1 SV=2	P08250|APOA1_CHICK	K.W(+31.99)TEELEQYR.Q	Y	22.1	1284.56	9	1	643.289	2	20.87		F23:240	1	131	139	Dihydroxy	W1:Dihydroxy:19.61
Sample 1	6	7	Uncharacterized protein OS=Gallus gallus GN=AHSG PE=4 SV=1	tr|E1BZE1|E1BZE1_CHICK	V.GFVPPPPLC(+57.02)PGK.I	Y	23.08	1264.66	12	0.8	633.34	2	21.82		F23:254	2	327	338	Carbamidomethylation	C9:Carbamidomethylation:1000.00
Sample 1	9	26	Secreted phosphoprotein 24 OS=Gallus gallus GN=SPP2 PE=4 SV=1	tr|F1P4U3|F1P4U3_CHICK	S.SEQIVNVIVR.C	Y	43.2	1155.66	10	0.8	578.838	2	22.3		F23:261	2	124	133
Sample 1	9	27	Secreted phosphoprotein 24 OS=Gallus gallus GN=SPP2 PE=2 SV=1	Q710A0|SPP24_CHICK	S.SEQIVNVIVR.C	Y	43.2	1155.66	10	0.8	578.838	2	22.3		F23:261	2	124	133
Sample 1	9	53	GHRG-1 protein OS=Gallus gallus GN=GHRG-1 PE=2 SV=1	tr|Q91982|Q91982_CHICK	S.SEQIVNVIVR.C	Y	43.2	1155.66	10	0.8	578.838	2	22.3		F23:261	2	52	61
Sample 1	2	2	Serum albumin OS=Gallus gallus GN=ALB PE=4 SV=2	tr|F2Z4L6|F2Z4L6_CHICK	K.KMPQVPTDLLLETGKK.M	Y	29.38	1797.01	16	0.9	600.01	3	23		F23:272	1	392	407
Sample 1	2	3	Serum albumin OS=Gallus gallus GN=ALB PE=1 SV=2	P19121|ALBU_CHICK	K.KMPQVPTDLLLETGKK.M	Y	29.38	1797.01	16	0.9	600.01	3	23		F23:272	1	442	457
Sample 1	2	2	Serum albumin OS=Gallus gallus GN=ALB PE=4 SV=2	tr|F2Z4L6|F2Z4L6_CHICK	K.APFSEVSKF.V	Y	28.59	1010.51	9	0.4	506.261	2	23.08		F23:273	1	204	212
Sample 1	2	3	Serum albumin OS=Gallus gallus GN=ALB PE=1 SV=2	P19121|ALBU_CHICK	K.APFSEVSKF.V	Y	28.59	1010.51	9	0.4	506.261	2	23.08		F23:273	1	254	262
Sample 1	2	2	Serum albumin OS=Gallus gallus GN=ALB PE=4 SV=2	tr|F2Z4L6|F2Z4L6_CHICK	K.MPQVPTDLLLETGKK.M	Y	24	1668.91	15	0.7	557.312	3	25.34		F23:310	1	393	407
Sample 1	2	3	Serum albumin OS=Gallus gallus GN=ALB PE=1 SV=2	P19121|ALBU_CHICK	K.MPQVPTDLLLETGKK.M	Y	24	1668.91	15	0.7	557.312	3	25.34		F23:310	1	443	457
Sample 1	7	36	Uncharacterized protein OS=Gallus gallus GN=OMD PE=4 SV=1	tr|R4GF52|R4GF52_CHICK	Q.AEVPHFPFPVEC(+57.02)AR.E	Y	36.79	1654.79	14	0.9	552.605	3	25.41		F23:311	1	50	63	Carbamidomethylation	C12:Carbamidomethylation:1000.00
Sample 1	5	4	Collagen alpha-1(I) chain OS=Gallus gallus GN=COL1A1 PE=1 SV=3	P02457|CO1A1_CHICK	K.SGEYWIDPNQGCNLD(+57.02)AIK.V	Y	18.38	2078.94	18	1.6	1040.48	2	25.78		F23:317	1	1260	1277	Carbamidomethylation (DHKE X@N-term)	D15:Carbamidomethylation (DHKE X@N-term):0.00
Sample 1	3	8	SPARC OS=Gallus gallus GN=SPARC PE=4 SV=1	tr|F1P291|F1P291_CHICK	A.C(+57.02)LDTELTEFPLR.M	Y	31.97	1492.72	12	1.2	747.37	2	27.87		F23:342	1	150	161	Carbamidomethylation	C1:Carbamidomethylation:1000.00
Sample 1	3	9	SPARC OS=Gallus gallus GN=SPARC PE=2 SV=1	P36377|SPRC_CHICK	A.C(+57.02)LDTELTEFPLR.M	Y	31.97	1492.72	12	1.2	747.37	2	27.87		F23:342	1	150	161	Carbamidomethylation	C1:Carbamidomethylation:1000.00
Sample 1	1	6	Apolipoprotein A-I OS=Gallus gallus GN=APOA1 PE=1 SV=2	P08250|APOA1_CHICK	R.LISFLDELQK.S	Y	22.06	1204.67	10	0.8	603.343	2	29.94		F23:369	1	252	261
Sample 1	3	8	SPARC OS=Gallus gallus GN=SPARC PE=4 SV=1	tr|F1P291|F1P291_CHICK	K.NVLITL.Y	Y	22.98	671.422	6	1	672.43	1	29.97		F23:370	1	168	173
Sample 1	3	9	SPARC OS=Gallus gallus GN=SPARC PE=2 SV=1	P36377|SPRC_CHICK	K.NVLITL.Y	Y	22.98	671.422	6	1	672.43	1	29.97		F23:370	1	168	173
Sample 1	11	2923	Uncharacterized protein OS=Gallus gallus GN=CEP170B PE=4 SV=2	tr|F1P5K4|F1P5K4_CHICK	T.AQSGK.A	Y	25.86	489.255	5	8	490.266	1	46.09		F23:523	1	528	532
Sample 1	11	8240	Uncharacterized protein (Fragment) OS=Gallus gallus PE=4 SV=2	tr|F1NKA5|F1NKA5_CHICK	D.AQSGK.R	Y	25.86	489.255	5	8	490.266	1	46.09		F23:523	1	441	445
Sample 1	11	8241	Uncharacterized protein OS=Gallus gallus GN=MMP24 PE=4 SV=2	tr|F1NF49|F1NF49_CHICK	A.AQSGK.A	Y	25.86	489.255	5	8	490.266	1	46.09		F23:523	1	52	56
Sample 1	11	8256	Uncharacterized protein OS=Gallus gallus GN=NID1 PE=4 SV=2	tr|F1NP23|F1NP23_CHICK	F.AQSGK.I	Y	25.86	489.255	5	8	490.266	1	46.09		F23:523	1	953	957
Sample 2	5	4	Collagen alpha-1(I) chain OS=Gallus gallus GN=COL1A1 PE=1 SV=3	P02457|CO1A1_CHICK	R.GLTGPIGPP(+15.99)GPAGAP(+15.99)GDKGEAGPP(+15.99)GPAGPTGAR.G	Y	28.78	2878.42	33	1.9	960.483	3	11.74		F24:117	1	753	785	Oxidation or Hydroxylation	P9:Oxidation or Hydroxylation:0.00;P15:Oxidation or Hydroxylation:6.59;P24:Oxidation or Hydroxylation:6.59
Sample 2	1	6	Apolipoprotein A-I OS=Gallus gallus GN=APOA1 PE=1 SV=2	P08250|APOA1_CHICK	K.LREDM(+15.99)APYYKEVR.E	Y	42.12	1684.82	13	0.8	562.616	3	14.23		F24:135	1	83	95	Oxidation (M)	M5:Oxidation (M):1000.00
Sample 2	1	6	Apolipoprotein A-I OS=Gallus gallus GN=APOA1 PE=1 SV=2	P08250|APOA1_CHICK	R.AELTKDLEEVKEK.I	Y	34.52	1530.81	13	0.8	511.279	3	16.09		F24:153	2	107	119
Sample 2	4	1	Collagen alpha-2(I) chain OS=Gallus gallus GN=COL1A2 PE=4 SV=1	tr|F1P0H9|F1P0H9_CHICK	R.VGP(+15.99)P(+15.99)GPAGITGPP(+15.99)GPP(+15.99)GPAGK.D	Y	32.47	1840.93	21	1.3	921.474	2	16.2		F24:155	1	794	814	Oxidation or Hydroxylation	P3:Oxidation or Hydroxylation:9.42;P4:Oxidation or Hydroxylation:11.10;P13:Oxidation or Hydroxylation:14.02;P16:Oxidation or Hydroxylation:0.00
Sample 2	4	1	Collagen alpha-2(I) chain OS=Gallus gallus GN=COL1A2 PE=4 SV=1	tr|F1P0H9|F1P0H9_CHICK	R.GLP(+15.99)GAIGAP(+15.99)GPAGGAGDRGEGGPAGPAGPAGAR.G	Y	23.93	2724.33	33	1.5	909.12	3	16.24		F24:156	1	675	707	Oxidation or Hydroxylation	P3:Oxidation or Hydroxylation:99.62;P9:Oxidation or Hydroxylation:20.41
Sample 2	5	4	Collagen alpha-1(I) chain OS=Gallus gallus GN=COL1A1 PE=1 SV=3	P02457|CO1A1_CHICK	R.GFP(+15.99)GADGIAGPKGPP(+15.99)GER.G	Y	50.54	1710.83	18	0.9	856.424	2	16.28		F24:157	1	483	500	Oxidation or Hydroxylation	P3:Oxidation or Hydroxylation:14.02;P15:Oxidation or Hydroxylation:0.00
Sample 2	1	6	Apolipoprotein A-I OS=Gallus gallus GN=APOA1 PE=1 SV=2	P08250|APOA1_CHICK	K.LREDMAPYYK.E	Y	38.12	1284.62	10	1.1	643.317	2	16.36		F24:159	1	83	92
Sample 2	10	21	Uncharacterized protein OS=Gallus gallus GN=VTN PE=4 SV=2	tr|E1C7A7|E1C7A7_CHICK	K.RVDLVQPPYPR.S	Y	32.63	1338.74	11	1.4	670.379	2	18.76		F24:198	1	426	436
Sample 2	3	8	SPARC OS=Gallus gallus GN=SPARC PE=4 SV=1	tr|F1P291|F1P291_CHICK	K.LHLDYIGPC(+57.02)K.F	Y	48.42	1214.61	10	0.6	608.313	2	19.37		F24:208	4	136	145	Carbamidomethylation	C9:Carbamidomethylation:1000.00
Sample 2	3	9	SPARC OS=Gallus gallus GN=SPARC PE=2 SV=1	P36377|SPRC_CHICK	K.LHLDYIGPC(+57.02)K.F	Y	48.42	1214.61	10	0.6	608.313	2	19.37		F24:208	4	136	145	Carbamidomethylation	C9:Carbamidomethylation:1000.00
Sample 2	3	8	SPARC OS=Gallus gallus GN=SPARC PE=4 SV=1	tr|F1P291|F1P291_CHICK	K.LHLDY(+31.99)IGPC(+57.02)K.F	Y	35.13	1246.6	10	0.8	624.308	2	19.47		F24:211	1	136	145	Dihydroxy; Carbamidomethylation	Y5:Dihydroxy:28.73;C9:Carbamidomethylation:1000.00
Sample 2	3	9	SPARC OS=Gallus gallus GN=SPARC PE=2 SV=1	P36377|SPRC_CHICK	K.LHLDY(+31.99)IGPC(+57.02)K.F	Y	35.13	1246.6	10	0.8	624.308	2	19.47		F24:211	1	136	145	Dihydroxy; Carbamidomethylation	Y5:Dihydroxy:28.73;C9:Carbamidomethylation:1000.00
Sample 2	3	8	SPARC OS=Gallus gallus GN=SPARC PE=4 SV=1	tr|F1P291|F1P291_CHICK	K.LHLDY(+15.99)IGPC(+57.02)K.F	Y	47.95	1230.61	10	1	616.311	2	19.51		F24:212	1	136	145	Oxidation or Hydroxylation; Carbamidomethylation	Y5:Oxidation or Hydroxylation:30.46;C9:Carbamidomethylation:1000.00
Sample 2	3	9	SPARC OS=Gallus gallus GN=SPARC PE=2 SV=1	P36377|SPRC_CHICK	K.LHLDY(+15.99)IGPC(+57.02)K.F	Y	47.95	1230.61	10	1	616.311	2	19.51		F24:212	1	136	145	Oxidation or Hydroxylation; Carbamidomethylation	Y5:Oxidation or Hydroxylation:30.46;C9:Carbamidomethylation:1000.00
Sample 2	6	7	Uncharacterized protein OS=Gallus gallus GN=AHSG PE=4 SV=1	tr|E1BZE1|E1BZE1_CHICK	A.Q(-17.03)HDKVPHPVGFVPPPPLC(+57.02)PGK.I	Y	27.82	2285.18	21	1.3	762.734	3	20.97		F24:236	2	318	338	Pyro-glu from Q; Carbamidomethylation	Q1:Pyro-glu from Q:1000.00;C18:Carbamidomethylation:1000.00
Sample 2	2	2	Serum albumin OS=Gallus gallus GN=ALB PE=4 SV=2	tr|F2Z4L6|F2Z4L6_CHICK	M.EAEFDEKPADLPSLVEK.Y	Y	25.55	1915.94	17	0.6	958.979	2	23.13		F24:263	1	270	286
Sample 2	2	3	Serum albumin OS=Gallus gallus GN=ALB PE=1 SV=2	P19121|ALBU_CHICK	M.EAEFDEKPADLPSLVEK.Y	Y	25.55	1915.94	17	0.6	958.979	2	23.13		F24:263	1	320	336
Sample 2	7	36	Uncharacterized protein OS=Gallus gallus GN=OMD PE=4 SV=1	tr|R4GF52|R4GF52_CHICK	A.E(+57.02)(+14.02)VPHFPFPVEC(+57.02)AR.E	Y	18.22	1654.79	13	0.4	552.605	3	25.74		F24:300	1	51	63	Carbamidomethylation (DHKE X@N-term); Methyl ester; Carbamidomethylation	E1:Carbamidomethylation (DHKE X@N-term):38.16;E1:Methyl ester:61.14;C11:Carbamidomethylation:1000.00
Sample 2	7	36	Uncharacterized protein OS=Gallus gallus GN=OMD PE=4 SV=1	tr|R4GF52|R4GF52_CHICK	Y.AFFC(+57.02)FPHIR.T	Y	46.2	1193.58	9	0.8	597.798	2	26.74		F24:311	2	350	358	Carbamidomethylation	C4:Carbamidomethylation:1000.00
Sample 2	2	2	Serum albumin OS=Gallus gallus GN=ALB PE=4 SV=2	tr|F2Z4L6|F2Z4L6_CHICK	R.RHPFLYAPAIL.S	Y	29.91	1296.73	11	0.7	649.375	2	27.25		F24:317	1	123	133
Sample 2	2	3	Serum albumin OS=Gallus gallus GN=ALB PE=1 SV=2	P19121|ALBU_CHICK	R.RHPFLYAPAIL.S	Y	29.91	1296.73	11	0.7	649.375	2	27.25		F24:317	1	173	183
Sample 2	12	8242	Transmembrane channel-like protein OS=Gallus gallus GN=TMC1 PE=3 SV=1	tr|R4GKQ5|R4GKQ5_CHICK	R.AVFVR.F	Y	26.27	590.354	5	-3.2	591.359	1	45.94		F24:490	1	653	657
Sample 2	12	8244	Transmembrane channel-like protein OS=Gallus gallus GN=Tmc1 PE=2 SV=1	tr|Q5YCC9|Q5YCC9_CHICK	R.AVFVR.F	Y	26.27	590.354	5	-3.2	591.359	1	45.94		F24:490	1	650	654
Sample 2	12	8245	Transmembrane channel-like protein OS=Gallus gallus GN=TMC1 PE=3 SV=2	tr|F1NJC8|F1NJC8_CHICK	R.AVFVR.F	Y	26.27	590.354	5	-3.2	591.359	1	45.94		F24:490	1	650	654
