# Supplementary material for: Bone protein “extractomics”: comparing the efficiency of bone protein extractions of Gallus gallus in tandem mass spectrometry, with an eye towards paleoproteomics
Source: PeerJ. 2016 Oct 27;4:e2603. doi: 10.7717/peerj.2603 (PMC5088622; doi:10.7717/peerj.2603)
Supplement: Table S12 [file peerj-04-2603-s016.xlsx]

## Sheet: ZED1_protein-peptides.csv
Table S12. Peptides identified in samples from Method 7, dialyzed EDTA 1 (20 mL/g), post-NaOH (First incubation) (20-N/EDTA1-D) @ 1% FDR
Sample #	Protein Group	Protein ID	Protein Description	Protein Accession	Peptide	Unique	-10lgP	Mass	Length	ppm	m/z	z	RT	Area	Scan	#Spec	Start	End	PTM	AScore
Sample 1	4	7	Uncharacterized protein OS=Gallus gallus GN=AHSG PE=4 SV=1	tr|E1BZE1|E1BZE1_CHICK	R.TFAEHAVEGDC(+57.02)DVK.L	Y	55.55	1576.68	14	1	789.349	2	14.39		F35:107	2	101	114	Carbamidomethylation	C11:Carbamidomethylation:1000.00
Sample 1	1	6	Apolipoprotein A-I OS=Gallus gallus GN=APOA1 PE=1 SV=2	P08250|APOA1_CHICK	K.LREDM(+15.99)APYYKEVR.E	Y	48.22	1684.82	13	0.7	562.616	3	14.51		F35:110	1	83	95	Oxidation (M)	M5:Oxidation (M):1000.00
Sample 1	4	7	Uncharacterized protein OS=Gallus gallus GN=AHSG PE=4 SV=1	tr|E1BZE1|E1BZE1_CHICK	R.TF(+15.99)AEHAVEGDC(+57.02)DVK.L	Y	18.36	1592.68	14	0.6	797.347	2	14.7		F35:113	1	101	114	Oxidation or Hydroxylation; Carbamidomethylation	F2:Oxidation or Hydroxylation:43.76;C11:Carbamidomethylation:1000.00
Sample 1	3	3	Serum albumin OS=Gallus gallus GN=ALB PE=1 SV=2	P19121|ALBU_CHICK	K.LC(+57.02)SAPAEEREVGQMK.L	Y	37.79	1703.8	15	1.1	852.907	2	15.01		F35:118	3	541	555	Carbamidomethylation	C2:Carbamidomethylation:1000.00
Sample 1	8	19	Uncharacterized protein OS=Gallus gallus GN=SERPINF1 PE=3 SV=1	tr|E1C7H6|E1C7H6_CHICK	L.SLGAGERTEDVISR.A	Y	34.89	1488.75	14	0.7	497.259	3	15.05		F35:119	2	91	104
Sample 1	8	19	Uncharacterized protein OS=Gallus gallus GN=SERPINF1 PE=3 SV=1	tr|E1C7H6|E1C7H6_CHICK	G.A(+57.02)GERTEDVISR.A	Y	20.44	1288.64	11	0.5	645.326	2	15.08		F35:120	1	94	104	Carbamidomethylation (DHKE X@N-term)	A1:Carbamidomethylation (DHKE X@N-term):0.00
Sample 1	6	618	Uncharacterized protein OS=Gallus gallus GN=COL11A1 PE=4 SV=2	tr|F1P4K9|F1P4K9_CHICK	E.EYITGEDYDKKTEETEYGSR.G	Y	27.62	2412.06	20	1.3	805.029	3	15.45		F35:129	1	345	364
Sample 1	1	6	Apolipoprotein A-I OS=Gallus gallus GN=APOA1 PE=1 SV=2	P08250|APOA1_CHICK	K.LREDMAPY(+15.99)YK.E	Y	33.84	1300.61	10	1.1	651.314	2	16.49		F35:154	2	83	92	Oxidation or Hydroxylation	Y8:Oxidation or Hydroxylation:40.00
Sample 1	1	6	Apolipoprotein A-I OS=Gallus gallus GN=APOA1 PE=1 SV=2	P08250|APOA1_CHICK	K.LREDM(+15.99)APY(+15.99)YK.E	Y	19.14	1316.61	10	0.4	659.311	2	16.54		F35:156	1	83	92	Oxidation (M); Oxidation or Hydroxylation	M5:Oxidation (M):1000.00;Y8:Oxidation or Hydroxylation:0.00
Sample 1	21	19874	Uncharacterized protein OS=Gallus gallus GN=CYTL1 PE=4 SV=2	tr|F1NSV3|F1NSV3_CHICK	R.VLEVSELKEK.A	Y	45.53	1172.67	10	0.4	587.34	2	16.57		F35:157	2	81	90
Sample 1	1	6	Apolipoprotein A-I OS=Gallus gallus GN=APOA1 PE=1 SV=2	P08250|APOA1_CHICK	K.VMEQLSNLREK.M	Y	28.38	1345.7	11	0.8	673.859	2	16.7		F35:161	3	219	229
Sample 1	6	618	Uncharacterized protein OS=Gallus gallus GN=COL11A1 PE=4 SV=2	tr|F1P4K9|F1P4K9_CHICK	K.SITMIVDC(+57.02)NKK.T	Y	37.34	1307.66	11	0.6	654.837	2	16.73		F35:162	1	178	188	Carbamidomethylation	C8:Carbamidomethylation:1000.00
Sample 1	1	6	Apolipoprotein A-I OS=Gallus gallus GN=APOA1 PE=1 SV=2	P08250|APOA1_CHICK	K.LREDMAPYYK.E	Y	49.27	1284.62	10	1	643.317	2	16.76		F35:163	5	83	92
Sample 1	1	6	Apolipoprotein A-I OS=Gallus gallus GN=APOA1 PE=1 SV=2	P08250|APOA1_CHICK	R.LTPVAQELK.E	Y	38.25	997.581	9	0.8	499.798	2	17.04		F35:172	3	142	150
Sample 1	1	6	Apolipoprotein A-I OS=Gallus gallus GN=APOA1 PE=1 SV=2	P08250|APOA1_CHICK	R.LTPYAENLK.N	Y	41.48	1047.56	9	0.4	524.788	2	17.26		F35:179	1	241	249
Sample 1	2	8	SPARC OS=Gallus gallus GN=SPARC PE=4 SV=1	tr|F1P291|F1P291_CHICK	C.QDPSSC(+57.02)PATSGV(sub I)FEK.V	Y	46.41	1608.71	15	0.7	805.362	2	17.51		F35:188	4	91	105	Carbamidomethylation; Mutation	C6:Carbamidomethylation:1000.00
Sample 1	2	8	SPARC OS=Gallus gallus GN=SPARC PE=4 SV=1	tr|F1P291|F1P291_CHICK	R.APLIPMEHC(+57.02)TTR.F	Y	30.05	1424.69	12	0.5	475.904	3	17.68		F35:194	2	252	263	Carbamidomethylation	C9:Carbamidomethylation:1000.00
Sample 1	7	20	Vitronectin OS=Gallus gallus PE=2 SV=1	tr|O12945|O12945_CHICK	R.GVPNQLDAA.M	Y	22.3	883.44	9	-3.3	884.444	1	17.72		F35:195	1	338	346
Sample 1	7	21	Uncharacterized protein OS=Gallus gallus GN=VTN PE=4 SV=2	tr|E1C7A7|E1C7A7_CHICK	R.GVPNQLDAA.M	Y	22.3	883.44	9	-3.3	884.444	1	17.72		F35:195	1	338	346
Sample 1	9	10	Decorin OS=Gallus gallus GN=DCN PE=1 SV=1	P28675|PGS2_CHICK	R.VVQC(+57.02)SDLGLER.V	Y	55.2	1274.63	11	0.4	638.322	2	17.8		F35:197	1	62	72	Carbamidomethylation	C4:Carbamidomethylation:1000.00
Sample 1	9	11	Decorin OS=Gallus gallus GN=DCN PE=4 SV=2	tr|E1BRE9|E1BRE9_CHICK	R.VVQC(+57.02)SDLGLER.V	Y	55.2	1274.63	11	0.4	638.322	2	17.8		F35:197	1	62	72	Carbamidomethylation	C4:Carbamidomethylation:1000.00
Sample 1	2	8	SPARC OS=Gallus gallus GN=SPARC PE=4 SV=1	tr|F1P291|F1P291_CHICK	K.TYDSSC(+57.02)HFFATK.C	Y	54.6	1462.62	12	1	732.317	2	17.86		F35:199	1	113	124	Carbamidomethylation	C6:Carbamidomethylation:1000.00
Sample 1	1	6	Apolipoprotein A-I OS=Gallus gallus GN=APOA1 PE=1 SV=2	P08250|APOA1_CHICK	K.WTEELEQYRQR.L	Y	45.22	1536.73	11	0.3	769.374	2	18.17		F35:210	3	131	141
Sample 1	4	7	Uncharacterized protein OS=Gallus gallus GN=AHSG PE=4 SV=1	tr|E1BZE1|E1BZE1_CHICK	K.QYHPVQ(sub R)MV.S	Y	26.06	1000.48	8	1	501.248	2	18.43		F35:219	3	188	195	Mutation
Sample 1	6	618	Uncharacterized protein OS=Gallus gallus GN=COL11A1 PE=4 SV=2	tr|F1P4K9|F1P4K9_CHICK	Y.NEQGIQQVGVEVGR.S	Y	42.36	1511.77	14	0.8	756.893	2	18.46		F35:220	1	123	136
Sample 1	2	8	SPARC OS=Gallus gallus GN=SPARC PE=4 SV=1	tr|F1P291|F1P291_CHICK	F.GQLDQHPIDGY.L	Y	20.61	1241.57	11	1.1	621.792	2	18.6		F35:224	2	231	241
Sample 1	11	26	Secreted phosphoprotein 24 OS=Gallus gallus GN=SPP2 PE=4 SV=1	tr|F1P4U3|F1P4U3_CHICK	K.ASGRDPFTC(+57.02)GFK.V	Y	47.14	1341.61	12	0.9	671.815	2	18.75		F35:229	2	95	106	Carbamidomethylation	C9:Carbamidomethylation:1000.00
Sample 1	11	27	Secreted phosphoprotein 24 OS=Gallus gallus GN=SPP2 PE=2 SV=1	Q710A0|SPP24_CHICK	K.ASGRDPFTC(+57.02)GFK.V	Y	47.14	1341.61	12	0.9	671.815	2	18.75		F35:229	2	95	106	Carbamidomethylation	C9:Carbamidomethylation:1000.00
Sample 1	18	69	Bone sialoprotein 2 OS=Gallus gallus GN=IBSP PE=1 SV=1	P79780|SIAL_CHICK	Q.AAGEGLTLGDVGPGGDAASAHQDC(+57.02)K.G	Y	45.82	2353.06	25	0.9	785.361	3	18.88		F35:233	2	85	109	Carbamidomethylation	C24:Carbamidomethylation:1000.00
Sample 1	18	70	Bone sialoprotein 2 OS=Gallus gallus GN=IBSP PE=4 SV=1	tr|F6TAB6|F6TAB6_CHICK	Q.AAGEGLTLGDVGPGGDAASAHQDC(+57.02)K.G	Y	45.82	2353.06	25	0.9	785.361	3	18.88		F35:233	2	85	109	Carbamidomethylation	C24:Carbamidomethylation:1000.00
Sample 1	5	4	Collagen alpha-1(I) chain OS=Gallus gallus GN=COL1A1 PE=1 SV=3	P02457|CO1A1_CHICK	R.GEQGPAGAPGFQ(+37.03).G	Y	17.21	1151.54	12	9.2	576.78	2	19.51		F35:252	1	621	632	Propargylamine	Q12:Propargylamine:71.03
Sample 1	2	8	SPARC OS=Gallus gallus GN=SPARC PE=4 SV=1	tr|F1P291|F1P291_CHICK	K.LHLDY(+31.99)IGPC(+57.02)K.F	Y	31.47	1246.6	10	0.8	624.308	2	19.54		F35:253	1	136	145	Dihydroxy; Carbamidomethylation	Y5:Dihydroxy:29.32;C9:Carbamidomethylation:1000.00
Sample 1	2	8	SPARC OS=Gallus gallus GN=SPARC PE=4 SV=1	tr|F1P291|F1P291_CHICK	K.LHLDY(+15.99)IGPC(+57.02)K.F	Y	40.65	1230.61	10	1.6	616.312	2	19.56		F35:254	1	136	145	Oxidation or Hydroxylation; Carbamidomethylation	Y5:Oxidation or Hydroxylation:26.02;C9:Carbamidomethylation:1000.00
Sample 1	2	8	SPARC OS=Gallus gallus GN=SPARC PE=4 SV=1	tr|F1P291|F1P291_CHICK	K.LHLDYIGPCK(+57.02).F	Y	21.47	1214.61	10	0.6	608.313	2	19.79		F35:262	1	136	145	Carbamidomethylation (DHKE X@N-term)	K10:Carbamidomethylation (DHKE X@N-term):16.36
Sample 1	1	6	Apolipoprotein A-I OS=Gallus gallus GN=APOA1 PE=1 SV=2	P08250|APOA1_CHICK	K.NLAPYSDELR.Q	Y	33.83	1176.58	10	0.6	589.296	2	19.82		F35:263	1	185	194
Sample 1	1	6	Apolipoprotein A-I OS=Gallus gallus GN=APOA1 PE=1 SV=2	P08250|APOA1_CHICK	K.ASGKDAIAQFESS.A	Y	52.63	1309.62	13	0.5	655.815	2	19.88		F35:265	3	47	59
Sample 1	1	6	Apolipoprotein A-I OS=Gallus gallus GN=APOA1 PE=1 SV=2	P08250|APOA1_CHICK	K.W(+15.99)TEELEQYR.Q	Y	43.36	1268.57	9	1.4	635.292	2	20.69		F35:290	2	131	139	Oxidation (HW)	W1:Oxidation (HW):1000.00
Sample 1	1	6	Apolipoprotein A-I OS=Gallus gallus GN=APOA1 PE=1 SV=2	P08250|APOA1_CHICK	K.W(+31.99)TEELEQYR.Q	Y	38.48	1284.56	9	0.9	643.289	2	20.72		F35:291	1	131	139	Dihydroxy	W1:Dihydroxy:79.54
Sample 1	11	26	Secreted phosphoprotein 24 OS=Gallus gallus GN=SPP2 PE=4 SV=1	tr|F1P4U3|F1P4U3_CHICK	K.VGPFVPTAVC(+57.02)K.S	Y	49.66	1173.62	11	0.8	587.818	2	20.91		F35:297	2	107	117	Carbamidomethylation	C10:Carbamidomethylation:1000.00
Sample 1	11	27	Secreted phosphoprotein 24 OS=Gallus gallus GN=SPP2 PE=2 SV=1	Q710A0|SPP24_CHICK	K.VGPFVPTAVC(+57.02)K.S	Y	49.66	1173.62	11	0.8	587.818	2	20.91		F35:297	2	107	117	Carbamidomethylation	C10:Carbamidomethylation:1000.00
Sample 1	1	6	Apolipoprotein A-I OS=Gallus gallus GN=APOA1 PE=1 SV=2	P08250|APOA1_CHICK	R.IRDMVDVY.L	Y	20.16	1009.49	8	0.5	505.753	2	21.56		F35:319	3	34	41
Sample 1	18	69	Bone sialoprotein 2 OS=Gallus gallus GN=IBSP PE=1 SV=1	P79780|SIAL_CHICK	Q.AAGEGLTLGDVGPGGDAASAH.Q	Y	25.88	1821.85	21	1.7	911.933	2	21.62		F35:321	1	85	105
Sample 1	18	70	Bone sialoprotein 2 OS=Gallus gallus GN=IBSP PE=4 SV=1	tr|F6TAB6|F6TAB6_CHICK	Q.AAGEGLTLGDVGPGGDAASAH.Q	Y	25.88	1821.85	21	1.7	911.933	2	21.62		F35:321	1	85	105
Sample 1	12	1	Collagen alpha-2(I) chain OS=Gallus gallus GN=COL1A2 PE=4 SV=1	tr|F1P0H9|F1P0H9_CHICK	R.TGEQGI(+28.03).A	Y	22.46	631.318	6	0.9	632.326	1	22.01		F35:330	1	830	835	Ethylation	I6:Ethylation:5.08
Sample 1	12	5	Collagen alpha-2(I) chain (Fragments) OS=Gallus gallus GN=COL1A2 PE=1 SV=2	P02467|CO1A2_CHICK	R.TGEQGI(+28.03).A	Y	22.46	631.318	6	0.9	632.326	1	22.01		F35:330	1	829	834	Ethylation	I6:Ethylation:5.08
Sample 1	1	6	Apolipoprotein A-I OS=Gallus gallus GN=APOA1 PE=1 SV=2	P08250|APOA1_CHICK	R.EMWLKDTEALR.A	Y	48.53	1390.69	11	0.5	696.353	2	22.38		F35:342	2	96	106
Sample 1	8	19	Uncharacterized protein OS=Gallus gallus GN=SERPINF1 PE=3 SV=1	tr|E1C7H6|E1C7H6_CHICK	K.LNYEEALGNTVK.E	Y	50.04	1349.68	12	1.1	675.849	2	22.41		F35:343	1	322	333
Sample 1	17	15	Cystatin OS=Gallus gallus PE=1 SV=2	P01038|CYT_CHICK	R.LLGAPVPVDENDEGLQR.A	Y	53.48	1820.93	17	0.8	911.471	2	22.71		F35:352	2	30	46
Sample 1	17	16	Uncharacterized protein OS=Gallus gallus GN=CST3 PE=4 SV=1	tr|R4GLT1|R4GLT1_CHICK	R.LLGAPVPVDENDEGLQR.A	Y	53.48	1820.93	17	0.8	911.471	2	22.71		F35:352	2	42	58
Sample 1	2	8	SPARC OS=Gallus gallus GN=SPARC PE=4 SV=1	tr|F1P291|F1P291_CHICK	G.I(+57.02)KEQDIDKDLVI	Y	19.35	1484.81	12	0.1	495.943	3	23		F35:362	2	287	298	Carbamidomethylation (DHKE X@N-term)	I1:Carbamidomethylation (DHKE X@N-term):9.40
Sample 1	1	6	Apolipoprotein A-I OS=Gallus gallus GN=APOA1 PE=1 SV=2	P08250|APOA1_CHICK	K.M(+15.99)TPLVQEFR.E	Y	45.89	1135.57	9	0.6	568.792	2	23.55		F35:381	1	230	238	Oxidation (M)	M1:Oxidation (M):1000.00
Sample 1	1	6	Apolipoprotein A-I OS=Gallus gallus GN=APOA1 PE=1 SV=2	P08250|APOA1_CHICK	K.LADNLDTLSAA.A	Y	33.73	1102.55	11	1.4	552.283	2	23.84		F35:389	2	69	79
Sample 1	6	618	Uncharacterized protein OS=Gallus gallus GN=COL11A1 PE=4 SV=2	tr|F1P4K9|F1P4K9_CHICK	Q.QLLIIADPR.A	Y	20.8	1037.62	9	0.4	519.819	2	24.21		F35:401	1	225	233
Sample 1	2	8	SPARC OS=Gallus gallus GN=SPARC PE=4 SV=1	tr|F1P291|F1P291_CHICK	R.LEAGDHTVELL.A	Y	38.53	1195.61	11	1	598.812	2	24.25		F35:402	4	201	211
Sample 1	2	8	SPARC OS=Gallus gallus GN=SPARC PE=4 SV=1	tr|F1P291|F1P291_CHICK	K.EQDIDKDLVI	Y	34.61	1186.61	10	0.6	594.312	2	24.64		F35:413	3	289	298
Sample 1	4	7	Uncharacterized protein OS=Gallus gallus GN=AHSG PE=4 SV=1	tr|E1BZE1|E1BZE1_CHICK	C.QLLPEDQSNFGFC(+57.02)TAK.M	Y	39.99	1853.86	16	0.6	927.939	2	25.04		F35:423	2	219	234	Carbamidomethylation	C13:Carbamidomethylation:1000.00
Sample 1	6	618	Uncharacterized protein OS=Gallus gallus GN=COL11A1 PE=4 SV=2	tr|F1P4K9|F1P4K9_CHICK	R.SGKPVVDTNGITVF.G	Y	26.41	1432.76	14	0.2	717.385	2	25.19		F35:428	1	196	209
Sample 1	19	36	Uncharacterized protein OS=Gallus gallus GN=OMD PE=4 SV=1	tr|R4GF52|R4GF52_CHICK	Q.AEVPHFPFPVEC(+57.02)AR.E	Y	23.8	1654.79	14	1.2	552.605	3	25.77		F35:447	1	50	63	Carbamidomethylation	C12:Carbamidomethylation:1000.00
Sample 1	3	3	Serum albumin OS=Gallus gallus GN=ALB PE=1 SV=2	P19121|ALBU_CHICK	K.QSDINTC(+57.02)FGEEGANLIVQSR.A	Y	47.71	2237.04	20	0.6	1119.53	2	25.96		F35:453	2	589	608	Carbamidomethylation	C7:Carbamidomethylation:1000.00
Sample 1	10	25	Matrix Gla protein OS=Gallus gallus GN=MGP PE=2 SV=1	O42413|MGP_CHICK	H.EYLNPFLNR.Q	Y	43.61	1164.59	9	0.4	583.304	2	26.55		F35:471	2	30	38
Sample 1	4	7	Uncharacterized protein OS=Gallus gallus GN=AHSG PE=4 SV=1	tr|E1BZE1|E1BZE1_CHICK	K.QYHPVQ(sub R)MVSVEFA.V	Y	22.99	1533.73	13	0.9	767.872	2	26.58		F35:472	1	188	200	Mutation
Sample 1	1	6	Apolipoprotein A-I OS=Gallus gallus GN=APOA1 PE=1 SV=2	P08250|APOA1_CHICK	R.LTPVAQELKEL.T	Y	43.84	1239.71	11	0.5	620.861	2	26.8		F35:479	2	142	152
Sample 1	2	8	SPARC OS=Gallus gallus GN=SPARC PE=4 SV=1	tr|F1P291|F1P291_CHICK	K.NVLITLYERDEDNNLLTEKQ.K	Y	39.13	2419.22	20	0.7	807.415	3	27.04		F35:487	2	168	187
Sample 1	2	8	SPARC OS=Gallus gallus GN=SPARC PE=4 SV=1	tr|F1P291|F1P291_CHICK	K.NVLITLYERDED(+15.99)NNLLTEK.Q	Y	32.12	2307.16	19	0.1	770.061	3	27.35		F35:497	1	168	186	Oxidation or Hydroxylation	D12:Oxidation or Hydroxylation:0.00
Sample 1	3	3	Serum albumin OS=Gallus gallus GN=ALB PE=1 SV=2	P19121|ALBU_CHICK	K.ADPERNEC(+57.02)FLSF.K	Y	33.25	1483.64	12	0.7	742.828	2	27.64		F35:506	2	121	132	Carbamidomethylation	C8:Carbamidomethylation:1000.00
Sample 1	1	6	Apolipoprotein A-I OS=Gallus gallus GN=APOA1 PE=1 SV=2	P08250|APOA1_CHICK	K.QLDLKLADNLDTLSAAAAK.L	Y	40.37	1970.07	19	0.7	657.697	3	27.67		F35:507	2	64	82
Sample 1	4	7	Uncharacterized protein OS=Gallus gallus GN=AHSG PE=4 SV=1	tr|E1BZE1|E1BZE1_CHICK	K.ISHNNPVASESSSSEFPSLL.S	Y	27.97	2101	20	0.7	1051.51	2	27.78		F35:510	1	284	303
Sample 1	4	7	Uncharacterized protein OS=Gallus gallus GN=AHSG PE=4 SV=1	tr|E1BZE1|E1BZE1_CHICK	K.DNLAAC(+57.02)QLLPEDQSNFGFC(+57.02)TAK.M	Y	39.37	2498.12	22	1.2	833.715	3	27.9		F35:512	3	213	234	Carbamidomethylation	C6:Carbamidomethylation:1000.00;C19:Carbamidomethylation:1000.00
Sample 1	3	3	Serum albumin OS=Gallus gallus GN=ALB PE=1 SV=2	P19121|ALBU_CHICK	K.LLINLIK.R	Y	26.65	825.569	7	0.9	826.577	1	27.95		F35:514	4	556	562
Sample 1	4	7	Uncharacterized protein OS=Gallus gallus GN=AHSG PE=4 SV=1	tr|E1BZE1|E1BZE1_CHICK	K.QYHPVQ(sub R)MVSVEFAVA.A	Y	19.55	1703.83	15	0.7	852.925	2	28.26		F35:521	3	188	202	Mutation
Sample 1	1	6	Apolipoprotein A-I OS=Gallus gallus GN=APOA1 PE=1 SV=2	P08250|APOA1_CHICK	K.IRPFLDQF.S	Y	31	1034.55	8	0.7	518.285	2	28.97		F35:541	3	120	127
Sample 1	2	8	SPARC OS=Gallus gallus GN=SPARC PE=4 SV=1	tr|F1P291|F1P291_CHICK	L.TTEGPVGANPVQVEVGEFEEPTEDVEEIVAENPC(+57.02)QNHHC(+57.02)K.H	Y	35.38	4474	40	4.5	1119.51	4	29.37		F35:552	1	34	73	Carbamidomethylation	C34:Carbamidomethylation:1000.00;C39:Carbamidomethylation:1000.00
Sample 1	1	6	Apolipoprotein A-I OS=Gallus gallus GN=APOA1 PE=1 SV=2	P08250|APOA1_CHICK	R.LISF(+31.99)LDELQK.S	Y	22.26	1236.66	10	0.4	619.338	2	30.16		F35:571	1	252	261	Dihydroxy	F4:Dihydroxy:36.87
Sample 1	1	6	Apolipoprotein A-I OS=Gallus gallus GN=APOA1 PE=1 SV=2	P08250|APOA1_CHICK	R.LISF(+15.99)LDELQK.S	Y	36.59	1220.67	10	1.6	611.341	2	30.2		F35:572	1	252	261	Oxidation or Hydroxylation	F4:Oxidation or Hydroxylation:80.00
Sample 1	8	19	Uncharacterized protein OS=Gallus gallus GN=SERPINF1 PE=3 SV=1	tr|E1C7H6|E1C7H6_CHICK	K.IAQLPLTEGVSAM.F	Y	44.41	1328.7	13	1	665.358	2	30.23		F35:573	2	266	278
Sample 1	1	6	Apolipoprotein A-I OS=Gallus gallus GN=APOA1 PE=1 SV=2	P08250|APOA1_CHICK	R.LISFLDELQKS.V	Y	44.33	1291.7	11	0.5	646.859	2	30.4		F35:578	2	252	262
Sample 1	23	1202	Thrombospondin-2 OS=Gallus gallus GN=THBS2 PE=2 SV=1	P35440|TSP2_CHICK	R.KTIGAK(+31.99).L	Y	15.62	648.381	6	6.6	649.392	1	30.59		F35:581	1	44	49	Dihydroxy	K6:Dihydroxy:11.54
Sample 1	23	1203	Thrombospondin-2 OS=Gallus gallus GN=THBS2 PE=4 SV=2	tr|E1C3P2|E1C3P2_CHICK	R.KTIGAK(+31.99).L	Y	15.62	648.381	6	6.6	649.392	1	30.59		F35:581	1	79	84	Dihydroxy	K6:Dihydroxy:11.54
Sample 1	3	3	Serum albumin OS=Gallus gallus GN=ALB PE=1 SV=2	P19121|ALBU_CHICK	K.AVAMITF.A	Y	23.84	751.394	7	0.3	752.401	1	30.87		F35:588	1	48	54
Sample 1	7	20	Vitronectin OS=Gallus gallus PE=2 SV=1	tr|O12945|O12945_CHICK	R.DISEGFEGIPNDIDAAFALPAHSYHGNER.V	Y	52.7	3141.44	29	1.5	786.369	4	31.15		F35:593	2	240	268
Sample 1	7	21	Uncharacterized protein OS=Gallus gallus GN=VTN PE=4 SV=2	tr|E1C7A7|E1C7A7_CHICK	R.DISEGFEGIPNDIDAAFALPAHSYHGNER.V	Y	52.7	3141.44	29	1.5	786.369	4	31.15		F35:593	2	240	268
Sample 1	3	3	Serum albumin OS=Gallus gallus GN=ALB PE=1 SV=2	P19121|ALBU_CHICK	K.YVPPPFNPDMFSFDEK.L	Y	47.33	1928.87	16	1.2	643.963	3	32.04		F35:614	6	525	540
Sample 1	7	20	Vitronectin OS=Gallus gallus PE=2 SV=1	tr|O12945|O12945_CHICK	R.FDDGALDPGYPRDISEGFEGIPNDIDAAFALPAHSYHGNER.V	Y	52.51	4445.03	41	-0.7	890.012	5	32.07		F35:615	1	228	268
Sample 1	7	21	Uncharacterized protein OS=Gallus gallus GN=VTN PE=4 SV=2	tr|E1C7A7|E1C7A7_CHICK	R.FDDGALDPGYPRDISEGFEGIPNDIDAAFALPAHSYHGNER.V	Y	52.51	4445.03	41	-0.7	890.012	5	32.07		F35:615	1	228	268
Sample 1	3	3	Serum albumin OS=Gallus gallus GN=ALB PE=1 SV=2	P19121|ALBU_CHICK	R.RHPFLYAPAILSF.A	Y	24.52	1530.83	13	0.5	511.286	3	32.26		F35:618	1	173	185
Sample 1	2	8	SPARC OS=Gallus gallus GN=SPARC PE=4 SV=1	tr|F1P291|F1P291_CHICK	Y.IFPVHWQFGQL.D	Y	15.28	1370.71	11	1	686.365	2	32.82		F35:631	1	223	233
Sample 1	2	8	SPARC OS=Gallus gallus GN=SPARC PE=4 SV=1	tr|F1P291|F1P291_CHICK	K.FIP(+15.99)AC(+57.02)LDTELTEFPLR.M	Y	26.52	1936.96	16	0.3	969.488	2	32.99		F35:636	1	146	161	Oxidation or Hydroxylation; Carbamidomethylation	P3:Oxidation or Hydroxylation:18.23;C5:Carbamidomethylation:1000.00
Sample 1	9	10	Decorin OS=Gallus gallus GN=DCN PE=1 SV=1	P28675|PGS2_CHICK	K.IASIGINDFC(+57.02)PL.G	Y	21.51	1318.66	12	1.2	660.338	2	33.1		F35:639	1	302	313	Carbamidomethylation	C10:Carbamidomethylation:1000.00
Sample 1	9	11	Decorin OS=Gallus gallus GN=DCN PE=4 SV=2	tr|E1BRE9|E1BRE9_CHICK	K.IASIGINDFC(+57.02)PL.G	Y	21.51	1318.66	12	1.2	660.338	2	33.1		F35:639	1	302	313	Carbamidomethylation	C10:Carbamidomethylation:1000.00
Sample 1	13	617	Uncharacterized protein OS=Gallus gallus GN=KNG1 PE=4 SV=2	tr|E1BX43|E1BX43_CHICK	K.IVPVQPLIPFTQGIC(+57.02)LGC(+57.02)FHTISTDNSQVAEILKK.A	Y	45.08	3923.07	35	1.5	981.776	4	33.13		F35:640	2	128	162	Carbamidomethylation	C15:Carbamidomethylation:1000.00;C18:Carbamidomethylation:1000.00
Sample 1	3	3	Serum albumin OS=Gallus gallus GN=ALB PE=1 SV=2	P19121|ALBU_CHICK	K.C(+57.02)VANEDAPEC(+57.02)SKP(+15.99)LP(+15.99)SIILDEIC(+57.02)QVEK.L	Y	16.86	3145.46	27	0.6	1049.5	3	33.51		F35:648	1	80	106	Carbamidomethylation; Oxidation or Hydroxylation	C1:Carbamidomethylation:1000.00;C10:Carbamidomethylation:1000.00;P13:Oxidation or Hydroxylation:7.38;P15:Oxidation or Hydroxylation:6.08;C23:Carbamidomethylation:1000.00
Sample 1	3	3	Serum albumin OS=Gallus gallus GN=ALB PE=1 SV=2	P19121|ALBU_CHICK	K.C(+57.02)VANEDAT(sub P)EC(+57.02)SKPLPSIILDEIC(+57.02)QVEK.L	Y	22.77	3117.47	27	5.8	1040.17	3	33.76		F35:654	1	80	106	Carbamidomethylation; Mutation	C1:Carbamidomethylation:1000.00;C10:Carbamidomethylation:1000.00;C23:Carbamidomethylation:1000.00
Sample 1	7	20	Vitronectin OS=Gallus gallus PE=2 SV=1	tr|O12945|O12945_CHICK	K.LISDVWGIEGPIDAA.F	Y	19.11	1554.79	15	1.2	778.405	2	34.44		F35:668	1	193	207
Sample 1	7	21	Uncharacterized protein OS=Gallus gallus GN=VTN PE=4 SV=2	tr|E1C7A7|E1C7A7_CHICK	K.LISDVWGIEGPIDAA.F	Y	19.11	1554.79	15	1.2	778.405	2	34.44		F35:668	1	193	207
Sample 1	16	34	Tetranectin OS=Gallus gallus GN=CLEC3B PE=2 SV=1	tr|Q9DDD4|Q9DDD4_CHICK	K.SIGNEAEIWLGLNDMVAEGK.W	Y	45.28	2145.04	20	1	1073.53	2	34.6		F35:670	2	123	142
Sample 1	2	8	SPARC OS=Gallus gallus GN=SPARC PE=4 SV=1	tr|F1P291|F1P291_CHICK	C.DLDNDKYIALEEWASC(+57.02)FGIK.E	Y	36	2386.11	20	0.3	796.379	3	35.21		F35:680	1	269	288	Carbamidomethylation	C16:Carbamidomethylation:1000.00
Sample 1	3	3	Serum albumin OS=Gallus gallus GN=ALB PE=1 SV=2	P19121|ALBU_CHICK	K.C(+57.02)VANEDAPEC(+57.02)SKPLPSIILDEIC(+57.02)QVEKLR.D	Y	49.57	3382.66	29	1	846.672	4	35.47		F35:686	2	80	108	Carbamidomethylation	C1:Carbamidomethylation:1000.00;C10:Carbamidomethylation:1000.00;C23:Carbamidomethylation:1000.00
Sample 1	2	8	SPARC OS=Gallus gallus GN=SPARC PE=4 SV=1	tr|F1P291|F1P291_CHICK	R.DWLKNVLITLYERDEDNNLLTEK.Q	Y	26.15	2833.45	23	4	945.494	3	36.1		F35:699	1	164	186
Sample 1	15	259	Uncharacterized protein (Fragment) OS=Gallus gallus GN=COL5A1 PE=4 SV=2	tr|F1NI79|F1NI79_CHICK	K.TVLEINTPKVEQVPIVDIMFNDFGEASQK.F	Y	35.31	3260.66	29	0.8	1087.9	3	36.34		F35:704	1	1758	1786
Sample 1	15	260	Alpha 1 (V) collagen OS=Gallus gallus PE=2 SV=1	tr|Q9IAU4|Q9IAU4_CHICK	K.TVLEINTPKVEQVPIVDIMFNDFGEASQK.F	Y	35.31	3260.66	29	0.8	1087.9	3	36.34		F35:704	1	1795	1823
Sample 1	26	35	Lumican OS=Gallus gallus GN=LUM PE=1 SV=1	P51890|LUM_CHICK	K.GLNSLLYLDLSFNQLTK.L	Y	39.22	1938.05	17	1.4	970.032	2	37.19		F35:717	1	187	203
Sample 1	3	3	Serum albumin OS=Gallus gallus GN=ALB PE=1 SV=2	P19121|ALBU_CHICK	K.YVPPPFNPDMFSF.D	Y	37.65	1556.7	13	1.3	779.359	2	38.14		F35:729	3	525	537
Sample 1	4	7	Uncharacterized protein OS=Gallus gallus GN=AHSG PE=4 SV=1	tr|E1BZE1|E1BZE1_CHICK	R.VLFQGPNNEILFL.E	Y	22.38	1502.81	13	0.7	752.414	2	38.45		F35:737	4	65	77
Sample 1	15	259	Uncharacterized protein (Fragment) OS=Gallus gallus GN=COL5A1 PE=4 SV=2	tr|F1NI79|F1NI79_CHICK	K.QLYPASPFPEDFSIL.T	Y	14.5	1722.85	15	0.9	862.433	2	38.66		F35:743	1	54	68
Sample 1	15	260	Alpha 1 (V) collagen OS=Gallus gallus PE=2 SV=1	tr|Q9IAU4|Q9IAU4_CHICK	K.QLYPASPFPEDFSIL.T	Y	14.5	1722.85	15	0.9	862.433	2	38.66		F35:743	1	86	100
Sample 1	25	43	Alpha-1 type XI collagen (Fragment) OS=Gallus gallus PE=2 SV=1	tr|Q90796|Q90796_CHICK	K.FGFEVGPVC(+57.02)FLG	Y	48.04	1327.63	12	0.9	664.821	2	38.82		F35:746	1	877	888	Carbamidomethylation	C9:Carbamidomethylation:1000.00
Sample 1	2	8	SPARC OS=Gallus gallus GN=SPARC PE=4 SV=1	tr|F1P291|F1P291_CHICK	R.DWLKNVLITLY.E	Y	30.36	1376.77	11	0.8	689.393	2	38.92		F35:748	1	164	174
Sample 1	5	4	Collagen alpha-1(I) chain OS=Gallus gallus GN=COL1A1 PE=1 SV=3	P02457|CO1A1_CHICK	K.TSRLPIIDLAPMDVGAPDQEFGIDIGPVC(+57.02)FL	Y	22.65	3355.68	31	1.4	1119.57	3	40.6		F35:764	2	1423	1453	Carbamidomethylation	C29:Carbamidomethylation:1000.00
Sample 1	5	4	Collagen alpha-1(I) chain OS=Gallus gallus GN=COL1A1 PE=1 SV=3	P02457|CO1A1_CHICK	M.DVGAPDQEFGIDIGPVC(+57.02)FL	Y	17.66	2047.96	19	1.6	1024.99	2	40.73		F35:767	1	1435	1453	Carbamidomethylation	C17:Carbamidomethylation:1000.00
Sample 1	3	3	Serum albumin OS=Gallus gallus GN=ALB PE=1 SV=2	P19121|ALBU_CHICK	K.LC(+57.02)SAPAEEREVGQMK(+15.99).L	Y	26.21	1719.79	15	0.5	574.271	3	12.67		F35:89	1	541	555	Carbamidomethylation; Oxidation or Hydroxylation	C2:Carbamidomethylation:1000.00;K15:Oxidation or Hydroxylation:16.36
Sample 1	2	8	SPARC OS=Gallus gallus GN=SPARC PE=4 SV=1	tr|F1P291|F1P291_CHICK	L.RAPLIPM(+15.99)EHC(+57.02)TTR.F	Y	36.84	1596.79	13	0.4	533.27	3	12.93		F35:92	3	251	263	Oxidation (M); Carbamidomethylation	M7:Oxidation (M):1000.00;C10:Carbamidomethylation:1000.00
Sample 2	3	3	Serum albumin OS=Gallus gallus GN=ALB PE=1 SV=2	P19121|ALBU_CHICK	K.C(+57.02)C(+57.02)KTDNPAEC(+57.02)YANAQ.E	Y	38.57	1800.69	15	1.2	901.352	2	14.94		F36:115	1	388	402	Carbamidomethylation	C1:Carbamidomethylation:1000.00;C2:Carbamidomethylation:1000.00;C10:Carbamidomethylation:1000.00
Sample 2	2	8	SPARC OS=Gallus gallus GN=SPARC PE=4 SV=1	tr|F1P291|F1P291_CHICK	L.RAPLIPMEHC(+57.02)TTR.F	Y	43.63	1580.79	13	0.8	791.404	2	15.17		F36:120	2	251	263	Carbamidomethylation	C10:Carbamidomethylation:1000.00
Sample 2	2	8	SPARC OS=Gallus gallus GN=SPARC PE=4 SV=1	tr|F1P291|F1P291_CHICK	L.RAPLIP(+13.98)MEHC(+57.02)TTR.F	Y	21.87	1594.77	13	0.8	532.598	3	15.2		F36:121	1	251	263	Proline oxidation to pyroglutamic acid; Carbamidomethylation	P6:Proline oxidation to pyroglutamic acid:28.36;C10:Carbamidomethylation:1000.00
Sample 2	2	8	SPARC OS=Gallus gallus GN=SPARC PE=4 SV=1	tr|F1P291|F1P291_CHICK	I.PMEHC(+57.02)TTR.F	Y	36.57	1030.43	8	0.7	516.224	2	15.27		F36:123	1	256	263	Carbamidomethylation	C5:Carbamidomethylation:1000.00
Sample 2	3	3	Serum albumin OS=Gallus gallus GN=ALB PE=1 SV=2	P19121|ALBU_CHICK	R.YNDLKEETFK.A	Y	29.19	1285.62	10	0.6	643.817	2	15.3		F36:124	1	38	47
Sample 2	2	8	SPARC OS=Gallus gallus GN=SPARC PE=4 SV=1	tr|F1P291|F1P291_CHICK	L.YERDEDNNLLTEK.Q	Y	48.87	1637.75	13	1	819.885	2	15.44		F36:128	2	174	186
Sample 2	14	13	Uncharacterized protein OS=Gallus gallus GN=DMP1 PE=4 SV=2	tr|F1NUV7|F1NUV7_CHICK	R.KQAAELDDDDC(+57.02)QDGY	Y	56.46	1741.67	15	1.2	871.845	2	15.7		F36:136	2	415	429	Carbamidomethylation	C11:Carbamidomethylation:1000.00
Sample 2	14	24	Dentin matrix protein 1 OS=Gallus gallus GN=DMP1 PE=2 SV=1	tr|Q75P25|Q75P25_CHICK	R.KQAAELDDDDC(+57.02)QDGY	Y	56.46	1741.67	15	1.2	871.845	2	15.7		F36:136	2	415	429	Carbamidomethylation	C11:Carbamidomethylation:1000.00
Sample 2	4	7	Uncharacterized protein OS=Gallus gallus GN=AHSG PE=4 SV=1	tr|E1BZE1|E1BZE1_CHICK	R.TFAEHAVEGDC(+57.02)DVKLQK.V	Y	72.35	1945.92	17	0.4	649.648	3	15.81		F36:139	1	101	117	Carbamidomethylation	C11:Carbamidomethylation:1000.00
Sample 2	1	6	Apolipoprotein A-I OS=Gallus gallus GN=APOA1 PE=1 SV=2	P08250|APOA1_CHICK	R.AELTKDLEEVKEK.I	Y	52.56	1530.81	13	1.1	766.415	2	16.18		F36:146	3	107	119
Sample 2	1	6	Apolipoprotein A-I OS=Gallus gallus GN=APOA1 PE=1 SV=2	P08250|APOA1_CHICK	K.VM(+15.99)EQLSNLR.E	Y	41.17	1104.56	9	0.6	553.288	2	16.21		F36:147	2	219	227	Oxidation (M)	M2:Oxidation (M):1000.00
Sample 2	10	25	Matrix Gla protein OS=Gallus gallus GN=MGP PE=2 SV=1	O42413|MGP_CHICK	Q.RAN(+.98)GFIRDDTGLR.A	Y	41.04	1490.76	13	0.5	497.927	3	16.24		F36:148	3	40	52	Deamidation (NQ)	N3:Deamidation (NQ):1000.00
Sample 2	12	1	Collagen alpha-2(I) chain OS=Gallus gallus GN=COL1A2 PE=4 SV=1	tr|F1P0H9|F1P0H9_CHICK	R.GLP(+15.99)GAIGAP(+15.99)GPAGGAGDRGEGGPAGPAGPAGAR.G	Y	27.21	2724.33	33	1	909.119	3	16.65		F36:160	1	675	707	Oxidation or Hydroxylation	P3:Oxidation or Hydroxylation:99.62;P9:Oxidation or Hydroxylation:9.40
Sample 2	12	5	Collagen alpha-2(I) chain (Fragments) OS=Gallus gallus GN=COL1A2 PE=1 SV=2	P02467|CO1A2_CHICK	R.GLP(+15.99)GAIGAP(+15.99)GPAGGAGDRGEGGPAGPAGPAGAR.G	Y	27.21	2724.33	33	1	909.119	3	16.65		F36:160	1	674	706	Oxidation or Hydroxylation	P3:Oxidation or Hydroxylation:99.62;P9:Oxidation or Hydroxylation:9.40
Sample 2	5	4	Collagen alpha-1(I) chain OS=Gallus gallus GN=COL1A1 PE=1 SV=3	P02457|CO1A1_CHICK	R.DRDLEVDTTLK.S	Y	49.32	1303.66	11	1.1	652.839	2	16.79		F36:163	2	1215	1225
Sample 2	1	6	Apolipoprotein A-I OS=Gallus gallus GN=APOA1 PE=1 SV=2	P08250|APOA1_CHICK	K.NLAPYSDELRQK.L	Y	42.21	1432.73	12	0.7	717.373	2	16.85		F36:165	3	185	196
Sample 2	10	25	Matrix Gla protein OS=Gallus gallus GN=MGP PE=2 SV=1	O42413|MGP_CHICK	G.F(+57.02)IRDDTGLR.A	Y	30.52	1148.59	9	0.7	575.305	2	16.9		F36:167	1	44	52	Carbamidomethylation (DHKE X@N-term)	F1:Carbamidomethylation (DHKE X@N-term):22.45
Sample 2	17	15	Cystatin OS=Gallus gallus PE=1 SV=2	P01038|CYT_CHICK	L.GAPVPVDENDEGLQR.A	Y	42.1	1594.76	15	0.8	798.387	2	16.97		F36:169	1	32	46
Sample 2	17	16	Uncharacterized protein OS=Gallus gallus GN=CST3 PE=4 SV=1	tr|R4GLT1|R4GLT1_CHICK	L.GAPVPVDENDEGLQR.A	Y	42.1	1594.76	15	0.8	798.387	2	16.97		F36:169	1	44	58
Sample 2	1	6	Apolipoprotein A-I OS=Gallus gallus GN=APOA1 PE=1 SV=2	P08250|APOA1_CHICK	K.LREDMAPYYKEVR.E	Y	54.84	1668.83	13	0.9	557.284	3	17.12		F36:173	2	83	95
Sample 2	2	8	SPARC OS=Gallus gallus GN=SPARC PE=4 SV=1	tr|F1P291|F1P291_CHICK	T.LYERDEDNNLLTEKQ.K	Y	23.99	1878.9	15	0.3	627.306	3	17.2		F36:176	1	173	187
Sample 2	2	8	SPARC OS=Gallus gallus GN=SPARC PE=4 SV=1	tr|F1P291|F1P291_CHICK	T.LYERDEDNNLLTEK.Q	Y	50.02	1750.84	14	1	876.427	2	17.49		F36:183	6	173	186
Sample 2	1	6	Apolipoprotein A-I OS=Gallus gallus GN=APOA1 PE=1 SV=2	P08250|APOA1_CHICK	R.IRDM(+15.99)VDVY.L	Y	29.35	1025.49	8	0.5	513.75	2	17.61		F36:187	2	34	41	Oxidation (M)	M4:Oxidation (M):1000.00
Sample 2	3	3	Serum albumin OS=Gallus gallus GN=ALB PE=1 SV=2	P19121|ALBU_CHICK	K.QFGDRVFQAR.Q	Y	39.59	1222.62	10	0.8	612.318	2	17.71		F36:190	2	233	242
Sample 2	4	7	Uncharacterized protein OS=Gallus gallus GN=AHSG PE=4 SV=1	tr|E1BZE1|E1BZE1_CHICK	R.TFAEHAVEGDC(+57.02)DVKLQ.K	Y	59.35	1817.83	16	0.7	606.949	3	18		F36:200	8	101	116	Carbamidomethylation	C11:Carbamidomethylation:1000.00
Sample 2	3	3	Serum albumin OS=Gallus gallus GN=ALB PE=1 SV=2	P19121|ALBU_CHICK	K.LVKDVVDLAQK.C	Y	57.4	1226.72	11	0.7	614.369	2	18.29		F36:210	4	69	79
Sample 2	14	13	Uncharacterized protein OS=Gallus gallus GN=DMP1 PE=4 SV=2	tr|F1NUV7|F1NUV7_CHICK	K.QAAELDDDDC(+57.02)QDGY	Y	58.37	1613.58	14	0.4	807.797	2	18.37		F36:213	2	416	429	Carbamidomethylation	C10:Carbamidomethylation:1000.00
Sample 2	14	24	Dentin matrix protein 1 OS=Gallus gallus GN=DMP1 PE=2 SV=1	tr|Q75P25|Q75P25_CHICK	K.QAAELDDDDC(+57.02)QDGY	Y	58.37	1613.58	14	0.4	807.797	2	18.37		F36:213	2	416	429	Carbamidomethylation	C10:Carbamidomethylation:1000.00
Sample 2	10	25	Matrix Gla protein OS=Gallus gallus GN=MGP PE=2 SV=1	O42413|MGP_CHICK	R.AN(+.98)GFIRDDTGLR.A	Y	40.2	1334.66	12	0.3	445.893	3	18.4		F36:214	4	41	52	Deamidation (NQ)	N2:Deamidation (NQ):1000.00
Sample 2	7	20	Vitronectin OS=Gallus gallus PE=2 SV=1	tr|O12945|O12945_CHICK	K.RVDLVQPPYPR.S	Y	39.89	1338.74	11	0.3	670.378	2	18.95		F36:230	2	426	436
Sample 2	7	21	Uncharacterized protein OS=Gallus gallus GN=VTN PE=4 SV=2	tr|E1C7A7|E1C7A7_CHICK	K.RVDLVQPPYPR.S	Y	39.89	1338.74	11	0.3	670.378	2	18.95		F36:230	2	426	436
Sample 2	5	4	Collagen alpha-1(I) chain OS=Gallus gallus GN=COL1A1 PE=1 SV=3	P02457|CO1A1_CHICK	R.FTYGVTEDGC(+57.02)TSHTGAWGK.T	Y	67.06	2072.89	19	1.5	1037.45	2	19.15		F36:236	4	1395	1413	Carbamidomethylation	C10:Carbamidomethylation:1000.00
Sample 2	3	3	Serum albumin OS=Gallus gallus GN=ALB PE=1 SV=2	P19121|ALBU_CHICK	R.IAKGYESLLEK.C	Y	51.66	1249.69	11	1	625.854	2	19.18		F36:237	2	377	387
Sample 2	2	8	SPARC OS=Gallus gallus GN=SPARC PE=4 SV=1	tr|F1P291|F1P291_CHICK	K.LHLDYIGPC(+57.02)K.F	Y	53.08	1214.61	10	0.5	608.313	2	19.51		F36:244	2	136	145	Carbamidomethylation	C9:Carbamidomethylation:1000.00
Sample 2	4	7	Uncharacterized protein OS=Gallus gallus GN=AHSG PE=4 SV=1	tr|E1BZE1|E1BZE1_CHICK	R.FALNRIEQVR.V	Y	38.84	1244.7	10	0.5	415.907	3	19.79		F36:254	7	55	64
Sample 2	4	7	Uncharacterized protein OS=Gallus gallus GN=AHSG PE=4 SV=1	tr|E1BZE1|E1BZE1_CHICK	A.LNRIEQVR.V	Y	32.04	1026.59	8	0.8	514.304	2	19.87		F36:257	2	57	64
Sample 2	4	7	Uncharacterized protein OS=Gallus gallus GN=AHSG PE=4 SV=1	tr|E1BZE1|E1BZE1_CHICK	F.ALNRIEQVR.V	Y	19.27	1097.63	9	0.4	549.823	2	19.94		F36:259	1	56	64
Sample 2	4	7	Uncharacterized protein OS=Gallus gallus GN=AHSG PE=4 SV=1	tr|E1BZE1|E1BZE1_CHICK	R.AAAEVAQHDKVPHPVGFVPPPPLCPGK(+57.02).I	Y	29.14	2814.46	27	0.3	704.624	4	20.07		F36:263	3	312	338	Carbamidomethylation (DHKE X@N-term)	K27:Carbamidomethylation (DHKE X@N-term):72.94
Sample 2	4	7	Uncharacterized protein OS=Gallus gallus GN=AHSG PE=4 SV=1	tr|E1BZE1|E1BZE1_CHICK	R.AAAEVAQHDKVPHPVGFVPPPPLC(+57.02)PGK.I	Y	59.36	2814.46	27	1.1	939.163	3	20.12		F36:265	7	312	338	Carbamidomethylation	C24:Carbamidomethylation:1000.00
Sample 2	1	6	Apolipoprotein A-I OS=Gallus gallus GN=APOA1 PE=1 SV=2	P08250|APOA1_CHICK	K.WTEELEQYR.Q	Y	48.6	1252.57	9	0.6	627.294	2	20.63		F36:280	2	131	139
Sample 2	7	20	Vitronectin OS=Gallus gallus PE=2 SV=1	tr|O12945|O12945_CHICK	R.GVPNQLDAAMAGR.I	Y	53.13	1298.64	13	0.5	650.328	2	20.65		F36:281	2	338	350
Sample 2	7	21	Uncharacterized protein OS=Gallus gallus GN=VTN PE=4 SV=2	tr|E1C7A7|E1C7A7_CHICK	R.GVPNQLDAAMAGR.I	Y	53.13	1298.64	13	0.5	650.328	2	20.65		F36:281	2	338	350
Sample 2	3	3	Serum albumin OS=Gallus gallus GN=ALB PE=1 SV=2	P19121|ALBU_CHICK	K.GYESLLEK.C	Y	38.62	937.476	8	0.2	469.745	2	20.68		F36:282	2	380	387
Sample 2	1	6	Apolipoprotein A-I OS=Gallus gallus GN=APOA1 PE=1 SV=2	P08250|APOA1_CHICK	K.W(+29.97)TEELEQYR.Q	Y	21.64	1282.55	9	0	642.28	2	20.71		F36:283	1	131	139	Quinone	W1:Quinone:104.80
Sample 2	3	3	Serum albumin OS=Gallus gallus GN=ALB PE=1 SV=2	P19121|ALBU_CHICK	K.TNC(+57.02)DLLHDHGEADFLK.S	Y	33.92	1883.85	16	0.3	628.957	3	20.92		F36:290	2	418	433	Carbamidomethylation	C3:Carbamidomethylation:1000.00
Sample 2	7	20	Vitronectin OS=Gallus gallus PE=2 SV=1	tr|O12945|O12945_CHICK	R.FDDGALDPGYPR.D	Y	48.09	1321.59	12	0.9	661.805	2	20.98		F36:292	2	228	239
Sample 2	7	21	Uncharacterized protein OS=Gallus gallus GN=VTN PE=4 SV=2	tr|E1C7A7|E1C7A7_CHICK	R.FDDGALDPGYPR.D	Y	48.09	1321.59	12	0.9	661.805	2	20.98		F36:292	2	228	239
Sample 2	1	6	Apolipoprotein A-I OS=Gallus gallus GN=APOA1 PE=1 SV=2	P08250|APOA1_CHICK	K.LADNLDTLSAAAAK.L	Y	59.65	1372.72	14	0.7	687.368	2	21.19		F36:298	4	69	82
Sample 2	4	7	Uncharacterized protein OS=Gallus gallus GN=AHSG PE=4 SV=1	tr|E1BZE1|E1BZE1_CHICK	A.Q(-17.03)HDKVPHPVGFVPPPPLC(+57.02)PGK.I	Y	37.52	2285.18	21	1	762.734	3	21.22		F36:299	4	318	338	Pyro-glu from Q; Carbamidomethylation	Q1:Pyro-glu from Q:1000.00;C18:Carbamidomethylation:1000.00
Sample 2	3	3	Serum albumin OS=Gallus gallus GN=ALB PE=1 SV=2	P19121|ALBU_CHICK	R.MMSNLC(+57.02)SQQDVFSGK.I	Y	56.54	1730.74	15	0.9	866.379	2	21.49		F36:308	4	288	302	Carbamidomethylation	C6:Carbamidomethylation:1000.00
Sample 2	1	6	Apolipoprotein A-I OS=Gallus gallus GN=APOA1 PE=1 SV=2	P08250|APOA1_CHICK	K.ASGKDAIAQFESSAVGK.Q	Y	63.15	1664.84	17	0.3	833.426	2	21.52		F36:309	5	47	63
Sample 2	3	3	Serum albumin OS=Gallus gallus GN=ALB PE=1 SV=2	P19121|ALBU_CHICK	R.M(+15.99)M(+15.99)SNLC(+57.02)SQQDVFSGK.I	Y	49.31	1762.73	15	0.4	882.374	2	21.63		F36:313	2	288	302	Oxidation (M); Carbamidomethylation	M1:Oxidation (M):1000.00;M2:Oxidation (M):1000.00;C6:Carbamidomethylation:1000.00
Sample 2	3	3	Serum albumin OS=Gallus gallus GN=ALB PE=1 SV=2	P19121|ALBU_CHICK	M.M(+134.05)SNLC(+57.02)SQQDVFSGK.I	Y	40.18	1733.75	14	-3.3	867.88	2	21.67		F36:314	1	289	302	3-methyl-2-pyridyl isocyanate; Carbamidomethylation	M1:3-methyl-2-pyridyl isocyanate:1000.00;C5:Carbamidomethylation:1000.00
Sample 2	2	8	SPARC OS=Gallus gallus GN=SPARC PE=4 SV=1	tr|F1P291|F1P291_CHICK	Y.LSHTELAPLRAPLIPMEHC(+57.02)TTR.F	Y	54.25	2542.31	22	0.3	636.586	4	21.76		F36:317	3	242	263	Carbamidomethylation	C19:Carbamidomethylation:1000.00
Sample 2	6	618	Uncharacterized protein OS=Gallus gallus GN=COL11A1 PE=4 SV=2	tr|F1P4K9|F1P4K9_CHICK	K.G(+42.01)NPGPV.G	Y	22.73	581.281	6	7.1	582.292	1	21.82		F36:319	4	1307	1312	Acetylation (N-term)	G1:Acetylation (N-term):1000.00
Sample 2	2	8	SPARC OS=Gallus gallus GN=SPARC PE=4 SV=1	tr|F1P291|F1P291_CHICK	K.RLEAGDHTVELL.A	Y	29.57	1351.71	12	0.5	676.862	2	21.85		F36:320	4	200	211
Sample 2	3	3	Serum albumin OS=Gallus gallus GN=ALB PE=1 SV=2	P19121|ALBU_CHICK	K.TDNPAEC(+57.02)YANAQEQLNQHIK.E	Y	44.38	2343.05	20	1.7	782.027	3	21.88		F36:321	2	391	410	Carbamidomethylation	C7:Carbamidomethylation:1000.00
Sample 2	3	3	Serum albumin OS=Gallus gallus GN=ALB PE=1 SV=2	P19121|ALBU_CHICK	K.ADPERNEC(+57.02)FLSFK.V	Y	47.94	1611.74	13	1	806.876	2	22.02		F36:325	4	121	133	Carbamidomethylation	C8:Carbamidomethylation:1000.00
Sample 2	8	19	Uncharacterized protein OS=Gallus gallus GN=SERPINF1 PE=3 SV=1	tr|E1C7H6|E1C7H6_CHICK	K.AVLELT(sub N)EDGEKSTPNPGVNAA.R	Y	29.96	2111.04	21	0.2	1056.53	2	22.14		F36:329	1	363	383	Mutation
Sample 2	4	7	Uncharacterized protein OS=Gallus gallus GN=AHSG PE=4 SV=1	tr|E1BZE1|E1BZE1_CHICK	K.C(+57.02)HSHADS(+79.97)AEDIREVC(+57.02)PNC(+57.02)PLLA.N	Y	35.09	2630.07	22	0.3	877.698	3	22.22		F36:331	1	129	150	Carbamidomethylation; Phosphorylation (STY)	C1:Carbamidomethylation:1000.00;S7:Phosphorylation (STY):0.00;C15:Carbamidomethylation:1000.00;C18:Carbamidomethylation:1000.00
Sample 2	1	6	Apolipoprotein A-I OS=Gallus gallus GN=APOA1 PE=1 SV=2	P08250|APOA1_CHICK	R.IRDM(+15.99)VDVYLETVK.A	Y	44.16	1595.82	13	0.9	798.919	2	22.35		F36:334	5	34	46	Oxidation (M)	M4:Oxidation (M):1000.00
Sample 2	1	6	Apolipoprotein A-I OS=Gallus gallus GN=APOA1 PE=1 SV=2	P08250|APOA1_CHICK	R.IRD(+15.99)MVDVYLETVK.A	Y	39.67	1595.82	13	0.5	532.948	3	22.45		F36:337	1	34	46	Oxidation or Hydroxylation	D3:Oxidation or Hydroxylation:0.00
Sample 2	4	7	Uncharacterized protein OS=Gallus gallus GN=AHSG PE=4 SV=1	tr|E1BZE1|E1BZE1_CHICK	K.MVTEPSQDLIAEC(+57.02)Q.L	Y	35.09	1619.72	14	1.1	810.867	2	22.75		F36:344	2	235	248	Carbamidomethylation	C13:Carbamidomethylation:1000.00
Sample 2	20	1201	Transthyretin OS=Gallus gallus GN=TTR PE=1 SV=1	P27731|TTHY_CHICK	K.AADGTWQDFATGK.T	Y	55.51	1366.62	13	0.6	684.315	2	22.81		F36:346	2	59	71
Sample 2	27	23	Uncharacterized protein OS=Gallus gallus GN=PIT54 PE=4 SV=2	tr|H9KZK6|H9KZK6_CHICK	K.QLGC(+57.02)GDAVLAPIAAK.F	Y	33.38	1482.79	15	1.3	742.401	2	22.87		F36:348	1	217	231	Carbamidomethylation	C4:Carbamidomethylation:1000.00
Sample 2	1	6	Apolipoprotein A-I OS=Gallus gallus GN=APOA1 PE=1 SV=2	P08250|APOA1_CHICK	R.IRD(+15.99)MVDVYLETVKAS.G	Y	42.28	1753.89	15	1.5	877.955	2	22.91		F36:349	1	34	48	Oxidation or Hydroxylation	D3:Oxidation or Hydroxylation:0.00
Sample 2	2	8	SPARC OS=Gallus gallus GN=SPARC PE=4 SV=1	tr|F1P291|F1P291_CHICK	F.GIKEQDIDKDLVI	Y	35.97	1484.81	13	0.6	743.412	2	23		F36:352	4	286	298
Sample 2	3	3	Serum albumin OS=Gallus gallus GN=ALB PE=1 SV=2	P19121|ALBU_CHICK	K.KMPQVPTDLLLETGKK.M	Y	53.24	1797.01	16	0.5	600.01	3	23.03		F36:353	3	442	457
Sample 2	2	8	SPARC OS=Gallus gallus GN=SPARC PE=4 SV=1	tr|F1P291|F1P291_CHICK	H.TELAPLRAPLIPMEHC(+57.02)TTR.F	Y	37.1	2205.14	19	0.6	736.054	3	23.06		F36:354	6	245	263	Carbamidomethylation	C16:Carbamidomethylation:1000.00
Sample 2	3	3	Serum albumin OS=Gallus gallus GN=ALB PE=1 SV=2	P19121|ALBU_CHICK	K.APFSEVSKF.V	Y	37.72	1010.51	9	0.3	506.261	2	23.14		F36:357	1	254	262
Sample 2	1	6	Apolipoprotein A-I OS=Gallus gallus GN=APOA1 PE=1 SV=2	P08250|APOA1_CHICK	K.MTPLVQEFR.E	Y	51.97	1119.57	9	0.7	560.795	2	23.56		F36:371	4	230	238
Sample 2	1	6	Apolipoprotein A-I OS=Gallus gallus GN=APOA1 PE=1 SV=2	P08250|APOA1_CHICK	K.IRPFLDQFSAK.W	Y	57.4	1320.72	11	0.5	441.247	3	23.59		F36:372	8	120	130
Sample 2	9	10	Decorin OS=Gallus gallus GN=DCN PE=1 SV=1	P28675|PGS2_CHICK	K.ISPAAFAPLK.K	Y	53.33	1013.59	10	0.3	507.803	2	23.68		F36:375	1	118	127
Sample 2	9	11	Decorin OS=Gallus gallus GN=DCN PE=4 SV=2	tr|E1BRE9|E1BRE9_CHICK	K.ISPAAFAPLK.K	Y	53.33	1013.59	10	0.3	507.803	2	23.68		F36:375	1	118	127
Sample 2	3	3	Serum albumin OS=Gallus gallus GN=ALB PE=1 SV=2	P19121|ALBU_CHICK	K.QQYFC(+57.02)GILK.Q	Y	44.47	1155.57	9	1.4	578.795	2	24.34		F36:394	4	224	232	Carbamidomethylation	C5:Carbamidomethylation:1000.00
Sample 2	3	3	Serum albumin OS=Gallus gallus GN=ALB PE=1 SV=2	P19121|ALBU_CHICK	R.SQC(+57.02)IM(+15.99)EAEFDEKPADLPSLVEK.Y	Y	56.42	2551.18	22	1.5	851.403	3	24.55		F36:401	2	315	336	Carbamidomethylation; Oxidation (M)	C3:Carbamidomethylation:1000.00;M5:Oxidation (M):1000.00
Sample 2	1	6	Apolipoprotein A-I OS=Gallus gallus GN=APOA1 PE=1 SV=2	P08250|APOA1_CHICK	R.LTPVAQELKELTK.Q	Y	57.88	1468.85	13	0.7	735.433	2	25.08		F36:416	6	142	154
Sample 2	2	8	SPARC OS=Gallus gallus GN=SPARC PE=4 SV=1	tr|F1P291|F1P291_CHICK	K.NVLITLYERDEDNNLLTEKQK.L	Y	38.88	2547.32	21	1.7	850.115	3	25.22		F36:421	1	168	188
Sample 2	1	6	Apolipoprotein A-I OS=Gallus gallus GN=APOA1 PE=1 SV=2	P08250|APOA1_CHICK	T.PVAQELKELTK.Q	Y	32	1254.72	11	0.8	628.367	2	25.42		F36:427	2	144	154
Sample 2	1	6	Apolipoprotein A-I OS=Gallus gallus GN=APOA1 PE=1 SV=2	P08250|APOA1_CHICK	R.LTPVAQELKELTKQ.K	Y	52.86	1596.91	14	0.7	799.462	2	25.9		F36:442	2	142	155
Sample 2	5	4	Collagen alpha-1(I) chain OS=Gallus gallus GN=COL1A1 PE=1 SV=3	P02457|CO1A1_CHICK	K.SGEYWIDPNQGC(+57.02)NLDAIK.V	Y	48.18	2078.94	18	2.4	1040.48	2	26.06		F36:447	2	1260	1277	Carbamidomethylation	C12:Carbamidomethylation:1000.00
Sample 2	9	10	Decorin OS=Gallus gallus GN=DCN PE=1 SV=1	P28675|PGS2_CHICK	K.IDAEGLSGLTNLAK.L	Y	62.18	1400.75	14	0.4	701.383	2	26.23		F36:452	2	234	247
Sample 2	9	11	Decorin OS=Gallus gallus GN=DCN PE=4 SV=2	tr|E1BRE9|E1BRE9_CHICK	K.IDAEGLSGLTNLAK.L	Y	62.18	1400.75	14	0.4	701.383	2	26.23		F36:452	2	234	247
Sample 2	11	26	Secreted phosphoprotein 24 OS=Gallus gallus GN=SPP2 PE=4 SV=1	tr|F1P4U3|F1P4U3_CHICK	Q.TWGPNLYGVVR.S	Y	45.86	1260.66	11	0.8	631.338	2	26.33		F36:455	2	55	65
Sample 2	11	27	Secreted phosphoprotein 24 OS=Gallus gallus GN=SPP2 PE=2 SV=1	Q710A0|SPP24_CHICK	Q.TWGPNLYGVVR.S	Y	45.86	1260.66	11	0.8	631.338	2	26.33		F36:455	2	55	65
Sample 2	3	3	Serum albumin OS=Gallus gallus GN=ALB PE=1 SV=2	P19121|ALBU_CHICK	R.SQC(+57.02)IMEAEFDEKPADLPSLVEK.Y	Y	57.79	2535.19	22	0.9	846.071	3	26.51		F36:460	4	315	336	Carbamidomethylation	C3:Carbamidomethylation:1000.00
Sample 2	11	26	Secreted phosphoprotein 24 OS=Gallus gallus GN=SPP2 PE=4 SV=1	tr|F1P4U3|F1P4U3_CHICK	R.INSQTWGPNLYGVVR.S	Y	57.91	1702.88	15	0.7	852.447	2	26.57		F36:462	2	51	65
Sample 2	11	27	Secreted phosphoprotein 24 OS=Gallus gallus GN=SPP2 PE=2 SV=1	Q710A0|SPP24_CHICK	R.INSQTWGPNLYGVVR.S	Y	57.91	1702.88	15	0.7	852.447	2	26.57		F36:462	2	51	65
Sample 2	8	19	Uncharacterized protein OS=Gallus gallus GN=SERPINF1 PE=3 SV=1	tr|E1C7H6|E1C7H6_CHICK	R.LQSLFTSPDFTK.I	Y	49.18	1382.71	12	1.2	692.362	2	26.66		F36:465	2	337	348
Sample 2	1	6	Apolipoprotein A-I OS=Gallus gallus GN=APOA1 PE=1 SV=2	P08250|APOA1_CHICK	R.IRDMVDVYLETVK.A	Y	60.51	1579.83	13	0.8	790.922	2	26.86		F36:470	6	34	46
Sample 2	4	7	Uncharacterized protein OS=Gallus gallus GN=AHSG PE=4 SV=1	tr|E1BZE1|E1BZE1_CHICK	K.NPDVYLM.L	Y	32.59	850.389	7	0.9	851.398	1	26.92		F36:472	1	172	178
Sample 2	5	4	Collagen alpha-1(I) chain OS=Gallus gallus GN=COL1A1 PE=1 SV=3	P02457|CO1A1_CHICK	K.ALLLQGANEIEIR.A	Y	59.03	1438.81	13	1.1	720.415	2	26.98		F36:474	4	1376	1388
Sample 2	3	3	Serum albumin OS=Gallus gallus GN=ALB PE=1 SV=2	P19121|ALBU_CHICK	R.RHPFLYAPAIL.S	Y	36.82	1296.73	11	0.3	649.375	2	27.16		F36:479	3	173	183
Sample 2	22	616	Uncharacterized protein OS=Gallus gallus GN=THBS1 PE=4 SV=2	tr|F1P0J8|F1P0J8_CHICK	K.GGVNDNFQGLLQNVR.F	Y	59.9	1629.82	15	0.7	815.919	2	27.22		F36:481	1	207	221
Sample 2	1	6	Apolipoprotein A-I OS=Gallus gallus GN=APOA1 PE=1 SV=2	P08250|APOA1_CHICK	R.IRDMVDVYLETVK(-.98).A	Y	25.17	1578.84	13	-6.3	527.285	3	27.37		F36:485	1	34	46	Amidation	K13:Amidation:1000.00
Sample 2	2	8	SPARC OS=Gallus gallus GN=SPARC PE=4 SV=1	tr|F1P291|F1P291_CHICK	K.NVLITLYERDEDNNLLTEK.Q	Y	49.72	2291.16	19	1.3	764.73	3	27.44		F36:487	11	168	186
Sample 2	1	6	Apolipoprotein A-I OS=Gallus gallus GN=APOA1 PE=1 SV=2	P08250|APOA1_CHICK	R.IRDMVDVYLETVKAS.G	Y	43.31	1737.9	15	0.8	869.957	2	27.76		F36:497	2	34	48
Sample 2	8	19	Uncharacterized protein OS=Gallus gallus GN=SERPINF1 PE=3 SV=1	tr|E1C7H6|E1C7H6_CHICK	R.DDTTGTLLFIGK.I	Y	52.47	1279.67	12	0.6	640.841	2	27.88		F36:501	1	403	414
Sample 2	2	8	SPARC OS=Gallus gallus GN=SPARC PE=4 SV=1	tr|F1P291|F1P291_CHICK	A.C(+57.02)LDTELTEFPLR.M	Y	51.72	1492.72	12	1.2	747.37	2	28.11		F36:506	1	150	161	Carbamidomethylation	C1:Carbamidomethylation:1000.00
Sample 2	4	7	Uncharacterized protein OS=Gallus gallus GN=AHSG PE=4 SV=1	tr|E1BZE1|E1BZE1_CHICK	K.DNLAAC(+57.02)QLLPEDQSNFGFCTAK(+57.02).M	Y	29.72	2498.12	22	0.1	1250.07	2	28.27		F36:511	1	213	234	Carbamidomethylation; Carbamidomethylation (DHKE X@N-term)	C6:Carbamidomethylation:1000.00;K22:Carbamidomethylation (DHKE X@N-term):34.82
Sample 2	9	10	Decorin OS=Gallus gallus GN=DCN PE=1 SV=1	P28675|PGS2_CHICK	K.IASIGINDFC(+57.02)PLGYNTK.K	Y	55.27	1881.93	17	0.4	941.972	2	28.56		F36:517	2	302	318	Carbamidomethylation	C10:Carbamidomethylation:1000.00
Sample 2	9	11	Decorin OS=Gallus gallus GN=DCN PE=4 SV=2	tr|E1BRE9|E1BRE9_CHICK	K.IASIGINDFC(+57.02)PLGYNTK.K	Y	55.27	1881.93	17	0.4	941.972	2	28.56		F36:517	2	302	318	Carbamidomethylation	C10:Carbamidomethylation:1000.00
Sample 2	4	7	Uncharacterized protein OS=Gallus gallus GN=AHSG PE=4 SV=1	tr|E1BZE1|E1BZE1_CHICK	K.MVTEPSQDLIAEC(+57.02)QLY.G	Y	20.01	1895.86	16	1.4	948.941	2	28.8		F36:524	1	235	250	Carbamidomethylation	C13:Carbamidomethylation:1000.00
Sample 2	3	3	Serum albumin OS=Gallus gallus GN=ALB PE=1 SV=2	P19121|ALBU_CHICK	K.YVPPPFNPDMFSFDEKLC(+57.02)SAPAEEREVGQMK.L	Y	16.74	3614.65	31	1.9	904.672	4	28.83		F36:525	1	525	555	Carbamidomethylation	C18:Carbamidomethylation:1000.00
Sample 2	2	8	SPARC OS=Gallus gallus GN=SPARC PE=4 SV=1	tr|F1P291|F1P291_CHICK	Y.IFPVHWQFGQLDQHPIDGYLSH.T	Y	20.88	2633.28	22	0.4	878.768	3	28.89		F36:527	2	223	244
Sample 2	9	10	Decorin OS=Gallus gallus GN=DCN PE=1 SV=1	P28675|PGS2_CHICK	F.SNPVQYWEIQPSAFR.C	Y	17.27	1820.88	15	0.2	911.45	2	28.99		F36:530	1	329	343
Sample 2	9	11	Decorin OS=Gallus gallus GN=DCN PE=4 SV=2	tr|E1BRE9|E1BRE9_CHICK	F.SNPVQYWEIQPSAFR.C	Y	17.27	1820.88	15	0.2	911.45	2	28.99		F36:530	1	329	343
Sample 2	1	6	Apolipoprotein A-I OS=Gallus gallus GN=APOA1 PE=1 SV=2	P08250|APOA1_CHICK	K.QLDLKLADNLDTLSAA.A	Y	40.39	1699.9	16	0.9	850.958	2	29.07		F36:532	1	64	79
Sample 2	12	1	Collagen alpha-2(I) chain OS=Gallus gallus GN=COL1A2 PE=4 SV=1	tr|F1P0H9|F1P0H9_CHICK	R.LSHPEWSSGFYWIDPNQGC(+57.02)TADAIR.A	Y	65.01	2906.31	25	0.7	969.777	3	29.41		F36:541	1	1163	1187	Carbamidomethylation	C19:Carbamidomethylation:1000.00
Sample 2	12	5	Collagen alpha-2(I) chain (Fragments) OS=Gallus gallus GN=COL1A2 PE=1 SV=2	P02467|CO1A2_CHICK	R.LSHPEWSSGFYWIDPNQGC(+57.02)TADAIR.A	Y	65.01	2906.31	25	0.7	969.777	3	29.41		F36:541	1	1162	1186	Carbamidomethylation	C19:Carbamidomethylation:1000.00
Sample 2	2	8	SPARC OS=Gallus gallus GN=SPARC PE=4 SV=1	tr|F1P291|F1P291_CHICK	R.FFEAC(+57.02)DLDNDKYIAL.E	Y	37.66	1832.83	15	1.1	917.423	2	29.8		F36:550	4	264	278	Carbamidomethylation	C5:Carbamidomethylation:1000.00
Sample 2	1	6	Apolipoprotein A-I OS=Gallus gallus GN=APOA1 PE=1 SV=2	P08250|APOA1_CHICK	R.LISFLDELQK.S	Y	50.72	1204.67	10	0.6	603.343	2	29.83		F36:551	4	252	261
Sample 2	4	7	Uncharacterized protein OS=Gallus gallus GN=AHSG PE=4 SV=1	tr|E1BZE1|E1BZE1_CHICK	K.ISHNNPVAS(+79.97)ESSSSEFPSLL.S	Y	38.16	2180.96	20	2.4	1091.49	2	30.04		F36:557	1	284	303	Phosphorylation (STY)	S9:Phosphorylation (STY):0.00
Sample 2	2	8	SPARC OS=Gallus gallus GN=SPARC PE=4 SV=1	tr|F1P291|F1P291_CHICK	E.DLTTEGPVGANPVQVEVGEFEEPTEDVEEIVAENPC(+57.02)QNHHC(+57.02)K.H	Y	28.29	4702.11	42	-1.5	1176.53	4	30.53		F36:571	1	32	73	Carbamidomethylation	C36:Carbamidomethylation:1000.00;C41:Carbamidomethylation:1000.00
Sample 2	4	7	Uncharacterized protein OS=Gallus gallus GN=AHSG PE=4 SV=1	tr|E1BZE1|E1BZE1_CHICK	K.DNLAAC(+57.02)QLLPEDQSNFGFC(+57.02)TA.K	Y	21.22	2370.03	21	0.8	791.016	3	31.43		F36:591	1	213	233	Carbamidomethylation	C6:Carbamidomethylation:1000.00;C19:Carbamidomethylation:1000.00
Sample 2	4	7	Uncharacterized protein OS=Gallus gallus GN=AHSG PE=4 SV=1	tr|E1BZE1|E1BZE1_CHICK	K.DNLAAC(+57.02)QLLPEDQSNFGFC(+57.02).T	Y	16.21	2197.94	19	1.2	1099.98	2	31.7		F36:597	1	213	231	Carbamidomethylation	C6:Carbamidomethylation:1000.00;C19:Carbamidomethylation:1000.00
Sample 2	9	10	Decorin OS=Gallus gallus GN=DCN PE=1 SV=1	P28675|PGS2_CHICK	K.IDAEGLSGLTNLAKL.G	Y	51.73	1513.84	15	1	757.926	2	31.76		F36:599	2	234	248
Sample 2	9	11	Decorin OS=Gallus gallus GN=DCN PE=4 SV=2	tr|E1BRE9|E1BRE9_CHICK	K.IDAEGLSGLTNLAKL.G	Y	51.73	1513.84	15	1	757.926	2	31.76		F36:599	2	234	248
Sample 2	4	7	Uncharacterized protein OS=Gallus gallus GN=AHSG PE=4 SV=1	tr|E1BZE1|E1BZE1_CHICK	K.ISHNNPVAS(+79.97)ES(+79.97)SSSEFPSLL.S	Y	27.24	2260.93	20	1.6	1131.47	2	32.53		F36:617	1	284	303	Phosphorylation (STY)	S9:Phosphorylation (STY):14.84;S11:Phosphorylation (STY):10.11
Sample 2	2	8	SPARC OS=Gallus gallus GN=SPARC PE=4 SV=1	tr|F1P291|F1P291_CHICK	K.FIT(sub P)AC(+57.02)LDTELTEFPLR.M	Y	17.78	1924.96	16	6.8	963.494	2	32.83		F36:624	1	146	161	Carbamidomethylation; Mutation	C5:Carbamidomethylation:1000.00
Sample 2	16	34	Tetranectin OS=Gallus gallus GN=CLEC3B PE=2 SV=1	tr|Q9DDD4|Q9DDD4_CHICK	K.C(+57.02)FLAF.S	Y	22.39	656.299	5	0.5	657.307	1	33		F36:629	1	80	84	Carbamidomethylation	C1:Carbamidomethylation:1000.00
Sample 2	19	36	Uncharacterized protein OS=Gallus gallus GN=OMD PE=4 SV=1	tr|R4GF52|R4GF52_CHICK	R.NTFISLPNLIELNLGHNK.L	Y	35.24	2036.11	18	1	679.71	3	33.11		F36:632	1	274	291
Sample 2	2	8	SPARC OS=Gallus gallus GN=SPARC PE=4 SV=1	tr|F1P291|F1P291_CHICK	K.FIPAC(+57.02)LDTELTEFT(sub P)LR.M	Y	18.79	1924.96	16	6.8	963.494	2	33.21		F36:635	1	146	161	Carbamidomethylation; Mutation	C5:Carbamidomethylation:1000.00
Sample 2	3	3	Serum albumin OS=Gallus gallus GN=ALB PE=1 SV=2	P19121|ALBU_CHICK	K.C(+57.02)VANEDAPEC(+57.02)SKPLPSIILDEIC(+57.02)QVEK.L	Y	48.49	3113.47	27	1.6	1038.83	3	33.5		F36:640	6	80	106	Carbamidomethylation	C1:Carbamidomethylation:1000.00;C10:Carbamidomethylation:1000.00;C23:Carbamidomethylation:1000.00
Sample 2	1	6	Apolipoprotein A-I OS=Gallus gallus GN=APOA1 PE=1 SV=2	P08250|APOA1_CHICK	R.LISFLDELQKSVA	Y	40.99	1461.81	13	1.4	731.912	2	33.53		F36:641	3	252	264
Sample 2	6	618	Uncharacterized protein OS=Gallus gallus GN=COL11A1 PE=4 SV=2	tr|F1P4K9|F1P4K9_CHICK	R.SPVFLFEDQNGNPAPEDYPLFR.T	Y	29.95	2551.2	22	2.1	851.41	3	33.62		F36:644	2	137	158
Sample 2	12	1	Collagen alpha-2(I) chain OS=Gallus gallus GN=COL1A2 PE=4 SV=1	tr|F1P0H9|F1P0H9_CHICK	R.TNKPSRLPILDIAPLDIGGADQEFGLHIGPVC(+57.02)FK	Y	66.4	3687.94	34	0.9	922.994	4	33.65		F36:645	3	1330	1363	Carbamidomethylation	C32:Carbamidomethylation:1000.00
Sample 2	12	5	Collagen alpha-2(I) chain (Fragments) OS=Gallus gallus GN=COL1A2 PE=1 SV=2	P02467|CO1A2_CHICK	R.TNKPSRLPILDIAPLDIGGADQEFGLHIGPVC(+57.02)FK	Y	66.4	3687.94	34	0.9	922.994	4	33.65		F36:645	3	1329	1362	Carbamidomethylation	C32:Carbamidomethylation:1000.00
Sample 2	6	618	Uncharacterized protein OS=Gallus gallus GN=COL11A1 PE=4 SV=2	tr|F1P4K9|F1P4K9_CHICK	R.ILDEEVFEGEIQQL.L	Y	35.53	1660.82	14	0.6	831.418	2	33.9		F36:650	2	213	226
Sample 2	7	20	Vitronectin OS=Gallus gallus PE=2 SV=1	tr|O12945|O12945_CHICK	K.LISDVWGIEGPIDAAFTR.I	Y	44.24	1959.01	18	1.5	980.514	2	34.9		F36:667	2	193	210
Sample 2	7	21	Uncharacterized protein OS=Gallus gallus GN=VTN PE=4 SV=2	tr|E1C7A7|E1C7A7_CHICK	K.LISDVWGIEGPIDAAFTR.I	Y	44.24	1959.01	18	1.5	980.514	2	34.9		F36:667	2	193	210
Sample 2	1	6	Apolipoprotein A-I OS=Gallus gallus GN=APOA1 PE=1 SV=2	P08250|APOA1_CHICK	H.DEPQTPLDRIRDMVD(+15.99)VYLETVK.A	Y	36.37	2647.32	22	1.4	883.447	3	35.73		F36:682	1	25	46	Oxidation or Hydroxylation	D15:Oxidation or Hydroxylation:28.36
Sample 2	1	6	Apolipoprotein A-I OS=Gallus gallus GN=APOA1 PE=1 SV=2	P08250|APOA1_CHICK	H.DEPQTPLDRIRDM(+15.99)VDVYLETVK.A	Y	25.07	2647.32	22	0.7	662.837	4	35.79		F36:683	1	25	46	Oxidation (M)	M13:Oxidation (M):1000.00
Sample 2	13	617	Uncharacterized protein OS=Gallus gallus GN=KNG1 PE=4 SV=2	tr|E1BX43|E1BX43_CHICK	A.TPLPFEFSDC(+57.02)DDPDVLEAVDTALQK.Y	Y	48.19	2821.3	25	1.5	941.442	3	35.9		F36:686	2	19	43	Carbamidomethylation	C10:Carbamidomethylation:1000.00
Sample 2	2	8	SPARC OS=Gallus gallus GN=SPARC PE=4 SV=1	tr|F1P291|F1P291_CHICK	K.F(+15.99)IP(+15.99)ACLDTELTEFPLR.M	Y	31.41	1895.93	16	0.4	948.975	2	36.68		F36:701	1	146	161	Oxidation or Hydroxylation	F1:Oxidation or Hydroxylation:5.81;P3:Oxidation or Hydroxylation:11.59
Sample 2	15	259	Uncharacterized protein (Fragment) OS=Gallus gallus GN=COL5A1 PE=4 SV=2	tr|F1NI79|F1NI79_CHICK	R.ILDEEVFEGDIQQLLIVADPR.A	Y	39.86	2411.26	21	1.5	804.761	3	39.08		F36:739	2	176	196
Sample 2	15	260	Alpha 1 (V) collagen OS=Gallus gallus PE=2 SV=1	tr|Q9IAU4|Q9IAU4_CHICK	R.ILDEEVFEGDIQQLLIVADPR.A	Y	39.86	2411.26	21	1.5	804.761	3	39.08		F36:739	2	208	228
Sample 2	5	4	Collagen alpha-1(I) chain OS=Gallus gallus GN=COL1A1 PE=1 SV=3	P02457|CO1A1_CHICK	K.TSRLPIIDLAPMD(+15.99)VGAPDQEFGIDIGPVC(+57.02)FL	Y	23.7	3371.68	31	1.1	1124.9	3	39.17		F36:741	1	1423	1453	Oxidation or Hydroxylation; Carbamidomethylation	D13:Oxidation or Hydroxylation:0.00;C29:Carbamidomethylation:1000.00
Sample 2	1	6	Apolipoprotein A-I OS=Gallus gallus GN=APOA1 PE=1 SV=2	P08250|APOA1_CHICK	H.DEPQTPLDRIRDMVDVYLETVK.A	Y	26.47	2631.32	22	-0.1	878.114	3	40.73		F36:755	2	25	46
Sample 2	23	1202	Thrombospondin-2 OS=Gallus gallus GN=THBS2 PE=2 SV=1	P35440|TSP2_CHICK	R.GLLQNIHLIFDTSIEDVLR.K	Y	54.53	2195.2	19	0.3	732.739	3	40.94		F36:758	2	210	228
Sample 2	23	1203	Thrombospondin-2 OS=Gallus gallus GN=THBS2 PE=4 SV=2	tr|E1C3P2|E1C3P2_CHICK	R.GLLQNIHLIFDTSIEDVLR.K	Y	54.53	2195.2	19	0.3	732.739	3	40.94		F36:758	2	245	263
Sample 2	6	618	Uncharacterized protein OS=Gallus gallus GN=COL11A1 PE=4 SV=2	tr|F1P4K9|F1P4K9_CHICK	R.ILDEEVFEGEIQQLLIIADPR.A	Y	37.64	2439.29	21	1.6	814.105	3	41.62		F36:766	2	213	233
Sample 2	2	8	SPARC OS=Gallus gallus GN=SPARC PE=4 SV=1	tr|F1P291|F1P291_CHICK	K.FIPAC(+57.02)LN(sub D)TELTEFPLR.M	Y	25.06	1919.98	16	1.2	960.999	2	42.57		F36:777	1	146	161	Carbamidomethylation; Mutation	C5:Carbamidomethylation:1000.00
Sample 2	4	7	Uncharacterized protein OS=Gallus gallus GN=AHSG PE=4 SV=1	tr|E1BZE1|E1BZE1_CHICK	R.VLFQGPNNEILFLELDLLETT.C	Y	24.78	2417.27	21	1.8	1209.65	2	43.36		F36:785	2	65	85
Sample 2	2	8	SPARC OS=Gallus gallus GN=SPARC PE=4 SV=1	tr|F1P291|F1P291_CHICK	K.FIPAC(+57.02)LDTELTEFPLR.M	Y	61.65	1920.97	16	1.8	961.492	2	47.09		F36:829	16	146	161	Carbamidomethylation	C5:Carbamidomethylation:1000.00
Sample 2	3	3	Serum albumin OS=Gallus gallus GN=ALB PE=1 SV=2	P19121|ALBU_CHICK	K.LC(+57.02)SAPAEEREVGQM(+15.99)K.L	Y	23.2	1719.79	15	0.3	574.271	3	12.82		F36:93	1	541	555	Carbamidomethylation; Oxidation (M)	C2:Carbamidomethylation:1000.00;M14:Oxidation (M):1000.00
