# Supplementary material for: Bone protein “extractomics”: comparing the efficiency of bone protein extractions of Gallus gallus in tandem mass spectrometry, with an eye towards paleoproteomics
Source: PeerJ. 2016 Oct 27;4:e2603. doi: 10.7717/peerj.2603 (PMC5088622; doi:10.7717/peerj.2603)
Supplement: Table S13 [file peerj-04-2603-s017.xlsx]

## Sheet: Peptides
Table S13. Peptides identified in samples from Method 7, dialyzed EDTA-2 (20 mL/g), post-NaOH (2nd incubation) (20-N/EDTA2-D) @ 1% FDR
Sample #	Protein Group	Protein ID	Protein Description	Protein Accession	Peptide	Unique	-10lgP	Mass	Length	ppm	m/z	z	RT	Area	Scan	#Spec	Start	End	PTM	AScore
Sample 1	20	1202	Thrombospondin-2 OS=Gallus gallus GN=THBS2 PE=2 SV=1	P35440|TSP2_CHICK	R.LC(+57.02)NSPEPQYGGKPCVGD(+57.02)TK.Q	Y	20.82	2105.95	19	0.9	702.991	3	14.15		F37:112	1	526	544	Carbamidomethylation; Carbamidomethylation (DHKE X@N-term)	C2:Carbamidomethylation:1000.00;D17:Carbamidomethylation (DHKE X@N-term):0.00
Sample 1	20	1203	Thrombospondin-2 OS=Gallus gallus GN=THBS2 PE=4 SV=2	tr|E1C3P2|E1C3P2_CHICK	R.LC(+57.02)NSPEPQYGGKPCVGD(+57.02)TK.Q	Y	20.82	2105.95	19	0.9	702.991	3	14.15		F37:112	1	561	579	Carbamidomethylation; Carbamidomethylation (DHKE X@N-term)	C2:Carbamidomethylation:1000.00;D17:Carbamidomethylation (DHKE X@N-term):0.00
Sample 1	1	6	Apolipoprotein A-I OS=Gallus gallus GN=APOA1 PE=1 SV=2	P08250|APOA1_CHICK	K.LREDM(+15.99)APYYK.E	Y	39.49	1300.61	10	0.8	434.545	3	14.21		F37:113	3	83	92	Oxidation (M)	M5:Oxidation (M):1000.00
Sample 1	5	7	Uncharacterized protein OS=Gallus gallus GN=AHSG PE=4 SV=1	tr|E1BZE1|E1BZE1_CHICK	R.TFAEHAVEGDC(+57.02)DVK.L	Y	54.46	1576.68	14	0.9	789.349	2	14.42		F37:119	2	101	114	Carbamidomethylation	C11:Carbamidomethylation:1000.00
Sample 1	2	2	Serum albumin OS=Gallus gallus GN=ALB PE=4 SV=2	tr|F2Z4L6|F2Z4L6_CHICK	R.KQETTPINDN(+.98)VSQC(+57.02)C(+57.02)SSSYANR.R	Y	42.86	2559.1	22	6.6	1280.56	2	14.73		F37:128	1	441	462	Deamidation (NQ); Carbamidomethylation	N10:Deamidation (NQ):0.00;C14:Carbamidomethylation:1000.00;C15:Carbamidomethylation:1000.00
Sample 1	2	2	Serum albumin OS=Gallus gallus GN=ALB PE=4 SV=2	tr|F2Z4L6|F2Z4L6_CHICK	F.DEKLC(+57.02)SAPAEEREVGQMK.L	N	22.89	2075.96	18	0.7	692.995	3	15.23		F37:137	1	488	505	Carbamidomethylation	C5:Carbamidomethylation:1000.00
Sample 1	3	3	Serum albumin OS=Gallus gallus GN=ALB PE=1 SV=2	P19121|ALBU_CHICK	F.DEKLC(+57.02)SAPAEEREVGQMK.L	N	22.89	2075.96	18	0.7	692.995	3	15.23		F37:137	1	538	555	Carbamidomethylation	C5:Carbamidomethylation:1000.00
Sample 1	25	13	Uncharacterized protein OS=Gallus gallus GN=DMP1 PE=4 SV=2	tr|F1NUV7|F1NUV7_CHICK	R.KQAAELDDDDC(+57.02)QDGY	Y	46.69	1741.67	15	1.2	871.845	2	15.46		F37:142	1	415	429	Carbamidomethylation	C11:Carbamidomethylation:1000.00
Sample 1	25	24	Dentin matrix protein 1 OS=Gallus gallus GN=DMP1 PE=2 SV=1	tr|Q75P25|Q75P25_CHICK	R.KQAAELDDDDC(+57.02)QDGY	Y	46.69	1741.67	15	1.2	871.845	2	15.46		F37:142	1	415	429	Carbamidomethylation	C11:Carbamidomethylation:1000.00
Sample 1	8	25	Matrix Gla protein OS=Gallus gallus GN=MGP PE=2 SV=1	O42413|MGP_CHICK	Q.RAN(+.98)GFIRDDTGLR.A	Y	41.53	1490.76	13	0.6	497.927	3	15.87		F37:151	5	40	52	Deamidation (NQ)	N3:Deamidation (NQ):1000.00
Sample 1	1	6	Apolipoprotein A-I OS=Gallus gallus GN=APOA1 PE=1 SV=2	P08250|APOA1_CHICK	K.VM(+15.99)EQLSNLR.E	Y	36.46	1104.56	9	0.6	553.288	2	15.9		F37:152	2	219	227	Oxidation (M)	M2:Oxidation (M):1000.00
Sample 1	1	6	Apolipoprotein A-I OS=Gallus gallus GN=APOA1 PE=1 SV=2	P08250|APOA1_CHICK	R.AELTKDLEEVKEK.I	Y	54.87	1530.81	13	0.9	766.415	2	15.98		F37:155	4	107	119
Sample 1	1	6	Apolipoprotein A-I OS=Gallus gallus GN=APOA1 PE=1 SV=2	P08250|APOA1_CHICK	K.LREDMAPYYK.E	Y	47.06	1284.62	10	0.9	643.317	2	16.15		F37:160	6	83	92
Sample 1	1	6	Apolipoprotein A-I OS=Gallus gallus GN=APOA1 PE=1 SV=2	P08250|APOA1_CHICK	K.LREDMAP(+13.98)YYK.E	Y	22.44	1298.6	10	-0.3	650.305	2	16.17		F37:161	1	83	92	Proline oxidation to pyroglutamic acid	P7:Proline oxidation to pyroglutamic acid:1000.00
Sample 1	1	6	Apolipoprotein A-I OS=Gallus gallus GN=APOA1 PE=1 SV=2	P08250|APOA1_CHICK	R.ERLTPYAENLK.N	Y	39.32	1332.7	11	0.6	667.36	2	16.44		F37:170	1	239	249
Sample 1	1	6	Apolipoprotein A-I OS=Gallus gallus GN=APOA1 PE=1 SV=2	P08250|APOA1_CHICK	K.VMEQLSNLREK.M	Y	32.38	1345.7	11	0.8	673.859	2	16.47		F37:171	1	219	229
Sample 1	15	618	Uncharacterized protein OS=Gallus gallus GN=COL11A1 PE=4 SV=2	tr|F1P4K9|F1P4K9_CHICK	K.SITMIVDC(+57.02)NKK.T	Y	31.97	1307.66	11	0.5	654.837	2	16.49		F37:172	1	178	188	Carbamidomethylation	C8:Carbamidomethylation:1000.00
Sample 1	1	6	Apolipoprotein A-I OS=Gallus gallus GN=APOA1 PE=1 SV=2	P08250|APOA1_CHICK	K.NLAPYSDELRQK.L	Y	42.52	1432.73	12	0.6	717.373	2	16.7		F37:178	5	185	196
Sample 1	1	6	Apolipoprotein A-I OS=Gallus gallus GN=APOA1 PE=1 SV=2	P08250|APOA1_CHICK	R.LTPVAQELK.E	Y	37.23	997.581	9	0.8	499.798	2	16.72		F37:179	4	142	150
Sample 1	7	4	Collagen alpha-1(I) chain OS=Gallus gallus GN=COL1A1 PE=1 SV=3	P02457|CO1A1_CHICK	R.DRDLEVDTTLK.S	Y	49.72	1303.66	11	0.9	652.839	2	16.75		F37:180	2	1215	1225
Sample 1	1	6	Apolipoprotein A-I OS=Gallus gallus GN=APOA1 PE=1 SV=2	P08250|APOA1_CHICK	K.NLAP(+13.98)YSDELRQK.L	Y	21.95	1446.71	12	2.8	724.364	2	16.87		F37:184	1	185	196	Proline oxidation to pyroglutamic acid	P4:Proline oxidation to pyroglutamic acid:1000.00
Sample 1	1	6	Apolipoprotein A-I OS=Gallus gallus GN=APOA1 PE=1 SV=2	P08250|APOA1_CHICK	R.LTPYAENLK.N	Y	37.52	1047.56	9	0.4	524.788	2	16.96		F37:187	2	241	249
Sample 1	1	6	Apolipoprotein A-I OS=Gallus gallus GN=APOA1 PE=1 SV=2	P08250|APOA1_CHICK	R.LTPY(+15.99)AENLK.N	Y	31.34	1063.55	9	1	532.785	2	17.04		F37:190	1	241	249	Oxidation or Hydroxylation	Y4:Oxidation or Hydroxylation:17.01
Sample 1	4	8	SPARC OS=Gallus gallus GN=SPARC PE=4 SV=1	tr|F1P291|F1P291_CHICK	C.QDPSSC(+57.02)PATSGV(sub I)FEK.V	Y	46.06	1608.71	15	0.9	805.362	2	17.17		F37:194	3	91	105	Carbamidomethylation; Mutation	C6:Carbamidomethylation:1000.00
Sample 1	1	6	Apolipoprotein A-I OS=Gallus gallus GN=APOA1 PE=1 SV=2	P08250|APOA1_CHICK	R.IRDM(+15.99)VDVY.L	Y	19.18	1025.49	8	0.5	513.75	2	17.26		F37:197	2	34	41	Oxidation (M)	M4:Oxidation (M):1000.00
Sample 1	4	8	SPARC OS=Gallus gallus GN=SPARC PE=4 SV=1	tr|F1P291|F1P291_CHICK	T.LYERDEDNNLLTEK.Q	Y	38.88	1750.84	14	0.8	876.427	2	17.28		F37:198	4	173	186
Sample 1	7	4	Collagen alpha-1(I) chain OS=Gallus gallus GN=COL1A1 PE=1 SV=3	P02457|CO1A1_CHICK	R.GLTGPIGPP(+15.99)GPAGAPGD(+15.99)KGEAGPP(+15.99)GPAGPTGAR.G	Y	55.67	2878.42	33	0.6	960.481	3	17.37		F37:201	1	753	785	Oxidation or Hydroxylation	P9:Oxidation or Hydroxylation:42.68;D17:Oxidation or Hydroxylation:66.16;P24:Oxidation or Hydroxylation:86.52
Sample 1	4	8	SPARC OS=Gallus gallus GN=SPARC PE=4 SV=1	tr|F1P291|F1P291_CHICK	R.APLIPMEHC(+57.02)TTR.F	Y	29.53	1424.69	12	0.7	475.904	3	17.4		F37:202	1	252	263	Carbamidomethylation	C9:Carbamidomethylation:1000.00
Sample 1	7	4	Collagen alpha-1(I) chain OS=Gallus gallus GN=COL1A1 PE=1 SV=3	P02457|CO1A1_CHICK	R.GLTGPIGPP(+15.99)GPAGAP(+15.99)GDKGEAGPP(+15.99)GPAGPTGAR.G	Y	53.06	2878.42	33	1.6	960.482	3	17.49		F37:205	1	753	785	Oxidation or Hydroxylation	P9:Oxidation or Hydroxylation:42.68;P15:Oxidation or Hydroxylation:49.35;P24:Oxidation or Hydroxylation:55.73
Sample 1	7	4	Collagen alpha-1(I) chain OS=Gallus gallus GN=COL1A1 PE=1 SV=3	P02457|CO1A1_CHICK	K.GATGAP(+15.99)GIAGAP(+15.99)GFP(+15.99)GAR.G	Y	51.29	1571.77	18	1.2	786.893	2	17.61		F37:209	1	387	404	Oxidation or Hydroxylation	P6:Oxidation or Hydroxylation:121.82;P12:Oxidation or Hydroxylation:33.18;P15:Oxidation or Hydroxylation:0.00
Sample 1	2	2	Serum albumin OS=Gallus gallus GN=ALB PE=4 SV=2	tr|F2Z4L6|F2Z4L6_CHICK	K.LVKDVVDLAQK.C	N	46.88	1226.72	11	0.8	614.369	2	17.79		F37:214	4	19	29
Sample 1	3	3	Serum albumin OS=Gallus gallus GN=ALB PE=1 SV=2	P19121|ALBU_CHICK	K.LVKDVVDLAQK.C	N	46.88	1226.72	11	0.8	614.369	2	17.79		F37:214	4	69	79
Sample 1	12	10	Decorin OS=Gallus gallus GN=DCN PE=1 SV=1	P28675|PGS2_CHICK	R.ELHLNNNELVR.V	Y	48.27	1349.71	11	1	675.861	2	17.87		F37:217	2	271	281
Sample 1	12	11	Decorin OS=Gallus gallus GN=DCN PE=4 SV=2	tr|E1BRE9|E1BRE9_CHICK	R.ELHLNNNELVR.V	Y	48.27	1349.71	11	1	675.861	2	17.87		F37:217	2	271	281
Sample 1	1	6	Apolipoprotein A-I OS=Gallus gallus GN=APOA1 PE=1 SV=2	P08250|APOA1_CHICK	K.WTEELEQYRQR.L	Y	38.72	1536.73	11	0.9	769.374	2	17.9		F37:218	2	131	141
Sample 1	5	7	Uncharacterized protein OS=Gallus gallus GN=AHSG PE=4 SV=1	tr|E1BZE1|E1BZE1_CHICK	R.TFAEHAVEGDC(+57.02)DVKLQ.K	Y	52.2	1817.83	16	0.8	606.949	3	18.07		F37:223	7	101	116	Carbamidomethylation	C11:Carbamidomethylation:1000.00
Sample 1	8	25	Matrix Gla protein OS=Gallus gallus GN=MGP PE=2 SV=1	O42413|MGP_CHICK	R.AN(+.98)GFIRDDTGLR.A	Y	36.17	1334.66	12	0.3	445.893	3	18.2		F37:228	6	41	52	Deamidation (NQ)	N2:Deamidation (NQ):1000.00
Sample 1	11	1	Collagen alpha-2(I) chain OS=Gallus gallus GN=COL1A2 PE=4 SV=1	tr|F1P0H9|F1P0H9_CHICK	R.GLP(+15.99)GESGAVGPAGPIGSR.G	Y	52.49	1593.81	18	0.7	797.913	2	18.23		F37:229	1	591	608	Oxidation or Hydroxylation	P3:Oxidation or Hydroxylation:115.01
Sample 1	11	5	Collagen alpha-2(I) chain (Fragments) OS=Gallus gallus GN=COL1A2 PE=1 SV=2	P02467|CO1A2_CHICK	R.GLP(+15.99)GESGAVGPAGPIGSR.G	Y	52.49	1593.81	18	0.7	797.913	2	18.23		F37:229	1	590	607	Oxidation or Hydroxylation	P3:Oxidation or Hydroxylation:115.01
Sample 1	4	8	SPARC OS=Gallus gallus GN=SPARC PE=4 SV=1	tr|F1P291|F1P291_CHICK	F.GQLDQHPIDGY.L	Y	19.73	1241.57	11	0.9	621.792	2	18.33		F37:232	2	231	241
Sample 1	14	26	Secreted phosphoprotein 24 OS=Gallus gallus GN=SPP2 PE=4 SV=1	tr|F1P4U3|F1P4U3_CHICK	K.ASGRDPFTC(+57.02)GFK.V	Y	44.98	1341.61	12	1.3	671.815	2	18.43		F37:235	2	95	106	Carbamidomethylation	C9:Carbamidomethylation:1000.00
Sample 1	14	27	Secreted phosphoprotein 24 OS=Gallus gallus GN=SPP2 PE=2 SV=1	Q710A0|SPP24_CHICK	K.ASGRDPFTC(+57.02)GFK.V	Y	44.98	1341.61	12	1.3	671.815	2	18.43		F37:235	2	95	106	Carbamidomethylation	C9:Carbamidomethylation:1000.00
Sample 1	9	69	Bone sialoprotein 2 OS=Gallus gallus GN=IBSP PE=1 SV=1	P79780|SIAL_CHICK	Q.AAGQ(sub E)GLTLGDVGPGGDAASAHQDC(+57.02)K.G	Y	30.04	2352.08	25	-9.4	785.025	3	18.62		F37:241	1	85	109	Carbamidomethylation; Mutation	C24:Carbamidomethylation:1000.00
Sample 1	9	70	Bone sialoprotein 2 OS=Gallus gallus GN=IBSP PE=4 SV=1	tr|F6TAB6|F6TAB6_CHICK	Q.AAGQ(sub E)GLTLGDVGPGGDAASAHQDC(+57.02)K.G	Y	30.04	2352.08	25	-9.4	785.025	3	18.62		F37:241	1	85	109	Carbamidomethylation; Mutation	C24:Carbamidomethylation:1000.00
Sample 1	6	20	Vitronectin OS=Gallus gallus PE=2 SV=1	tr|O12945|O12945_CHICK	K.RVDLVQPPYPR.S	Y	39.22	1338.74	11	0.3	670.378	2	18.64		F37:242	4	426	436
Sample 1	6	21	Uncharacterized protein OS=Gallus gallus GN=VTN PE=4 SV=2	tr|E1C7A7|E1C7A7_CHICK	K.RVDLVQPPYPR.S	Y	39.22	1338.74	11	0.3	670.378	2	18.64		F37:242	4	426	436
Sample 1	9	69	Bone sialoprotein 2 OS=Gallus gallus GN=IBSP PE=1 SV=1	P79780|SIAL_CHICK	Q.AAGEGLTLGDVGPGGDAASAHQDC(+57.02)K.G	Y	51.1	2353.06	25	0.2	1177.54	2	18.7		F37:244	3	85	109	Carbamidomethylation	C24:Carbamidomethylation:1000.00
Sample 1	9	70	Bone sialoprotein 2 OS=Gallus gallus GN=IBSP PE=4 SV=1	tr|F6TAB6|F6TAB6_CHICK	Q.AAGEGLTLGDVGPGGDAASAHQDC(+57.02)K.G	Y	51.1	2353.06	25	0.2	1177.54	2	18.7		F37:244	3	85	109	Carbamidomethylation	C24:Carbamidomethylation:1000.00
Sample 1	9	69	Bone sialoprotein 2 OS=Gallus gallus GN=IBSP PE=1 SV=1	P79780|SIAL_CHICK	A.GEGLTLGDVGPGGDAASAHQDC(+57.02)K.G	Y	53.78	2210.99	23	0.7	1106.5	2	18.73		F37:245	3	87	109	Carbamidomethylation	C22:Carbamidomethylation:1000.00
Sample 1	9	70	Bone sialoprotein 2 OS=Gallus gallus GN=IBSP PE=4 SV=1	tr|F6TAB6|F6TAB6_CHICK	A.GEGLTLGDVGPGGDAASAHQDC(+57.02)K.G	Y	53.78	2210.99	23	0.7	1106.5	2	18.73		F37:245	3	87	109	Carbamidomethylation	C22:Carbamidomethylation:1000.00
Sample 1	2	2	Serum albumin OS=Gallus gallus GN=ALB PE=4 SV=2	tr|F2Z4L6|F2Z4L6_CHICK	R.IAKGYESLLEK.C	N	45.11	1249.69	11	0.7	625.854	2	18.93		F37:251	3	327	337
Sample 1	3	3	Serum albumin OS=Gallus gallus GN=ALB PE=1 SV=2	P19121|ALBU_CHICK	R.IAKGYESLLEK.C	N	45.11	1249.69	11	0.7	625.854	2	18.93		F37:251	3	377	387
Sample 1	7	4	Collagen alpha-1(I) chain OS=Gallus gallus GN=COL1A1 PE=1 SV=3	P02457|CO1A1_CHICK	R.FTYGVTEDGC(+57.02)TSHTGAWGK.T	Y	55.53	2072.89	19	0.8	1037.45	2	18.96		F37:252	4	1395	1413	Carbamidomethylation	C10:Carbamidomethylation:1000.00
Sample 1	9	69	Bone sialoprotein 2 OS=Gallus gallus GN=IBSP PE=1 SV=1	P79780|SIAL_CHICK	A.A(+71.04)GEGLTLGDVGPGGDAASAHQDC(+57.02)K.G	Y	20.26	2353.06	24	0.2	785.361	3	19.06		F37:255	2	86	109	Propionamide (K X@N-term); Carbamidomethylation	A1:Propionamide (K X@N-term):90.02;C23:Carbamidomethylation:1000.00
Sample 1	9	70	Bone sialoprotein 2 OS=Gallus gallus GN=IBSP PE=4 SV=1	tr|F6TAB6|F6TAB6_CHICK	A.A(+71.04)GEGLTLGDVGPGGDAASAHQDC(+57.02)K.G	Y	20.26	2353.06	24	0.2	785.361	3	19.06		F37:255	2	86	109	Propionamide (K X@N-term); Carbamidomethylation	A1:Propionamide (K X@N-term):90.02;C23:Carbamidomethylation:1000.00
Sample 1	4	8	SPARC OS=Gallus gallus GN=SPARC PE=4 SV=1	tr|F1P291|F1P291_CHICK	K.LHLDYIGPC(+57.02)K.F	Y	46.93	1214.61	10	0.5	608.313	2	19.2		F37:259	4	136	145	Carbamidomethylation	C9:Carbamidomethylation:1000.00
Sample 1	4	8	SPARC OS=Gallus gallus GN=SPARC PE=4 SV=1	tr|F1P291|F1P291_CHICK	K.LHLDY(-18.01).I	Y	17.41	641.317	5	0.7	642.325	1	19.26		F37:261	1	136	140	Dehydration	Y5:Dehydration:12.28
Sample 1	2	2	Serum albumin OS=Gallus gallus GN=ALB PE=4 SV=2	tr|F2Z4L6|F2Z4L6_CHICK	F.AVDFEHALQSC(+57.02)C(+57.02)K.E	N	25.82	1563.68	13	0.6	522.235	3	20.05		F37:288	1	136	148	Carbamidomethylation	C11:Carbamidomethylation:1000.00;C12:Carbamidomethylation:1000.00
Sample 1	3	3	Serum albumin OS=Gallus gallus GN=ALB PE=1 SV=2	P19121|ALBU_CHICK	F.AVDFEHALQSC(+57.02)C(+57.02)K.E	N	25.82	1563.68	13	0.6	522.235	3	20.05		F37:288	1	186	198	Carbamidomethylation	C11:Carbamidomethylation:1000.00;C12:Carbamidomethylation:1000.00
Sample 1	5	7	Uncharacterized protein OS=Gallus gallus GN=AHSG PE=4 SV=1	tr|E1BZE1|E1BZE1_CHICK	R.AAAEVAQHDKVPHPVGFVPPPPLC(+57.02)PGK.I	Y	37.91	2814.46	27	1.9	939.164	3	20.16		F37:291	4	312	338	Carbamidomethylation	C24:Carbamidomethylation:1000.00
Sample 1	9	69	Bone sialoprotein 2 OS=Gallus gallus GN=IBSP PE=1 SV=1	P79780|SIAL_CHICK	Q.AAGEGLTLGDVGPGGDAAS(+79.97)AHQDC(+57.02)K.G	Y	40.65	2433.03	25	1.6	812.018	3	20.19		F37:292	2	85	109	Phosphorylation (STY); Carbamidomethylation	S19:Phosphorylation (STY):85.14;C24:Carbamidomethylation:1000.00
Sample 1	9	70	Bone sialoprotein 2 OS=Gallus gallus GN=IBSP PE=4 SV=1	tr|F6TAB6|F6TAB6_CHICK	Q.AAGEGLTLGDVGPGGDAAS(+79.97)AHQDC(+57.02)K.G	Y	40.65	2433.03	25	1.6	812.018	3	20.19		F37:292	2	85	109	Phosphorylation (STY); Carbamidomethylation	S19:Phosphorylation (STY):85.14;C24:Carbamidomethylation:1000.00
Sample 1	6	20	Vitronectin OS=Gallus gallus PE=2 SV=1	tr|O12945|O12945_CHICK	R.GVPNQLDAAMAGR.I	Y	49.5	1298.64	13	0.5	650.328	2	20.3		F37:295	1	338	350
Sample 1	6	21	Uncharacterized protein OS=Gallus gallus GN=VTN PE=4 SV=2	tr|E1C7A7|E1C7A7_CHICK	R.GVPNQLDAAMAGR.I	Y	49.5	1298.64	13	0.5	650.328	2	20.3		F37:295	1	338	350
Sample 1	1	6	Apolipoprotein A-I OS=Gallus gallus GN=APOA1 PE=1 SV=2	P08250|APOA1_CHICK	K.WTEELEQYR.Q	Y	46.6	1252.57	9	1.1	627.294	2	20.32		F37:296	3	131	139
Sample 1	2	2	Serum albumin OS=Gallus gallus GN=ALB PE=4 SV=2	tr|F2Z4L6|F2Z4L6_CHICK	K.GYESLLEK.C	N	35.37	937.476	8	0.5	469.745	2	20.35		F37:297	2	330	337
Sample 1	3	3	Serum albumin OS=Gallus gallus GN=ALB PE=1 SV=2	P19121|ALBU_CHICK	K.GYESLLEK.C	N	35.37	937.476	8	0.5	469.745	2	20.35		F37:297	2	380	387
Sample 1	14	26	Secreted phosphoprotein 24 OS=Gallus gallus GN=SPP2 PE=4 SV=1	tr|F1P4U3|F1P4U3_CHICK	K.VGPFVPTAVC(+57.02)K.S	Y	44.63	1173.62	11	0.8	587.818	2	20.59		F37:305	1	107	117	Carbamidomethylation	C10:Carbamidomethylation:1000.00
Sample 1	14	27	Secreted phosphoprotein 24 OS=Gallus gallus GN=SPP2 PE=2 SV=1	Q710A0|SPP24_CHICK	K.VGPFVPTAVC(+57.02)K.S	Y	44.63	1173.62	11	0.8	587.818	2	20.59		F37:305	1	107	117	Carbamidomethylation	C10:Carbamidomethylation:1000.00
Sample 1	1	6	Apolipoprotein A-I OS=Gallus gallus GN=APOA1 PE=1 SV=2	P08250|APOA1_CHICK	R.EM(+15.99)WLKDTEALR.A	Y	38.88	1406.69	11	0.2	704.351	2	20.64		F37:307	1	96	106	Oxidation (M)	M2:Oxidation (M):1000.00
Sample 1	6	20	Vitronectin OS=Gallus gallus PE=2 SV=1	tr|O12945|O12945_CHICK	R.FDDGALDPGYPR.D	Y	47.79	1321.59	12	1	661.805	2	20.73		F37:310	4	228	239
Sample 1	6	21	Uncharacterized protein OS=Gallus gallus GN=VTN PE=4 SV=2	tr|E1C7A7|E1C7A7_CHICK	R.FDDGALDPGYPR.D	Y	47.79	1321.59	12	1	661.805	2	20.73		F37:310	4	228	239
Sample 1	1	6	Apolipoprotein A-I OS=Gallus gallus GN=APOA1 PE=1 SV=2	P08250|APOA1_CHICK	K.W(+29.97)TEELEQYR.Q	Y	20.54	1282.55	9	0	642.28	2	20.76		F37:311	1	131	139	Quinone	W1:Quinone:70.72
Sample 1	1	6	Apolipoprotein A-I OS=Gallus gallus GN=APOA1 PE=1 SV=2	P08250|APOA1_CHICK	K.LADNLDTLSAAAAK.L	Y	53.38	1372.72	14	0.7	687.368	2	21.11		F37:322	4	69	82
Sample 1	4	8	SPARC OS=Gallus gallus GN=SPARC PE=4 SV=1	tr|F1P291|F1P291_CHICK	K.RLEAGDHTVELL.A	Y	28.45	1351.71	12	0.3	676.862	2	21.14		F37:323	1	200	211
Sample 1	1	6	Apolipoprotein A-I OS=Gallus gallus GN=APOA1 PE=1 SV=2	P08250|APOA1_CHICK	K.ASGKDAIAQFESSAVGK.Q	Y	57.16	1664.84	17	1.3	833.427	2	21.22		F37:326	6	47	63
Sample 1	2	2	Serum albumin OS=Gallus gallus GN=ALB PE=4 SV=2	tr|F2Z4L6|F2Z4L6_CHICK	R.MMSNLC(+57.02)SQQDVFSGK.I	N	50.62	1730.74	15	1	866.38	2	21.37		F37:331	4	238	252	Carbamidomethylation	C6:Carbamidomethylation:1000.00
Sample 1	3	3	Serum albumin OS=Gallus gallus GN=ALB PE=1 SV=2	P19121|ALBU_CHICK	R.MMSNLC(+57.02)SQQDVFSGK.I	N	50.62	1730.74	15	1	866.38	2	21.37		F37:331	4	288	302	Carbamidomethylation	C6:Carbamidomethylation:1000.00
Sample 1	1	6	Apolipoprotein A-I OS=Gallus gallus GN=APOA1 PE=1 SV=2	P08250|APOA1_CHICK	R.IRDMVDVY.L	Y	20.2	1009.49	8	0.5	505.753	2	21.43		F37:333	3	34	41
Sample 1	2	2	Serum albumin OS=Gallus gallus GN=ALB PE=4 SV=2	tr|F2Z4L6|F2Z4L6_CHICK	R.M(+15.99)M(+15.99)SNLC(+57.02)SQQDVFSGK.I	N	45.87	1762.73	15	0.7	882.374	2	21.49		F37:335	2	238	252	Oxidation (M); Carbamidomethylation	M1:Oxidation (M):1000.00;M2:Oxidation (M):1000.00;C6:Carbamidomethylation:1000.00
Sample 1	3	3	Serum albumin OS=Gallus gallus GN=ALB PE=1 SV=2	P19121|ALBU_CHICK	R.M(+15.99)M(+15.99)SNLC(+57.02)SQQDVFSGK.I	N	45.87	1762.73	15	0.7	882.374	2	21.49		F37:335	2	288	302	Oxidation (M); Carbamidomethylation	M1:Oxidation (M):1000.00;M2:Oxidation (M):1000.00;C6:Carbamidomethylation:1000.00
Sample 1	2	2	Serum albumin OS=Gallus gallus GN=ALB PE=4 SV=2	tr|F2Z4L6|F2Z4L6_CHICK	M.M(+134.05)SNLC(+57.02)SQQDVFSGK.I	N	41.85	1733.75	14	-3.3	867.88	2	21.52		F37:336	1	239	252	3-methyl-2-pyridyl isocyanate; Carbamidomethylation	M1:3-methyl-2-pyridyl isocyanate:1000.00;C5:Carbamidomethylation:1000.00
Sample 1	3	3	Serum albumin OS=Gallus gallus GN=ALB PE=1 SV=2	P19121|ALBU_CHICK	M.M(+134.05)SNLC(+57.02)SQQDVFSGK.I	N	41.85	1733.75	14	-3.3	867.88	2	21.52		F37:336	1	289	302	3-methyl-2-pyridyl isocyanate; Carbamidomethylation	M1:3-methyl-2-pyridyl isocyanate:1000.00;C5:Carbamidomethylation:1000.00
Sample 1	2	2	Serum albumin OS=Gallus gallus GN=ALB PE=4 SV=2	tr|F2Z4L6|F2Z4L6_CHICK	K.TDNPAEC(+57.02)YANAQEQLNQHIK.E	N	44.41	2343.05	20	1.2	782.027	3	21.67		F37:340	1	341	360	Carbamidomethylation	C7:Carbamidomethylation:1000.00
Sample 1	3	3	Serum albumin OS=Gallus gallus GN=ALB PE=1 SV=2	P19121|ALBU_CHICK	K.TDNPAEC(+57.02)YANAQEQLNQHIK.E	N	44.41	2343.05	20	1.2	782.027	3	21.67		F37:340	1	391	410	Carbamidomethylation	C7:Carbamidomethylation:1000.00
Sample 1	2	2	Serum albumin OS=Gallus gallus GN=ALB PE=4 SV=2	tr|F2Z4L6|F2Z4L6_CHICK	K.ADPERNEC(+57.02)FLSFK.V	N	45.29	1611.74	13	1.7	806.876	2	21.69		F37:341	2	71	83	Carbamidomethylation	C8:Carbamidomethylation:1000.00
Sample 1	3	3	Serum albumin OS=Gallus gallus GN=ALB PE=1 SV=2	P19121|ALBU_CHICK	K.ADPERNEC(+57.02)FLSFK.V	N	45.29	1611.74	13	1.7	806.876	2	21.69		F37:341	2	121	133	Carbamidomethylation	C8:Carbamidomethylation:1000.00
Sample 1	4	8	SPARC OS=Gallus gallus GN=SPARC PE=4 SV=1	tr|F1P291|F1P291_CHICK	Y.LSHTELAPLRAPLIPMEHC(+57.02)TTR.F	Y	28.03	2542.31	22	0.5	636.586	4	21.78		F37:344	1	242	263	Carbamidomethylation	C19:Carbamidomethylation:1000.00
Sample 1	1	6	Apolipoprotein A-I OS=Gallus gallus GN=APOA1 PE=1 SV=2	P08250|APOA1_CHICK	R.IRDM(+15.99)VDVYLETVK.A	Y	51.35	1595.82	13	0.7	798.919	2	21.98		F37:349	6	34	46	Oxidation (M)	M4:Oxidation (M):1000.00
Sample 1	1	6	Apolipoprotein A-I OS=Gallus gallus GN=APOA1 PE=1 SV=2	P08250|APOA1_CHICK	R.EMWLKDTEALR.A	Y	42.86	1390.69	11	0.9	696.354	2	22.27		F37:358	4	96	106
Sample 1	10	19	Uncharacterized protein OS=Gallus gallus GN=SERPINF1 PE=3 SV=1	tr|E1C7H6|E1C7H6_CHICK	K.LNYEEALGNTVK.E	Y	47.03	1349.68	12	1.1	675.849	2	22.3		F37:359	1	322	333
Sample 1	14	26	Secreted phosphoprotein 24 OS=Gallus gallus GN=SPP2 PE=4 SV=1	tr|F1P4U3|F1P4U3_CHICK	S.SEQIVNVIVR.C	Y	35.96	1155.66	10	0.6	578.838	2	22.32		F37:360	2	124	133
Sample 1	14	27	Secreted phosphoprotein 24 OS=Gallus gallus GN=SPP2 PE=2 SV=1	Q710A0|SPP24_CHICK	S.SEQIVNVIVR.C	Y	35.96	1155.66	10	0.6	578.838	2	22.32		F37:360	2	124	133
Sample 1	5	7	Uncharacterized protein OS=Gallus gallus GN=AHSG PE=4 SV=1	tr|E1BZE1|E1BZE1_CHICK	K.MVTEPSQDLIAEC(+57.02)Q.L	Y	18.96	1619.72	14	1	810.867	2	22.58		F37:368	1	235	248	Carbamidomethylation	C13:Carbamidomethylation:1000.00
Sample 1	26	1201	Transthyretin OS=Gallus gallus GN=TTR PE=1 SV=1	P27731|TTHY_CHICK	K.AADGTWQDFATGK.T	Y	45.51	1366.62	13	0.6	684.315	2	22.61		F37:369	1	59	71
Sample 1	4	8	SPARC OS=Gallus gallus GN=SPARC PE=4 SV=1	tr|F1P291|F1P291_CHICK	T.ELAPLRAPLIPMEHC(+57.02)TTR.F	Y	25.42	2104.09	18	1.2	702.372	3	22.63		F37:370	1	246	263	Carbamidomethylation	C15:Carbamidomethylation:1000.00
Sample 1	1	6	Apolipoprotein A-I OS=Gallus gallus GN=APOA1 PE=1 SV=2	P08250|APOA1_CHICK	R.IRDM(+15.99)VDVYLETVKAS.G	Y	38.33	1753.89	15	1	877.954	2	22.72		F37:373	1	34	48	Oxidation (M)	M4:Oxidation (M):1000.00
Sample 1	2	2	Serum albumin OS=Gallus gallus GN=ALB PE=4 SV=2	tr|F2Z4L6|F2Z4L6_CHICK	K.KMPQVPTDLLLETGKK.M	N	39.73	1797.01	16	0.4	600.01	3	22.76		F37:374	3	392	407
Sample 1	3	3	Serum albumin OS=Gallus gallus GN=ALB PE=1 SV=2	P19121|ALBU_CHICK	K.KMPQVPTDLLLETGKK.M	N	39.73	1797.01	16	0.4	600.01	3	22.76		F37:374	3	442	457
Sample 1	4	8	SPARC OS=Gallus gallus GN=SPARC PE=4 SV=1	tr|F1P291|F1P291_CHICK	H.TELAPLRAPLIPMEHC(+57.02)TTR.F	Y	29.91	2205.14	19	1.4	736.055	3	22.87		F37:378	4	245	263	Carbamidomethylation	C16:Carbamidomethylation:1000.00
Sample 1	2	2	Serum albumin OS=Gallus gallus GN=ALB PE=4 SV=2	tr|F2Z4L6|F2Z4L6_CHICK	K.VSQPDFVQPYQRPASDVIC(+57.02)QEYQDNR.V	N	45.64	3138.45	26	0.2	1047.16	3	22.92		F37:380	2	84	109	Carbamidomethylation	C19:Carbamidomethylation:1000.00
Sample 1	3	3	Serum albumin OS=Gallus gallus GN=ALB PE=1 SV=2	P19121|ALBU_CHICK	K.VSQPDFVQPYQRPASDVIC(+57.02)QEYQDNR.V	N	45.64	3138.45	26	0.2	1047.16	3	22.92		F37:380	2	134	159	Carbamidomethylation	C19:Carbamidomethylation:1000.00
Sample 1	4	8	SPARC OS=Gallus gallus GN=SPARC PE=4 SV=1	tr|F1P291|F1P291_CHICK	F.GIKEQDIDKDLVI	Y	32.03	1484.81	13	0.8	743.412	2	23.14	32500000	F37:387	4	286	298
Sample 1	1	6	Apolipoprotein A-I OS=Gallus gallus GN=APOA1 PE=1 SV=2	P08250|APOA1_CHICK	K.IRPFLDQFSAK.W	Y	48.29	1320.72	11	0.5	441.247	3	23.16	27500000	F37:388	7	120	130
Sample 1	1	6	Apolipoprotein A-I OS=Gallus gallus GN=APOA1 PE=1 SV=2	P08250|APOA1_CHICK	K.M(+15.99)TPLVQEFR.E	Y	44.26	1135.57	9	0.5	568.792	2	23.19	13900000	F37:389	4	230	238	Oxidation (M)	M1:Oxidation (M):1000.00
Sample 1	1	6	Apolipoprotein A-I OS=Gallus gallus GN=APOA1 PE=1 SV=2	P08250|APOA1_CHICK	K.MTPLVQEFR.E	Y	49.43	1119.57	9	0.7	560.795	2	23.33	122000000	F37:394	4	230	238
Sample 1	2	2	Serum albumin OS=Gallus gallus GN=ALB PE=4 SV=2	tr|F2Z4L6|F2Z4L6_CHICK	K.QQYFC(+57.02)GILK.Q	N	39.1	1155.57	9	1	578.795	2	23.98		F37:412	4	174	182	Carbamidomethylation	C5:Carbamidomethylation:1000.00
Sample 1	3	3	Serum albumin OS=Gallus gallus GN=ALB PE=1 SV=2	P19121|ALBU_CHICK	K.QQYFC(+57.02)GILK.Q	N	39.1	1155.57	9	1	578.795	2	23.98		F37:412	4	224	232	Carbamidomethylation	C5:Carbamidomethylation:1000.00
Sample 1	4	8	SPARC OS=Gallus gallus GN=SPARC PE=4 SV=1	tr|F1P291|F1P291_CHICK	R.LEAGDHTVELL.A	Y	27.52	1195.61	11	0.8	598.812	2	24		F37:413	3	201	211
Sample 1	2	2	Serum albumin OS=Gallus gallus GN=ALB PE=4 SV=2	tr|F2Z4L6|F2Z4L6_CHICK	R.SQC(+57.02)IM(+15.99)EAEFDEKPADLPSLVEK.Y	N	54.09	2551.18	22	0.7	851.402	3	24.28		F37:422	2	265	286	Carbamidomethylation; Oxidation (M)	C3:Carbamidomethylation:1000.00;M5:Oxidation (M):1000.00
Sample 1	3	3	Serum albumin OS=Gallus gallus GN=ALB PE=1 SV=2	P19121|ALBU_CHICK	R.SQC(+57.02)IM(+15.99)EAEFDEKPADLPSLVEK.Y	N	54.09	2551.18	22	0.7	851.402	3	24.28		F37:422	2	315	336	Carbamidomethylation; Oxidation (M)	C3:Carbamidomethylation:1000.00;M5:Oxidation (M):1000.00
Sample 1	4	8	SPARC OS=Gallus gallus GN=SPARC PE=4 SV=1	tr|F1P291|F1P291_CHICK	K.EQDIDKDLVI	Y	33.09	1186.61	10	0.5	594.312	2	24.59		F37:430	3	289	298
Sample 1	5	7	Uncharacterized protein OS=Gallus gallus GN=AHSG PE=4 SV=1	tr|E1BZE1|E1BZE1_CHICK	K.LQKVN(+.98)GQFSVL.A	Y	16.41	1232.68	11	0.3	617.346	2	24.71		F37:434	1	115	125	Deamidation (NQ)	N5:Deamidation (NQ):11.10
Sample 1	5	7	Uncharacterized protein OS=Gallus gallus GN=AHSG PE=4 SV=1	tr|E1BZE1|E1BZE1_CHICK	C.QLLPEDQSNFGFC(+57.02)TAK.M	Y	39.19	1853.86	16	0.6	927.939	2	24.89		F37:439	2	219	234	Carbamidomethylation	C13:Carbamidomethylation:1000.00
Sample 1	1	6	Apolipoprotein A-I OS=Gallus gallus GN=APOA1 PE=1 SV=2	P08250|APOA1_CHICK	R.LTPVAQELKELTK.Q	Y	52.43	1468.85	13	0.6	735.433	2	24.92		F37:440	7	142	154
Sample 1	1	6	Apolipoprotein A-I OS=Gallus gallus GN=APOA1 PE=1 SV=2	P08250|APOA1_CHICK	P.V(+314.19)AQELKELTK.Q	Y	20.46	1471.85	10	5.9	736.938	2	25.03		F37:444	2	145	154	Levuglandinyl-lysine anhydrolactam adduct	V1:Levuglandinyl-lysine anhydrolactam adduct:45.16
Sample 1	19	35	Lumican OS=Gallus gallus GN=LUM PE=1 SV=1	P51890|LUM_CHICK	R.ADLPQEMYNC(+57.02)LR.V	Y	40.22	1508.68	12	1.1	755.346	2	25.62		F37:463	1	324	335	Carbamidomethylation	C10:Carbamidomethylation:1000.00
Sample 1	4	8	SPARC OS=Gallus gallus GN=SPARC PE=4 SV=1	tr|F1P291|F1P291_CHICK	L.EEWASC(+57.02)FGIK.E	Y	17.66	1225.54	10	0.2	613.779	2	25.64		F37:464	1	279	288	Carbamidomethylation	C6:Carbamidomethylation:1000.00
Sample 1	1	6	Apolipoprotein A-I OS=Gallus gallus GN=APOA1 PE=1 SV=2	P08250|APOA1_CHICK	R.LTPVAQELKELTKQ.K	Y	47.19	1596.91	14	0.7	799.462	2	25.74		F37:467	3	142	155
Sample 1	2	2	Serum albumin OS=Gallus gallus GN=ALB PE=4 SV=2	tr|F2Z4L6|F2Z4L6_CHICK	K.QSDINTC(+57.02)FGEEGANLIVQSR.A	N	46.53	2237.04	20	0.9	1119.53	2	25.76		F37:468	4	539	558	Carbamidomethylation	C7:Carbamidomethylation:1000.00
Sample 1	3	3	Serum albumin OS=Gallus gallus GN=ALB PE=1 SV=2	P19121|ALBU_CHICK	K.QSDINTC(+57.02)FGEEGANLIVQSR.A	N	46.53	2237.04	20	0.9	1119.53	2	25.76		F37:468	4	589	608	Carbamidomethylation	C7:Carbamidomethylation:1000.00
Sample 1	1	6	Apolipoprotein A-I OS=Gallus gallus GN=APOA1 PE=1 SV=2	P08250|APOA1_CHICK	R.EM(+15.99)WLKDTEALRAELTK.D	Y	39.25	1948.99	16	0.5	650.672	3	25.92		F37:473	1	96	111	Oxidation (M)	M2:Oxidation (M):1000.00
Sample 1	7	4	Collagen alpha-1(I) chain OS=Gallus gallus GN=COL1A1 PE=1 SV=3	P02457|CO1A1_CHICK	K.SGEYWIDPNQGC(+57.02)NLDAIK.V	Y	40.63	2078.94	18	1.1	1040.48	2	25.99		F37:475	2	1260	1277	Carbamidomethylation	C12:Carbamidomethylation:1000.00
Sample 1	16	13409	Prothrombin OS=Gallus gallus PE=2 SV=1	tr|Q91001|Q91001_CHICK	R.VVHGNDAEVGSAPWQVM.L	Y	33.14	1794.84	17	1.3	898.427	2	26.02		F37:476	2	351	367
Sample 1	16	13410	Prothrombin OS=Gallus gallus GN=F2 PE=3 SV=1	tr|F1NXV6|F1NXV6_CHICK	R.VVHGNDAEVGSAPWQVM.L	Y	33.14	1794.84	17	1.3	898.427	2	26.02		F37:476	2	351	367
Sample 1	14	26	Secreted phosphoprotein 24 OS=Gallus gallus GN=SPP2 PE=4 SV=1	tr|F1P4U3|F1P4U3_CHICK	Q.TWGPNLYGVVR.S	Y	42.87	1260.66	11	0.5	631.338	2	26.08		F37:478	1	55	65
Sample 1	14	27	Secreted phosphoprotein 24 OS=Gallus gallus GN=SPP2 PE=2 SV=1	Q710A0|SPP24_CHICK	Q.TWGPNLYGVVR.S	Y	42.87	1260.66	11	0.5	631.338	2	26.08		F37:478	1	55	65
Sample 1	10	19	Uncharacterized protein OS=Gallus gallus GN=SERPINF1 PE=3 SV=1	tr|E1C7H6|E1C7H6_CHICK	R.I(+42.01)IVEK(+42.02).R	Y	15.3	684.417	5	0.9	685.425	1	26.16		F37:480	1	140	144	Acetylation (N-term); Guanidination	I1:Acetylation (N-term):1000.00;K5:Guanidination:1000.00
Sample 1	14	26	Secreted phosphoprotein 24 OS=Gallus gallus GN=SPP2 PE=4 SV=1	tr|F1P4U3|F1P4U3_CHICK	R.INSQTWGPNLYGVVR.S	Y	43.93	1702.88	15	0.5	852.447	2	26.36		F37:486	2	51	65
Sample 1	14	27	Secreted phosphoprotein 24 OS=Gallus gallus GN=SPP2 PE=2 SV=1	Q710A0|SPP24_CHICK	R.INSQTWGPNLYGVVR.S	Y	43.93	1702.88	15	0.5	852.447	2	26.36		F37:486	2	51	65
Sample 1	2	2	Serum albumin OS=Gallus gallus GN=ALB PE=4 SV=2	tr|F2Z4L6|F2Z4L6_CHICK	R.SQC(+57.02)IMEAEFDEKPADLPSLVEK.Y	N	51.02	2535.19	22	0.9	846.071	3	26.45		F37:489	4	265	286	Carbamidomethylation	C3:Carbamidomethylation:1000.00
Sample 1	3	3	Serum albumin OS=Gallus gallus GN=ALB PE=1 SV=2	P19121|ALBU_CHICK	R.SQC(+57.02)IMEAEFDEKPADLPSLVEK.Y	N	51.02	2535.19	22	0.9	846.071	3	26.45		F37:489	4	315	336	Carbamidomethylation	C3:Carbamidomethylation:1000.00
Sample 1	10	19	Uncharacterized protein OS=Gallus gallus GN=SERPINF1 PE=3 SV=1	tr|E1C7H6|E1C7H6_CHICK	R.LQSLFTSPDFTK.I	Y	36.41	1382.71	12	0.2	692.361	2	26.48		F37:490	1	337	348
Sample 1	7	4	Collagen alpha-1(I) chain OS=Gallus gallus GN=COL1A1 PE=1 SV=3	P02457|CO1A1_CHICK	K.ALLLQGANEIEIR.A	Y	49.42	1438.81	13	1.3	720.415	2	26.75		F37:498	4	1376	1388
Sample 1	2	2	Serum albumin OS=Gallus gallus GN=ALB PE=4 SV=2	tr|F2Z4L6|F2Z4L6_CHICK	R.RHPFLYAPAIL.S	N	31.97	1296.73	11	0.3	649.375	2	26.87		F37:502	4	123	133
Sample 1	3	3	Serum albumin OS=Gallus gallus GN=ALB PE=1 SV=2	P19121|ALBU_CHICK	R.RHPFLYAPAIL.S	N	31.97	1296.73	11	0.3	649.375	2	26.87		F37:502	4	173	183
Sample 1	1	6	Apolipoprotein A-I OS=Gallus gallus GN=APOA1 PE=1 SV=2	P08250|APOA1_CHICK	R.IRDMVDVYLETVK.A	Y	53.12	1579.83	13	0.8	790.922	2	26.93		F37:504	7	34	46
Sample 1	4	8	SPARC OS=Gallus gallus GN=SPARC PE=4 SV=1	tr|F1P291|F1P291_CHICK	K.NVLITLYERDEDNNLLTEKQ.K	Y	31.24	2419.22	20	0.1	807.415	3	26.96		F37:505	2	168	187
Sample 1	1	6	Apolipoprotein A-I OS=Gallus gallus GN=APOA1 PE=1 SV=2	P08250|APOA1_CHICK	R.IRDMVDVYLETVK(-.98).A	Y	28.77	1578.84	13	-5.5	527.286	3	27.02		F37:507	1	34	46	Amidation	K13:Amidation:1000.00
Sample 1	4	8	SPARC OS=Gallus gallus GN=SPARC PE=4 SV=1	tr|F1P291|F1P291_CHICK	K.NVLITLYERDEDNNLLTEK.Q	Y	49.08	2291.16	19	0.9	1146.59	2	27.18		F37:512	8	168	186
Sample 1	11	1	Collagen alpha-2(I) chain OS=Gallus gallus GN=COL1A2 PE=4 SV=1	tr|F1P0H9|F1P0H9_CHICK	K.DMATQLAFMR.L	Y	37.56	1182.55	10	0.3	592.284	2	27.37		F37:518	1	1246	1255
Sample 1	11	5	Collagen alpha-2(I) chain (Fragments) OS=Gallus gallus GN=COL1A2 PE=1 SV=2	P02467|CO1A2_CHICK	K.DMATQLAFMR.L	Y	37.56	1182.55	10	0.3	592.284	2	27.37		F37:518	1	1245	1254
Sample 1	2	2	Serum albumin OS=Gallus gallus GN=ALB PE=4 SV=2	tr|F2Z4L6|F2Z4L6_CHICK	K.LLINLIK.R	N	24.56	825.569	7	0.4	826.576	1	27.45		F37:520	7	506	512
Sample 1	3	3	Serum albumin OS=Gallus gallus GN=ALB PE=1 SV=2	P19121|ALBU_CHICK	K.LLINLIK.R	N	24.56	825.569	7	0.4	826.576	1	27.45		F37:520	7	556	562
Sample 1	10	19	Uncharacterized protein OS=Gallus gallus GN=SERPINF1 PE=3 SV=1	tr|E1C7H6|E1C7H6_CHICK	R.DDTTGTLLFIGK.I	Y	41.14	1279.67	12	1.2	640.841	2	27.89		F37:534	2	403	414
Sample 1	4	8	SPARC OS=Gallus gallus GN=SPARC PE=4 SV=1	tr|F1P291|F1P291_CHICK	A.C(+57.02)LDTELTEFPLR.M	Y	46.31	1492.72	12	1.1	747.37	2	28.05		F37:539	2	150	161	Carbamidomethylation	C1:Carbamidomethylation:1000.00
Sample 1	2	2	Serum albumin OS=Gallus gallus GN=ALB PE=4 SV=2	tr|F2Z4L6|F2Z4L6_CHICK	R.MAC(+57.02)SEGYLSIVIH.D	N	49.62	1478.69	13	1.2	740.353	2	28.19		F37:543	2	424	436	Carbamidomethylation	C3:Carbamidomethylation:1000.00
Sample 1	3	3	Serum albumin OS=Gallus gallus GN=ALB PE=1 SV=2	P19121|ALBU_CHICK	R.MAC(+57.02)SEGYLSIVIH.D	N	49.62	1478.69	13	1.2	740.353	2	28.19		F37:543	2	474	486	Carbamidomethylation	C3:Carbamidomethylation:1000.00
Sample 1	4	8	SPARC OS=Gallus gallus GN=SPARC PE=4 SV=1	tr|F1P291|F1P291_CHICK	C.L(+163.05)DTELTEFPLR.M	Y	31.9	1495.74	11	-2.8	748.874	2	28.25		F37:545	1	151	161	Phenethyl isothiocyanate	L1:Phenethyl isothiocyanate:1000.00
Sample 1	5	7	Uncharacterized protein OS=Gallus gallus GN=AHSG PE=4 SV=1	tr|E1BZE1|E1BZE1_CHICK	K.QYHPVQ(sub R)MVSVEFAVA.A	Y	18.26	1703.83	15	0.6	852.925	2	28.31		F37:547	3	188	202	Mutation
Sample 1	2	2	Serum albumin OS=Gallus gallus GN=ALB PE=4 SV=2	tr|F2Z4L6|F2Z4L6_CHICK	L.SFAVDFEHALQ.S	N	24.76	1262.59	11	0.8	632.304	2	28.4		F37:550	2	134	144
Sample 1	3	3	Serum albumin OS=Gallus gallus GN=ALB PE=1 SV=2	P19121|ALBU_CHICK	L.SFAVDFEHALQ.S	N	24.76	1262.59	11	0.8	632.304	2	28.4		F37:550	2	184	194
Sample 1	1	6	Apolipoprotein A-I OS=Gallus gallus GN=APOA1 PE=1 SV=2	P08250|APOA1_CHICK	R.DMVDVYLETVK.A	Y	39.37	1310.64	11	0.6	656.329	2	28.77		F37:561	2	36	46
Sample 1	12	10	Decorin OS=Gallus gallus GN=DCN PE=1 SV=1	P28675|PGS2_CHICK	F.SNPVQYWEIQPSAFR.C	Y	40.66	1820.88	15	0.7	911.45	2	28.8		F37:562	2	329	343
Sample 1	12	11	Decorin OS=Gallus gallus GN=DCN PE=4 SV=2	tr|E1BRE9|E1BRE9_CHICK	F.SNPVQYWEIQPSAFR.C	Y	40.66	1820.88	15	0.7	911.45	2	28.8		F37:562	2	329	343
Sample 1	11	1	Collagen alpha-2(I) chain OS=Gallus gallus GN=COL1A2 PE=4 SV=1	tr|F1P0H9|F1P0H9_CHICK	R.LSHPEWSSGFYWIDPNQGC(+57.02)TADAIR.A	Y	53.2	2906.31	25	1.6	969.778	3	29.3		F37:577	1	1163	1187	Carbamidomethylation	C19:Carbamidomethylation:1000.00
Sample 1	11	5	Collagen alpha-2(I) chain (Fragments) OS=Gallus gallus GN=COL1A2 PE=1 SV=2	P02467|CO1A2_CHICK	R.LSHPEWSSGFYWIDPNQGC(+57.02)TADAIR.A	Y	53.2	2906.31	25	1.6	969.778	3	29.3		F37:577	1	1162	1186	Carbamidomethylation	C19:Carbamidomethylation:1000.00
Sample 1	6	20	Vitronectin OS=Gallus gallus PE=2 SV=1	tr|O12945|O12945_CHICK	R.SIAQYWLDC(+57.02)PQPDEEST	Y	30.5	2037.86	17	0.9	1019.94	2	29.65		F37:587	2	437	453	Carbamidomethylation	C9:Carbamidomethylation:1000.00
Sample 1	6	21	Uncharacterized protein OS=Gallus gallus GN=VTN PE=4 SV=2	tr|E1C7A7|E1C7A7_CHICK	R.SIAQYWLDC(+57.02)PQPDEEST	Y	30.5	2037.86	17	0.9	1019.94	2	29.65		F37:587	2	437	453	Carbamidomethylation	C9:Carbamidomethylation:1000.00
Sample 1	2	2	Serum albumin OS=Gallus gallus GN=ALB PE=4 SV=2	tr|F2Z4L6|F2Z4L6_CHICK	R.VSFLGHFIYSVAR.R	N	48.71	1494.8	13	1	748.407	2	29.74		F37:589	1	110	122
Sample 1	3	3	Serum albumin OS=Gallus gallus GN=ALB PE=1 SV=2	P19121|ALBU_CHICK	R.VSFLGHFIYSVAR.R	N	48.71	1494.8	13	1	748.407	2	29.74		F37:589	1	160	172
Sample 1	1	6	Apolipoprotein A-I OS=Gallus gallus GN=APOA1 PE=1 SV=2	P08250|APOA1_CHICK	R.LISFLDELQK.S	Y	46.25	1204.67	10	0.7	603.343	2	29.87		F37:592	5	252	261
Sample 1	4	8	SPARC OS=Gallus gallus GN=SPARC PE=4 SV=1	tr|F1P291|F1P291_CHICK	R.FFEAC(+57.02)DLDNDKYIAL.E	Y	30.03	1832.83	15	0.8	917.423	2	30.17		F37:602	3	264	278	Carbamidomethylation	C5:Carbamidomethylation:1000.00
Sample 1	10	19	Uncharacterized protein OS=Gallus gallus GN=SERPINF1 PE=3 SV=1	tr|E1C7H6|E1C7H6_CHICK	K.IAQLPLTEGVSAM.F	Y	40.2	1328.7	13	1.4	665.359	2	30.24		F37:604	2	266	278
Sample 1	1	6	Apolipoprotein A-I OS=Gallus gallus GN=APOA1 PE=1 SV=2	P08250|APOA1_CHICK	R.LISFLDELQKS.V	Y	41.39	1291.7	11	0.5	646.859	2	30.46		F37:610	3	252	262
Sample 1	10	19	Uncharacterized protein OS=Gallus gallus GN=SERPINF1 PE=3 SV=1	tr|E1C7H6|E1C7H6_CHICK	R.ALSGNTQLDLQEINNWVR.Q	Y	45.39	2070.05	18	1.1	1036.03	2	30.48		F37:611	3	166	183
Sample 1	1	6	Apolipoprotein A-I OS=Gallus gallus GN=APOA1 PE=1 SV=2	P08250|APOA1_CHICK	R.EM(+15.99)WLKDTEALRAELTKDLEEVKEK.I	Y	34.2	2919.49	24	1.5	584.906	5	30.52		F37:612	2	96	119	Oxidation (M)	M2:Oxidation (M):1000.00
Sample 1	18	34	Tetranectin OS=Gallus gallus GN=CLEC3B PE=2 SV=1	tr|Q9DDD4|Q9DDD4_CHICK	K.AMIDNISQEVALLK.E	Y	51.41	1543.83	14	1	772.922	2	30.61		F37:615	1	48	61
Sample 1	3	3	Serum albumin OS=Gallus gallus GN=ALB PE=1 SV=2	P19121|ALBU_CHICK	K.AVAMITF.A	Y	22.85	751.394	7	0.6	752.402	1	30.77		F37:619	1	48	54
Sample 1	6	20	Vitronectin OS=Gallus gallus PE=2 SV=1	tr|O12945|O12945_CHICK	R.DISEGFEGIPNDIDAAFALPAHSYHGNER.V	Y	50.41	3141.44	29	1.5	786.369	4	31.13		F37:628	4	240	268
Sample 1	6	21	Uncharacterized protein OS=Gallus gallus GN=VTN PE=4 SV=2	tr|E1C7A7|E1C7A7_CHICK	R.DISEGFEGIPNDIDAAFALPAHSYHGNER.V	Y	50.41	3141.44	29	1.5	786.369	4	31.13		F37:628	4	240	268
Sample 1	2	2	Serum albumin OS=Gallus gallus GN=ALB PE=4 SV=2	tr|F2Z4L6|F2Z4L6_CHICK	K.YVPPPFNPDMFSFDEK.L	N	55.79	1928.87	16	0.9	643.963	3	32.01		F37:649	4	475	490
Sample 1	3	3	Serum albumin OS=Gallus gallus GN=ALB PE=1 SV=2	P19121|ALBU_CHICK	K.YVPPPFNPDMFSFDEK.L	N	55.79	1928.87	16	0.9	643.963	3	32.01		F37:649	4	525	540
Sample 1	4	8	SPARC OS=Gallus gallus GN=SPARC PE=4 SV=1	tr|F1P291|F1P291_CHICK	Y.IFPVHWQFGQL.D	Y	20.02	1370.71	11	1.5	686.365	2	32.95		F37:670	1	223	233
Sample 1	4	8	SPARC OS=Gallus gallus GN=SPARC PE=4 SV=1	tr|F1P291|F1P291_CHICK	K.FIP(+13.98)AC(+57.02)LDTELTEFPLR.M	Y	17.58	1934.94	16	2.2	968.482	2	32.98		F37:671	1	146	161	Proline oxidation to pyroglutamic acid; Carbamidomethylation	P3:Proline oxidation to pyroglutamic acid:71.87;C5:Carbamidomethylation:1000.00
Sample 1	4	8	SPARC OS=Gallus gallus GN=SPARC PE=4 SV=1	tr|F1P291|F1P291_CHICK	K.FIPAC(+57.02)LDTELTEFPLR.M	Y	55.24	1920.97	16	1.1	961.491	2	33.05		F37:673	15	146	161	Carbamidomethylation	C5:Carbamidomethylation:1000.00
Sample 1	12	10	Decorin OS=Gallus gallus GN=DCN PE=1 SV=1	P28675|PGS2_CHICK	K.IASIGINDFC(+57.02)PL.G	Y	25.08	1318.66	12	0.5	660.337	2	33.23		F37:678	1	302	313	Carbamidomethylation	C10:Carbamidomethylation:1000.00
Sample 1	12	11	Decorin OS=Gallus gallus GN=DCN PE=4 SV=2	tr|E1BRE9|E1BRE9_CHICK	K.IASIGINDFC(+57.02)PL.G	Y	25.08	1318.66	12	0.5	660.337	2	33.23		F37:678	1	302	313	Carbamidomethylation	C10:Carbamidomethylation:1000.00
Sample 1	5	7	Uncharacterized protein OS=Gallus gallus GN=AHSG PE=4 SV=1	tr|E1BZE1|E1BZE1_CHICK	K.NPDVYLML.L	Y	16.82	963.473	8	1.3	964.482	1	33.44		F37:683	1	172	179
Sample 1	2	2	Serum albumin OS=Gallus gallus GN=ALB PE=4 SV=2	tr|F2Z4L6|F2Z4L6_CHICK	K.C(+57.02)VANEDAPEC(+57.02)SKPLPSIILDEIC(+57.02)QVEK.L	N	41.46	3113.47	27	0.8	779.376	4	33.47		F37:684	5	30	56	Carbamidomethylation	C1:Carbamidomethylation:1000.00;C10:Carbamidomethylation:1000.00;C23:Carbamidomethylation:1000.00
Sample 1	3	3	Serum albumin OS=Gallus gallus GN=ALB PE=1 SV=2	P19121|ALBU_CHICK	K.C(+57.02)VANEDAPEC(+57.02)SKPLPSIILDEIC(+57.02)QVEK.L	N	41.46	3113.47	27	0.8	779.376	4	33.47		F37:684	5	80	106	Carbamidomethylation	C1:Carbamidomethylation:1000.00;C10:Carbamidomethylation:1000.00;C23:Carbamidomethylation:1000.00
Sample 1	15	618	Uncharacterized protein OS=Gallus gallus GN=COL11A1 PE=4 SV=2	tr|F1P4K9|F1P4K9_CHICK	R.SPVFLFEDQNGNPAPEDYPLFR.T	Y	26.24	2551.2	22	2.9	851.41	3	33.5		F37:685	2	137	158
Sample 1	11	1	Collagen alpha-2(I) chain OS=Gallus gallus GN=COL1A2 PE=4 SV=1	tr|F1P0H9|F1P0H9_CHICK	R.TNKPSRLPILDIAPLDIGGADQEFGLHIGPVC(+57.02)FK	Y	51.06	3687.94	34	1.7	922.995	4	33.57		F37:687	3	1330	1363	Carbamidomethylation	C32:Carbamidomethylation:1000.00
Sample 1	11	5	Collagen alpha-2(I) chain (Fragments) OS=Gallus gallus GN=COL1A2 PE=1 SV=2	P02467|CO1A2_CHICK	R.TNKPSRLPILDIAPLDIGGADQEFGLHIGPVC(+57.02)FK	Y	51.06	3687.94	34	1.7	922.995	4	33.57		F37:687	3	1329	1362	Carbamidomethylation	C32:Carbamidomethylation:1000.00
Sample 1	15	618	Uncharacterized protein OS=Gallus gallus GN=COL11A1 PE=4 SV=2	tr|F1P4K9|F1P4K9_CHICK	R.SPVFLFEDQN(+.98)GNPAPEDYPLFR.T	Y	25.62	2552.19	22	1.2	851.737	3	33.75		F37:692	1	137	158	Deamidation (NQ)	N10:Deamidation (NQ):0.00
Sample 1	28	16512	Uncharacterized protein OS=Gallus gallus GN=PROS1 PE=4 SV=1	tr|E1C6L4|E1C6L4_CHICK	K.AINDGLWHIISVEELENSISVK.I	Y	39.6	2465.28	22	0.6	822.768	3	33.92		F37:696	1	376	397
Sample 1	6	20	Vitronectin OS=Gallus gallus PE=2 SV=1	tr|O12945|O12945_CHICK	K.LISDVWGIEGPIDAA.F	Y	15.21	1554.79	15	0.9	778.404	2	34.27		F37:700	1	193	207
Sample 1	6	21	Uncharacterized protein OS=Gallus gallus GN=VTN PE=4 SV=2	tr|E1C7A7|E1C7A7_CHICK	K.LISDVWGIEGPIDAA.F	Y	15.21	1554.79	15	0.9	778.404	2	34.27		F37:700	1	193	207
Sample 1	6	20	Vitronectin OS=Gallus gallus PE=2 SV=1	tr|O12945|O12945_CHICK	K.LISDVWGIEGPIDAAFTR(+.98).I	Y	41.28	1959.99	18	9.1	981.013	2	34.63		F37:707	1	193	210	Deamidation (R)	R18:Deamidation (R):1000.00
Sample 1	6	21	Uncharacterized protein OS=Gallus gallus GN=VTN PE=4 SV=2	tr|E1C7A7|E1C7A7_CHICK	K.LISDVWGIEGPIDAAFTR(+.98).I	Y	41.28	1959.99	18	9.1	981.013	2	34.63		F37:707	1	193	210	Deamidation (R)	R18:Deamidation (R):1000.00
Sample 1	6	20	Vitronectin OS=Gallus gallus PE=2 SV=1	tr|O12945|O12945_CHICK	K.LISDVWGIEGPIDAAFTR.I	Y	45.73	1959.01	18	1.3	980.514	2	34.69		F37:709	4	193	210
Sample 1	6	21	Uncharacterized protein OS=Gallus gallus GN=VTN PE=4 SV=2	tr|E1C7A7|E1C7A7_CHICK	K.LISDVWGIEGPIDAAFTR.I	Y	45.73	1959.01	18	1.3	980.514	2	34.69		F37:709	4	193	210
Sample 1	7	4	Collagen alpha-1(I) chain OS=Gallus gallus GN=COL1A1 PE=1 SV=3	P02457|CO1A1_CHICK	R.LPIIDLAPM.D	Y	15.53	981.557	9	2	982.566	1	35.2		F37:721	1	1426	1434
Sample 1	13	36	Uncharacterized protein OS=Gallus gallus GN=OMD PE=4 SV=1	tr|R4GF52|R4GF52_CHICK	R.EC(+57.02)FC(+57.02)PPEFPLSMY.C	Y	31.43	1675.67	13	0.4	838.844	2	35.35		F37:725	4	64	76	Carbamidomethylation	C2:Carbamidomethylation:1000.00;C4:Carbamidomethylation:1000.00
Sample 1	5	7	Uncharacterized protein OS=Gallus gallus GN=AHSG PE=4 SV=1	tr|E1BZE1|E1BZE1_CHICK	K.NPDVYLMLLEIGR.A	Y	51.03	1531.81	13	1.2	766.912	2	35.59		F37:732	1	172	184
Sample 1	23	617	Uncharacterized protein OS=Gallus gallus GN=KNG1 PE=4 SV=2	tr|E1BX43|E1BX43_CHICK	A.TPLPFEFSDC(+57.02)DDPDVLEAVDTALQK.Y	Y	52.28	2821.3	25	1.3	941.442	3	35.82		F37:737	1	19	43	Carbamidomethylation	C10:Carbamidomethylation:1000.00
Sample 1	23	627	Kinogen HMW (Fragments) OS=Gallus gallus PE=1 SV=1	tr|Q7LZS0|Q7LZS0_CHICK	TPLPFEFSDC(+57.02)DDPDVLEAVDTALQK.Y	Y	52.28	2821.3	25	1.3	941.442	3	35.82		F37:737	1	1	25	Carbamidomethylation	C10:Carbamidomethylation:1000.00
Sample 1	10	19	Uncharacterized protein OS=Gallus gallus GN=SERPINF1 PE=3 SV=1	tr|E1C7H6|E1C7H6_CHICK	R.LTFPIEYHVDRPFLLVL.R	Y	14.56	2071.15	17	1	691.391	3	36.04		F37:742	1	385	401
Sample 1	7	4	Collagen alpha-1(I) chain OS=Gallus gallus GN=COL1A1 PE=1 SV=3	P02457|CO1A1_CHICK	M.SDGFQFEYGGEGSNPADVAIQLTFLR.L	Y	17.09	2817.32	26	0.6	940.116	3	36.28		F37:748	1	1320	1345
Sample 1	4	8	SPARC OS=Gallus gallus GN=SPARC PE=4 SV=1	tr|F1P291|F1P291_CHICK	K.FIPC(sub A)CLDTELTEFPLR.M	Y	27.38	1895.92	16	8.4	948.973	2	36.32		F37:749	1	146	161	Mutation
Sample 1	17	259	Uncharacterized protein (Fragment) OS=Gallus gallus GN=COL5A1 PE=4 SV=2	tr|F1NI79|F1NI79_CHICK	K.TVLEINTPKVEQVPIVDIMFNDFGEASQK.F	Y	21.58	3260.66	29	0.9	1087.9	3	36.43		F37:751	1	1758	1786
Sample 1	17	260	Alpha 1 (V) collagen OS=Gallus gallus PE=2 SV=1	tr|Q9IAU4|Q9IAU4_CHICK	K.TVLEINTPKVEQVPIVDIMFNDFGEASQK.F	Y	21.58	3260.66	29	0.9	1087.9	3	36.43		F37:751	1	1795	1823
Sample 1	19	35	Lumican OS=Gallus gallus GN=LUM PE=1 SV=1	P51890|LUM_CHICK	K.GLNSLLYLDLSFNQLTK.L	Y	49.7	1938.05	17	1.7	970.032	2	36.84		F37:758	1	187	203
Sample 1	15	618	Uncharacterized protein OS=Gallus gallus GN=COL11A1 PE=4 SV=2	tr|F1P4K9|F1P4K9_CHICK	K.QLYPDGDFPEDFSIL.M	Y	20.56	1754.8	15	1.4	878.41	2	37.17		F37:763	2	91	105
Sample 1	11	1	Collagen alpha-2(I) chain OS=Gallus gallus GN=COL1A2 PE=4 SV=1	tr|F1P0H9|F1P0H9_CHICK	R.LPILDIAPLDIGGADQEFGLHIGPVC(+57.02)FK	Y	47.94	3004.57	28	1	1002.53	3	37.2		F37:764	2	1336	1363	Carbamidomethylation	C26:Carbamidomethylation:1000.00
Sample 1	11	5	Collagen alpha-2(I) chain (Fragments) OS=Gallus gallus GN=COL1A2 PE=1 SV=2	P02467|CO1A2_CHICK	R.LPILDIAPLDIGGADQEFGLHIGPVC(+57.02)FK	Y	47.94	3004.57	28	1	1002.53	3	37.2		F37:764	2	1335	1362	Carbamidomethylation	C26:Carbamidomethylation:1000.00
Sample 1	18	34	Tetranectin OS=Gallus gallus GN=CLEC3B PE=2 SV=1	tr|Q9DDD4|Q9DDD4_CHICK	K.SIGNEAEIWLGL.N	Y	23.58	1300.67	12	0.7	651.341	2	37.78		F37:774	1	123	134
Sample 1	5	7	Uncharacterized protein OS=Gallus gallus GN=AHSG PE=4 SV=1	tr|E1BZE1|E1BZE1_CHICK	R.VLFQGPNNEILFL.E	Y	21.27	1502.81	13	0.6	752.414	2	38.3		F37:781	4	65	77
Sample 1	2	2	Serum albumin OS=Gallus gallus GN=ALB PE=4 SV=2	tr|F2Z4L6|F2Z4L6_CHICK	K.YVPPPFNPDMFSF.D	N	34.6	1556.7	13	1.3	779.359	2	38.35		F37:783	2	475	487
Sample 1	3	3	Serum albumin OS=Gallus gallus GN=ALB PE=1 SV=2	P19121|ALBU_CHICK	K.YVPPPFNPDMFSF.D	N	34.6	1556.7	13	1.3	779.359	2	38.35		F37:783	2	525	537
Sample 1	17	259	Uncharacterized protein (Fragment) OS=Gallus gallus GN=COL5A1 PE=4 SV=2	tr|F1NI79|F1NI79_CHICK	K.QLYPASPFPEDFSIL.T	Y	23.75	1722.85	15	1.8	862.434	2	38.48		F37:787	3	54	68
Sample 1	17	260	Alpha 1 (V) collagen OS=Gallus gallus PE=2 SV=1	tr|Q9IAU4|Q9IAU4_CHICK	K.QLYPASPFPEDFSIL.T	Y	23.75	1722.85	15	1.8	862.434	2	38.48		F37:787	3	86	100
Sample 1	21	43	Alpha-1 type XI collagen (Fragment) OS=Gallus gallus PE=2 SV=1	tr|Q90796|Q90796_CHICK	K.FGFEVGPVC(+57.02)FLG	Y	44.54	1327.63	12	0.8	664.821	2	39.03		F37:800	2	877	888	Carbamidomethylation	C9:Carbamidomethylation:1000.00
Sample 1	17	259	Uncharacterized protein (Fragment) OS=Gallus gallus GN=COL5A1 PE=4 SV=2	tr|F1NI79|F1NI79_CHICK	R.ILDEEVFEGDIQQLLIVADPR.A	Y	38.88	2411.26	21	1.5	804.761	3	39.29		F37:803	1	176	196
Sample 1	17	260	Alpha 1 (V) collagen OS=Gallus gallus PE=2 SV=1	tr|Q9IAU4|Q9IAU4_CHICK	R.ILDEEVFEGDIQQLLIVADPR.A	Y	38.88	2411.26	21	1.5	804.761	3	39.29		F37:803	1	208	228
Sample 1	7	4	Collagen alpha-1(I) chain OS=Gallus gallus GN=COL1A1 PE=1 SV=3	P02457|CO1A1_CHICK	M.DVGAPDQEFGIDIGPVC(+57.02)FL	Y	22.35	2047.96	19	1.2	1024.99	2	40.7		F37:820	1	1435	1453	Carbamidomethylation	C17:Carbamidomethylation:1000.00
Sample 1	20	1202	Thrombospondin-2 OS=Gallus gallus GN=THBS2 PE=2 SV=1	P35440|TSP2_CHICK	R.GLLQNIHLIFDTSIEDVLR.K	Y	51.24	2195.2	19	0.3	732.739	3	41.11		F37:826	2	210	228
Sample 1	20	1203	Thrombospondin-2 OS=Gallus gallus GN=THBS2 PE=4 SV=2	tr|E1C3P2|E1C3P2_CHICK	R.GLLQNIHLIFDTSIEDVLR.K	Y	51.24	2195.2	19	0.3	732.739	3	41.11		F37:826	2	245	263
Sample 1	15	618	Uncharacterized protein OS=Gallus gallus GN=COL11A1 PE=4 SV=2	tr|F1P4K9|F1P4K9_CHICK	R.ILDEEVFEGEIQQLLIIADPR.A	Y	28.96	2439.29	21	1.8	814.105	3	42		F37:837	1	213	233
Sample 1	21	43	Alpha-1 type XI collagen (Fragment) OS=Gallus gallus PE=2 SV=1	tr|Q90796|Q90796_CHICK	K.IDQVPIVDVMINDFGDQSQKFGFEVGPVC(+57.02)FLG	Y	19.25	3569.72	32	2.6	1190.92	3	42.83		F37:847	1	857	888	Carbamidomethylation	C29:Carbamidomethylation:1000.00
Sample 1	7	4	Collagen alpha-1(I) chain OS=Gallus gallus GN=COL1A1 PE=1 SV=3	P02457|CO1A1_CHICK	R.LPIIDLAPMD(+15.99)VGAPDQEFGIDIGPVC(+57.02)FL	Y	16.92	3027.5	28	-1.9	1010.17	3	43.07		F37:849	1	1426	1453	Oxidation or Hydroxylation; Carbamidomethylation	D10:Oxidation or Hydroxylation:0.00;C26:Carbamidomethylation:1000.00
Sample 1	5	7	Uncharacterized protein OS=Gallus gallus GN=AHSG PE=4 SV=1	tr|E1BZE1|E1BZE1_CHICK	R.VLFQGPNNEILFLELDLLETT.C	Y	15.15	2417.27	21	2	1209.65	2	43.39		F37:854	1	65	85
Sample 1	2	2	Serum albumin OS=Gallus gallus GN=ALB PE=4 SV=2	tr|F2Z4L6|F2Z4L6_CHICK	K.LC(+57.02)SAPAEEREVGQM(+15.99)K.L	N	21.98	1719.79	15	0.5	574.271	3	12.42		F37:90	1	491	505	Carbamidomethylation; Oxidation (M)	C2:Carbamidomethylation:1000.00;M14:Oxidation (M):1000.00
Sample 1	3	3	Serum albumin OS=Gallus gallus GN=ALB PE=1 SV=2	P19121|ALBU_CHICK	K.LC(+57.02)SAPAEEREVGQM(+15.99)K.L	N	21.98	1719.79	15	0.5	574.271	3	12.42		F37:90	1	541	555	Carbamidomethylation; Oxidation (M)	C2:Carbamidomethylation:1000.00;M14:Oxidation (M):1000.00
Sample 1	22	38	Gremlin-1 OS=Gallus gallus GN=GREM1 PE=2 SV=1	O73755|GREM1_CHICK	R.NRGSQGAIPPPDKDQPNDSEQMQTQ.Q	Y	25.3	2737.24	25	1.1	913.42	3	13.08		F37:98	2	28	52
Sample 1	7	4	Collagen alpha-1(I) chain OS=Gallus gallus GN=COL1A1 PE=1 SV=3	P02457|CO1A1_CHICK	R.D(+15.99)GAAGPKGDRGETGPAGPPGAP(+15.99)GAPGAP(+15.99)GPVGPAGK.N	Y	18.33	3092.49	36	0.7	774.131	4	13.17		F37:99	1	1016	1051	Oxidation or Hydroxylation	D1:Oxidation or Hydroxylation:0.00;P22:Oxidation or Hydroxylation:0.00;P28:Oxidation or Hydroxylation:34.76
Sample 2	2	2	Serum albumin OS=Gallus gallus GN=ALB PE=4 SV=2	tr|F2Z4L6|F2Z4L6_CHICK	Q.EQLNQHIKETQDVVK.T	N	31.38	1807.94	15	0.1	603.655	3	13.83		F38:107	2	353	367
Sample 2	3	3	Serum albumin OS=Gallus gallus GN=ALB PE=1 SV=2	P19121|ALBU_CHICK	Q.EQLNQHIKETQDVVK.T	N	31.38	1807.94	15	0.1	603.655	3	13.83		F38:107	2	403	417
Sample 2	2	2	Serum albumin OS=Gallus gallus GN=ALB PE=4 SV=2	tr|F2Z4L6|F2Z4L6_CHICK	R.KQETTPINDNVSQC(+57.02)C(+57.02)SSSYANR.R	Y	50.69	2558.11	22	0.3	853.712	3	14.35		F38:114	2	441	462	Carbamidomethylation	C14:Carbamidomethylation:1000.00;C15:Carbamidomethylation:1000.00
Sample 2	1	6	Apolipoprotein A-I OS=Gallus gallus GN=APOA1 PE=1 SV=2	P08250|APOA1_CHICK	K.LREDM(+15.99)APYYKEVR.E	Y	39	1684.82	13	0.8	562.616	3	14.38		F38:115	5	83	95	Oxidation (M)	M5:Oxidation (M):1000.00
Sample 2	5	7	Uncharacterized protein OS=Gallus gallus GN=AHSG PE=4 SV=1	tr|E1BZE1|E1BZE1_CHICK	R.TFAEHAVEGDCD(+57.02)VK.L	Y	25.81	1576.68	14	1.2	789.35	2	14.53		F38:119	1	101	114	Carbamidomethylation (DHKE X@N-term)	D12:Carbamidomethylation (DHKE X@N-term):0.00
Sample 2	2	2	Serum albumin OS=Gallus gallus GN=ALB PE=4 SV=2	tr|F2Z4L6|F2Z4L6_CHICK	K.LC(+57.02)SAPAEEREVGQMK.L	N	23.87	1703.8	15	0.7	568.94	3	14.89		F38:124	1	491	505	Carbamidomethylation	C2:Carbamidomethylation:1000.00
Sample 2	3	3	Serum albumin OS=Gallus gallus GN=ALB PE=1 SV=2	P19121|ALBU_CHICK	K.LC(+57.02)SAPAEEREVGQMK.L	N	23.87	1703.8	15	0.7	568.94	3	14.89		F38:124	1	541	555	Carbamidomethylation	C2:Carbamidomethylation:1000.00
Sample 2	10	19	Uncharacterized protein OS=Gallus gallus GN=SERPINF1 PE=3 SV=1	tr|E1C7H6|E1C7H6_CHICK	L.SLGAGERTEDVISR.A	Y	15.88	1488.75	14	0.5	497.259	3	14.93		F38:125	1	91	104
Sample 2	4	8	SPARC OS=Gallus gallus GN=SPARC PE=4 SV=1	tr|F1P291|F1P291_CHICK	L.RAPLIPMEHC(+57.02)TTR.F	Y	38.18	1580.79	13	0.6	527.938	3	14.96		F38:126	1	251	263	Carbamidomethylation	C10:Carbamidomethylation:1000.00
Sample 2	4	8	SPARC OS=Gallus gallus GN=SPARC PE=4 SV=1	tr|F1P291|F1P291_CHICK	L.YERDEDNNLLTEK.Q	Y	38.06	1637.75	13	0.7	819.885	2	15.31		F38:135	1	174	186
Sample 2	4	8	SPARC OS=Gallus gallus GN=SPARC PE=4 SV=1	tr|F1P291|F1P291_CHICK	K.HGKVC(+57.02)EVDDNNSPMC(+57.02)VC(+57.02).Q	Y	17.25	2019.79	17	0.4	1010.9	2	15.41		F38:138	1	74	90	Carbamidomethylation	C5:Carbamidomethylation:1000.00;C15:Carbamidomethylation:1000.00;C17:Carbamidomethylation:1000.00
Sample 2	5	7	Uncharacterized protein OS=Gallus gallus GN=AHSG PE=4 SV=1	tr|E1BZE1|E1BZE1_CHICK	R.TFAEHAVEGDC(+57.02)DVKLQK.V	Y	55.15	1945.92	17	0.5	973.968	2	15.62		F38:143	3	101	117	Carbamidomethylation	C11:Carbamidomethylation:1000.00
Sample 2	1	6	Apolipoprotein A-I OS=Gallus gallus GN=APOA1 PE=1 SV=2	P08250|APOA1_CHICK	R.AELT(-2.02)KDLEEVKEK.I	Y	22.13	1528.8	13	1.9	510.608	3	15.95		F38:151	1	107	119	2-amino-3-oxo-butanoic_acid	T4:2-amino-3-oxo-butanoic_acid:53.33
Sample 2	11	1	Collagen alpha-2(I) chain OS=Gallus gallus GN=COL1A2 PE=4 SV=1	tr|F1P0H9|F1P0H9_CHICK	R.GLP(+15.99)GAIGAP(+15.99)GPAGGAGDRGEGGPAGPAGPAGAR.G	Y	41.28	2724.33	33	0.6	909.119	3	16.24		F38:161	2	675	707	Oxidation or Hydroxylation	P3:Oxidation or Hydroxylation:150.89;P9:Oxidation or Hydroxylation:39.76
Sample 2	11	5	Collagen alpha-2(I) chain (Fragments) OS=Gallus gallus GN=COL1A2 PE=1 SV=2	P02467|CO1A2_CHICK	R.GLP(+15.99)GAIGAP(+15.99)GPAGGAGDRGEGGPAGPAGPAGAR.G	Y	41.28	2724.33	33	0.6	909.119	3	16.24		F38:161	2	674	706	Oxidation or Hydroxylation	P3:Oxidation or Hydroxylation:150.89;P9:Oxidation or Hydroxylation:39.76
Sample 2	7	4	Collagen alpha-1(I) chain OS=Gallus gallus GN=COL1A1 PE=1 SV=3	P02457|CO1A1_CHICK	R.GDPGPK.G	Y	15.54	569.281	6	7.2	570.292	1	16.27		F38:162	1	735	740
Sample 2	7	4	Collagen alpha-1(I) chain OS=Gallus gallus GN=COL1A1 PE=1 SV=3	P02457|CO1A1_CHICK	R.GFP(+15.99)GADGIAGPKGPP(+15.99)GER.G	Y	42.46	1710.83	18	1.6	856.425	2	16.36		F38:165	1	483	500	Oxidation or Hydroxylation	P3:Oxidation or Hydroxylation:14.02;P15:Oxidation or Hydroxylation:0.00
Sample 2	8	25	Matrix Gla protein OS=Gallus gallus GN=MGP PE=2 SV=1	O42413|MGP_CHICK	G.F(+57.02)IRDDTGLR.A	Y	26.37	1148.59	9	0.6	575.304	2	16.62		F38:170	2	44	52	Carbamidomethylation (DHKE X@N-term)	F1:Carbamidomethylation (DHKE X@N-term):32.97
Sample 2	1	6	Apolipoprotein A-I OS=Gallus gallus GN=APOA1 PE=1 SV=2	P08250|APOA1_CHICK	L.APYSDELRQK.L	Y	36.04	1205.6	10	0.6	603.81	2	16.7		F38:173	1	187	196
Sample 2	1	6	Apolipoprotein A-I OS=Gallus gallus GN=APOA1 PE=1 SV=2	P08250|APOA1_CHICK	T.PYAENLK.N	Y	14.49	833.428	7	0.9	834.436	1	16.92		F38:180	1	243	249
Sample 2	1	6	Apolipoprotein A-I OS=Gallus gallus GN=APOA1 PE=1 SV=2	P08250|APOA1_CHICK	K.LREDMAPYYKEVR.E	Y	34.41	1668.83	13	1.6	557.285	3	17		F38:182	1	83	95
Sample 2	1	6	Apolipoprotein A-I OS=Gallus gallus GN=APOA1 PE=1 SV=2	P08250|APOA1_CHICK	R.IRD(+15.99)MVDVY.L	Y	18.73	1025.49	8	0.6	513.75	2	17.15		F38:187	1	34	41	Oxidation or Hydroxylation	D3:Oxidation or Hydroxylation:14.02
Sample 2	16	13409	Prothrombin OS=Gallus gallus PE=2 SV=1	tr|Q91001|Q91001_CHICK	K.ALLQDKTINPEVK.L	Y	45.79	1467.83	13	0.4	734.922	2	17.38		F38:195	3	238	250
Sample 2	16	13410	Prothrombin OS=Gallus gallus GN=F2 PE=3 SV=1	tr|F1NXV6|F1NXV6_CHICK	K.ALLQDKTINPEVK.L	Y	45.79	1467.83	13	0.4	734.922	2	17.38		F38:195	3	238	250
Sample 2	7	4	Collagen alpha-1(I) chain OS=Gallus gallus GN=COL1A1 PE=1 SV=3	P02457|CO1A1_CHICK	K.GATGAP(+15.99)GIAGAP(+15.99)GFPGAR(+15.99).G	Y	47.57	1571.77	18	0.8	786.893	2	17.52		F38:199	1	387	404	Oxidation or Hydroxylation	P6:Oxidation or Hydroxylation:112.87;P12:Oxidation or Hydroxylation:10.42;R18:Oxidation or Hydroxylation:0.00
Sample 2	12	10	Decorin OS=Gallus gallus GN=DCN PE=1 SV=1	P28675|PGS2_CHICK	R.VVQC(+57.02)SDLGLER.V	Y	21.22	1274.63	11	0.2	638.322	2	17.88		F38:211	2	62	72	Carbamidomethylation	C4:Carbamidomethylation:1000.00
Sample 2	12	11	Decorin OS=Gallus gallus GN=DCN PE=4 SV=2	tr|E1BRE9|E1BRE9_CHICK	R.VVQC(+57.02)SDLGLER.V	Y	21.22	1274.63	11	0.2	638.322	2	17.88		F38:211	2	62	72	Carbamidomethylation	C4:Carbamidomethylation:1000.00
Sample 2	5	7	Uncharacterized protein OS=Gallus gallus GN=AHSG PE=4 SV=1	tr|E1BZE1|E1BZE1_CHICK	R.T(-2.02)FAEHAVEGDC(+57.02)DVKLQ.K	Y	17.13	1815.81	16	1.6	606.278	3	17.95		F38:213	1	101	116	2-amino-3-oxo-butanoic_acid; Carbamidomethylation	T1:2-amino-3-oxo-butanoic_acid:1000.00;C11:Carbamidomethylation:1000.00
Sample 2	5	7	Uncharacterized protein OS=Gallus gallus GN=AHSG PE=4 SV=1	tr|E1BZE1|E1BZE1_CHICK	K.QYHPVQ(sub R)MV.S	Y	19.97	1000.48	8	0.3	501.248	2	18.05		F38:217	2	188	195	Mutation
Sample 2	8	25	Matrix Gla protein OS=Gallus gallus GN=MGP PE=2 SV=1	O42413|MGP_CHICK	R.Q(-17.03)RAN(+.98)GFIRDDTGLR.A	Y	39.72	1601.79	14	0.6	534.938	3	18.6		F38:234	1	39	52	Pyro-glu from Q; Deamidation (NQ)	Q1:Pyro-glu from Q:1000.00;N4:Deamidation (NQ):1000.00
Sample 2	9	69	Bone sialoprotein 2 OS=Gallus gallus GN=IBSP PE=1 SV=1	P79780|SIAL_CHICK	G.E(+57.02)GLTLGDVGPGGDAASAHQDC(+57.02)K.G	Y	32.35	2210.99	22	1.7	1106.5	2	18.74		F38:238	1	88	109	Carbamidomethylation (DHKE X@N-term); Carbamidomethylation	E1:Carbamidomethylation (DHKE X@N-term):12.65;C21:Carbamidomethylation:1000.00
Sample 2	9	70	Bone sialoprotein 2 OS=Gallus gallus GN=IBSP PE=4 SV=1	tr|F6TAB6|F6TAB6_CHICK	G.E(+57.02)GLTLGDVGPGGDAASAHQDC(+57.02)K.G	Y	32.35	2210.99	22	1.7	1106.5	2	18.74		F38:238	1	88	109	Carbamidomethylation (DHKE X@N-term); Carbamidomethylation	E1:Carbamidomethylation (DHKE X@N-term):12.65;C21:Carbamidomethylation:1000.00
Sample 2	6	20	Vitronectin OS=Gallus gallus PE=2 SV=1	tr|O12945|O12945_CHICK	Y.FFVGDKYYR.V	Y	31.21	1193.59	9	0.5	597.801	2	18.95		F38:243	1	411	419
Sample 2	6	21	Uncharacterized protein OS=Gallus gallus GN=VTN PE=4 SV=2	tr|E1C7A7|E1C7A7_CHICK	Y.FFVGDKYYR.V	Y	31.21	1193.59	9	0.5	597.801	2	18.95		F38:243	1	411	419
Sample 2	1	6	Apolipoprotein A-I OS=Gallus gallus GN=APOA1 PE=1 SV=2	P08250|APOA1_CHICK	K.NLAPYSDELR.Q	Y	36.18	1176.58	10	0.6	589.296	2	19.43	43100000	F38:259	4	185	194
Sample 2	5	7	Uncharacterized protein OS=Gallus gallus GN=AHSG PE=4 SV=1	tr|E1BZE1|E1BZE1_CHICK	R.FALNRIEQVR.V	Y	32.42	1244.7	10	0.6	415.907	3	19.46	31400000	F38:260	5	55	64
Sample 2	1	6	Apolipoprotein A-I OS=Gallus gallus GN=APOA1 PE=1 SV=2	P08250|APOA1_CHICK	K.ASGKDAIAQFESS.A	Y	46.16	1309.62	13	0.4	655.815	2	19.48		F38:261	4	47	59
Sample 2	5	7	Uncharacterized protein OS=Gallus gallus GN=AHSG PE=4 SV=1	tr|E1BZE1|E1BZE1_CHICK	A.LNRIEQVR.V	Y	29.32	1026.59	8	0.6	514.304	2	19.54	7220000	F38:263	2	57	64
Sample 2	1	6	Apolipoprotein A-I OS=Gallus gallus GN=APOA1 PE=1 SV=2	P08250|APOA1_CHICK	K.W(+13.98)TEELEQYR.Q	Y	34.72	1266.55	9	1	634.284	2	20.38		F38:289	2	131	139	Tryptophan oxidation to oxolactone	W1:Tryptophan oxidation to oxolactone:1000.00
Sample 2	16	13409	Prothrombin OS=Gallus gallus PE=2 SV=1	tr|Q91001|Q91001_CHICK	R.C(+57.02)LPWASEK.A	Y	17.39	989.464	8	0.7	495.74	2	20.46		F38:292	1	228	235	Carbamidomethylation	C1:Carbamidomethylation:1000.00
Sample 2	16	13410	Prothrombin OS=Gallus gallus GN=F2 PE=3 SV=1	tr|F1NXV6|F1NXV6_CHICK	R.C(+57.02)LPWASEK.A	Y	17.39	989.464	8	0.7	495.74	2	20.46		F38:292	1	228	235	Carbamidomethylation	C1:Carbamidomethylation:1000.00
Sample 2	14	26	Secreted phosphoprotein 24 OS=Gallus gallus GN=SPP2 PE=4 SV=1	tr|F1P4U3|F1P4U3_CHICK	K.VGPFVPTAVC(+57.02)K(-.98).S	Y	19.84	1172.64	11	-6.1	587.322	2	20.56		F38:295	2	107	117	Carbamidomethylation; Amidation	C10:Carbamidomethylation:1000.00;K11:Amidation:1000.00
Sample 2	14	27	Secreted phosphoprotein 24 OS=Gallus gallus GN=SPP2 PE=2 SV=1	Q710A0|SPP24_CHICK	K.VGPFVPTAVC(+57.02)K(-.98).S	Y	19.84	1172.64	11	-6.1	587.322	2	20.56		F38:295	2	107	117	Carbamidomethylation; Amidation	C10:Carbamidomethylation:1000.00;K11:Amidation:1000.00
Sample 2	2	2	Serum albumin OS=Gallus gallus GN=ALB PE=4 SV=2	tr|F2Z4L6|F2Z4L6_CHICK	K.TNC(+57.02)DLLHDHGEADFLK.S	N	37.6	1883.85	16	0.4	628.957	3	20.58		F38:296	3	368	383	Carbamidomethylation	C3:Carbamidomethylation:1000.00
Sample 2	3	3	Serum albumin OS=Gallus gallus GN=ALB PE=1 SV=2	P19121|ALBU_CHICK	K.TNC(+57.02)DLLHDHGEADFLK.S	N	37.6	1883.85	16	0.4	628.957	3	20.58		F38:296	3	418	433	Carbamidomethylation	C3:Carbamidomethylation:1000.00
Sample 2	5	7	Uncharacterized protein OS=Gallus gallus GN=AHSG PE=4 SV=1	tr|E1BZE1|E1BZE1_CHICK	A.Q(-17.03)HDKVPHPVGFVPPPPLC(+57.02)PGK.I	Y	30.35	2285.18	21	0.9	762.734	3	20.85		F38:305	4	318	338	Pyro-glu from Q; Carbamidomethylation	Q1:Pyro-glu from Q:1000.00;C18:Carbamidomethylation:1000.00
Sample 2	1	6	Apolipoprotein A-I OS=Gallus gallus GN=APOA1 PE=1 SV=2	P08250|APOA1_CHICK	K.MTPLVQEFRER.L	Y	24.95	1404.72	11	0.5	469.247	3	20.87		F38:306	1	230	240
Sample 2	13	36	Uncharacterized protein OS=Gallus gallus GN=OMD PE=4 SV=1	tr|R4GF52|R4GF52_CHICK	R.VDQNKLTTPISTY.A	Y	23.08	1478.76	13	0.8	740.389	2	20.99		F38:310	1	337	349
Sample 2	2	2	Serum albumin OS=Gallus gallus GN=ALB PE=4 SV=2	tr|F2Z4L6|F2Z4L6_CHICK	R.M(+31.99)MSNLC(+57.02)SQQDVFSGK.I	N	24.09	1762.73	15	1.3	882.375	2	21.42		F38:324	1	238	252	Sulphone; Carbamidomethylation	M1:Sulphone:0.00;C6:Carbamidomethylation:1000.00
Sample 2	3	3	Serum albumin OS=Gallus gallus GN=ALB PE=1 SV=2	P19121|ALBU_CHICK	R.M(+31.99)MSNLC(+57.02)SQQDVFSGK.I	N	24.09	1762.73	15	1.3	882.375	2	21.42		F38:324	1	288	302	Sulphone; Carbamidomethylation	M1:Sulphone:0.00;C6:Carbamidomethylation:1000.00
Sample 2	7	4	Collagen alpha-1(I) chain OS=Gallus gallus GN=COL1A1 PE=1 SV=3	P02457|CO1A1_CHICK	K.D(+43.99)GLNGL.P	Y	13.98	631.281	6	6.9	632.293	1	21.71		F38:332	1	1142	1147	Carboxylation (DKW)	D1:Carboxylation (DKW):1000.00
Sample 2	1	6	Apolipoprotein A-I OS=Gallus gallus GN=APOA1 PE=1 SV=2	P08250|APOA1_CHICK	R.IR(+15.99)DMVDVYLETVK.A	Y	40.86	1595.82	13	0.7	532.949	3	21.74		F38:333	1	34	46	Oxidation or Hydroxylation	R2:Oxidation or Hydroxylation:12.28
Sample 2	5	7	Uncharacterized protein OS=Gallus gallus GN=AHSG PE=4 SV=1	tr|E1BZE1|E1BZE1_CHICK	K.C(+57.02)HSHADS(+79.97)AEDIREVC(+57.02)PNC(+57.02)PLLA.N	Y	34.08	2630.07	22	0.8	877.698	3	21.82		F38:336	1	129	150	Carbamidomethylation; Phosphorylation (STY)	C1:Carbamidomethylation:1000.00;S7:Phosphorylation (STY):4.08;C15:Carbamidomethylation:1000.00;C18:Carbamidomethylation:1000.00
Sample 2	4	8	SPARC OS=Gallus gallus GN=SPARC PE=4 SV=1	tr|F1P291|F1P291_CHICK	K.VC(+57.02)EVDDNNSPMC(+57.02)VC(+57.02)QDPSSC(+57.02)PATSGV(sub I)FEK.V	Y	42.15	3288.31	29	-0.3	1097.11	3	22.04		F38:343	1	77	105	Carbamidomethylation; Mutation	C2:Carbamidomethylation:1000.00;C12:Carbamidomethylation:1000.00;C14:Carbamidomethylation:1000.00;C20:Carbamidomethylation:1000.00
Sample 2	21	43	Alpha-1 type XI collagen (Fragment) OS=Gallus gallus PE=2 SV=1	tr|Q90796|Q90796_CHICK	K.G(+42.01)NPGPV.G	N	16.72	581.281	6	7.3	582.292	1	22.2		F38:348	1	388	393	Acetylation (N-term)	G1:Acetylation (N-term):1000.00
Sample 2	15	618	Uncharacterized protein OS=Gallus gallus GN=COL11A1 PE=4 SV=2	tr|F1P4K9|F1P4K9_CHICK	K.G(+42.01)NPGPV.G	N	16.72	581.281	6	7.3	582.292	1	22.2		F38:348	1	1307	1312	Acetylation (N-term)	G1:Acetylation (N-term):1000.00
Sample 2	27	15	Cystatin OS=Gallus gallus PE=1 SV=2	P01038|CYT_CHICK	R.LLGAPVPVDENDEGLQR.A	Y	48.22	1820.93	17	0.9	911.471	2	22.25		F38:350	1	30	46
Sample 2	27	16	Uncharacterized protein OS=Gallus gallus GN=CST3 PE=4 SV=1	tr|R4GLT1|R4GLT1_CHICK	R.LLGAPVPVDENDEGLQR.A	Y	48.22	1820.93	17	0.9	911.471	2	22.25		F38:350	1	42	58
Sample 2	16	13409	Prothrombin OS=Gallus gallus PE=2 SV=1	tr|Q91001|Q91001_CHICK	K.QITDQSEKELMDSY.M	Y	37.06	1685.75	14	1.1	843.881	2	22.65		F38:361	1	333	346
Sample 2	16	13410	Prothrombin OS=Gallus gallus GN=F2 PE=3 SV=1	tr|F1NXV6|F1NXV6_CHICK	K.QITDQSEKELMDSY.M	Y	37.06	1685.75	14	1.1	843.881	2	22.65		F38:361	1	333	346
Sample 2	13	36	Uncharacterized protein OS=Gallus gallus GN=OMD PE=4 SV=1	tr|R4GF52|R4GF52_CHICK	K.QVFYIPR.S	Y	29.25	921.507	7	0.4	461.761	2	22.76		F38:364	1	294	300
Sample 2	18	34	Tetranectin OS=Gallus gallus GN=CLEC3B PE=2 SV=1	tr|Q9DDD4|Q9DDD4_CHICK	R.YKNWETEITTQPDGGKLENC(+57.02)AALSGVAVGK.W	Y	34.16	3235.58	30	0.1	809.903	4	23.42		F38:386	2	153	182	Carbamidomethylation	C20:Carbamidomethylation:1000.00
Sample 2	1	6	Apolipoprotein A-I OS=Gallus gallus GN=APOA1 PE=1 SV=2	P08250|APOA1_CHICK	K.LADNLDTLSAA.A	Y	27.3	1102.55	11	1.5	552.283	2	23.71		F38:394	1	69	79
Sample 2	15	618	Uncharacterized protein OS=Gallus gallus GN=COL11A1 PE=4 SV=2	tr|F1P4K9|F1P4K9_CHICK	Q.QLLIIADPR.A	Y	24.46	1037.62	9	0.8	519.819	2	23.87		F38:399	1	225	233
Sample 2	4	8	SPARC OS=Gallus gallus GN=SPARC PE=4 SV=1	tr|F1P291|F1P291_CHICK	K.NVLITLYERDEDNNLLTEKQK.L	Y	51.55	2547.32	21	0.7	850.114	3	24.69		F38:424	1	168	188
Sample 2	1	6	Apolipoprotein A-I OS=Gallus gallus GN=APOA1 PE=1 SV=2	P08250|APOA1_CHICK	T.PVAQELKELTK.Q	Y	38.4	1254.72	11	0.8	628.367	2	24.77		F38:426	3	144	154
Sample 2	2	2	Serum albumin OS=Gallus gallus GN=ALB PE=4 SV=2	tr|F2Z4L6|F2Z4L6_CHICK	K.MPQVPTDLLLETGKK.M	N	28.83	1668.91	15	0.5	557.312	3	25		F38:434	1	393	407
Sample 2	3	3	Serum albumin OS=Gallus gallus GN=ALB PE=1 SV=2	P19121|ALBU_CHICK	K.MPQVPTDLLLETGKK.M	N	28.83	1668.91	15	0.5	557.312	3	25		F38:434	1	443	457
Sample 2	13	36	Uncharacterized protein OS=Gallus gallus GN=OMD PE=4 SV=1	tr|R4GF52|R4GF52_CHICK	Q.AEVPHFPFPVEC(+57.02)AR.E	Y	33.5	1654.79	14	1.2	552.605	3	25.28		F38:443	1	50	63	Carbamidomethylation	C12:Carbamidomethylation:1000.00
Sample 2	2	2	Serum albumin OS=Gallus gallus GN=ALB PE=4 SV=2	tr|F2Z4L6|F2Z4L6_CHICK	R.IAKGY(+15.99)ESLLEK(+226.08)C(+57.02)C(+57.02)K.T	N	15.11	1939.92	14	4.4	970.972	2	25.87		F38:460	1	327	340	Oxidation or Hydroxylation; Biotinylation; Carbamidomethylation	Y5:Oxidation or Hydroxylation:0.00;K11:Biotinylation:4.05;C12:Carbamidomethylation:1000.00;C13:Carbamidomethylation:1000.00
Sample 2	3	3	Serum albumin OS=Gallus gallus GN=ALB PE=1 SV=2	P19121|ALBU_CHICK	R.IAKGY(+15.99)ESLLEK(+226.08)C(+57.02)C(+57.02)K.T	N	15.11	1939.92	14	4.4	970.972	2	25.87		F38:460	1	377	390	Oxidation or Hydroxylation; Biotinylation; Carbamidomethylation	Y5:Oxidation or Hydroxylation:0.00;K11:Biotinylation:4.05;C12:Carbamidomethylation:1000.00;C13:Carbamidomethylation:1000.00
Sample 2	17	259	Uncharacterized protein (Fragment) OS=Gallus gallus GN=COL5A1 PE=4 SV=2	tr|F1NI79|F1NI79_CHICK	R.SPVFLYEDHTGKPGPEDYPLFR.G	Y	31.33	2563.24	22	0.7	641.817	4	25.92		F38:461	1	100	121
Sample 2	17	260	Alpha 1 (V) collagen OS=Gallus gallus PE=2 SV=1	tr|Q9IAU4|Q9IAU4_CHICK	R.SPVFLYEDHTGKPGPEDYPLFR.G	Y	31.33	2563.24	22	0.7	641.817	4	25.92		F38:461	1	132	153
Sample 2	12	10	Decorin OS=Gallus gallus GN=DCN PE=1 SV=1	P28675|PGS2_CHICK	K.IDAEGLSGLTNLAK.L	Y	47.07	1400.75	14	1.6	701.384	2	26.12		F38:466	2	234	247
Sample 2	12	11	Decorin OS=Gallus gallus GN=DCN PE=4 SV=2	tr|E1BRE9|E1BRE9_CHICK	K.IDAEGLSGLTNLAK.L	Y	47.07	1400.75	14	1.6	701.384	2	26.12		F38:466	2	234	247
Sample 2	1	6	Apolipoprotein A-I OS=Gallus gallus GN=APOA1 PE=1 SV=2	P08250|APOA1_CHICK	R.LTPVAQELKEL.T	Y	37.84	1239.71	11	0.5	620.861	2	26.46		F38:477	1	142	152
Sample 2	2	2	Serum albumin OS=Gallus gallus GN=ALB PE=4 SV=2	tr|F2Z4L6|F2Z4L6_CHICK	K.ADPERNEC(+57.02)FLSF.K	N	29.73	1483.64	12	1	742.828	2	27.34		F38:505	3	71	82	Carbamidomethylation	C8:Carbamidomethylation:1000.00
Sample 2	3	3	Serum albumin OS=Gallus gallus GN=ALB PE=1 SV=2	P19121|ALBU_CHICK	K.ADPERNEC(+57.02)FLSF.K	N	29.73	1483.64	12	1	742.828	2	27.34		F38:505	3	121	132	Carbamidomethylation	C8:Carbamidomethylation:1000.00
Sample 2	1	6	Apolipoprotein A-I OS=Gallus gallus GN=APOA1 PE=1 SV=2	P08250|APOA1_CHICK	R.IRDMVDVYLETVKAS.G	Y	35.78	1737.9	15	1.2	869.957	2	27.6		F38:513	1	34	48
Sample 2	5	7	Uncharacterized protein OS=Gallus gallus GN=AHSG PE=4 SV=1	tr|E1BZE1|E1BZE1_CHICK	K.DNLAAC(+57.02)QLLPEDQSNFGFC(+57.02)TAK.M	Y	37.52	2498.12	22	2.2	833.716	3	27.7		F38:516	5	213	234	Carbamidomethylation	C6:Carbamidomethylation:1000.00;C19:Carbamidomethylation:1000.00
Sample 2	5	7	Uncharacterized protein OS=Gallus gallus GN=AHSG PE=4 SV=1	tr|E1BZE1|E1BZE1_CHICK	K.DNLAAC(+57.02)QLLPEDQSNFGFCTAK(+57.02).M	Y	30.14	2498.12	22	2.3	1250.07	2	27.73		F38:517	1	213	234	Carbamidomethylation; Carbamidomethylation (DHKE X@N-term)	C6:Carbamidomethylation:1000.00;K22:Carbamidomethylation (DHKE X@N-term):32.22
Sample 2	5	7	Uncharacterized protein OS=Gallus gallus GN=AHSG PE=4 SV=1	tr|E1BZE1|E1BZE1_CHICK	K.D(+57.02)NLAACQLLPEDQSNFGFC(+57.02)TAK.M	Y	32.25	2498.12	22	1.7	1250.07	2	27.82		F38:520	2	213	234	Carbamidomethylation (DHKE X@N-term); Carbamidomethylation	D1:Carbamidomethylation (DHKE X@N-term):32.22;C19:Carbamidomethylation:1000.00
Sample 2	5	7	Uncharacterized protein OS=Gallus gallus GN=AHSG PE=4 SV=1	tr|E1BZE1|E1BZE1_CHICK	K.MVTEPSQDLIAEC(+57.02)QLY.G	Y	20.55	1895.86	16	1.7	948.941	2	28.44		F38:538	1	235	250	Carbamidomethylation	C13:Carbamidomethylation:1000.00
Sample 2	1	6	Apolipoprotein A-I OS=Gallus gallus GN=APOA1 PE=1 SV=2	P08250|APOA1_CHICK	K.IRPFLDQF.S	Y	31.43	1034.55	8	0.9	518.285	2	28.72		F38:547	5	120	127
Sample 2	10	19	Uncharacterized protein OS=Gallus gallus GN=SERPINF1 PE=3 SV=1	tr|E1C7H6|E1C7H6_CHICK	G.Q(-17.03)NSPTTDGTVGEVEEEDPFYKTPINKL.A	Y	20.21	2990.4	27	1.8	997.81	3	28.84		F38:551	1	26	52	Pyro-glu from Q	Q1:Pyro-glu from Q:1000.00
Sample 2	1	6	Apolipoprotein A-I OS=Gallus gallus GN=APOA1 PE=1 SV=2	P08250|APOA1_CHICK	K.QLDLKLADNLDTLSAA.A	Y	27.94	1699.9	16	0.8	850.957	2	28.99		F38:555	1	64	79
Sample 2	1	6	Apolipoprotein A-I OS=Gallus gallus GN=APOA1 PE=1 SV=2	P08250|APOA1_CHICK	K.QLDLKLADNLDTL.S	Y	35.69	1470.79	13	0.4	736.404	2	29.38		F38:566	1	64	76
Sample 2	19	35	Lumican OS=Gallus gallus GN=LUM PE=1 SV=1	P51890|LUM_CHICK	T.SLVELDLSFNQLK.S	Y	35.59	1504.81	13	-8.8	753.408	2	30.77		F38:605	1	260	272
Sample 2	5	7	Uncharacterized protein OS=Gallus gallus GN=AHSG PE=4 SV=1	tr|E1BZE1|E1BZE1_CHICK	K.DNLAAC(+57.02)QLLPEDQSNFGFC(+57.02).T	Y	19.12	2197.94	19	1.3	1099.98	2	31.55		F38:624	1	213	231	Carbamidomethylation	C6:Carbamidomethylation:1000.00;C19:Carbamidomethylation:1000.00
Sample 2	6	20	Vitronectin OS=Gallus gallus PE=2 SV=1	tr|O12945|O12945_CHICK	R.FDDGALDPGYPRDISEGFEGIPNDIDAAFALPAHSYHGNER.V	Y	52.04	4445.03	41	-0.7	890.012	5	31.86		F38:631	2	228	268
Sample 2	6	21	Uncharacterized protein OS=Gallus gallus GN=VTN PE=4 SV=2	tr|E1C7A7|E1C7A7_CHICK	R.FDDGALDPGYPRDISEGFEGIPNDIDAAFALPAHSYHGNER.V	Y	52.04	4445.03	41	-0.7	890.012	5	31.86		F38:631	2	228	268
Sample 2	2	2	Serum albumin OS=Gallus gallus GN=ALB PE=4 SV=2	tr|F2Z4L6|F2Z4L6_CHICK	R.RHPFLYAPAILSF.A	N	36.3	1530.83	13	0	766.425	2	32.01		F38:634	1	123	135
Sample 2	3	3	Serum albumin OS=Gallus gallus GN=ALB PE=1 SV=2	P19121|ALBU_CHICK	R.RHPFLYAPAILSF.A	N	36.3	1530.83	13	0	766.425	2	32.01		F38:634	1	173	185
Sample 2	13	36	Uncharacterized protein OS=Gallus gallus GN=OMD PE=4 SV=1	tr|R4GF52|R4GF52_CHICK	R.NTFISLPNLIELNLGHNK.L	Y	33.32	2036.11	18	0.9	679.71	3	32.74		F38:647	2	274	291
Sample 2	4	8	SPARC OS=Gallus gallus GN=SPARC PE=4 SV=1	tr|F1P291|F1P291_CHICK	K.FIT(sub P)AC(+57.02)LDTELTEFPLR.M	Y	29.15	1924.96	16	6.8	963.494	2	32.77		F38:648	2	146	161	Carbamidomethylation; Mutation	C5:Carbamidomethylation:1000.00
Sample 2	1	6	Apolipoprotein A-I OS=Gallus gallus GN=APOA1 PE=1 SV=2	P08250|APOA1_CHICK	R.LISFLDELQKSVA	Y	25.62	1461.81	13	1.2	731.912	2	33.43		F38:664	1	252	264
Sample 2	2	2	Serum albumin OS=Gallus gallus GN=ALB PE=4 SV=2	tr|F2Z4L6|F2Z4L6_CHICK	K.C(+57.02)VANED(+6.01)APEC(+57.02)SKPLPSIILDEIC(+57.02)QVEK.L	N	33.94	3119.48	27	-1.6	1040.83	3	33.59		F38:669	1	30	56	Carbamidomethylation; Replacement of proton by lithium	C1:Carbamidomethylation:1000.00;D6:Replacement of proton by lithium:12.28;C10:Carbamidomethylation:1000.00;C23:Carbamidomethylation:1000.00
Sample 2	3	3	Serum albumin OS=Gallus gallus GN=ALB PE=1 SV=2	P19121|ALBU_CHICK	K.C(+57.02)VANED(+6.01)APEC(+57.02)SKPLPSIILDEIC(+57.02)QVEK.L	N	33.94	3119.48	27	-1.6	1040.83	3	33.59		F38:669	1	80	106	Carbamidomethylation; Replacement of proton by lithium	C1:Carbamidomethylation:1000.00;D6:Replacement of proton by lithium:12.28;C10:Carbamidomethylation:1000.00;C23:Carbamidomethylation:1000.00
Sample 2	17	259	Uncharacterized protein (Fragment) OS=Gallus gallus GN=COL5A1 PE=4 SV=2	tr|F1NI79|F1NI79_CHICK	R.ILDEEVFEGD(+14.02)IQQL.L	Y	18.9	1660.82	14	0.7	831.418	2	33.92		F38:678	1	176	189	Methyl ester	D10:Methyl ester:11.10
Sample 2	17	260	Alpha 1 (V) collagen OS=Gallus gallus PE=2 SV=1	tr|Q9IAU4|Q9IAU4_CHICK	R.ILDEEVFEGD(+14.02)IQQL.L	Y	18.9	1660.82	14	0.7	831.418	2	33.92		F38:678	1	208	221	Methyl ester	D10:Methyl ester:11.10
Sample 2	18	34	Tetranectin OS=Gallus gallus GN=CLEC3B PE=2 SV=1	tr|Q9DDD4|Q9DDD4_CHICK	K.SIGNEAEIWLGLNDMVAEGK.W	Y	32.04	2145.04	20	0.8	1073.53	2	34.52		F38:688	1	123	142
Sample 2	2	2	Serum albumin OS=Gallus gallus GN=ALB PE=4 SV=2	tr|F2Z4L6|F2Z4L6_CHICK	K.C(+57.02)VANEDAPEC(+57.02)SKPLPSIILDEIC(+57.02)QVEKLR.D	N	46.69	3382.66	29	0.6	846.672	4	35.13		F38:701	1	30	58	Carbamidomethylation	C1:Carbamidomethylation:1000.00;C10:Carbamidomethylation:1000.00;C23:Carbamidomethylation:1000.00
Sample 2	3	3	Serum albumin OS=Gallus gallus GN=ALB PE=1 SV=2	P19121|ALBU_CHICK	K.C(+57.02)VANEDAPEC(+57.02)SKPLPSIILDEIC(+57.02)QVEKLR.D	N	46.69	3382.66	29	0.6	846.672	4	35.13		F38:701	1	80	108	Carbamidomethylation	C1:Carbamidomethylation:1000.00;C10:Carbamidomethylation:1000.00;C23:Carbamidomethylation:1000.00
Sample 2	1	6	Apolipoprotein A-I OS=Gallus gallus GN=APOA1 PE=1 SV=2	P08250|APOA1_CHICK	H.DEPQTPLDRIRDM(+15.99)VDVYLETVK.A	Y	30.07	2647.32	22	1.6	883.447	3	35.42		F38:709	1	25	46	Oxidation (M)	M13:Oxidation (M):1000.00
Sample 2	1	6	Apolipoprotein A-I OS=Gallus gallus GN=APOA1 PE=1 SV=2	P08250|APOA1_CHICK	H.DEPQTP(+15.99)LDRIRDMVDVYLETVK.A	Y	21.8	2647.32	22	1	662.837	4	35.46		F38:710	1	25	46	Oxidation or Hydroxylation	P6:Oxidation or Hydroxylation:7.32
Sample 2	17	259	Uncharacterized protein (Fragment) OS=Gallus gallus GN=COL5A1 PE=4 SV=2	tr|F1NI79|F1NI79_CHICK	K.LLSYVDSDGNPIGVVQMTFLR.L	Y	24.89	2323.19	21	2.1	1162.6	2	35.65		F38:714	1	1672	1692
Sample 2	17	260	Alpha 1 (V) collagen OS=Gallus gallus PE=2 SV=1	tr|Q9IAU4|Q9IAU4_CHICK	K.LLSYVDSDGNPIGVVQMTFLR.L	Y	24.89	2323.19	21	2.1	1162.6	2	35.65		F38:714	1	1709	1729
Sample 2	23	617	Uncharacterized protein OS=Gallus gallus GN=KNG1 PE=4 SV=2	tr|E1BX43|E1BX43_CHICK	K.IVPVQPLIPF.T	Y	15.66	1121.68	10	1	561.85	2	36.33		F38:727	1	128	137
Sample 2	4	8	SPARC OS=Gallus gallus GN=SPARC PE=4 SV=1	tr|F1P291|F1P291_CHICK	R.FFEAC(+57.02)DLDNDKYIALEEWASC(+57.02)F.G	Y	25.09	2742.16	22	1.8	1372.09	2	36.89		F38:738	1	264	285	Carbamidomethylation	C5:Carbamidomethylation:1000.00;C21:Carbamidomethylation:1000.00
Sample 2	10	19	Uncharacterized protein OS=Gallus gallus GN=SERPINF1 PE=3 SV=1	tr|E1C7H6|E1C7H6_CHICK	N.VLLSPFSLATALSGLSLGAGERTEDVISR.A	Y	20	2958.6	29	3	987.211	3	38.85		F38:773	1	76	104
Sample 2	7	4	Collagen alpha-1(I) chain OS=Gallus gallus GN=COL1A1 PE=1 SV=3	P02457|CO1A1_CHICK	K.TSRLPIIDLAPMDVGAPDQEFGIDIGPVC(+57.02)FL	Y	28.54	3355.68	31	-2.5	1119.57	3	40.52		F38:789	2	1423	1453	Carbamidomethylation	C29:Carbamidomethylation:1000.00
Sample 2	5	7	Uncharacterized protein OS=Gallus gallus GN=AHSG PE=4 SV=1	tr|E1BZE1|E1BZE1_CHICK	R.VLFQGPNNEILFLEL.D	Y	20.05	1744.94	15	1.8	873.479	2	40.55		F38:790	1	65	79
Sample 2	1	6	Apolipoprotein A-I OS=Gallus gallus GN=APOA1 PE=1 SV=2	P08250|APOA1_CHICK	H.DEPQTPLDRIRDMVDVYLETVKAS.G	Y	16.85	2789.39	24	1	930.805	3	40.75		F38:793	1	25	48
Sample 2	17	259	Uncharacterized protein (Fragment) OS=Gallus gallus GN=COL5A1 PE=4 SV=2	tr|F1NI79|F1NI79_CHICK	F.E(+43.01)GDIQQLLIVADPR.A	Y	16.38	1608.85	14	-4.7	805.427	2	42.49		F38:813	1	183	196	Carbamylation	E1:Carbamylation:1000.00
Sample 2	17	260	Alpha 1 (V) collagen OS=Gallus gallus PE=2 SV=1	tr|Q9IAU4|Q9IAU4_CHICK	F.E(+43.01)GDIQQLLIVADPR.A	Y	16.38	1608.85	14	-4.7	805.427	2	42.49		F38:813	1	215	228	Carbamylation	E1:Carbamylation:1000.00
Sample 2	4	8	SPARC OS=Gallus gallus GN=SPARC PE=4 SV=1	tr|F1P291|F1P291_CHICK	L.RAPLIPM(+15.99)EHC(+57.02)TTR.F	Y	34.72	1596.79	13	1	533.27	3	13.01		F38:97	1	251	263	Oxidation (M); Carbamidomethylation	M7:Oxidation (M):1000.00;C10:Carbamidomethylation:1000.00
