# Supplementary material for: Bone protein “extractomics”: comparing the efficiency of bone protein extractions of Gallus gallus in tandem mass spectrometry, with an eye towards paleoproteomics
Source: PeerJ. 2016 Oct 27;4:e2603. doi: 10.7717/peerj.2603 (PMC5088622; doi:10.7717/peerj.2603)
Supplement: Table S15 [file peerj-04-2603-s019.xlsx]

## Sheet: Peptides
Table S15. Peptides identified in samples from Method 1, precipitated GuHCl (5 mL/g), post-HCl (5-H/GuHCl-P) @ 1% FDR
Sample #	Protein Group	Protein ID	Protein Description	Protein Accession	Peptide	Unique	-10lgP	Mass	Length	ppm	m/z	z	RT	Area	Scan	#Spec	Start	End	PTM	AScore
Sample 1	2	4	Collagen alpha-1(I) chain OS=Gallus gallus GN=COL1A1 PE=1 SV=3	P02457|CO1A1_CHICK	R.GAP(+15.99)GPP(+15.99)GAVGAAGKDGEAGAQGPP(+15.99)GPTGPAGER.G	Y	42.07	2855.34	33	2.1	952.79	3	13.1		F15:132	2	588	620	Oxidation or Hydroxylation	P3:Oxidation or Hydroxylation:32.28;P6:Oxidation or Hydroxylation:17.01;P24:Oxidation or Hydroxylation:94.89
Sample 1	2	4	Collagen alpha-1(I) chain OS=Gallus gallus GN=COL1A1 PE=1 SV=3	P02457|CO1A1_CHICK	R.GAP(+15.99)GPP(+15.99)GAVGAAGKDGEAGAQGPPGPTGPAGER.G	Y	37.04	2839.35	33	1.5	947.458	3	13.7		F15:150	2	588	620	Oxidation or Hydroxylation	P3:Oxidation or Hydroxylation:14.04;P6:Oxidation or Hydroxylation:17.01
Sample 1	1	1	Collagen alpha-2(I) chain OS=Gallus gallus GN=COL1A2 PE=4 SV=1	tr|F1P0H9|F1P0H9_CHICK	D.GNKGEPGN(+15.99)VGPAGAP(+15.99)GPAGPGGIPGER(+15.99).G	Y	20.75	2414.16	27	1.1	805.727	3	13.99		F15:160	2	618	644	Oxidation or Hydroxylation	N8:Oxidation or Hydroxylation:0.00;P15:Oxidation or Hydroxylation:11.10;R27:Oxidation or Hydroxylation:0.00
Sample 1	1	1	Collagen alpha-2(I) chain OS=Gallus gallus GN=COL1A2 PE=4 SV=1	tr|F1P0H9|F1P0H9_CHICK	R.GASGPVGAKGPN(+.98)GDAGRPGEP(+15.99)GLM(+15.99)GPR.G	Y	27.59	2491.19	27	1	623.805	4	14.19		F15:166	1	423	449	Deamidation (NQ); Oxidation or Hydroxylation; Oxidation (M)	N12:Deamidation (NQ):1000.00;P21:Oxidation or Hydroxylation:0.00;M24:Oxidation (M):1000.00
Sample 1	1	1	Collagen alpha-2(I) chain OS=Gallus gallus GN=COL1A2 PE=4 SV=1	tr|F1P0H9|F1P0H9_CHICK	R.GLHGEFGVPGPAGPRGER(+15.99).G	Y	36.61	1804.9	18	0	602.64	3	14.63		F15:181	1	573	590	Oxidation or Hydroxylation	R18:Oxidation or Hydroxylation:0.00
Sample 1	1	1	Collagen alpha-2(I) chain OS=Gallus gallus GN=COL1A2 PE=4 SV=1	tr|F1P0H9|F1P0H9_CHICK	R.GLP(+15.99)GAIGAP(+15.99)GPAGGAGDRGEGGPAGPAGPAGAR.G	Y	29.37	2724.33	33	1	909.119	3	15.56		F15:211	7	675	707	Oxidation or Hydroxylation	P3:Oxidation or Hydroxylation:113.22;P9:Oxidation or Hydroxylation:9.40
Sample 1	1	1	Collagen alpha-2(I) chain OS=Gallus gallus GN=COL1A2 PE=4 SV=1	tr|F1P0H9|F1P0H9_CHICK	R.VGP(+15.99)P(+15.99)GPAGITGPP(+15.99)GPP(+15.99)GPAGK.D	Y	19.1	1840.93	21	1.2	921.474	2	15.59		F15:212	1	794	814	Oxidation or Hydroxylation	P3:Oxidation or Hydroxylation:28.36;P4:Oxidation or Hydroxylation:7.32;P13:Oxidation or Hydroxylation:10.11;P16:Oxidation or Hydroxylation:10.11
Sample 1	1	1	Collagen alpha-2(I) chain OS=Gallus gallus GN=COL1A2 PE=4 SV=1	tr|F1P0H9|F1P0H9_CHICK	R.GPP(+15.99)GPSGPPGKDGRN(+.98)GLP(+15.99)GPIGPAGVR.G	Y	34.88	2493.27	27	0.6	624.326	4	15.84		F15:221	3	1053	1079	Oxidation or Hydroxylation; Deamidation (NQ)	P3:Oxidation or Hydroxylation:12.28;N15:Deamidation (NQ):1000.00;P18:Oxidation or Hydroxylation:14.04
Sample 1	2	4	Collagen alpha-1(I) chain OS=Gallus gallus GN=COL1A1 PE=1 SV=3	P02457|CO1A1_CHICK	R.GLTGPIGPPGPAGAPGDK(+42.01)GE(+21.98)AGPPGPAGPTGAR.G	Y	16.43	2894.43	33	-3.2	965.814	3	16.1		F15:230	1	753	785	Acetylation (K); Sodium adduct	K18:Acetylation (K):1000.00;E20:Sodium adduct:4.52
Sample 1	1	1	Collagen alpha-2(I) chain OS=Gallus gallus GN=COL1A2 PE=4 SV=1	tr|F1P0H9|F1P0H9_CHICK	R.GPPGPSGPPGKD(+15.99)GRN(+.98)GLPGPIGPAGVR.G	Y	17.55	2477.28	27	0.3	620.327	4	16.16		F15:232	1	1053	1079	Oxidation or Hydroxylation; Deamidation (NQ)	D12:Oxidation or Hydroxylation:0.00;N15:Deamidation (NQ):1000.00
Sample 1	2	4	Collagen alpha-1(I) chain OS=Gallus gallus GN=COL1A1 PE=1 SV=3	P02457|CO1A1_CHICK	K.Q(+42.01)GPSGASGERGPPGP(+15.99)MGPPGLAGPPGEAGR(+15.99).E	Y	19.73	2768.29	30	1.4	923.773	3	16.24		F15:234	1	974	1003	Acetylation (N-term); Oxidation or Hydroxylation	Q1:Acetylation (N-term):1000.00;P15:Oxidation or Hydroxylation:0.00;R30:Oxidation or Hydroxylation:0.00
Sample 1	2	4	Collagen alpha-1(I) chain OS=Gallus gallus GN=COL1A1 PE=1 SV=3	P02457|CO1A1_CHICK	K.GSP(+15.99)GADGPIGAP(+15.99)GTP(+15.99)GPQGIAGQR.G	Y	29.19	2162.04	24	2.1	1082.03	2	16.27		F15:235	2	924	947	Oxidation or Hydroxylation	P3:Oxidation or Hydroxylation:0.00;P12:Oxidation or Hydroxylation:67.69;P15:Oxidation or Hydroxylation:15.73
Sample 1	1	1	Collagen alpha-2(I) chain OS=Gallus gallus GN=COL1A2 PE=4 SV=1	tr|F1P0H9|F1P0H9_CHICK	R.GLHGEFGVP(+15.99)GPAGPR.G	Y	38.54	1462.73	15	1.2	732.374	2	16.36		F15:238	4	573	587	Oxidation or Hydroxylation	P9:Oxidation or Hydroxylation:20.41
Sample 1	2	4	Collagen alpha-1(I) chain OS=Gallus gallus GN=COL1A1 PE=1 SV=3	P02457|CO1A1_CHICK	R.GLTGPIGPP(+15.99)GPAGAPGD(+15.99)KGEAGPP(+15.99)GPAGPTGAR.G	Y	43.73	2878.42	33	1.7	960.482	3	16.39		F15:239	6	753	785	Oxidation or Hydroxylation	P9:Oxidation or Hydroxylation:33.81;D17:Oxidation or Hydroxylation:49.54;P24:Oxidation or Hydroxylation:48.12
Sample 1	2	4	Collagen alpha-1(I) chain OS=Gallus gallus GN=COL1A1 PE=1 SV=3	P02457|CO1A1_CHICK	R.GLTGPIGPPGP(+15.99)AGAPGDKGEAGPPGP(+15.99)AGPTGAR.G	Y	15.05	2862.43	33	-6.1	955.143	3	17.32		F15:271	1	753	785	Oxidation or Hydroxylation	P11:Oxidation or Hydroxylation:0.00;P26:Oxidation or Hydroxylation:0.00
Sample 1	1	1	Collagen alpha-2(I) chain OS=Gallus gallus GN=COL1A2 PE=4 SV=1	tr|F1P0H9|F1P0H9_CHICK	R.GLP(+15.99)GESGAVGPAGPIGSR.G	Y	35.98	1593.81	18	1.4	797.914	2	17.43		F15:274	2	591	608	Oxidation or Hydroxylation	P3:Oxidation or Hydroxylation:112.87
Sample 1	1	1	Collagen alpha-2(I) chain OS=Gallus gallus GN=COL1A2 PE=4 SV=1	tr|F1P0H9|F1P0H9_CHICK	R.GLP(+15.99)GESGAVGP(+31.99)AGPIGSR.G	Y	28.33	1625.8	18	0.4	813.908	2	17.53		F15:278	2	591	608	Oxidation or Hydroxylation; Dihydroxy	P3:Oxidation or Hydroxylation:59.08;P11:Dihydroxy:22.69
Sample 1	1	1	Collagen alpha-2(I) chain OS=Gallus gallus GN=COL1A2 PE=4 SV=1	tr|F1P0H9|F1P0H9_CHICK	R.VGPIGPAGNRGEP(+15.99)GNIGFP(+15.99)GPK.G	Y	35.81	2119.08	22	1.2	1060.55	2	18.23	54000000	F15:302	4	476	497	Oxidation or Hydroxylation	P13:Oxidation or Hydroxylation:0.00;P19:Oxidation or Hydroxylation:0.00
Sample 1	2	4	Collagen alpha-1(I) chain OS=Gallus gallus GN=COL1A1 PE=1 SV=3	P02457|CO1A1_CHICK	R.GFSGLQGP(+15.99)PGPP(+15.99)GAP(+15.99)GEQGPSGASGPAGPR.G	Y	34.38	2688.25	30	1.3	897.093	3	18.28	124000000	F15:304	1	1101	1130	Oxidation or Hydroxylation	P8:Oxidation or Hydroxylation:22.09;P12:Oxidation or Hydroxylation:17.73;P15:Oxidation or Hydroxylation:42.68
Sample 1	2	4	Collagen alpha-1(I) chain OS=Gallus gallus GN=COL1A1 PE=1 SV=3	P02457|CO1A1_CHICK	R.GFSGLQGPP(+15.99)GPP(+15.99)GAP(+15.99)GEQGPSGASGPAGPR.G	Y	45.82	2688.25	30	1.1	1345.14	2	18.39	62300000	F15:308	6	1101	1130	Oxidation or Hydroxylation	P9:Oxidation or Hydroxylation:27.66;P12:Oxidation or Hydroxylation:79.67;P15:Oxidation or Hydroxylation:118.11
Sample 1	2	4	Collagen alpha-1(I) chain OS=Gallus gallus GN=COL1A1 PE=1 SV=3	P02457|CO1A1_CHICK	R.GFSGLQGPPGP(+15.99)P(+15.99)GAP(+15.99)GEQGPSGASGPAGPR.G	Y	35.95	2688.25	30	1.8	897.093	3	18.45	124000000	F15:310	1	1101	1130	Oxidation or Hydroxylation	P11:Oxidation or Hydroxylation:9.42;P12:Oxidation or Hydroxylation:19.86;P15:Oxidation or Hydroxylation:30.64
Sample 1	2	4	Collagen alpha-1(I) chain OS=Gallus gallus GN=COL1A1 PE=1 SV=3	P02457|CO1A1_CHICK	R.GQAGVMGFPGP(+15.99)K.G	Y	34.55	1160.56	12	0.7	581.29	2	18.56		F15:314	1	564	575	Oxidation or Hydroxylation	P11:Oxidation or Hydroxylation:0.00
Sample 1	1	1	Collagen alpha-2(I) chain OS=Gallus gallus GN=COL1A2 PE=4 SV=1	tr|F1P0H9|F1P0H9_CHICK	K.GAAGLP(+15.99)GVAGAP(+15.99)GLPGP(+15.99)R.G	Y	37.07	1561.82	18	1.6	781.919	2	18.61		F15:316	4	309	326	Oxidation or Hydroxylation	P6:Oxidation or Hydroxylation:161.52;P12:Oxidation or Hydroxylation:29.32;P17:Oxidation or Hydroxylation:0.00
Sample 1	2	4	Collagen alpha-1(I) chain OS=Gallus gallus GN=COL1A1 PE=1 SV=3	P02457|CO1A1_CHICK	R.GLP(+15.99)GTAGLP(+15.99)GMK.G	Y	28.74	1129.58	12	1.1	565.798	2	18.64	4230000	F15:317	1	243	254	Oxidation or Hydroxylation	P3:Oxidation or Hydroxylation:85.33;P9:Oxidation or Hydroxylation:5.08
Sample 1	1	1	Collagen alpha-2(I) chain OS=Gallus gallus GN=COL1A2 PE=4 SV=1	tr|F1P0H9|F1P0H9_CHICK	K.GAAGLP(+15.99)GVAGAP(+15.99)GLP(+15.99)GPR.G	Y	34.14	1561.82	18	1.2	781.919	2	18.7		F15:319	1	309	326	Oxidation or Hydroxylation	P6:Oxidation or Hydroxylation:112.13;P12:Oxidation or Hydroxylation:32.32;P15:Oxidation or Hydroxylation:5.47
Sample 1	1	1	Collagen alpha-2(I) chain OS=Gallus gallus GN=COL1A2 PE=4 SV=1	tr|F1P0H9|F1P0H9_CHICK	K.GP(+15.99)KGETGPTGAIGPIGASGPP(+15.99)GPVGAAGPAGPR.G	Y	46.37	2836.45	33	1.1	946.49	3	18.73		F15:320	3	744	776	Oxidation or Hydroxylation	P2:Oxidation or Hydroxylation:0.00;P21:Oxidation or Hydroxylation:72.07
Sample 1	2	4	Collagen alpha-1(I) chain OS=Gallus gallus GN=COL1A1 PE=1 SV=3	P02457|CO1A1_CHICK	R.GQAGVMGFPGPK(+15.99).G	Y	33.99	1160.56	12	0.8	581.29	2	18.75		F15:321	1	564	575	Oxidation or Hydroxylation	K12:Oxidation or Hydroxylation:0.00
Sample 1	2	4	Collagen alpha-1(I) chain OS=Gallus gallus GN=COL1A1 PE=1 SV=3	P02457|CO1A1_CHICK	R.GFSGLQGP(+15.99)PGPPGAP(+15.99)GEQGPSGASGPAGPR.G	Y	23.63	2672.26	30	1.4	891.761	3	19.25		F15:338	2	1101	1130	Oxidation or Hydroxylation	P8:Oxidation or Hydroxylation:0.00;P15:Oxidation or Hydroxylation:28.36
Sample 1	2	4	Collagen alpha-1(I) chain OS=Gallus gallus GN=COL1A1 PE=1 SV=3	P02457|CO1A1_CHICK	R.GFSGLQGPP(+15.99)GPPGAP(+15.99)GEQGPSGASGPAGPR.G	Y	45.38	2672.26	30	1.8	1337.14	2	19.28		F15:339	2	1101	1130	Oxidation or Hydroxylation	P9:Oxidation or Hydroxylation:38.64;P15:Oxidation or Hydroxylation:54.71
Sample 1	1	1	Collagen alpha-2(I) chain OS=Gallus gallus GN=COL1A2 PE=4 SV=1	tr|F1P0H9|F1P0H9_CHICK	R.GEIGLP(+15.99)GSSGPVGPP(+15.99)GNP(+15.99)GAN(+.98)GLP(+15.99)GAK.G	Y	16.75	2418.17	27	1.3	1210.09	2	19.55		F15:348	1	282	308	Oxidation or Hydroxylation; Deamidation (NQ)	P6:Oxidation or Hydroxylation:23.70;P15:Oxidation or Hydroxylation:8.69;P18:Oxidation or Hydroxylation:40.00;N21:Deamidation (NQ):42.68;P24:Oxidation or Hydroxylation:0.00
Sample 1	2	4	Collagen alpha-1(I) chain OS=Gallus gallus GN=COL1A1 PE=1 SV=3	P02457|CO1A1_CHICK	K.DGLNGLP(+15.99)GPIGP(+15.99)PGPR(+15.99).G	Y	28.64	1560.79	16	0.8	781.403	2	19.77		F15:355	1	1142	1157	Oxidation or Hydroxylation	P7:Oxidation or Hydroxylation:26.31;P12:Oxidation or Hydroxylation:0.00;R16:Oxidation or Hydroxylation:0.00
Sample 1	1	1	Collagen alpha-2(I) chain OS=Gallus gallus GN=COL1A2 PE=4 SV=1	tr|F1P0H9|F1P0H9_CHICK	R.GSDGSAGPTGPAGPIGAAGPP(+15.99)GF(+15.99)PGAP(+15.99)GAK.G	Y	45.78	2520.19	30	2.1	1261.1	2	20.17		F15:369	1	234	263	Oxidation or Hydroxylation	P21:Oxidation or Hydroxylation:102.29;F23:Oxidation or Hydroxylation:112.27;P27:Oxidation or Hydroxylation:115.60
Sample 1	1	1	Collagen alpha-2(I) chain OS=Gallus gallus GN=COL1A2 PE=4 SV=1	tr|F1P0H9|F1P0H9_CHICK	R.GSDGSAGPTGPAGPIGAAGPP(+15.99)GFP(+15.99)GAP(+15.99)GAK.G	Y	45.48	2520.19	30	1.4	1261.1	2	20.41		F15:377	3	234	263	Oxidation or Hydroxylation	P21:Oxidation or Hydroxylation:110.43;P24:Oxidation or Hydroxylation:150.82;P27:Oxidation or Hydroxylation:134.51
Sample 1	1	1	Collagen alpha-2(I) chain OS=Gallus gallus GN=COL1A2 PE=4 SV=1	tr|F1P0H9|F1P0H9_CHICK	R.N(+.98)GLP(+15.99)GPIGPAGVR.G	Y	34.66	1220.65	13	1	611.333	2	20.62		F15:384	4	1067	1079	Deamidation (NQ); Oxidation or Hydroxylation	N1:Deamidation (NQ):1000.00;P4:Oxidation or Hydroxylation:60.92
Sample 1	4	262	Uncharacterized protein OS=Gallus gallus PE=4 SV=2	tr|F1NBA6|F1NBA6_CHICK	K.GDIGLP(+15.99)GPP(+15.99)GPPGLVG(+15.99).I	Y	27.25	1446.74	16	8.5	724.381	2	20.67		F15:386	2	2356	2371	Oxidation or Hydroxylation	P6:Oxidation or Hydroxylation:52.04;P9:Oxidation or Hydroxylation:14.02;G16:Oxidation or Hydroxylation:7.38
Sample 1	1	1	Collagen alpha-2(I) chain OS=Gallus gallus GN=COL1A2 PE=4 SV=1	tr|F1P0H9|F1P0H9_CHICK	K.GETGPTGAIGPIGASGPP(+15.99)GPVGAAGPAGPR.G	Y	42.01	2538.28	30	1.7	1270.15	2	21.16		F15:401	2	747	776	Oxidation or Hydroxylation	P18:Oxidation or Hydroxylation:64.84
Sample 1	1	1	Collagen alpha-2(I) chain OS=Gallus gallus GN=COL1A2 PE=4 SV=1	tr|F1P0H9|F1P0H9_CHICK	D.P(+15.99)GPVGPVGPAGAFGPR.G	Y	42.64	1447.76	16	0.7	724.886	2	21.19		F15:402	3	980	995	Oxidation or Hydroxylation	P1:Oxidation or Hydroxylation:14.63
Sample 1	1	1	Collagen alpha-2(I) chain OS=Gallus gallus GN=COL1A2 PE=4 SV=1	tr|F1P0H9|F1P0H9_CHICK	R.GDP(+15.99)GPVGPVGPAGAFGPR.G	Y	45.48	1619.81	18	0.7	810.911	2	21.4		F15:409	4	978	995	Oxidation or Hydroxylation	P3:Oxidation or Hydroxylation:17.01
Sample 1	1	1	Collagen alpha-2(I) chain OS=Gallus gallus GN=COL1A2 PE=4 SV=1	tr|F1P0H9|F1P0H9_CHICK	D.PGPVGPVGPAGAFGPR.G	Y	34.15	1431.76	16	1.1	716.889	2	21.66		F15:418	4	980	995
Sample 1	1	1	Collagen alpha-2(I) chain OS=Gallus gallus GN=COL1A2 PE=4 SV=1	tr|F1P0H9|F1P0H9_CHICK	R.GFP(+15.99)GTP(+15.99)GLPGFK(+15.99).G	Y	26.3	1221.6	12	0.8	611.809	2	21.74		F15:421	2	165	176	Oxidation or Hydroxylation	P3:Oxidation or Hydroxylation:14.02;P6:Oxidation or Hydroxylation:38.16;K12:Oxidation or Hydroxylation:0.00
Sample 1	1	1	Collagen alpha-2(I) chain OS=Gallus gallus GN=COL1A2 PE=4 SV=1	tr|F1P0H9|F1P0H9_CHICK	R.GFP(+15.99)GTP(+15.99)GLPGF(+15.99)K.G	Y	28.63	1221.6	12	0.6	611.809	2	21.92		F15:427	1	165	176	Oxidation or Hydroxylation	P3:Oxidation or Hydroxylation:8.69;P6:Oxidation or Hydroxylation:38.16;F11:Oxidation or Hydroxylation:0.00
Sample 1	1	1	Collagen alpha-2(I) chain OS=Gallus gallus GN=COL1A2 PE=4 SV=1	tr|F1P0H9|F1P0H9_CHICK	R.GLP(+15.99)GIAGATGEP(+15.99)GPLGVSGPPGAR(+15.99).G	Y	40.2	2132.09	24	1.3	1067.05	2	22.25		F15:437	19	882	905	Oxidation or Hydroxylation	P3:Oxidation or Hydroxylation:195.68;P12:Oxidation or Hydroxylation:36.05;R24:Oxidation or Hydroxylation:0.00
Sample 1	5	85	Uncharacterized protein OS=Gallus gallus GN=COL4A6 PE=4 SV=2	tr|F1P3T8|F1P3T8_CHICK	R.GDVGPPGLPVLGAQ(+.98)EQA.L	Y	23	1604.8	17	6.9	803.415	2	22.3		F15:439	1	957	973	Deamidation (NQ)	Q14:Deamidation (NQ):0.00
Sample 1	1	1	Collagen alpha-2(I) chain OS=Gallus gallus GN=COL1A2 PE=4 SV=1	tr|F1P0H9|F1P0H9_CHICK	K.GETGPTGAIGPIGASGP(+15.99)PGPVGAAGPAGPRGD(+15.99)AGPPGMTGFPGAAGR(+15.99).V	Y	28.2	4066.96	47	1	1017.75	4	22.94		F15:455	1	747	793	Oxidation or Hydroxylation	P17:Oxidation or Hydroxylation:0.00;D32:Oxidation or Hydroxylation:0.00;R47:Oxidation or Hydroxylation:0.00
Sample 1	1	1	Collagen alpha-2(I) chain OS=Gallus gallus GN=COL1A2 PE=4 SV=1	tr|F1P0H9|F1P0H9_CHICK	K.GETGPTGAIGPIGASGP(+15.99)PGPVGAAGPAGPRGDAGPP(+15.99)GMTGFP(+15.99)GAAGR.V	Y	45.1	4066.96	47	2.1	1356.66	3	22.96		F15:456	1	747	793	Oxidation or Hydroxylation	P17:Oxidation or Hydroxylation:83.60;P36:Oxidation or Hydroxylation:65.10;P42:Oxidation or Hydroxylation:54.97
Sample 1	1	1	Collagen alpha-2(I) chain OS=Gallus gallus GN=COL1A2 PE=4 SV=1	tr|F1P0H9|F1P0H9_CHICK	R.GLP(+15.99)GIAGATGEPGPLGVSGPPGAR(+15.99).G	Y	36.66	2116.09	24	1.1	1059.05	2	23.29		F15:464	2	882	905	Oxidation or Hydroxylation	P3:Oxidation or Hydroxylation:159.26;R24:Oxidation or Hydroxylation:0.00
Sample 1	1	1	Collagen alpha-2(I) chain OS=Gallus gallus GN=COL1A2 PE=4 SV=1	tr|F1P0H9|F1P0H9_CHICK	D.PSK(+15.99)AADFGPGPMGLMGPR.G	Y	39.86	1800.87	18	1.1	601.296	3	23.32		F15:465	1	81	98	Oxidation or Hydroxylation	K3:Oxidation or Hydroxylation:9.40
Sample 1	1	1	Collagen alpha-2(I) chain OS=Gallus gallus GN=COL1A2 PE=4 SV=1	tr|F1P0H9|F1P0H9_CHICK	R.GLP(+15.99)GIAGATGEPGPLGVSGPP(+15.99)GAR.G	Y	38.27	2116.09	24	0.7	706.371	3	23.42		F15:468	1	882	905	Oxidation or Hydroxylation	P3:Oxidation or Hydroxylation:126.05;P21:Oxidation or Hydroxylation:0.00
Sample 1	1	1	Collagen alpha-2(I) chain OS=Gallus gallus GN=COL1A2 PE=4 SV=1	tr|F1P0H9|F1P0H9_CHICK	R.GLP(+15.99)GIAGATGEPGPLGVSGP(+15.99)PGAR.G	Y	35.69	2116.09	24	1.8	1059.05	2	23.56		F15:472	3	882	905	Oxidation or Hydroxylation	P3:Oxidation or Hydroxylation:106.84;P20:Oxidation or Hydroxylation:0.00
Sample 1	3	8	SPARC OS=Gallus gallus GN=SPARC PE=4 SV=1	tr|F1P291|F1P291_CHICK	K.EQDIDKDLVI	Y	22.88	1186.61	10	1	594.312	2	24.6		F15:500	1	289	298
Sample 1	3	9	SPARC OS=Gallus gallus GN=SPARC PE=2 SV=1	P36377|SPRC_CHICK	K.EQDIDKDLVI	Y	22.88	1186.61	10	1	594.312	2	24.6		F15:500	1	289	298
Sample 1	1	1	Collagen alpha-2(I) chain OS=Gallus gallus GN=COL1A2 PE=4 SV=1	tr|F1P0H9|F1P0H9_CHICK	D.FGPGPMGLMGPR.G	Y	36.89	1215.59	12	0.6	608.802	2	25.58		F15:526	3	87	98
Sample 1	1	1	Collagen alpha-2(I) chain OS=Gallus gallus GN=COL1A2 PE=4 SV=1	tr|F1P0H9|F1P0H9_CHICK	K.AADFGP(+15.99)GPMGLMGPR.G	Y	34.91	1488.69	15	1.2	745.351	2	25.65		F15:528	1	84	98	Oxidation or Hydroxylation	P6:Oxidation or Hydroxylation:45.01
Sample 1	1	1	Collagen alpha-2(I) chain OS=Gallus gallus GN=COL1A2 PE=4 SV=1	tr|F1P0H9|F1P0H9_CHICK	D.FGPGPM(+15.99)GLM(+15.99)GPR.G	Y	32.67	1247.58	12	0.4	624.797	2	25.86		F15:532	3	87	98	Oxidation (M)	M6:Oxidation (M):1000.00;M9:Oxidation (M):1000.00
Sample 1	1	1	Collagen alpha-2(I) chain OS=Gallus gallus GN=COL1A2 PE=4 SV=1	tr|F1P0H9|F1P0H9_CHICK	K.AADFGPGPM(+15.99)GLM(+15.99)GPR.G	Y	42.7	1504.68	15	1.6	753.349	2	26.55		F15:549	2	84	98	Oxidation (M)	M9:Oxidation (M):1000.00;M12:Oxidation (M):1000.00
Sample 1	1	1	Collagen alpha-2(I) chain OS=Gallus gallus GN=COL1A2 PE=4 SV=1	tr|F1P0H9|F1P0H9_CHICK	K.AADFGPGPMGLMGPR.G	Y	46.7	1472.69	15	1.4	737.354	2	26.7		F15:553	4	84	98
Sample 1	1	1	Collagen alpha-2(I) chain OS=Gallus gallus GN=COL1A2 PE=4 SV=1	tr|F1P0H9|F1P0H9_CHICK	A.Q(-17.03)YDPSK(+15.99)AADFGPGPMGLMGPR.G	Y	32.62	2189.99	21	0.9	1096	2	28.63		F15:600	2	78	98	Pyro-glu from Q; Oxidation or Hydroxylation	Q1:Pyro-glu from Q:1000.00;K6:Oxidation or Hydroxylation:26.31
Sample 1	8	1205	Uncharacterized protein (Fragment) OS=Gallus gallus GN=KRT8 PE=3 SV=2	tr|H9KZP2|H9KZP2_CHICK	R.SLDLDSIIAEVK.A	Y	35.18	1301.71	12	0.8	651.862	2	32.14		F15:662	1	148	159
Sample 1	3	8	SPARC OS=Gallus gallus GN=SPARC PE=4 SV=1	tr|F1P291|F1P291_CHICK	K.FIPAC(+57.02)LDTELTEFPLR.M	Y	40.12	1920.97	16	-0.1	961.49	2	33.04		F15:679	5	146	161	Carbamidomethylation	C5:Carbamidomethylation:1000.00
Sample 1	3	9	SPARC OS=Gallus gallus GN=SPARC PE=2 SV=1	P36377|SPRC_CHICK	K.FIPAC(+57.02)LDTELTEFPLR.M	Y	40.12	1920.97	16	-0.1	961.49	2	33.04		F15:679	5	146	161	Carbamidomethylation	C5:Carbamidomethylation:1000.00
Sample 1	10	20	Vitronectin OS=Gallus gallus PE=2 SV=1	tr|O12945|O12945_CHICK	K.LISDVWGIEGPIDAAFTR.I	Y	30.72	1959.01	18	1.1	980.513	2	34.58		F15:702	1	193	210
Sample 1	10	21	Uncharacterized protein OS=Gallus gallus GN=VTN PE=4 SV=2	tr|E1C7A7|E1C7A7_CHICK	K.LISDVWGIEGPIDAAFTR.I	Y	30.72	1959.01	18	1.1	980.513	2	34.58		F15:702	1	193	210
Sample 1	1	1	Collagen alpha-2(I) chain OS=Gallus gallus GN=COL1A2 PE=4 SV=1	tr|F1P0H9|F1P0H9_CHICK	R.VGPIGPAGNRGEP(+15.99)GNIGFPGPK(+15.99).G	Y	29.09	2119.08	22	0.2	707.368	3	35.59		F15:712	3	476	497	Oxidation or Hydroxylation	P13:Oxidation or Hydroxylation:0.00;K22:Oxidation or Hydroxylation:0.00
Sample 1	2	4	Collagen alpha-1(I) chain OS=Gallus gallus GN=COL1A1 PE=1 SV=3	P02457|CO1A1_CHICK	R.GLTGPIGPP(+15.99)GPAGAP(+15.99)GDKGEAGPP(+15.99)GPAGPTGAR.G	Y	45.32	2878.42	33	-0.5	960.48	3	36.65		F15:721	14	753	785	Oxidation or Hydroxylation	P9:Oxidation or Hydroxylation:49.79;P15:Oxidation or Hydroxylation:46.31;P24:Oxidation or Hydroxylation:90.97
Sample 1	1	1	Collagen alpha-2(I) chain OS=Gallus gallus GN=COL1A2 PE=4 SV=1	tr|F1P0H9|F1P0H9_CHICK	R.GLP(+15.99)GIAGATGEPGP(+15.99)LGVSGPPGAR(+15.99).G	Y	15.58	2132.09	24	1.4	711.704	3	40.06		F15:748	1	882	905	Oxidation or Hydroxylation	P3:Oxidation or Hydroxylation:61.14;P14:Oxidation or Hydroxylation:0.00;R24:Oxidation or Hydroxylation:6.65
Sample 1	6	618	Uncharacterized protein OS=Gallus gallus GN=COL11A1 PE=4 SV=2	tr|F1P4K9|F1P4K9_CHICK	R.ILDEEVFEGEIQQLLIIADPR.A	Y	25.37	2439.29	21	0.9	814.105	3	41.54		F15:760	1	213	233
Sample 1	2	4	Collagen alpha-1(I) chain OS=Gallus gallus GN=COL1A1 PE=1 SV=3	P02457|CO1A1_CHICK	K.GATGAP(+15.99)GIAGAPGF(+15.99)P(+15.99)GAR.G	Y	21.54	1571.77	18	2.2	786.894	2	11.24		F15:80	1	387	404	Oxidation or Hydroxylation	P6:Oxidation or Hydroxylation:72.73;F14:Oxidation or Hydroxylation:7.32;P15:Oxidation or Hydroxylation:5.77
Sample 2	1	1	Collagen alpha-2(I) chain OS=Gallus gallus GN=COL1A2 PE=4 SV=1	tr|F1P0H9|F1P0H9_CHICK	R.GASGPVGAKGPN(+.98)GDAGR(+15.99)PGEPGLM(+15.99)GPR.G	Y	33.71	2491.19	27	1	623.805	4	14.24		F16:159	1	423	449	Deamidation (NQ); Oxidation or Hydroxylation; Oxidation (M)	N12:Deamidation (NQ):1000.00;R17:Oxidation or Hydroxylation:0.00;M24:Oxidation (M):1000.00
Sample 2	1	1	Collagen alpha-2(I) chain OS=Gallus gallus GN=COL1A2 PE=4 SV=1	tr|F1P0H9|F1P0H9_CHICK	R.VGP(+15.99)P(+15.99)GPAGITGP(+15.99)PGP(+15.99)PGPAGKDGPR.G	Y	15.96	2266.13	25	1.1	756.386	3	14.67		F16:173	1	794	818	Oxidation or Hydroxylation	P3:Oxidation or Hydroxylation:38.16;P4:Oxidation or Hydroxylation:26.31;P12:Oxidation or Hydroxylation:0.00;P15:Oxidation or Hydroxylation:0.00
Sample 2	1	1	Collagen alpha-2(I) chain OS=Gallus gallus GN=COL1A2 PE=4 SV=1	tr|F1P0H9|F1P0H9_CHICK	R.GPSGPPGPDGNKGEPGNM(sub V)GPAGAP(+15.99)GPAGPGGIP(+15.99)GER.G	Y	15.58	3191.47	36	6.8	1064.84	3	14.79		F16:177	1	609	644	Oxidation or Hydroxylation; Mutation	P24:Oxidation or Hydroxylation:10.88;P33:Oxidation or Hydroxylation:0.00
Sample 2	1	1	Collagen alpha-2(I) chain OS=Gallus gallus GN=COL1A2 PE=4 SV=1	tr|F1P0H9|F1P0H9_CHICK	R.GLHGEFGVP(+15.99)GPAGPRGER.G	Y	29.36	1804.9	18	0.4	602.64	3	14.84		F16:179	1	573	590	Oxidation or Hydroxylation	P9:Oxidation or Hydroxylation:0.00
Sample 2	1	1	Collagen alpha-2(I) chain OS=Gallus gallus GN=COL1A2 PE=4 SV=1	tr|F1P0H9|F1P0H9_CHICK	R.GPP(+15.99)GPSGPPGKDGRN(+.98)GLPGP(+15.99)IGPAGVR.G	Y	17.65	2493.27	27	0.6	624.326	4	15.76		F16:209	1	1053	1079	Oxidation or Hydroxylation; Deamidation (NQ)	P3:Oxidation or Hydroxylation:17.01;N15:Deamidation (NQ):1000.00;P20:Oxidation or Hydroxylation:5.47
Sample 2	2	4	Collagen alpha-1(I) chain OS=Gallus gallus GN=COL1A1 PE=1 SV=3	P02457|CO1A1_CHICK	R.GFP(+15.99)GADGIAGPKGPP(+15.99)GER.G	Y	25.64	1710.83	18	1.3	856.425	2	15.82		F16:211	1	483	500	Oxidation or Hydroxylation	P3:Oxidation or Hydroxylation:12.28;P15:Oxidation or Hydroxylation:0.00
Sample 2	2	4	Collagen alpha-1(I) chain OS=Gallus gallus GN=COL1A1 PE=1 SV=3	P02457|CO1A1_CHICK	K.Q(+42.01)GPSGASGERGP(+15.99)PGPMGPPGLAGPPGEAGR(+15.99).E	Y	19.47	2768.29	30	0.7	923.772	3	16.34		F16:228	1	974	1003	Acetylation (N-term); Oxidation or Hydroxylation	Q1:Acetylation (N-term):1000.00;P12:Oxidation or Hydroxylation:0.00;R30:Oxidation or Hydroxylation:0.00
Sample 2	1	1	Collagen alpha-2(I) chain OS=Gallus gallus GN=COL1A2 PE=4 SV=1	tr|F1P0H9|F1P0H9_CHICK	K.GETGPAGPP(+15.99)GFQGLP(+15.99)GPSGPAGEAGKP(+15.99)GER.G	Y	42.92	2776.31	30	1.2	926.443	3	17.83		F16:278	4	543	572	Oxidation or Hydroxylation	P9:Oxidation or Hydroxylation:69.71;P15:Oxidation or Hydroxylation:45.16;P27:Oxidation or Hydroxylation:23.64
Sample 2	1	1	Collagen alpha-2(I) chain OS=Gallus gallus GN=COL1A2 PE=4 SV=1	tr|F1P0H9|F1P0H9_CHICK	R.VGPIGPAGNRGEP(+15.99)GNIGFPGP(+15.99)K.G	Y	32.47	2119.08	22	0.7	1060.55	2	18.34		F16:295	1	476	497	Oxidation or Hydroxylation	P13:Oxidation or Hydroxylation:26.31;P21:Oxidation or Hydroxylation:0.00
Sample 2	1	1	Collagen alpha-2(I) chain OS=Gallus gallus GN=COL1A2 PE=4 SV=1	tr|F1P0H9|F1P0H9_CHICK	K.GP(+15.99)KGETGPTGAIGPIGASGP(+15.99)P(+15.99)GPVGAAGPAGPR.G	Y	29.69	2852.44	33	0.8	951.822	3	18.5		F16:301	1	744	776	Oxidation or Hydroxylation	P2:Oxidation or Hydroxylation:14.02;P20:Oxidation or Hydroxylation:69.58;P21:Oxidation or Hydroxylation:71.72
Sample 2	1	1	Collagen alpha-2(I) chain OS=Gallus gallus GN=COL1A2 PE=4 SV=1	tr|F1P0H9|F1P0H9_CHICK	R.VGPIGPAGNRGEPGN(+15.99)IGFPGPK(+15.99).G	Y	21.4	2119.08	22	1.1	1060.55	2	18.78		F16:310	1	476	497	Oxidation or Hydroxylation	N15:Oxidation or Hydroxylation:5.47;K22:Oxidation or Hydroxylation:0.00
Sample 2	2	4	Collagen alpha-1(I) chain OS=Gallus gallus GN=COL1A1 PE=1 SV=3	P02457|CO1A1_CHICK	R.GQAGVMGFP(+15.99)GPK.G	Y	36.3	1160.56	12	0.7	581.29	2	18.88		F16:313	2	564	575	Oxidation or Hydroxylation	P9:Oxidation or Hydroxylation:4.64
Sample 2	1	1	Collagen alpha-2(I) chain OS=Gallus gallus GN=COL1A2 PE=4 SV=1	tr|F1P0H9|F1P0H9_CHICK	K.GPKGETGPTGAIGPIGASGPP(+15.99)GPVGAAGPAGPR.G	Y	43.22	2820.45	33	1.4	941.159	3	19.46		F16:332	4	744	776	Oxidation or Hydroxylation	P21:Oxidation or Hydroxylation:39.40
Sample 2	2	4	Collagen alpha-1(I) chain OS=Gallus gallus GN=COL1A1 PE=1 SV=3	P02457|CO1A1_CHICK	K.DGLNGLP(+15.99)GPIGPPGP(+15.99)R(+15.99).G	Y	23.52	1560.79	16	0.8	781.403	2	19.96		F16:348	1	1142	1157	Oxidation or Hydroxylation	P7:Oxidation or Hydroxylation:40.00;P15:Oxidation or Hydroxylation:3.29;R16:Oxidation or Hydroxylation:2.44
Sample 2	1	1	Collagen alpha-2(I) chain OS=Gallus gallus GN=COL1A2 PE=4 SV=1	tr|F1P0H9|F1P0H9_CHICK	K.GETGPTGAIGPIGASGP(+15.99)PGPVGAAGPAGPR.G	Y	25.95	2538.28	30	1.1	847.102	3	21.11		F16:384	1	747	776	Oxidation or Hydroxylation	P17:Oxidation or Hydroxylation:0.00
Sample 2	1	1	Collagen alpha-2(I) chain OS=Gallus gallus GN=COL1A2 PE=4 SV=1	tr|F1P0H9|F1P0H9_CHICK	K.GPKGETGPTGAIGPIGASGPP(+15.99)GPVGAAGPAGPRGDAGPP(+15.99)GMTGFPGAAGR(+15.99).V	Y	46.63	4349.12	50	1.5	1088.29	4	21.52		F16:398	1	744	793	Oxidation or Hydroxylation	P21:Oxidation or Hydroxylation:142.60;P39:Oxidation or Hydroxylation:130.32;R50:Oxidation or Hydroxylation:118.78
Sample 2	1	1	Collagen alpha-2(I) chain OS=Gallus gallus GN=COL1A2 PE=4 SV=1	tr|F1P0H9|F1P0H9_CHICK	R.GFP(+15.99)GTP(+15.99)GLP(+15.99)GFK.G	Y	26.39	1221.6	12	0.7	611.809	2	21.96		F16:412	1	165	176	Oxidation or Hydroxylation	P3:Oxidation or Hydroxylation:17.01;P6:Oxidation or Hydroxylation:26.93;P9:Oxidation or Hydroxylation:0.00
Sample 2	1	1	Collagen alpha-2(I) chain OS=Gallus gallus GN=COL1A2 PE=4 SV=1	tr|F1P0H9|F1P0H9_CHICK	D.PGPVGP(+15.99)VGPAGAFGPR.G	Y	14.35	1447.76	16	0.8	724.886	2	22.07		F16:416	1	980	995	Oxidation or Hydroxylation	P6:Oxidation or Hydroxylation:0.00
Sample 2	1	1	Collagen alpha-2(I) chain OS=Gallus gallus GN=COL1A2 PE=4 SV=1	tr|F1P0H9|F1P0H9_CHICK	R.GDPGPVGPVGPAGAFGPR.G	Y	44.86	1603.81	18	1.4	802.914	2	22.19		F16:420	4	978	995
Sample 2	1	1	Collagen alpha-2(I) chain OS=Gallus gallus GN=COL1A2 PE=4 SV=1	tr|F1P0H9|F1P0H9_CHICK	R.GDPGPVGPVGP(+15.99)AGAFGPR.G	Y	24.82	1619.81	18	-0.6	810.909	2	22.28		F16:423	1	978	995	Oxidation or Hydroxylation	P11:Oxidation or Hydroxylation:0.00
Sample 2	1	1	Collagen alpha-2(I) chain OS=Gallus gallus GN=COL1A2 PE=4 SV=1	tr|F1P0H9|F1P0H9_CHICK	R.GLP(+15.99)GIAGATGEP(+15.99)GPLGVSGP(+15.99)PGAR.G	Y	38.05	2132.09	24	1.3	1067.05	2	22.46		F16:429	4	882	905	Oxidation or Hydroxylation	P3:Oxidation or Hydroxylation:163.49;P12:Oxidation or Hydroxylation:39.76;P20:Oxidation or Hydroxylation:9.34
Sample 2	1	1	Collagen alpha-2(I) chain OS=Gallus gallus GN=COL1A2 PE=4 SV=1	tr|F1P0H9|F1P0H9_CHICK	R.GLP(+15.99)GIAGATGEPGP(+15.99)LGVSGP(+15.99)PGAR.G	Y	21.8	2132.09	24	0.5	1067.05	2	23.79		F16:461	2	882	905	Oxidation or Hydroxylation	P3:Oxidation or Hydroxylation:74.73;P14:Oxidation or Hydroxylation:0.00;P20:Oxidation or Hydroxylation:0.00
Sample 2	1	1	Collagen alpha-2(I) chain OS=Gallus gallus GN=COL1A2 PE=4 SV=1	tr|F1P0H9|F1P0H9_CHICK	D.FGPGPMGLM(+15.99)GPR.G	Y	23.37	1231.58	12	1	616.8	2	26		F16:512	1	87	98	Oxidation (M)	M9:Oxidation (M):0.00
Sample 2	7	10	Decorin OS=Gallus gallus GN=DCN PE=1 SV=1	P28675|PGS2_CHICK	K.IDAEGLSGLTNLAK.L	Y	33.84	1400.75	14	1.2	701.384	2	26.38		F16:520	1	234	247
Sample 2	7	11	Decorin OS=Gallus gallus GN=DCN PE=4 SV=2	tr|E1BRE9|E1BRE9_CHICK	K.IDAEGLSGLTNLAK.L	Y	33.84	1400.75	14	1.2	701.384	2	26.38		F16:520	1	234	247
Sample 2	2	4	Collagen alpha-1(I) chain OS=Gallus gallus GN=COL1A1 PE=1 SV=3	P02457|CO1A1_CHICK	K.ALLLQGANEIEIR.A	Y	37.04	1438.81	13	1	720.415	2	26.42		F16:521	1	1376	1388
Sample 2	1	1	Collagen alpha-2(I) chain OS=Gallus gallus GN=COL1A2 PE=4 SV=1	tr|F1P0H9|F1P0H9_CHICK	K.AADFGPGP(+15.99)MGLM(+15.99)GPR.G	Y	37.74	1504.68	15	1.4	753.348	2	26.81		F16:530	1	84	98	Oxidation or Hydroxylation; Oxidation (M)	P8:Oxidation or Hydroxylation:55.92;M12:Oxidation (M):53.53
Sample 2	3	8	SPARC OS=Gallus gallus GN=SPARC PE=4 SV=1	tr|F1P291|F1P291_CHICK	K.NVLITLYERDEDNNLLTEK.Q	Y	27.82	2291.16	19	1.8	764.73	3	27.35		F16:544	2	168	186
Sample 2	3	9	SPARC OS=Gallus gallus GN=SPARC PE=2 SV=1	P36377|SPRC_CHICK	K.NVLITLYERDEDNNLLTEK.Q	Y	27.82	2291.16	19	1.8	764.73	3	27.35		F16:544	2	168	186
Sample 2	1	1	Collagen alpha-2(I) chain OS=Gallus gallus GN=COL1A2 PE=4 SV=1	tr|F1P0H9|F1P0H9_CHICK	D.PSK(-1.03)AADFGPGPMGLMGPR.G	Y	23.4	1783.84	18	1.2	892.928	2	27.56		F16:550	2	81	98	Lysine oxidation to aminoadipic semialdehyde	K3:Lysine oxidation to aminoadipic semialdehyde:1000.00
Sample 2	1	1	Collagen alpha-2(I) chain OS=Gallus gallus GN=COL1A2 PE=4 SV=1	tr|F1P0H9|F1P0H9_CHICK	A.DFGPGPMGLMGPR.G	Y	36.71	1330.62	13	0.3	666.316	2	27.59		F16:551	2	86	98
Sample 2	1	1	Collagen alpha-2(I) chain OS=Gallus gallus GN=COL1A2 PE=4 SV=1	tr|F1P0H9|F1P0H9_CHICK	A.Q(-17.03)YDP(+15.99)SKAADFGPGPMGLMGPR.G	Y	23.23	2189.99	21	1.7	731.004	3	28.88		F16:578	2	78	98	Pyro-glu from Q; Oxidation or Hydroxylation	Q1:Pyro-glu from Q:1000.00;P4:Oxidation or Hydroxylation:14.04
Sample 2	9	7	Uncharacterized protein OS=Gallus gallus GN=AHSG PE=4 SV=1	tr|E1BZE1|E1BZE1_CHICK	K.NPDVYLM(+15.99)LLEIGR.A	Y	36.9	1547.8	13	0.6	774.909	2	32.72		F16:641	1	172	184	Oxidation (M)	M7:Oxidation (M):1000.00
