# Supplementary material for: Bone protein “extractomics”: comparing the efficiency of bone protein extractions of Gallus gallus in tandem mass spectrometry, with an eye towards paleoproteomics
Source: PeerJ. 2016 Oct 27;4:e2603. doi: 10.7717/peerj.2603 (PMC5088622; doi:10.7717/peerj.2603)
Supplement: Table S16 [file peerj-04-2603-s020.xlsx]

## Sheet: Peptides
Table S16. Peptides identified in samples from Method 2, dialyzed SDS (20 mL/g), post-HCl (20-H/SDS-D) @ 1% FDR
Sample #	Protein Group	Protein ID	Protein Description	Protein Accession	Peptide	Unique	-10lgP	Mass	Length	ppm	m/z	z	RT	Area	Scan	#Spec	Start	End	PTM	AScore
Sample 1	1	1	Collagen alpha-2(I) chain OS=Gallus gallus GN=COL1A2 PE=4 SV=1	tr|F1P0H9|F1P0H9_CHICK	K.GPNGDAGRP(+15.99)GEP(+15.99)GLM(+15.99)GPR.G	Y	33.69	1781.81	18	1.1	594.945	3	15		F10:115	1	432	449	Oxidation or Hydroxylation; Oxidation (M)	P9:Oxidation or Hydroxylation:33.98;P12:Oxidation or Hydroxylation:22.07;M15:Oxidation (M):1000.00
Sample 1	1	1	Collagen alpha-2(I) chain OS=Gallus gallus GN=COL1A2 PE=4 SV=1	tr|F1P0H9|F1P0H9_CHICK	R.GSNGEP(+15.99)GSAGPP(+15.99)GPAGLR.G	Y	33.16	1608.75	18	1.4	805.383	2	16.07		F10:123	1	381	398	Oxidation or Hydroxylation	P6:Oxidation or Hydroxylation:12.33;P12:Oxidation or Hydroxylation:11.06
Sample 1	1	1	Collagen alpha-2(I) chain OS=Gallus gallus GN=COL1A2 PE=4 SV=1	tr|F1P0H9|F1P0H9_CHICK	R.GDAGPP(+31.99)GMTGFP(+15.99)GAAGR.V	Y	28.55	1562.68	17	1.1	782.347	2	16.33		F10:126	1	777	793	Dihydroxy; Oxidation or Hydroxylation	P6:Dihydroxy:14.02;P12:Oxidation or Hydroxylation:10.19
Sample 1	2	4	Collagen alpha-1(I) chain OS=Gallus gallus GN=COL1A1 PE=1 SV=3	P02457|CO1A1_CHICK	R.GEP(+15.99)GPAGLP(+15.99)GPAGER.G	Y	34.1	1392.66	15	0.4	697.339	2	17.14		F10:133	1	462	476	Oxidation or Hydroxylation	P3:Oxidation or Hydroxylation:14.04;P9:Oxidation or Hydroxylation:17.01
Sample 1	1	1	Collagen alpha-2(I) chain OS=Gallus gallus GN=COL1A2 PE=4 SV=1	tr|F1P0H9|F1P0H9_CHICK	R.GAP(+15.99)GNPGPSGALGAP(+15.99)GPHGQVGPSGKP(+15.99)GNR.G	Y	30.19	2692.31	30	1.5	898.444	3	18.17		F10:142	1	948	977	Oxidation or Hydroxylation	P3:Oxidation or Hydroxylation:26.31;P15:Oxidation or Hydroxylation:0.00;P27:Oxidation or Hydroxylation:0.00
Sample 1	1	1	Collagen alpha-2(I) chain OS=Gallus gallus GN=COL1A2 PE=4 SV=1	tr|F1P0H9|F1P0H9_CHICK	R.GLRGDVGPVGR.T	Y	40.12	1081.6	11	0.5	541.807	2	18.6		F10:145	1	819	829
Sample 1	3	7	Uncharacterized protein OS=Gallus gallus GN=AHSG PE=4 SV=1	tr|E1BZE1|E1BZE1_CHICK	R.TFAEHAVEGDC(+57.02)DVK.L	Y	41.97	1576.68	14	1.1	789.35	2	19.27		F10:150	3	101	114	Carbamidomethylation	C11:Carbamidomethylation:1000.00
Sample 1	2	4	Collagen alpha-1(I) chain OS=Gallus gallus GN=COL1A1 PE=1 SV=3	P02457|CO1A1_CHICK	R.GLTGPIGPP(+15.99)GPAGAPGD(+15.99)KGEAGPP(+15.99)GPAGPTGAR.G	Y	50.1	2878.42	33	0.8	960.482	3	20.78		F10:161	1	753	785	Oxidation or Hydroxylation	P9:Oxidation or Hydroxylation:49.79;D17:Oxidation or Hydroxylation:16.36;P24:Oxidation or Hydroxylation:5.16
Sample 1	1	1	Collagen alpha-2(I) chain OS=Gallus gallus GN=COL1A2 PE=4 SV=1	tr|F1P0H9|F1P0H9_CHICK	K.GETGPAGPP(+15.99)GFQGLP(+15.99)GPSGPAGEAGKPGER(+15.99).G	Y	42.34	2776.31	30	1.4	926.444	3	21.68		F10:168	1	543	572	Oxidation or Hydroxylation	P9:Oxidation or Hydroxylation:14.02;P15:Oxidation or Hydroxylation:8.22;R30:Oxidation or Hydroxylation:8.26
Sample 1	2	4	Collagen alpha-1(I) chain OS=Gallus gallus GN=COL1A1 PE=1 SV=3	P02457|CO1A1_CHICK	K.DGLNGLP(+15.99)GPIGP(+15.99)PGPR(+15.99).G	Y	28.11	1560.79	16	0.7	781.403	2	21.79		F10:169	1	1142	1157	Oxidation or Hydroxylation	P7:Oxidation or Hydroxylation:16.36;P12:Oxidation or Hydroxylation:10.11;R16:Oxidation or Hydroxylation:0.00
Sample 1	1	1	Collagen alpha-2(I) chain OS=Gallus gallus GN=COL1A2 PE=4 SV=1	tr|F1P0H9|F1P0H9_CHICK	R.GLHGEFGVP(+15.99)GPAGPR.G	Y	40.85	1462.73	15	1.5	732.374	2	22.09		F10:171	1	573	587	Oxidation or Hydroxylation	P9:Oxidation or Hydroxylation:6.67
Sample 1	1	1	Collagen alpha-2(I) chain OS=Gallus gallus GN=COL1A2 PE=4 SV=1	tr|F1P0H9|F1P0H9_CHICK	K.GPKGETGPTGAIGPIGASGPP(+15.99)GPVGAAGPAGPR.G	Y	26.15	2820.45	33	1.3	941.159	3	23.13		F10:179	1	744	776	Oxidation or Hydroxylation	P21:Oxidation or Hydroxylation:17.01
Sample 1	1	1	Collagen alpha-2(I) chain OS=Gallus gallus GN=COL1A2 PE=4 SV=1	tr|F1P0H9|F1P0H9_CHICK	R.GDP(+15.99)GPVGPVGPAGAFGPR.G	Y	54.04	1619.81	18	0.8	810.911	2	24.12		F10:186	2	978	995	Oxidation or Hydroxylation	P3:Oxidation or Hydroxylation:10.11
Sample 1	3	7	Uncharacterized protein OS=Gallus gallus GN=AHSG PE=4 SV=1	tr|E1BZE1|E1BZE1_CHICK	K.VNGQFSVLASK.C	Y	27.35	1148.62	11	1	575.317	2	24.22		F10:187	1	118	128
Sample 1	1	1	Collagen alpha-2(I) chain OS=Gallus gallus GN=COL1A2 PE=4 SV=1	tr|F1P0H9|F1P0H9_CHICK	R.GAP(+15.99)GNPGPSGALGAP(+15.99)GPHGQVGPSGKPGN(+15.99)R.G	Y	25.47	2692.31	30	0.9	674.085	4	27.97		F10:213	1	948	977	Oxidation or Hydroxylation	P3:Oxidation or Hydroxylation:14.04;P15:Oxidation or Hydroxylation:4.64;N29:Oxidation or Hydroxylation:0.00
Sample 1	2	4	Collagen alpha-1(I) chain OS=Gallus gallus GN=COL1A1 PE=1 SV=3	P02457|CO1A1_CHICK	K.ALLLQGANEIEIR.A	Y	30.96	1438.81	13	1.3	720.415	2	29.4		F10:223	1	1376	1388
Sample 1	1	1	Collagen alpha-2(I) chain OS=Gallus gallus GN=COL1A2 PE=4 SV=1	tr|F1P0H9|F1P0H9_CHICK	R.GASGPVGAKGPNGDAGR(+15.99)PGEP(+31.99)GLMGPR.G	Y	31.67	2506.2	27	0.1	627.557	4	30.83		F10:233	1	423	449	Oxidation or Hydroxylation; Dihydroxy	R17:Oxidation or Hydroxylation:0.00;P21:Dihydroxy:0.00
Sample 1	2	4	Collagen alpha-1(I) chain OS=Gallus gallus GN=COL1A1 PE=1 SV=3	P02457|CO1A1_CHICK	R.GLP(+15.99)GPP(+15.99)GAP(+15.99)GPQGF.Q	Y	30.12	1295.61	14	0.8	648.815	2	33.09		F10:249	1	177	190	Oxidation or Hydroxylation	P3:Oxidation or Hydroxylation:26.31;P6:Oxidation or Hydroxylation:33.98;P9:Oxidation or Hydroxylation:36.05
Sample 1	3	7	Uncharacterized protein OS=Gallus gallus GN=AHSG PE=4 SV=1	tr|E1BZE1|E1BZE1_CHICK	K.VN(-17.03)GQFSVLASK.C	Y	45.73	1131.59	11	0.6	566.804	2	38.42		F10:287	1	118	128	Ammonia-loss (N)	N2:Ammonia-loss (N):1000.00
Sample 1	1	1	Collagen alpha-2(I) chain OS=Gallus gallus GN=COL1A2 PE=4 SV=1	tr|F1P0H9|F1P0H9_CHICK	R.VGP(+15.99)P(+15.99)GPAGITGPP(+15.99)GPP(+15.99)GPAGK.D	Y	45.37	1840.93	21	1.6	921.475	2	43.29		F10:330	1	794	814	Oxidation or Hydroxylation	P3:Oxidation or Hydroxylation:16.66;P4:Oxidation or Hydroxylation:4.64;P13:Oxidation or Hydroxylation:27.96;P16:Oxidation or Hydroxylation:27.96
Sample 1	1	1	Collagen alpha-2(I) chain OS=Gallus gallus GN=COL1A2 PE=4 SV=1	tr|F1P0H9|F1P0H9_CHICK	R.GLP(+15.99)GESGAVGPAGPIGSR.G	Y	40.42	1593.81	18	1.6	797.914	2	44.18		F10:339	1	591	608	Oxidation or Hydroxylation	P3:Oxidation or Hydroxylation:112.87
Sample 1	2	4	Collagen alpha-1(I) chain OS=Gallus gallus GN=COL1A1 PE=1 SV=3	P02457|CO1A1_CHICK	R.GLTGPIGPP(+15.99)GPAGAPGD(+15.99)KGEAGP(+15.99)PGPAGPTGAR.G	Y	38.21	2878.42	33	4.8	960.486	3	47.25		F10:366	1	753	785	Oxidation or Hydroxylation	P9:Oxidation or Hydroxylation:10.11;D17:Oxidation or Hydroxylation:0.00;P23:Oxidation or Hydroxylation:0.00
Sample 1	1	1	Collagen alpha-2(I) chain OS=Gallus gallus GN=COL1A2 PE=4 SV=1	tr|F1P0H9|F1P0H9_CHICK	R.VGPIGPAGNRGEP(+15.99)GNIGFP(+15.99)GPK.G	Y	38.43	2119.08	22	0.8	707.368	3	48.28		F10:373	1	476	497	Oxidation or Hydroxylation	P13:Oxidation or Hydroxylation:0.00;P19:Oxidation or Hydroxylation:0.00
Sample 1	1	1	Collagen alpha-2(I) chain OS=Gallus gallus GN=COL1A2 PE=4 SV=1	tr|F1P0H9|F1P0H9_CHICK	R.VGPIGPAGNRGEP(+15.99)GNIGFPGPK(+15.99).G	Y	28.35	2119.08	22	1.2	707.369	3	12.54		F10:97	2	476	497	Oxidation or Hydroxylation	P13:Oxidation or Hydroxylation:5.99;K22:Oxidation or Hydroxylation:0.00
Sample 2	2	4	Collagen alpha-1(I) chain OS=Gallus gallus GN=COL1A1 PE=1 SV=3	P02457|CO1A1_CHICK	R.GSAGPP(+15.99)GATGFP(+15.99)GAAGR.V	Y	62.62	1458.69	17	0.8	730.35	2	15.18		F9:144	4	855	871	Oxidation or Hydroxylation	P6:Oxidation or Hydroxylation:11.06;P12:Oxidation or Hydroxylation:40.00
Sample 2	6	2181	Uncharacterized protein OS=Gallus gallus GN=LECT2 PE=4 SV=2	tr|F1NEF7|F1NEF7_CHICK	K.LVC(+57.02)IHPIR.Y	Y	45.92	1006.57	8	0.2	504.295	2	17.27		F9:160	1	116	123	Carbamidomethylation	C3:Carbamidomethylation:1000.00
Sample 2	6	2182	Myeloid protein 1 OS=Gallus gallus GN=MIM1 PE=1 SV=2	P08940|MIM1_CHICK	K.LVC(+57.02)IHPIR.Y	Y	45.92	1006.57	8	0.2	504.295	2	17.27		F9:160	1	116	123	Carbamidomethylation	C3:Carbamidomethylation:1000.00
Sample 2	1	1	Collagen alpha-2(I) chain OS=Gallus gallus GN=COL1A2 PE=4 SV=1	tr|F1P0H9|F1P0H9_CHICK	K.EGPVGFP(+15.99)GADGR.V	Y	46.2	1173.54	12	0.6	587.778	2	17.43		F9:161	2	464	475	Oxidation or Hydroxylation	P7:Oxidation or Hydroxylation:17.01
Sample 2	1	1	Collagen alpha-2(I) chain OS=Gallus gallus GN=COL1A2 PE=4 SV=1	tr|F1P0H9|F1P0H9_CHICK	R.GLP(+15.99)GIAGAT.G	Y	31.2	771.413	9	1.3	772.421	1	35.52		F9:286	1	882	890	Oxidation or Hydroxylation	P3:Oxidation or Hydroxylation:1000.00
Sample 2	1	1	Collagen alpha-2(I) chain OS=Gallus gallus GN=COL1A2 PE=4 SV=1	tr|F1P0H9|F1P0H9_CHICK	R.GAP(+15.99)GPEGNNGAQGPP(+15.99)GVTGNQGAK.G	Y	31.49	2162.99	24	0.8	1082.51	2	41.04		F9:326	1	519	542	Oxidation or Hydroxylation	P3:Oxidation or Hydroxylation:26.31;P15:Oxidation or Hydroxylation:14.02
Sample 2	1	1	Collagen alpha-2(I) chain OS=Gallus gallus GN=COL1A2 PE=4 SV=1	tr|F1P0H9|F1P0H9_CHICK	R.GDAGPP(+15.99)GM(+15.99)TGFP(+15.99)GAAGR.V	Y	53.9	1562.68	17	1.1	782.347	2	42.8		F9:342	1	777	793	Oxidation or Hydroxylation; Oxidation (M)	P6:Oxidation or Hydroxylation:14.02;M8:Oxidation (M):1000.00;P12:Oxidation or Hydroxylation:40.00
Sample 2	1	1	Collagen alpha-2(I) chain OS=Gallus gallus GN=COL1A2 PE=4 SV=1	tr|F1P0H9|F1P0H9_CHICK	G.PSGEEGKRGA(sub S)NGEPGSAGPP(+15.99)GPAGLR.G	Y	25.41	2417.17	26	6.3	806.735	3	42.92		F9:345	1	373	398	Oxidation or Hydroxylation; Mutation	P20:Oxidation or Hydroxylation:17.01
Sample 2	2	4	Collagen alpha-1(I) chain OS=Gallus gallus GN=COL1A1 PE=1 SV=3	P02457|CO1A1_CHICK	K.GLTGSP(+15.99)GSP(+15.99)GPDGK.T	Y	28.66	1257.58	14	1.1	629.8	2	43.39		F9:352	1	528	541	Oxidation or Hydroxylation	P6:Oxidation or Hydroxylation:119.54;P9:Oxidation or Hydroxylation:45.01
Sample 2	2	4	Collagen alpha-1(I) chain OS=Gallus gallus GN=COL1A1 PE=1 SV=3	P02457|CO1A1_CHICK	R.GVQGPP(+15.99)GPQGPR.G	Y	58.86	1161.59	12	0.5	581.802	2	43.84		F9:358	1	675	686	Oxidation or Hydroxylation	P6:Oxidation or Hydroxylation:14.02
