# Supplementary material for: Bone protein “extractomics”: comparing the efficiency of bone protein extractions of Gallus gallus in tandem mass spectrometry, with an eye towards paleoproteomics
Source: PeerJ. 2016 Oct 27;4:e2603. doi: 10.7717/peerj.2603 (PMC5088622; doi:10.7717/peerj.2603)
Supplement: Table S17 [file peerj-04-2603-s021.xlsx]

## Sheet: Peptides
Table S17. Peptides identified in samples from Method 2, precipitated SDS (20 mL/g), post-HCl (20-H/SDS-P) 1% FDR
Sample #	Protein Group	Protein ID	Protein Description	Protein Accession	Peptide	Unique	-10lgP	Mass	Length	ppm	m/z	z	RT	Area	Scan	#Spec	Start	End	PTM	AScore
Sample 1	1	1	Collagen alpha-2(I) chain OS=Gallus gallus GN=COL1A2 PE=4 SV=1	tr|F1P0H9|F1P0H9_CHICK	R.GAP(+15.99)GNPGPSGALGAPGP(+15.99)HGQVGPSGKP(+15.99)GNR.G	Y	21.17	2692.31	30	0.9	674.085	4	13.97		F11:112	1	948	977	Oxidation or Hydroxylation	P3:Oxidation or Hydroxylation:14.04;P17:Oxidation or Hydroxylation:0.00;P27:Oxidation or Hydroxylation:0.00
Sample 1	1	1	Collagen alpha-2(I) chain OS=Gallus gallus GN=COL1A2 PE=4 SV=1	tr|F1P0H9|F1P0H9_CHICK	R.GAP(+15.99)GNPGPSGALGAP(+15.99)GPHGQVGPSGKPGN(+15.99)R.G	Y	41.77	2692.31	30	1.4	898.444	3	14		F11:113	1	948	977	Oxidation or Hydroxylation	P3:Oxidation or Hydroxylation:22.85;P15:Oxidation or Hydroxylation:0.00;N29:Oxidation or Hydroxylation:0.00
Sample 1	2	4	Collagen alpha-1(I) chain OS=Gallus gallus GN=COL1A1 PE=1 SV=3	P02457|CO1A1_CHICK	L.QGPP(+15.99)GPP(+15.99)GAP(+15.99)GEQGPSGASGPAGPR.G	Y	26.21	2227.03	25	0.8	743.35	3	14.11		F11:117	1	1106	1130	Oxidation or Hydroxylation	P4:Oxidation or Hydroxylation:0.00;P7:Oxidation or Hydroxylation:33.98;P10:Oxidation or Hydroxylation:67.69
Sample 1	2	4	Collagen alpha-1(I) chain OS=Gallus gallus GN=COL1A1 PE=1 SV=3	P02457|CO1A1_CHICK	L.QGPP(+15.99)GP(+15.99)PGAP(+15.99)GEQGPSGASGPAGPR.G	Y	19.78	2227.03	25	2.1	1114.52	2	14.15		F11:118	1	1106	1130	Oxidation or Hydroxylation	P4:Oxidation or Hydroxylation:11.06;P6:Oxidation or Hydroxylation:0.00;P10:Oxidation or Hydroxylation:14.84
Sample 1	1	1	Collagen alpha-2(I) chain OS=Gallus gallus GN=COL1A2 PE=4 SV=1	tr|F1P0H9|F1P0H9_CHICK	R.GAP(+15.99)GNPGPSGALGAPGP(+15.99)HGQVGPSGKPGN(+15.99)R.G	Y	21.02	2692.31	30	0.8	674.084	4	14.31		F11:122	1	948	977	Oxidation or Hydroxylation	P3:Oxidation or Hydroxylation:14.04;P17:Oxidation or Hydroxylation:4.64;N29:Oxidation or Hydroxylation:0.00
Sample 1	2	4	Collagen alpha-1(I) chain OS=Gallus gallus GN=COL1A1 PE=1 SV=3	P02457|CO1A1_CHICK	R.DGAAGPKGDRGETGPAGP(+15.99)PGAP(+15.99)GAPGAP(+15.99)GPVGPAGK.N	Y	17.15	3092.49	36	1.2	774.131	4	14.36		F11:124	1	1016	1051	Oxidation or Hydroxylation	P18:Oxidation or Hydroxylation:0.00;P22:Oxidation or Hydroxylation:28.36;P28:Oxidation or Hydroxylation:14.04
Sample 1	2	4	Collagen alpha-1(I) chain OS=Gallus gallus GN=COL1A1 PE=1 SV=3	P02457|CO1A1_CHICK	R.GAP(+15.99)GPP(+15.99)GAVGAAGKDGEAGAQGPP(+15.99)GPTGPAGER.G	Y	45.23	2855.34	33	1.1	952.789	3	14.76		F11:131	2	588	620	Oxidation or Hydroxylation	P3:Oxidation or Hydroxylation:32.28;P6:Oxidation or Hydroxylation:17.01;P24:Oxidation or Hydroxylation:91.48
Sample 1	2	4	Collagen alpha-1(I) chain OS=Gallus gallus GN=COL1A1 PE=1 SV=3	P02457|CO1A1_CHICK	K.GDRGETGPAGP(+15.99)PGAPGAP(+15.99)GAP(+15.99)GPVGPAGK.N	Y	25.56	2496.2	29	1.2	833.075	3	14.79		F11:132	1	1023	1051	Oxidation or Hydroxylation	P11:Oxidation or Hydroxylation:0.00;P18:Oxidation or Hydroxylation:0.00;P21:Oxidation or Hydroxylation:14.04
Sample 1	2	4	Collagen alpha-1(I) chain OS=Gallus gallus GN=COL1A1 PE=1 SV=3	P02457|CO1A1_CHICK	K.GEP(+15.99)GPAGVQGPP(+15.99)GPAGEEGK.R	Y	36.45	1818.84	20	1.5	910.428	2	14.88		F11:135	1	438	457	Oxidation or Hydroxylation	P3:Oxidation or Hydroxylation:14.04;P12:Oxidation or Hydroxylation:12.28
Sample 1	1	1	Collagen alpha-2(I) chain OS=Gallus gallus GN=COL1A2 PE=4 SV=1	tr|F1P0H9|F1P0H9_CHICK	R.GIP(+15.99)GERGEP(+15.99)GPVGPS.G	Y	18.1	1436.69	15	0.7	719.352	2	15.43		F11:148	1	708	722	Oxidation or Hydroxylation	P3:Oxidation or Hydroxylation:0.00;P9:Oxidation or Hydroxylation:26.31
Sample 1	1	1	Collagen alpha-2(I) chain OS=Gallus gallus GN=COL1A2 PE=4 SV=1	tr|F1P0H9|F1P0H9_CHICK	R.GDAGPP(+15.99)GM(+15.99)TGFP(+15.99)GAAGR.V	Y	45.44	1562.68	17	1.1	782.347	2	15.53		F11:151	1	777	793	Oxidation or Hydroxylation; Oxidation (M)	P6:Oxidation or Hydroxylation:12.28;M8:Oxidation (M):1000.00;P12:Oxidation or Hydroxylation:30.46
Sample 1	2	4	Collagen alpha-1(I) chain OS=Gallus gallus GN=COL1A1 PE=1 SV=3	P02457|CO1A1_CHICK	R.GSAGPP(+15.99)GATGFP(+15.99)GAAGR.V	Y	55.26	1458.69	17	0.9	730.351	2	15.76		F11:157	3	855	871	Oxidation or Hydroxylation	P6:Oxidation or Hydroxylation:27.96;P12:Oxidation or Hydroxylation:17.91
Sample 1	2	4	Collagen alpha-1(I) chain OS=Gallus gallus GN=COL1A1 PE=1 SV=3	P02457|CO1A1_CHICK	R.GEP(+15.99)GPAGLP(+15.99)GPAGER.G	Y	43.22	1392.66	15	0.4	697.339	2	16.05		F11:166	4	462	476	Oxidation or Hydroxylation	P3:Oxidation or Hydroxylation:17.01;P9:Oxidation or Hydroxylation:17.01
Sample 1	2	4	Collagen alpha-1(I) chain OS=Gallus gallus GN=COL1A1 PE=1 SV=3	P02457|CO1A1_CHICK	R.GQAGVM(+15.99)GFP(+15.99)GPK.G	Y	54.37	1176.56	12	0.5	589.287	2	16.74		F11:188	1	564	575	Oxidation (M); Oxidation or Hydroxylation	M6:Oxidation (M):1000.00;P9:Oxidation or Hydroxylation:5.03
Sample 1	1	1	Collagen alpha-2(I) chain OS=Gallus gallus GN=COL1A2 PE=4 SV=1	tr|F1P0H9|F1P0H9_CHICK	R.M(sub V)GPPGPAGITGPP(+15.99)GP(+15.99)PGPAGK.D	Y	12.81	1840.91	21	10.4	614.652	3	17.02		F11:196	1	794	814	Oxidation or Hydroxylation; Mutation	P13:Oxidation or Hydroxylation:14.02;P15:Oxidation or Hydroxylation:0.00
Sample 1	1	1	Collagen alpha-2(I) chain OS=Gallus gallus GN=COL1A2 PE=4 SV=1	tr|F1P0H9|F1P0H9_CHICK	R.GLP(+15.99)GAIGAP(+15.99)GPAGGAGDR.G	Y	19	1521.75	18	0.8	761.885	2	17.08		F11:198	1	675	692	Oxidation or Hydroxylation	P3:Oxidation or Hydroxylation:78.75;P9:Oxidation or Hydroxylation:0.00
Sample 1	1	1	Collagen alpha-2(I) chain OS=Gallus gallus GN=COL1A2 PE=4 SV=1	tr|F1P0H9|F1P0H9_CHICK	R.GLP(+15.99)GAIGAP(+15.99)GPAGGAGDRGEGGPAGPAGPAGAR.G	Y	38.81	2724.33	33	1.2	909.119	3	17.3		F11:203	4	675	707	Oxidation or Hydroxylation	P3:Oxidation or Hydroxylation:99.62;P9:Oxidation or Hydroxylation:22.85
Sample 1	1	1	Collagen alpha-2(I) chain OS=Gallus gallus GN=COL1A2 PE=4 SV=1	tr|F1P0H9|F1P0H9_CHICK	R.GLHGEFGVP(+15.99)GPAGPRGER.G	Y	40.26	1804.9	18	0.7	602.64	3	17.46		F11:208	1	573	590	Oxidation or Hydroxylation	P9:Oxidation or Hydroxylation:9.40
Sample 1	2	4	Collagen alpha-1(I) chain OS=Gallus gallus GN=COL1A1 PE=1 SV=3	P02457|CO1A1_CHICK	R.GFP(+15.99)GADGIAGPKGPPGER(+15.99).G	Y	57.51	1710.83	18	1.1	856.424	2	17.62		F11:213	1	483	500	Oxidation or Hydroxylation	P3:Oxidation or Hydroxylation:9.34;R18:Oxidation or Hydroxylation:3.64
Sample 1	1	1	Collagen alpha-2(I) chain OS=Gallus gallus GN=COL1A2 PE=4 SV=1	tr|F1P0H9|F1P0H9_CHICK	T.GEP(+15.99)GPLGVSGPP(+15.99)GAR.G	Y	36.46	1378.68	15	0.5	690.35	2	17.7		F11:216	2	891	905	Oxidation or Hydroxylation	P3:Oxidation or Hydroxylation:11.10;P12:Oxidation or Hydroxylation:0.00
Sample 1	3	6	Apolipoprotein A-I OS=Gallus gallus GN=APOA1 PE=1 SV=2	P08250|APOA1_CHICK	R.AELTKDLEEVKEK.I	Y	54.96	1530.81	13	1.3	766.415	2	17.77		F11:218	3	107	119
Sample 1	2	4	Collagen alpha-1(I) chain OS=Gallus gallus GN=COL1A1 PE=1 SV=3	P02457|CO1A1_CHICK	K.GSPGAD(+15.99)GPIGAP(+15.99)GTP(+15.99)GPQGIAGQR.G	Y	39.51	2162.04	24	1.3	1082.03	2	17.84		F11:220	2	924	947	Oxidation or Hydroxylation	D6:Oxidation or Hydroxylation:5.08;P12:Oxidation or Hydroxylation:67.69;P15:Oxidation or Hydroxylation:17.01
Sample 1	1	1	Collagen alpha-2(I) chain OS=Gallus gallus GN=COL1A2 PE=4 SV=1	tr|F1P0H9|F1P0H9_CHICK	K.EGPVGFP(+15.99)GADGR.V	Y	43.11	1173.54	12	0.6	587.778	2	18.15		F11:229	3	464	475	Oxidation or Hydroxylation	P7:Oxidation or Hydroxylation:8.69
Sample 1	2	4	Collagen alpha-1(I) chain OS=Gallus gallus GN=COL1A1 PE=1 SV=3	P02457|CO1A1_CHICK	R.GLTGPIGPPGPAGAPGD(+21.98)K(+42.01)GEAGPPGPAGPTGAR.G	Y	27.6	2894.43	33	-2.9	965.814	3	18.26		F11:233	1	753	785	Sodium adduct; Acetylation (K)	D17:Sodium adduct:0.00;K18:Acetylation (K):1000.00
Sample 1	2	4	Collagen alpha-1(I) chain OS=Gallus gallus GN=COL1A1 PE=1 SV=3	P02457|CO1A1_CHICK	K.GATGAP(+15.99)GIAGAP(+15.99)GFP(+15.99)GAR.G	Y	44.43	1571.77	18	1.4	786.893	2	18.43		F11:238	3	387	404	Oxidation or Hydroxylation	P6:Oxidation or Hydroxylation:98.53;P12:Oxidation or Hydroxylation:20.41;P15:Oxidation or Hydroxylation:0.00
Sample 1	2	4	Collagen alpha-1(I) chain OS=Gallus gallus GN=COL1A1 PE=1 SV=3	P02457|CO1A1_CHICK	R.GLTGPIGPP(+15.99)GPAGAP(+15.99)GDKGEAGPP(+15.99)GPAGPTGAR.G	Y	59.93	2878.42	33	1.6	960.482	3	18.45		F11:239	4	753	785	Oxidation or Hydroxylation	P9:Oxidation or Hydroxylation:42.89;P15:Oxidation or Hydroxylation:51.59;P24:Oxidation or Hydroxylation:56.47
Sample 1	2	4	Collagen alpha-1(I) chain OS=Gallus gallus GN=COL1A1 PE=1 SV=3	P02457|CO1A1_CHICK	R.GPP(+15.99)GPMGPP(+15.99)GLAGP(+15.99)PGEAGR.E	Y	45.5	1815.86	20	1.5	908.937	2	18.56		F11:242	1	984	1003	Oxidation or Hydroxylation	P3:Oxidation or Hydroxylation:12.28;P9:Oxidation or Hydroxylation:12.28;P14:Oxidation or Hydroxylation:0.00
Sample 1	1	1	Collagen alpha-2(I) chain OS=Gallus gallus GN=COL1A2 PE=4 SV=1	tr|F1P0H9|F1P0H9_CHICK	R.GLHGEFGVP(+15.99)GPAGPR.G	Y	52.2	1462.73	15	1.2	732.374	2	18.75		F11:248	6	573	587	Oxidation or Hydroxylation	P9:Oxidation or Hydroxylation:22.85
Sample 1	1	1	Collagen alpha-2(I) chain OS=Gallus gallus GN=COL1A2 PE=4 SV=1	tr|F1P0H9|F1P0H9_CHICK	R.TGEQGIAGPP(+15.99)GFAGEK.G	Y	42.63	1530.73	16	1.2	766.374	2	18.85		F11:252	2	830	845	Oxidation or Hydroxylation	P10:Oxidation or Hydroxylation:6.59
Sample 1	2	4	Collagen alpha-1(I) chain OS=Gallus gallus GN=COL1A1 PE=1 SV=3	P02457|CO1A1_CHICK	R.GPP(+15.99)GPMGPP(+15.99)GLAGPPGEAGR(+15.99).E	Y	44.69	1815.86	20	1.5	908.937	2	18.88		F11:253	1	984	1003	Oxidation or Hydroxylation	P3:Oxidation or Hydroxylation:17.01;P9:Oxidation or Hydroxylation:30.46;R20:Oxidation or Hydroxylation:0.00
Sample 1	2	4	Collagen alpha-1(I) chain OS=Gallus gallus GN=COL1A1 PE=1 SV=3	P02457|CO1A1_CHICK	R.GFP(+15.99)GADGIAGPK.G	Y	49.22	1101.55	12	0.9	551.78	2	19.03		F11:257	4	483	494	Oxidation or Hydroxylation	P3:Oxidation or Hydroxylation:11.06
Sample 1	1	1	Collagen alpha-2(I) chain OS=Gallus gallus GN=COL1A2 PE=4 SV=1	tr|F1P0H9|F1P0H9_CHICK	R.GLHGEFGVPGPAGP(+15.99)R.G	Y	38.59	1462.73	15	1.2	732.374	2	19.08		F11:259	1	573	587	Oxidation or Hydroxylation	P14:Oxidation or Hydroxylation:0.00
Sample 1	11	20	Vitronectin OS=Gallus gallus PE=2 SV=1	tr|O12945|O12945_CHICK	K.TYLFKGSQ(+.98)YWR(+14.02).F	Y	12.26	1462.72	11	5	488.584	3	19.14		F11:261	1	217	227	Deamidation (NQ); Methyl ester	Q8:Deamidation (NQ):1000.00;R11:Methyl ester:1000.00
Sample 1	11	21	Uncharacterized protein OS=Gallus gallus GN=VTN PE=4 SV=2	tr|E1C7A7|E1C7A7_CHICK	K.TYLFKGSQ(+.98)YWR(+14.02).F	Y	12.26	1462.72	11	5	488.584	3	19.14		F11:261	1	217	227	Deamidation (NQ); Methyl ester	Q8:Deamidation (NQ):1000.00;R11:Methyl ester:1000.00
Sample 1	1	1	Collagen alpha-2(I) chain OS=Gallus gallus GN=COL1A2 PE=4 SV=1	tr|F1P0H9|F1P0H9_CHICK	R.GLP(+15.99)GESGAVGPAGPIGSR.G	Y	54.78	1593.81	18	0.2	797.913	2	19.17		F11:262	4	591	608	Oxidation or Hydroxylation	P3:Oxidation or Hydroxylation:132.11
Sample 1	7	2	Serum albumin OS=Gallus gallus GN=ALB PE=4 SV=2	tr|F2Z4L6|F2Z4L6_CHICK	K.LVKDVVDLAQK.C	N	45.71	1226.72	11	0.6	614.369	2	19.6		F11:276	2	19	29
Sample 1	6	3	Serum albumin OS=Gallus gallus GN=ALB PE=1 SV=2	P19121|ALBU_CHICK	K.LVKDVVDLAQK.C	N	45.71	1226.72	11	0.6	614.369	2	19.6		F11:276	2	69	79
Sample 1	10	10	Decorin OS=Gallus gallus GN=DCN PE=1 SV=1	P28675|PGS2_CHICK	R.ELHLNNNELVR.V	Y	35.67	1349.71	11	1.2	675.861	2	19.66		F11:278	1	271	281
Sample 1	10	11	Decorin OS=Gallus gallus GN=DCN PE=4 SV=2	tr|E1BRE9|E1BRE9_CHICK	R.ELHLNNNELVR.V	Y	35.67	1349.71	11	1.2	675.861	2	19.66		F11:278	1	271	281
Sample 1	2	4	Collagen alpha-1(I) chain OS=Gallus gallus GN=COL1A1 PE=1 SV=3	P02457|CO1A1_CHICK	R.GFP(+15.99)GLP(+15.99)GPSGEPGK(+15.99).Q	Y	34.93	1343.64	14	1.3	672.826	2	19.95		F11:286	2	960	973	Oxidation or Hydroxylation	P3:Oxidation or Hydroxylation:17.01;P6:Oxidation or Hydroxylation:14.04;K14:Oxidation or Hydroxylation:0.00
Sample 1	1	1	Collagen alpha-2(I) chain OS=Gallus gallus GN=COL1A2 PE=4 SV=1	tr|F1P0H9|F1P0H9_CHICK	R.NGLP(+15.99)GPIGPAGVR.G	Y	36.19	1219.67	13	1.1	610.842	2	20.17		F11:292	4	1067	1079	Oxidation or Hydroxylation	P4:Oxidation or Hydroxylation:20.41
Sample 1	2	4	Collagen alpha-1(I) chain OS=Gallus gallus GN=COL1A1 PE=1 SV=3	P02457|CO1A1_CHICK	R.GFSGLQGPPGP(+15.99)P(+15.99)GAP(+15.99)GEQGPSGASGPAGPR.G	Y	13.15	2688.25	30	1.9	897.093	3	20.24		F11:295	1	1101	1130	Oxidation or Hydroxylation	P11:Oxidation or Hydroxylation:9.42;P12:Oxidation or Hydroxylation:12.42;P15:Oxidation or Hydroxylation:23.70
Sample 1	1	1	Collagen alpha-2(I) chain OS=Gallus gallus GN=COL1A2 PE=4 SV=1	tr|F1P0H9|F1P0H9_CHICK	K.GAAGLP(+15.99)GVAGAP(+15.99)GLPGPR(+15.99).G	Y	41.72	1561.82	18	1.4	781.919	2	20.32		F11:297	2	309	326	Oxidation or Hydroxylation	P6:Oxidation or Hydroxylation:106.84;P12:Oxidation or Hydroxylation:40.63;R18:Oxidation or Hydroxylation:0.00
Sample 1	1	1	Collagen alpha-2(I) chain OS=Gallus gallus GN=COL1A2 PE=4 SV=1	tr|F1P0H9|F1P0H9_CHICK	R.VGPIGPAGNRGEP(+15.99)GNIGFPGP(+15.99)K.G	Y	36.24	2119.08	22	1	707.368	3	20.46		F11:301	2	476	497	Oxidation or Hydroxylation	P13:Oxidation or Hydroxylation:7.32;P21:Oxidation or Hydroxylation:0.00
Sample 1	1	1	Collagen alpha-2(I) chain OS=Gallus gallus GN=COL1A2 PE=4 SV=1	tr|F1P0H9|F1P0H9_CHICK	K.GP(+15.99)KGETGPTGAIGPIGASGPP(+15.99)GPVGAAGPAGPR.G	Y	48.88	2836.45	33	1.4	946.491	3	20.58		F11:305	1	744	776	Oxidation or Hydroxylation	P2:Oxidation or Hydroxylation:0.00;P21:Oxidation or Hydroxylation:63.64
Sample 1	2	4	Collagen alpha-1(I) chain OS=Gallus gallus GN=COL1A1 PE=1 SV=3	P02457|CO1A1_CHICK	R.GFP(+15.99)GLP(+15.99)GPSGEPGK.Q	Y	29.36	1327.64	14	0.8	664.828	2	20.66		F11:308	4	960	973	Oxidation or Hydroxylation	P3:Oxidation or Hydroxylation:17.01;P6:Oxidation or Hydroxylation:14.04
Sample 1	1	1	Collagen alpha-2(I) chain OS=Gallus gallus GN=COL1A2 PE=4 SV=1	tr|F1P0H9|F1P0H9_CHICK	K.GPKGETGPTGAIGPIGASGPP(+15.99)GPVGAAGPAGPR.G	Y	49.16	2820.45	33	0.9	941.159	3	20.75		F11:311	3	744	776	Oxidation or Hydroxylation	P21:Oxidation or Hydroxylation:49.96
Sample 1	2	4	Collagen alpha-1(I) chain OS=Gallus gallus GN=COL1A1 PE=1 SV=3	P02457|CO1A1_CHICK	R.GQAGVMGFPGPK(+15.99).G	Y	47.58	1160.56	12	0.7	581.29	2	20.92		F11:316	2	564	575	Oxidation or Hydroxylation	K12:Oxidation or Hydroxylation:0.00
Sample 1	2	4	Collagen alpha-1(I) chain OS=Gallus gallus GN=COL1A1 PE=1 SV=3	P02457|CO1A1_CHICK	R.GQAGVMGFP(+15.99)GPK.G	Y	41.13	1160.56	12	0.7	581.29	2	21.04		F11:320	1	564	575	Oxidation or Hydroxylation	P9:Oxidation or Hydroxylation:0.00
Sample 1	2	4	Collagen alpha-1(I) chain OS=Gallus gallus GN=COL1A1 PE=1 SV=3	P02457|CO1A1_CHICK	K.DGLNGLP(+15.99)GPIGPP(+15.99)GP(+15.99)R.G	Y	27.61	1560.79	16	0.8	781.403	2	21.31		F11:328	1	1142	1157	Oxidation or Hydroxylation	P7:Oxidation or Hydroxylation:26.31;P13:Oxidation or Hydroxylation:0.00;P15:Oxidation or Hydroxylation:0.00
Sample 1	9	7877	Hemoglobin subunit beta OS=Gallus gallus GN=HBB PE=1 SV=2	P02112|HBB_CHICK	K.VNVAEC(+57.02)GAEALAR.L	Y	54.85	1358.66	13	0.5	680.338	2	21.37		F11:330	1	19	31	Carbamidomethylation	C6:Carbamidomethylation:1000.00
Sample 1	2	4	Collagen alpha-1(I) chain OS=Gallus gallus GN=COL1A1 PE=1 SV=3	P02457|CO1A1_CHICK	K.DGLNGLP(+15.99)GPIGPP(+15.99)GPR(+15.99).G	Y	16.08	1560.79	16	0.8	781.403	2	21.59		F11:337	1	1142	1157	Oxidation or Hydroxylation	P7:Oxidation or Hydroxylation:16.36;P13:Oxidation or Hydroxylation:0.00;R16:Oxidation or Hydroxylation:0.00
Sample 1	4	8	SPARC OS=Gallus gallus GN=SPARC PE=4 SV=1	tr|F1P291|F1P291_CHICK	R.LEAGDHTVELLAR.D	Y	47.02	1422.75	13	1.2	712.381	2	21.61		F11:338	4	201	213
Sample 1	4	9	SPARC OS=Gallus gallus GN=SPARC PE=2 SV=1	P36377|SPRC_CHICK	R.LEAGDHTVELLAR.D	Y	47.02	1422.75	13	1.2	712.381	2	21.61		F11:338	4	201	213
Sample 1	1	1	Collagen alpha-2(I) chain OS=Gallus gallus GN=COL1A2 PE=4 SV=1	tr|F1P0H9|F1P0H9_CHICK	R.N(+.98)GLP(+15.99)GPIGPAGVR.G	Y	45.23	1220.65	13	0.7	611.333	2	21.9		F11:346	2	1067	1079	Deamidation (NQ); Oxidation or Hydroxylation	N1:Deamidation (NQ):1000.00;P4:Oxidation or Hydroxylation:52.04
Sample 1	11	20	Vitronectin OS=Gallus gallus PE=2 SV=1	tr|O12945|O12945_CHICK	R.GVPNQLDAAMAGR.I	Y	35.08	1298.64	13	0.5	650.328	2	21.93		F11:347	1	338	350
Sample 1	11	21	Uncharacterized protein OS=Gallus gallus GN=VTN PE=4 SV=2	tr|E1C7A7|E1C7A7_CHICK	R.GVPNQLDAAMAGR.I	Y	35.08	1298.64	13	0.5	650.328	2	21.93		F11:347	1	338	350
Sample 1	5	7	Uncharacterized protein OS=Gallus gallus GN=AHSG PE=4 SV=1	tr|E1BZE1|E1BZE1_CHICK	R.AAAEVAQHDKVPHPVGFVPPPPLC(+57.02)PGK.I	Y	23.4	2814.46	27	0.8	704.624	4	21.96		F11:348	4	312	338	Carbamidomethylation	C24:Carbamidomethylation:1000.00
Sample 1	12	2181	Uncharacterized protein OS=Gallus gallus GN=LECT2 PE=4 SV=2	tr|F1NEF7|F1NEF7_CHICK	K.FFHNGNAIDDGVQIR.G	Y	52.06	1701.82	15	0.3	851.919	2	22.01		F11:350	3	244	258
Sample 1	12	2182	Myeloid protein 1 OS=Gallus gallus GN=MIM1 PE=1 SV=2	P08940|MIM1_CHICK	K.FFHNGNAIDDGVQIR.G	Y	52.06	1701.82	15	0.3	851.919	2	22.01		F11:350	3	244	258
Sample 1	3	6	Apolipoprotein A-I OS=Gallus gallus GN=APOA1 PE=1 SV=2	P08250|APOA1_CHICK	K.WTEELEQYR.Q	Y	45.81	1252.57	9	0.7	627.294	2	22.13		F11:353	3	131	139
Sample 1	5	7	Uncharacterized protein OS=Gallus gallus GN=AHSG PE=4 SV=1	tr|E1BZE1|E1BZE1_CHICK	K.VN(+.98)GQFSVLASK.C	Y	49.69	1149.6	11	0.9	575.809	2	22.21		F11:356	1	118	128	Deamidation (NQ)	N2:Deamidation (NQ):26.31
Sample 1	11	20	Vitronectin OS=Gallus gallus PE=2 SV=1	tr|O12945|O12945_CHICK	R.FDDGALDPGYPR.D	Y	31.83	1321.59	12	0.8	661.805	2	22.24		F11:357	2	228	239
Sample 1	11	21	Uncharacterized protein OS=Gallus gallus GN=VTN PE=4 SV=2	tr|E1C7A7|E1C7A7_CHICK	R.FDDGALDPGYPR.D	Y	31.83	1321.59	12	0.8	661.805	2	22.24		F11:357	2	228	239
Sample 1	3	6	Apolipoprotein A-I OS=Gallus gallus GN=APOA1 PE=1 SV=2	P08250|APOA1_CHICK	K.W(+31.99)TEELEQYR.Q	Y	38.97	1284.56	9	0.7	643.289	2	22.33		F11:360	1	131	139	Dihydroxy	W1:Dihydroxy:50.34
Sample 1	3	6	Apolipoprotein A-I OS=Gallus gallus GN=APOA1 PE=1 SV=2	P08250|APOA1_CHICK	K.W(+31.99)TEELEQYR(+15.99).Q	Y	14.07	1300.56	9	0.8	651.286	2	22.37		F11:361	1	131	139	Dihydroxy; Oxidation or Hydroxylation	W1:Dihydroxy:34.75;R9:Oxidation or Hydroxylation:8.14
Sample 1	3	6	Apolipoprotein A-I OS=Gallus gallus GN=APOA1 PE=1 SV=2	P08250|APOA1_CHICK	K.M(+15.99)TPLVQEFR.E	Y	48.99	1135.57	9	0.4	568.792	2	22.58		F11:368	3	230	238	Oxidation (M)	M1:Oxidation (M):1000.00
Sample 1	1	1	Collagen alpha-2(I) chain OS=Gallus gallus GN=COL1A2 PE=4 SV=1	tr|F1P0H9|F1P0H9_CHICK	K.GETGPTGAIGPIGASGPP(+15.99)GPVGAAGPAGPR.G	Y	52.8	2538.28	30	0.7	1270.15	2	22.66		F11:371	4	747	776	Oxidation or Hydroxylation	P18:Oxidation or Hydroxylation:41.33
Sample 1	3	6	Apolipoprotein A-I OS=Gallus gallus GN=APOA1 PE=1 SV=2	P08250|APOA1_CHICK	R.EM(+15.99)WLKDTEALR.A	Y	46.67	1406.69	11	0.6	704.351	2	22.75		F11:374	4	96	106	Oxidation (M)	M2:Oxidation (M):1000.00
Sample 1	3	6	Apolipoprotein A-I OS=Gallus gallus GN=APOA1 PE=1 SV=2	P08250|APOA1_CHICK	K.ASGKDAIAQFESSAVGK.Q	Y	47.71	1664.84	17	1.3	833.427	2	23.04		F11:382	4	47	63
Sample 1	12	2181	Uncharacterized protein OS=Gallus gallus GN=LECT2 PE=4 SV=2	tr|F1NEF7|F1NEF7_CHICK	R.HWAQIC(+57.02)SGNPFNR.I	Y	46.17	1585.72	13	0.8	793.868	2	23.12		F11:385	1	32	44	Carbamidomethylation	C6:Carbamidomethylation:1000.00
Sample 1	12	2182	Myeloid protein 1 OS=Gallus gallus GN=MIM1 PE=1 SV=2	P08940|MIM1_CHICK	R.HWAQIC(+57.02)SGNPFNR.I	Y	46.17	1585.72	13	0.8	793.868	2	23.12		F11:385	1	32	44	Carbamidomethylation	C6:Carbamidomethylation:1000.00
Sample 1	1	1	Collagen alpha-2(I) chain OS=Gallus gallus GN=COL1A2 PE=4 SV=1	tr|F1P0H9|F1P0H9_CHICK	R.GDP(+15.99)GPVGPVGPAGAFGPR.G	Y	54.85	1619.81	18	0.7	810.911	2	23.37		F11:391	4	978	995	Oxidation or Hydroxylation	P3:Oxidation or Hydroxylation:17.01
Sample 1	1	1	Collagen alpha-2(I) chain OS=Gallus gallus GN=COL1A2 PE=4 SV=1	tr|F1P0H9|F1P0H9_CHICK	R.GDPGPVGPVGPAGAFGPR.G	Y	57.5	1603.81	18	1.2	802.913	2	23.67		F11:400	5	978	995
Sample 1	1	1	Collagen alpha-2(I) chain OS=Gallus gallus GN=COL1A2 PE=4 SV=1	tr|F1P0H9|F1P0H9_CHICK	R.GFP(+15.99)GTP(+15.99)GLPGFK(+15.99).G	Y	42	1221.6	12	0.7	611.809	2	23.7		F11:401	1	165	176	Oxidation or Hydroxylation	P3:Oxidation or Hydroxylation:17.01;P6:Oxidation or Hydroxylation:49.37;K12:Oxidation or Hydroxylation:0.00
Sample 1	1	1	Collagen alpha-2(I) chain OS=Gallus gallus GN=COL1A2 PE=4 SV=1	tr|F1P0H9|F1P0H9_CHICK	R.GFP(+15.99)GTP(+15.99)GLP(+15.99)GFK.G	Y	41.61	1221.6	12	0.6	611.809	2	24		F11:411	2	165	176	Oxidation or Hydroxylation	P3:Oxidation or Hydroxylation:17.01;P6:Oxidation or Hydroxylation:30.64;P9:Oxidation or Hydroxylation:0.00
Sample 1	3	6	Apolipoprotein A-I OS=Gallus gallus GN=APOA1 PE=1 SV=2	P08250|APOA1_CHICK	R.IRDM(+15.99)VDVYLETVK.A	Y	43.03	1595.82	13	1.3	532.949	3	24.14		F11:416	5	34	46	Oxidation (M)	M4:Oxidation (M):1000.00
Sample 1	1	1	Collagen alpha-2(I) chain OS=Gallus gallus GN=COL1A2 PE=4 SV=1	tr|F1P0H9|F1P0H9_CHICK	R.GLP(+15.99)GIAGATGEP(+15.99)GPLGVSGPPGAR(+15.99).G	Y	45.75	2132.09	24	1.2	1067.05	2	24.2		F11:418	5	882	905	Oxidation or Hydroxylation	P3:Oxidation or Hydroxylation:134.40;P12:Oxidation or Hydroxylation:17.01;R24:Oxidation or Hydroxylation:4.08
Sample 1	3	6	Apolipoprotein A-I OS=Gallus gallus GN=APOA1 PE=1 SV=2	P08250|APOA1_CHICK	R.IRD(+15.99)MVDVYLETVK.A	Y	38.7	1595.82	13	0.2	532.948	3	24.28		F11:421	1	34	46	Oxidation or Hydroxylation	D3:Oxidation or Hydroxylation:0.00
Sample 1	1	1	Collagen alpha-2(I) chain OS=Gallus gallus GN=COL1A2 PE=4 SV=1	tr|F1P0H9|F1P0H9_CHICK	K.AADFGPGPMGLM(+15.99)GPR.G	Y	44.06	1488.69	15	0.7	745.351	2	24.52		F11:428	2	84	98	Oxidation (M)	M12:Oxidation (M):0.00
Sample 1	13	36	Uncharacterized protein OS=Gallus gallus GN=OMD PE=4 SV=1	tr|R4GF52|R4GF52_CHICK	M.NNLMQLNLC(+57.02)NNK.L	Y	31.45	1474.7	12	0.1	738.358	2	24.65		F11:431	1	211	222	Carbamidomethylation	C9:Carbamidomethylation:1000.00
Sample 1	9	7877	Hemoglobin subunit beta OS=Gallus gallus GN=HBB PE=1 SV=2	P02112|HBB_CHICK	F.GNLSSPTAILGNPMVR(+15.99).A	Y	35.16	1641.85	16	1.8	821.934	2	24.85		F11:436	1	47	62	Oxidation or Hydroxylation	R16:Oxidation or Hydroxylation:0.00
Sample 1	13	36	Uncharacterized protein OS=Gallus gallus GN=OMD PE=4 SV=1	tr|R4GF52|R4GF52_CHICK	K.QVFYIPR.S	Y	33.69	921.507	7	0.8	461.761	2	24.98		F11:440	1	294	300
Sample 1	4	8	SPARC OS=Gallus gallus GN=SPARC PE=4 SV=1	tr|F1P291|F1P291_CHICK	F.GIKEQDIDKDLVI	Y	30.15	1484.81	13	0.9	743.412	2	25.41		F11:452	2	286	298
Sample 1	4	9	SPARC OS=Gallus gallus GN=SPARC PE=2 SV=1	P36377|SPRC_CHICK	F.GIKEQDIDKDLVI	Y	30.15	1484.81	13	0.9	743.412	2	25.41		F11:452	2	286	298
Sample 1	10	10	Decorin OS=Gallus gallus GN=DCN PE=1 SV=1	P28675|PGS2_CHICK	K.ISPAAFAPLK.K	Y	50.8	1013.59	10	0.8	507.803	2	25.5		F11:455	2	118	127
Sample 1	10	11	Decorin OS=Gallus gallus GN=DCN PE=4 SV=2	tr|E1BRE9|E1BRE9_CHICK	K.ISPAAFAPLK.K	Y	50.8	1013.59	10	0.8	507.803	2	25.5		F11:455	2	118	127
Sample 1	3	6	Apolipoprotein A-I OS=Gallus gallus GN=APOA1 PE=1 SV=2	P08250|APOA1_CHICK	K.MTPLVQEFR.E	Y	49.55	1119.57	9	0.8	560.795	2	25.79		F11:463	3	230	238
Sample 1	12	2181	Uncharacterized protein OS=Gallus gallus GN=LECT2 PE=4 SV=2	tr|F1NEF7|F1NEF7_CHICK	R.FFHN(+.98)GNAIDDGVQIS.G	Y	17.44	1633.74	15	1.4	817.877	2	25.87		F11:466	1	94	108	Deamidation (NQ)	N4:Deamidation (NQ):11.10
Sample 1	12	2182	Myeloid protein 1 OS=Gallus gallus GN=MIM1 PE=1 SV=2	P08940|MIM1_CHICK	R.FFHN(+.98)GNAIDDGVQIS.G	Y	17.44	1633.74	15	1.4	817.877	2	25.87		F11:466	1	94	108	Deamidation (NQ)	N4:Deamidation (NQ):11.10
Sample 1	7	2	Serum albumin OS=Gallus gallus GN=ALB PE=4 SV=2	tr|F2Z4L6|F2Z4L6_CHICK	R.SQC(+57.02)IM(+15.99)EAEFDEKPADLPSLVEK.Y	N	27.9	2551.18	22	0.4	851.402	3	25.98		F11:469	2	265	286	Carbamidomethylation; Oxidation (M)	C3:Carbamidomethylation:1000.00;M5:Oxidation (M):1000.00
Sample 1	6	3	Serum albumin OS=Gallus gallus GN=ALB PE=1 SV=2	P19121|ALBU_CHICK	R.SQC(+57.02)IM(+15.99)EAEFDEKPADLPSLVEK.Y	N	27.9	2551.18	22	0.4	851.402	3	25.98		F11:469	2	315	336	Carbamidomethylation; Oxidation (M)	C3:Carbamidomethylation:1000.00;M5:Oxidation (M):1000.00
Sample 1	3	6	Apolipoprotein A-I OS=Gallus gallus GN=APOA1 PE=1 SV=2	P08250|APOA1_CHICK	K.IRPFLDQFSAK.W	Y	48.98	1320.72	11	0.6	441.247	3	26.17		F11:473	7	120	130
Sample 1	4	8	SPARC OS=Gallus gallus GN=SPARC PE=4 SV=1	tr|F1P291|F1P291_CHICK	R.LEAGDHTVELL.A	Y	27.61	1195.61	11	1	598.812	2	26.25		F11:476	3	201	211
Sample 1	4	9	SPARC OS=Gallus gallus GN=SPARC PE=2 SV=1	P36377|SPRC_CHICK	R.LEAGDHTVELL.A	Y	27.61	1195.61	11	1	598.812	2	26.25		F11:476	3	201	211
Sample 1	5	7	Uncharacterized protein OS=Gallus gallus GN=AHSG PE=4 SV=1	tr|E1BZE1|E1BZE1_CHICK	C.QLLPEDQSNFGFC(+57.02)TAK.M	Y	35.68	1853.86	16	0.7	927.939	2	26.76		F11:490	2	219	234	Carbamidomethylation	C13:Carbamidomethylation:1000.00
Sample 1	7	2	Serum albumin OS=Gallus gallus GN=ALB PE=4 SV=2	tr|F2Z4L6|F2Z4L6_CHICK	K.QSD(+57.02)INTCFGEEGANLIVQSR.A	N	30.29	2237.04	20	2.3	1119.53	2	27.18		F11:501	2	539	558	Carbamidomethylation (DHKE X@N-term)	D3:Carbamidomethylation (DHKE X@N-term):0.00
Sample 1	6	3	Serum albumin OS=Gallus gallus GN=ALB PE=1 SV=2	P19121|ALBU_CHICK	K.QSD(+57.02)INTCFGEEGANLIVQSR.A	N	30.29	2237.04	20	2.3	1119.53	2	27.18		F11:501	2	589	608	Carbamidomethylation (DHKE X@N-term)	D3:Carbamidomethylation (DHKE X@N-term):0.00
Sample 1	23	71	Histone H4 (Fragment) OS=Gallus gallus PE=3 SV=1	tr|Q6B834|Q6B834_CHICK	K.VFLENVIR.D	Y	35.22	988.571	8	0.5	495.293	2	27.51		F11:508	1	30	37
Sample 1	23	74	Histone H4 OS=Gallus gallus GN=H4-I PE=1 SV=2	P62801|H4_CHICK	K.VFLENVIR.D	Y	35.22	988.571	8	0.5	495.293	2	27.51		F11:508	1	61	68
Sample 1	23	75	Histone H4 type VIII OS=Gallus gallus GN=H4-VIII PE=3 SV=3	P70081|H48_CHICK	K.VFLENVIR.D	Y	35.22	988.571	8	0.5	495.293	2	27.51		F11:508	1	61	68
Sample 1	2	4	Collagen alpha-1(I) chain OS=Gallus gallus GN=COL1A1 PE=1 SV=3	P02457|CO1A1_CHICK	K.SGEYWIDPNQGC(+57.02)NLDAIK.V	Y	34.61	2078.94	18	1.3	1040.48	2	27.53		F11:509	2	1260	1277	Carbamidomethylation	C12:Carbamidomethylation:1000.00
Sample 1	4	8	SPARC OS=Gallus gallus GN=SPARC PE=4 SV=1	tr|F1P291|F1P291_CHICK	L.EEWASC(+57.02)FGIK.E	Y	32.61	1225.54	10	0.7	613.779	2	27.57		F11:510	1	279	288	Carbamidomethylation	C6:Carbamidomethylation:1000.00
Sample 1	4	9	SPARC OS=Gallus gallus GN=SPARC PE=2 SV=1	P36377|SPRC_CHICK	L.EEWASC(+57.02)FGIK.E	Y	32.61	1225.54	10	0.7	613.779	2	27.57		F11:510	1	279	288	Carbamidomethylation	C6:Carbamidomethylation:1000.00
Sample 1	10	10	Decorin OS=Gallus gallus GN=DCN PE=1 SV=1	P28675|PGS2_CHICK	K.IDAEGLSGLTNLAK.L	Y	52.02	1400.75	14	0.5	701.383	2	27.9		F11:517	2	234	247
Sample 1	10	11	Decorin OS=Gallus gallus GN=DCN PE=4 SV=2	tr|E1BRE9|E1BRE9_CHICK	K.IDAEGLSGLTNLAK.L	Y	52.02	1400.75	14	0.5	701.383	2	27.9		F11:517	2	234	247
Sample 1	3	6	Apolipoprotein A-I OS=Gallus gallus GN=APOA1 PE=1 SV=2	P08250|APOA1_CHICK	R.LTPVAQELKELTK.Q	Y	17.75	1468.85	13	1.1	735.433	2	27.93		F11:518	3	142	154
Sample 1	7	2	Serum albumin OS=Gallus gallus GN=ALB PE=4 SV=2	tr|F2Z4L6|F2Z4L6_CHICK	R.SQC(+57.02)IMEAEFDEKPADLPSLVEK.Y	N	31.34	2535.19	22	1.4	846.071	3	28.27		F11:526	2	265	286	Carbamidomethylation	C3:Carbamidomethylation:1000.00
Sample 1	6	3	Serum albumin OS=Gallus gallus GN=ALB PE=1 SV=2	P19121|ALBU_CHICK	R.SQC(+57.02)IMEAEFDEKPADLPSLVEK.Y	N	31.34	2535.19	22	1.4	846.071	3	28.27		F11:526	2	315	336	Carbamidomethylation	C3:Carbamidomethylation:1000.00
Sample 1	3	6	Apolipoprotein A-I OS=Gallus gallus GN=APOA1 PE=1 SV=2	P08250|APOA1_CHICK	K.DTEALRAELTKDLEEVKEK.I	Y	44.16	2216.15	19	0.5	555.046	4	28.43		F11:531	1	101	119
Sample 1	8	19	Uncharacterized protein OS=Gallus gallus GN=SERPINF1 PE=3 SV=1	tr|E1C7H6|E1C7H6_CHICK	R.LQSLFTSPDFTK.I	Y	49.66	1382.71	12	0.7	692.362	2	28.47		F11:532	3	337	348
Sample 1	9	7877	Hemoglobin subunit beta OS=Gallus gallus GN=HBB PE=1 SV=2	P02112|HBB_CHICK	K.QLITGLWGK.V	Y	30.59	1014.59	9	0.8	508.301	2	28.81		F11:542	1	10	18
Sample 1	17	616	Uncharacterized protein OS=Gallus gallus GN=THBS1 PE=4 SV=2	tr|F1P0J8|F1P0J8_CHICK	K.GGVNDNFQGLLQNVR.F	Y	28.5	1629.82	15	0.7	815.919	2	28.96		F11:546	1	207	221
Sample 1	7	2	Serum albumin OS=Gallus gallus GN=ALB PE=4 SV=2	tr|F2Z4L6|F2Z4L6_CHICK	R.MAC(+57.02)SEGYLSIVIHDTC(+57.02)R.K	N	17.23	2010.9	17	0.2	671.306	3	29.18		F11:550	1	424	440	Carbamidomethylation	C3:Carbamidomethylation:1000.00;C16:Carbamidomethylation:1000.00
Sample 1	6	3	Serum albumin OS=Gallus gallus GN=ALB PE=1 SV=2	P19121|ALBU_CHICK	R.MAC(+57.02)SEGYLSIVIHDTC(+57.02)R.K	N	17.23	2010.9	17	0.2	671.306	3	29.18		F11:550	1	474	490	Carbamidomethylation	C3:Carbamidomethylation:1000.00;C16:Carbamidomethylation:1000.00
Sample 1	8	19	Uncharacterized protein OS=Gallus gallus GN=SERPINF1 PE=3 SV=1	tr|E1C7H6|E1C7H6_CHICK	R.DDTTGTLLFIGK.I	Y	47.96	1279.67	12	0.8	640.841	2	29.43		F11:556	1	403	414
Sample 1	1	1	Collagen alpha-2(I) chain OS=Gallus gallus GN=COL1A2 PE=4 SV=1	tr|F1P0H9|F1P0H9_CHICK	K.TLNNQIETLLTPEGSK.K	Y	42.29	1756.92	16	4.4	879.471	2	29.87		F11:567	1	1136	1151
Sample 1	13	36	Uncharacterized protein OS=Gallus gallus GN=OMD PE=4 SV=1	tr|R4GF52|R4GF52_CHICK	Y.AFFC(+57.02)FPHIR.T	Y	43.32	1193.58	9	0.8	597.798	2	29.91		F11:568	2	350	358	Carbamidomethylation	C4:Carbamidomethylation:1000.00
Sample 1	10	10	Decorin OS=Gallus gallus GN=DCN PE=1 SV=1	P28675|PGS2_CHICK	K.IASIGINDFC(+57.02)PLGYNTK.K	Y	45.33	1881.93	17	1.1	941.973	2	30.42		F11:580	2	302	318	Carbamidomethylation	C10:Carbamidomethylation:1000.00
Sample 1	10	11	Decorin OS=Gallus gallus GN=DCN PE=4 SV=2	tr|E1BRE9|E1BRE9_CHICK	K.IASIGINDFC(+57.02)PLGYNTK.K	Y	45.33	1881.93	17	1.1	941.973	2	30.42		F11:580	2	302	318	Carbamidomethylation	C10:Carbamidomethylation:1000.00
Sample 1	3	6	Apolipoprotein A-I OS=Gallus gallus GN=APOA1 PE=1 SV=2	P08250|APOA1_CHICK	R.DMVDVYLETVK.A	Y	34.41	1310.64	11	0.7	656.329	2	30.49		F11:582	1	36	46
Sample 1	7	2	Serum albumin OS=Gallus gallus GN=ALB PE=4 SV=2	tr|F2Z4L6|F2Z4L6_CHICK	K.LLINLIK.R	N	14.69	825.569	7	0.5	413.792	2	30.58		F11:584	1	506	512
Sample 1	6	3	Serum albumin OS=Gallus gallus GN=ALB PE=1 SV=2	P19121|ALBU_CHICK	K.LLINLIK.R	N	14.69	825.569	7	0.5	413.792	2	30.58		F11:584	1	556	562
Sample 1	7	2	Serum albumin OS=Gallus gallus GN=ALB PE=4 SV=2	tr|F2Z4L6|F2Z4L6_CHICK	R.RHPFLYAPAIL.S	N	35.43	1296.73	11	0.5	649.375	2	30.63		F11:585	2	123	133
Sample 1	6	3	Serum albumin OS=Gallus gallus GN=ALB PE=1 SV=2	P19121|ALBU_CHICK	R.RHPFLYAPAIL.S	N	35.43	1296.73	11	0.5	649.375	2	30.63		F11:585	2	173	183
Sample 1	5	7	Uncharacterized protein OS=Gallus gallus GN=AHSG PE=4 SV=1	tr|E1BZE1|E1BZE1_CHICK	K.QYHPVQ(sub R)MVSVEFAVA.A	Y	15.75	1703.83	15	1.2	852.925	2	30.82		F11:589	1	188	202	Mutation
Sample 1	11	20	Vitronectin OS=Gallus gallus PE=2 SV=1	tr|O12945|O12945_CHICK	R.SIAQYWLDC(+57.02)PQPDEEST	Y	13.78	2037.86	17	0.7	1019.94	2	30.85		F11:590	1	437	453	Carbamidomethylation	C9:Carbamidomethylation:1000.00
Sample 1	11	21	Uncharacterized protein OS=Gallus gallus GN=VTN PE=4 SV=2	tr|E1C7A7|E1C7A7_CHICK	R.SIAQYWLDC(+57.02)PQPDEEST	Y	13.78	2037.86	17	0.7	1019.94	2	30.85		F11:590	1	437	453	Carbamidomethylation	C9:Carbamidomethylation:1000.00
Sample 1	7	2	Serum albumin OS=Gallus gallus GN=ALB PE=4 SV=2	tr|F2Z4L6|F2Z4L6_CHICK	K.YVPPPFNPDMF(+15.99)SFDEK.L	N	19.07	1944.86	16	1.7	973.439	2	30.96		F11:593	2	475	490	Oxidation or Hydroxylation	F11:Oxidation or Hydroxylation:9.42
Sample 1	6	3	Serum albumin OS=Gallus gallus GN=ALB PE=1 SV=2	P19121|ALBU_CHICK	K.YVPPPFNPDMF(+15.99)SFDEK.L	N	19.07	1944.86	16	1.7	973.439	2	30.96		F11:593	2	525	540	Oxidation or Hydroxylation	F11:Oxidation or Hydroxylation:9.42
Sample 1	17	616	Uncharacterized protein OS=Gallus gallus GN=THBS1 PE=4 SV=2	tr|F1P0J8|F1P0J8_CHICK	K.FQDLLDIIHAEK.G	Y	41.67	1440.76	12	0.5	481.261	3	31.43		F11:603	1	80	91
Sample 1	19	13411	Vimentin (Fragment) OS=Gallus gallus GN=vimentin PE=4 SV=1	tr|Q49MC1|Q49MC1_CHICK	K.ILLAELEQLK.G	Y	40.18	1168.71	10	0.6	585.361	2	31.71		F11:609	2	104	113
Sample 1	19	13412	Vimentin OS=Gallus gallus GN=VIM PE=3 SV=2	P09654|VIME_CHICK	K.ILLAELEQLK.G	Y	40.18	1168.71	10	0.6	585.361	2	31.71		F11:609	2	124	133
Sample 1	19	13413	Vimentin OS=Gallus gallus GN=VIM PE=3 SV=1	tr|F1NJ08|F1NJ08_CHICK	K.ILLAELEQLK.G	Y	40.18	1168.71	10	0.6	585.361	2	31.71		F11:609	2	124	133
Sample 1	17	616	Uncharacterized protein OS=Gallus gallus GN=THBS1 PE=4 SV=2	tr|F1P0J8|F1P0J8_CHICK	K.QQLVSVEDALLATGHWK.N	Y	20.86	1893.99	17	0.3	632.339	3	31.8		F11:611	1	143	159
Sample 1	4	8	SPARC OS=Gallus gallus GN=SPARC PE=4 SV=1	tr|F1P291|F1P291_CHICK	K.NVLITL.Y	Y	23.43	671.422	6	1	672.43	1	32.07		F11:617	1	168	173
Sample 1	4	9	SPARC OS=Gallus gallus GN=SPARC PE=2 SV=1	P36377|SPRC_CHICK	K.NVLITL.Y	Y	23.43	671.422	6	1	672.43	1	32.07		F11:617	1	168	173
Sample 1	15	39	Histone H2B 8 OS=Gallus gallus GN=H2B-VIII PE=1 SV=3	Q9PSW9|H2B8_CHICK	K.AM(+31.99)GIMNSFVNDIFER.I	Y	30.24	1774.8	15	1.5	888.409	2	32.11		F11:618	1	59	73	Sulphone	M2:Sulphone:0.00
Sample 1	15	40	Histone H2B 5 OS=Gallus gallus GN=H2B-V PE=1 SV=2	P0C1H4|H2B5_CHICK	K.AM(+31.99)GIMNSFVNDIFER.I	Y	30.24	1774.8	15	1.5	888.409	2	32.11		F11:618	1	59	73	Sulphone	M2:Sulphone:0.00
Sample 1	15	41	Histone H2B 1/2/3/4/6 OS=Gallus gallus GN=H2B-I PE=1 SV=2	P0C1H3|H2B1_CHICK	K.AM(+31.99)GIMNSFVNDIFER.I	Y	30.24	1774.8	15	1.5	888.409	2	32.11		F11:618	1	59	73	Sulphone	M2:Sulphone:0.00
Sample 1	15	42	Histone H2B (Fragment) OS=Gallus gallus GN=HIST1H2B5L PE=3 SV=1	tr|A0A0A0MQ64|A0A0A0MQ64_CHICK	K.AM(+31.99)GIMNSFVNDIFER.I	Y	30.24	1774.8	15	1.5	888.409	2	32.11		F11:618	1	76	90	Sulphone	M2:Sulphone:0.00
Sample 1	9	7877	Hemoglobin subunit beta OS=Gallus gallus GN=HBB PE=1 SV=2	P02112|HBB_CHICK	R.LLIVYPWTQR.F	Y	32.54	1287.73	10	0.6	644.875	2	32.18		F11:620	3	32	41
Sample 1	5	7	Uncharacterized protein OS=Gallus gallus GN=AHSG PE=4 SV=1	tr|E1BZE1|E1BZE1_CHICK	K.ISHNNPVAS(+79.97)ESSSS(+79.97)EFPSLL.S	Y	20.35	2260.93	20	1.1	1131.47	2	32.72		F11:632	1	284	303	Phosphorylation (STY)	S9:Phosphorylation (STY):0.00;S14:Phosphorylation (STY):7.77
Sample 1	3	6	Apolipoprotein A-I OS=Gallus gallus GN=APOA1 PE=1 SV=2	P08250|APOA1_CHICK	R.LISFLDELQKS.V	Y	33.6	1291.7	11	0.5	646.859	2	32.89		F11:637	1	252	262
Sample 1	5	7	Uncharacterized protein OS=Gallus gallus GN=AHSG PE=4 SV=1	tr|E1BZE1|E1BZE1_CHICK	S.SALNDYNSKNPDVYLM(+15.99)LLEIGR.A	Y	12.34	2540.26	22	1.3	847.761	3	32.92		F11:638	1	163	184	Oxidation (M)	M16:Oxidation (M):1000.00
Sample 1	4	8	SPARC OS=Gallus gallus GN=SPARC PE=4 SV=1	tr|F1P291|F1P291_CHICK	Y.IFPVHWQFGQLDQHPIDGYLSHTELAPLR.A	Y	55.09	3413.73	29	1.5	854.441	4	33.18		F11:644	4	223	251
Sample 1	4	9	SPARC OS=Gallus gallus GN=SPARC PE=2 SV=1	P36377|SPRC_CHICK	Y.IFPVHWQFGQLDQHPIDGYLSHTELAPLR.A	Y	55.09	3413.73	29	1.5	854.441	4	33.18		F11:644	4	223	251
Sample 1	7	2	Serum albumin OS=Gallus gallus GN=ALB PE=4 SV=2	tr|F2Z4L6|F2Z4L6_CHICK	R.VSFLGHFIYS.V	N	29.41	1168.59	10	0.8	585.304	2	33.24		F11:646	2	110	119
Sample 1	6	3	Serum albumin OS=Gallus gallus GN=ALB PE=1 SV=2	P19121|ALBU_CHICK	R.VSFLGHFIYS.V	N	29.41	1168.59	10	0.8	585.304	2	33.24		F11:646	2	160	169
Sample 1	6	3	Serum albumin OS=Gallus gallus GN=ALB PE=1 SV=2	P19121|ALBU_CHICK	K.AVAMITFAQYLQR.C	Y	38.81	1510.8	13	0.4	756.406	2	33.68		F11:653	2	48	60
Sample 1	3	6	Apolipoprotein A-I OS=Gallus gallus GN=APOA1 PE=1 SV=2	P08250|APOA1_CHICK	R.EM(+15.99)WLKDTEALRAELTKDLEEVKEK.I	Y	43.56	2919.49	24	1	584.906	5	34.03		F11:661	7	96	119	Oxidation (M)	M2:Oxidation (M):1000.00
Sample 1	4	8	SPARC OS=Gallus gallus GN=SPARC PE=4 SV=1	tr|F1P291|F1P291_CHICK	Y.IFPVHWQFGQLDQHPIDGYLSHTELAPLRAPLIPMEHC(+57.02)TTR.F	Y	25.36	4820.41	41	2.1	804.411	6	34.19		F11:665	1	223	263	Carbamidomethylation	C38:Carbamidomethylation:1000.00
Sample 1	4	9	SPARC OS=Gallus gallus GN=SPARC PE=2 SV=1	P36377|SPRC_CHICK	Y.IFPVHWQFGQLDQHPIDGYLSHTELAPLRAPLIPMEHC(+57.02)TTR.F	Y	25.36	4820.41	41	2.1	804.411	6	34.19		F11:665	1	223	263	Carbamidomethylation	C38:Carbamidomethylation:1000.00
Sample 1	4	8	SPARC OS=Gallus gallus GN=SPARC PE=4 SV=1	tr|F1P291|F1P291_CHICK	K.NYN(+15.99)MYIFPVHWQFGQLDQHPIDGYLSHTELAPLR.A	Y	51.26	4114.98	34	-0.1	1029.75	4	34.79		F11:676	1	218	251	Oxidation or Hydroxylation	N3:Oxidation or Hydroxylation:11.10
Sample 1	4	9	SPARC OS=Gallus gallus GN=SPARC PE=2 SV=1	P36377|SPRC_CHICK	K.NYN(+15.99)MYIFPVHWQFGQLDQHPIDGYLSHTELAPLR.A	Y	51.26	4114.98	34	-0.1	1029.75	4	34.79		F11:676	1	218	251	Oxidation or Hydroxylation	N3:Oxidation or Hydroxylation:11.10
Sample 1	4	8	SPARC OS=Gallus gallus GN=SPARC PE=4 SV=1	tr|F1P291|F1P291_CHICK	K.FIPAC(+57.02)LDTELTEFPLR.M	Y	41	1920.97	16	1.2	961.491	2	34.96		F11:679	6	146	161	Carbamidomethylation	C5:Carbamidomethylation:1000.00
Sample 1	4	9	SPARC OS=Gallus gallus GN=SPARC PE=2 SV=1	P36377|SPRC_CHICK	K.FIPAC(+57.02)LDTELTEFPLR.M	Y	41	1920.97	16	1.2	961.491	2	34.96		F11:679	6	146	161	Carbamidomethylation	C5:Carbamidomethylation:1000.00
Sample 1	5	7	Uncharacterized protein OS=Gallus gallus GN=AHSG PE=4 SV=1	tr|E1BZE1|E1BZE1_CHICK	K.NPDVYLML.L	Y	14.92	963.473	8	1.7	964.482	1	35.44		F11:689	1	172	179
Sample 1	7	2	Serum albumin OS=Gallus gallus GN=ALB PE=4 SV=2	tr|F2Z4L6|F2Z4L6_CHICK	R.RHPFLYAPAILSF.A	N	30.42	1530.83	13	0.9	766.425	2	35.6		F11:692	1	123	135
Sample 1	6	3	Serum albumin OS=Gallus gallus GN=ALB PE=1 SV=2	P19121|ALBU_CHICK	R.RHPFLYAPAILSF.A	N	30.42	1530.83	13	0.9	766.425	2	35.6		F11:692	1	173	185
Sample 1	4	8	SPARC OS=Gallus gallus GN=SPARC PE=4 SV=1	tr|F1P291|F1P291_CHICK	K.FIPACLDTE(+57.02)LTEFPLR.M	Y	31.99	1920.97	16	1.3	641.33	3	35.64		F11:693	2	146	161	Carbamidomethylation (DHKE X@N-term)	E9:Carbamidomethylation (DHKE X@N-term):0.00
Sample 1	4	9	SPARC OS=Gallus gallus GN=SPARC PE=2 SV=1	P36377|SPRC_CHICK	K.FIPACLDTE(+57.02)LTEFPLR.M	Y	31.99	1920.97	16	1.3	641.33	3	35.64		F11:693	2	146	161	Carbamidomethylation (DHKE X@N-term)	E9:Carbamidomethylation (DHKE X@N-term):0.00
Sample 1	7	2	Serum albumin OS=Gallus gallus GN=ALB PE=4 SV=2	tr|F2Z4L6|F2Z4L6_CHICK	K.C(+57.02)VANEDAT(sub P)EC(+57.02)SKPLPSIILDEIC(+57.02)QVEK.L	N	12.22	3117.47	27	5.8	1040.17	3	36.14		F11:701	1	30	56	Carbamidomethylation; Mutation	C1:Carbamidomethylation:1000.00;C10:Carbamidomethylation:1000.00;C23:Carbamidomethylation:1000.00
Sample 1	6	3	Serum albumin OS=Gallus gallus GN=ALB PE=1 SV=2	P19121|ALBU_CHICK	K.C(+57.02)VANEDAT(sub P)EC(+57.02)SKPLPSIILDEIC(+57.02)QVEK.L	N	12.22	3117.47	27	5.8	1040.17	3	36.14		F11:701	1	80	106	Carbamidomethylation; Mutation	C1:Carbamidomethylation:1000.00;C10:Carbamidomethylation:1000.00;C23:Carbamidomethylation:1000.00
Sample 1	15	39	Histone H2B 8 OS=Gallus gallus GN=H2B-VIII PE=1 SV=3	Q9PSW9|H2B8_CHICK	K.AM(+15.99)GIMNSFVNDIFER.I	Y	42.39	1758.81	15	1	880.412	2	36.52		F11:707	2	59	73	Oxidation (M)	M2:Oxidation (M):38.16
Sample 1	15	40	Histone H2B 5 OS=Gallus gallus GN=H2B-V PE=1 SV=2	P0C1H4|H2B5_CHICK	K.AM(+15.99)GIMNSFVNDIFER.I	Y	42.39	1758.81	15	1	880.412	2	36.52		F11:707	2	59	73	Oxidation (M)	M2:Oxidation (M):38.16
Sample 1	15	41	Histone H2B 1/2/3/4/6 OS=Gallus gallus GN=H2B-I PE=1 SV=2	P0C1H3|H2B1_CHICK	K.AM(+15.99)GIMNSFVNDIFER.I	Y	42.39	1758.81	15	1	880.412	2	36.52		F11:707	2	59	73	Oxidation (M)	M2:Oxidation (M):38.16
Sample 1	15	42	Histone H2B (Fragment) OS=Gallus gallus GN=HIST1H2B5L PE=3 SV=1	tr|A0A0A0MQ64|A0A0A0MQ64_CHICK	K.AM(+15.99)GIMNSFVNDIFER.I	Y	42.39	1758.81	15	1	880.412	2	36.52		F11:707	2	76	90	Oxidation (M)	M2:Oxidation (M):38.16
Sample 1	4	8	SPARC OS=Gallus gallus GN=SPARC PE=4 SV=1	tr|F1P291|F1P291_CHICK	C.DLDNDKYIALEEWASC(+57.02)FGIK.E	Y	11.91	2386.11	20	1.3	796.38	3	37.07		F11:716	1	269	288	Carbamidomethylation	C16:Carbamidomethylation:1000.00
Sample 1	11	20	Vitronectin OS=Gallus gallus PE=2 SV=1	tr|O12945|O12945_CHICK	K.LISDVWGIEGPIDAAFTR.I	Y	49.71	1959.01	18	1.3	654.011	3	37.1		F11:717	4	193	210
Sample 1	11	21	Uncharacterized protein OS=Gallus gallus GN=VTN PE=4 SV=2	tr|E1C7A7|E1C7A7_CHICK	K.LISDVWGIEGPIDAAFTR.I	Y	49.71	1959.01	18	1.3	654.011	3	37.1		F11:717	4	193	210
Sample 1	2	4	Collagen alpha-1(I) chain OS=Gallus gallus GN=COL1A1 PE=1 SV=3	P02457|CO1A1_CHICK	R.LPIIDLAPM.D	Y	15	981.557	9	1.9	982.566	1	37.14		F11:718	1	1426	1434
Sample 1	1	1	Collagen alpha-2(I) chain OS=Gallus gallus GN=COL1A2 PE=4 SV=1	tr|F1P0H9|F1P0H9_CHICK	R.TNKPSRLPILDIAPLDIGGADQEFGLHIGPVC(+57.02)FK	Y	56.96	3687.94	34	1.8	922.995	4	37.22		F11:720	8	1330	1363	Carbamidomethylation	C32:Carbamidomethylation:1000.00
Sample 1	4	8	SPARC OS=Gallus gallus GN=SPARC PE=4 SV=1	tr|F1P291|F1P291_CHICK	K.N(+15.99)YNMYIFPVHWQF.G	Y	12.09	1773.8	13	1	887.907	2	37.57		F11:728	1	218	230	Oxidation or Hydroxylation	N1:Oxidation or Hydroxylation:8.69
Sample 1	4	9	SPARC OS=Gallus gallus GN=SPARC PE=2 SV=1	P36377|SPRC_CHICK	K.N(+15.99)YNMYIFPVHWQF.G	Y	12.09	1773.8	13	1	887.907	2	37.57		F11:728	1	218	230	Oxidation or Hydroxylation	N1:Oxidation or Hydroxylation:8.69
Sample 1	23	74	Histone H4 OS=Gallus gallus GN=H4-I PE=1 SV=2	P62801|H4_CHICK	K.VFLENVIRDAVTYTEHAK.R	Y	17.19	2104.1	18	0.6	702.373	3	37.76		F11:730	1	61	78
Sample 1	23	75	Histone H4 type VIII OS=Gallus gallus GN=H4-VIII PE=3 SV=3	P70081|H48_CHICK	K.VFLENVIRDAVTYTEHAK.R	Y	17.19	2104.1	18	0.6	702.373	3	37.76		F11:730	1	61	78
Sample 1	5	7	Uncharacterized protein OS=Gallus gallus GN=AHSG PE=4 SV=1	tr|E1BZE1|E1BZE1_CHICK	K.NPDVYLMLLEIGR.A	Y	46.15	1531.81	13	0.6	766.911	2	38		F11:733	2	172	184
Sample 1	15	39	Histone H2B 8 OS=Gallus gallus GN=H2B-VIII PE=1 SV=3	Q9PSW9|H2B8_CHICK	K.AMGIMNSFVNDIFER.I	Y	43.81	1742.81	15	1.5	872.415	2	38.85		F11:744	2	59	73
Sample 1	15	40	Histone H2B 5 OS=Gallus gallus GN=H2B-V PE=1 SV=2	P0C1H4|H2B5_CHICK	K.AMGIMNSFVNDIFER.I	Y	43.81	1742.81	15	1.5	872.415	2	38.85		F11:744	2	59	73
Sample 1	15	41	Histone H2B 1/2/3/4/6 OS=Gallus gallus GN=H2B-I PE=1 SV=2	P0C1H3|H2B1_CHICK	K.AMGIMNSFVNDIFER.I	Y	43.81	1742.81	15	1.5	872.415	2	38.85		F11:744	2	59	73
Sample 1	15	42	Histone H2B (Fragment) OS=Gallus gallus GN=HIST1H2B5L PE=3 SV=1	tr|A0A0A0MQ64|A0A0A0MQ64_CHICK	K.AMGIMNSFVNDIFER.I	Y	43.81	1742.81	15	1.5	872.415	2	38.85		F11:744	2	76	90
Sample 1	8	19	Uncharacterized protein OS=Gallus gallus GN=SERPINF1 PE=3 SV=1	tr|E1C7H6|E1C7H6_CHICK	R.LTFPIEYHVDRPFLLVL.R	Y	14.2	2071.15	17	0.7	691.391	3	39.56		F11:751	1	385	401
Sample 1	26	13415	Uncharacterized protein OS=Gallus gallus GN=RCJMB04_34k20 PE=2 SV=1	tr|Q5F347|Q5F347_CHICK	R.AKFYPEDVAEELIQDITQR.L	Y	30.04	2264.13	19	0.7	755.719	3	40.61		F11:762	1	82	100
Sample 1	26	13416	Uncharacterized protein OS=Gallus gallus GN=Gga.3145 PE=4 SV=1	tr|E1BV34|E1BV34_CHICK	R.AKFYPEDVAEELIQDITQR.L	Y	30.04	2264.13	19	0.7	755.719	3	40.61		F11:762	1	82	100
Sample 1	20	13414	Annexin A2 OS=Gallus gallus GN=ANXA2 PE=1 SV=2	P17785|ANXA2_CHICK	K.SALSGHLEAVILGLLK.T	Y	34.45	1619.96	16	0.1	810.988	2	40.69		F11:763	2	89	104
Sample 2	1	1	Collagen alpha-2(I) chain OS=Gallus gallus GN=COL1A2 PE=4 SV=1	tr|F1P0H9|F1P0H9_CHICK	R.GAP(+15.99)GNPGPSGALGAP(+31.99)GPHGQVGPSGKPGNR.G	Y	23.37	2692.31	30	0.7	674.084	4	13.72		F12:112	1	948	977	Oxidation or Hydroxylation; Dihydroxy	P3:Oxidation or Hydroxylation:14.04;P15:Dihydroxy:0.00
Sample 2	1	1	Collagen alpha-2(I) chain OS=Gallus gallus GN=COL1A2 PE=4 SV=1	tr|F1P0H9|F1P0H9_CHICK	R.GAP(+15.99)GNPGPSGALGAP(+15.99)GPHGQVGPSGKP(+15.99)GNR.G	Y	36.04	2692.31	30	1.3	898.444	3	13.84		F12:116	1	948	977	Oxidation or Hydroxylation	P3:Oxidation or Hydroxylation:26.31;P15:Oxidation or Hydroxylation:36.20;P27:Oxidation or Hydroxylation:44.14
Sample 2	2	4	Collagen alpha-1(I) chain OS=Gallus gallus GN=COL1A1 PE=1 SV=3	P02457|CO1A1_CHICK	L.QGP(+15.99)PGPP(+15.99)GAP(+15.99)GEQGPSGASGPAGPR.G	Y	33.93	2227.03	25	1	743.35	3	13.87		F12:117	2	1106	1130	Oxidation or Hydroxylation	P3:Oxidation or Hydroxylation:0.00;P7:Oxidation or Hydroxylation:30.46;P10:Oxidation or Hydroxylation:61.26
Sample 2	2	4	Collagen alpha-1(I) chain OS=Gallus gallus GN=COL1A1 PE=1 SV=3	P02457|CO1A1_CHICK	K.GDRGETGPAGP(+15.99)PGAP(+15.99)GAPGAP(+15.99)GPVGPAGK.N	Y	28.97	2496.2	29	1.1	833.075	3	14.5		F12:131	1	1023	1051	Oxidation or Hydroxylation	P11:Oxidation or Hydroxylation:0.00;P15:Oxidation or Hydroxylation:28.36;P21:Oxidation or Hydroxylation:14.04
Sample 2	2	4	Collagen alpha-1(I) chain OS=Gallus gallus GN=COL1A1 PE=1 SV=3	P02457|CO1A1_CHICK	R.GAP(+15.99)GPP(+15.99)GAVGAAGKDGEAGAQGPPGPTGPAGER.G	Y	34.15	2839.35	33	1.5	947.458	3	15.18		F12:148	2	588	620	Oxidation or Hydroxylation	P3:Oxidation or Hydroxylation:22.85;P6:Oxidation or Hydroxylation:14.02
Sample 2	5	7	Uncharacterized protein OS=Gallus gallus GN=AHSG PE=4 SV=1	tr|E1BZE1|E1BZE1_CHICK	R.TFAEHAVEGDC(+57.02)DVK.L	Y	53.35	1576.68	14	1	789.349	2	15.49		F12:156	8	101	114	Carbamidomethylation	C11:Carbamidomethylation:1000.00
Sample 2	7	2	Serum albumin OS=Gallus gallus GN=ALB PE=4 SV=2	tr|F2Z4L6|F2Z4L6_CHICK	R.KQETTPINDNVSQC(+57.02)C(+57.02)SSSYANR.R	Y	29.78	2558.11	22	1.7	853.713	3	15.59		F12:160	1	441	462	Carbamidomethylation	C14:Carbamidomethylation:1000.00;C15:Carbamidomethylation:1000.00
Sample 2	1	1	Collagen alpha-2(I) chain OS=Gallus gallus GN=COL1A2 PE=4 SV=1	tr|F1P0H9|F1P0H9_CHICK	R.VGP(+15.99)P(+15.99)GPAGITGPP(+15.99)GPP(+15.99)GPAGK.D	Y	22.1	1840.93	21	1.3	921.474	2	17.14		F12:201	3	794	814	Oxidation or Hydroxylation	P3:Oxidation or Hydroxylation:20.70;P4:Oxidation or Hydroxylation:14.63;P13:Oxidation or Hydroxylation:21.94;P16:Oxidation or Hydroxylation:0.00
Sample 2	3	6	Apolipoprotein A-I OS=Gallus gallus GN=APOA1 PE=1 SV=2	P08250|APOA1_CHICK	K.VM(+15.99)EQLSNLR.E	Y	36.65	1104.56	9	0.6	553.288	2	17.17		F12:202	2	219	227	Oxidation (M)	M2:Oxidation (M):1000.00
Sample 2	2	4	Collagen alpha-1(I) chain OS=Gallus gallus GN=COL1A1 PE=1 SV=3	P02457|CO1A1_CHICK	R.GFP(+15.99)GADGIAGPKGPP(+15.99)GER.G	Y	41.99	1710.83	18	1.1	856.424	2	17.47		F12:211	1	483	500	Oxidation or Hydroxylation	P3:Oxidation or Hydroxylation:14.02;P15:Oxidation or Hydroxylation:0.00
Sample 2	1	1	Collagen alpha-2(I) chain OS=Gallus gallus GN=COL1A2 PE=4 SV=1	tr|F1P0H9|F1P0H9_CHICK	A.GATGEP(+15.99)GPLGVSGPPGAR(+15.99).G	Y	34.54	1607.79	18	1.1	804.903	2	17.49		F12:212	2	888	905	Oxidation or Hydroxylation	P6:Oxidation or Hydroxylation:0.00;R18:Oxidation or Hydroxylation:0.00
Sample 2	2	4	Collagen alpha-1(I) chain OS=Gallus gallus GN=COL1A1 PE=1 SV=3	P02457|CO1A1_CHICK	K.GSP(+15.99)GADGPIGAP(+15.99)GTP(+15.99)GPQGIAGQR.G	Y	31.01	2162.04	24	1.5	1082.03	2	17.71		F12:219	2	924	947	Oxidation or Hydroxylation	P3:Oxidation or Hydroxylation:0.00;P12:Oxidation or Hydroxylation:23.70;P15:Oxidation or Hydroxylation:6.59
Sample 2	1	1	Collagen alpha-2(I) chain OS=Gallus gallus GN=COL1A2 PE=4 SV=1	tr|F1P0H9|F1P0H9_CHICK	R.GPP(+15.99)GPSGPPGKDGRN(+.98)GLP(+15.99)GPIGPAGVR.G	Y	35.33	2493.27	27	0.5	624.326	4	17.79		F12:222	2	1053	1079	Oxidation or Hydroxylation; Deamidation (NQ)	P3:Oxidation or Hydroxylation:12.28;N15:Deamidation (NQ):1000.00;P18:Oxidation or Hydroxylation:13.45
Sample 2	1	1	Collagen alpha-2(I) chain OS=Gallus gallus GN=COL1A2 PE=4 SV=1	tr|F1P0H9|F1P0H9_CHICK	K.GEIGPAGNVGPTGPAGPR.G	Y	57.36	1602.81	18	1.1	802.414	2	17.91		F12:225	2	264	281
Sample 2	28	4101	Collagen alpha-1(III) chain (Fragments) OS=Gallus gallus GN=COL3A1 PE=2 SV=2	P12105|CO3A1_CHICK	R.GNVGPIGPP(+15.99)GPAGPPGDKGETGP(+15.99)AGAPGP(+15.99)AGSR.G	Y	23.27	2893.4	33	5.6	965.478	3	18.17		F12:233	1	761	793	Oxidation or Hydroxylation	P9:Oxidation or Hydroxylation:17.01;P23:Oxidation or Hydroxylation:0.00;P29:Oxidation or Hydroxylation:0.00
Sample 2	28	13417	Uncharacterized protein (Fragment) OS=Gallus gallus GN=COL3A1 PE=2 SV=1	tr|Q90612|Q90612_CHICK	R.GNVGPIGPP(+15.99)GPAGPPGDKGETGP(+15.99)AGAPGP(+15.99)AGSR.G	Y	23.27	2893.4	33	5.6	965.478	3	18.17		F12:233	1	185	217	Oxidation or Hydroxylation	P9:Oxidation or Hydroxylation:17.01;P23:Oxidation or Hydroxylation:0.00;P29:Oxidation or Hydroxylation:0.00
Sample 2	2	4	Collagen alpha-1(I) chain OS=Gallus gallus GN=COL1A1 PE=1 SV=3	P02457|CO1A1_CHICK	K.GATGAP(+15.99)GIAGAP(+15.99)GFPGAR(+15.99).G	Y	42.3	1571.77	18	1.4	786.893	2	18.55		F12:246	1	387	404	Oxidation or Hydroxylation	P6:Oxidation or Hydroxylation:89.48;P12:Oxidation or Hydroxylation:20.41;R18:Oxidation or Hydroxylation:0.00
Sample 2	2	4	Collagen alpha-1(I) chain OS=Gallus gallus GN=COL1A1 PE=1 SV=3	P02457|CO1A1_CHICK	R.GPP(+15.99)GPMGPP(+15.99)GLAGPP(+15.99)GEAGR.E	Y	48.86	1815.86	20	1.5	908.937	2	18.67		F12:250	1	984	1003	Oxidation or Hydroxylation	P3:Oxidation or Hydroxylation:12.28;P9:Oxidation or Hydroxylation:27.96;P15:Oxidation or Hydroxylation:12.28
Sample 2	2	4	Collagen alpha-1(I) chain OS=Gallus gallus GN=COL1A1 PE=1 SV=3	P02457|CO1A1_CHICK	R.GLTGPIGP(+15.99)PGPAGAP(+15.99)GDKGEAGPP(+15.99)GPAGPTGAR.G	Y	32.69	2878.42	33	2.2	960.483	3	18.91		F12:258	1	753	785	Oxidation or Hydroxylation	P8:Oxidation or Hydroxylation:0.00;P15:Oxidation or Hydroxylation:0.00;P24:Oxidation or Hydroxylation:11.06
Sample 2	1	1	Collagen alpha-2(I) chain OS=Gallus gallus GN=COL1A2 PE=4 SV=1	tr|F1P0H9|F1P0H9_CHICK	R.GDAGPP(+15.99)GMTGFP(+15.99)GAAGR.V	Y	55.84	1546.68	17	0.7	774.35	2	19.39		F12:274	3	777	793	Oxidation or Hydroxylation	P6:Oxidation or Hydroxylation:30.46;P12:Oxidation or Hydroxylation:30.46
Sample 2	1	1	Collagen alpha-2(I) chain OS=Gallus gallus GN=COL1A2 PE=4 SV=1	tr|F1P0H9|F1P0H9_CHICK	G.LPGEY(sub S)GAVGPAGPIGSR.G	Y	24.47	1596.83	17	-3	799.418	2	19.5		F12:278	1	592	608	Mutation
Sample 2	1	1	Collagen alpha-2(I) chain OS=Gallus gallus GN=COL1A2 PE=4 SV=1	tr|F1P0H9|F1P0H9_CHICK	K.GETGPAGPP(+15.99)GFQGLP(+15.99)GPSGPAGEAGKPGER(+15.99).G	Y	48.32	2776.31	30	1	926.443	3	19.63		F12:282	3	543	572	Oxidation or Hydroxylation	P9:Oxidation or Hydroxylation:42.68;P15:Oxidation or Hydroxylation:26.31;R30:Oxidation or Hydroxylation:17.73
Sample 2	2	4	Collagen alpha-1(I) chain OS=Gallus gallus GN=COL1A1 PE=1 SV=3	P02457|CO1A1_CHICK	R.GFP(+15.99)GLP(+15.99)GPSGEP(+15.99)GK.Q	Y	26.19	1343.64	14	1	672.826	2	19.98		F12:293	2	960	973	Oxidation or Hydroxylation	P3:Oxidation or Hydroxylation:14.02;P6:Oxidation or Hydroxylation:32.28;P12:Oxidation or Hydroxylation:5.99
Sample 2	2	4	Collagen alpha-1(I) chain OS=Gallus gallus GN=COL1A1 PE=1 SV=3	P02457|CO1A1_CHICK	R.GFSGLQGPP(+15.99)GPP(+15.99)GAP(+15.99)GEQGPSGASGPAGPR.G	Y	46.85	2688.25	30	2.1	1345.14	2	20.01		F12:294	5	1101	1130	Oxidation or Hydroxylation	P9:Oxidation or Hydroxylation:17.01;P12:Oxidation or Hydroxylation:61.69;P15:Oxidation or Hydroxylation:42.89
Sample 2	1	1	Collagen alpha-2(I) chain OS=Gallus gallus GN=COL1A2 PE=4 SV=1	tr|F1P0H9|F1P0H9_CHICK	R.VGPIGPAGNRGEP(+15.99)GNIGFP(+15.99)GPK.G	Y	36.67	2119.08	22	1	707.368	3	20.04		F12:295	2	476	497	Oxidation or Hydroxylation	P13:Oxidation or Hydroxylation:26.31;P19:Oxidation or Hydroxylation:8.22
Sample 2	1	1	Collagen alpha-2(I) chain OS=Gallus gallus GN=COL1A2 PE=4 SV=1	tr|F1P0H9|F1P0H9_CHICK	K.GETGPAGPPGF(+15.99)QGLP(+15.99)GPSGPAGEAGKPGER(+15.99).G	Y	34.78	2776.31	30	1.2	926.443	3	20.06		F12:296	1	543	572	Oxidation or Hydroxylation	F11:Oxidation or Hydroxylation:0.00;P15:Oxidation or Hydroxylation:14.04;R30:Oxidation or Hydroxylation:0.00
Sample 2	1	1	Collagen alpha-2(I) chain OS=Gallus gallus GN=COL1A2 PE=4 SV=1	tr|F1P0H9|F1P0H9_CHICK	R.VGPIGPAGNRGEPGN(+15.99)IGFP(+15.99)GPK.G	Y	32.4	2119.08	22	1.4	1060.55	2	20.28		F12:302	2	476	497	Oxidation or Hydroxylation	N15:Oxidation or Hydroxylation:11.10;P19:Oxidation or Hydroxylation:0.00
Sample 2	1	1	Collagen alpha-2(I) chain OS=Gallus gallus GN=COL1A2 PE=4 SV=1	tr|F1P0H9|F1P0H9_CHICK	K.GPK(+15.99)GETGPTGAIGPIGASGPP(+15.99)GPVGAAGPAGPR.G	Y	50.83	2836.45	33	1.3	946.491	3	20.5		F12:309	2	744	776	Oxidation or Hydroxylation	K3:Oxidation or Hydroxylation:0.00;P21:Oxidation or Hydroxylation:64.00
Sample 2	1	1	Collagen alpha-2(I) chain OS=Gallus gallus GN=COL1A2 PE=4 SV=1	tr|F1P0H9|F1P0H9_CHICK	R.GLPGESGAVGPAGP(+15.99)IGS(-18.01)R.G	Y	23.91	1575.8	18	1.4	788.909	2	20.61		F12:313	1	591	608	Oxidation or Hydroxylation; Dehydration	P14:Oxidation or Hydroxylation:0.00;S17:Dehydration:42.92
Sample 2	2	4	Collagen alpha-1(I) chain OS=Gallus gallus GN=COL1A1 PE=1 SV=3	P02457|CO1A1_CHICK	R.GFSGLQGP(+15.99)PGPPGAP(+15.99)GEQGPSGASGPAGPR.G	Y	28.14	2672.26	30	1.4	891.761	3	20.67		F12:315	1	1101	1130	Oxidation or Hydroxylation	P8:Oxidation or Hydroxylation:0.00;P15:Oxidation or Hydroxylation:28.36
Sample 2	1	1	Collagen alpha-2(I) chain OS=Gallus gallus GN=COL1A2 PE=4 SV=1	tr|F1P0H9|F1P0H9_CHICK	K.GAAGLP(+15.99)GVAGAP(+15.99)GLPGP(+15.99)R.G	Y	36.78	1561.82	18	1.1	781.919	2	20.79		F12:319	2	309	326	Oxidation or Hydroxylation	P6:Oxidation or Hydroxylation:85.33;P12:Oxidation or Hydroxylation:19.05;P17:Oxidation or Hydroxylation:0.00
Sample 2	4	8	SPARC OS=Gallus gallus GN=SPARC PE=4 SV=1	tr|F1P291|F1P291_CHICK	R.FFEAC(+57.02).D	Y	19.35	672.258	5	0.3	673.265	1	20.94		F12:324	2	264	268	Carbamidomethylation	C5:Carbamidomethylation:1000.00
Sample 2	4	9	SPARC OS=Gallus gallus GN=SPARC PE=2 SV=1	P36377|SPRC_CHICK	R.FFEAC(+57.02).D	Y	19.35	672.258	5	0.3	673.265	1	20.94		F12:324	2	264	268	Carbamidomethylation	C5:Carbamidomethylation:1000.00
Sample 2	4	8	SPARC OS=Gallus gallus GN=SPARC PE=4 SV=1	tr|F1P291|F1P291_CHICK	K.LHLDYIGPC(+57.02)K.F	Y	47.55	1214.61	10	0.7	608.313	2	21.09		F12:327	2	136	145	Carbamidomethylation	C9:Carbamidomethylation:1000.00
Sample 2	4	9	SPARC OS=Gallus gallus GN=SPARC PE=2 SV=1	P36377|SPRC_CHICK	K.LHLDYIGPC(+57.02)K.F	Y	47.55	1214.61	10	0.7	608.313	2	21.09		F12:327	2	136	145	Carbamidomethylation	C9:Carbamidomethylation:1000.00
Sample 2	3	6	Apolipoprotein A-I OS=Gallus gallus GN=APOA1 PE=1 SV=2	P08250|APOA1_CHICK	K.ASGKDAIAQFESS.A	Y	38.8	1309.62	13	0.5	655.815	2	21.12		F12:328	2	47	59
Sample 2	3	6	Apolipoprotein A-I OS=Gallus gallus GN=APOA1 PE=1 SV=2	P08250|APOA1_CHICK	K.NLAPYSDELR.Q	Y	34.57	1176.58	10	0.6	589.296	2	21.15		F12:329	3	185	194
Sample 2	2	4	Collagen alpha-1(I) chain OS=Gallus gallus GN=COL1A1 PE=1 SV=3	P02457|CO1A1_CHICK	K.DGLNGLP(+15.99)GPIGP(+15.99)PGPR(+15.99).G	Y	32.53	1560.79	16	0.5	781.402	2	21.18		F12:330	1	1142	1157	Oxidation or Hydroxylation	P7:Oxidation or Hydroxylation:26.31;P12:Oxidation or Hydroxylation:0.00;R16:Oxidation or Hydroxylation:0.00
Sample 2	12	2181	Uncharacterized protein OS=Gallus gallus GN=LECT2 PE=4 SV=2	tr|F1NEF7|F1NEF7_CHICK	K.FFHNGNAIDDGVQIR(-.98).G	Y	21.64	1700.84	15	2.4	851.428	2	21.74		F12:348	1	244	258	Amidation	R15:Amidation:1000.00
Sample 2	12	2182	Myeloid protein 1 OS=Gallus gallus GN=MIM1 PE=1 SV=2	P08940|MIM1_CHICK	K.FFHNGNAIDDGVQIR(-.98).G	Y	21.64	1700.84	15	2.4	851.428	2	21.74		F12:348	1	244	258	Amidation	R15:Amidation:1000.00
Sample 2	3	6	Apolipoprotein A-I OS=Gallus gallus GN=APOA1 PE=1 SV=2	P08250|APOA1_CHICK	K.W(+29.97)TEELEQYR.Q	Y	24.53	1282.55	9	0	642.28	2	22.17		F12:361	1	131	139	Quinone	W1:Quinone:104.80
Sample 2	18	13408	Uncharacterized protein OS=Gallus gallus GN=ACTBL2 PE=3 SV=2	tr|F1N8P3|F1N8P3_CHICK	R.AVFPSIVGRPR.H	Y	21.29	1197.7	11	1	599.857	2	22.44		F12:370	1	31	41
Sample 2	3	6	Apolipoprotein A-I OS=Gallus gallus GN=APOA1 PE=1 SV=2	P08250|APOA1_CHICK	K.LADNLDTLSAAAAK.L	Y	47.33	1372.72	14	0.8	687.368	2	22.51		F12:372	3	69	82
Sample 2	7	2	Serum albumin OS=Gallus gallus GN=ALB PE=4 SV=2	tr|F2Z4L6|F2Z4L6_CHICK	R.MMSNLC(+57.02)SQQDVFSGK.I	N	32.35	1730.74	15	0.8	866.379	2	22.82		F12:382	2	238	252	Carbamidomethylation	C6:Carbamidomethylation:1000.00
Sample 2	6	3	Serum albumin OS=Gallus gallus GN=ALB PE=1 SV=2	P19121|ALBU_CHICK	R.MMSNLC(+57.02)SQQDVFSGK.I	N	32.35	1730.74	15	0.8	866.379	2	22.82		F12:382	2	288	302	Carbamidomethylation	C6:Carbamidomethylation:1000.00
Sample 2	8	19	Uncharacterized protein OS=Gallus gallus GN=SERPINF1 PE=3 SV=1	tr|E1C7H6|E1C7H6_CHICK	R.TVLKDFHLDEDRTVQVS.M	Y	26.35	2001.02	17	1.2	668.014	3	22.93		F12:385	1	229	245
Sample 2	7	2	Serum albumin OS=Gallus gallus GN=ALB PE=4 SV=2	tr|F2Z4L6|F2Z4L6_CHICK	K.TN(sub D)NPAEC(+57.02)YANAQEQLNQHIK.E	N	12.54	2342.07	20	-5.5	781.693	3	23.14		F12:391	1	341	360	Carbamidomethylation; Mutation	C7:Carbamidomethylation:1000.00
Sample 2	6	3	Serum albumin OS=Gallus gallus GN=ALB PE=1 SV=2	P19121|ALBU_CHICK	K.TN(sub D)NPAEC(+57.02)YANAQEQLNQHIK.E	N	12.54	2342.07	20	-5.5	781.693	3	23.14		F12:391	1	391	410	Carbamidomethylation; Mutation	C7:Carbamidomethylation:1000.00
Sample 2	4	8	SPARC OS=Gallus gallus GN=SPARC PE=4 SV=1	tr|F1P291|F1P291_CHICK	K.RLEAGDHTVELL.A	Y	27.51	1351.71	12	0.4	676.862	2	23.43		F12:400	2	200	211
Sample 2	4	9	SPARC OS=Gallus gallus GN=SPARC PE=2 SV=1	P36377|SPRC_CHICK	K.RLEAGDHTVELL.A	Y	27.51	1351.71	12	0.4	676.862	2	23.43		F12:400	2	200	211
Sample 2	1	1	Collagen alpha-2(I) chain OS=Gallus gallus GN=COL1A2 PE=4 SV=1	tr|F1P0H9|F1P0H9_CHICK	D.P(+175.04)GPVGPVGPAGAFGPR.G	Y	45.06	1606.8	16	9.5	804.417	2	23.77		F12:411	2	980	995	Naphthalene-2 3-dicarboxaldehyde	P1:Naphthalene-2 3-dicarboxaldehyde:1000.00
Sample 2	22	28	Histone H2A-III OS=Gallus gallus PE=1 SV=2	P35062|H2A3_CHICK	R.AGLQFPVGR.V	Y	40.67	943.524	9	0.8	472.77	2	23.88		F12:415	1	22	30
Sample 2	22	29	Histone H2A-IV OS=Gallus gallus PE=1 SV=2	P02263|H2A4_CHICK	R.AGLQFPVGR.V	Y	40.67	943.524	9	0.8	472.77	2	23.88		F12:415	1	22	30
Sample 2	22	30	Histone H2A OS=Gallus gallus GN=H2A-VI PE=3 SV=2	tr|Q92069|Q92069_CHICK	R.AGLQFPVGR.V	Y	40.67	943.524	9	0.8	472.77	2	23.88		F12:415	1	22	30
Sample 2	22	31	Histone H2A.J OS=Gallus gallus GN=H2A-IX PE=3 SV=1	P70082|H2AJ_CHICK	R.AGLQFPVGR.V	Y	40.67	943.524	9	0.8	472.77	2	23.88		F12:415	1	22	30
Sample 2	22	32	Histone H2A (Fragment) OS=Gallus gallus GN=LOC101751709 PE=3 SV=1	tr|R4GJP9|R4GJP9_CHICK	R.AGLQFPVGR.V	Y	40.67	943.524	9	0.8	472.77	2	23.88		F12:415	1	22	30
Sample 2	22	33	Histone H2A OS=Gallus gallus GN=H2AFX PE=3 SV=1	tr|R4GJN7|R4GJN7_CHICK	R.AGLQFPVGR.V	Y	40.67	943.524	9	0.8	472.77	2	23.88		F12:415	1	22	30
Sample 2	22	58	Histone H2A (Fragment) OS=Gallus gallus PE=3 SV=1	tr|Q788R4|Q788R4_CHICK	R.AGLQFPVGR.V	Y	40.67	943.524	9	0.8	472.77	2	23.88		F12:415	1	22	30
Sample 2	22	59	Histone H2A (Fragment) OS=Gallus gallus PE=3 SV=1	tr|Q92064|Q92064_CHICK	R.AGLQFPVGR.V	Y	40.67	943.524	9	0.8	472.77	2	23.88		F12:415	1	22	30
Sample 2	22	60	Histone H2A (Fragment) OS=Gallus gallus PE=3 SV=1	tr|Q788R3|Q788R3_CHICK	R.AGLQFPVGR.V	Y	40.67	943.524	9	0.8	472.77	2	23.88		F12:415	1	22	30
Sample 2	22	61	Histone H2A OS=Gallus gallus GN=H2AFV PE=3 SV=2	tr|F2Z4M5|F2Z4M5_CHICK	R.AGLQFPVGR.I	Y	40.67	943.524	9	0.8	472.77	2	23.88		F12:415	1	24	32
Sample 2	22	62	Histone H2A.V OS=Gallus gallus GN=H2AFV PE=1 SV=2	P02272|H2AV_CHICK	R.AGLQFPVGR.I	Y	40.67	943.524	9	0.8	472.77	2	23.88		F12:415	1	24	32
Sample 2	22	63	Histone H2A.Z OS=Gallus gallus GN=H2AFZ PE=1 SV=3	Q5ZMD6|H2AZ_CHICK	R.AGLQFPVGR.I	Y	40.67	943.524	9	0.8	472.77	2	23.88		F12:415	1	24	32
Sample 2	22	64	Histone H2A OS=Gallus gallus PE=3 SV=2	tr|E1BVN0|E1BVN0_CHICK	L.AGLQFPVGR.V	Y	40.67	943.524	9	0.8	472.77	2	23.88		F12:415	1	23	31
Sample 2	22	65	Histone H2A (Fragment) OS=Gallus gallus GN=Gga.24422 PE=3 SV=2	tr|F1P5G5|F1P5G5_CHICK	L.AGLQFPVGR.V	Y	40.67	943.524	9	0.8	472.77	2	23.88		F12:415	1	32	40
Sample 2	12	2181	Uncharacterized protein OS=Gallus gallus GN=LECT2 PE=4 SV=2	tr|F1NEF7|F1NEF7_CHICK	K.FFHN(+.98)GNAIDDGVQIR.G	Y	32.26	1702.81	15	0.4	568.61	3	24.13		F12:423	1	244	258	Deamidation (NQ)	N4:Deamidation (NQ):5.03
Sample 2	12	2182	Myeloid protein 1 OS=Gallus gallus GN=MIM1 PE=1 SV=2	P08940|MIM1_CHICK	K.FFHN(+.98)GNAIDDGVQIR.G	Y	32.26	1702.81	15	0.4	568.61	3	24.13		F12:423	1	244	258	Deamidation (NQ)	N4:Deamidation (NQ):5.03
Sample 2	1	1	Collagen alpha-2(I) chain OS=Gallus gallus GN=COL1A2 PE=4 SV=1	tr|F1P0H9|F1P0H9_CHICK	R.GLP(+15.99)GIAGATGEP(+15.99)GPLGVSGP(+15.99)PGAR.G	Y	42.56	2132.09	24	1.3	1067.05	2	24.26		F12:426	2	882	905	Oxidation or Hydroxylation	P3:Oxidation or Hydroxylation:99.02;P12:Oxidation or Hydroxylation:17.01;P20:Oxidation or Hydroxylation:0.00
Sample 2	1	1	Collagen alpha-2(I) chain OS=Gallus gallus GN=COL1A2 PE=4 SV=1	tr|F1P0H9|F1P0H9_CHICK	R.GLP(+15.99)GIAGATGEPGP(+15.99)LGVSGP(+15.99)PGAR.G	Y	21.11	2132.09	24	0.4	711.703	3	24.29		F12:427	1	882	905	Oxidation or Hydroxylation	P3:Oxidation or Hydroxylation:62.82;P14:Oxidation or Hydroxylation:9.40;P20:Oxidation or Hydroxylation:0.00
Sample 2	12	2181	Uncharacterized protein OS=Gallus gallus GN=LECT2 PE=4 SV=2	tr|F1NEF7|F1NEF7_CHICK	R.VFPGIISHIHVENC(+57.02)DR.S	Y	34.12	1891.94	16	1.2	631.653	3	24.35		F12:429	2	293	308	Carbamidomethylation	C14:Carbamidomethylation:1000.00
Sample 2	12	2182	Myeloid protein 1 OS=Gallus gallus GN=MIM1 PE=1 SV=2	P08940|MIM1_CHICK	R.VFPGIISHIHVENC(+57.02)DR.S	Y	34.12	1891.94	16	1.2	631.653	3	24.35		F12:429	2	293	308	Carbamidomethylation	C14:Carbamidomethylation:1000.00
Sample 2	9	7877	Hemoglobin subunit beta OS=Gallus gallus GN=HBB PE=1 SV=2	P02112|HBB_CHICK	F.GNLSSPTAILGNP(+15.99)MVR.A	Y	30.06	1641.85	16	1.7	821.934	2	24.59		F12:435	1	47	62	Oxidation or Hydroxylation	P13:Oxidation or Hydroxylation:0.00
Sample 2	3	6	Apolipoprotein A-I OS=Gallus gallus GN=APOA1 PE=1 SV=2	P08250|APOA1_CHICK	K.DAIAQFESSAVGK.Q	Y	34.61	1321.65	13	0.7	661.833	2	24.91		F12:444	1	51	63
Sample 2	4	8	SPARC OS=Gallus gallus GN=SPARC PE=4 SV=1	tr|F1P291|F1P291_CHICK	G.I(+57.02)KEQDIDKDLVI	Y	28.04	1484.81	12	0.9	743.412	2	24.94		F12:445	1	287	298	Carbamidomethylation (DHKE X@N-term)	I1:Carbamidomethylation (DHKE X@N-term):12.28
Sample 2	4	9	SPARC OS=Gallus gallus GN=SPARC PE=2 SV=1	P36377|SPRC_CHICK	G.I(+57.02)KEQDIDKDLVI	Y	28.04	1484.81	12	0.9	743.412	2	24.94		F12:445	1	287	298	Carbamidomethylation (DHKE X@N-term)	I1:Carbamidomethylation (DHKE X@N-term):12.28
Sample 2	7	2	Serum albumin OS=Gallus gallus GN=ALB PE=4 SV=2	tr|F2Z4L6|F2Z4L6_CHICK	K.KMPQVPTDLLLETGKK.M	N	38.73	1797.01	16	0.8	600.01	3	25.03		F12:448	2	392	407
Sample 2	6	3	Serum albumin OS=Gallus gallus GN=ALB PE=1 SV=2	P19121|ALBU_CHICK	K.KMPQVPTDLLLETGKK.M	N	38.73	1797.01	16	0.8	600.01	3	25.03		F12:448	2	442	457
Sample 2	10	10	Decorin OS=Gallus gallus GN=DCN PE=1 SV=1	P28675|PGS2_CHICK	S.GFGPVC(+57.02)PFR.C	Y	38.05	1035.5	9	0.8	518.756	2	25.36		F12:457	1	47	55	Carbamidomethylation	C6:Carbamidomethylation:1000.00
Sample 2	10	11	Decorin OS=Gallus gallus GN=DCN PE=4 SV=2	tr|E1BRE9|E1BRE9_CHICK	S.GFGPVC(+57.02)PFR.C	Y	38.05	1035.5	9	0.8	518.756	2	25.36		F12:457	1	47	55	Carbamidomethylation	C6:Carbamidomethylation:1000.00
Sample 2	3	6	Apolipoprotein A-I OS=Gallus gallus GN=APOA1 PE=1 SV=2	P08250|APOA1_CHICK	K.IRPF(+15.99)LDQFSAK.W	Y	32.49	1336.71	11	1.3	669.365	2	25.77		F12:468	1	120	130	Oxidation or Hydroxylation	F4:Oxidation or Hydroxylation:0.00
Sample 2	7	2	Serum albumin OS=Gallus gallus GN=ALB PE=4 SV=2	tr|F2Z4L6|F2Z4L6_CHICK	K.QQYFC(+57.02)GILK.Q	N	41.2	1155.57	9	1	578.795	2	25.88		F12:471	3	174	182	Carbamidomethylation	C5:Carbamidomethylation:1000.00
Sample 2	6	3	Serum albumin OS=Gallus gallus GN=ALB PE=1 SV=2	P19121|ALBU_CHICK	K.QQYFC(+57.02)GILK.Q	N	41.2	1155.57	9	1	578.795	2	25.88		F12:471	3	224	232	Carbamidomethylation	C5:Carbamidomethylation:1000.00
Sample 2	15	39	Histone H2B 8 OS=Gallus gallus GN=H2B-VIII PE=1 SV=3	Q9PSW9|H2B8_CHICK	R.LLLPGELAK.H	Y	16.39	952.596	9	0.5	477.305	2	25.91		F12:472	2	101	109
Sample 2	15	40	Histone H2B 5 OS=Gallus gallus GN=H2B-V PE=1 SV=2	P0C1H4|H2B5_CHICK	R.LLLPGELAK.H	Y	16.39	952.596	9	0.5	477.305	2	25.91		F12:472	2	101	109
Sample 2	15	41	Histone H2B 1/2/3/4/6 OS=Gallus gallus GN=H2B-I PE=1 SV=2	P0C1H3|H2B1_CHICK	R.LLLPGELAK.H	Y	16.39	952.596	9	0.5	477.305	2	25.91		F12:472	2	101	109
Sample 2	15	42	Histone H2B (Fragment) OS=Gallus gallus GN=HIST1H2B5L PE=3 SV=1	tr|A0A0A0MQ64|A0A0A0MQ64_CHICK	R.LLLPGELAK.H	Y	16.39	952.596	9	0.5	477.305	2	25.91		F12:472	2	118	126
Sample 2	4	8	SPARC OS=Gallus gallus GN=SPARC PE=4 SV=1	tr|F1P291|F1P291_CHICK	K.EQDIDKDLVI	Y	20.18	1186.61	10	0.6	594.312	2	26.23		F12:481	3	289	298
Sample 2	4	9	SPARC OS=Gallus gallus GN=SPARC PE=2 SV=1	P36377|SPRC_CHICK	K.EQDIDKDLVI	Y	20.18	1186.61	10	0.6	594.312	2	26.23		F12:481	3	289	298
Sample 2	1	1	Collagen alpha-2(I) chain OS=Gallus gallus GN=COL1A2 PE=4 SV=1	tr|F1P0H9|F1P0H9_CHICK	R.AYC(+57.02)DFATGETC(+57.02)IHASLEDIPTK.T	Y	41.45	2498.11	22	1.5	833.712	3	26.29		F12:483	2	1188	1209	Carbamidomethylation	C3:Carbamidomethylation:1000.00;C11:Carbamidomethylation:1000.00
Sample 2	5	7	Uncharacterized protein OS=Gallus gallus GN=AHSG PE=4 SV=1	tr|E1BZE1|E1BZE1_CHICK	K.LQKVN(+.98)GQFSVL.A	Y	20.22	1232.68	11	0.8	617.346	2	26.77		F12:494	2	115	125	Deamidation (NQ)	N5:Deamidation (NQ):11.10
Sample 2	16	35	Lumican OS=Gallus gallus GN=LUM PE=1 SV=1	P51890|LUM_CHICK	R.ADLPQEMYNC(+57.02)LR.V	Y	43.85	1508.68	12	1.4	755.346	2	27.02		F12:500	1	324	335	Carbamidomethylation	C10:Carbamidomethylation:1000.00
Sample 2	7	2	Serum albumin OS=Gallus gallus GN=ALB PE=4 SV=2	tr|F2Z4L6|F2Z4L6_CHICK	K.KMPQVPTDLLLETGK.K	N	12.9	1668.91	15	1.1	557.312	3	27.31		F12:504	1	392	406
Sample 2	6	3	Serum albumin OS=Gallus gallus GN=ALB PE=1 SV=2	P19121|ALBU_CHICK	K.KMPQVPTDLLLETGK.K	N	12.9	1668.91	15	1.1	557.312	3	27.31		F12:504	1	442	456
Sample 2	21	13409	Prothrombin OS=Gallus gallus PE=2 SV=1	tr|Q91001|Q91001_CHICK	K.RPVIFSDYIHPVC(+57.02)LPTK.E	Y	32.48	2041.08	17	0.8	681.369	3	27.45		F12:507	2	457	473	Carbamidomethylation	C13:Carbamidomethylation:1000.00
Sample 2	21	13410	Prothrombin OS=Gallus gallus GN=F2 PE=3 SV=1	tr|F1NXV6|F1NXV6_CHICK	K.RPVIFSDYIHPVC(+57.02)LPTK.E	Y	32.48	2041.08	17	0.8	681.369	3	27.45		F12:507	2	457	473	Carbamidomethylation	C13:Carbamidomethylation:1000.00
Sample 2	12	2181	Uncharacterized protein OS=Gallus gallus GN=LECT2 PE=4 SV=2	tr|F1NEF7|F1NEF7_CHICK	K.HKGVDVIC(+57.02)ADGATVYAPF.S	Y	17.77	1918.92	18	0.3	960.47	2	27.55		F12:510	1	217	234	Carbamidomethylation	C8:Carbamidomethylation:1000.00
Sample 2	12	2182	Myeloid protein 1 OS=Gallus gallus GN=MIM1 PE=1 SV=2	P08940|MIM1_CHICK	K.HKGVDVIC(+57.02)ADGATVYAPF.S	Y	17.77	1918.92	18	0.3	960.47	2	27.55		F12:510	1	217	234	Carbamidomethylation	C8:Carbamidomethylation:1000.00
Sample 2	4	8	SPARC OS=Gallus gallus GN=SPARC PE=4 SV=1	tr|F1P291|F1P291_CHICK	K.NVLITLYER.D	Y	38.55	1119.63	9	0.6	560.822	2	27.69		F12:513	1	168	176
Sample 2	4	9	SPARC OS=Gallus gallus GN=SPARC PE=2 SV=1	P36377|SPRC_CHICK	K.NVLITLYER.D	Y	38.55	1119.63	9	0.6	560.822	2	27.69		F12:513	1	168	176
Sample 2	3	6	Apolipoprotein A-I OS=Gallus gallus GN=APOA1 PE=1 SV=2	P08250|APOA1_CHICK	R.EM(+15.99)WLKDTEALRAELTK.D	Y	49.06	1948.99	16	0.9	650.672	3	27.84		F12:517	1	96	111	Oxidation (M)	M2:Oxidation (M):1000.00
Sample 2	18	13408	Uncharacterized protein OS=Gallus gallus GN=ACTBL2 PE=3 SV=2	tr|F1N8P3|F1N8P3_CHICK	K.SYELPDGQVITIGNER.F	Y	32.88	1789.88	16	2.7	895.952	2	27.98		F12:521	1	241	256
Sample 2	2	4	Collagen alpha-1(I) chain OS=Gallus gallus GN=COL1A1 PE=1 SV=3	P02457|CO1A1_CHICK	K.ALLLQGANEIEIR.A	Y	45.61	1438.81	13	1.3	720.415	2	28.13		F12:525	3	1376	1388
Sample 2	5	7	Uncharacterized protein OS=Gallus gallus GN=AHSG PE=4 SV=1	tr|E1BZE1|E1BZE1_CHICK	K.NPDVYLM.L	Y	21.59	850.389	7	0.3	851.397	1	28.22		F12:528	1	172	178
Sample 2	1	1	Collagen alpha-2(I) chain OS=Gallus gallus GN=COL1A2 PE=4 SV=1	tr|F1P0H9|F1P0H9_CHICK	K.AADFGPGPMGLMGPR.G	Y	52.17	1472.69	15	1.4	737.354	2	28.45		F12:534	2	84	98
Sample 2	1	1	Collagen alpha-2(I) chain OS=Gallus gallus GN=COL1A2 PE=4 SV=1	tr|F1P0H9|F1P0H9_CHICK	K.AADFGPGPM(+15.99)GLM(+15.99)GPR.G	Y	16.25	1504.68	15	1.5	753.348	2	28.7		F12:540	1	84	98	Oxidation (M)	M9:Oxidation (M):1000.00;M12:Oxidation (M):1000.00
Sample 2	5	7	Uncharacterized protein OS=Gallus gallus GN=AHSG PE=4 SV=1	tr|E1BZE1|E1BZE1_CHICK	K.D(+57.02)NLAACQLLPEDQSNFGFC(+57.02)TAK.M	Y	31.76	2498.12	22	1.4	1250.07	2	29.02		F12:547	2	213	234	Carbamidomethylation (DHKE X@N-term); Carbamidomethylation	D1:Carbamidomethylation (DHKE X@N-term):32.22;C19:Carbamidomethylation:1000.00
Sample 2	1	1	Collagen alpha-2(I) chain OS=Gallus gallus GN=COL1A2 PE=4 SV=1	tr|F1P0H9|F1P0H9_CHICK	K.DMATQLAFMR.L	Y	35.88	1182.55	10	0.8	592.284	2	29.05		F12:548	1	1246	1255
Sample 2	4	8	SPARC OS=Gallus gallus GN=SPARC PE=4 SV=1	tr|F1P291|F1P291_CHICK	K.NVLITLYERDEDNNLLTEK.Q	Y	32.27	2291.16	19	1	1146.59	2	29.27		F12:554	8	168	186
Sample 2	4	9	SPARC OS=Gallus gallus GN=SPARC PE=2 SV=1	P36377|SPRC_CHICK	K.NVLITLYERDEDNNLLTEK.Q	Y	32.27	2291.16	19	1	1146.59	2	29.27		F12:554	8	168	186
Sample 2	5	7	Uncharacterized protein OS=Gallus gallus GN=AHSG PE=4 SV=1	tr|E1BZE1|E1BZE1_CHICK	K.DNLAAC(+57.02)QLLPEDQSNFGFC(+57.02)TAK.M	Y	16.75	2498.12	22	2	1250.07	2	29.3		F12:555	1	213	234	Carbamidomethylation	C6:Carbamidomethylation:1000.00;C19:Carbamidomethylation:1000.00
Sample 2	15	39	Histone H2B 8 OS=Gallus gallus GN=H2B-VIII PE=1 SV=3	Q9PSW9|H2B8_CHICK	M.NSFVNDIFER.I	Y	38.49	1239.59	10	0.5	620.802	2	29.66		F12:564	2	64	73
Sample 2	15	40	Histone H2B 5 OS=Gallus gallus GN=H2B-V PE=1 SV=2	P0C1H4|H2B5_CHICK	M.NSFVNDIFER.I	Y	38.49	1239.59	10	0.5	620.802	2	29.66		F12:564	2	64	73
Sample 2	15	41	Histone H2B 1/2/3/4/6 OS=Gallus gallus GN=H2B-I PE=1 SV=2	P0C1H3|H2B1_CHICK	M.NSFVNDIFER.I	Y	38.49	1239.59	10	0.5	620.802	2	29.66		F12:564	2	64	73
Sample 2	15	42	Histone H2B (Fragment) OS=Gallus gallus GN=HIST1H2B5L PE=3 SV=1	tr|A0A0A0MQ64|A0A0A0MQ64_CHICK	M.NSFVNDIFER.I	Y	38.49	1239.59	10	0.5	620.802	2	29.66		F12:564	2	81	90
Sample 2	10	10	Decorin OS=Gallus gallus GN=DCN PE=1 SV=1	P28675|PGS2_CHICK	F.SNPVQYWEIQPSAFR.C	Y	41.89	1820.88	15	0.7	911.45	2	30.46		F12:580	2	329	343
Sample 2	10	11	Decorin OS=Gallus gallus GN=DCN PE=4 SV=2	tr|E1BRE9|E1BRE9_CHICK	F.SNPVQYWEIQPSAFR.C	Y	41.89	1820.88	15	0.7	911.45	2	30.46		F12:580	2	329	343
Sample 2	8	19	Uncharacterized protein OS=Gallus gallus GN=SERPINF1 PE=3 SV=1	tr|E1C7H6|E1C7H6_CHICK	F.SLATALSGLSLGAGER.T	Y	38.61	1501.81	16	1.4	751.913	2	30.93		F12:590	2	82	97
Sample 2	5	7	Uncharacterized protein OS=Gallus gallus GN=AHSG PE=4 SV=1	tr|E1BZE1|E1BZE1_CHICK	K.ISHNNPVAS(+79.97)ESSSSEFPSLL.S	Y	15.49	2180.96	20	1.5	1091.49	2	30.96		F12:591	1	284	303	Phosphorylation (STY)	S9:Phosphorylation (STY):0.00
Sample 2	1	1	Collagen alpha-2(I) chain OS=Gallus gallus GN=COL1A2 PE=4 SV=1	tr|F1P0H9|F1P0H9_CHICK	R.LSHPEWSSGFYWIDPNQGC(+57.02)TADAIR.A	Y	47.76	2906.31	25	1.5	969.778	3	31.33		F12:597	2	1163	1187	Carbamidomethylation	C19:Carbamidomethylation:1000.00
Sample 2	3	6	Apolipoprotein A-I OS=Gallus gallus GN=APOA1 PE=1 SV=2	P08250|APOA1_CHICK	K.IRPFLDQF.S	Y	29.13	1034.55	8	0.4	518.285	2	31.56		F12:602	2	120	127
Sample 2	8	19	Uncharacterized protein OS=Gallus gallus GN=SERPINF1 PE=3 SV=1	tr|E1C7H6|E1C7H6_CHICK	R.ALSGNTQLDLQEINNWVR.Q	Y	36.62	2070.05	18	1.5	1036.03	2	31.89		F12:608	3	166	183
Sample 2	9	7877	Hemoglobin subunit beta OS=Gallus gallus GN=HBB PE=1 SV=2	P02112|HBB_CHICK	R.FFASF.G	Y	23.11	617.285	5	1.4	618.293	1	32.1		F12:613	3	42	46
Sample 2	3	6	Apolipoprotein A-I OS=Gallus gallus GN=APOA1 PE=1 SV=2	P08250|APOA1_CHICK	R.LISFLDELQK.S	Y	38.84	1204.67	10	0.7	603.343	2	32.17		F12:615	4	252	261
Sample 2	5	7	Uncharacterized protein OS=Gallus gallus GN=AHSG PE=4 SV=1	tr|E1BZE1|E1BZE1_CHICK	K.ISHNNPVAS(+79.97)ES(+79.97)SSSEFPSLL.S	Y	21.36	2260.93	20	1.7	1131.47	2	32.56		F12:624	1	284	303	Phosphorylation (STY)	S9:Phosphorylation (STY):9.42;S11:Phosphorylation (STY):7.21
Sample 2	7	2	Serum albumin OS=Gallus gallus GN=ALB PE=4 SV=2	tr|F2Z4L6|F2Z4L6_CHICK	R.VSFLGHFIYSVAR.R	N	49.73	1494.8	13	1.5	748.408	2	32.63		F12:626	2	110	122
Sample 2	6	3	Serum albumin OS=Gallus gallus GN=ALB PE=1 SV=2	P19121|ALBU_CHICK	R.VSFLGHFIYSVAR.R	N	49.73	1494.8	13	1.5	748.408	2	32.63		F12:626	2	160	172
Sample 2	11	20	Vitronectin OS=Gallus gallus PE=2 SV=1	tr|O12945|O12945_CHICK	R.DISEGFEGIPNDIDAAFALPAHSYHGNER.V	Y	39.84	3141.44	29	1.7	786.369	4	32.9		F12:633	2	240	268
Sample 2	11	21	Uncharacterized protein OS=Gallus gallus GN=VTN PE=4 SV=2	tr|E1C7A7|E1C7A7_CHICK	R.DISEGFEGIPNDIDAAFALPAHSYHGNER.V	Y	39.84	3141.44	29	1.7	786.369	4	32.9		F12:633	2	240	268
Sample 2	9	7877	Hemoglobin subunit beta OS=Gallus gallus GN=HBB PE=1 SV=2	P02112|HBB_CHICK	R.FFASFGNLSSPTAILGNPMVR(+15.99).A	Y	31.56	2241.13	21	1.4	1121.57	2	33.84		F12:653	1	42	62	Oxidation or Hydroxylation	R21:Oxidation or Hydroxylation:0.00
Sample 2	4	8	SPARC OS=Gallus gallus GN=SPARC PE=4 SV=1	tr|F1P291|F1P291_CHICK	K.NYNM(+15.99)YIFPVHWQFGQLDQHPIDGYLSHTELAPLR.A	Y	57.38	4114.98	34	0.8	1029.75	4	33.94		F12:655	3	218	251	Oxidation (M)	M4:Oxidation (M):1000.00
Sample 2	4	9	SPARC OS=Gallus gallus GN=SPARC PE=2 SV=1	P36377|SPRC_CHICK	K.NYNM(+15.99)YIFPVHWQFGQLDQHPIDGYLSHTELAPLR.A	Y	57.38	4114.98	34	0.8	1029.75	4	33.94		F12:655	3	218	251	Oxidation (M)	M4:Oxidation (M):1000.00
Sample 2	5	7	Uncharacterized protein OS=Gallus gallus GN=AHSG PE=4 SV=1	tr|E1BZE1|E1BZE1_CHICK	K.NPDVYLM(+15.99)LLEIGR.A	Y	38.58	1547.8	13	0.9	774.909	2	34.21		F12:661	1	172	184	Oxidation (M)	M7:Oxidation (M):1000.00
Sample 2	8	19	Uncharacterized protein OS=Gallus gallus GN=SERPINF1 PE=3 SV=1	tr|E1C7H6|E1C7H6_CHICK	R.LTFPIEYHVDRPFLLVLR.D	Y	24.08	2227.25	18	0.6	557.821	4	34.26		F12:663	3	385	402
Sample 2	4	8	SPARC OS=Gallus gallus GN=SPARC PE=4 SV=1	tr|F1P291|F1P291_CHICK	K.FIT(sub P)AC(+57.02)LDTELTEFPLR.M	Y	18.67	1924.96	16	6.8	963.494	2	34.6		F12:672	1	146	161	Carbamidomethylation; Mutation	C5:Carbamidomethylation:1000.00
Sample 2	4	9	SPARC OS=Gallus gallus GN=SPARC PE=2 SV=1	P36377|SPRC_CHICK	K.FIT(sub P)AC(+57.02)LDTELTEFPLR.M	Y	18.67	1924.96	16	6.8	963.494	2	34.6		F12:672	1	146	161	Carbamidomethylation; Mutation	C5:Carbamidomethylation:1000.00
Sample 2	14	45	Hemoglobin subunit alpha-A OS=Gallus gallus GN=HBAA PE=1 SV=2	P01994|HBA_CHICK	K.KVVAALIEAANHIDDIAGTLSK.L	Y	47.57	2248.24	22	0.4	750.422	3	35.05		F12:682	2	62	83
Sample 2	4	8	SPARC OS=Gallus gallus GN=SPARC PE=4 SV=1	tr|F1P291|F1P291_CHICK	K.NYNMYIFPVHWQFGQLDQHPIDGYLSHTELAPLR.A	Y	42.46	4098.98	34	0.5	820.804	5	35.1		F12:683	3	218	251
Sample 2	4	9	SPARC OS=Gallus gallus GN=SPARC PE=2 SV=1	P36377|SPRC_CHICK	K.NYNMYIFPVHWQFGQLDQHPIDGYLSHTELAPLR.A	Y	42.46	4098.98	34	0.5	820.804	5	35.1		F12:683	3	218	251
Sample 2	13	36	Uncharacterized protein OS=Gallus gallus GN=OMD PE=4 SV=1	tr|R4GF52|R4GF52_CHICK	R.NTFISLPNLIELNLGHNK.L	Y	39.56	2036.11	18	1.1	1019.06	2	35.21		F12:685	4	274	291
Sample 2	7	2	Serum albumin OS=Gallus gallus GN=ALB PE=4 SV=2	tr|F2Z4L6|F2Z4L6_CHICK	K.C(+57.02)VANEDAPEC(+57.02)SKPLPSIILDEIC(+57.02)QVEK.L	N	21.19	3113.47	27	2	1038.83	3	35.29		F12:687	1	30	56	Carbamidomethylation	C1:Carbamidomethylation:1000.00;C10:Carbamidomethylation:1000.00;C23:Carbamidomethylation:1000.00
Sample 2	6	3	Serum albumin OS=Gallus gallus GN=ALB PE=1 SV=2	P19121|ALBU_CHICK	K.C(+57.02)VANEDAPEC(+57.02)SKPLPSIILDEIC(+57.02)QVEK.L	N	21.19	3113.47	27	2	1038.83	3	35.29		F12:687	1	80	106	Carbamidomethylation	C1:Carbamidomethylation:1000.00;C10:Carbamidomethylation:1000.00;C23:Carbamidomethylation:1000.00
Sample 2	14	45	Hemoglobin subunit alpha-A OS=Gallus gallus GN=HBAA PE=1 SV=2	P01994|HBA_CHICK	K.VVAALIEAANHIDDIAGTLSK.L	Y	44.58	2120.15	21	2	1061.08	2	35.8		F12:697	4	63	83
Sample 2	4	8	SPARC OS=Gallus gallus GN=SPARC PE=4 SV=1	tr|F1P291|F1P291_CHICK	K.NYNM(+15.99)YIFPVHWQF.G	Y	19.42	1773.8	13	1.4	887.907	2	36.97		F12:718	1	218	230	Oxidation (M)	M4:Oxidation (M):1000.00
Sample 2	4	9	SPARC OS=Gallus gallus GN=SPARC PE=2 SV=1	P36377|SPRC_CHICK	K.NYNM(+15.99)YIFPVHWQF.G	Y	19.42	1773.8	13	1.4	887.907	2	36.97		F12:718	1	218	230	Oxidation (M)	M4:Oxidation (M):1000.00
Sample 2	16	35	Lumican OS=Gallus gallus GN=LUM PE=1 SV=1	P51890|LUM_CHICK	K.GLNSLLYLDLSFNQLTK.L	Y	28.64	1938.05	17	1.2	970.032	2	38.68		F12:742	1	187	203
Sample 2	16	35	Lumican OS=Gallus gallus GN=LUM PE=1 SV=1	P51890|LUM_CHICK	K.LPTGLPHSLLMLYFDNNQISNIPDEYFQGFK.T	Y	31.24	3610.78	31	1.3	1204.6	3	39.38		F12:750	1	204	234
Sample 2	25	43	Alpha-1 type XI collagen (Fragment) OS=Gallus gallus PE=2 SV=1	tr|Q90796|Q90796_CHICK	K.FGFEVGPVC(+57.02)FLG	Y	32.07	1327.63	12	0.8	664.821	2	40.29		F12:760	1	877	888	Carbamidomethylation	C9:Carbamidomethylation:1000.00
Sample 2	27	618	Uncharacterized protein OS=Gallus gallus GN=COL11A1 PE=4 SV=2	tr|F1P4K9|F1P4K9_CHICK	R.ILDEEVFEGEIQQLLIIADPR.A	Y	25.31	2439.29	21	1.6	814.105	3	43.28		F12:786	1	213	233
Sample 2	4	8	SPARC OS=Gallus gallus GN=SPARC PE=4 SV=1	tr|F1P291|F1P291_CHICK	E.LAPLR(+21.98).A	Y	13.46	590.352	5	0.1	591.359	1	46.57		F12:828	1	247	251	Sodium adduct	R5:Sodium adduct:1000.00
Sample 2	4	9	SPARC OS=Gallus gallus GN=SPARC PE=2 SV=1	P36377|SPRC_CHICK	E.LAPLR(+21.98).A	Y	13.46	590.352	5	0.1	591.359	1	46.57		F12:828	1	247	251	Sodium adduct	R5:Sodium adduct:1000.00
