# Supplementary material for: Bone protein “extractomics”: comparing the efficiency of bone protein extractions of Gallus gallus in tandem mass spectrometry, with an eye towards paleoproteomics
Source: PeerJ. 2016 Oct 27;4:e2603. doi: 10.7717/peerj.2603 (PMC5088622; doi:10.7717/peerj.2603)
Supplement: Table S18 [file peerj-04-2603-s022.xlsx]

## Sheet: Peptides
Table S18. Peptides identified in samples from Method 3, dialyzed urea (20 mL/g), post-HCl (20-H/Urea-D) @ 1% FDR
Sample #	Protein Group	Protein ID	Protein Description	Protein Accession	Peptide	Unique	-10lgP	Mass	Length	ppm	m/z	z	RT	Area	Scan	#Spec	Start	End	PTM	AScore
Sample 1	2	4	Collagen alpha-1(I) chain OS=Gallus gallus GN=COL1A1 PE=1 SV=3	P02457|CO1A1_CHICK	R.DGAAGPKGDRGETGPAGPP(+15.99)GAPGAP(+15.99)GAP(+15.99)GPVGPAGK.N	Y	25.61	3092.49	36	2.1	1031.84	3	13.18		F27:135	2	1016	1051	Oxidation or Hydroxylation	P19:Oxidation or Hydroxylation:0.00;P25:Oxidation or Hydroxylation:0.00;P28:Oxidation or Hydroxylation:27.42
Sample 1	2	4	Collagen alpha-1(I) chain OS=Gallus gallus GN=COL1A1 PE=1 SV=3	P02457|CO1A1_CHICK	K.GDRGETGPAGP(+15.99)PGAPGAP(+15.99)GAP(+15.99)GPVGPAGK.N	Y	24.5	2496.2	29	1.1	833.075	3	13.64		F27:144	1	1023	1051	Oxidation or Hydroxylation	P11:Oxidation or Hydroxylation:0.00;P18:Oxidation or Hydroxylation:28.36;P21:Oxidation or Hydroxylation:53.33
Sample 1	2	4	Collagen alpha-1(I) chain OS=Gallus gallus GN=COL1A1 PE=1 SV=3	P02457|CO1A1_CHICK	R.GSAGPP(+15.99)GATGFP(+15.99)GAAGR.V	Y	43.91	1458.69	17	1	730.351	2	14.72		F27:169	2	855	871	Oxidation or Hydroxylation	P6:Oxidation or Hydroxylation:12.28;P12:Oxidation or Hydroxylation:14.62
Sample 1	4	66	Alpha 1 type II procollagen (Fragment) OS=Gallus gallus GN=COL2A1 PE=4 SV=1	tr|Q7T2Z7|Q7T2Z7_CHICK	R.GAPGERGEPGM(sub A)PGPAGFAGPP(+15.99)GADGQPGAK(+15.99).G	Y	21.35	2718.25	30	-6.1	907.084	3	15		F27:176	1	601	630	Oxidation or Hydroxylation; Mutation	P21:Oxidation or Hydroxylation:19.27;K30:Oxidation or Hydroxylation:53.33
Sample 1	4	67	Collagen alpha-1(II) chain (Fragment) OS=Gallus gallus GN=COL2A1 PE=4 SV=2	tr|H9L2B7|H9L2B7_CHICK	R.GAPGERGEPGM(sub A)PGPAGFAGPP(+15.99)GADGQPGAK(+15.99).G	Y	21.35	2718.25	30	-6.1	907.084	3	15		F27:176	1	640	669	Oxidation or Hydroxylation; Mutation	P21:Oxidation or Hydroxylation:19.27;K30:Oxidation or Hydroxylation:53.33
Sample 1	4	68	Alpha 1 type IIA collagen OS=Gallus gallus GN=COL2A1 PE=2 SV=1	tr|Q90W37|Q90W37_CHICK	R.GAPGERGEPGM(sub A)PGPAGFAGPP(+15.99)GADGQPGAK(+15.99).G	Y	21.35	2718.25	30	-6.1	907.084	3	15		F27:176	1	752	781	Oxidation or Hydroxylation; Mutation	P21:Oxidation or Hydroxylation:19.27;K30:Oxidation or Hydroxylation:53.33
Sample 1	1	1	Collagen alpha-2(I) chain OS=Gallus gallus GN=COL1A2 PE=4 SV=1	tr|F1P0H9|F1P0H9_CHICK	R.VGN(sub P)P(+15.99)GPAGITGPP(+15.99)GPP(+15.99)GPAGK.D	Y	26.59	1841.93	21	5.2	921.976	2	16.21		F27:208	1	794	814	Oxidation or Hydroxylation; Mutation	P4:Oxidation or Hydroxylation:12.28;P13:Oxidation or Hydroxylation:30.46;P16:Oxidation or Hydroxylation:12.28
Sample 1	1	1	Collagen alpha-2(I) chain OS=Gallus gallus GN=COL1A2 PE=4 SV=1	tr|F1P0H9|F1P0H9_CHICK	R.GLP(+15.99)GAIGAP(+15.99)GPAGGAGDRGEGGPAGPAGPAGAR.G	Y	30.49	2724.33	33	2	1363.18	2	16.43		F27:215	4	675	707	Oxidation or Hydroxylation	P3:Oxidation or Hydroxylation:0.00;P9:Oxidation or Hydroxylation:0.00
Sample 1	2	4	Collagen alpha-1(I) chain OS=Gallus gallus GN=COL1A1 PE=1 SV=3	P02457|CO1A1_CHICK	R.GLTGPIGPP(+15.99)GPAGAP(+15.99)GDKGEAGPP(+15.99)GPAGPTGAR.G	Y	41.15	2878.42	33	1.8	960.483	3	17.33		F27:240	1	753	785	Oxidation or Hydroxylation	P9:Oxidation or Hydroxylation:49.35;P15:Oxidation or Hydroxylation:33.81;P24:Oxidation or Hydroxylation:14.62
Sample 1	2	4	Collagen alpha-1(I) chain OS=Gallus gallus GN=COL1A1 PE=1 SV=3	P02457|CO1A1_CHICK	K.GATGAP(+15.99)GIAGAP(+15.99)GFPGAR(+15.99).G	Y	32.98	1571.77	18	1.4	786.893	2	17.58		F27:248	2	387	404	Oxidation or Hydroxylation	P6:Oxidation or Hydroxylation:64.00;P12:Oxidation or Hydroxylation:0.00;R18:Oxidation or Hydroxylation:0.00
Sample 1	1	1	Collagen alpha-2(I) chain OS=Gallus gallus GN=COL1A2 PE=4 SV=1	tr|F1P0H9|F1P0H9_CHICK	K.GETGPAGPP(+15.99)GFQGLP(+15.99)GPSGPAGEAGKP(+15.99)GER.G	Y	38.58	2776.31	30	1.6	926.444	3	18.41		F27:268	1	543	572	Oxidation or Hydroxylation	P9:Oxidation or Hydroxylation:14.02;P15:Oxidation or Hydroxylation:26.31;P27:Oxidation or Hydroxylation:26.08
Sample 1	1	1	Collagen alpha-2(I) chain OS=Gallus gallus GN=COL1A2 PE=4 SV=1	tr|F1P0H9|F1P0H9_CHICK	R.NGLP(+15.99)GPIGPAGVR.G	Y	25.03	1219.67	13	1.2	610.842	2	18.5		F27:271	3	1067	1079	Oxidation or Hydroxylation	P4:Oxidation or Hydroxylation:39.76
Sample 1	1	1	Collagen alpha-2(I) chain OS=Gallus gallus GN=COL1A2 PE=4 SV=1	tr|F1P0H9|F1P0H9_CHICK	K.GETGPAGPPGF(+15.99)QGLP(+15.99)GPSGPAGEAGKPGER(+15.99).G	Y	37.93	2776.31	30	1.2	926.443	3	18.69		F27:277	1	543	572	Oxidation or Hydroxylation	F11:Oxidation or Hydroxylation:0.00;P15:Oxidation or Hydroxylation:26.31;R30:Oxidation or Hydroxylation:0.00
Sample 1	2	4	Collagen alpha-1(I) chain OS=Gallus gallus GN=COL1A1 PE=1 SV=3	P02457|CO1A1_CHICK	R.GQAGVMGFPGPK(+15.99).G	Y	37.41	1160.56	12	0.9	581.29	2	19.1		F27:288	1	564	575	Oxidation or Hydroxylation	K12:Oxidation or Hydroxylation:0.00
Sample 1	1	1	Collagen alpha-2(I) chain OS=Gallus gallus GN=COL1A2 PE=4 SV=1	tr|F1P0H9|F1P0H9_CHICK	K.GAAGLP(+15.99)GVAGAP(+15.99)GLPGP(+15.99)R.G	Y	28.45	1561.82	18	1.2	781.919	2	19.29		F27:294	2	309	326	Oxidation or Hydroxylation	P6:Oxidation or Hydroxylation:106.84;P12:Oxidation or Hydroxylation:29.32;P17:Oxidation or Hydroxylation:0.00
Sample 1	2	4	Collagen alpha-1(I) chain OS=Gallus gallus GN=COL1A1 PE=1 SV=3	P02457|CO1A1_CHICK	R.GQAGVM(+15.99)GFP(+15.99)GPK.G	Y	45.98	1176.56	12	1.1	589.288	2	19.37		F27:297	2	564	575	Oxidation (M); Oxidation or Hydroxylation	M6:Oxidation (M):1000.00;P9:Oxidation or Hydroxylation:12.81
Sample 1	1	1	Collagen alpha-2(I) chain OS=Gallus gallus GN=COL1A2 PE=4 SV=1	tr|F1P0H9|F1P0H9_CHICK	K.GP(+15.99)KGETGPTGAIGPIGASGPP(+15.99)GPVGAAGPAGPR.G	Y	35.66	2836.45	33	1.5	946.491	3	19.61		F27:304	1	744	776	Oxidation or Hydroxylation	P2:Oxidation or Hydroxylation:0.00;P21:Oxidation or Hydroxylation:26.31
Sample 1	1	1	Collagen alpha-2(I) chain OS=Gallus gallus GN=COL1A2 PE=4 SV=1	tr|F1P0H9|F1P0H9_CHICK	R.GLPGESGAVGPAGPIGSR.G	Y	29.82	1577.82	18	0.4	789.916	2	19.67		F27:306	1	591	608
Sample 1	2	4	Collagen alpha-1(I) chain OS=Gallus gallus GN=COL1A1 PE=1 SV=3	P02457|CO1A1_CHICK	R.GFSGLQGPP(+15.99)GPPGAP(+15.99)GEQGPSGASGPAGPR.G	Y	38.4	2672.26	30	1.8	1337.14	2	19.89		F27:313	1	1101	1130	Oxidation or Hydroxylation	P9:Oxidation or Hydroxylation:45.01;P15:Oxidation or Hydroxylation:50.34
Sample 1	2	4	Collagen alpha-1(I) chain OS=Gallus gallus GN=COL1A1 PE=1 SV=3	P02457|CO1A1_CHICK	K.DGLNGLP(+15.99)GPIGPPGPR(+31.99).G	Y	24.58	1560.79	16	0.9	781.403	2	20.18		F27:320	1	1142	1157	Oxidation or Hydroxylation; Dihydroxy	P7:Oxidation or Hydroxylation:26.31;R16:Dihydroxy:3.13
Sample 1	2	4	Collagen alpha-1(I) chain OS=Gallus gallus GN=COL1A1 PE=1 SV=3	P02457|CO1A1_CHICK	K.DGLNGLP(+15.99)GPIGPP(+15.99)GPR(+15.99).G	Y	16.06	1560.79	16	0.8	781.403	2	20.55		F27:329	1	1142	1157	Oxidation or Hydroxylation	P7:Oxidation or Hydroxylation:14.04;P13:Oxidation or Hydroxylation:0.00;R16:Oxidation or Hydroxylation:0.00
Sample 1	1	1	Collagen alpha-2(I) chain OS=Gallus gallus GN=COL1A2 PE=4 SV=1	tr|F1P0H9|F1P0H9_CHICK	R.GSDGSAGPTGPAGPIGAAGPP(+15.99)GFP(+15.99)GAP(+15.99)GAK.G	Y	31.95	2520.19	30	1.8	1261.1	2	20.66		F27:333	2	234	263	Oxidation or Hydroxylation	P21:Oxidation or Hydroxylation:14.02;P24:Oxidation or Hydroxylation:14.02;P27:Oxidation or Hydroxylation:33.81
Sample 1	6	7	Uncharacterized protein OS=Gallus gallus GN=AHSG PE=4 SV=1	tr|E1BZE1|E1BZE1_CHICK	K.VNGQ(+.98)FSVLASK.C	Y	34.08	1149.6	11	1	575.809	2	20.88		F27:339	1	118	128	Deamidation (NQ)	Q4:Deamidation (NQ):22.85
Sample 1	3	6	Apolipoprotein A-I OS=Gallus gallus GN=APOA1 PE=1 SV=2	P08250|APOA1_CHICK	K.LADNLDTLSAAAAK.L	Y	35.62	1372.72	14	0.9	687.368	2	21.22		F27:347	2	69	82
Sample 1	12	116	Histone-lysine N-methyltransferase OS=Gallus gallus GN=MLL3 PE=4 SV=2	tr|F1NW66|F1NW66_CHICK	F.GKDLLDTSRQNK.M	Y	16.8	1373.73	12	-1.8	687.869	2	21.35		F27:351	1	1380	1391
Sample 1	1	1	Collagen alpha-2(I) chain OS=Gallus gallus GN=COL1A2 PE=4 SV=1	tr|F1P0H9|F1P0H9_CHICK	K.GETGPTGAIGPIGASGPP(+15.99)GPVGAAGPAGPR.G	Y	31.91	2538.28	30	1.9	1270.15	2	21.69		F27:357	1	747	776	Oxidation or Hydroxylation	P18:Oxidation or Hydroxylation:17.01
Sample 1	1	1	Collagen alpha-2(I) chain OS=Gallus gallus GN=COL1A2 PE=4 SV=1	tr|F1P0H9|F1P0H9_CHICK	R.GDPGPVGP(+15.99)VGPAGAFGPR.G	Y	31.66	1619.81	18	0.7	810.911	2	22.43		F27:377	1	978	995	Oxidation or Hydroxylation	P8:Oxidation or Hydroxylation:0.00
Sample 1	5	85	Uncharacterized protein OS=Gallus gallus GN=COL4A6 PE=4 SV=2	tr|F1P3T8|F1P3T8_CHICK	R.GDVGPPGLPVLGAQ(+.98)EQA.L	Y	20.85	1604.8	17	6.9	803.415	2	22.49		F27:379	1	957	973	Deamidation (NQ)	Q14:Deamidation (NQ):0.00
Sample 1	1	1	Collagen alpha-2(I) chain OS=Gallus gallus GN=COL1A2 PE=4 SV=1	tr|F1P0H9|F1P0H9_CHICK	R.GLP(+15.99)GIAGATGEPGPLGVSGPP(+15.99)GAR.G	Y	33.19	2116.09	24	1.9	1059.05	2	23.69		F27:402	1	882	905	Oxidation or Hydroxylation	P3:Oxidation or Hydroxylation:106.84;P21:Oxidation or Hydroxylation:0.00
Sample 1	3	6	Apolipoprotein A-I OS=Gallus gallus GN=APOA1 PE=1 SV=2	P08250|APOA1_CHICK	K.IRPFLDQFSAK.W	Y	32.83	1320.72	11	0.6	441.247	3	23.83		F27:405	3	120	130
Sample 1	7	2	Serum albumin OS=Gallus gallus GN=ALB PE=4 SV=2	tr|F2Z4L6|F2Z4L6_CHICK	R.SQC(+57.02)IM(+15.99)EAEFDEKPADLPSLVEK.Y	Y	16.59	2551.18	22	0.7	851.402	3	24.52		F27:419	1	265	286	Carbamidomethylation; Oxidation (M)	C3:Carbamidomethylation:1000.00;M5:Oxidation (M):1000.00
Sample 1	7	3	Serum albumin OS=Gallus gallus GN=ALB PE=1 SV=2	P19121|ALBU_CHICK	R.SQC(+57.02)IM(+15.99)EAEFDEKPADLPSLVEK.Y	Y	16.59	2551.18	22	0.7	851.402	3	24.52		F27:419	1	315	336	Carbamidomethylation; Oxidation (M)	C3:Carbamidomethylation:1000.00;M5:Oxidation (M):1000.00
Sample 1	9	35	Lumican OS=Gallus gallus GN=LUM PE=1 SV=1	P51890|LUM_CHICK	R.ADLPQEMYNC(+57.02)LR.V	Y	35.43	1508.68	12	1.4	755.346	2	25.77		F27:437	1	324	335	Carbamidomethylation	C10:Carbamidomethylation:1000.00
Sample 1	3	6	Apolipoprotein A-I OS=Gallus gallus GN=APOA1 PE=1 SV=2	P08250|APOA1_CHICK	R.EM(+15.99)WLKDTEALRAELTK.D	Y	38.4	1948.99	16	0.7	650.672	3	25.91		F27:441	1	96	111	Oxidation (M)	M2:Oxidation (M):1000.00
Sample 1	10	10	Decorin OS=Gallus gallus GN=DCN PE=1 SV=1	P28675|PGS2_CHICK	K.IDAEGLSGLTNLAK.L	Y	37.28	1400.75	14	1.1	701.384	2	26.39		F27:448	1	234	247
Sample 1	10	11	Decorin OS=Gallus gallus GN=DCN PE=4 SV=2	tr|E1BRE9|E1BRE9_CHICK	K.IDAEGLSGLTNLAK.L	Y	37.28	1400.75	14	1.1	701.384	2	26.39		F27:448	1	234	247
Sample 1	1	1	Collagen alpha-2(I) chain OS=Gallus gallus GN=COL1A2 PE=4 SV=1	tr|F1P0H9|F1P0H9_CHICK	A.DFGPGPMGLMGPR.G	Y	30.43	1330.62	13	0.6	666.316	2	27.94		F27:469	1	86	98
Sample 1	11	7875	Hemoglobin subunit rho OS=Gallus gallus PE=1 SV=2	P02127|HBRH_CHICK	R.LLIVYPWTQR.F	Y	22.63	1287.73	10	1.2	644.875	2	30.16		F27:493	1	32	41
Sample 1	11	7876	Hemoglobin subunit epsilon OS=Gallus gallus GN=HBE PE=1 SV=2	P02128|HBE_CHICK	R.LLIVYPWTQR.F	Y	22.63	1287.73	10	1.2	644.875	2	30.16		F27:493	1	32	41
Sample 1	11	7877	Hemoglobin subunit beta OS=Gallus gallus GN=HBB PE=1 SV=2	P02112|HBB_CHICK	R.LLIVYPWTQR.F	Y	22.63	1287.73	10	1.2	644.875	2	30.16		F27:493	1	32	41
Sample 1	11	7878	Beta-H globin OS=Gallus gallus GN=HBE1 PE=3 SV=1	tr|Q90864|Q90864_CHICK	R.LLIVYPWTQR.F	Y	22.63	1287.73	10	1.2	644.875	2	30.16		F27:493	1	32	41
Sample 1	11	7879	Hemoglobin subunit epsilon OS=Gallus gallus GN=HBE PE=3 SV=1	tr|F1NMZ3|F1NMZ3_CHICK	R.LLIVYPWTQR.F	Y	22.63	1287.73	10	1.2	644.875	2	30.16		F27:493	1	32	41
Sample 1	7	2	Serum albumin OS=Gallus gallus GN=ALB PE=4 SV=2	tr|F2Z4L6|F2Z4L6_CHICK	K.YVPPPFNPDMFSFDEK.L	Y	18.16	1928.87	16	1.2	965.441	2	31.77		F27:509	1	475	490
Sample 1	7	3	Serum albumin OS=Gallus gallus GN=ALB PE=1 SV=2	P19121|ALBU_CHICK	K.YVPPPFNPDMFSFDEK.L	Y	18.16	1928.87	16	1.2	965.441	2	31.77		F27:509	1	525	540
Sample 1	6	7	Uncharacterized protein OS=Gallus gallus GN=AHSG PE=4 SV=1	tr|E1BZE1|E1BZE1_CHICK	K.NPDVYLM(+15.99)LLEIGR.A	Y	17.8	1547.8	13	1	774.909	2	32.76		F27:521	1	172	184	Oxidation (M)	M7:Oxidation (M):1000.00
Sample 1	6	7	Uncharacterized protein OS=Gallus gallus GN=AHSG PE=4 SV=1	tr|E1BZE1|E1BZE1_CHICK	A.APAAPPPPLGC(+57.02)DDPEIEAAAEFAVIYINGHSHHGYR.F	Y	21.36	3838.82	36	1.8	960.713	4	33.19		F27:528	1	19	54	Carbamidomethylation	C11:Carbamidomethylation:1000.00
Sample 1	1	1	Collagen alpha-2(I) chain OS=Gallus gallus GN=COL1A2 PE=4 SV=1	tr|F1P0H9|F1P0H9_CHICK	R.TNKPSRLPILDIAPLDIGGADQEFGLHIGPVC(+57.02)FK	Y	37.92	3687.94	34	1.7	922.995	4	33.27		F27:530	1	1330	1363	Carbamidomethylation	C32:Carbamidomethylation:1000.00
Sample 1	7	2	Serum albumin OS=Gallus gallus GN=ALB PE=4 SV=2	tr|F2Z4L6|F2Z4L6_CHICK	R.RHPFLYAPAILSFAVDFEHALQSCC(+57.02)K(+57.02).E	Y	17.41	3076.51	26	0.5	770.134	4	38.34		F27:573	1	123	148	Carbamidomethylation; Carbamidomethylation (DHKE X@N-term)	C25:Carbamidomethylation:1000.00;K26:Carbamidomethylation (DHKE X@N-term):0.00
Sample 1	12	116	Histone-lysine N-methyltransferase OS=Gallus gallus GN=MLL3 PE=4 SV=2	tr|F1NW66|F1NW66_CHICK	D.ISEGR.D	Y	16.29	560.292	5	-9.3	561.294	1	45.69		F27:632	1	873	877
Sample 2	2	4	Collagen alpha-1(I) chain OS=Gallus gallus GN=COL1A1 PE=1 SV=3	P02457|CO1A1_CHICK	R.GAP(+15.99)GPP(+15.99)GAVGAAGKDGEAGAQGPP(+15.99)GPTGPAGER.G	Y	36.93	2855.34	33	1.4	952.79	3	13.59		F28:151	2	588	620	Oxidation or Hydroxylation	P3:Oxidation or Hydroxylation:14.04;P6:Oxidation or Hydroxylation:17.01;P24:Oxidation or Hydroxylation:17.91
Sample 2	2	4	Collagen alpha-1(I) chain OS=Gallus gallus GN=COL1A1 PE=1 SV=3	P02457|CO1A1_CHICK	R.GAP(+15.99)GPP(+15.99)GAVGAAGKDGEAGAQGPPGPTGPAGER.G	Y	36.39	2839.35	33	1.4	947.458	3	14.19		F28:163	2	588	620	Oxidation or Hydroxylation	P3:Oxidation or Hydroxylation:9.40;P6:Oxidation or Hydroxylation:12.28
Sample 2	1	1	Collagen alpha-2(I) chain OS=Gallus gallus GN=COL1A2 PE=4 SV=1	tr|F1P0H9|F1P0H9_CHICK	R.GASGPVGAKGPN(+.98)GDAGR(+15.99)PGEP(+15.99)GLMGPR.G	Y	47.66	2491.19	27	0.9	623.805	4	14.52		F28:168	1	423	449	Deamidation (NQ); Oxidation or Hydroxylation	N12:Deamidation (NQ):1000.00;R17:Oxidation or Hydroxylation:0.00;P21:Oxidation or Hydroxylation:4.75
Sample 2	7	2	Serum albumin OS=Gallus gallus GN=ALB PE=4 SV=2	tr|F2Z4L6|F2Z4L6_CHICK	R.KQETTPINDNVSQC(+57.02)C(+57.02)SSSYANR.R	Y	15.85	2558.11	22	2	853.713	3	14.67		F28:172	1	441	462	Carbamidomethylation	C14:Carbamidomethylation:1000.00;C15:Carbamidomethylation:1000.00
Sample 2	4	66	Alpha 1 type II procollagen (Fragment) OS=Gallus gallus GN=COL2A1 PE=4 SV=1	tr|Q7T2Z7|Q7T2Z7_CHICK	R.GAPGERGEPGM(sub A)PGPAGFAGPP(+15.99)GADGQP(+15.99)GAK.G	Y	22.13	2718.25	30	-5.3	907.084	3	14.76		F28:174	1	601	630	Oxidation or Hydroxylation; Mutation	P21:Oxidation or Hydroxylation:11.06;P27:Oxidation or Hydroxylation:0.00
Sample 2	4	67	Collagen alpha-1(II) chain (Fragment) OS=Gallus gallus GN=COL2A1 PE=4 SV=2	tr|H9L2B7|H9L2B7_CHICK	R.GAPGERGEPGM(sub A)PGPAGFAGPP(+15.99)GADGQP(+15.99)GAK.G	Y	22.13	2718.25	30	-5.3	907.084	3	14.76		F28:174	1	640	669	Oxidation or Hydroxylation; Mutation	P21:Oxidation or Hydroxylation:11.06;P27:Oxidation or Hydroxylation:0.00
Sample 2	4	68	Alpha 1 type IIA collagen OS=Gallus gallus GN=COL2A1 PE=2 SV=1	tr|Q90W37|Q90W37_CHICK	R.GAPGERGEPGM(sub A)PGPAGFAGPP(+15.99)GADGQP(+15.99)GAK.G	Y	22.13	2718.25	30	-5.3	907.084	3	14.76		F28:174	1	752	781	Oxidation or Hydroxylation; Mutation	P21:Oxidation or Hydroxylation:11.06;P27:Oxidation or Hydroxylation:0.00
Sample 2	2	4	Collagen alpha-1(I) chain OS=Gallus gallus GN=COL1A1 PE=1 SV=3	P02457|CO1A1_CHICK	R.GEP(+15.99)GPAGLP(+15.99)GPAGER.G	Y	38.64	1392.66	15	0.4	697.339	2	14.92		F28:178	3	462	476	Oxidation or Hydroxylation	P3:Oxidation or Hydroxylation:5.47;P9:Oxidation or Hydroxylation:14.63
Sample 2	1	1	Collagen alpha-2(I) chain OS=Gallus gallus GN=COL1A2 PE=4 SV=1	tr|F1P0H9|F1P0H9_CHICK	R.VGP(+15.99)P(+15.99)GPAGITGPP(+15.99)GPP(+15.99)GPAGK.D	Y	35.6	1840.93	21	1.4	921.475	2	15.77		F28:195	4	794	814	Oxidation or Hydroxylation	P3:Oxidation or Hydroxylation:28.36;P4:Oxidation or Hydroxylation:11.10;P13:Oxidation or Hydroxylation:14.02;P16:Oxidation or Hydroxylation:6.59
Sample 2	2	4	Collagen alpha-1(I) chain OS=Gallus gallus GN=COL1A1 PE=1 SV=3	P02457|CO1A1_CHICK	R.GFP(+15.99)GADGIAGPKGPP(+15.99)GER.G	Y	44.17	1710.83	18	1.4	856.425	2	16.25		F28:207	2	483	500	Oxidation or Hydroxylation	P3:Oxidation or Hydroxylation:17.01;P15:Oxidation or Hydroxylation:0.00
Sample 2	2	4	Collagen alpha-1(I) chain OS=Gallus gallus GN=COL1A1 PE=1 SV=3	P02457|CO1A1_CHICK	K.GSP(+15.99)GADGPIGAP(+15.99)GTP(+15.99)GPQGIAGQR.G	Y	32.59	2162.04	24	1.7	1082.03	2	16.73		F28:219	2	924	947	Oxidation or Hydroxylation	P3:Oxidation or Hydroxylation:0.00;P12:Oxidation or Hydroxylation:39.44;P15:Oxidation or Hydroxylation:15.73
Sample 2	1	1	Collagen alpha-2(I) chain OS=Gallus gallus GN=COL1A2 PE=4 SV=1	tr|F1P0H9|F1P0H9_CHICK	R.GLHGEFGVP(+15.99)GPAGPR.G	Y	51.98	1462.73	15	1.2	732.374	2	16.82		F28:222	2	573	587	Oxidation or Hydroxylation	P9:Oxidation or Hydroxylation:22.85
Sample 2	1	1	Collagen alpha-2(I) chain OS=Gallus gallus GN=COL1A2 PE=4 SV=1	tr|F1P0H9|F1P0H9_CHICK	K.GEIGPAGNVGPTGPAGPR.G	Y	59.83	1602.81	18	1.1	802.414	2	16.84		F28:223	2	264	281
Sample 2	1	1	Collagen alpha-2(I) chain OS=Gallus gallus GN=COL1A2 PE=4 SV=1	tr|F1P0H9|F1P0H9_CHICK	K.EGPVGFP(+15.99)GADGR.V	Y	46.41	1173.54	12	0.5	587.778	2	16.93		F28:226	2	464	475	Oxidation or Hydroxylation	P7:Oxidation or Hydroxylation:8.69
Sample 2	2	4	Collagen alpha-1(I) chain OS=Gallus gallus GN=COL1A1 PE=1 SV=3	P02457|CO1A1_CHICK	K.GSPGAD(+15.99)GPIGAP(+15.99)GTP(+15.99)GPQGIAGQR.G	Y	26.47	2162.04	24	1.4	1082.03	2	16.95		F28:227	1	924	947	Oxidation or Hydroxylation	D6:Oxidation or Hydroxylation:0.00;P12:Oxidation or Hydroxylation:39.44;P15:Oxidation or Hydroxylation:17.01
Sample 2	2	4	Collagen alpha-1(I) chain OS=Gallus gallus GN=COL1A1 PE=1 SV=3	P02457|CO1A1_CHICK	R.GLTGPIGPP(+15.99)GPAGAPGD(+15.99)KGEAGPP(+15.99)GPAGPTGAR.G	Y	50.87	2878.42	33	2	960.483	3	17.09		F28:231	3	753	785	Oxidation or Hydroxylation	P9:Oxidation or Hydroxylation:20.41;D17:Oxidation or Hydroxylation:10.92;P24:Oxidation or Hydroxylation:20.41
Sample 2	2	4	Collagen alpha-1(I) chain OS=Gallus gallus GN=COL1A1 PE=1 SV=3	P02457|CO1A1_CHICK	K.GATGAP(+15.99)GIAGAPGF(+15.99)P(+15.99)GAR.G	Y	23.82	1571.77	18	1.5	786.893	2	17.15		F28:233	1	387	404	Oxidation or Hydroxylation	P6:Oxidation or Hydroxylation:72.73;F14:Oxidation or Hydroxylation:0.00;P15:Oxidation or Hydroxylation:9.42
Sample 2	2	4	Collagen alpha-1(I) chain OS=Gallus gallus GN=COL1A1 PE=1 SV=3	P02457|CO1A1_CHICK	K.GATGAP(+15.99)GIAGAPGF(+15.99)PGAR(+15.99).G	Y	31.37	1571.77	18	1.5	786.893	2	17.39		F28:240	1	387	404	Oxidation or Hydroxylation	P6:Oxidation or Hydroxylation:72.73;F14:Oxidation or Hydroxylation:8.22;R18:Oxidation or Hydroxylation:0.00
Sample 2	2	4	Collagen alpha-1(I) chain OS=Gallus gallus GN=COL1A1 PE=1 SV=3	P02457|CO1A1_CHICK	R.GPP(+15.99)GPMGPP(+15.99)GLAGPP(+15.99)GEAGR.E	Y	41.88	1815.86	20	1.6	908.937	2	17.44		F28:242	3	984	1003	Oxidation or Hydroxylation	P3:Oxidation or Hydroxylation:17.01;P9:Oxidation or Hydroxylation:17.01;P15:Oxidation or Hydroxylation:11.06
Sample 2	1	1	Collagen alpha-2(I) chain OS=Gallus gallus GN=COL1A2 PE=4 SV=1	tr|F1P0H9|F1P0H9_CHICK	R.TGEQGIAGPP(+15.99)GFAGEK.G	Y	42.11	1530.73	16	1.3	766.374	2	17.6		F28:247	2	830	845	Oxidation or Hydroxylation	P10:Oxidation or Hydroxylation:5.99
Sample 2	2	4	Collagen alpha-1(I) chain OS=Gallus gallus GN=COL1A1 PE=1 SV=3	P02457|CO1A1_CHICK	R.GFP(+15.99)GADGIAGPK.G	Y	43.5	1101.55	12	0.9	551.78	2	17.7		F28:250	3	483	494	Oxidation or Hydroxylation	P3:Oxidation or Hydroxylation:8.69
Sample 2	2	4	Collagen alpha-1(I) chain OS=Gallus gallus GN=COL1A1 PE=1 SV=3	P02457|CO1A1_CHICK	R.GLTGPIGPP(+15.99)GPAGAPGDKGEAGPPGP(+15.99)AGPTGAR.G	Y	27.48	2862.43	33	0	955.149	3	17.79		F28:253	1	753	785	Oxidation or Hydroxylation	P9:Oxidation or Hydroxylation:0.00;P26:Oxidation or Hydroxylation:0.00
Sample 2	1	1	Collagen alpha-2(I) chain OS=Gallus gallus GN=COL1A2 PE=4 SV=1	tr|F1P0H9|F1P0H9_CHICK	R.GLP(+15.99)GESGAVGPAGPIGSR.G	Y	42.11	1593.81	18	1.6	797.914	2	17.97		F28:258	3	591	608	Oxidation or Hydroxylation	P3:Oxidation or Hydroxylation:89.48
Sample 2	1	1	Collagen alpha-2(I) chain OS=Gallus gallus GN=COL1A2 PE=4 SV=1	tr|F1P0H9|F1P0H9_CHICK	R.GDAGPP(+15.99)GMTGFP(+15.99)GAAGR.V	Y	55.09	1546.68	17	0.9	774.35	2	18.1		F28:263	3	777	793	Oxidation or Hydroxylation	P6:Oxidation or Hydroxylation:10.11;P12:Oxidation or Hydroxylation:40.00
Sample 2	1	1	Collagen alpha-2(I) chain OS=Gallus gallus GN=COL1A2 PE=4 SV=1	tr|F1P0H9|F1P0H9_CHICK	K.GETGPAGPPGF(+15.99)QGLP(+15.99)GPSGPAGEAGKP(+15.99)GER.G	Y	42.84	2776.31	30	1.6	926.444	3	18.29		F28:269	1	543	572	Oxidation or Hydroxylation	F11:Oxidation or Hydroxylation:0.00;P15:Oxidation or Hydroxylation:12.19;P27:Oxidation or Hydroxylation:0.00
Sample 2	1	1	Collagen alpha-2(I) chain OS=Gallus gallus GN=COL1A2 PE=4 SV=1	tr|F1P0H9|F1P0H9_CHICK	K.GETGPAGPP(+15.99)GFQGLP(+15.99)GPSGPAGEAGKPGER(+15.99).G	Y	46.62	2776.31	30	1.2	926.443	3	18.55		F28:277	1	543	572	Oxidation or Hydroxylation	P9:Oxidation or Hydroxylation:12.28;P15:Oxidation or Hydroxylation:9.40;R30:Oxidation or Hydroxylation:0.00
Sample 2	1	1	Collagen alpha-2(I) chain OS=Gallus gallus GN=COL1A2 PE=4 SV=1	tr|F1P0H9|F1P0H9_CHICK	R.VGPIGPAGNRGEP(+15.99)GNIGFPGPK(+15.99).G	Y	35.42	2119.08	22	1	707.368	3	18.57		F28:278	3	476	497	Oxidation or Hydroxylation	P13:Oxidation or Hydroxylation:0.00;K22:Oxidation or Hydroxylation:0.00
Sample 2	2	4	Collagen alpha-1(I) chain OS=Gallus gallus GN=COL1A1 PE=1 SV=3	P02457|CO1A1_CHICK	R.GFP(+15.99)GLP(+15.99)GPSGEP(+15.99)GK.Q	N	29.07	1343.64	14	1.1	672.826	2	18.6		F28:279	1	960	973	Oxidation or Hydroxylation	P3:Oxidation or Hydroxylation:7.65;P6:Oxidation or Hydroxylation:32.28;P12:Oxidation or Hydroxylation:0.00
Sample 2	4	66	Alpha 1 type II procollagen (Fragment) OS=Gallus gallus GN=COL2A1 PE=4 SV=1	tr|Q7T2Z7|Q7T2Z7_CHICK	R.GFP(+15.99)GLP(+15.99)GPSGEP(+15.99)GK.Q	N	29.07	1343.64	14	1.1	672.826	2	18.6		F28:279	1	775	788	Oxidation or Hydroxylation	P3:Oxidation or Hydroxylation:7.65;P6:Oxidation or Hydroxylation:32.28;P12:Oxidation or Hydroxylation:0.00
Sample 2	4	67	Collagen alpha-1(II) chain (Fragment) OS=Gallus gallus GN=COL2A1 PE=4 SV=2	tr|H9L2B7|H9L2B7_CHICK	R.GFP(+15.99)GLP(+15.99)GPSGEP(+15.99)GK.Q	N	29.07	1343.64	14	1.1	672.826	2	18.6		F28:279	1	814	827	Oxidation or Hydroxylation	P3:Oxidation or Hydroxylation:7.65;P6:Oxidation or Hydroxylation:32.28;P12:Oxidation or Hydroxylation:0.00
Sample 2	4	68	Alpha 1 type IIA collagen OS=Gallus gallus GN=COL2A1 PE=2 SV=1	tr|Q90W37|Q90W37_CHICK	R.GFP(+15.99)GLP(+15.99)GPSGEP(+15.99)GK.Q	N	29.07	1343.64	14	1.1	672.826	2	18.6		F28:279	1	926	939	Oxidation or Hydroxylation	P3:Oxidation or Hydroxylation:7.65;P6:Oxidation or Hydroxylation:32.28;P12:Oxidation or Hydroxylation:0.00
Sample 2	2	4	Collagen alpha-1(I) chain OS=Gallus gallus GN=COL1A1 PE=1 SV=3	P02457|CO1A1_CHICK	R.GPP(+15.99)GPMGPPGLAGPP(+15.99)GEAGR.E	Y	37.96	1799.86	20	0.9	900.939	2	18.67		F28:281	2	984	1003	Oxidation or Hydroxylation	P3:Oxidation or Hydroxylation:17.01;P15:Oxidation or Hydroxylation:0.00
Sample 2	1	1	Collagen alpha-2(I) chain OS=Gallus gallus GN=COL1A2 PE=4 SV=1	tr|F1P0H9|F1P0H9_CHICK	R.VGPIGPAGNRGEP(+15.99)GNIGFP(+15.99)GPK.G	Y	29.6	2119.08	22	1.1	707.368	3	18.89		F28:285	2	476	497	Oxidation or Hydroxylation	P13:Oxidation or Hydroxylation:0.00;P19:Oxidation or Hydroxylation:0.00
Sample 2	2	4	Collagen alpha-1(I) chain OS=Gallus gallus GN=COL1A1 PE=1 SV=3	P02457|CO1A1_CHICK	R.GFSGLQGPP(+15.99)GPP(+15.99)GAP(+15.99)GEQGPSGASGPAGPR.G	Y	37.52	2688.25	30	2.6	1345.14	2	18.94		F28:287	3	1101	1130	Oxidation or Hydroxylation	P9:Oxidation or Hydroxylation:17.01;P12:Oxidation or Hydroxylation:0.00;P15:Oxidation or Hydroxylation:25.70
Sample 2	2	4	Collagen alpha-1(I) chain OS=Gallus gallus GN=COL1A1 PE=1 SV=3	P02457|CO1A1_CHICK	R.GQAGVMGFPGP(+15.99)K.G	Y	44.63	1160.56	12	0.7	581.29	2	19.04		F28:290	1	564	575	Oxidation or Hydroxylation	P11:Oxidation or Hydroxylation:0.00
Sample 2	2	4	Collagen alpha-1(I) chain OS=Gallus gallus GN=COL1A1 PE=1 SV=3	P02457|CO1A1_CHICK	R.GQAGVMGFP(+15.99)GPK.G	Y	45.58	1160.56	12	0.9	581.29	2	19.19		F28:294	2	564	575	Oxidation or Hydroxylation	P9:Oxidation or Hydroxylation:0.00
Sample 2	1	1	Collagen alpha-2(I) chain OS=Gallus gallus GN=COL1A2 PE=4 SV=1	tr|F1P0H9|F1P0H9_CHICK	K.GAAGLP(+15.99)GVAGAP(+15.99)GLP(+15.99)GPR.G	Y	27.89	1561.82	18	1.3	781.919	2	19.22		F28:295	1	309	326	Oxidation or Hydroxylation	P6:Oxidation or Hydroxylation:73.38;P12:Oxidation or Hydroxylation:5.81;P15:Oxidation or Hydroxylation:0.00
Sample 2	1	1	Collagen alpha-2(I) chain OS=Gallus gallus GN=COL1A2 PE=4 SV=1	tr|F1P0H9|F1P0H9_CHICK	K.GPK(+15.99)GETGPTGAIGPIGASGPP(+15.99)GPVGAAGPAGPR.G	Y	47.24	2836.45	33	1.4	946.491	3	19.27		F28:297	3	744	776	Oxidation or Hydroxylation	K3:Oxidation or Hydroxylation:0.00;P21:Oxidation or Hydroxylation:14.02
Sample 2	2	4	Collagen alpha-1(I) chain OS=Gallus gallus GN=COL1A1 PE=1 SV=3	P02457|CO1A1_CHICK	R.GFP(+15.99)GLP(+15.99)GPSGEPGK.Q	N	42.47	1327.64	14	1	664.828	2	19.3		F28:298	4	960	973	Oxidation or Hydroxylation	P3:Oxidation or Hydroxylation:17.01;P6:Oxidation or Hydroxylation:33.18
Sample 2	4	66	Alpha 1 type II procollagen (Fragment) OS=Gallus gallus GN=COL2A1 PE=4 SV=1	tr|Q7T2Z7|Q7T2Z7_CHICK	R.GFP(+15.99)GLP(+15.99)GPSGEPGK.Q	N	42.47	1327.64	14	1	664.828	2	19.3		F28:298	4	775	788	Oxidation or Hydroxylation	P3:Oxidation or Hydroxylation:17.01;P6:Oxidation or Hydroxylation:33.18
Sample 2	4	67	Collagen alpha-1(II) chain (Fragment) OS=Gallus gallus GN=COL2A1 PE=4 SV=2	tr|H9L2B7|H9L2B7_CHICK	R.GFP(+15.99)GLP(+15.99)GPSGEPGK.Q	N	42.47	1327.64	14	1	664.828	2	19.3		F28:298	4	814	827	Oxidation or Hydroxylation	P3:Oxidation or Hydroxylation:17.01;P6:Oxidation or Hydroxylation:33.18
Sample 2	4	68	Alpha 1 type IIA collagen OS=Gallus gallus GN=COL2A1 PE=2 SV=1	tr|Q90W37|Q90W37_CHICK	R.GFP(+15.99)GLP(+15.99)GPSGEPGK.Q	N	42.47	1327.64	14	1	664.828	2	19.3		F28:298	4	926	939	Oxidation or Hydroxylation	P3:Oxidation or Hydroxylation:17.01;P6:Oxidation or Hydroxylation:33.18
Sample 2	2	4	Collagen alpha-1(I) chain OS=Gallus gallus GN=COL1A1 PE=1 SV=3	P02457|CO1A1_CHICK	R.GFSGLQGP(+15.99)PGPP(+15.99)GAP(+15.99)GEQGPSGASGPAGPR.G	Y	32.74	2688.25	30	3.4	1345.14	2	19.41		F28:301	1	1101	1130	Oxidation or Hydroxylation	P8:Oxidation or Hydroxylation:0.00;P12:Oxidation or Hydroxylation:10.11;P15:Oxidation or Hydroxylation:25.70
Sample 2	1	1	Collagen alpha-2(I) chain OS=Gallus gallus GN=COL1A2 PE=4 SV=1	tr|F1P0H9|F1P0H9_CHICK	K.GAAGLP(+15.99)GVAGAP(+15.99)GLPGPR(+15.99).G	Y	27.72	1561.82	18	1.2	781.919	2	19.52		F28:303	1	309	326	Oxidation or Hydroxylation	P6:Oxidation or Hydroxylation:76.18;P12:Oxidation or Hydroxylation:12.33;R18:Oxidation or Hydroxylation:0.00
Sample 2	1	1	Collagen alpha-2(I) chain OS=Gallus gallus GN=COL1A2 PE=4 SV=1	tr|F1P0H9|F1P0H9_CHICK	K.GPKGETGPTGAIGPIGASGPP(+15.99)GPVGAAGPAGPR.G	Y	45.91	2820.45	33	1	941.159	3	19.57		F28:305	2	744	776	Oxidation or Hydroxylation	P21:Oxidation or Hydroxylation:26.31
Sample 2	2	4	Collagen alpha-1(I) chain OS=Gallus gallus GN=COL1A1 PE=1 SV=3	P02457|CO1A1_CHICK	K.DGLNGLP(+15.99)GPIGPP(+31.99)GPR.G	Y	25.31	1560.79	16	0.8	781.403	2	20.23		F28:321	1	1142	1157	Oxidation or Hydroxylation; Dihydroxy	P7:Oxidation or Hydroxylation:14.04;P13:Dihydroxy:0.00
Sample 2	3	6	Apolipoprotein A-I OS=Gallus gallus GN=APOA1 PE=1 SV=2	P08250|APOA1_CHICK	K.WTEELEQYR.Q	Y	37.79	1252.57	9	0.7	627.294	2	20.61		F28:332	2	131	139
Sample 2	6	7	Uncharacterized protein OS=Gallus gallus GN=AHSG PE=4 SV=1	tr|E1BZE1|E1BZE1_CHICK	K.VN(+.98)GQFSVLASK.C	Y	42.77	1149.6	11	1.1	575.809	2	20.76		F28:336	1	118	128	Deamidation (NQ)	N2:Deamidation (NQ):21.68
Sample 2	1	1	Collagen alpha-2(I) chain OS=Gallus gallus GN=COL1A2 PE=4 SV=1	tr|F1P0H9|F1P0H9_CHICK	R.N(+.98)GLP(+15.99)GPIGPAGVR.G	Y	36.06	1220.65	13	0.7	611.333	2	20.91		F28:340	3	1067	1079	Deamidation (NQ); Oxidation or Hydroxylation	N1:Deamidation (NQ):1000.00;P4:Oxidation or Hydroxylation:39.76
Sample 2	2	4	Collagen alpha-1(I) chain OS=Gallus gallus GN=COL1A1 PE=1 SV=3	P02457|CO1A1_CHICK	K.SLSQQIENIR.S	Y	34.52	1186.63	10	0.5	594.323	2	20.97		F28:342	1	1226	1235
Sample 2	1	1	Collagen alpha-2(I) chain OS=Gallus gallus GN=COL1A2 PE=4 SV=1	tr|F1P0H9|F1P0H9_CHICK	K.AVILQGSNDVELR.A	Y	39.07	1412.76	13	0.9	707.389	2	21.04		F28:344	1	1286	1298
Sample 2	3	6	Apolipoprotein A-I OS=Gallus gallus GN=APOA1 PE=1 SV=2	P08250|APOA1_CHICK	R.EM(+15.99)WLKDTEALR.A	Y	31.5	1406.69	11	1	704.351	2	21.09		F28:345	1	96	106	Oxidation (M)	M2:Oxidation (M):1000.00
Sample 2	3	6	Apolipoprotein A-I OS=Gallus gallus GN=APOA1 PE=1 SV=2	P08250|APOA1_CHICK	K.M(+15.99)TPLVQEFR.E	Y	39.64	1135.57	9	1.2	568.793	2	21.13		F28:346	1	230	238	Oxidation (M)	M1:Oxidation (M):1000.00
Sample 2	1	1	Collagen alpha-2(I) chain OS=Gallus gallus GN=COL1A2 PE=4 SV=1	tr|F1P0H9|F1P0H9_CHICK	R.GDP(+15.99)GPVGPVGPAGAFGPR.G	Y	57.81	1619.81	18	0.8	810.911	2	22.01		F28:357	2	978	995	Oxidation or Hydroxylation	P3:Oxidation or Hydroxylation:17.01
Sample 2	1	1	Collagen alpha-2(I) chain OS=Gallus gallus GN=COL1A2 PE=4 SV=1	tr|F1P0H9|F1P0H9_CHICK	R.GFP(+15.99)GTP(+15.99)GLPGFK(+15.99).G	Y	30.75	1221.6	12	0.6	611.809	2	22.33		F28:364	2	165	176	Oxidation or Hydroxylation	P3:Oxidation or Hydroxylation:17.01;P6:Oxidation or Hydroxylation:38.16;K12:Oxidation or Hydroxylation:7.77
Sample 2	1	1	Collagen alpha-2(I) chain OS=Gallus gallus GN=COL1A2 PE=4 SV=1	tr|F1P0H9|F1P0H9_CHICK	R.GFP(+15.99)GTP(+15.99)GLP(+15.99)GFK.G	Y	32.09	1221.6	12	0.7	611.809	2	22.41		F28:367	2	165	176	Oxidation or Hydroxylation	P3:Oxidation or Hydroxylation:17.01;P6:Oxidation or Hydroxylation:30.64;P9:Oxidation or Hydroxylation:0.00
Sample 2	5	85	Uncharacterized protein OS=Gallus gallus GN=COL4A6 PE=4 SV=2	tr|F1P3T8|F1P3T8_CHICK	R.GDVGPPGLPVLGAQEQ(+.98)A.L	Y	25.36	1604.8	17	6.8	803.415	2	22.44		F28:368	3	957	973	Deamidation (NQ)	Q16:Deamidation (NQ):0.00
Sample 2	1	1	Collagen alpha-2(I) chain OS=Gallus gallus GN=COL1A2 PE=4 SV=1	tr|F1P0H9|F1P0H9_CHICK	R.GDPGPVGPVGP(+15.99)AGAFGPR.G	Y	38.99	1619.81	18	0.9	810.911	2	22.47		F28:369	1	978	995	Oxidation or Hydroxylation	P11:Oxidation or Hydroxylation:0.00
Sample 2	1	1	Collagen alpha-2(I) chain OS=Gallus gallus GN=COL1A2 PE=4 SV=1	tr|F1P0H9|F1P0H9_CHICK	R.GDPGPVGPVGPAGAFGPR(+31.99).G	Y	26.02	1635.8	18	-0.3	818.907	2	22.55		F28:371	2	978	995	Dihydroxy	R18:Dihydroxy:6.08
Sample 2	1	1	Collagen alpha-2(I) chain OS=Gallus gallus GN=COL1A2 PE=4 SV=1	tr|F1P0H9|F1P0H9_CHICK	R.GLP(+15.99)GIAGATGEP(+15.99)GPLGVSGP(+15.99)PGAR.G	Y	38.58	2132.09	24	1.2	1067.05	2	22.62		F28:373	2	882	905	Oxidation or Hydroxylation	P3:Oxidation or Hydroxylation:81.27;P12:Oxidation or Hydroxylation:8.22;P20:Oxidation or Hydroxylation:0.00
Sample 2	1	1	Collagen alpha-2(I) chain OS=Gallus gallus GN=COL1A2 PE=4 SV=1	tr|F1P0H9|F1P0H9_CHICK	R.GDPGPVGPVGPAGAFGPR.G	Y	49.07	1603.81	18	1.4	802.914	2	22.68		F28:375	4	978	995
Sample 2	1	1	Collagen alpha-2(I) chain OS=Gallus gallus GN=COL1A2 PE=4 SV=1	tr|F1P0H9|F1P0H9_CHICK	R.GLP(+15.99)GIAGATGEP(+15.99)GPLGVSGPPGAR(+15.99).G	Y	37.47	2132.09	24	1.4	1067.05	2	22.71		F28:376	2	882	905	Oxidation or Hydroxylation	P3:Oxidation or Hydroxylation:122.88;P12:Oxidation or Hydroxylation:9.40;R24:Oxidation or Hydroxylation:6.65
Sample 2	1	1	Collagen alpha-2(I) chain OS=Gallus gallus GN=COL1A2 PE=4 SV=1	tr|F1P0H9|F1P0H9_CHICK	R.GLP(+15.99)GIAGATGEPGPLGVSGPPGAR(+15.99).G	Y	23.52	2116.09	24	2	1059.06	2	23.85		F28:395	1	882	905	Oxidation or Hydroxylation	P3:Oxidation or Hydroxylation:46.57;R24:Oxidation or Hydroxylation:0.00
Sample 2	3	6	Apolipoprotein A-I OS=Gallus gallus GN=APOA1 PE=1 SV=2	P08250|APOA1_CHICK	K.MTPLVQEFR.E	Y	43.79	1119.57	9	0.8	560.795	2	23.9		F28:396	2	230	238
Sample 2	7	2	Serum albumin OS=Gallus gallus GN=ALB PE=4 SV=2	tr|F2Z4L6|F2Z4L6_CHICK	K.QQYFC(+57.02)GILK.Q	Y	31.85	1155.57	9	1	578.795	2	24.46		F28:402	2	174	182	Carbamidomethylation	C5:Carbamidomethylation:1000.00
Sample 2	7	3	Serum albumin OS=Gallus gallus GN=ALB PE=1 SV=2	P19121|ALBU_CHICK	K.QQYFC(+57.02)GILK.Q	Y	31.85	1155.57	9	1	578.795	2	24.46		F28:402	2	224	232	Carbamidomethylation	C5:Carbamidomethylation:1000.00
Sample 2	2	4	Collagen alpha-1(I) chain OS=Gallus gallus GN=COL1A1 PE=1 SV=3	P02457|CO1A1_CHICK	K.SGEYWIDPNQGCNLDAIK(+57.02).V	Y	19.37	2078.94	18	1.3	1040.48	2	26.04		F28:420	1	1260	1277	Carbamidomethylation (DHKE X@N-term)	K18:Carbamidomethylation (DHKE X@N-term):0.00
Sample 2	1	1	Collagen alpha-2(I) chain OS=Gallus gallus GN=COL1A2 PE=4 SV=1	tr|F1P0H9|F1P0H9_CHICK	K.AADFGPGPMGLMGPR.G	Y	38.03	1472.69	15	1.3	737.354	2	26.8		F28:429	2	84	98
Sample 2	1	1	Collagen alpha-2(I) chain OS=Gallus gallus GN=COL1A2 PE=4 SV=1	tr|F1P0H9|F1P0H9_CHICK	K.AADFGPGPM(+15.99)GLM(+15.99)GPR.G	Y	25.88	1504.68	15	1.2	753.348	2	26.83		F28:430	1	84	98	Oxidation (M)	M9:Oxidation (M):1000.00;M12:Oxidation (M):1000.00
Sample 2	1	1	Collagen alpha-2(I) chain OS=Gallus gallus GN=COL1A2 PE=4 SV=1	tr|F1P0H9|F1P0H9_CHICK	K.AADFGPGPM(+15.99)GLMGPR.G	Y	37.13	1488.69	15	1	745.351	2	26.92		F28:433	1	84	98	Oxidation (M)	M9:Oxidation (M):28.73
Sample 2	8	19	Uncharacterized protein OS=Gallus gallus GN=SERPINF1 PE=3 SV=1	tr|E1C7H6|E1C7H6_CHICK	R.DDTTGTLLFIGK.I	Y	37.1	1279.67	12	0.6	640.841	2	27.96		F28:449	1	403	414
Sample 2	1	1	Collagen alpha-2(I) chain OS=Gallus gallus GN=COL1A2 PE=4 SV=1	tr|F1P0H9|F1P0H9_CHICK	K.TLNNQIETLLTPEGSK.K	Y	31.33	1756.92	16	1.4	879.469	2	28.04		F28:451	1	1136	1151
Sample 2	3	6	Apolipoprotein A-I OS=Gallus gallus GN=APOA1 PE=1 SV=2	P08250|APOA1_CHICK	R.LISFLDELQK.S	Y	35.12	1204.67	10	0.7	603.343	2	30.39		F28:474	2	252	261
Sample 2	6	7	Uncharacterized protein OS=Gallus gallus GN=AHSG PE=4 SV=1	tr|E1BZE1|E1BZE1_CHICK	K.NPDVY(+15.99)LM(+15.99)LLEIGR.A	Y	17.64	1563.8	13	1.2	782.907	2	35.57		F28:523	1	172	184	Oxidation or Hydroxylation; Oxidation (M)	Y5:Oxidation or Hydroxylation:8.26;M7:Oxidation (M):1000.00
