# Supplementary material for: Bone protein “extractomics”: comparing the efficiency of bone protein extractions of Gallus gallus in tandem mass spectrometry, with an eye towards paleoproteomics
Source: PeerJ. 2016 Oct 27;4:e2603. doi: 10.7717/peerj.2603 (PMC5088622; doi:10.7717/peerj.2603)
Supplement: Table S19 [file peerj-04-2603-s023.xlsx]

## Sheet: Peptides
Table S19. Peptides identified in samples from Method 4, dialyzed ABC (20 mL/g), post-HCl (20-H/ABC-D) @ 1% FDR
Sample #	Protein Group	Protein ID	Protein Description	Protein Accession	Peptide	Unique	-10lgP	Mass	Length	ppm	m/z	z	RT	Area	Scan	#Spec	Start	End	PTM	AScore
Sample 1	2	4	Collagen alpha-1(I) chain OS=Gallus gallus GN=COL1A1 PE=1 SV=3	P02457|CO1A1_CHICK	R.GAP(+15.99)GPP(+15.99)GAVGAAGKDGEAGAQGPPGPTGPAGER.G	Y	38.46	2839.35	33	1.8	947.458	3	13.9		F1:163	2	588	620	Oxidation or Hydroxylation	P3:Oxidation or Hydroxylation:14.04;P6:Oxidation or Hydroxylation:17.01
Sample 1	1	1	Collagen alpha-2(I) chain OS=Gallus gallus GN=COL1A2 PE=4 SV=1	tr|F1P0H9|F1P0H9_CHICK	R.GASGPVGAKGPN(+.98)GDAGR(+15.99)PGEP(+15.99)GLMGPR.G	Y	40.87	2491.19	27	1	623.805	4	14.14		F1:171	1	423	449	Deamidation (NQ); Oxidation or Hydroxylation	N12:Deamidation (NQ):1000.00;R17:Oxidation or Hydroxylation:14.02;P21:Oxidation or Hydroxylation:0.00
Sample 1	1	1	Collagen alpha-2(I) chain OS=Gallus gallus GN=COL1A2 PE=4 SV=1	tr|F1P0H9|F1P0H9_CHICK	R.GASGPVGAKGPN(+.98)GDAGRP(+15.99)GEPGLMGPR(+15.99).G	Y	37.27	2491.19	27	0.5	831.403	3	14.19		F1:173	1	423	449	Deamidation (NQ); Oxidation or Hydroxylation	N12:Deamidation (NQ):1000.00;P18:Oxidation or Hydroxylation:12.33;R27:Oxidation or Hydroxylation:0.00
Sample 1	8	66	Alpha 1 type II procollagen (Fragment) OS=Gallus gallus GN=COL2A1 PE=4 SV=1	tr|Q7T2Z7|Q7T2Z7_CHICK	R.GAPGERGEPGM(sub A)PGPAGFAGPP(+15.99)GADGQP(+15.99)GAK.G	Y	24.97	2718.25	30	-6.1	907.084	3	14.67		F1:189	2	601	630	Oxidation or Hydroxylation; Mutation	P21:Oxidation or Hydroxylation:12.28;P27:Oxidation or Hydroxylation:68.31
Sample 1	8	67	Collagen alpha-1(II) chain (Fragment) OS=Gallus gallus GN=COL2A1 PE=4 SV=2	tr|H9L2B7|H9L2B7_CHICK	R.GAPGERGEPGM(sub A)PGPAGFAGPP(+15.99)GADGQP(+15.99)GAK.G	Y	24.97	2718.25	30	-6.1	907.084	3	14.67		F1:189	2	640	669	Oxidation or Hydroxylation; Mutation	P21:Oxidation or Hydroxylation:12.28;P27:Oxidation or Hydroxylation:68.31
Sample 1	8	68	Alpha 1 type IIA collagen OS=Gallus gallus GN=COL2A1 PE=2 SV=1	tr|Q90W37|Q90W37_CHICK	R.GAPGERGEPGM(sub A)PGPAGFAGPP(+15.99)GADGQP(+15.99)GAK.G	Y	24.97	2718.25	30	-6.1	907.084	3	14.67		F1:189	2	752	781	Oxidation or Hydroxylation; Mutation	P21:Oxidation or Hydroxylation:12.28;P27:Oxidation or Hydroxylation:68.31
Sample 1	1	1	Collagen alpha-2(I) chain OS=Gallus gallus GN=COL1A2 PE=4 SV=1	tr|F1P0H9|F1P0H9_CHICK	R.GLHGEFGVPGPAGPR(+15.99)GER.G	Y	31.74	1804.9	18	0.6	602.64	3	14.75		F1:192	1	573	590	Oxidation or Hydroxylation	R15:Oxidation or Hydroxylation:0.00
Sample 1	1	1	Collagen alpha-2(I) chain OS=Gallus gallus GN=COL1A2 PE=4 SV=1	tr|F1P0H9|F1P0H9_CHICK	R.GLHGEFGVP(+15.99)GPAGPRGER.G	Y	24.26	1804.9	18	0.7	903.456	2	14.87		F1:196	2	573	590	Oxidation or Hydroxylation	P9:Oxidation or Hydroxylation:0.00
Sample 1	1	1	Collagen alpha-2(I) chain OS=Gallus gallus GN=COL1A2 PE=4 SV=1	tr|F1P0H9|F1P0H9_CHICK	R.GPSGPPGP(+15.99)DGNKGEP(+15.99)GNVGPAGAP(+15.99)GPAGPGGIP(+15.99)GER.G	Y	33.85	3191.49	36	1.4	1064.84	3	14.94		F1:198	1	609	644	Oxidation or Hydroxylation	P8:Oxidation or Hydroxylation:9.45;P15:Oxidation or Hydroxylation:29.28;P24:Oxidation or Hydroxylation:44.61;P33:Oxidation or Hydroxylation:83.89
Sample 1	1	1	Collagen alpha-2(I) chain OS=Gallus gallus GN=COL1A2 PE=4 SV=1	tr|F1P0H9|F1P0H9_CHICK	R.GPP(+15.99)GP(+15.99)SGPPGKDGRN(+.98)GLP(+15.99)GPIGPAGVR.G	Y	28.79	2509.27	27	0.1	628.324	4	15.3		F1:210	1	1053	1079	Oxidation or Hydroxylation; Deamidation (NQ)	P3:Oxidation or Hydroxylation:8.69;P5:Oxidation or Hydroxylation:0.00;N15:Deamidation (NQ):1000.00;P18:Oxidation or Hydroxylation:32.28
Sample 1	2	4	Collagen alpha-1(I) chain OS=Gallus gallus GN=COL1A1 PE=1 SV=3	P02457|CO1A1_CHICK	R.GFP(+15.99)GADGIAGPKGPPGER(+15.99).G	Y	36.3	1710.83	18	0.9	856.424	2	15.42		F1:214	1	483	500	Oxidation or Hydroxylation	P3:Oxidation or Hydroxylation:17.01;R18:Oxidation or Hydroxylation:0.00
Sample 1	1	1	Collagen alpha-2(I) chain OS=Gallus gallus GN=COL1A2 PE=4 SV=1	tr|F1P0H9|F1P0H9_CHICK	R.VGP(+15.99)P(+15.99)GPAGITGPP(+15.99)GPPGP(+15.99)AGK.D	Y	23.37	1840.93	21	1.4	921.475	2	15.51		F1:217	1	794	814	Oxidation or Hydroxylation	P3:Oxidation or Hydroxylation:18.00;P4:Oxidation or Hydroxylation:18.53;P13:Oxidation or Hydroxylation:7.21;P18:Oxidation or Hydroxylation:0.00
Sample 1	1	1	Collagen alpha-2(I) chain OS=Gallus gallus GN=COL1A2 PE=4 SV=1	tr|F1P0H9|F1P0H9_CHICK	R.VGN(sub P)P(+15.99)GPAGITGPP(+15.99)GPP(+15.99)GPAGK.D	Y	15.88	1841.93	21	5	921.975	2	15.87		F1:230	2	794	814	Oxidation or Hydroxylation; Mutation	P4:Oxidation or Hydroxylation:10.11;P13:Oxidation or Hydroxylation:10.11;P16:Oxidation or Hydroxylation:14.02
Sample 1	1	1	Collagen alpha-2(I) chain OS=Gallus gallus GN=COL1A2 PE=4 SV=1	tr|F1P0H9|F1P0H9_CHICK	R.GPP(+15.99)GPSGPPGKDGRN(+.98)GLP(+15.99)GPIGPAGVR.G	Y	34.29	2493.27	27	0.7	624.326	4	16.02		F1:235	7	1053	1079	Oxidation or Hydroxylation; Deamidation (NQ)	P3:Oxidation or Hydroxylation:17.01;N15:Deamidation (NQ):1000.00;P18:Oxidation or Hydroxylation:14.04
Sample 1	1	1	Collagen alpha-2(I) chain OS=Gallus gallus GN=COL1A2 PE=4 SV=1	tr|F1P0H9|F1P0H9_CHICK	R.GPP(+15.99)GPSGPPGKDGRN(+.98)GLPGPIGPAGVR(+15.99).G	Y	28.24	2493.27	27	1.8	832.1	3	16.1		F1:238	1	1053	1079	Oxidation or Hydroxylation; Deamidation (NQ)	P3:Oxidation or Hydroxylation:17.01;N15:Deamidation (NQ):1000.00;R27:Oxidation or Hydroxylation:0.00
Sample 1	1	1	Collagen alpha-2(I) chain OS=Gallus gallus GN=COL1A2 PE=4 SV=1	tr|F1P0H9|F1P0H9_CHICK	R.GLP(+15.99)GAIGAP(+15.99)GPAGGAGDRGEGGPAGPAGPAGAR.G	Y	36.03	2724.33	33	1.8	1363.18	2	16.13		F1:239	8	675	707	Oxidation or Hydroxylation	P3:Oxidation or Hydroxylation:19.61;P9:Oxidation or Hydroxylation:11.10
Sample 1	2	4	Collagen alpha-1(I) chain OS=Gallus gallus GN=COL1A1 PE=1 SV=3	P02457|CO1A1_CHICK	K.Q(+42.01)GPSGASGERGP(+15.99)PGPMGPPGLAGPP(+15.99)GEAGR.E	Y	14.54	2768.29	30	0.8	923.773	3	16.43		F1:249	1	974	1003	Acetylation (N-term); Oxidation or Hydroxylation	Q1:Acetylation (N-term):1000.00;P12:Oxidation or Hydroxylation:0.00;P25:Oxidation or Hydroxylation:0.00
Sample 1	1	1	Collagen alpha-2(I) chain OS=Gallus gallus GN=COL1A2 PE=4 SV=1	tr|F1P0H9|F1P0H9_CHICK	K.GEIGPAGNVGPTGPAGPR.G	Y	44.31	1602.81	18	1.1	802.414	2	16.53		F1:252	2	264	281
Sample 1	1	1	Collagen alpha-2(I) chain OS=Gallus gallus GN=COL1A2 PE=4 SV=1	tr|F1P0H9|F1P0H9_CHICK	R.GLHGEFGVP(+15.99)GPAGPR.G	Y	44.42	1462.73	15	1.1	732.374	2	16.55		F1:253	4	573	587	Oxidation or Hydroxylation	P9:Oxidation or Hydroxylation:39.76
Sample 1	1	1	Collagen alpha-2(I) chain OS=Gallus gallus GN=COL1A2 PE=4 SV=1	tr|F1P0H9|F1P0H9_CHICK	K.EGPVGFP(+15.99)GADGR.V	Y	37.15	1173.54	12	0.5	587.778	2	16.58	36400000	F1:254	3	464	475	Oxidation or Hydroxylation	P7:Oxidation or Hydroxylation:8.69
Sample 1	2	4	Collagen alpha-1(I) chain OS=Gallus gallus GN=COL1A1 PE=1 SV=3	P02457|CO1A1_CHICK	R.GLTGPIGPP(+15.99)GPAGAP(+15.99)GDKGEAGPP(+15.99)GPAGPTGAR.G	Y	49.02	2878.42	33	1.8	960.483	3	16.77	544000000	F1:261	14	753	785	Oxidation or Hydroxylation	P9:Oxidation or Hydroxylation:59.30;P15:Oxidation or Hydroxylation:78.16;P24:Oxidation or Hydroxylation:67.12
Sample 1	2	4	Collagen alpha-1(I) chain OS=Gallus gallus GN=COL1A1 PE=1 SV=3	P02457|CO1A1_CHICK	R.GPP(+15.99)GPMGPP(+15.99)GLAGPP(+15.99)GEAGR.E	Y	37.57	1815.86	20	1.5	908.937	2	17.11		F1:273	2	984	1003	Oxidation or Hydroxylation	P3:Oxidation or Hydroxylation:26.31;P9:Oxidation or Hydroxylation:10.11;P15:Oxidation or Hydroxylation:3.97
Sample 1	2	4	Collagen alpha-1(I) chain OS=Gallus gallus GN=COL1A1 PE=1 SV=3	P02457|CO1A1_CHICK	R.GFP(+15.99)GADGIAGPK.G	Y	31.37	1101.55	12	0.8	551.78	2	17.36		F1:282	2	483	494	Oxidation or Hydroxylation	P3:Oxidation or Hydroxylation:7.65
Sample 1	1	1	Collagen alpha-2(I) chain OS=Gallus gallus GN=COL1A2 PE=4 SV=1	tr|F1P0H9|F1P0H9_CHICK	R.GLP(+15.99)GESGAVGPAGPIGSR.G	Y	28.89	1593.81	18	1.4	797.914	2	17.81	292000000	F1:297	4	591	608	Oxidation or Hydroxylation	P3:Oxidation or Hydroxylation:49.35
Sample 1	1	1	Collagen alpha-2(I) chain OS=Gallus gallus GN=COL1A2 PE=4 SV=1	tr|F1P0H9|F1P0H9_CHICK	R.VGPIGPAGNRGEPGN(+15.99)IGFPGPK(+15.99).G	Y	25.5	2119.08	22	0.9	707.368	3	18.37		F1:317	1	476	497	Oxidation or Hydroxylation	N15:Oxidation or Hydroxylation:0.00;K22:Oxidation or Hydroxylation:0.00
Sample 1	2	4	Collagen alpha-1(I) chain OS=Gallus gallus GN=COL1A1 PE=1 SV=3	P02457|CO1A1_CHICK	R.GPP(+15.99)GPMGPPGLAGPP(+15.99)GEAGR.E	Y	38.96	1799.86	20	1.8	900.94	2	18.45		F1:320	2	984	1003	Oxidation or Hydroxylation	P3:Oxidation or Hydroxylation:7.21;P15:Oxidation or Hydroxylation:7.21
Sample 1	1	1	Collagen alpha-2(I) chain OS=Gallus gallus GN=COL1A2 PE=4 SV=1	tr|F1P0H9|F1P0H9_CHICK	R.VGPIGPAGNRGEPGN(+15.99)IGFP(+15.99)GPK.G	Y	33.37	2119.08	22	1	707.368	3	18.6		F1:324	1	476	497	Oxidation or Hydroxylation	N15:Oxidation or Hydroxylation:0.00;P19:Oxidation or Hydroxylation:14.02
Sample 1	1	1	Collagen alpha-2(I) chain OS=Gallus gallus GN=COL1A2 PE=4 SV=1	tr|F1P0H9|F1P0H9_CHICK	R.VGPIGPAGNRGEP(+15.99)GNIGFP(+15.99)GPK.G	Y	36.42	2119.08	22	1.2	1060.55	2	18.65		F1:326	3	476	497	Oxidation or Hydroxylation	P13:Oxidation or Hydroxylation:8.22;P19:Oxidation or Hydroxylation:0.00
Sample 1	2	4	Collagen alpha-1(I) chain OS=Gallus gallus GN=COL1A1 PE=1 SV=3	P02457|CO1A1_CHICK	R.GQAGVMGFPGPK(+15.99).G	Y	38.11	1160.56	12	0.8	581.29	2	18.87		F1:334	1	564	575	Oxidation or Hydroxylation	K12:Oxidation or Hydroxylation:0.00
Sample 1	2	4	Collagen alpha-1(I) chain OS=Gallus gallus GN=COL1A1 PE=1 SV=3	P02457|CO1A1_CHICK	R.GQAGVM(+15.99)GFPGP(+15.99)K.G	Y	34.13	1176.56	12	0.3	589.287	2	19.04		F1:340	1	564	575	Oxidation (M); Oxidation or Hydroxylation	M6:Oxidation (M):1000.00;P11:Oxidation or Hydroxylation:0.00
Sample 1	1	1	Collagen alpha-2(I) chain OS=Gallus gallus GN=COL1A2 PE=4 SV=1	tr|F1P0H9|F1P0H9_CHICK	K.GAAGLP(+15.99)GVAGAP(+15.99)GLPGPR(+15.99).G	Y	39.18	1561.82	18	1.1	781.919	2	19.1	392000000	F1:342	6	309	326	Oxidation or Hydroxylation	P6:Oxidation or Hydroxylation:137.20;P12:Oxidation or Hydroxylation:37.54;R18:Oxidation or Hydroxylation:5.08
Sample 1	2	4	Collagen alpha-1(I) chain OS=Gallus gallus GN=COL1A1 PE=1 SV=3	P02457|CO1A1_CHICK	R.GQAGVMGFP(+15.99)GPK.G	Y	40.47	1160.56	12	0.7	581.29	2	19.13		F1:343	3	564	575	Oxidation or Hydroxylation	P9:Oxidation or Hydroxylation:12.81
Sample 1	1	1	Collagen alpha-2(I) chain OS=Gallus gallus GN=COL1A2 PE=4 SV=1	tr|F1P0H9|F1P0H9_CHICK	K.GPK(+15.99)GETGPTGAIGPIGASGPP(+15.99)GPVGAAGPAGPR.G	Y	51.76	2836.45	33	1.5	946.491	3	19.2	102000000	F1:346	1	744	776	Oxidation or Hydroxylation	K3:Oxidation or Hydroxylation:0.00;P21:Oxidation or Hydroxylation:11.06
Sample 1	1	1	Collagen alpha-2(I) chain OS=Gallus gallus GN=COL1A2 PE=4 SV=1	tr|F1P0H9|F1P0H9_CHICK	K.GPKGETGPTGAIGPIGASGPP(+15.99)GPVGAAGPAGPR.G	Y	47.55	2820.45	33	1	941.159	3	19.37	70100000	F1:352	3	744	776	Oxidation or Hydroxylation	P21:Oxidation or Hydroxylation:93.15
Sample 1	2	4	Collagen alpha-1(I) chain OS=Gallus gallus GN=COL1A1 PE=1 SV=3	P02457|CO1A1_CHICK	R.GFP(+15.99)GLP(+15.99)GPSGEPGK.Q	N	32.56	1327.64	14	0.8	664.828	2	19.45	53000000	F1:355	4	960	973	Oxidation or Hydroxylation	P3:Oxidation or Hydroxylation:14.02;P6:Oxidation or Hydroxylation:45.01
Sample 1	8	66	Alpha 1 type II procollagen (Fragment) OS=Gallus gallus GN=COL2A1 PE=4 SV=1	tr|Q7T2Z7|Q7T2Z7_CHICK	R.GFP(+15.99)GLP(+15.99)GPSGEPGK.Q	N	32.56	1327.64	14	0.8	664.828	2	19.45	53000000	F1:355	4	775	788	Oxidation or Hydroxylation	P3:Oxidation or Hydroxylation:14.02;P6:Oxidation or Hydroxylation:45.01
Sample 1	8	67	Collagen alpha-1(II) chain (Fragment) OS=Gallus gallus GN=COL2A1 PE=4 SV=2	tr|H9L2B7|H9L2B7_CHICK	R.GFP(+15.99)GLP(+15.99)GPSGEPGK.Q	N	32.56	1327.64	14	0.8	664.828	2	19.45	53000000	F1:355	4	814	827	Oxidation or Hydroxylation	P3:Oxidation or Hydroxylation:14.02;P6:Oxidation or Hydroxylation:45.01
Sample 1	8	68	Alpha 1 type IIA collagen OS=Gallus gallus GN=COL2A1 PE=2 SV=1	tr|Q90W37|Q90W37_CHICK	R.GFP(+15.99)GLP(+15.99)GPSGEPGK.Q	N	32.56	1327.64	14	0.8	664.828	2	19.45	53000000	F1:355	4	926	939	Oxidation or Hydroxylation	P3:Oxidation or Hydroxylation:14.02;P6:Oxidation or Hydroxylation:45.01
Sample 1	1	1	Collagen alpha-2(I) chain OS=Gallus gallus GN=COL1A2 PE=4 SV=1	tr|F1P0H9|F1P0H9_CHICK	R.VGPIGPAGN(+.98)RGEPGN(+15.99)IGF(+15.99)PGPK.G	Y	27.33	2120.06	22	0.6	707.696	3	19.48	81700000	F1:356	1	476	497	Deamidation (NQ); Oxidation or Hydroxylation	N9:Deamidation (NQ):6.67;N15:Oxidation or Hydroxylation:0.00;F18:Oxidation or Hydroxylation:8.69
Sample 1	1	1	Collagen alpha-2(I) chain OS=Gallus gallus GN=COL1A2 PE=4 SV=1	tr|F1P0H9|F1P0H9_CHICK	R.VGPIGPAGN(+.98)RGEP(+15.99)GNIGFP(+15.99)GPK.G	Y	30	2120.06	22	1.2	707.696	3	19.61	81700000	F1:360	1	476	497	Deamidation (NQ); Oxidation or Hydroxylation	N9:Deamidation (NQ):6.67;P13:Oxidation or Hydroxylation:0.00;P19:Oxidation or Hydroxylation:0.00
Sample 1	1	1	Collagen alpha-2(I) chain OS=Gallus gallus GN=COL1A2 PE=4 SV=1	tr|F1P0H9|F1P0H9_CHICK	R.GEIGLP(+15.99)GSSGPVGPP(+15.99)GNP(+15.99)GAN(+.98)GLPGAK(+15.99).G	Y	29.49	2418.17	27	0.3	1210.09	2	19.83		F1:367	2	282	308	Oxidation or Hydroxylation; Deamidation (NQ)	P6:Oxidation or Hydroxylation:62.80;P15:Oxidation or Hydroxylation:0.00;P18:Oxidation or Hydroxylation:40.00;N21:Deamidation (NQ):31.56;K27:Oxidation or Hydroxylation:0.00
Sample 1	4	7	Uncharacterized protein OS=Gallus gallus GN=AHSG PE=4 SV=1	tr|E1BZE1|E1BZE1_CHICK	K.VN(+.98)GQFSVLASK.C	Y	40.01	1149.6	11	0.9	575.809	2	20.74		F1:397	3	118	128	Deamidation (NQ)	N2:Deamidation (NQ):36.05
Sample 1	1	1	Collagen alpha-2(I) chain OS=Gallus gallus GN=COL1A2 PE=4 SV=1	tr|F1P0H9|F1P0H9_CHICK	R.N(+.98)GLP(+15.99)GPIGPAGVR.G	Y	37.31	1220.65	13	0.8	611.333	2	21.04		F1:407	5	1067	1079	Deamidation (NQ); Oxidation or Hydroxylation	N1:Deamidation (NQ):1000.00;P4:Oxidation or Hydroxylation:55.92
Sample 1	6	6	Apolipoprotein A-I OS=Gallus gallus GN=APOA1 PE=1 SV=2	P08250|APOA1_CHICK	K.LADNLDTLSAAAAK.L	Y	41.78	1372.72	14	0.8	687.368	2	21.28		F1:414	3	69	82
Sample 1	6	6	Apolipoprotein A-I OS=Gallus gallus GN=APOA1 PE=1 SV=2	P08250|APOA1_CHICK	K.ASGKDAIAQFESSAVGK.Q	Y	39.92	1664.84	17	1.5	833.427	2	21.4		F1:418	3	47	63
Sample 1	1	1	Collagen alpha-2(I) chain OS=Gallus gallus GN=COL1A2 PE=4 SV=1	tr|F1P0H9|F1P0H9_CHICK	K.GETGPTGAIGPIGASGP(+15.99)PGPVGAAGPAGPR.G	Y	31.49	2538.28	30	1.1	847.102	3	21.58		F1:423	3	747	776	Oxidation or Hydroxylation	P17:Oxidation or Hydroxylation:0.00
Sample 1	1	1	Collagen alpha-2(I) chain OS=Gallus gallus GN=COL1A2 PE=4 SV=1	tr|F1P0H9|F1P0H9_CHICK	K.GETGPTGAIGPIGASGPP(+15.99)GPVGAAGPAGPR.G	Y	42.09	2538.28	30	1.8	1270.15	2	21.61		F1:424	3	747	776	Oxidation or Hydroxylation	P18:Oxidation or Hydroxylation:36.25
Sample 1	1	1	Collagen alpha-2(I) chain OS=Gallus gallus GN=COL1A2 PE=4 SV=1	tr|F1P0H9|F1P0H9_CHICK	K.GPKGETGPTGAIGPIGASGPP(+15.99)GPVGAAGPAGPRGDAGPPGM(+15.99)TGFP(+15.99)GAAGR.V	Y	52.17	4349.12	50	2.4	1088.29	4	21.66		F1:426	1	744	793	Oxidation or Hydroxylation; Oxidation (M)	P21:Oxidation or Hydroxylation:63.64;M41:Oxidation (M):1000.00;P45:Oxidation or Hydroxylation:129.21
Sample 1	1	1	Collagen alpha-2(I) chain OS=Gallus gallus GN=COL1A2 PE=4 SV=1	tr|F1P0H9|F1P0H9_CHICK	R.GFP(+15.99)GTP(+15.99)GLP(+15.99)GFK.G	Y	35.52	1221.6	12	0.7	611.809	2	22.13		F1:441	2	165	176	Oxidation or Hydroxylation	P3:Oxidation or Hydroxylation:12.28;P6:Oxidation or Hydroxylation:38.32;P9:Oxidation or Hydroxylation:0.00
Sample 1	6	6	Apolipoprotein A-I OS=Gallus gallus GN=APOA1 PE=1 SV=2	P08250|APOA1_CHICK	R.IR(+15.99)DMVDVYLETVK.A	Y	34.03	1595.82	13	0.5	532.948	3	22.3		F1:447	2	34	46	Oxidation or Hydroxylation	R2:Oxidation or Hydroxylation:0.00
Sample 1	1	1	Collagen alpha-2(I) chain OS=Gallus gallus GN=COL1A2 PE=4 SV=1	tr|F1P0H9|F1P0H9_CHICK	R.GDPGPVGPVGPAGAFGPR.G	Y	47.74	1603.81	18	1.3	802.914	2	22.4		F1:450	4	978	995
Sample 1	1	1	Collagen alpha-2(I) chain OS=Gallus gallus GN=COL1A2 PE=4 SV=1	tr|F1P0H9|F1P0H9_CHICK	R.GLP(+15.99)GIAGATGEP(+15.99)GPLGVSGP(+15.99)PGAR.G	Y	39.75	2132.09	24	1.2	1067.05	2	22.66		F1:459	7	882	905	Oxidation or Hydroxylation	P3:Oxidation or Hydroxylation:156.90;P12:Oxidation or Hydroxylation:26.31;P20:Oxidation or Hydroxylation:0.00
Sample 1	1	1	Collagen alpha-2(I) chain OS=Gallus gallus GN=COL1A2 PE=4 SV=1	tr|F1P0H9|F1P0H9_CHICK	R.GLP(+15.99)GIAGATGEP(+15.99)GPLGVSGPPGAR(+15.99).G	Y	45.22	2132.09	24	1.3	1067.05	2	23.34		F1:477	5	882	905	Oxidation or Hydroxylation	P3:Oxidation or Hydroxylation:195.68;P12:Oxidation or Hydroxylation:60.92;R24:Oxidation or Hydroxylation:0.00
Sample 1	1	1	Collagen alpha-2(I) chain OS=Gallus gallus GN=COL1A2 PE=4 SV=1	tr|F1P0H9|F1P0H9_CHICK	R.GLP(+15.99)GIAGATGEP(+15.99)GPLGVSGPP(+15.99)GAR.G	Y	33.36	2132.09	24	0.7	711.703	3	23.37		F1:478	1	882	905	Oxidation or Hydroxylation	P3:Oxidation or Hydroxylation:73.38;P12:Oxidation or Hydroxylation:0.00;P21:Oxidation or Hydroxylation:0.00
Sample 1	1	1	Collagen alpha-2(I) chain OS=Gallus gallus GN=COL1A2 PE=4 SV=1	tr|F1P0H9|F1P0H9_CHICK	K.GETGPTGAIGPIGASGP(+15.99)PGPVGAAGP(+15.99)AGPRGDAGPPGMTGFP(+15.99)GAAGR.V	Y	26.47	4066.96	47	1.1	1017.75	4	23.4		F1:479	1	747	793	Oxidation or Hydroxylation	P17:Oxidation or Hydroxylation:0.00;P26:Oxidation or Hydroxylation:0.00;P42:Oxidation or Hydroxylation:0.00
Sample 1	1	1	Collagen alpha-2(I) chain OS=Gallus gallus GN=COL1A2 PE=4 SV=1	tr|F1P0H9|F1P0H9_CHICK	K.GETGPTGAIGPIGASGP(+15.99)PGPVGAAGPAGPRGDAGP(+15.99)PGMTGFP(+15.99)GAAGR.V	Y	41.05	4066.96	47	1.5	1356.66	3	23.44		F1:480	1	747	793	Oxidation or Hydroxylation	P17:Oxidation or Hydroxylation:0.00;P35:Oxidation or Hydroxylation:0.00;P42:Oxidation or Hydroxylation:0.00
Sample 1	1	1	Collagen alpha-2(I) chain OS=Gallus gallus GN=COL1A2 PE=4 SV=1	tr|F1P0H9|F1P0H9_CHICK	R.GLP(+15.99)GIAGATGEPGPLGVSGP(+15.99)PGAR.G	Y	31.24	2116.09	24	1.7	1059.05	2	23.93		F1:486	1	882	905	Oxidation or Hydroxylation	P3:Oxidation or Hydroxylation:100.79;P20:Oxidation or Hydroxylation:0.00
Sample 1	4	7	Uncharacterized protein OS=Gallus gallus GN=AHSG PE=4 SV=1	tr|E1BZE1|E1BZE1_CHICK	K.M(+15.99)VTEPSQDLIAEC(+57.02)QLYGHQPGVTYPHPGQDTSAGLVPSAGQGFTNHNLK.I	Y	14.03	5262.48	49	2	1053.5	5	24.28		F1:496	1	235	283	Oxidation (M); Carbamidomethylation	M1:Oxidation (M):1000.00;C13:Carbamidomethylation:1000.00
Sample 1	4	7	Uncharacterized protein OS=Gallus gallus GN=AHSG PE=4 SV=1	tr|E1BZE1|E1BZE1_CHICK	K.MVTEPSQDLIAEC(+57.02)QLYGHQPGVTYPHPGQDTSAGLVPSAGQGFTN(+.98)HNLK.I	Y	16.35	5247.47	49	1.3	1050.5	5	24.88		F1:513	2	235	283	Carbamidomethylation; Deamidation (NQ)	C13:Carbamidomethylation:1000.00;N45:Deamidation (NQ):33.81
Sample 1	4	7	Uncharacterized protein OS=Gallus gallus GN=AHSG PE=4 SV=1	tr|E1BZE1|E1BZE1_CHICK	K.MVTEPSQDLIAEC(+57.02)QLYGHQPGVTYPHPGQDTSAGLVPSAGQ(+.98)GFTNHNLK.I	Y	22.94	5247.47	49	-0.2	875.585	6	24.9		F1:514	1	235	283	Carbamidomethylation; Deamidation (NQ)	C13:Carbamidomethylation:1000.00;Q41:Deamidation (NQ):95.81
Sample 1	5	3	Serum albumin OS=Gallus gallus GN=ALB PE=1 SV=2	P19121|ALBU_CHICK	K.TIADGFTAMVDK.C	Y	40.77	1267.61	12	0.7	634.814	2	25.31		F1:524	2	574	585
Sample 1	1	1	Collagen alpha-2(I) chain OS=Gallus gallus GN=COL1A2 PE=4 SV=1	tr|F1P0H9|F1P0H9_CHICK	A.Q(-17.03)YDPSK(+15.99)AADFGPGPMGLMGPR(+15.99).G	Y	21.76	2205.98	21	1.6	1104	2	25.74		F1:534	2	78	98	Pyro-glu from Q; Oxidation or Hydroxylation	Q1:Pyro-glu from Q:1000.00;K6:Oxidation or Hydroxylation:8.22;R21:Oxidation or Hydroxylation:0.00
Sample 1	4	7	Uncharacterized protein OS=Gallus gallus GN=AHSG PE=4 SV=1	tr|E1BZE1|E1BZE1_CHICK	K.ISHNNPVASESS(+79.97)SSEFPSLLSAK.S	Y	21.65	2467.13	23	0.3	823.383	3	25.79		F1:535	1	284	306	Phosphorylation (STY)	S12:Phosphorylation (STY):0.00
Sample 1	2	4	Collagen alpha-1(I) chain OS=Gallus gallus GN=COL1A1 PE=1 SV=3	P02457|CO1A1_CHICK	K.SGEYWIDPNQGCNLD(+57.02)AIK.V	Y	27.26	2078.94	18	0.9	1040.48	2	26.11		F1:541	1	1260	1277	Carbamidomethylation (DHKE X@N-term)	D15:Carbamidomethylation (DHKE X@N-term):0.00
Sample 1	1	1	Collagen alpha-2(I) chain OS=Gallus gallus GN=COL1A2 PE=4 SV=1	tr|F1P0H9|F1P0H9_CHICK	G.ILGAP(+15.99)GILGLPGSR(+15.99).G	Y	27.7	1351.78	14	0.9	676.899	2	26.54		F1:549	1	865	878	Oxidation or Hydroxylation	P5:Oxidation or Hydroxylation:151.86;R14:Oxidation or Hydroxylation:0.00
Sample 1	2	4	Collagen alpha-1(I) chain OS=Gallus gallus GN=COL1A1 PE=1 SV=3	P02457|CO1A1_CHICK	K.ALLLQGANEIEIR.A	Y	39.26	1438.81	13	0.8	720.415	2	26.6		F1:551	2	1376	1388
Sample 1	7	19	Uncharacterized protein OS=Gallus gallus GN=SERPINF1 PE=3 SV=1	tr|E1C7H6|E1C7H6_CHICK	R.LQSLFTSPDFTK.I	Y	35.79	1382.71	12	0.4	692.362	2	26.66		F1:553	2	337	348
Sample 1	1	1	Collagen alpha-2(I) chain OS=Gallus gallus GN=COL1A2 PE=4 SV=1	tr|F1P0H9|F1P0H9_CHICK	K.AADFGPGPMGLMGPR.G	Y	48.05	1472.69	15	1.3	737.354	2	26.85		F1:558	4	84	98
Sample 1	1	1	Collagen alpha-2(I) chain OS=Gallus gallus GN=COL1A2 PE=4 SV=1	tr|F1P0H9|F1P0H9_CHICK	K.AADFGPGPM(+15.99)GLM(+15.99)GPR.G	Y	46.53	1504.68	15	1.3	753.348	2	26.94		F1:561	2	84	98	Oxidation (M)	M9:Oxidation (M):1000.00;M12:Oxidation (M):1000.00
Sample 1	1	1	Collagen alpha-2(I) chain OS=Gallus gallus GN=COL1A2 PE=4 SV=1	tr|F1P0H9|F1P0H9_CHICK	K.AADFGPGPM(+15.99)GLMGPR.G	Y	36.39	1488.69	15	1.1	745.351	2	27.01		F1:563	1	84	98	Oxidation (M)	M9:Oxidation (M):20.50
Sample 1	3	8	SPARC OS=Gallus gallus GN=SPARC PE=4 SV=1	tr|F1P291|F1P291_CHICK	K.NVLITLYERDEDNNLLTEK.Q	Y	35.77	2291.16	19	1.2	764.73	3	27.4		F1:574	6	168	186
Sample 1	1	1	Collagen alpha-2(I) chain OS=Gallus gallus GN=COL1A2 PE=4 SV=1	tr|F1P0H9|F1P0H9_CHICK	K.GPSGEAGAAGP(+15.99)PGTP(+15.99)GPQGILGAP(+15.99)GILGLP(+15.99)GSR.G	Y	27.68	2926.48	33	2	1464.25	2	27.59		F1:580	1	846	878	Oxidation or Hydroxylation	P11:Oxidation or Hydroxylation:0.00;P15:Oxidation or Hydroxylation:14.04;P24:Oxidation or Hydroxylation:45.63;P30:Oxidation or Hydroxylation:0.00
Sample 1	5	3	Serum albumin OS=Gallus gallus GN=ALB PE=1 SV=2	P19121|ALBU_CHICK	K.LLINLIK.R	Y	16.96	825.569	7	1.7	413.792	2	27.96		F1:589	2	556	562
Sample 1	7	19	Uncharacterized protein OS=Gallus gallus GN=SERPINF1 PE=3 SV=1	tr|E1C7H6|E1C7H6_CHICK	R.DDTTGTLLFIGK.I	Y	40.37	1279.67	12	0.2	640.84	2	28		F1:590	1	403	414
Sample 1	4	7	Uncharacterized protein OS=Gallus gallus GN=AHSG PE=4 SV=1	tr|E1BZE1|E1BZE1_CHICK	K.DNLAAC(+57.02)QLLPEDQSNFGFC(+57.02)TAK.M	Y	22.58	2498.12	22	2	1250.07	2	28.26		F1:595	3	213	234	Carbamidomethylation	C6:Carbamidomethylation:1000.00;C19:Carbamidomethylation:1000.00
Sample 1	1	1	Collagen alpha-2(I) chain OS=Gallus gallus GN=COL1A2 PE=4 SV=1	tr|F1P0H9|F1P0H9_CHICK	A.Q(-17.03)YDPSK(+15.99)AADFGPGPMGLMGPR.G	Y	33.18	2189.99	21	-0.5	1096	2	28.83		F1:606	5	78	98	Pyro-glu from Q; Oxidation or Hydroxylation	Q1:Pyro-glu from Q:1000.00;K6:Oxidation or Hydroxylation:17.01
Sample 1	6	6	Apolipoprotein A-I OS=Gallus gallus GN=APOA1 PE=1 SV=2	P08250|APOA1_CHICK	R.LISFLDELQK.S	Y	31.86	1204.67	10	0.8	603.343	2	30.5		F1:639	1	252	261
Sample 1	3	8	SPARC OS=Gallus gallus GN=SPARC PE=4 SV=1	tr|F1P291|F1P291_CHICK	K.NYNMYIFPVHWQFGQLD(+15.99)QHPIDGYLSHTELAPLRAPLIPMEHC(+57.02)TTR.F	Y	29.85	5521.66	46	1	921.285	6	31.36		F1:658	1	218	263	Oxidation or Hydroxylation; Carbamidomethylation	D17:Oxidation or Hydroxylation:0.00;C43:Carbamidomethylation:1000.00
Sample 1	3	8	SPARC OS=Gallus gallus GN=SPARC PE=4 SV=1	tr|F1P291|F1P291_CHICK	K.NYNMYIFPVHWQFGQLDQHPID(+15.99)GYLSHTELAPLRAPLIPMEHC(+57.02)TTR.F	Y	26.98	5521.66	46	0.1	1105.34	5	31.59		F1:661	1	218	263	Oxidation or Hydroxylation; Carbamidomethylation	D22:Oxidation or Hydroxylation:0.00;C43:Carbamidomethylation:1000.00
Sample 1	3	8	SPARC OS=Gallus gallus GN=SPARC PE=4 SV=1	tr|F1P291|F1P291_CHICK	K.NYNMYIFP(+15.99)VHWQFGQLDQHPIDGYLSHTELAPLRAPLIPMEHC(+57.02)TTR.F	Y	13.22	5521.66	46	3.3	789.818	7	31.65		F1:662	1	218	263	Oxidation or Hydroxylation; Carbamidomethylation	P8:Oxidation or Hydroxylation:0.00;C43:Carbamidomethylation:1000.00
Sample 1	3	8	SPARC OS=Gallus gallus GN=SPARC PE=4 SV=1	tr|F1P291|F1P291_CHICK	K.NYNM(+15.99)YIFPVHWQFGQLDQHPIDGYLSHTELAPLR.A	Y	27.41	4114.98	34	-1.3	824.002	5	31.73		F1:664	1	218	251	Oxidation (M)	M4:Oxidation (M):1000.00
Sample 1	7	19	Uncharacterized protein OS=Gallus gallus GN=SERPINF1 PE=3 SV=1	tr|E1C7H6|E1C7H6_CHICK	R.LTFPIEYHVDRPFLLVLR.D	Y	21	2227.25	18	0.3	557.82	4	31.92		F1:669	1	385	402
Sample 1	4	7	Uncharacterized protein OS=Gallus gallus GN=AHSG PE=4 SV=1	tr|E1BZE1|E1BZE1_CHICK	A.PAAPPPPLGC(+57.02)DDPEIEAAAEFAVIYIN(+.98)GHSHHGYR.F	Y	18.66	3768.76	35	-0.5	754.76	5	31.95		F1:670	1	20	54	Carbamidomethylation; Deamidation (NQ)	C10:Carbamidomethylation:1000.00;N27:Deamidation (NQ):1000.00
Sample 1	5	3	Serum albumin OS=Gallus gallus GN=ALB PE=1 SV=2	P19121|ALBU_CHICK	K.YVPPPFNPDMFSFDEK.L	Y	30.63	1928.87	16	1.4	965.441	2	32.14		F1:675	2	525	540
Sample 1	13	36	Uncharacterized protein OS=Gallus gallus GN=OMD PE=4 SV=1	tr|R4GF52|R4GF52_CHICK	K.LTTPISTYAFFC(+57.02)FPHIR.T	Y	21.32	2070.04	17	1.1	691.021	3	32.67		F1:687	1	342	358	Carbamidomethylation	C12:Carbamidomethylation:1000.00
Sample 1	3	8	SPARC OS=Gallus gallus GN=SPARC PE=4 SV=1	tr|F1P291|F1P291_CHICK	K.FIPAC(+57.02)LDTELTEFPLR.M	Y	45.09	1920.97	16	1.1	961.491	2	33.02		F1:693	6	146	161	Carbamidomethylation	C5:Carbamidomethylation:1000.00
Sample 1	3	8	SPARC OS=Gallus gallus GN=SPARC PE=4 SV=1	tr|F1P291|F1P291_CHICK	K.FIP(+31.99)AC(+57.02)LDTELTEFPLR.M	Y	18.02	1952.96	16	-0.2	977.485	2	33.3		F1:700	1	146	161	Dihydroxy; Carbamidomethylation	P3:Dihydroxy:14.04;C5:Carbamidomethylation:1000.00
Sample 1	4	7	Uncharacterized protein OS=Gallus gallus GN=AHSG PE=4 SV=1	tr|E1BZE1|E1BZE1_CHICK	P.AAPPPPLGC(+57.02)DDPEIEAAAEFAVIYIN(+.98)GHSHHGYR.F	Y	46.25	3671.71	34	2.3	735.351	5	33.45		F1:703	3	21	54	Carbamidomethylation; Deamidation (NQ)	C9:Carbamidomethylation:1000.00;N26:Deamidation (NQ):1000.00
Sample 1	4	7	Uncharacterized protein OS=Gallus gallus GN=AHSG PE=4 SV=1	tr|E1BZE1|E1BZE1_CHICK	A.E(sub A)PAAPPPPLGCDDPEIEAAAEFAVIYIN(+.98)GHSHHGYR.F	Y	30.38	3840.78	36	7	961.21	4	33.51		F1:705	1	19	54	Deamidation (NQ); Mutation	N28:Deamidation (NQ):1000.00
Sample 1	5	3	Serum albumin OS=Gallus gallus GN=ALB PE=1 SV=2	P19121|ALBU_CHICK	K.C(+57.02)VANEDAPEC(+57.02)SKPLPSIILDEIC(+57.02)QVEK.L	Y	43.41	3113.47	27	1.5	1038.83	3	33.54		F1:706	3	80	106	Carbamidomethylation	C1:Carbamidomethylation:1000.00;C10:Carbamidomethylation:1000.00;C23:Carbamidomethylation:1000.00
Sample 1	3	8	SPARC OS=Gallus gallus GN=SPARC PE=4 SV=1	tr|F1P291|F1P291_CHICK	R.FFEACDLDND(+57.02)KYIALEEWASC(+57.02)FGIK.E	Y	19.84	3040.36	25	1.9	1014.46	3	35.7		F1:747	1	264	288	Carbamidomethylation (DHKE X@N-term); Carbamidomethylation	D10:Carbamidomethylation (DHKE X@N-term):0.00;C21:Carbamidomethylation:1000.00
Sample 1	4	7	Uncharacterized protein OS=Gallus gallus GN=AHSG PE=4 SV=1	tr|E1BZE1|E1BZE1_CHICK	K.NPDVYLMLLEIGR.A	Y	39.99	1531.81	13	0.5	766.911	2	35.73		F1:748	2	172	184
Sample 1	11	1201	Transthyretin OS=Gallus gallus GN=TTR PE=1 SV=1	P27731|TTHY_CHICK	K.TTEFGEIHELTTEEQFVEGVYRVEFDTSSYWK.G	Y	39.16	3855.78	32	0.2	964.952	4	36		F1:753	2	72	103
Sample 1	3	8	SPARC OS=Gallus gallus GN=SPARC PE=4 SV=1	tr|F1P291|F1P291_CHICK	R.FFEAC(+57.02)DLDNDKYIALEEWASC(+57.02)FGIK.E	Y	20.66	3040.36	25	1.6	1014.46	3	36.17		F1:756	3	264	288	Carbamidomethylation	C5:Carbamidomethylation:1000.00;C21:Carbamidomethylation:1000.00
Sample 1	4	7	Uncharacterized protein OS=Gallus gallus GN=AHSG PE=4 SV=1	tr|E1BZE1|E1BZE1_CHICK	N.PDVYLMLLEIGR.A	Y	32.36	1417.76	12	0.9	709.89	2	36.2		F1:757	1	173	184
Sample 1	18	260	Alpha 1 (V) collagen OS=Gallus gallus PE=2 SV=1	tr|Q9IAU4|Q9IAU4_CHICK	K.TVLEINTPKVEQVPIVDIMFNDFGEASQK.F	Y	17.67	3260.66	29	3.9	1087.9	3	36.31		F1:759	1	1795	1823
Sample 1	2	4	Collagen alpha-1(I) chain OS=Gallus gallus GN=COL1A1 PE=1 SV=3	P02457|CO1A1_CHICK	R.GLTGPIGP(+15.99)PGPAGAP(+15.99)GDKGEAGPPGPAGP(+15.99)TGAR.G	Y	17	2878.42	33	-0.8	960.48	3	38.07		F1:779	1	753	785	Oxidation or Hydroxylation	P8:Oxidation or Hydroxylation:0.00;P15:Oxidation or Hydroxylation:0.00;P29:Oxidation or Hydroxylation:0.00
Sample 1	2	4	Collagen alpha-1(I) chain OS=Gallus gallus GN=COL1A1 PE=1 SV=3	P02457|CO1A1_CHICK	R.GLTGPIGPP(+15.99)GPAGAP(+15.99)GDKGEAGPPGPAGP(+15.99)TGAR.G	Y	25.92	2878.42	33	0.1	960.481	3	39.23		F1:789	1	753	785	Oxidation or Hydroxylation	P9:Oxidation or Hydroxylation:14.02;P15:Oxidation or Hydroxylation:0.00;P29:Oxidation or Hydroxylation:0.00
Sample 1	10	618	Uncharacterized protein OS=Gallus gallus GN=COL11A1 PE=4 SV=2	tr|F1P4K9|F1P4K9_CHICK	R.ILDEEVFEGEIQQLLIIADPR.A	Y	26.63	2439.29	21	1.9	814.105	3	41.83		F1:811	3	213	233
Sample 2	2	4	Collagen alpha-1(I) chain OS=Gallus gallus GN=COL1A1 PE=1 SV=3	P02457|CO1A1_CHICK	R.GAP(+15.99)GPP(+15.99)GAVGAAGKDGEAGAQGPP(+15.99)GPTGPAGER.G	Y	38.2	2855.34	33	1.8	952.79	3	13.51		F2:130	2	588	620	Oxidation or Hydroxylation	P3:Oxidation or Hydroxylation:32.28;P6:Oxidation or Hydroxylation:9.34;P24:Oxidation or Hydroxylation:118.06
Sample 2	2	4	Collagen alpha-1(I) chain OS=Gallus gallus GN=COL1A1 PE=1 SV=3	P02457|CO1A1_CHICK	R.GAP(+15.99)GPPGAVGAAGKDGEAGAQGPP(+15.99)GPTGPAGER.G	Y	22.96	2839.35	33	0.6	947.457	3	14.28		F2:155	1	588	620	Oxidation or Hydroxylation	P3:Oxidation or Hydroxylation:22.85;P24:Oxidation or Hydroxylation:12.28
Sample 2	1	1	Collagen alpha-2(I) chain OS=Gallus gallus GN=COL1A2 PE=4 SV=1	tr|F1P0H9|F1P0H9_CHICK	R.GP(+15.99)SGPPGPDGNKGEP(+15.99)GNVGPAGAP(+15.99)GPAGPGGIP(+15.99)GER.G	Y	31.14	3191.49	36	1.3	1064.84	3	15.02		F2:177	1	609	644	Oxidation or Hydroxylation	P2:Oxidation or Hydroxylation:0.00;P15:Oxidation or Hydroxylation:38.03;P24:Oxidation or Hydroxylation:38.03;P33:Oxidation or Hydroxylation:44.44
Sample 2	1	1	Collagen alpha-2(I) chain OS=Gallus gallus GN=COL1A2 PE=4 SV=1	tr|F1P0H9|F1P0H9_CHICK	R.GIP(+15.99)GER(+15.99)GEPGPVGPSGFAGP(+15.99)PGAAGQP(+15.99)GAKGER.G	Y	34.15	3074.48	33	0.9	769.628	4	15.64		F2:196	1	708	740	Oxidation or Hydroxylation	P3:Oxidation or Hydroxylation:0.00;R6:Oxidation or Hydroxylation:0.00;P20:Oxidation or Hydroxylation:8.14;P27:Oxidation or Hydroxylation:0.00
Sample 2	1	1	Collagen alpha-2(I) chain OS=Gallus gallus GN=COL1A2 PE=4 SV=1	tr|F1P0H9|F1P0H9_CHICK	R.VGP(+15.99)P(+15.99)GPAGITGPP(+15.99)GPP(+15.99)GPAGK.D	Y	28.43	1840.93	21	0.5	921.474	2	15.69		F2:198	3	794	814	Oxidation or Hydroxylation	P3:Oxidation or Hydroxylation:38.16;P4:Oxidation or Hydroxylation:20.41;P13:Oxidation or Hydroxylation:20.00;P16:Oxidation or Hydroxylation:8.22
Sample 2	8	66	Alpha 1 type II procollagen (Fragment) OS=Gallus gallus GN=COL2A1 PE=4 SV=1	tr|Q7T2Z7|Q7T2Z7_CHICK	R.GLTGPIGP(+15.99)P(+15.99)GPAGPNGQ(sub E)KGESGPPGPSGAAGAR.G	Y	24.05	2894.43	33	-2	965.814	3	16.43		F2:223	1	568	600	Oxidation or Hydroxylation; Mutation	P8:Oxidation or Hydroxylation:28.36;P9:Oxidation or Hydroxylation:30.83
Sample 2	8	67	Collagen alpha-1(II) chain (Fragment) OS=Gallus gallus GN=COL2A1 PE=4 SV=2	tr|H9L2B7|H9L2B7_CHICK	R.GLTGPIGP(+15.99)P(+15.99)GPAGPNGQ(sub E)KGESGPPGPSGAAGAR.G	Y	24.05	2894.43	33	-2	965.814	3	16.43		F2:223	1	607	639	Oxidation or Hydroxylation; Mutation	P8:Oxidation or Hydroxylation:28.36;P9:Oxidation or Hydroxylation:30.83
Sample 2	8	68	Alpha 1 type IIA collagen OS=Gallus gallus GN=COL2A1 PE=2 SV=1	tr|Q90W37|Q90W37_CHICK	R.GLTGPIGP(+15.99)P(+15.99)GPAGPNGQ(sub E)KGESGPPGPSGAAGAR.G	Y	24.05	2894.43	33	-2	965.814	3	16.43		F2:223	1	719	751	Oxidation or Hydroxylation; Mutation	P8:Oxidation or Hydroxylation:28.36;P9:Oxidation or Hydroxylation:30.83
Sample 2	2	4	Collagen alpha-1(I) chain OS=Gallus gallus GN=COL1A1 PE=1 SV=3	P02457|CO1A1_CHICK	K.GSP(+15.99)GADGPIGAP(+15.99)GTP(+15.99)GPQGIAGQR.G	Y	32.49	2162.04	24	1.1	1082.03	2	16.59	35500000	F2:228	4	924	947	Oxidation or Hydroxylation	P3:Oxidation or Hydroxylation:6.63;P12:Oxidation or Hydroxylation:46.62;P15:Oxidation or Hydroxylation:8.22
Sample 2	1	1	Collagen alpha-2(I) chain OS=Gallus gallus GN=COL1A2 PE=4 SV=1	tr|F1P0H9|F1P0H9_CHICK	R.GPPGPSGPPGKDGRN(+.98)GLP(+15.99)GPIGPAGVR.G	Y	22.35	2477.28	27	0.7	620.327	4	16.87		F2:238	2	1053	1079	Deamidation (NQ); Oxidation or Hydroxylation	N15:Deamidation (NQ):1000.00;P18:Oxidation or Hydroxylation:11.12
Sample 2	2	4	Collagen alpha-1(I) chain OS=Gallus gallus GN=COL1A1 PE=1 SV=3	P02457|CO1A1_CHICK	K.GATGAP(+15.99)GIAGAP(+15.99)GFPGAR(+15.99).G	Y	13.35	1571.77	18	1.4	786.893	2	17.45		F2:258	1	387	404	Oxidation or Hydroxylation	P6:Oxidation or Hydroxylation:53.45;P12:Oxidation or Hydroxylation:5.03;R18:Oxidation or Hydroxylation:0.00
Sample 2	1	1	Collagen alpha-2(I) chain OS=Gallus gallus GN=COL1A2 PE=4 SV=1	tr|F1P0H9|F1P0H9_CHICK	K.GETGPAGPP(+15.99)GFQGLP(+15.99)GPSGPAGEAGKP(+15.99)GER.G	Y	49.25	2776.31	30	1.6	926.444	3	18.29		F2:288	4	543	572	Oxidation or Hydroxylation	P9:Oxidation or Hydroxylation:61.69;P15:Oxidation or Hydroxylation:71.87;P27:Oxidation or Hydroxylation:117.16
Sample 2	1	1	Collagen alpha-2(I) chain OS=Gallus gallus GN=COL1A2 PE=4 SV=1	tr|F1P0H9|F1P0H9_CHICK	R.VGPIGPAGNRGEP(+15.99)GNIGFPGPK(+15.99).G	Y	26.75	2119.08	22	1	707.368	3	18.57		F2:297	1	476	497	Oxidation or Hydroxylation	P13:Oxidation or Hydroxylation:6.59;K22:Oxidation or Hydroxylation:0.00
Sample 2	2	4	Collagen alpha-1(I) chain OS=Gallus gallus GN=COL1A1 PE=1 SV=3	P02457|CO1A1_CHICK	R.GFSGLQGPP(+15.99)GPP(+15.99)GAP(+15.99)GEQGPSGASGPAGPR.G	Y	46.8	2688.25	30	0.9	1345.13	2	18.85	56600000	F2:307	8	1101	1130	Oxidation or Hydroxylation	P9:Oxidation or Hydroxylation:55.73;P12:Oxidation or Hydroxylation:100.98;P15:Oxidation or Hydroxylation:115.21
Sample 2	2	4	Collagen alpha-1(I) chain OS=Gallus gallus GN=COL1A1 PE=1 SV=3	P02457|CO1A1_CHICK	R.GLP(+15.99)GTAGLPGM(+15.99)K.G	Y	29.22	1129.58	12	1.1	565.798	2	19.1	7220000	F2:316	2	243	254	Oxidation or Hydroxylation; Oxidation (M)	P3:Oxidation or Hydroxylation:113.99;M11:Oxidation (M):1000.00
Sample 2	2	4	Collagen alpha-1(I) chain OS=Gallus gallus GN=COL1A1 PE=1 SV=3	P02457|CO1A1_CHICK	R.GQAGVM(+15.99)GFPGPK(+15.99).G	Y	37.59	1176.56	12	1	589.288	2	19.16	16400000	F2:318	1	564	575	Oxidation (M); Oxidation or Hydroxylation	M6:Oxidation (M):1000.00;K12:Oxidation or Hydroxylation:0.00
Sample 2	2	4	Collagen alpha-1(I) chain OS=Gallus gallus GN=COL1A1 PE=1 SV=3	P02457|CO1A1_CHICK	R.GQAGVMGF(+15.99)P(+15.99)GPK.G	Y	37.44	1176.56	12	1	589.288	2	19.32	16400000	F2:324	1	564	575	Oxidation or Hydroxylation	F8:Oxidation or Hydroxylation:32.97;P9:Oxidation or Hydroxylation:13.67
Sample 2	1	1	Collagen alpha-2(I) chain OS=Gallus gallus GN=COL1A2 PE=4 SV=1	tr|F1P0H9|F1P0H9_CHICK	K.GP(+15.99)KGETGPTGAIGPIGASGPP(+15.99)GPVGAAGPAGPR.G	Y	49.61	2836.45	33	2.4	946.492	3	19.35		F2:325	3	744	776	Oxidation or Hydroxylation	P2:Oxidation or Hydroxylation:0.00;P21:Oxidation or Hydroxylation:14.02
Sample 2	1	1	Collagen alpha-2(I) chain OS=Gallus gallus GN=COL1A2 PE=4 SV=1	tr|F1P0H9|F1P0H9_CHICK	R.GLPGESGAVGPAGPIGSR.G	Y	29.75	1577.82	18	0.4	789.916	2	19.42		F2:327	2	591	608
Sample 2	1	1	Collagen alpha-2(I) chain OS=Gallus gallus GN=COL1A2 PE=4 SV=1	tr|F1P0H9|F1P0H9_CHICK	R.VGPIGPAGN(+.98)RGEP(+15.99)GNIGF(+15.99)PGPK.G	Y	30.98	2120.06	22	1.2	707.696	3	19.64		F2:335	1	476	497	Deamidation (NQ); Oxidation or Hydroxylation	N9:Deamidation (NQ):9.45;P13:Oxidation or Hydroxylation:0.00;F18:Oxidation or Hydroxylation:0.00
Sample 2	1	1	Collagen alpha-2(I) chain OS=Gallus gallus GN=COL1A2 PE=4 SV=1	tr|F1P0H9|F1P0H9_CHICK	R.VGPIGPAGNRGEP(+15.99)GN(+.98)IGFP(+15.99)GPK.G	Y	32.09	2120.06	22	1.3	707.697	3	19.76		F2:339	1	476	497	Oxidation or Hydroxylation; Deamidation (NQ)	P13:Oxidation or Hydroxylation:4.08;N15:Deamidation (NQ):0.00;P19:Oxidation or Hydroxylation:9.40
Sample 2	2	4	Collagen alpha-1(I) chain OS=Gallus gallus GN=COL1A1 PE=1 SV=3	P02457|CO1A1_CHICK	R.GFSGLQGP(+15.99)PGPPGAP(+15.99)GEQGPSGASGPAGPR.G	Y	28.08	2672.26	30	1.9	891.761	3	19.81		F2:341	1	1101	1130	Oxidation or Hydroxylation	P8:Oxidation or Hydroxylation:0.00;P15:Oxidation or Hydroxylation:22.09
Sample 2	2	4	Collagen alpha-1(I) chain OS=Gallus gallus GN=COL1A1 PE=1 SV=3	P02457|CO1A1_CHICK	R.GFSGLQGPP(+15.99)GPPGAP(+15.99)GEQGPSGASGPAGPR.G	Y	39.33	2672.26	30	1.6	1337.14	2	19.87		F2:343	3	1101	1130	Oxidation or Hydroxylation	P9:Oxidation or Hydroxylation:28.95;P15:Oxidation or Hydroxylation:50.34
Sample 2	1	1	Collagen alpha-2(I) chain OS=Gallus gallus GN=COL1A2 PE=4 SV=1	tr|F1P0H9|F1P0H9_CHICK	R.GEIGLP(+15.99)GSSGPVGPP(+15.99)GNP(+15.99)GAN(+.98)GLP(+15.99)GAK.G	Y	28.72	2418.17	27	1.7	1210.09	2	20.15		F2:352	1	282	308	Oxidation or Hydroxylation; Deamidation (NQ)	P6:Oxidation or Hydroxylation:38.19;P15:Oxidation or Hydroxylation:0.00;P18:Oxidation or Hydroxylation:40.00;N21:Deamidation (NQ):42.68;P24:Oxidation or Hydroxylation:0.00
Sample 2	1	1	Collagen alpha-2(I) chain OS=Gallus gallus GN=COL1A2 PE=4 SV=1	tr|F1P0H9|F1P0H9_CHICK	R.GSDGSAGPTGPAGPIGAAGPP(+15.99)GFP(+15.99)GAP(+15.99)GAK.G	Y	46.35	2520.19	30	1.8	1261.1	2	20.75		F2:370	2	234	263	Oxidation or Hydroxylation	P21:Oxidation or Hydroxylation:28.22;P24:Oxidation or Hydroxylation:137.50;P27:Oxidation or Hydroxylation:129.30
Sample 2	4	7	Uncharacterized protein OS=Gallus gallus GN=AHSG PE=4 SV=1	tr|E1BZE1|E1BZE1_CHICK	K.VNGQ(+.98)FSVLASK.C	Y	23.45	1149.6	11	0.9	575.809	2	21.01		F2:379	1	118	128	Deamidation (NQ)	Q4:Deamidation (NQ):0.00
Sample 2	1	1	Collagen alpha-2(I) chain OS=Gallus gallus GN=COL1A2 PE=4 SV=1	tr|F1P0H9|F1P0H9_CHICK	K.GPKGETGPTGAIGPIGASGPP(+15.99)GPVGAAGPAGPRGDAGPP(+15.99)GMTGFPGAAGR(+15.99).V	Y	44.53	4349.12	50	0.6	1088.29	4	21.87		F2:407	1	744	793	Oxidation or Hydroxylation	P21:Oxidation or Hydroxylation:53.68;P39:Oxidation or Hydroxylation:71.95;R50:Oxidation or Hydroxylation:123.66
Sample 2	1	1	Collagen alpha-2(I) chain OS=Gallus gallus GN=COL1A2 PE=4 SV=1	tr|F1P0H9|F1P0H9_CHICK	R.GDP(+15.99)GPVGPVGPAGAFGPR.G	Y	45.48	1619.81	18	1.4	810.911	2	21.91		F2:408	4	978	995	Oxidation or Hydroxylation	P3:Oxidation or Hydroxylation:11.06
Sample 2	1	1	Collagen alpha-2(I) chain OS=Gallus gallus GN=COL1A2 PE=4 SV=1	tr|F1P0H9|F1P0H9_CHICK	R.GFP(+15.99)GTP(+15.99)GLPGF(+15.99)K.G	Y	32.33	1221.6	12	1.3	611.809	2	22.15		F2:416	1	165	176	Oxidation or Hydroxylation	P3:Oxidation or Hydroxylation:9.34;P6:Oxidation or Hydroxylation:37.54;F11:Oxidation or Hydroxylation:0.00
Sample 2	1	1	Collagen alpha-2(I) chain OS=Gallus gallus GN=COL1A2 PE=4 SV=1	tr|F1P0H9|F1P0H9_CHICK	R.GFP(+15.99)GTP(+15.99)GLPGFK(+15.99).G	Y	33.59	1221.6	12	0.7	611.809	2	22.28		F2:420	1	165	176	Oxidation or Hydroxylation	P3:Oxidation or Hydroxylation:14.02;P6:Oxidation or Hydroxylation:30.64;K12:Oxidation or Hydroxylation:9.42
Sample 2	6	6	Apolipoprotein A-I OS=Gallus gallus GN=APOA1 PE=1 SV=2	P08250|APOA1_CHICK	R.IRDM(+15.99)VDVYLETVK.A	Y	33.61	1595.82	13	0.2	532.948	3	22.33		F2:422	2	34	46	Oxidation (M)	M4:Oxidation (M):1000.00
Sample 2	1	1	Collagen alpha-2(I) chain OS=Gallus gallus GN=COL1A2 PE=4 SV=1	tr|F1P0H9|F1P0H9_CHICK	D.PGPVGPVGPAGAFGPR.G	Y	34.27	1431.76	16	1.3	716.889	2	22.36		F2:423	2	980	995
Sample 2	1	1	Collagen alpha-2(I) chain OS=Gallus gallus GN=COL1A2 PE=4 SV=1	tr|F1P0H9|F1P0H9_CHICK	R.GDN(sub P)GPVGPVGPAGAFGPR.G	Y	32.5	1620.8	18	5.6	811.412	2	22.39		F2:424	2	978	995	Mutation
Sample 2	1	1	Collagen alpha-2(I) chain OS=Gallus gallus GN=COL1A2 PE=4 SV=1	tr|F1P0H9|F1P0H9_CHICK	R.GDPGPVGPVGP(+15.99)AGAFGPR.G	Y	28.53	1619.81	18	0.3	810.91	2	22.62		F2:432	2	978	995	Oxidation or Hydroxylation	P11:Oxidation or Hydroxylation:0.00
Sample 2	1	1	Collagen alpha-2(I) chain OS=Gallus gallus GN=COL1A2 PE=4 SV=1	tr|F1P0H9|F1P0H9_CHICK	R.GLP(+15.99)GIAGATGEPGP(+15.99)LGVSGPP(+15.99)GAR.G	Y	29.69	2132.09	24	0.5	711.703	3	22.87		F2:440	1	882	905	Oxidation or Hydroxylation	P3:Oxidation or Hydroxylation:74.73;P14:Oxidation or Hydroxylation:0.00;P21:Oxidation or Hydroxylation:0.00
Sample 2	1	1	Collagen alpha-2(I) chain OS=Gallus gallus GN=COL1A2 PE=4 SV=1	tr|F1P0H9|F1P0H9_CHICK	R.GLP(+15.99)GIAGATGEPGP(+15.99)LGVSGP(+15.99)PGAR.G	Y	29.94	2132.09	24	0.6	711.703	3	23.43		F2:457	1	882	905	Oxidation or Hydroxylation	P3:Oxidation or Hydroxylation:85.33;P14:Oxidation or Hydroxylation:8.22;P20:Oxidation or Hydroxylation:7.21
Sample 2	1	1	Collagen alpha-2(I) chain OS=Gallus gallus GN=COL1A2 PE=4 SV=1	tr|F1P0H9|F1P0H9_CHICK	K.GETGPTGAIGPIGASGP(+15.99)PGPVGAAGPAGPRGDAGP(+15.99)PGMTGFPGAAGR(+15.99).V	Y	29.11	4066.96	47	1.4	1017.75	4	23.46		F2:458	1	747	793	Oxidation or Hydroxylation	P17:Oxidation or Hydroxylation:0.00;P35:Oxidation or Hydroxylation:0.00;R47:Oxidation or Hydroxylation:0.00
Sample 2	1	1	Collagen alpha-2(I) chain OS=Gallus gallus GN=COL1A2 PE=4 SV=1	tr|F1P0H9|F1P0H9_CHICK	K.GETGPTGAIGPIGASGPP(+15.99)GPVGAAGPAGPRGDAGPP(+15.99)GMTGFPGAAGR(+15.99).V	Y	44.51	4066.96	47	2.8	1356.66	3	23.54		F2:460	1	747	793	Oxidation or Hydroxylation	P18:Oxidation or Hydroxylation:58.12;P36:Oxidation or Hydroxylation:59.55;R47:Oxidation or Hydroxylation:33.04
Sample 2	1	1	Collagen alpha-2(I) chain OS=Gallus gallus GN=COL1A2 PE=4 SV=1	tr|F1P0H9|F1P0H9_CHICK	R.GLP(+15.99)GIAGATGEPGPLGVSGPPGAR(+15.99).G	Y	37.37	2116.09	24	1.8	1059.05	2	23.89		F2:465	3	882	905	Oxidation or Hydroxylation	P3:Oxidation or Hydroxylation:124.12;R24:Oxidation or Hydroxylation:0.00
Sample 2	6	6	Apolipoprotein A-I OS=Gallus gallus GN=APOA1 PE=1 SV=2	P08250|APOA1_CHICK	K.IRPFLDQFSAK.W	Y	35.5	1320.72	11	0.2	441.247	3	23.97		F2:468	1	120	130
Sample 2	6	6	Apolipoprotein A-I OS=Gallus gallus GN=APOA1 PE=1 SV=2	P08250|APOA1_CHICK	K.MTPLVQEFR.E	Y	33.53	1119.57	9	1.8	560.796	2	24.08		F2:471	1	230	238
Sample 2	6	6	Apolipoprotein A-I OS=Gallus gallus GN=APOA1 PE=1 SV=2	P08250|APOA1_CHICK	K.DAIAQFESSAVGK.Q	Y	36.18	1321.65	13	1.3	661.834	2	24.24		F2:475	2	51	63
Sample 2	1	1	Collagen alpha-2(I) chain OS=Gallus gallus GN=COL1A2 PE=4 SV=1	tr|F1P0H9|F1P0H9_CHICK	L.GGNFAAQYDPSK(+163.05)AADFGPGPMGLMGPR.G	Y	25.57	2871.29	27	0.2	718.831	4	24.31		F2:477	1	72	98	Phenethyl isothiocyanate	K12:Phenethyl isothiocyanate:4.16
Sample 2	5	3	Serum albumin OS=Gallus gallus GN=ALB PE=1 SV=2	P19121|ALBU_CHICK	K.QQYFC(+57.02)GILK.Q	Y	28.28	1155.57	9	0.7	578.795	2	24.65		F2:486	1	224	232	Carbamidomethylation	C5:Carbamidomethylation:1000.00
Sample 2	5	3	Serum albumin OS=Gallus gallus GN=ALB PE=1 SV=2	P19121|ALBU_CHICK	R.SQC(+57.02)IM(+15.99)EAEFDEKPADLPSLVEK.Y	Y	35.15	2551.18	22	-0.1	851.401	3	24.82		F2:490	2	315	336	Carbamidomethylation; Oxidation (M)	C3:Carbamidomethylation:1000.00;M5:Oxidation (M):1000.00
Sample 2	3	8	SPARC OS=Gallus gallus GN=SPARC PE=4 SV=1	tr|F1P291|F1P291_CHICK	K.EQDIDKDLVI	Y	22.79	1186.61	10	0.7	594.312	2	24.89		F2:492	3	289	298
Sample 2	10	618	Uncharacterized protein OS=Gallus gallus GN=COL11A1 PE=4 SV=2	tr|F1P4K9|F1P4K9_CHICK	R.F(+15.99)GGDGEKGPTISAQEAQAQAILQQAR.I	Y	17.06	2686.33	26	1.5	896.452	3	25.13		F2:499	1	500	525	Oxidation or Hydroxylation	F1:Oxidation or Hydroxylation:0.00
Sample 2	1	1	Collagen alpha-2(I) chain OS=Gallus gallus GN=COL1A2 PE=4 SV=1	tr|F1P0H9|F1P0H9_CHICK	K.GPSGEAGAAGPP(+15.99)GTP(+15.99)GPQGILGAP(+15.99)GILGLPGSRGER(+15.99).G	Y	34.35	3268.64	36	2.5	1090.56	3	25.34		F2:505	1	846	881	Oxidation or Hydroxylation	P12:Oxidation or Hydroxylation:58.64;P15:Oxidation or Hydroxylation:63.16;P24:Oxidation or Hydroxylation:50.34;R36:Oxidation or Hydroxylation:43.55
Sample 2	6	6	Apolipoprotein A-I OS=Gallus gallus GN=APOA1 PE=1 SV=2	P08250|APOA1_CHICK	R.LTPVAQELKELTK.Q	Y	38.7	1468.85	13	0.9	735.433	2	25.62		F2:512	1	142	154
Sample 2	4	7	Uncharacterized protein OS=Gallus gallus GN=AHSG PE=4 SV=1	tr|E1BZE1|E1BZE1_CHICK	K.ISHNNPVASES(+79.97)SSSEFPSLLSAK.S	Y	23.9	2467.13	23	1.8	823.384	3	25.76		F2:516	1	284	306	Phosphorylation (STY)	S11:Phosphorylation (STY):0.00
Sample 2	5	3	Serum albumin OS=Gallus gallus GN=ALB PE=1 SV=2	P19121|ALBU_CHICK	K.QSD(+57.02)INTCFGEEGANLIVQSR.A	Y	24.17	2237.04	20	1.4	1119.53	2	25.92		F2:519	1	589	608	Carbamidomethylation (DHKE X@N-term)	D3:Carbamidomethylation (DHKE X@N-term):0.00
Sample 2	5	3	Serum albumin OS=Gallus gallus GN=ALB PE=1 SV=2	P19121|ALBU_CHICK	K.QSDINTC(+57.02)FGEEGANLIVQSR.A	Y	25.02	2237.04	20	0.6	746.687	3	25.95		F2:520	2	589	608	Carbamidomethylation	C7:Carbamidomethylation:1000.00
Sample 2	2	4	Collagen alpha-1(I) chain OS=Gallus gallus GN=COL1A1 PE=1 SV=3	P02457|CO1A1_CHICK	K.SGEYWIDPNQGC(+57.02)NLDAIK.V	Y	17.13	2078.94	18	1	1040.48	2	26.37		F2:529	1	1260	1277	Carbamidomethylation	C12:Carbamidomethylation:1000.00
Sample 2	5	3	Serum albumin OS=Gallus gallus GN=ALB PE=1 SV=2	P19121|ALBU_CHICK	R.SQC(+57.02)IMEAEFDEKPADLPSLVEK.Y	Y	36.22	2535.19	22	1.3	846.071	3	26.86		F2:539	1	315	336	Carbamidomethylation	C3:Carbamidomethylation:1000.00
Sample 2	1	1	Collagen alpha-2(I) chain OS=Gallus gallus GN=COL1A2 PE=4 SV=1	tr|F1P0H9|F1P0H9_CHICK	K.AADFGPGPMGLM(+15.99)GPR.G	Y	37.87	1488.69	15	1	745.351	2	27.26		F2:551	1	84	98	Oxidation (M)	M12:Oxidation (M):13.93
Sample 2	3	8	SPARC OS=Gallus gallus GN=SPARC PE=4 SV=1	tr|F1P291|F1P291_CHICK	K.NVLITLYERDEDN(+.98)NLLTEK.Q	Y	42.57	2292.15	19	-1	765.056	3	28.52		F2:577	2	168	186	Deamidation (NQ)	N13:Deamidation (NQ):0.00
Sample 2	14	10	Decorin OS=Gallus gallus GN=DCN PE=1 SV=1	P28675|PGS2_CHICK	K.IASIGINDFC(+57.02)PLGYNTK.K	Y	34.21	1881.93	17	1	941.973	2	28.96		F2:586	1	302	318	Carbamidomethylation	C10:Carbamidomethylation:1000.00
Sample 2	14	11	Decorin OS=Gallus gallus GN=DCN PE=4 SV=2	tr|E1BRE9|E1BRE9_CHICK	K.IASIGINDFC(+57.02)PLGYNTK.K	Y	34.21	1881.93	17	1	941.973	2	28.96		F2:586	1	302	318	Carbamidomethylation	C10:Carbamidomethylation:1000.00
Sample 2	1	1	Collagen alpha-2(I) chain OS=Gallus gallus GN=COL1A2 PE=4 SV=1	tr|F1P0H9|F1P0H9_CHICK	A.Q(-17.03)YDP(+15.99)SKAADFGPGPMGLMGPR.G	Y	33.95	2189.99	21	1.8	731.004	3	29.02		F2:587	1	78	98	Pyro-glu from Q; Oxidation or Hydroxylation	Q1:Pyro-glu from Q:1000.00;P4:Oxidation or Hydroxylation:0.00
Sample 2	11	1201	Transthyretin OS=Gallus gallus GN=TTR PE=1 SV=1	P27731|TTHY_CHICK	K.TTEFGEIHELTTEEQFVEGVYR.V	Y	22.62	2613.22	22	1.1	872.083	3	29.71		F2:603	1	72	93
Sample 2	9	20	Vitronectin OS=Gallus gallus PE=2 SV=1	tr|O12945|O12945_CHICK	R.SIAQYWLDC(+57.02)PQPDEEST	Y	22.44	2037.86	17	0.8	1019.94	2	29.81		F2:605	1	437	453	Carbamidomethylation	C9:Carbamidomethylation:1000.00
Sample 2	9	21	Uncharacterized protein OS=Gallus gallus GN=VTN PE=4 SV=2	tr|E1C7A7|E1C7A7_CHICK	R.SIAQYWLDC(+57.02)PQPDEEST	Y	22.44	2037.86	17	0.8	1019.94	2	29.81		F2:605	1	437	453	Carbamidomethylation	C9:Carbamidomethylation:1000.00
Sample 2	5	3	Serum albumin OS=Gallus gallus GN=ALB PE=1 SV=2	P19121|ALBU_CHICK	R.VSFLGHFIYSVAR.R	Y	39.84	1494.8	13	0.6	499.274	3	30.13		F2:611	4	160	172
Sample 2	6	6	Apolipoprotein A-I OS=Gallus gallus GN=APOA1 PE=1 SV=2	P08250|APOA1_CHICK	R.EM(+15.99)WLKDTEALRAELTKDLEEVKEK.I	Y	41.33	2919.49	24	0.6	584.906	5	30.81		F2:620	2	96	119	Oxidation (M)	M2:Oxidation (M):1000.00
Sample 2	5	3	Serum albumin OS=Gallus gallus GN=ALB PE=1 SV=2	P19121|ALBU_CHICK	K.SFEAGHDAFMAEFVYEYSR.R	Y	22.88	2254.96	19	1	752.662	3	30.84		F2:621	1	346	364
Sample 2	5	3	Serum albumin OS=Gallus gallus GN=ALB PE=1 SV=2	P19121|ALBU_CHICK	K.AVAMITFAQYLQR.C	Y	36.73	1510.8	13	1.3	756.407	2	31.75		F2:637	1	48	60
Sample 2	3	8	SPARC OS=Gallus gallus GN=SPARC PE=4 SV=1	tr|F1P291|F1P291_CHICK	K.NYNMYIFPVHWQFGQLDQHPIDGYLSHTELAPLRAPLIPMEHC(+57.02)TTR.F	Y	41.75	5505.66	46	1	918.619	6	32.09		F2:647	6	218	263	Carbamidomethylation	C43:Carbamidomethylation:1000.00
Sample 2	7	19	Uncharacterized protein OS=Gallus gallus GN=SERPINF1 PE=3 SV=1	tr|E1C7H6|E1C7H6_CHICK	R.ALFYDLLNKAEVHNTYKDLLASVTGPEK.S	Y	18.97	3148.64	28	0.7	788.169	4	32.17		F2:649	1	105	132
Sample 2	3	8	SPARC OS=Gallus gallus GN=SPARC PE=4 SV=1	tr|F1P291|F1P291_CHICK	K.NYNMYIFPVHWQFGQLDQHPIDGYLSHTELAPLR.A	Y	52.4	4098.98	34	1.1	1025.75	4	32.41		F2:655	5	218	251
Sample 2	4	7	Uncharacterized protein OS=Gallus gallus GN=AHSG PE=4 SV=1	tr|E1BZE1|E1BZE1_CHICK	A.APAAPPPPLGC(+57.02)DDPEIEAAAEFAVIYIN(+.98)GHSHHGYR.F	Y	43.85	3839.8	36	0.9	768.968	5	33.82		F2:684	11	19	54	Carbamidomethylation; Deamidation (NQ)	C11:Carbamidomethylation:1000.00;N28:Deamidation (NQ):1000.00
Sample 2	10	618	Uncharacterized protein OS=Gallus gallus GN=COL11A1 PE=4 SV=2	tr|F1P4K9|F1P4K9_CHICK	R.SPVFLFEDQN(+.98)GNPAPEDYPLFR.T	Y	21.49	2552.19	22	1	851.737	3	33.93		F2:687	1	137	158	Deamidation (NQ)	N10:Deamidation (NQ):0.00
Sample 2	9	20	Vitronectin OS=Gallus gallus PE=2 SV=1	tr|O12945|O12945_CHICK	K.LISDVWGIEGPIDAAFTR.I	Y	35.99	1959.01	18	-0.6	980.512	2	34.88		F2:706	4	193	210
Sample 2	9	21	Uncharacterized protein OS=Gallus gallus GN=VTN PE=4 SV=2	tr|E1C7A7|E1C7A7_CHICK	K.LISDVWGIEGPIDAAFTR.I	Y	35.99	1959.01	18	-0.6	980.512	2	34.88		F2:706	4	193	210
Sample 2	7	19	Uncharacterized protein OS=Gallus gallus GN=SERPINF1 PE=3 SV=1	tr|E1C7H6|E1C7H6_CHICK	K.IAQLPLTEGVSAMFFLPTK.V	Y	33.82	2062.12	19	1.5	1032.07	2	36.93		F2:735	5	266	284
Sample 2	3	8	SPARC OS=Gallus gallus GN=SPARC PE=4 SV=1	tr|F1P291|F1P291_CHICK	R.FFEAC(+57.02)DLDN(+.98)DKYIALEEWASC(+57.02)FGIK.E	Y	18.14	3041.35	25	2.4	1014.79	3	36.96		F2:736	2	264	288	Carbamidomethylation; Deamidation (NQ)	C5:Carbamidomethylation:1000.00;N9:Deamidation (NQ):1000.00;C21:Carbamidomethylation:1000.00
Sample 2	1	1	Collagen alpha-2(I) chain OS=Gallus gallus GN=COL1A2 PE=4 SV=1	tr|F1P0H9|F1P0H9_CHICK	R.LPILDIAPLDIGGADQEFGLHIGPVC(+57.02)FK	Y	44.21	3004.57	28	0.8	1002.53	3	37.11		F2:739	1	1336	1363	Carbamidomethylation	C26:Carbamidomethylation:1000.00
Sample 2	12	616	Uncharacterized protein OS=Gallus gallus GN=THBS1 PE=4 SV=2	tr|F1P0J8|F1P0J8_CHICK	R.GDDDSVFDIFELTVR.K	Y	27.65	1726.8	15	1.5	864.411	2	37.42		F2:745	2	27	41
Sample 2	7	19	Uncharacterized protein OS=Gallus gallus GN=SERPINF1 PE=3 SV=1	tr|E1C7H6|E1C7H6_CHICK	R.TATANVLLSPFSLATALSGLSLGAGERTEDVISR.A	Y	35.48	3416.81	34	1.6	855.212	4	39.43		F2:763	1	71	104
Sample 2	18	260	Alpha 1 (V) collagen OS=Gallus gallus PE=2 SV=1	tr|Q9IAU4|Q9IAU4_CHICK	R.ILDEEVFEGDIQQLLIVADPR.A	Y	18.69	2411.26	21	1.3	804.761	3	39.52		F2:765	1	208	228
Sample 2	5	3	Serum albumin OS=Gallus gallus GN=ALB PE=1 SV=2	P19121|ALBU_CHICK	F.LYAPAILSFAVDFEHALQSC(+57.02)C(+57.02)K.E	Y	18.5	2539.22	22	3.1	847.418	3	40.24		F2:771	1	177	198	Carbamidomethylation	C20:Carbamidomethylation:1000.00;C21:Carbamidomethylation:1000.00
Sample 2	7	19	Uncharacterized protein OS=Gallus gallus GN=SERPINF1 PE=3 SV=1	tr|E1C7H6|E1C7H6_CHICK	R.TATANVLLSPFSLATALSGLSLGAGER.T	Y	30.68	2616.41	27	1.4	873.146	3	41.35		F2:780	2	71	97
Sample 2	2	4	Collagen alpha-1(I) chain OS=Gallus gallus GN=COL1A1 PE=1 SV=3	P02457|CO1A1_CHICK	K.GATGAP(+15.99)GIAGAP(+15.99)GFP(+15.99)GAR.G	Y	32.07	1571.77	18	0.7	786.892	2	43.18		F2:796	3	387	404	Oxidation or Hydroxylation	P6:Oxidation or Hydroxylation:78.75;P12:Oxidation or Hydroxylation:18.53;P15:Oxidation or Hydroxylation:0.00
Sample 2	2	4	Collagen alpha-1(I) chain OS=Gallus gallus GN=COL1A1 PE=1 SV=3	P02457|CO1A1_CHICK	R.GLTGPIGPP(+15.99)GPAGAPGD(+15.99)KGEAGPP(+15.99)GPAGPTGAR.G	Y	32.6	2878.42	33	2.1	960.483	3	46.48		F2:829	1	753	785	Oxidation or Hydroxylation	P9:Oxidation or Hydroxylation:22.85;D17:Oxidation or Hydroxylation:28.13;P24:Oxidation or Hydroxylation:11.10
