# Supplementary material for: Bone protein “extractomics”: comparing the efficiency of bone protein extractions of Gallus gallus in tandem mass spectrometry, with an eye towards paleoproteomics
Source: PeerJ. 2016 Oct 27;4:e2603. doi: 10.7717/peerj.2603 (PMC5088622; doi:10.7717/peerj.2603)
Supplement: Table S20 [file peerj-04-2603-s024.xlsx]

## Sheet: Peptides
Table S20. Peptides identified in samples from Method 4, speed vacuum ABC (20 mL/g), post-HCl (20-H/ABC-SV) @ 1% FDR
Sample #	Protein Group	Protein ID	Protein Description	Protein Accession	Peptide	Unique	-10lgP	Mass	Length	ppm	m/z	z	RT	Area	Scan	#Spec	Start	End	PTM	AScore
Sample 1	2	4	Collagen alpha-1(I) chain OS=Gallus gallus GN=COL1A1 PE=1 SV=3	P02457|CO1A1_CHICK	R.GAP(+15.99)GPP(+15.99)GAVGAAGKDGEAGAQGPP(+15.99)GPTGPAGER.G	Y	27.05	2855.34	33	1.1	952.789	3	13.59		F3:158	1	588	620	Oxidation or Hydroxylation	P3:Oxidation or Hydroxylation:22.85;P6:Oxidation or Hydroxylation:17.01;P24:Oxidation or Hydroxylation:11.06
Sample 1	2	4	Collagen alpha-1(I) chain OS=Gallus gallus GN=COL1A1 PE=1 SV=3	P02457|CO1A1_CHICK	R.GAP(+15.99)GPP(+15.99)GAVGAAGKDGEAGAQGPPGPTGPAGER.G	Y	34.96	2839.35	33	2.1	947.459	3	13.85		F3:166	2	588	620	Oxidation or Hydroxylation	P3:Oxidation or Hydroxylation:14.04;P6:Oxidation or Hydroxylation:17.01
Sample 1	1	1	Collagen alpha-2(I) chain OS=Gallus gallus GN=COL1A2 PE=4 SV=1	tr|F1P0H9|F1P0H9_CHICK	R.GASGPVGAKGPN(+.98)GDAGRP(+15.99)GEPGLMGPR(+15.99).G	Y	33.15	2491.19	27	0.9	831.404	3	14.27		F3:180	1	423	449	Deamidation (NQ); Oxidation or Hydroxylation	N12:Deamidation (NQ):1000.00;P18:Oxidation or Hydroxylation:8.28;R27:Oxidation or Hydroxylation:0.00
Sample 1	1	1	Collagen alpha-2(I) chain OS=Gallus gallus GN=COL1A2 PE=4 SV=1	tr|F1P0H9|F1P0H9_CHICK	R.VGP(+15.99)P(+15.99)GPAGITGPP(+15.99)GPP(+15.99)GPAGKDGPR.G	Y	19.89	2266.13	25	1.2	756.386	3	14.77		F3:196	1	794	818	Oxidation or Hydroxylation	P3:Oxidation or Hydroxylation:38.16;P4:Oxidation or Hydroxylation:26.31;P13:Oxidation or Hydroxylation:17.01;P16:Oxidation or Hydroxylation:6.59
Sample 1	1	1	Collagen alpha-2(I) chain OS=Gallus gallus GN=COL1A2 PE=4 SV=1	tr|F1P0H9|F1P0H9_CHICK	R.GLHGEFGVP(+15.99)GPAGPRGER.G	Y	28.34	1804.9	18	0.4	602.64	3	14.83		F3:198	1	573	590	Oxidation or Hydroxylation	P9:Oxidation or Hydroxylation:0.00
Sample 1	1	1	Collagen alpha-2(I) chain OS=Gallus gallus GN=COL1A2 PE=4 SV=1	tr|F1P0H9|F1P0H9_CHICK	V.P(+15.99)GPAGPRGER.G	Y	19.31	1008.51	10	0.5	505.262	2	14.93		F3:202	1	581	590	Oxidation or Hydroxylation	P1:Oxidation or Hydroxylation:11.10
Sample 1	1	1	Collagen alpha-2(I) chain OS=Gallus gallus GN=COL1A2 PE=4 SV=1	tr|F1P0H9|F1P0H9_CHICK	R.GPP(+15.99)GP(+15.99)SGPPGKDGRN(+.98)GLP(+15.99)GPIGPAGVR.G	Y	19.78	2509.27	27	0.7	628.324	4	15.35		F3:215	1	1053	1079	Oxidation or Hydroxylation; Deamidation (NQ)	P3:Oxidation or Hydroxylation:17.01;P5:Oxidation or Hydroxylation:0.00;N15:Deamidation (NQ):1000.00;P18:Oxidation or Hydroxylation:14.04
Sample 1	1	1	Collagen alpha-2(I) chain OS=Gallus gallus GN=COL1A2 PE=4 SV=1	tr|F1P0H9|F1P0H9_CHICK	R.VGP(+15.99)P(+15.99)GPAGITGPP(+15.99)GPPGP(+15.99)AGK.D	Y	20.48	1840.93	21	1	921.474	2	15.52		F3:221	1	794	814	Oxidation or Hydroxylation	P3:Oxidation or Hydroxylation:29.32;P4:Oxidation or Hydroxylation:14.63;P13:Oxidation or Hydroxylation:21.94;P18:Oxidation or Hydroxylation:0.00
Sample 1	1	1	Collagen alpha-2(I) chain OS=Gallus gallus GN=COL1A2 PE=4 SV=1	tr|F1P0H9|F1P0H9_CHICK	R.VGP(+15.99)P(+15.99)GPAGITGPP(+15.99)GP(+15.99)PGPAGK.D	Y	18.82	1840.93	21	1.5	921.475	2	15.58		F3:223	1	794	814	Oxidation or Hydroxylation	P3:Oxidation or Hydroxylation:14.71;P4:Oxidation or Hydroxylation:8.64;P13:Oxidation or Hydroxylation:20.00;P15:Oxidation or Hydroxylation:0.00
Sample 1	1	1	Collagen alpha-2(I) chain OS=Gallus gallus GN=COL1A2 PE=4 SV=1	tr|F1P0H9|F1P0H9_CHICK	R.GLP(+15.99)GAIGAP(+15.99)GPAGGAGDRGEGGPAGPAGPAGAR.G	Y	37.9	2724.33	33	1.1	909.119	3	15.68		F3:227	6	675	707	Oxidation or Hydroxylation	P3:Oxidation or Hydroxylation:171.60;P9:Oxidation or Hydroxylation:45.01
Sample 1	2	4	Collagen alpha-1(I) chain OS=Gallus gallus GN=COL1A1 PE=1 SV=3	P02457|CO1A1_CHICK	R.GFP(+15.99)GADGIAGPKGP(+15.99)PGER.G	Y	16.26	1710.83	18	1.2	856.425	2	15.93		F3:236	2	483	500	Oxidation or Hydroxylation	P3:Oxidation or Hydroxylation:17.01;P14:Oxidation or Hydroxylation:0.00
Sample 1	1	1	Collagen alpha-2(I) chain OS=Gallus gallus GN=COL1A2 PE=4 SV=1	tr|F1P0H9|F1P0H9_CHICK	R.GPP(+15.99)GPSGPPGKDGRN(+.98)GLP(+15.99)GPIGPAGVR.G	Y	34	2493.27	27	1	832.099	3	16.08		F3:241	5	1053	1079	Oxidation or Hydroxylation; Deamidation (NQ)	P3:Oxidation or Hydroxylation:9.34;N15:Deamidation (NQ):1000.00;P18:Oxidation or Hydroxylation:6.59
Sample 1	1	1	Collagen alpha-2(I) chain OS=Gallus gallus GN=COL1A2 PE=4 SV=1	tr|F1P0H9|F1P0H9_CHICK	R.GLP(+15.99)GAIGAPGPAGGAGD(+15.99)RGEGGPAGPAGPAGAR.G	Y	17.77	2724.33	33	0.7	682.091	4	16.14		F3:243	1	675	707	Oxidation or Hydroxylation	P3:Oxidation or Hydroxylation:14.42;D17:Oxidation or Hydroxylation:0.00
Sample 1	2	4	Collagen alpha-1(I) chain OS=Gallus gallus GN=COL1A1 PE=1 SV=3	P02457|CO1A1_CHICK	K.GSPGAD(+15.99)GPIGAP(+15.99)GTP(+15.99)GPQGIAGQR.G	Y	27.96	2162.04	24	1.5	1082.03	2	16.38	66200000	F3:250	1	924	947	Oxidation or Hydroxylation	D6:Oxidation or Hydroxylation:0.00;P12:Oxidation or Hydroxylation:55.36;P15:Oxidation or Hydroxylation:33.18
Sample 1	1	1	Collagen alpha-2(I) chain OS=Gallus gallus GN=COL1A2 PE=4 SV=1	tr|F1P0H9|F1P0H9_CHICK	K.GEIGPAGNVGPTGPAGPR.G	Y	41.92	1602.81	18	0.9	802.414	2	16.4		F3:251	1	264	281
Sample 1	1	1	Collagen alpha-2(I) chain OS=Gallus gallus GN=COL1A2 PE=4 SV=1	tr|F1P0H9|F1P0H9_CHICK	R.GPPGPSGPPGKDGRN(+.98)GLP(+15.99)GPIGPAGVR.G	Y	29.31	2477.28	27	0.9	620.327	4	16.43		F3:252	2	1053	1079	Deamidation (NQ); Oxidation or Hydroxylation	N15:Deamidation (NQ):1000.00;P18:Oxidation or Hydroxylation:11.12
Sample 1	1	1	Collagen alpha-2(I) chain OS=Gallus gallus GN=COL1A2 PE=4 SV=1	tr|F1P0H9|F1P0H9_CHICK	K.EGPVGFP(+15.99)GADGR.V	Y	37.28	1173.54	12	0.9	587.779	2	16.54	28900000	F3:256	2	464	475	Oxidation or Hydroxylation	P7:Oxidation or Hydroxylation:8.69
Sample 1	1	1	Collagen alpha-2(I) chain OS=Gallus gallus GN=COL1A2 PE=4 SV=1	tr|F1P0H9|F1P0H9_CHICK	R.GLHGEFGVP(+15.99)GPAGPR.G	Y	43.95	1462.73	15	0.9	732.374	2	16.57		F3:257	3	573	587	Oxidation or Hydroxylation	P9:Oxidation or Hydroxylation:39.76
Sample 1	2	4	Collagen alpha-1(I) chain OS=Gallus gallus GN=COL1A1 PE=1 SV=3	P02457|CO1A1_CHICK	R.GLTGPIGPP(+15.99)GPAGAP(+15.99)GDKGEAGPP(+15.99)GPAGPTGAR.G	Y	48.62	2878.42	33	1.9	960.483	3	16.62	642000000	F3:259	9	753	785	Oxidation or Hydroxylation	P9:Oxidation or Hydroxylation:42.68;P15:Oxidation or Hydroxylation:48.34;P24:Oxidation or Hydroxylation:68.73
Sample 1	2	4	Collagen alpha-1(I) chain OS=Gallus gallus GN=COL1A1 PE=1 SV=3	P02457|CO1A1_CHICK	R.GPP(+15.99)GPMGPP(+15.99)GLAGPP(+15.99)GEAGR.E	Y	38.72	1815.86	20	1.9	908.938	2	17.06	32800000	F3:275	1	984	1003	Oxidation or Hydroxylation	P3:Oxidation or Hydroxylation:17.01;P9:Oxidation or Hydroxylation:30.46;P15:Oxidation or Hydroxylation:7.38
Sample 1	2	4	Collagen alpha-1(I) chain OS=Gallus gallus GN=COL1A1 PE=1 SV=3	P02457|CO1A1_CHICK	K.GATGAP(+15.99)GIAGAP(+15.99)GFPGAR(+15.99).G	Y	28.25	1571.77	18	1.3	786.893	2	17.12	244000000	F3:277	1	387	404	Oxidation or Hydroxylation	P6:Oxidation or Hydroxylation:58.70;P12:Oxidation or Hydroxylation:7.32;R18:Oxidation or Hydroxylation:5.77
Sample 1	2	4	Collagen alpha-1(I) chain OS=Gallus gallus GN=COL1A1 PE=1 SV=3	P02457|CO1A1_CHICK	R.GPP(+15.99)GPMGPP(+15.99)GLAGPPGEAGR(+15.99).E	Y	26.68	1815.86	20	0.9	908.937	2	17.26	32800000	F3:282	1	984	1003	Oxidation or Hydroxylation	P3:Oxidation or Hydroxylation:17.01;P9:Oxidation or Hydroxylation:12.28;R20:Oxidation or Hydroxylation:4.12
Sample 1	1	1	Collagen alpha-2(I) chain OS=Gallus gallus GN=COL1A2 PE=4 SV=1	tr|F1P0H9|F1P0H9_CHICK	R.GLP(+15.99)GESGAVGPAGPIGSR.G	Y	20.05	1593.81	18	1.4	797.914	2	17.65	253000000	F3:295	1	591	608	Oxidation or Hydroxylation	P3:Oxidation or Hydroxylation:47.82
Sample 1	1	1	Collagen alpha-2(I) chain OS=Gallus gallus GN=COL1A2 PE=4 SV=1	tr|F1P0H9|F1P0H9_CHICK	K.GETGPAGPP(+15.99)GFQGLP(+15.99)GPSGPAGEAGKPGER(+15.99).G	Y	52.54	2776.31	30	0.9	926.443	3	18.02	82300000	F3:309	2	543	572	Oxidation or Hydroxylation	P9:Oxidation or Hydroxylation:51.96;P15:Oxidation or Hydroxylation:128.65;R30:Oxidation or Hydroxylation:99.98
Sample 1	1	1	Collagen alpha-2(I) chain OS=Gallus gallus GN=COL1A2 PE=4 SV=1	tr|F1P0H9|F1P0H9_CHICK	R.VGPIGPAGNRGEPGN(+15.99)IGFPGP(+15.99)K.G	Y	26.4	2119.08	22	0.4	707.368	3	18.3		F3:318	1	476	497	Oxidation or Hydroxylation	N15:Oxidation or Hydroxylation:0.00;P21:Oxidation or Hydroxylation:0.00
Sample 1	1	1	Collagen alpha-2(I) chain OS=Gallus gallus GN=COL1A2 PE=4 SV=1	tr|F1P0H9|F1P0H9_CHICK	R.VGPIGPAGNRGEP(+15.99)GNIGFPGP(+15.99)K.G	Y	37.28	2119.08	22	1.1	1060.55	2	18.48		F3:324	3	476	497	Oxidation or Hydroxylation	P13:Oxidation or Hydroxylation:30.83;P21:Oxidation or Hydroxylation:0.00
Sample 1	2	4	Collagen alpha-1(I) chain OS=Gallus gallus GN=COL1A1 PE=1 SV=3	P02457|CO1A1_CHICK	R.GFSGLQGPP(+15.99)GPP(+15.99)GAP(+15.99)GEQGPSGASGPAGPR.G	Y	46.94	2688.25	30	1.8	897.093	3	18.69		F3:331	7	1101	1130	Oxidation or Hydroxylation	P9:Oxidation or Hydroxylation:40.83;P12:Oxidation or Hydroxylation:62.90;P15:Oxidation or Hydroxylation:72.07
Sample 1	2	4	Collagen alpha-1(I) chain OS=Gallus gallus GN=COL1A1 PE=1 SV=3	P02457|CO1A1_CHICK	R.GQAGVMGFP(+15.99)GPK.G	Y	41.78	1160.56	12	0.6	581.29	2	18.74		F3:333	4	564	575	Oxidation or Hydroxylation	P9:Oxidation or Hydroxylation:5.03
Sample 1	2	4	Collagen alpha-1(I) chain OS=Gallus gallus GN=COL1A1 PE=1 SV=3	P02457|CO1A1_CHICK	K.SAGVAVPGPMGPAGPR.G	Y	24.28	1419.73	16	1	710.873	2	18.77		F3:334	1	161	176
Sample 1	2	4	Collagen alpha-1(I) chain OS=Gallus gallus GN=COL1A1 PE=1 SV=3	P02457|CO1A1_CHICK	R.GQAGVM(+15.99)GFP(+15.99)GPK.G	Y	35.34	1176.56	12	0.4	589.287	2	18.82		F3:336	1	564	575	Oxidation (M); Oxidation or Hydroxylation	M6:Oxidation (M):1000.00;P9:Oxidation or Hydroxylation:0.00
Sample 1	2	4	Collagen alpha-1(I) chain OS=Gallus gallus GN=COL1A1 PE=1 SV=3	P02457|CO1A1_CHICK	R.GLP(+15.99)GTAGLPGM(+15.99)K.G	Y	32.57	1129.58	12	0.8	565.798	2	18.89		F3:338	1	243	254	Oxidation or Hydroxylation; Oxidation (M)	P3:Oxidation or Hydroxylation:134.33;M11:Oxidation (M):1000.00
Sample 1	1	1	Collagen alpha-2(I) chain OS=Gallus gallus GN=COL1A2 PE=4 SV=1	tr|F1P0H9|F1P0H9_CHICK	K.GAAGLP(+15.99)GVAGAP(+15.99)GLP(+15.99)GPR.G	Y	33.86	1561.82	18	1.2	781.919	2	19.22		F3:349	1	309	326	Oxidation or Hydroxylation	P6:Oxidation or Hydroxylation:112.13;P12:Oxidation or Hydroxylation:22.36;P15:Oxidation or Hydroxylation:5.47
Sample 1	2	4	Collagen alpha-1(I) chain OS=Gallus gallus GN=COL1A1 PE=1 SV=3	P02457|CO1A1_CHICK	R.GFP(+15.99)GLP(+15.99)GPSGEPGK.Q	Y	31.55	1327.64	14	0.9	664.828	2	19.3		F3:352	2	960	973	Oxidation or Hydroxylation	P3:Oxidation or Hydroxylation:9.34;P6:Oxidation or Hydroxylation:32.28
Sample 1	1	1	Collagen alpha-2(I) chain OS=Gallus gallus GN=COL1A2 PE=4 SV=1	tr|F1P0H9|F1P0H9_CHICK	R.GLPGESGAVGPAGPIGSR.G	Y	25.56	1577.82	18	1.1	789.916	2	19.35		F3:354	1	591	608
Sample 1	1	1	Collagen alpha-2(I) chain OS=Gallus gallus GN=COL1A2 PE=4 SV=1	tr|F1P0H9|F1P0H9_CHICK	R.VGPIGPAGN(+.98)RGEPGN(+15.99)IGFP(+15.99)GPK.G	Y	34.52	2120.06	22	1.8	1061.04	2	19.68		F3:365	2	476	497	Deamidation (NQ); Oxidation or Hydroxylation	N9:Deamidation (NQ):71.27;N15:Oxidation or Hydroxylation:0.00;P19:Oxidation or Hydroxylation:0.00
Sample 1	1	1	Collagen alpha-2(I) chain OS=Gallus gallus GN=COL1A2 PE=4 SV=1	tr|F1P0H9|F1P0H9_CHICK	R.GEIGLP(+15.99)GSSGPVGP(+15.99)PGNP(+15.99)GAN(+.98)GLP(+15.99)GAK.G	Y	28.25	2418.17	27	1.2	1210.09	2	19.78		F3:368	3	282	308	Oxidation or Hydroxylation; Deamidation (NQ)	P6:Oxidation or Hydroxylation:51.00;P14:Oxidation or Hydroxylation:9.34;P18:Oxidation or Hydroxylation:30.46;N21:Deamidation (NQ):55.21;P24:Oxidation or Hydroxylation:0.00
Sample 1	1	1	Collagen alpha-2(I) chain OS=Gallus gallus GN=COL1A2 PE=4 SV=1	tr|F1P0H9|F1P0H9_CHICK	R.GSDGSAGPTGPAGPIGAAGPP(+15.99)GFP(+15.99)GAPGAK(+15.99).G	Y	19.5	2520.19	30	1.2	841.071	3	20.37		F3:386	1	234	263	Oxidation or Hydroxylation	P21:Oxidation or Hydroxylation:6.59;P24:Oxidation or Hydroxylation:17.01;K30:Oxidation or Hydroxylation:0.00
Sample 1	4	7	Uncharacterized protein OS=Gallus gallus GN=AHSG PE=4 SV=1	tr|E1BZE1|E1BZE1_CHICK	K.VN(+.98)GQFSVLASK.C	Y	35.16	1149.6	11	1	575.809	2	20.4		F3:387	3	118	128	Deamidation (NQ)	N2:Deamidation (NQ):32.28
Sample 1	1	1	Collagen alpha-2(I) chain OS=Gallus gallus GN=COL1A2 PE=4 SV=1	tr|F1P0H9|F1P0H9_CHICK	R.GSDGSAGPTGPAGPIGAAGPP(+15.99)GFP(+15.99)GAP(+15.99)GAK.G	Y	45.29	2520.19	30	0.4	1261.1	2	20.46		F3:389	1	234	263	Oxidation or Hydroxylation	P21:Oxidation or Hydroxylation:110.43;P24:Oxidation or Hydroxylation:150.82;P27:Oxidation or Hydroxylation:144.36
Sample 1	5	6	Apolipoprotein A-I OS=Gallus gallus GN=APOA1 PE=1 SV=2	P08250|APOA1_CHICK	K.LADNLDTLSAAAAK.L	Y	40.41	1372.72	14	0.8	687.368	2	21.17		F3:412	3	69	82
Sample 1	5	6	Apolipoprotein A-I OS=Gallus gallus GN=APOA1 PE=1 SV=2	P08250|APOA1_CHICK	K.ASGKDAIAQFESSAVGK.Q	Y	46.49	1664.84	17	2	833.427	2	21.19		F3:413	2	47	63
Sample 1	1	1	Collagen alpha-2(I) chain OS=Gallus gallus GN=COL1A2 PE=4 SV=1	tr|F1P0H9|F1P0H9_CHICK	K.GETGPTGAIGPIGASGPP(+15.99)GPVGAAGPAGPR.G	Y	43.79	2538.28	30	1.7	1270.15	2	21.49		F3:423	5	747	776	Oxidation or Hydroxylation	P18:Oxidation or Hydroxylation:41.13
Sample 1	1	1	Collagen alpha-2(I) chain OS=Gallus gallus GN=COL1A2 PE=4 SV=1	tr|F1P0H9|F1P0H9_CHICK	K.GPKGETGPTGAIGPIGASGPP(+15.99)GPVGAAGPAGPRGDAGP(+15.99)PGMTGFPGAAGR(+15.99).V	Y	48.95	4349.12	50	1.7	1088.29	4	21.61		F3:427	1	744	793	Oxidation or Hydroxylation	P21:Oxidation or Hydroxylation:44.44;P38:Oxidation or Hydroxylation:97.96;R50:Oxidation or Hydroxylation:37.00
Sample 1	1	1	Collagen alpha-2(I) chain OS=Gallus gallus GN=COL1A2 PE=4 SV=1	tr|F1P0H9|F1P0H9_CHICK	R.GDP(+15.99)GPVGPVGPAGAFGPR.G	Y	47.82	1619.81	18	1.6	810.911	2	21.65		F3:428	4	978	995	Oxidation or Hydroxylation	P3:Oxidation or Hydroxylation:11.06
Sample 1	1	1	Collagen alpha-2(I) chain OS=Gallus gallus GN=COL1A2 PE=4 SV=1	tr|F1P0H9|F1P0H9_CHICK	R.GSDGSAGPTGPAGPIGAAGPPGF(+15.99)P(+15.99)GAPGAK(+15.99)GEIGPAGNVGPTGPAGPR.G	Y	17.68	4104.99	48	0.9	1027.26	4	21.87		F3:436	1	234	281	Oxidation or Hydroxylation	F23:Oxidation or Hydroxylation:42.68;P24:Oxidation or Hydroxylation:25.70;K30:Oxidation or Hydroxylation:29.98
Sample 1	1	1	Collagen alpha-2(I) chain OS=Gallus gallus GN=COL1A2 PE=4 SV=1	tr|F1P0H9|F1P0H9_CHICK	D.PGPVGPVGPAGAFGPR.G	Y	33.98	1431.76	16	1	716.889	2	22.07		F3:441	2	980	995
Sample 1	5	6	Apolipoprotein A-I OS=Gallus gallus GN=APOA1 PE=1 SV=2	P08250|APOA1_CHICK	R.IRDM(+15.99)VDVYLETVK.A	Y	33.56	1595.82	13	0.1	532.948	3	22.12		F3:443	3	34	46	Oxidation (M)	M4:Oxidation (M):1000.00
Sample 1	1	1	Collagen alpha-2(I) chain OS=Gallus gallus GN=COL1A2 PE=4 SV=1	tr|F1P0H9|F1P0H9_CHICK	R.GDPGPVGPVGPAGAFGPR.G	Y	46.86	1603.81	18	1.3	802.914	2	22.28		F3:448	4	978	995
Sample 1	1	1	Collagen alpha-2(I) chain OS=Gallus gallus GN=COL1A2 PE=4 SV=1	tr|F1P0H9|F1P0H9_CHICK	R.GFP(+15.99)GTP(+15.99)GLP(+15.99)GFK.G	Y	33.98	1221.6	12	0.4	611.809	2	22.3		F3:449	1	165	176	Oxidation or Hydroxylation	P3:Oxidation or Hydroxylation:12.28;P6:Oxidation or Hydroxylation:38.32;P9:Oxidation or Hydroxylation:0.00
Sample 1	1	1	Collagen alpha-2(I) chain OS=Gallus gallus GN=COL1A2 PE=4 SV=1	tr|F1P0H9|F1P0H9_CHICK	R.GDPGPVGPVGP(+15.99)AGAFGPR.G	Y	20.71	1619.81	18	0.9	810.911	2	22.38		F3:452	1	978	995	Oxidation or Hydroxylation	P11:Oxidation or Hydroxylation:0.00
Sample 1	1	1	Collagen alpha-2(I) chain OS=Gallus gallus GN=COL1A2 PE=4 SV=1	tr|F1P0H9|F1P0H9_CHICK	R.GLP(+15.99)GIAGATGEP(+15.99)GPLGVSGPPGAR(+15.99).G	Y	44.94	2132.09	24	1.2	1067.05	2	22.41		F3:453	4	882	905	Oxidation or Hydroxylation	P3:Oxidation or Hydroxylation:195.68;P12:Oxidation or Hydroxylation:30.83;R24:Oxidation or Hydroxylation:0.00
Sample 1	1	1	Collagen alpha-2(I) chain OS=Gallus gallus GN=COL1A2 PE=4 SV=1	tr|F1P0H9|F1P0H9_CHICK	K.GETGPTGAIGPIGASGP(+15.99)PGPVGAAGPAGPRGD(+15.99)AGPPGMTGFPGAAGR(+15.99).V	Y	36.45	4066.96	47	0.3	1017.75	4	23.17		F3:476	1	747	793	Oxidation or Hydroxylation	P17:Oxidation or Hydroxylation:34.08;D32:Oxidation or Hydroxylation:3.68;R47:Oxidation or Hydroxylation:2.52
Sample 1	1	1	Collagen alpha-2(I) chain OS=Gallus gallus GN=COL1A2 PE=4 SV=1	tr|F1P0H9|F1P0H9_CHICK	K.GETGPTGAIGPIGASGP(+15.99)PGPVGAAGPAGPRGDAGPP(+15.99)GMTGFP(+15.99)GAAGR.V	Y	47.87	4066.96	47	0.3	1356.66	3	23.24		F3:478	1	747	793	Oxidation or Hydroxylation	P17:Oxidation or Hydroxylation:79.12;P36:Oxidation or Hydroxylation:56.53;P42:Oxidation or Hydroxylation:50.19
Sample 1	1	1	Collagen alpha-2(I) chain OS=Gallus gallus GN=COL1A2 PE=4 SV=1	tr|F1P0H9|F1P0H9_CHICK	R.GSHGSQGP(+15.99)AGPPGPP(+15.99)GPP(+15.99)GPP(+15.99)GPN(+.98)GGGYEVGFDAEYYRA.D	Y	17.7	3768.64	39	-1.4	1257.22	3	23.35		F3:480	1	1080	1118	Oxidation or Hydroxylation; Deamidation (NQ)	P8:Oxidation or Hydroxylation:0.00;P15:Oxidation or Hydroxylation:25.11;P18:Oxidation or Hydroxylation:79.54;P21:Oxidation or Hydroxylation:73.87;N24:Deamidation (NQ):69.47
Sample 1	1	1	Collagen alpha-2(I) chain OS=Gallus gallus GN=COL1A2 PE=4 SV=1	tr|F1P0H9|F1P0H9_CHICK	K.AADFGPGPMGLM(+15.99)GPR.G	Y	27.85	1488.69	15	0.9	745.351	2	23.46		F3:482	1	84	98	Oxidation (M)	M12:Oxidation (M):22.45
Sample 1	1	1	Collagen alpha-2(I) chain OS=Gallus gallus GN=COL1A2 PE=4 SV=1	tr|F1P0H9|F1P0H9_CHICK	R.GLP(+15.99)GIAGATGEPGPLGVSGPPGAR(+15.99).G	Y	37.01	2116.09	24	1.4	1059.05	2	23.57		F3:485	1	882	905	Oxidation or Hydroxylation	P3:Oxidation or Hydroxylation:140.79;R24:Oxidation or Hydroxylation:0.00
Sample 1	5	6	Apolipoprotein A-I OS=Gallus gallus GN=APOA1 PE=1 SV=2	P08250|APOA1_CHICK	K.IRPFLDQFSAK.W	Y	39.47	1320.72	11	0.6	441.247	3	23.63		F3:487	2	120	130
Sample 1	5	6	Apolipoprotein A-I OS=Gallus gallus GN=APOA1 PE=1 SV=2	P08250|APOA1_CHICK	K.MTPLVQEFR.E	Y	36.84	1119.57	9	0.6	560.795	2	23.65		F3:488	1	230	238
Sample 1	1	1	Collagen alpha-2(I) chain OS=Gallus gallus GN=COL1A2 PE=4 SV=1	tr|F1P0H9|F1P0H9_CHICK	R.GLP(+15.99)GIAGATGEPGPLGVSGP(+15.99)PGAR.G	Y	41.55	2116.09	24	1.5	1059.05	2	23.85		F3:493	5	882	905	Oxidation or Hydroxylation	P3:Oxidation or Hydroxylation:161.68;P20:Oxidation or Hydroxylation:0.00
Sample 1	1	1	Collagen alpha-2(I) chain OS=Gallus gallus GN=COL1A2 PE=4 SV=1	tr|F1P0H9|F1P0H9_CHICK	G.Y(sub L)GGNFAAQYDPSKAADFGPGPMGLMGPR.G	Y	16.57	2871.31	28	-8.7	718.829	4	24.05		F3:499	1	71	98	Mutation
Sample 1	3	8	SPARC OS=Gallus gallus GN=SPARC PE=4 SV=1	tr|F1P291|F1P291_CHICK	K.EQDIDKDLVI	Y	25.44	1186.61	10	0.6	594.312	2	24.49		F3:511	3	289	298
Sample 1	6	3	Serum albumin OS=Gallus gallus GN=ALB PE=1 SV=2	P19121|ALBU_CHICK	R.SQC(+57.02)IM(+15.99)EAEFDEKPADLPSLVEK.Y	Y	39.32	2551.18	22	0.7	851.402	3	24.55		F3:513	1	315	336	Carbamidomethylation; Oxidation (M)	C3:Carbamidomethylation:1000.00;M5:Oxidation (M):1000.00
Sample 1	4	7	Uncharacterized protein OS=Gallus gallus GN=AHSG PE=4 SV=1	tr|E1BZE1|E1BZE1_CHICK	K.MVTEPSQDLIAEC(+57.02)QLYGHQPGVTYPHPGQDTSAGLVPSAGQGFTN(+.98)HNLK.I	Y	31.91	5247.47	49	3.2	875.588	6	24.87		F3:522	4	235	283	Carbamidomethylation; Deamidation (NQ)	C13:Carbamidomethylation:1000.00;N45:Deamidation (NQ):85.57
Sample 1	1	1	Collagen alpha-2(I) chain OS=Gallus gallus GN=COL1A2 PE=4 SV=1	tr|F1P0H9|F1P0H9_CHICK	A.Q(-17.03)YDPSK(+15.99)AADFGPGPMGLM(+15.99)GPR.G	Y	21.28	2205.98	21	0.7	1104	2	25.78		F3:543	2	78	98	Pyro-glu from Q; Oxidation or Hydroxylation; Oxidation (M)	Q1:Pyro-glu from Q:1000.00;K6:Oxidation or Hydroxylation:9.40;M18:Oxidation (M):9.42
Sample 1	2	4	Collagen alpha-1(I) chain OS=Gallus gallus GN=COL1A1 PE=1 SV=3	P02457|CO1A1_CHICK	K.SGEYWIDPNQGC(+57.02)NLDAIK.V	Y	32.77	2078.94	18	1.8	1040.48	2	26.02		F3:547	2	1260	1277	Carbamidomethylation	C12:Carbamidomethylation:1000.00
Sample 1	6	3	Serum albumin OS=Gallus gallus GN=ALB PE=1 SV=2	P19121|ALBU_CHICK	K.QSDINTC(+57.02)FGEEGANLIVQSR.A	Y	17.39	2237.04	20	-0.9	1119.53	2	26.3		F3:553	1	589	608	Carbamidomethylation	C7:Carbamidomethylation:1000.00
Sample 1	7	19	Uncharacterized protein OS=Gallus gallus GN=SERPINF1 PE=3 SV=1	tr|E1C7H6|E1C7H6_CHICK	R.LQSLFTSPDFTK.I	Y	36.18	1382.71	12	1.2	692.362	2	26.66		F3:561	2	337	348
Sample 1	3	8	SPARC OS=Gallus gallus GN=SPARC PE=4 SV=1	tr|F1P291|F1P291_CHICK	K.NVLITLYERDEDNNLLTEK.Q	Y	30.44	2291.16	19	1.5	764.73	3	27.49		F3:584	4	168	186
Sample 1	4	7	Uncharacterized protein OS=Gallus gallus GN=AHSG PE=4 SV=1	tr|E1BZE1|E1BZE1_CHICK	K.ISHNNPVAS(+79.97)ES(+79.97)SSSEFPSLLSAK.S	Y	20.06	2547.09	23	1	850.039	3	27.59		F3:587	1	284	306	Phosphorylation (STY)	S9:Phosphorylation (STY):0.00;S11:Phosphorylation (STY):0.00
Sample 1	3	8	SPARC OS=Gallus gallus GN=SPARC PE=4 SV=1	tr|F1P291|F1P291_CHICK	K.NVLITLYERDEDNN(+.98)LLTEK.Q	Y	20.44	2292.15	19	-0.8	765.056	3	27.8		F3:592	1	168	186	Deamidation (NQ)	N14:Deamidation (NQ):0.00
Sample 1	6	3	Serum albumin OS=Gallus gallus GN=ALB PE=1 SV=2	P19121|ALBU_CHICK	K.LLINLIK.R	Y	17.83	825.569	7	0.1	413.792	2	27.93		F3:596	1	556	562
Sample 1	4	7	Uncharacterized protein OS=Gallus gallus GN=AHSG PE=4 SV=1	tr|E1BZE1|E1BZE1_CHICK	K.DNLAAC(+57.02)QLLPEDQSNFGFC(+57.02)TAK.M	Y	22.2	2498.12	22	1.8	1250.07	2	28.18		F3:602	4	213	234	Carbamidomethylation	C6:Carbamidomethylation:1000.00;C19:Carbamidomethylation:1000.00
Sample 1	1	1	Collagen alpha-2(I) chain OS=Gallus gallus GN=COL1A2 PE=4 SV=1	tr|F1P0H9|F1P0H9_CHICK	A.Q(-17.03)Y(+15.99)DPSKAADFGPGPMGLMGPR.G	Y	28.07	2189.99	21	0.8	731.004	3	29.19		F3:623	1	78	98	Pyro-glu from Q; Oxidation or Hydroxylation	Q1:Pyro-glu from Q:1000.00;Y2:Oxidation or Hydroxylation:0.00
Sample 1	1	1	Collagen alpha-2(I) chain OS=Gallus gallus GN=COL1A2 PE=4 SV=1	tr|F1P0H9|F1P0H9_CHICK	R.LSHPEWSSGFYWIDPNQGC(+57.02)TADAIR.A	Y	18.7	2906.31	25	0	969.777	3	29.96		F3:642	1	1163	1187	Carbamidomethylation	C19:Carbamidomethylation:1000.00
Sample 1	5	6	Apolipoprotein A-I OS=Gallus gallus GN=APOA1 PE=1 SV=2	P08250|APOA1_CHICK	R.LISFLDELQK.S	Y	36.86	1204.67	10	0.7	603.343	2	30.18		F3:646	2	252	261
Sample 1	6	3	Serum albumin OS=Gallus gallus GN=ALB PE=1 SV=2	P19121|ALBU_CHICK	K.AVAMITFAQYLQR.C	Y	36.48	1510.8	13	1.2	756.407	2	31.58		F3:673	1	48	60
Sample 1	4	7	Uncharacterized protein OS=Gallus gallus GN=AHSG PE=4 SV=1	tr|E1BZE1|E1BZE1_CHICK	P.AAPPPPLGC(+57.02)DDPEIEAAAEFAVIYIN(+.98)GHSHHGYR.F	Y	43.09	3671.71	34	1.5	735.35	5	31.63		F3:675	5	21	54	Carbamidomethylation; Deamidation (NQ)	C9:Carbamidomethylation:1000.00;N26:Deamidation (NQ):1000.00
Sample 1	3	8	SPARC OS=Gallus gallus GN=SPARC PE=4 SV=1	tr|F1P291|F1P291_CHICK	K.NYNMYIFPVHWQFGQLDQHPIDGYLSHTELAPLRAPLIPMEHC(+57.02)TTR.F	Y	51.13	5505.66	46	1.2	1102.14	5	32.05		F3:686	7	218	263	Carbamidomethylation	C43:Carbamidomethylation:1000.00
Sample 1	7	19	Uncharacterized protein OS=Gallus gallus GN=SERPINF1 PE=3 SV=1	tr|E1C7H6|E1C7H6_CHICK	R.LTFPIEYHVDRPFLLVLR.D	Y	17.11	2227.25	18	1	557.821	4	32.12		F3:688	1	385	402
Sample 1	3	8	SPARC OS=Gallus gallus GN=SPARC PE=4 SV=1	tr|F1P291|F1P291_CHICK	K.NYNMYIFPVHWQFGQLDQHPIDGYLSHTELAPLR.A	Y	43.98	4098.98	34	1.1	1025.75	4	32.3		F3:692	4	218	251
Sample 1	3	8	SPARC OS=Gallus gallus GN=SPARC PE=4 SV=1	tr|F1P291|F1P291_CHICK	R.DFEKN(+.98)YNMYIFPVHWQFGQLDQHPIDGYLSHTELAPLR.A	Y	17.57	4619.2	38	5.3	924.852	5	32.62		F3:698	1	214	251	Deamidation (NQ)	N5:Deamidation (NQ):11.10
Sample 1	14	36	Uncharacterized protein OS=Gallus gallus GN=OMD PE=4 SV=1	tr|R4GF52|R4GF52_CHICK	R.NTFISLPNLIELNLGHNK.L	Y	23.63	2036.11	18	0.7	679.71	3	33.28		F3:714	2	274	291
Sample 1	6	3	Serum albumin OS=Gallus gallus GN=ALB PE=1 SV=2	P19121|ALBU_CHICK	K.C(+57.02)VANEDAPEC(+57.02)SKPLPSIILDEIC(+57.02)QVEK.L	Y	36.25	3113.47	27	1.6	1038.83	3	33.56		F3:721	2	80	106	Carbamidomethylation	C1:Carbamidomethylation:1000.00;C10:Carbamidomethylation:1000.00;C23:Carbamidomethylation:1000.00
Sample 1	4	7	Uncharacterized protein OS=Gallus gallus GN=AHSG PE=4 SV=1	tr|E1BZE1|E1BZE1_CHICK	A.APAAPPPPLGC(+57.02)DDPEIEAAAEFAVIYIN(+.98)GHSHHGYR.F	Y	47.43	3839.8	36	1.2	768.968	5	33.96		F3:733	12	19	54	Carbamidomethylation; Deamidation (NQ)	C11:Carbamidomethylation:1000.00;N28:Deamidation (NQ):1000.00
Sample 1	8	20	Vitronectin OS=Gallus gallus PE=2 SV=1	tr|O12945|O12945_CHICK	K.LISDVWGIEGPIDAAFTR.I	Y	39.72	1959.01	18	1.2	654.011	3	34.72		F3:747	5	193	210
Sample 1	8	21	Uncharacterized protein OS=Gallus gallus GN=VTN PE=4 SV=2	tr|E1C7A7|E1C7A7_CHICK	K.LISDVWGIEGPIDAAFTR.I	Y	39.72	1959.01	18	1.2	654.011	3	34.72		F3:747	5	193	210
Sample 1	11	1201	Transthyretin OS=Gallus gallus GN=TTR PE=1 SV=1	P27731|TTHY_CHICK	R.HYTIAALLSPFSYSTTAVVSDPQE	Y	29.35	2596.27	24	2	1299.14	2	34.89		F3:750	1	127	150
Sample 1	4	7	Uncharacterized protein OS=Gallus gallus GN=AHSG PE=4 SV=1	tr|E1BZE1|E1BZE1_CHICK	K.NPDVYLMLLEIGR.A	Y	37.33	1531.81	13	1.1	766.912	2	35.27		F3:754	1	172	184
Sample 1	12	1202	Thrombospondin-2 OS=Gallus gallus GN=THBS2 PE=2 SV=1	P35440|TSP2_CHICK	R.SC(+57.02)EELGTMFTELTGLR.I	Y	27.18	1842.85	16	2.8	922.434	2	35.51		F3:759	1	275	290	Carbamidomethylation	C2:Carbamidomethylation:1000.00
Sample 1	12	1203	Thrombospondin-2 OS=Gallus gallus GN=THBS2 PE=4 SV=2	tr|E1C3P2|E1C3P2_CHICK	R.SC(+57.02)EELGTMFTELTGLR.I	Y	27.18	1842.85	16	2.8	922.434	2	35.51		F3:759	1	310	325	Carbamidomethylation	C2:Carbamidomethylation:1000.00
Sample 1	10	43	Alpha-1 type XI collagen (Fragment) OS=Gallus gallus PE=2 SV=1	tr|Q90796|Q90796_CHICK	K.IDQVPIVDVMINDFGDQSQK.F	Y	26.64	2260.1	20	2.1	1131.06	2	35.58		F3:760	1	857	876
Sample 1	3	8	SPARC OS=Gallus gallus GN=SPARC PE=4 SV=1	tr|F1P291|F1P291_CHICK	R.FFEAC(+57.02)DLDNDKYIALEEWASC(+57.02)FGIK.E	Y	30.64	3040.36	25	2	1014.46	3	35.86		F3:763	3	264	288	Carbamidomethylation	C5:Carbamidomethylation:1000.00;C21:Carbamidomethylation:1000.00
Sample 1	3	8	SPARC OS=Gallus gallus GN=SPARC PE=4 SV=1	tr|F1P291|F1P291_CHICK	R.F(+15.99)FEAC(+57.02)DLDNDKYIALEEWASC(+57.02)FGIK.E	Y	12.37	3056.36	25	-0.2	1019.79	3	35.97		F3:766	1	264	288	Oxidation or Hydroxylation; Carbamidomethylation	F1:Oxidation or Hydroxylation:0.00;C5:Carbamidomethylation:1000.00;C21:Carbamidomethylation:1000.00
Sample 1	16	617	Uncharacterized protein OS=Gallus gallus GN=KNG1 PE=4 SV=2	tr|E1BX43|E1BX43_CHICK	A.TPLPFEFSDC(+57.02)DDPDVLEAVDTALQK.Y	Y	31.29	2821.3	25	0.3	941.441	3	36.02		F3:767	1	19	43	Carbamidomethylation	C10:Carbamidomethylation:1000.00
Sample 1	16	627	Kinogen HMW (Fragments) OS=Gallus gallus PE=1 SV=1	tr|Q7LZS0|Q7LZS0_CHICK	TPLPFEFSDC(+57.02)DDPDVLEAVDTALQK.Y	Y	31.29	2821.3	25	0.3	941.441	3	36.02		F3:767	1	1	25	Carbamidomethylation	C10:Carbamidomethylation:1000.00
Sample 1	3	8	SPARC OS=Gallus gallus GN=SPARC PE=4 SV=1	tr|F1P291|F1P291_CHICK	R.FFEAC(+57.02)DLDN(+.98)DKYIALEEWASC(+57.02)FGIK.E	Y	20.33	3041.35	25	4.7	1014.79	3	36.45		F3:773	1	264	288	Carbamidomethylation; Deamidation (NQ)	C5:Carbamidomethylation:1000.00;N9:Deamidation (NQ):1000.00;C21:Carbamidomethylation:1000.00
Sample 1	7	19	Uncharacterized protein OS=Gallus gallus GN=SERPINF1 PE=3 SV=1	tr|E1C7H6|E1C7H6_CHICK	K.IAQLPLTEGVSAMFFLPTK.V	Y	34.79	2062.12	19	1.1	1032.07	2	37.09		F3:781	4	266	284
Sample 1	2	4	Collagen alpha-1(I) chain OS=Gallus gallus GN=COL1A1 PE=1 SV=3	P02457|CO1A1_CHICK	R.GLTGPIGPP(+15.99)GPAGAPGD(+15.99)KGEAGPPGPAGP(+15.99)TGAR.G	Y	19.67	2878.42	33	3.5	960.484	3	37.98		F3:792	1	753	785	Oxidation or Hydroxylation	P9:Oxidation or Hydroxylation:10.11;D17:Oxidation or Hydroxylation:0.00;P29:Oxidation or Hydroxylation:0.00
Sample 1	7	19	Uncharacterized protein OS=Gallus gallus GN=SERPINF1 PE=3 SV=1	tr|E1C7H6|E1C7H6_CHICK	R.TATANVLLSPFSLATALSGLSLGAGERTEDVISR.A	Y	14.38	3416.81	34	0.5	1139.95	3	39.76		F3:808	2	71	104
Sample 1	12	1202	Thrombospondin-2 OS=Gallus gallus GN=THBS2 PE=2 SV=1	P35440|TSP2_CHICK	R.GLLQNIHLIFDTSIEDVLR.K	Y	33.99	2195.2	19	0.2	732.739	3	40.95		F3:818	1	210	228
Sample 1	12	1203	Thrombospondin-2 OS=Gallus gallus GN=THBS2 PE=4 SV=2	tr|E1C3P2|E1C3P2_CHICK	R.GLLQNIHLIFDTSIEDVLR.K	Y	33.99	2195.2	19	0.2	732.739	3	40.95		F3:818	1	245	263
Sample 1	7	19	Uncharacterized protein OS=Gallus gallus GN=SERPINF1 PE=3 SV=1	tr|E1C7H6|E1C7H6_CHICK	R.TATANVLLSPFSLATALSGLSLGAGER.T	Y	28.21	2616.41	27	0.2	873.145	3	41.01		F3:819	1	71	97
Sample 1	9	618	Uncharacterized protein OS=Gallus gallus GN=COL11A1 PE=4 SV=2	tr|F1P4K9|F1P4K9_CHICK	R.ILDEEVFEGEIQQLLIIADPR.A	Y	27.25	2439.29	21	1.6	814.105	3	41.87		F3:827	2	213	233
Sample 2	1	1	Collagen alpha-2(I) chain OS=Gallus gallus GN=COL1A2 PE=4 SV=1	tr|F1P0H9|F1P0H9_CHICK	R.GASGPVGAKGPN(+.98)GDAGR(+15.99)PGEPGLM(+15.99)GPR.G	Y	36.23	2491.19	27	1.2	623.805	4	14.08		F4:153	2	423	449	Deamidation (NQ); Oxidation or Hydroxylation; Oxidation (M)	N12:Deamidation (NQ):1000.00;R17:Oxidation or Hydroxylation:0.00;M24:Oxidation (M):1000.00
Sample 2	1	1	Collagen alpha-2(I) chain OS=Gallus gallus GN=COL1A2 PE=4 SV=1	tr|F1P0H9|F1P0H9_CHICK	R.GLHGEFGVPGP(+15.99)AGPRGER.G	Y	25.66	1804.9	18	0.5	602.64	3	14.85		F4:179	1	573	590	Oxidation or Hydroxylation	P11:Oxidation or Hydroxylation:0.00
Sample 2	1	1	Collagen alpha-2(I) chain OS=Gallus gallus GN=COL1A2 PE=4 SV=1	tr|F1P0H9|F1P0H9_CHICK	R.VGP(+15.99)P(+15.99)GPAGITGPP(+15.99)GPP(+15.99)GPAGK.D	Y	26.01	1840.93	21	1.4	921.475	2	15.59		F4:204	2	794	814	Oxidation or Hydroxylation	P3:Oxidation or Hydroxylation:38.16;P4:Oxidation or Hydroxylation:26.31;P13:Oxidation or Hydroxylation:14.02;P16:Oxidation or Hydroxylation:8.22
Sample 2	1	1	Collagen alpha-2(I) chain OS=Gallus gallus GN=COL1A2 PE=4 SV=1	tr|F1P0H9|F1P0H9_CHICK	R.GPP(+15.99)GPSGP(+15.99)PGKDGRN(+.98)GLPGPIGPAGVR.G	Y	12.76	2493.27	27	1	624.326	4	16.11		F4:222	1	1053	1079	Oxidation or Hydroxylation; Deamidation (NQ)	P3:Oxidation or Hydroxylation:17.01;P8:Oxidation or Hydroxylation:0.00;N15:Deamidation (NQ):1000.00
Sample 2	2	4	Collagen alpha-1(I) chain OS=Gallus gallus GN=COL1A1 PE=1 SV=3	P02457|CO1A1_CHICK	K.GSP(+15.99)GADGPIGAP(+15.99)GTP(+15.99)GPQGIAGQR.G	Y	27.44	2162.04	24	1.6	1082.03	2	16.38		F4:231	1	924	947	Oxidation or Hydroxylation	P3:Oxidation or Hydroxylation:0.00;P12:Oxidation or Hydroxylation:49.79;P15:Oxidation or Hydroxylation:17.01
Sample 2	2	4	Collagen alpha-1(I) chain OS=Gallus gallus GN=COL1A1 PE=1 SV=3	P02457|CO1A1_CHICK	R.GFP(+15.99)GADGIAGPK.G	Y	36.74	1101.55	12	0.8	551.78	2	17.31		F4:264	2	483	494	Oxidation or Hydroxylation	P3:Oxidation or Hydroxylation:10.11
Sample 2	2	4	Collagen alpha-1(I) chain OS=Gallus gallus GN=COL1A1 PE=1 SV=3	P02457|CO1A1_CHICK	R.GLTGPIGPP(+15.99)GPAGAPGDKGEAGPP(+15.99)GPAGPTGAR.G	Y	29.02	2862.43	33	2.3	955.151	3	17.54		F4:272	2	753	785	Oxidation or Hydroxylation	P9:Oxidation or Hydroxylation:9.40;P24:Oxidation or Hydroxylation:6.59
Sample 2	1	1	Collagen alpha-2(I) chain OS=Gallus gallus GN=COL1A2 PE=4 SV=1	tr|F1P0H9|F1P0H9_CHICK	K.GETGPAGPP(+15.99)GFQGLP(+15.99)GPSGPAGEAGKP(+15.99)GER.G	Y	50.94	2776.31	30	1	926.443	3	18.47	62900000	F4:304	2	543	572	Oxidation or Hydroxylation	P9:Oxidation or Hydroxylation:67.69;P15:Oxidation or Hydroxylation:67.69;P27:Oxidation or Hydroxylation:129.22
Sample 2	1	1	Collagen alpha-2(I) chain OS=Gallus gallus GN=COL1A2 PE=4 SV=1	tr|F1P0H9|F1P0H9_CHICK	R.VGPIGPAGNRGEP(+15.99)GNIGFP(+15.99)GPK.G	Y	40.98	2119.08	22	1.9	1060.55	2	18.61		F4:309	3	476	497	Oxidation or Hydroxylation	P13:Oxidation or Hydroxylation:33.18;P19:Oxidation or Hydroxylation:0.00
Sample 2	1	1	Collagen alpha-2(I) chain OS=Gallus gallus GN=COL1A2 PE=4 SV=1	tr|F1P0H9|F1P0H9_CHICK	R.VGPIGPAGNRGEP(+15.99)GNIGFPGPK(+15.99).G	Y	31.91	2119.08	22	0.9	707.368	3	18.7		F4:312	1	476	497	Oxidation or Hydroxylation	P13:Oxidation or Hydroxylation:15.73;K22:Oxidation or Hydroxylation:0.00
Sample 2	2	4	Collagen alpha-1(I) chain OS=Gallus gallus GN=COL1A1 PE=1 SV=3	P02457|CO1A1_CHICK	R.GFSGLQGP(+15.99)PGPP(+15.99)GAP(+15.99)GEQGPSGASGPAGPR.G	Y	18.95	2688.25	30	1.8	897.093	3	19.01		F4:323	1	1101	1130	Oxidation or Hydroxylation	P8:Oxidation or Hydroxylation:0.00;P12:Oxidation or Hydroxylation:0.00;P15:Oxidation or Hydroxylation:23.70
Sample 2	2	4	Collagen alpha-1(I) chain OS=Gallus gallus GN=COL1A1 PE=1 SV=3	P02457|CO1A1_CHICK	R.GQAGVM(+15.99)GFPGP(+15.99)K.G	Y	40.38	1176.56	12	0.4	589.287	2	19.1		F4:326	1	564	575	Oxidation (M); Oxidation or Hydroxylation	M6:Oxidation (M):1000.00;P11:Oxidation or Hydroxylation:0.00
Sample 2	1	1	Collagen alpha-2(I) chain OS=Gallus gallus GN=COL1A2 PE=4 SV=1	tr|F1P0H9|F1P0H9_CHICK	K.GAAGLP(+15.99)GVAGAP(+15.99)GLPGP(+15.99)R.G	Y	33.03	1561.82	18	1.2	781.919	2	19.22	307000000	F4:330	3	309	326	Oxidation or Hydroxylation	P6:Oxidation or Hydroxylation:137.20;P12:Oxidation or Hydroxylation:37.54;P17:Oxidation or Hydroxylation:0.00
Sample 2	1	1	Collagen alpha-2(I) chain OS=Gallus gallus GN=COL1A2 PE=4 SV=1	tr|F1P0H9|F1P0H9_CHICK	R.VGPIGPAGNRGEP(+15.99)GN(+.98)IGFPGPK(+15.99).G	Y	23.98	2120.06	22	0.3	707.696	3	19.38	70000000	F4:336	1	476	497	Oxidation or Hydroxylation; Deamidation (NQ)	P13:Oxidation or Hydroxylation:6.65;N15:Deamidation (NQ):5.14;K22:Oxidation or Hydroxylation:0.00
Sample 2	1	1	Collagen alpha-2(I) chain OS=Gallus gallus GN=COL1A2 PE=4 SV=1	tr|F1P0H9|F1P0H9_CHICK	K.GPKGETGPTGAIGPIGASGPP(+15.99)GPVGAAGPAGPR.G	Y	50.85	2820.45	33	0.9	941.159	3	19.47	33800000	F4:339	4	744	776	Oxidation or Hydroxylation	P21:Oxidation or Hydroxylation:81.81
Sample 2	1	1	Collagen alpha-2(I) chain OS=Gallus gallus GN=COL1A2 PE=4 SV=1	tr|F1P0H9|F1P0H9_CHICK	R.VGPIGPAGNRGEP(+15.99)GN(+.98)IGFPGP(+15.99)K.G	Y	25.67	2120.06	22	1.2	707.696	3	19.49	70000000	F4:340	1	476	497	Oxidation or Hydroxylation; Deamidation (NQ)	P13:Oxidation or Hydroxylation:0.00;N15:Deamidation (NQ):0.00;P21:Oxidation or Hydroxylation:0.00
Sample 2	1	1	Collagen alpha-2(I) chain OS=Gallus gallus GN=COL1A2 PE=4 SV=1	tr|F1P0H9|F1P0H9_CHICK	K.GP(+15.99)KGETGPTGAIGPIGASGPP(+15.99)GPVGAAGPAGPR.G	Y	46.39	2836.45	33	1.4	946.491	3	19.52		F4:341	4	744	776	Oxidation or Hydroxylation	P2:Oxidation or Hydroxylation:0.00;P21:Oxidation or Hydroxylation:81.81
Sample 2	2	4	Collagen alpha-1(I) chain OS=Gallus gallus GN=COL1A1 PE=1 SV=3	P02457|CO1A1_CHICK	R.GFSGLQGP(+15.99)PGPPGAP(+15.99)GEQGPSGASGPAGPR.G	Y	23.85	2672.26	30	1.2	891.761	3	19.55		F4:342	1	1101	1130	Oxidation or Hydroxylation	P8:Oxidation or Hydroxylation:0.00;P15:Oxidation or Hydroxylation:28.36
Sample 2	2	4	Collagen alpha-1(I) chain OS=Gallus gallus GN=COL1A1 PE=1 SV=3	P02457|CO1A1_CHICK	R.GFSGLQGPP(+15.99)GPPGAP(+15.99)GEQGPSGASGPAGPR.G	Y	44.77	2672.26	30	1.8	1337.14	2	19.6		F4:344	3	1101	1130	Oxidation or Hydroxylation	P9:Oxidation or Hydroxylation:83.89;P15:Oxidation or Hydroxylation:103.78
Sample 2	1	1	Collagen alpha-2(I) chain OS=Gallus gallus GN=COL1A2 PE=4 SV=1	tr|F1P0H9|F1P0H9_CHICK	R.N(+.98)GLP(+15.99)GPIGPAGVR.G	Y	32.55	1220.65	13	0.7	611.333	2	19.79		F4:350	3	1067	1079	Deamidation (NQ); Oxidation or Hydroxylation	N1:Deamidation (NQ):1000.00;P4:Oxidation or Hydroxylation:39.76
Sample 2	13	85	Uncharacterized protein OS=Gallus gallus GN=COL4A6 PE=4 SV=2	tr|F1P3T8|F1P3T8_CHICK	K.GD(+15.99)VGLPGP(+15.99)PGP(+15.99)PPSTGI.L	Y	14.74	1561.76	17	8	781.895	2	20.55		F4:375	1	239	255	Oxidation or Hydroxylation	D2:Oxidation or Hydroxylation:11.59;P8:Oxidation or Hydroxylation:11.06;P11:Oxidation or Hydroxylation:40.00
Sample 2	1	1	Collagen alpha-2(I) chain OS=Gallus gallus GN=COL1A2 PE=4 SV=1	tr|F1P0H9|F1P0H9_CHICK	K.GPKGETGPTGAIGPIGASGPP(+15.99)GPVGAAGPAGPRGDAGPPGMTGF(+15.99)P(+15.99)GAAGR.V	Y	43.93	4349.12	50	0.5	1088.29	4	21.46		F4:404	2	744	793	Oxidation or Hydroxylation	P21:Oxidation or Hydroxylation:107.72;F44:Oxidation or Hydroxylation:11.79;P45:Oxidation or Hydroxylation:72.99
Sample 2	1	1	Collagen alpha-2(I) chain OS=Gallus gallus GN=COL1A2 PE=4 SV=1	tr|F1P0H9|F1P0H9_CHICK	R.GSDGSAGPTGPAGPIGAAGP(+15.99)PGFP(+15.99)GAPGAK(+15.99)GEIGPAGNVGPTGPAGPR.G	Y	12.4	4104.99	48	1.6	1027.26	4	21.79		F4:415	1	234	281	Oxidation or Hydroxylation	P20:Oxidation or Hydroxylation:0.00;P24:Oxidation or Hydroxylation:12.33;K30:Oxidation or Hydroxylation:0.00
Sample 2	1	1	Collagen alpha-2(I) chain OS=Gallus gallus GN=COL1A2 PE=4 SV=1	tr|F1P0H9|F1P0H9_CHICK	R.GFP(+15.99)GTP(+15.99)GLPGF(+15.99)K.G	Y	34.59	1221.6	12	0.5	611.809	2	21.99		F4:421	2	165	176	Oxidation or Hydroxylation	P3:Oxidation or Hydroxylation:17.01;P6:Oxidation or Hydroxylation:44.44;F11:Oxidation or Hydroxylation:0.00
Sample 2	1	1	Collagen alpha-2(I) chain OS=Gallus gallus GN=COL1A2 PE=4 SV=1	tr|F1P0H9|F1P0H9_CHICK	R.GDN(sub P)GPVGPVGPAGAFGPR.G	Y	34.17	1620.8	18	5.6	811.412	2	22.04		F4:423	4	978	995	Mutation
Sample 2	5	6	Apolipoprotein A-I OS=Gallus gallus GN=APOA1 PE=1 SV=2	P08250|APOA1_CHICK	R.IRD(+15.99)MVDVYLETVK.A	Y	27.68	1595.82	13	1.4	532.949	3	22.17		F4:427	1	34	46	Oxidation or Hydroxylation	D3:Oxidation or Hydroxylation:14.02
Sample 2	1	1	Collagen alpha-2(I) chain OS=Gallus gallus GN=COL1A2 PE=4 SV=1	tr|F1P0H9|F1P0H9_CHICK	R.GFP(+15.99)GTP(+15.99)GLPGFK(+15.99).G	Y	32.15	1221.6	12	0.5	611.809	2	22.26		F4:430	1	165	176	Oxidation or Hydroxylation	P3:Oxidation or Hydroxylation:17.01;P6:Oxidation or Hydroxylation:38.16;K12:Oxidation or Hydroxylation:0.00
Sample 2	13	85	Uncharacterized protein OS=Gallus gallus GN=COL4A6 PE=4 SV=2	tr|F1P3T8|F1P3T8_CHICK	R.GDVGPPGLPVLGAQEQ(+.98)A.L	Y	24.05	1604.8	17	6.8	803.415	2	22.28		F4:431	1	957	973	Deamidation (NQ)	Q16:Deamidation (NQ):0.00
Sample 2	1	1	Collagen alpha-2(I) chain OS=Gallus gallus GN=COL1A2 PE=4 SV=1	tr|F1P0H9|F1P0H9_CHICK	R.GLP(+15.99)GIAGATGEP(+15.99)GPLGVSGP(+15.99)PGAR.G	Y	45.23	2132.09	24	1.3	1067.05	2	22.51		F4:438	7	882	905	Oxidation or Hydroxylation	P3:Oxidation or Hydroxylation:195.68;P12:Oxidation or Hydroxylation:36.05;P20:Oxidation or Hydroxylation:0.00
Sample 2	13	85	Uncharacterized protein OS=Gallus gallus GN=COL4A6 PE=4 SV=2	tr|F1P3T8|F1P3T8_CHICK	R.GDVGPPGLPVLGAQ(+.98)EQA.L	Y	19.19	1604.8	17	6.8	803.415	2	22.64		F4:443	1	957	973	Deamidation (NQ)	Q14:Deamidation (NQ):0.00
Sample 2	1	1	Collagen alpha-2(I) chain OS=Gallus gallus GN=COL1A2 PE=4 SV=1	tr|F1P0H9|F1P0H9_CHICK	R.GLP(+15.99)GIAGATGEPGP(+15.99)LGVSGPPGAR(+15.99).G	Y	34.22	2132.09	24	0.6	711.703	3	22.77		F4:447	3	882	905	Oxidation or Hydroxylation	P3:Oxidation or Hydroxylation:97.31;P14:Oxidation or Hydroxylation:0.00;R24:Oxidation or Hydroxylation:6.65
Sample 2	1	1	Collagen alpha-2(I) chain OS=Gallus gallus GN=COL1A2 PE=4 SV=1	tr|F1P0H9|F1P0H9_CHICK	K.GETGPTGAIGPIGASGP(+15.99)PGPVGAAGPAGPRGD(+15.99)AGPPGMTGFP(+15.99)GAAGR.V	Y	29.91	4066.96	47	1.8	1017.75	4	23.21		F4:457	1	747	793	Oxidation or Hydroxylation	P17:Oxidation or Hydroxylation:0.00;D32:Oxidation or Hydroxylation:0.00;P42:Oxidation or Hydroxylation:0.00
Sample 2	1	1	Collagen alpha-2(I) chain OS=Gallus gallus GN=COL1A2 PE=4 SV=1	tr|F1P0H9|F1P0H9_CHICK	K.GETGPTGAIGPIGASGP(+15.99)PGPVGAAGPAGPRGDAGPPGM(+15.99)TGFPGAAGR(+15.99).V	Y	50.04	4066.96	47	0.7	1356.66	3	23.25		F4:458	1	747	793	Oxidation or Hydroxylation; Oxidation (M)	P17:Oxidation or Hydroxylation:63.05;M38:Oxidation (M):1000.00;R47:Oxidation or Hydroxylation:34.30
Sample 2	5	6	Apolipoprotein A-I OS=Gallus gallus GN=APOA1 PE=1 SV=2	P08250|APOA1_CHICK	K.DAIAQFESSAVGK.Q	Y	42.9	1321.65	13	0.4	661.833	2	23.74		F4:467	2	51	63
Sample 2	2	4	Collagen alpha-1(I) chain OS=Gallus gallus GN=COL1A1 PE=1 SV=3	P02457|CO1A1_CHICK	P.Q(-17.03)MSYGYDEK(+15.99)SAGVAVPGPMGPAGPR.G	Y	18.13	2520.14	25	0.6	841.055	3	24.11		F4:474	1	152	176	Pyro-glu from Q; Oxidation or Hydroxylation	Q1:Pyro-glu from Q:1000.00;K9:Oxidation or Hydroxylation:9.40
Sample 2	4	7	Uncharacterized protein OS=Gallus gallus GN=AHSG PE=4 SV=1	tr|E1BZE1|E1BZE1_CHICK	K.MVTEPSQDLIAEC(+57.02)QLYGHQPGVTYPHPGQDTSAGLVPSAGQGFTNHNLK.I	Y	14.5	5246.48	49	2.2	1050.31	5	24.51		F4:484	1	235	283	Carbamidomethylation	C13:Carbamidomethylation:1000.00
Sample 2	4	7	Uncharacterized protein OS=Gallus gallus GN=AHSG PE=4 SV=1	tr|E1BZE1|E1BZE1_CHICK	K.MVTEPSQDLIAEC(+57.02)QLYGHQPGVTYPHPGQDTSAGLVPSAGQ(+.98)GFTNHNLK.I	Y	33.97	5247.47	49	4.6	875.589	6	24.68		F4:489	1	235	283	Carbamidomethylation; Deamidation (NQ)	C13:Carbamidomethylation:1000.00;Q41:Deamidation (NQ):0.00
Sample 2	6	3	Serum albumin OS=Gallus gallus GN=ALB PE=1 SV=2	P19121|ALBU_CHICK	K.TIADGFTAMVDK.C	Y	41.67	1267.61	12	0.7	634.814	2	25.31		F4:507	2	574	585
Sample 2	2	4	Collagen alpha-1(I) chain OS=Gallus gallus GN=COL1A1 PE=1 SV=3	P02457|CO1A1_CHICK	K.ALLLQGANEIEIR.A	Y	41.8	1438.81	13	1.4	720.415	2	26.45		F4:528	2	1376	1388
Sample 2	1	1	Collagen alpha-2(I) chain OS=Gallus gallus GN=COL1A2 PE=4 SV=1	tr|F1P0H9|F1P0H9_CHICK	K.AADFGPGPMGLMGPR.G	Y	47.09	1472.69	15	1.3	737.354	2	26.78		F4:537	3	84	98
Sample 2	1	1	Collagen alpha-2(I) chain OS=Gallus gallus GN=COL1A2 PE=4 SV=1	tr|F1P0H9|F1P0H9_CHICK	K.AADFGPGPM(+15.99)GLM(+15.99)GPR.G	Y	42.62	1504.68	15	1	753.348	2	26.83		F4:539	2	84	98	Oxidation (M)	M9:Oxidation (M):1000.00;M12:Oxidation (M):1000.00
Sample 2	1	1	Collagen alpha-2(I) chain OS=Gallus gallus GN=COL1A2 PE=4 SV=1	tr|F1P0H9|F1P0H9_CHICK	K.AADFGPGPM(+15.99)GLMGPR.G	Y	42.38	1488.69	15	1.2	745.351	2	26.91		F4:541	2	84	98	Oxidation (M)	M9:Oxidation (M):13.93
Sample 2	1	1	Collagen alpha-2(I) chain OS=Gallus gallus GN=COL1A2 PE=4 SV=1	tr|F1P0H9|F1P0H9_CHICK	R.TGEQGIAGP(+15.99)PGFAGEKGPSGEAGAAGP(+15.99)PGTP(+15.99)GPQGILGAP(+15.99)GILGLP(+15.99)GSR.G	Y	20.27	4439.2	49	1.7	1480.74	3	26.94		F4:542	1	830	878	Oxidation or Hydroxylation	P9:Oxidation or Hydroxylation:0.00;P27:Oxidation or Hydroxylation:24.85;P31:Oxidation or Hydroxylation:28.20;P40:Oxidation or Hydroxylation:58.06;P46:Oxidation or Hydroxylation:110.54
Sample 2	3	8	SPARC OS=Gallus gallus GN=SPARC PE=4 SV=1	tr|F1P291|F1P291_CHICK	K.NVLITLYERDEDN(+.98)NLLTEK.Q	Y	20.85	2292.15	19	-1.3	765.056	3	27.86		F4:565	2	168	186	Deamidation (NQ)	N13:Deamidation (NQ):12.28
Sample 2	1	1	Collagen alpha-2(I) chain OS=Gallus gallus GN=COL1A2 PE=4 SV=1	tr|F1P0H9|F1P0H9_CHICK	A.Q(-17.03)YDPSK(+15.99)AADFGPGPMGLMGPR.G	Y	39.47	2189.99	21	1.8	731.004	3	28.77		F4:586	4	78	98	Pyro-glu from Q; Oxidation or Hydroxylation	Q1:Pyro-glu from Q:1000.00;K6:Oxidation or Hydroxylation:11.10
Sample 2	1	1	Collagen alpha-2(I) chain OS=Gallus gallus GN=COL1A2 PE=4 SV=1	tr|F1P0H9|F1P0H9_CHICK	R.DGED(+15.99)GP(+15.99)P(+15.99)GPPGPPGPPGLGGNFAAQYDPSKAADFGPGPMGLMGPR.G	Y	34.19	4346.96	45	9.8	1087.76	4	29.03		F4:591	1	54	98	Oxidation or Hydroxylation	D4:Oxidation or Hydroxylation:0.00;P6:Oxidation or Hydroxylation:0.00;P7:Oxidation or Hydroxylation:0.00
Sample 2	1	1	Collagen alpha-2(I) chain OS=Gallus gallus GN=COL1A2 PE=4 SV=1	tr|F1P0H9|F1P0H9_CHICK	A.Q(-17.03)YDPSKAADFGPGPMGLMGPR.G	Y	36.37	2173.99	21	-0.2	725.671	3	29.17		F4:595	1	78	98	Pyro-glu from Q	Q1:Pyro-glu from Q:1000.00
Sample 2	6	3	Serum albumin OS=Gallus gallus GN=ALB PE=1 SV=2	P19121|ALBU_CHICK	R.VSFLGHFIYSVAR.R	Y	40.27	1494.8	13	0.8	499.274	3	30.03		F4:612	4	160	172
Sample 2	5	6	Apolipoprotein A-I OS=Gallus gallus GN=APOA1 PE=1 SV=2	P08250|APOA1_CHICK	R.EM(+15.99)WLKDTEALRAELTKDLEEVKEK.I	Y	46.48	2919.49	24	0.9	584.906	5	30.42		F4:619	1	96	119	Oxidation (M)	M2:Oxidation (M):1000.00
Sample 2	3	8	SPARC OS=Gallus gallus GN=SPARC PE=4 SV=1	tr|F1P291|F1P291_CHICK	K.NYNMYIFPVHWQFGQLDQHPIDGYLSHTELAPLRAP(+15.99)LIPMEHC(+57.02)TTR.F	Y	22.34	5521.66	46	2.6	921.286	6	31.3		F4:637	1	218	263	Oxidation or Hydroxylation; Carbamidomethylation	P36:Oxidation or Hydroxylation:0.00;C43:Carbamidomethylation:1000.00
Sample 2	6	3	Serum albumin OS=Gallus gallus GN=ALB PE=1 SV=2	P19121|ALBU_CHICK	K.YVPPPFNPDMFSFDEK.L	Y	27.79	1928.87	16	1.1	965.441	2	31.88		F4:647	4	525	540
Sample 2	15	1205	Uncharacterized protein (Fragment) OS=Gallus gallus GN=KRT8 PE=3 SV=2	tr|H9KZP2|H9KZP2_CHICK	R.SLDLDSIIAEVK.A	Y	37.04	1301.71	12	0.8	651.862	2	32.28		F4:657	1	148	159
Sample 2	3	8	SPARC OS=Gallus gallus GN=SPARC PE=4 SV=1	tr|F1P291|F1P291_CHICK	K.FIPAC(+57.02)LDTELTEFPLR.M	Y	45.6	1920.97	16	1	961.491	2	32.56		F4:663	7	146	161	Carbamidomethylation	C5:Carbamidomethylation:1000.00
Sample 2	9	618	Uncharacterized protein OS=Gallus gallus GN=COL11A1 PE=4 SV=2	tr|F1P4K9|F1P4K9_CHICK	K.QLYPDGDFPEDFSILMTVKPK.K	Y	36.65	2439.2	21	1.5	814.076	3	32.72		F4:667	2	91	111
Sample 2	3	8	SPARC OS=Gallus gallus GN=SPARC PE=4 SV=1	tr|F1P291|F1P291_CHICK	A.APQEALPDETEVIEDLTTEGPVGAN(+.98)PVQVEVGEFEEPTEDVEEIVAENPC(+57.02)QNHHC(+57.02)K.H	Y	13.11	6224.81	56	2.3	1245.97	5	34.66		F4:713	1	18	73	Deamidation (NQ); Carbamidomethylation	N25:Deamidation (NQ):0.00;C50:Carbamidomethylation:1000.00;C55:Carbamidomethylation:1000.00
Sample 2	7	19	Uncharacterized protein OS=Gallus gallus GN=SERPINF1 PE=3 SV=1	tr|E1C7H6|E1C7H6_CHICK	R.LTFPIEYHVDRPFLLVLRDDTTGTLLFIGK.I	Y	37.95	3488.91	30	0.6	873.235	4	34.98		F4:717	4	385	414
Sample 2	11	1201	Transthyretin OS=Gallus gallus GN=TTR PE=1 SV=1	P27731|TTHY_CHICK	K.TTEFGEIHELTTEEQFVEGVYRVEFDTSSYWK.G	Y	34.97	3855.78	32	1.3	964.953	4	35.82		F4:730	1	72	103
Sample 2	4	7	Uncharacterized protein OS=Gallus gallus GN=AHSG PE=4 SV=1	tr|E1BZE1|E1BZE1_CHICK	N.PDVYLMLLEIGR.A	Y	31.86	1417.76	12	1.4	709.89	2	36.24		F4:737	1	173	184
Sample 2	1	1	Collagen alpha-2(I) chain OS=Gallus gallus GN=COL1A2 PE=4 SV=1	tr|F1P0H9|F1P0H9_CHICK	R.LPILDIAPLDIGGADQEFGLHIGPVC(+57.02)FK	Y	40.55	3004.57	28	0.7	1002.53	3	36.93		F4:745	2	1336	1363	Carbamidomethylation	C26:Carbamidomethylation:1000.00
Sample 2	10	43	Alpha-1 type XI collagen (Fragment) OS=Gallus gallus PE=2 SV=1	tr|Q90796|Q90796_CHICK	K.FGFEVGPVC(+57.02)FLG	Y	40.35	1327.63	12	0.3	664.821	2	38.67		F4:763	2	877	888	Carbamidomethylation	C9:Carbamidomethylation:1000.00
Sample 2	2	4	Collagen alpha-1(I) chain OS=Gallus gallus GN=COL1A1 PE=1 SV=3	P02457|CO1A1_CHICK	R.GLTGPIGPP(+15.99)GPAGAPGD(+15.99)KGEAGPP(+15.99)GPAGPTGAR.G	Y	32	2878.42	33	0.1	960.481	3	40.2		F4:776	6	753	785	Oxidation or Hydroxylation	P9:Oxidation or Hydroxylation:10.11;D17:Oxidation or Hydroxylation:0.00;P24:Oxidation or Hydroxylation:2.21
Sample 2	2	4	Collagen alpha-1(I) chain OS=Gallus gallus GN=COL1A1 PE=1 SV=3	P02457|CO1A1_CHICK	K.TSRLPIIDLAPMDVGAPDQEFGIDIGPVC(+57.02)FL	Y	21.73	3355.68	31	1.1	1119.57	3	40.66		F4:780	2	1423	1453	Carbamidomethylation	C29:Carbamidomethylation:1000.00
Sample 2	2	4	Collagen alpha-1(I) chain OS=Gallus gallus GN=COL1A1 PE=1 SV=3	P02457|CO1A1_CHICK	R.GLTGPIGPPGP(+15.99)AGAP(+15.99)GDKGEAGPP(+15.99)GPAGPTGAR.G	Y	14.34	2878.42	33	0.9	960.482	3	42.61		F4:796	1	753	785	Oxidation or Hydroxylation	P11:Oxidation or Hydroxylation:0.00;P15:Oxidation or Hydroxylation:0.00;P24:Oxidation or Hydroxylation:9.34
