# Supplementary material for: Bone protein “extractomics”: comparing the efficiency of bone protein extractions of Gallus gallus in tandem mass spectrometry, with an eye towards paleoproteomics
Source: PeerJ. 2016 Oct 27;4:e2603. doi: 10.7717/peerj.2603 (PMC5088622; doi:10.7717/peerj.2603)
Supplement: Table S22 [file peerj-04-2603-s026.xlsx]

## Sheet: SGP_protein-peptides.csv
Table S22. Peptides identified in samples from Method 5, precipitated GuHCl (8 mL/g), post-EDTA (8-E/GuHCl-P) @ 1% FDR
Sample #	Protein Group	Protein ID	Protein Description	Protein Accession	Peptide	Unique	-10lgP	Mass	Length	ppm	m/z	z	RT	Area	Scan	#Spec	Start	End	PTM	AScore
Sample 1	1	1	Collagen alpha-2(I) chain OS=Gallus gallus GN=COL1A2 PE=4 SV=1	tr|F1P0H9|F1P0H9_CHICK	R.GASGPVGAKGPN(+.98)GDAGRPGEPGLM(+31.99)GPR.G	N	26.4	2491.19	27	1	623.805	4	14.49		F33:160	1	423	449	Deamidation (NQ); Sulphone	N12:Deamidation (NQ):1000.00;M24:Sulphone:1000.00
Sample 1	2	5	Collagen alpha-2(I) chain (Fragments) OS=Gallus gallus GN=COL1A2 PE=1 SV=2	P02467|CO1A2_CHICK	R.GASGPVGAKGPN(+.98)GDAGRPGEPGLM(+31.99)GPR.X	N	26.4	2491.19	27	1	623.805	4	14.49		F33:160	1	422	448	Deamidation (NQ); Sulphone	N12:Deamidation (NQ):1000.00;M24:Sulphone:1000.00
Sample 1	1	1	Collagen alpha-2(I) chain OS=Gallus gallus GN=COL1A2 PE=4 SV=1	tr|F1P0H9|F1P0H9_CHICK	R.GLHGEFGVPGPAGPRGER(+15.99).G	N	31.65	1804.9	18	0.5	602.64	3	15.07		F33:179	1	573	590	Oxidation or Hydroxylation	R18:Oxidation or Hydroxylation:0.00
Sample 1	2	5	Collagen alpha-2(I) chain (Fragments) OS=Gallus gallus GN=COL1A2 PE=1 SV=2	P02467|CO1A2_CHICK	R.GLHGEFGVPGPAGPRGER(+15.99).G	N	31.65	1804.9	18	0.5	602.64	3	15.07		F33:179	1	572	589	Oxidation or Hydroxylation	R18:Oxidation or Hydroxylation:0.00
Sample 1	1	1	Collagen alpha-2(I) chain OS=Gallus gallus GN=COL1A2 PE=4 SV=1	tr|F1P0H9|F1P0H9_CHICK	R.GP(+15.99)SGPPGPDGNKGEP(+15.99)GNVGPAGAP(+15.99)GPAGPGGIP(+15.99)GER.G	Y	30.9	3191.49	36	0.8	1064.84	3	15.09		F33:180	1	609	644	Oxidation or Hydroxylation	P2:Oxidation or Hydroxylation:0.00;P15:Oxidation or Hydroxylation:46.87;P24:Oxidation or Hydroxylation:52.68;P33:Oxidation or Hydroxylation:28.70
Sample 1	1	1	Collagen alpha-2(I) chain OS=Gallus gallus GN=COL1A2 PE=4 SV=1	tr|F1P0H9|F1P0H9_CHICK	R.VGP(+15.99)P(+15.99)GPAGITGPP(+15.99)GPP(+15.99)GPAGK.D	Y	26.05	1840.93	21	1.2	921.474	2	15.88		F33:206	2	794	814	Oxidation or Hydroxylation	P3:Oxidation or Hydroxylation:12.33;P4:Oxidation or Hydroxylation:14.04;P13:Oxidation or Hydroxylation:14.02;P16:Oxidation or Hydroxylation:0.00
Sample 1	1	1	Collagen alpha-2(I) chain OS=Gallus gallus GN=COL1A2 PE=4 SV=1	tr|F1P0H9|F1P0H9_CHICK	R.GLP(+15.99)GAIGAP(+15.99)GPAGGAGDRGEGGPAGPAGPAGAR.G	N	30.34	2724.33	33	1.3	909.119	3	16.04		F33:212	4	675	707	Oxidation or Hydroxylation	P3:Oxidation or Hydroxylation:131.34;P9:Oxidation or Hydroxylation:22.85
Sample 1	2	5	Collagen alpha-2(I) chain (Fragments) OS=Gallus gallus GN=COL1A2 PE=1 SV=2	P02467|CO1A2_CHICK	R.GLP(+15.99)GAIGAP(+15.99)GPAGGAGDRGEGGPAGPAGPAGAR.G	N	30.34	2724.33	33	1.3	909.119	3	16.04		F33:212	4	674	706	Oxidation or Hydroxylation	P3:Oxidation or Hydroxylation:131.34;P9:Oxidation or Hydroxylation:22.85
Sample 1	1	1	Collagen alpha-2(I) chain OS=Gallus gallus GN=COL1A2 PE=4 SV=1	tr|F1P0H9|F1P0H9_CHICK	R.GPP(+15.99)GPSGPPGK(+15.99)DGRN(+.98)GLPGPIGPAGVR.G	N	17.93	2493.27	27	0.5	624.326	4	16.16		F33:216	1	1053	1079	Oxidation or Hydroxylation; Deamidation (NQ)	P3:Oxidation or Hydroxylation:17.01;K11:Oxidation or Hydroxylation:0.00;N15:Deamidation (NQ):1000.00
Sample 1	2	5	Collagen alpha-2(I) chain (Fragments) OS=Gallus gallus GN=COL1A2 PE=1 SV=2	P02467|CO1A2_CHICK	R.GPP(+15.99)GPSGPPGK(+15.99)DGRN(+.98)GLPGPIGPAGVR.G	N	17.93	2493.27	27	0.5	624.326	4	16.16		F33:216	1	1052	1078	Oxidation or Hydroxylation; Deamidation (NQ)	P3:Oxidation or Hydroxylation:17.01;K11:Oxidation or Hydroxylation:0.00;N15:Deamidation (NQ):1000.00
Sample 1	3	4	Collagen alpha-1(I) chain OS=Gallus gallus GN=COL1A1 PE=1 SV=3	P02457|CO1A1_CHICK	R.GLTGPIGPPGPAGAPGDK(+42.01)GE(+21.98)AGPPGPAGPTGAR.G	Y	19.28	2894.43	33	-2	965.815	3	16.51		F33:228	1	753	785	Acetylation (K); Sodium adduct	K18:Acetylation (K):1000.00;E20:Sodium adduct:0.00
Sample 1	3	4	Collagen alpha-1(I) chain OS=Gallus gallus GN=COL1A1 PE=1 SV=3	P02457|CO1A1_CHICK	K.GSP(+15.99)GADGPIGAP(+15.99)GTP(+15.99)GPQGIAGQR.G	Y	31.82	2162.04	24	1.3	1082.03	2	16.7		F33:234	2	924	947	Oxidation or Hydroxylation	P3:Oxidation or Hydroxylation:0.00;P12:Oxidation or Hydroxylation:46.62;P15:Oxidation or Hydroxylation:15.73
Sample 1	1	1	Collagen alpha-2(I) chain OS=Gallus gallus GN=COL1A2 PE=4 SV=1	tr|F1P0H9|F1P0H9_CHICK	R.GLHGEFGVP(+15.99)GPAGPR.G	N	19.47	1462.73	15	0.6	488.585	3	16.78		F33:237	3	573	587	Oxidation or Hydroxylation	P9:Oxidation or Hydroxylation:32.28
Sample 1	2	5	Collagen alpha-2(I) chain (Fragments) OS=Gallus gallus GN=COL1A2 PE=1 SV=2	P02467|CO1A2_CHICK	R.GLHGEFGVP(+15.99)GPAGPR.G	N	19.47	1462.73	15	0.6	488.585	3	16.78		F33:237	3	572	586	Oxidation or Hydroxylation	P9:Oxidation or Hydroxylation:32.28
Sample 1	1	1	Collagen alpha-2(I) chain OS=Gallus gallus GN=COL1A2 PE=4 SV=1	tr|F1P0H9|F1P0H9_CHICK	K.GETGPAGPP(+15.99)GFQGLP(+15.99)GPSGPAGEAGKPGER(+15.99).G	N	47.68	2776.31	30	0.6	926.443	3	18.13		F33:282	2	543	572	Oxidation or Hydroxylation	P9:Oxidation or Hydroxylation:63.97;P15:Oxidation or Hydroxylation:30.57;R30:Oxidation or Hydroxylation:21.51
Sample 1	2	5	Collagen alpha-2(I) chain (Fragments) OS=Gallus gallus GN=COL1A2 PE=1 SV=2	P02467|CO1A2_CHICK	K.GETGPAGPP(+15.99)GFQGLP(+15.99)GPSGPAGEAGKPGER(+15.99).G	N	47.68	2776.31	30	0.6	926.443	3	18.13		F33:282	2	542	571	Oxidation or Hydroxylation	P9:Oxidation or Hydroxylation:63.97;P15:Oxidation or Hydroxylation:30.57;R30:Oxidation or Hydroxylation:21.51
Sample 1	1	1	Collagen alpha-2(I) chain OS=Gallus gallus GN=COL1A2 PE=4 SV=1	tr|F1P0H9|F1P0H9_CHICK	R.VGPIGPAGNRGEPGN(+15.99)IGFP(+15.99)GPK.G	N	32.2	2119.08	22	1.3	707.369	3	18.39		F33:291	2	476	497	Oxidation or Hydroxylation	N15:Oxidation or Hydroxylation:0.00;P19:Oxidation or Hydroxylation:0.00
Sample 1	2	5	Collagen alpha-2(I) chain (Fragments) OS=Gallus gallus GN=COL1A2 PE=1 SV=2	P02467|CO1A2_CHICK	R.VGPIGPAGNRGEPGN(+15.99)IGFP(+15.99)GPK.G	N	32.2	2119.08	22	1.3	707.369	3	18.39		F33:291	2	475	496	Oxidation or Hydroxylation	N15:Oxidation or Hydroxylation:0.00;P19:Oxidation or Hydroxylation:0.00
Sample 1	1	1	Collagen alpha-2(I) chain OS=Gallus gallus GN=COL1A2 PE=4 SV=1	tr|F1P0H9|F1P0H9_CHICK	R.VGPIGPAGNRGEP(+15.99)GNIGFPGP(+15.99)K.G	N	28.94	2119.08	22	0.9	707.368	3	18.51		F33:295	1	476	497	Oxidation or Hydroxylation	P13:Oxidation or Hydroxylation:11.10;P21:Oxidation or Hydroxylation:0.00
Sample 1	2	5	Collagen alpha-2(I) chain (Fragments) OS=Gallus gallus GN=COL1A2 PE=1 SV=2	P02467|CO1A2_CHICK	R.VGPIGPAGNRGEP(+15.99)GNIGFPGP(+15.99)K.G	N	28.94	2119.08	22	0.9	707.368	3	18.51		F33:295	1	475	496	Oxidation or Hydroxylation	P13:Oxidation or Hydroxylation:11.10;P21:Oxidation or Hydroxylation:0.00
Sample 1	3	4	Collagen alpha-1(I) chain OS=Gallus gallus GN=COL1A1 PE=1 SV=3	P02457|CO1A1_CHICK	R.GFSGLQGP(+15.99)PGPP(+15.99)GAP(+15.99)GEQGPSGASGPAGPR.G	Y	32.37	2688.25	30	1.1	897.092	3	18.77		F33:304	1	1101	1130	Oxidation or Hydroxylation	P8:Oxidation or Hydroxylation:0.00;P12:Oxidation or Hydroxylation:11.06;P15:Oxidation or Hydroxylation:39.44
Sample 1	1	1	Collagen alpha-2(I) chain OS=Gallus gallus GN=COL1A2 PE=4 SV=1	tr|F1P0H9|F1P0H9_CHICK	R.VGPIGPAGNRGEP(+15.99)GNIGFP(+15.99)GPK.G	N	34.93	2119.08	22	1.4	1060.55	2	18.82		F33:306	4	476	497	Oxidation or Hydroxylation	P13:Oxidation or Hydroxylation:14.04;P19:Oxidation or Hydroxylation:0.00
Sample 1	2	5	Collagen alpha-2(I) chain (Fragments) OS=Gallus gallus GN=COL1A2 PE=1 SV=2	P02467|CO1A2_CHICK	R.VGPIGPAGNRGEP(+15.99)GNIGFP(+15.99)GPK.G	N	34.93	2119.08	22	1.4	1060.55	2	18.82		F33:306	4	475	496	Oxidation or Hydroxylation	P13:Oxidation or Hydroxylation:14.04;P19:Oxidation or Hydroxylation:0.00
Sample 1	3	4	Collagen alpha-1(I) chain OS=Gallus gallus GN=COL1A1 PE=1 SV=3	P02457|CO1A1_CHICK	R.GQAGVMGFPGP(+15.99)K.G	Y	41.53	1160.56	12	0.5	581.29	2	18.95		F33:310	1	564	575	Oxidation or Hydroxylation	P11:Oxidation or Hydroxylation:0.00
Sample 1	1	1	Collagen alpha-2(I) chain OS=Gallus gallus GN=COL1A2 PE=4 SV=1	tr|F1P0H9|F1P0H9_CHICK	K.GAAGLP(+15.99)GVAGAP(+15.99)GLPGPR(+15.99).G	N	38.48	1561.82	18	1.3	781.919	2	19.12	259000000	F33:316	2	309	326	Oxidation or Hydroxylation	P6:Oxidation or Hydroxylation:140.79;P12:Oxidation or Hydroxylation:34.94;R18:Oxidation or Hydroxylation:0.00
Sample 1	2	5	Collagen alpha-2(I) chain (Fragments) OS=Gallus gallus GN=COL1A2 PE=1 SV=2	P02467|CO1A2_CHICK	K.GAAGLP(+15.99)GVAGAP(+15.99)GLPGPR(+15.99).G	N	38.48	1561.82	18	1.3	781.919	2	19.12	259000000	F33:316	2	308	325	Oxidation or Hydroxylation	P6:Oxidation or Hydroxylation:140.79;P12:Oxidation or Hydroxylation:34.94;R18:Oxidation or Hydroxylation:0.00
Sample 1	3	4	Collagen alpha-1(I) chain OS=Gallus gallus GN=COL1A1 PE=1 SV=3	P02457|CO1A1_CHICK	R.GFSGLQGPP(+15.99)GPP(+15.99)GAP(+15.99)GEQGPSGASGPAGPR.G	Y	50.08	2688.25	30	2.6	1345.14	2	19.15		F33:317	6	1101	1130	Oxidation or Hydroxylation	P9:Oxidation or Hydroxylation:46.13;P12:Oxidation or Hydroxylation:48.12;P15:Oxidation or Hydroxylation:100.91
Sample 1	1	1	Collagen alpha-2(I) chain OS=Gallus gallus GN=COL1A2 PE=4 SV=1	tr|F1P0H9|F1P0H9_CHICK	K.GP(+15.99)KGQ(sub E)TGPTGAIGPIGASGPP(+15.99)GPVGAAGPAGPR.G	Y	23.36	2835.46	33	-8.7	946.153	3	19.33		F33:323	1	744	776	Oxidation or Hydroxylation; Mutation	P2:Oxidation or Hydroxylation:0.00;P21:Oxidation or Hydroxylation:8.69
Sample 1	1	1	Collagen alpha-2(I) chain OS=Gallus gallus GN=COL1A2 PE=4 SV=1	tr|F1P0H9|F1P0H9_CHICK	K.GPKGETGPTGAIGPIGASGPP(+15.99)GPVGAAGPAGPR.G	N	46.88	2820.45	33	1	941.159	3	19.58	54900000	F33:332	4	744	776	Oxidation or Hydroxylation	P21:Oxidation or Hydroxylation:81.34
Sample 1	2	5	Collagen alpha-2(I) chain (Fragments) OS=Gallus gallus GN=COL1A2 PE=1 SV=2	P02467|CO1A2_CHICK	K.GPKGETGPTGAIGPIGASGPP(+15.99)GPVGAAGPAGPR.G	N	46.88	2820.45	33	1	941.159	3	19.58	54900000	F33:332	4	743	775	Oxidation or Hydroxylation	P21:Oxidation or Hydroxylation:81.34
Sample 1	3	4	Collagen alpha-1(I) chain OS=Gallus gallus GN=COL1A1 PE=1 SV=3	P02457|CO1A1_CHICK	R.GFSGLQGPP(+15.99)GPPGAP(+15.99)GEQGPSGASGPAGPR.G	Y	50.4	2672.26	30	2	1337.14	2	19.61		F33:333	2	1101	1130	Oxidation or Hydroxylation	P9:Oxidation or Hydroxylation:51.59;P15:Oxidation or Hydroxylation:92.73
Sample 1	1	1	Collagen alpha-2(I) chain OS=Gallus gallus GN=COL1A2 PE=4 SV=1	tr|F1P0H9|F1P0H9_CHICK	K.GPR(sub K)GETGPTGAV(sub I)GPIGASGPP(+15.99)GPVGAAGPAGPR.G	Y	26.15	2834.44	33	-3.1	945.818	3	19.63		F33:334	1	744	776	Oxidation or Hydroxylation; Mutation	P21:Oxidation or Hydroxylation:14.02
Sample 1	1	1	Collagen alpha-2(I) chain OS=Gallus gallus GN=COL1A2 PE=4 SV=1	tr|F1P0H9|F1P0H9_CHICK	K.GETGPTGAIGPIGASGPP(+15.99)GPVGAAGPAGPR.G	N	38.19	2538.28	30	1.5	1270.15	2	21.56		F33:395	1	747	776	Oxidation or Hydroxylation	P18:Oxidation or Hydroxylation:17.01
Sample 1	2	5	Collagen alpha-2(I) chain (Fragments) OS=Gallus gallus GN=COL1A2 PE=1 SV=2	P02467|CO1A2_CHICK	K.GETGPTGAIGPIGASGPP(+15.99)GPVGAAGPAGPR.G	N	38.19	2538.28	30	1.5	1270.15	2	21.56		F33:395	1	746	775	Oxidation or Hydroxylation	P18:Oxidation or Hydroxylation:17.01
Sample 1	1	1	Collagen alpha-2(I) chain OS=Gallus gallus GN=COL1A2 PE=4 SV=1	tr|F1P0H9|F1P0H9_CHICK	K.GPKGETGPTGAIGPIGASGPP(+15.99)GPVGAAGPAGPRGDAGP(+15.99)PGMTGFPGAAGR(+15.99).V	N	45.57	4349.12	50	4.3	1088.29	4	21.67		F33:399	1	744	793	Oxidation or Hydroxylation	P21:Oxidation or Hydroxylation:106.58;P38:Oxidation or Hydroxylation:117.08;R50:Oxidation or Hydroxylation:14.42
Sample 1	2	5	Collagen alpha-2(I) chain (Fragments) OS=Gallus gallus GN=COL1A2 PE=1 SV=2	P02467|CO1A2_CHICK	K.GPKGETGPTGAIGPIGASGPP(+15.99)GPVGAAGPAGPRGDAGP(+15.99)PGMTGFPGAAGR(+15.99).V	N	45.57	4349.12	50	4.3	1088.29	4	21.67		F33:399	1	743	792	Oxidation or Hydroxylation	P21:Oxidation or Hydroxylation:106.58;P38:Oxidation or Hydroxylation:117.08;R50:Oxidation or Hydroxylation:14.42
Sample 1	1	1	Collagen alpha-2(I) chain OS=Gallus gallus GN=COL1A2 PE=4 SV=1	tr|F1P0H9|F1P0H9_CHICK	R.GDP(+15.99)GPVGPVGPAGAFGPR.G	N	50.68	1619.81	18	0.7	810.911	2	22.07		F33:412	4	978	995	Oxidation or Hydroxylation	P3:Oxidation or Hydroxylation:10.11
Sample 1	2	5	Collagen alpha-2(I) chain (Fragments) OS=Gallus gallus GN=COL1A2 PE=1 SV=2	P02467|CO1A2_CHICK	R.GDP(+15.99)GPVGPVGPAGAFGPR.G	N	50.68	1619.81	18	0.7	810.911	2	22.07		F33:412	4	977	994	Oxidation or Hydroxylation	P3:Oxidation or Hydroxylation:10.11
Sample 1	1	1	Collagen alpha-2(I) chain OS=Gallus gallus GN=COL1A2 PE=4 SV=1	tr|F1P0H9|F1P0H9_CHICK	R.GFP(+15.99)GTP(+15.99)GLPGFK(+15.99).G	Y	35.67	1221.6	12	0.4	611.809	2	22.09		F33:413	3	165	176	Oxidation or Hydroxylation	P3:Oxidation or Hydroxylation:17.01;P6:Oxidation or Hydroxylation:32.52;K12:Oxidation or Hydroxylation:0.00
Sample 1	1	1	Collagen alpha-2(I) chain OS=Gallus gallus GN=COL1A2 PE=4 SV=1	tr|F1P0H9|F1P0H9_CHICK	D.PGPVGPVGPAGAFGPR.G	N	36.42	1431.76	16	1.1	716.889	2	22.15		F33:415	3	980	995
Sample 1	2	5	Collagen alpha-2(I) chain (Fragments) OS=Gallus gallus GN=COL1A2 PE=1 SV=2	P02467|CO1A2_CHICK	D.PGPVGPVGPAGAFGPR.G	N	36.42	1431.76	16	1.1	716.889	2	22.15		F33:415	3	979	994
Sample 1	1	1	Collagen alpha-2(I) chain OS=Gallus gallus GN=COL1A2 PE=4 SV=1	tr|F1P0H9|F1P0H9_CHICK	R.GDPGPVGPVGPAGAFGPR.G	N	48.32	1603.81	18	1.4	802.914	2	22.36		F33:421	4	978	995
Sample 1	2	5	Collagen alpha-2(I) chain (Fragments) OS=Gallus gallus GN=COL1A2 PE=1 SV=2	P02467|CO1A2_CHICK	R.GDPGPVGPVGPAGAFGPR.G	N	48.32	1603.81	18	1.4	802.914	2	22.36		F33:421	4	977	994
Sample 1	1	1	Collagen alpha-2(I) chain OS=Gallus gallus GN=COL1A2 PE=4 SV=1	tr|F1P0H9|F1P0H9_CHICK	R.GFP(+15.99)GTP(+15.99)GLP(+15.99)GFK.G	Y	38.13	1221.6	12	0.7	611.809	2	22.39		F33:422	1	165	176	Oxidation or Hydroxylation	P3:Oxidation or Hydroxylation:27.96;P6:Oxidation or Hydroxylation:33.54;P9:Oxidation or Hydroxylation:0.00
Sample 1	1	1	Collagen alpha-2(I) chain OS=Gallus gallus GN=COL1A2 PE=4 SV=1	tr|F1P0H9|F1P0H9_CHICK	R.GLP(+15.99)GIAGATGEP(+15.99)GPLGVSGPPGAR(+15.99).G	N	44.27	2132.09	24	1.4	1067.05	2	22.66		F33:430	4	882	905	Oxidation or Hydroxylation	P3:Oxidation or Hydroxylation:192.57;P12:Oxidation or Hydroxylation:39.76;R24:Oxidation or Hydroxylation:0.00
Sample 1	2	5	Collagen alpha-2(I) chain (Fragments) OS=Gallus gallus GN=COL1A2 PE=1 SV=2	P02467|CO1A2_CHICK	R.GLP(+15.99)GIAGATGEP(+15.99)GPLGVSGPPGAR(+15.99).G	N	44.27	2132.09	24	1.4	1067.05	2	22.66		F33:430	4	881	904	Oxidation or Hydroxylation	P3:Oxidation or Hydroxylation:192.57;P12:Oxidation or Hydroxylation:39.76;R24:Oxidation or Hydroxylation:0.00
Sample 1	1	1	Collagen alpha-2(I) chain OS=Gallus gallus GN=COL1A2 PE=4 SV=1	tr|F1P0H9|F1P0H9_CHICK	D.P(+175.04)GPVGPVGPAGAFGPR.G	N	35.07	1606.8	16	9.5	804.417	2	22.77		F33:434	2	980	995	Naphthalene-2 3-dicarboxaldehyde	P1:Naphthalene-2 3-dicarboxaldehyde:1000.00
Sample 1	2	5	Collagen alpha-2(I) chain (Fragments) OS=Gallus gallus GN=COL1A2 PE=1 SV=2	P02467|CO1A2_CHICK	D.P(+175.04)GPVGPVGPAGAFGPR.G	N	35.07	1606.8	16	9.5	804.417	2	22.77		F33:434	2	979	994	Naphthalene-2 3-dicarboxaldehyde	P1:Naphthalene-2 3-dicarboxaldehyde:1000.00
Sample 1	1	1	Collagen alpha-2(I) chain OS=Gallus gallus GN=COL1A2 PE=4 SV=1	tr|F1P0H9|F1P0H9_CHICK	R.GLP(+15.99)GIAGATGEP(+15.99)GPLGVSGPP(+15.99)GAR.G	N	42.57	2132.09	24	1.3	1067.05	2	23.28		F33:448	2	882	905	Oxidation or Hydroxylation	P3:Oxidation or Hydroxylation:156.90;P12:Oxidation or Hydroxylation:20.41;P21:Oxidation or Hydroxylation:0.00
Sample 1	2	5	Collagen alpha-2(I) chain (Fragments) OS=Gallus gallus GN=COL1A2 PE=1 SV=2	P02467|CO1A2_CHICK	R.GLP(+15.99)GIAGATGEP(+15.99)GPLGVSGPP(+15.99)GAR.G	N	42.57	2132.09	24	1.3	1067.05	2	23.28		F33:448	2	881	904	Oxidation or Hydroxylation	P3:Oxidation or Hydroxylation:156.90;P12:Oxidation or Hydroxylation:20.41;P21:Oxidation or Hydroxylation:0.00
Sample 1	1	1	Collagen alpha-2(I) chain OS=Gallus gallus GN=COL1A2 PE=4 SV=1	tr|F1P0H9|F1P0H9_CHICK	K.GETGPTGAIGPIGASGP(+15.99)PGPVGAAGPAGPRGDAGPPGM(+15.99)TGFP(+15.99)GAAGR.V	N	51.38	4066.96	47	-3.8	1356.65	3	23.34		F33:450	1	747	793	Oxidation or Hydroxylation; Oxidation (M)	P17:Oxidation or Hydroxylation:78.19;M38:Oxidation (M):1000.00;P42:Oxidation or Hydroxylation:12.28
Sample 1	2	5	Collagen alpha-2(I) chain (Fragments) OS=Gallus gallus GN=COL1A2 PE=1 SV=2	P02467|CO1A2_CHICK	K.GETGPTGAIGPIGASGP(+15.99)PGPVGAAGPAGPRGDAGPPGM(+15.99)TGFP(+15.99)GAAGR.V	N	51.38	4066.96	47	-3.8	1356.65	3	23.34		F33:450	1	746	792	Oxidation or Hydroxylation; Oxidation (M)	P17:Oxidation or Hydroxylation:78.19;M38:Oxidation (M):1000.00;P42:Oxidation or Hydroxylation:12.28
Sample 1	1	1	Collagen alpha-2(I) chain OS=Gallus gallus GN=COL1A2 PE=4 SV=1	tr|F1P0H9|F1P0H9_CHICK	R.GLP(+15.99)GIAGATGEPGPLGVSGP(+15.99)PGAR.G	N	37.84	2116.09	24	2	1059.06	2	23.67		F33:457	1	882	905	Oxidation or Hydroxylation	P3:Oxidation or Hydroxylation:106.84;P20:Oxidation or Hydroxylation:0.00
Sample 1	2	5	Collagen alpha-2(I) chain (Fragments) OS=Gallus gallus GN=COL1A2 PE=1 SV=2	P02467|CO1A2_CHICK	R.GLP(+15.99)GIAGATGEPGPLGVSGP(+15.99)PGAR.G	N	37.84	2116.09	24	2	1059.06	2	23.67		F33:457	1	881	904	Oxidation or Hydroxylation	P3:Oxidation or Hydroxylation:106.84;P20:Oxidation or Hydroxylation:0.00
Sample 1	1	1	Collagen alpha-2(I) chain OS=Gallus gallus GN=COL1A2 PE=4 SV=1	tr|F1P0H9|F1P0H9_CHICK	R.GLP(+15.99)GIAGATGEPGPLGVSGPPGAR(+15.99).G	N	38.37	2116.09	24	0.5	706.371	3	23.7		F33:458	1	882	905	Oxidation or Hydroxylation	P3:Oxidation or Hydroxylation:100.79;R24:Oxidation or Hydroxylation:7.77
Sample 1	2	5	Collagen alpha-2(I) chain (Fragments) OS=Gallus gallus GN=COL1A2 PE=1 SV=2	P02467|CO1A2_CHICK	R.GLP(+15.99)GIAGATGEPGPLGVSGPPGAR(+15.99).G	N	38.37	2116.09	24	0.5	706.371	3	23.7		F33:458	1	881	904	Oxidation or Hydroxylation	P3:Oxidation or Hydroxylation:100.79;R24:Oxidation or Hydroxylation:7.77
Sample 1	5	6	Apolipoprotein A-I OS=Gallus gallus GN=APOA1 PE=1 SV=2	P08250|APOA1_CHICK	K.IRPFLDQFSAK.W	Y	34.24	1320.72	11	1.2	661.368	2	23.72		F33:459	1	120	130
Sample 1	5	6	Apolipoprotein A-I OS=Gallus gallus GN=APOA1 PE=1 SV=2	P08250|APOA1_CHICK	K.MTPLVQEFR.E	Y	32.11	1119.57	9	0.3	560.795	2	23.93		F33:464	1	230	238
Sample 1	1	1	Collagen alpha-2(I) chain OS=Gallus gallus GN=COL1A2 PE=4 SV=1	tr|F1P0H9|F1P0H9_CHICK	L.G(+163.05)GNFAAQYDPSKAADFGPGPMGLMGPR.G	N	19.12	2871.29	27	-1.6	718.829	4	24.24		F33:471	1	72	98	Phenethyl isothiocyanate	G1:Phenethyl isothiocyanate:0.00
Sample 1	2	5	Collagen alpha-2(I) chain (Fragments) OS=Gallus gallus GN=COL1A2 PE=1 SV=2	P02467|CO1A2_CHICK	L.G(+163.05)GNFAAQYDPSKAADFGPGPMGLMGPR.G	N	19.12	2871.29	27	-1.6	718.829	4	24.24		F33:471	1	72	98	Phenethyl isothiocyanate	G1:Phenethyl isothiocyanate:0.00
Sample 1	3	4	Collagen alpha-1(I) chain OS=Gallus gallus GN=COL1A1 PE=1 SV=3	P02457|CO1A1_CHICK	P.Q(-17.03)MSYGYDEK(+15.99)SAGVAVPGPMGPAGPR.G	Y	19.52	2520.14	25	1.8	1261.08	2	24.51		F33:478	1	152	176	Pyro-glu from Q; Oxidation or Hydroxylation	Q1:Pyro-glu from Q:1000.00;K9:Oxidation or Hydroxylation:0.00
Sample 1	8	10	Decorin OS=Gallus gallus GN=DCN PE=1 SV=1	P28675|PGS2_CHICK	K.IDAEGLSGLTNLAK.L	Y	42.23	1400.75	14	1.1	701.384	2	26.55		F33:523	1	234	247
Sample 1	8	11	Decorin OS=Gallus gallus GN=DCN PE=4 SV=2	tr|E1BRE9|E1BRE9_CHICK	K.IDAEGLSGLTNLAK.L	Y	42.23	1400.75	14	1.1	701.384	2	26.55		F33:523	1	234	247
Sample 1	1	1	Collagen alpha-2(I) chain OS=Gallus gallus GN=COL1A2 PE=4 SV=1	tr|F1P0H9|F1P0H9_CHICK	K.AADFGPGPMGLMGPR.G	N	48.82	1472.69	15	1.3	737.354	2	26.83		F33:529	3	84	98
Sample 1	2	5	Collagen alpha-2(I) chain (Fragments) OS=Gallus gallus GN=COL1A2 PE=1 SV=2	P02467|CO1A2_CHICK	K.AADFGPGPMGLMGPR.G	N	48.82	1472.69	15	1.3	737.354	2	26.83		F33:529	3	84	98
Sample 1	1	1	Collagen alpha-2(I) chain OS=Gallus gallus GN=COL1A2 PE=4 SV=1	tr|F1P0H9|F1P0H9_CHICK	K.AADFGPGP(+15.99)MGLM(+15.99)GPR.G	N	39.82	1504.68	15	1.3	753.348	2	26.85		F33:530	1	84	98	Oxidation or Hydroxylation; Oxidation (M)	P8:Oxidation or Hydroxylation:33.18;M12:Oxidation (M):40.63
Sample 1	2	5	Collagen alpha-2(I) chain (Fragments) OS=Gallus gallus GN=COL1A2 PE=1 SV=2	P02467|CO1A2_CHICK	K.AADFGPGP(+15.99)MGLM(+15.99)GPR.G	N	39.82	1504.68	15	1.3	753.348	2	26.85		F33:530	1	84	98	Oxidation or Hydroxylation; Oxidation (M)	P8:Oxidation or Hydroxylation:33.18;M12:Oxidation (M):40.63
Sample 1	1	1	Collagen alpha-2(I) chain OS=Gallus gallus GN=COL1A2 PE=4 SV=1	tr|F1P0H9|F1P0H9_CHICK	A.ADFGPGPMGLMGPR.G	N	41.32	1401.65	14	0.9	701.835	2	26.91		F33:532	1	85	98
Sample 1	2	5	Collagen alpha-2(I) chain (Fragments) OS=Gallus gallus GN=COL1A2 PE=1 SV=2	P02467|CO1A2_CHICK	A.ADFGPGPMGLMGPR.G	N	41.32	1401.65	14	0.9	701.835	2	26.91		F33:532	1	85	98
Sample 1	1	1	Collagen alpha-2(I) chain OS=Gallus gallus GN=COL1A2 PE=4 SV=1	tr|F1P0H9|F1P0H9_CHICK	K.AADFGPGP(+13.98)MGLMGPR.G	N	26.76	1486.67	15	2.4	744.344	2	26.97		F33:534	1	84	98	Proline oxidation to pyroglutamic acid	P8:Proline oxidation to pyroglutamic acid:0.00
Sample 1	2	5	Collagen alpha-2(I) chain (Fragments) OS=Gallus gallus GN=COL1A2 PE=1 SV=2	P02467|CO1A2_CHICK	K.AADFGPGP(+13.98)MGLMGPR.G	N	26.76	1486.67	15	2.4	744.344	2	26.97		F33:534	1	84	98	Proline oxidation to pyroglutamic acid	P8:Proline oxidation to pyroglutamic acid:0.00
Sample 1	1	1	Collagen alpha-2(I) chain OS=Gallus gallus GN=COL1A2 PE=4 SV=1	tr|F1P0H9|F1P0H9_CHICK	A.DFGPGPMGLMGPR.G	N	38.84	1330.62	13	1	666.316	2	27.88		F33:557	2	86	98
Sample 1	2	5	Collagen alpha-2(I) chain (Fragments) OS=Gallus gallus GN=COL1A2 PE=1 SV=2	P02467|CO1A2_CHICK	A.DFGPGPMGLMGPR.G	N	38.84	1330.62	13	1	666.316	2	27.88		F33:557	2	86	98
Sample 1	1	1	Collagen alpha-2(I) chain OS=Gallus gallus GN=COL1A2 PE=4 SV=1	tr|F1P0H9|F1P0H9_CHICK	A.DFGPGP(+15.99)MGLM(+15.99)GPR.G	N	31.24	1362.61	13	1.1	682.311	2	28.1		F33:562	1	86	98	Oxidation or Hydroxylation; Oxidation (M)	P6:Oxidation or Hydroxylation:17.01;M10:Oxidation (M):56.34
Sample 1	2	5	Collagen alpha-2(I) chain (Fragments) OS=Gallus gallus GN=COL1A2 PE=1 SV=2	P02467|CO1A2_CHICK	A.DFGPGP(+15.99)MGLM(+15.99)GPR.G	N	31.24	1362.61	13	1.1	682.311	2	28.1		F33:562	1	86	98	Oxidation or Hydroxylation; Oxidation (M)	P6:Oxidation or Hydroxylation:17.01;M10:Oxidation (M):56.34
Sample 1	1	1	Collagen alpha-2(I) chain OS=Gallus gallus GN=COL1A2 PE=4 SV=1	tr|F1P0H9|F1P0H9_CHICK	A.Q(-17.03)YDPSK(+15.99)AADFGPGPMGLMGPR.G	N	34.2	2189.99	21	2.3	1096	2	28.93		F33:574	2	78	98	Pyro-glu from Q; Oxidation or Hydroxylation	Q1:Pyro-glu from Q:1000.00;K6:Oxidation or Hydroxylation:18.53
Sample 1	2	5	Collagen alpha-2(I) chain (Fragments) OS=Gallus gallus GN=COL1A2 PE=1 SV=2	P02467|CO1A2_CHICK	A.Q(-17.03)YDPSK(+15.99)AADFGPGPMGLMGPR.G	N	34.2	2189.99	21	2.3	1096	2	28.93		F33:574	2	78	98	Pyro-glu from Q; Oxidation or Hydroxylation	Q1:Pyro-glu from Q:1000.00;K6:Oxidation or Hydroxylation:18.53
Sample 1	1	1	Collagen alpha-2(I) chain OS=Gallus gallus GN=COL1A2 PE=4 SV=1	tr|F1P0H9|F1P0H9_CHICK	A.Q(-17.03)Y(+15.99)DPSKAADFGPGPMGLMGPR.G	N	33.41	2189.99	21	1.6	731.004	3	29.03		F33:577	2	78	98	Pyro-glu from Q; Oxidation or Hydroxylation	Q1:Pyro-glu from Q:1000.00;Y2:Oxidation or Hydroxylation:0.00
Sample 1	1	1	Collagen alpha-2(I) chain OS=Gallus gallus GN=COL1A2 PE=4 SV=1	tr|F1P0H9|F1P0H9_CHICK	R.DGED(+15.99)GP(+15.99)P(+15.99)GPPGPPGPPGLGGNFAAQYDPSKAADFGPGPMGLMGPR.G	N	21.01	4346.96	45	9.3	1087.76	4	29.41		F33:584	1	54	98	Oxidation or Hydroxylation	D4:Oxidation or Hydroxylation:0.00;P6:Oxidation or Hydroxylation:0.00;P7:Oxidation or Hydroxylation:0.00
Sample 1	2	5	Collagen alpha-2(I) chain (Fragments) OS=Gallus gallus GN=COL1A2 PE=1 SV=2	P02467|CO1A2_CHICK	R.DGED(+15.99)GP(+15.99)P(+15.99)GPPGPPGPPGLGGNFAAQYDPSKAADFGPGPMGLMGPR.G	N	21.01	4346.96	45	9.3	1087.76	4	29.41		F33:584	1	54	98	Oxidation or Hydroxylation	D4:Oxidation or Hydroxylation:0.00;P6:Oxidation or Hydroxylation:0.00;P7:Oxidation or Hydroxylation:0.00
Sample 1	5	6	Apolipoprotein A-I OS=Gallus gallus GN=APOA1 PE=1 SV=2	P08250|APOA1_CHICK	R.LISFLDELQK.S	Y	33.37	1204.67	10	0.8	603.343	2	30.45		F33:601	1	252	261
Sample 1	6	20	Vitronectin OS=Gallus gallus PE=2 SV=1	tr|O12945|O12945_CHICK	K.LISDVWGIEGPIDAAFTR.I	Y	30.78	1959.01	18	1.5	980.514	2	34.9		F33:664	3	193	210
Sample 1	3	4	Collagen alpha-1(I) chain OS=Gallus gallus GN=COL1A1 PE=1 SV=3	P02457|CO1A1_CHICK	R.GLTGPIGPP(+15.99)GPAGAP(+15.99)GDKGEAGPP(+15.99)GPAGPTGAR.G	Y	49.17	2878.42	33	-0.3	960.481	3	38.63		F33:700	12	753	785	Oxidation or Hydroxylation	P9:Oxidation or Hydroxylation:22.85;P15:Oxidation or Hydroxylation:33.81;P24:Oxidation or Hydroxylation:22.85
Sample 1	3	4	Collagen alpha-1(I) chain OS=Gallus gallus GN=COL1A1 PE=1 SV=3	P02457|CO1A1_CHICK	R.GLTGPIGPP(+15.99)GPAGAPGD(+15.99)KGEAGPP(+15.99)GPAGPTGAR.G	Y	39.89	2878.42	33	0.9	960.482	3	40.15		F33:711	6	753	785	Oxidation or Hydroxylation	P9:Oxidation or Hydroxylation:17.01;D17:Oxidation or Hydroxylation:28.13;P24:Oxidation or Hydroxylation:17.01
Sample 1	3	4	Collagen alpha-1(I) chain OS=Gallus gallus GN=COL1A1 PE=1 SV=3	P02457|CO1A1_CHICK	R.GFSGLQGPPGP(+31.99)PGAP(+15.99)GEQGPSGASGPAGPR.G	Y	28.54	2688.25	30	0.9	897.092	3	40.92		F33:716	1	1101	1130	Dihydroxy; Oxidation or Hydroxylation	P11:Dihydroxy:0.00;P15:Oxidation or Hydroxylation:20.76
Sample 1	1	1	Collagen alpha-2(I) chain OS=Gallus gallus GN=COL1A2 PE=4 SV=1	tr|F1P0H9|F1P0H9_CHICK	R.GLP(+15.99)GIAGATGEPGP(+15.99)LGVSGPP(+15.99)GAR.G	N	25.27	2132.09	24	2.3	1067.05	2	41.79		F33:723	1	882	905	Oxidation or Hydroxylation	P3:Oxidation or Hydroxylation:60.15;P14:Oxidation or Hydroxylation:14.04;P21:Oxidation or Hydroxylation:0.00
Sample 1	2	5	Collagen alpha-2(I) chain (Fragments) OS=Gallus gallus GN=COL1A2 PE=1 SV=2	P02467|CO1A2_CHICK	R.GLP(+15.99)GIAGATGEPGP(+15.99)LGVSGPP(+15.99)GAR.G	N	25.27	2132.09	24	2.3	1067.05	2	41.79		F33:723	1	881	904	Oxidation or Hydroxylation	P3:Oxidation or Hydroxylation:60.15;P14:Oxidation or Hydroxylation:14.04;P21:Oxidation or Hydroxylation:0.00
Sample 1	1	1	Collagen alpha-2(I) chain OS=Gallus gallus GN=COL1A2 PE=4 SV=1	tr|F1P0H9|F1P0H9_CHICK	R.GLP(+15.99)GIAGATGEPGP(+15.99)LGVSGPPGAR(+15.99).G	N	24.97	2132.09	24	0.8	1067.05	2	48.44		F33:785	2	882	905	Oxidation or Hydroxylation	P3:Oxidation or Hydroxylation:74.73;P14:Oxidation or Hydroxylation:0.00;R24:Oxidation or Hydroxylation:0.00
Sample 1	2	5	Collagen alpha-2(I) chain (Fragments) OS=Gallus gallus GN=COL1A2 PE=1 SV=2	P02467|CO1A2_CHICK	R.GLP(+15.99)GIAGATGEPGP(+15.99)LGVSGPPGAR(+15.99).G	N	24.97	2132.09	24	0.8	1067.05	2	48.44		F33:785	2	881	904	Oxidation or Hydroxylation	P3:Oxidation or Hydroxylation:74.73;P14:Oxidation or Hydroxylation:0.00;R24:Oxidation or Hydroxylation:0.00
Sample 2	3	4	Collagen alpha-1(I) chain OS=Gallus gallus GN=COL1A1 PE=1 SV=3	P02457|CO1A1_CHICK	R.GAP(+15.99)GPP(+15.99)GAVGAAGKDGEAGAQGPPGPTGPAGER.G	Y	37.02	2839.35	33	0.4	947.457	3	14.12		F34:146	2	588	620	Oxidation or Hydroxylation	P3:Oxidation or Hydroxylation:14.04;P6:Oxidation or Hydroxylation:17.01
Sample 2	1	1	Collagen alpha-2(I) chain OS=Gallus gallus GN=COL1A2 PE=4 SV=1	tr|F1P0H9|F1P0H9_CHICK	R.GASGPVGAKGPN(+.98)GDAGR(+15.99)PGEP(+15.99)GLMGPR.G	N	38.18	2491.19	27	0.9	623.805	4	14.64		F34:162	1	423	449	Deamidation (NQ); Oxidation or Hydroxylation	N12:Deamidation (NQ):1000.00;R17:Oxidation or Hydroxylation:0.00;P21:Oxidation or Hydroxylation:10.03
Sample 2	2	5	Collagen alpha-2(I) chain (Fragments) OS=Gallus gallus GN=COL1A2 PE=1 SV=2	P02467|CO1A2_CHICK	R.GASGPVGAKGPN(+.98)GDAGR(+15.99)PGEP(+15.99)GLMGPR.X	N	38.18	2491.19	27	0.9	623.805	4	14.64		F34:162	1	422	448	Deamidation (NQ); Oxidation or Hydroxylation	N12:Deamidation (NQ):1000.00;R17:Oxidation or Hydroxylation:0.00;P21:Oxidation or Hydroxylation:10.03
Sample 2	1	1	Collagen alpha-2(I) chain OS=Gallus gallus GN=COL1A2 PE=4 SV=1	tr|F1P0H9|F1P0H9_CHICK	R.GLHGEFGVP(+15.99)GPAGPRGER.G	N	36.71	1804.9	18	0.8	602.64	3	15.22		F34:181	3	573	590	Oxidation or Hydroxylation	P9:Oxidation or Hydroxylation:0.00
Sample 2	2	5	Collagen alpha-2(I) chain (Fragments) OS=Gallus gallus GN=COL1A2 PE=1 SV=2	P02467|CO1A2_CHICK	R.GLHGEFGVP(+15.99)GPAGPRGER.G	N	36.71	1804.9	18	0.8	602.64	3	15.22		F34:181	3	572	589	Oxidation or Hydroxylation	P9:Oxidation or Hydroxylation:0.00
Sample 2	3	4	Collagen alpha-1(I) chain OS=Gallus gallus GN=COL1A1 PE=1 SV=3	P02457|CO1A1_CHICK	R.GFP(+15.99)GADGIAGPKGP(+15.99)PGER.G	Y	22.14	1710.83	18	1.3	856.425	2	16.4		F34:220	1	483	500	Oxidation or Hydroxylation	P3:Oxidation or Hydroxylation:17.01;P14:Oxidation or Hydroxylation:0.00
Sample 2	1	1	Collagen alpha-2(I) chain OS=Gallus gallus GN=COL1A2 PE=4 SV=1	tr|F1P0H9|F1P0H9_CHICK	R.GPP(+15.99)GPSGPPGKDGRN(+.98)GLP(+15.99)GPIGPAGVR.G	N	21.12	2493.27	27	0.7	624.326	4	16.43		F34:221	1	1053	1079	Oxidation or Hydroxylation; Deamidation (NQ)	P3:Oxidation or Hydroxylation:17.01;N15:Deamidation (NQ):1000.00;P18:Oxidation or Hydroxylation:6.38
Sample 2	2	5	Collagen alpha-2(I) chain (Fragments) OS=Gallus gallus GN=COL1A2 PE=1 SV=2	P02467|CO1A2_CHICK	R.GPP(+15.99)GPSGPPGKDGRN(+.98)GLP(+15.99)GPIGPAGVR.G	N	21.12	2493.27	27	0.7	624.326	4	16.43		F34:221	1	1052	1078	Oxidation or Hydroxylation; Deamidation (NQ)	P3:Oxidation or Hydroxylation:17.01;N15:Deamidation (NQ):1000.00;P18:Oxidation or Hydroxylation:6.38
Sample 2	1	1	Collagen alpha-2(I) chain OS=Gallus gallus GN=COL1A2 PE=4 SV=1	tr|F1P0H9|F1P0H9_CHICK	R.GLP(+31.99)GAIGAPGPAGGAGDRGEGGPAGPAGPAGAR.G	N	30.28	2724.33	33	1.6	1363.18	2	16.48		F34:223	1	675	707	Dihydroxy	P3:Dihydroxy:0.00
Sample 2	2	5	Collagen alpha-2(I) chain (Fragments) OS=Gallus gallus GN=COL1A2 PE=1 SV=2	P02467|CO1A2_CHICK	R.GLP(+31.99)GAIGAPGPAGGAGDRGEGGPAGPAGPAGAR.G	N	30.28	2724.33	33	1.6	1363.18	2	16.48		F34:223	1	674	706	Dihydroxy	P3:Dihydroxy:0.00
Sample 2	1	1	Collagen alpha-2(I) chain OS=Gallus gallus GN=COL1A2 PE=4 SV=1	tr|F1P0H9|F1P0H9_CHICK	R.GPPGPSGPPGKDGRN(+.98)GLP(+15.99)GPIGPAGVR.G	N	36.49	2477.28	27	1	620.327	4	17		F34:240	1	1053	1079	Deamidation (NQ); Oxidation or Hydroxylation	N15:Deamidation (NQ):1000.00;P18:Oxidation or Hydroxylation:14.04
Sample 2	2	5	Collagen alpha-2(I) chain (Fragments) OS=Gallus gallus GN=COL1A2 PE=1 SV=2	P02467|CO1A2_CHICK	R.GPPGPSGPPGKDGRN(+.98)GLP(+15.99)GPIGPAGVR.G	N	36.49	2477.28	27	1	620.327	4	17		F34:240	1	1052	1078	Deamidation (NQ); Oxidation or Hydroxylation	N15:Deamidation (NQ):1000.00;P18:Oxidation or Hydroxylation:14.04
Sample 2	3	4	Collagen alpha-1(I) chain OS=Gallus gallus GN=COL1A1 PE=1 SV=3	P02457|CO1A1_CHICK	R.GFP(+15.99)GADGIAGPK.G	Y	36.32	1101.55	12	0.6	551.78	2	17.77		F34:266	1	483	494	Oxidation or Hydroxylation	P3:Oxidation or Hydroxylation:11.06
Sample 2	3	4	Collagen alpha-1(I) chain OS=Gallus gallus GN=COL1A1 PE=1 SV=3	P02457|CO1A1_CHICK	R.GPP(+15.99)GPMGPP(+15.99)GLAGPPGEAGR(+15.99).E	Y	28.4	1815.86	20	1.7	908.938	2	17.84		F34:268	1	984	1003	Oxidation or Hydroxylation	P3:Oxidation or Hydroxylation:17.01;P9:Oxidation or Hydroxylation:17.01;R20:Oxidation or Hydroxylation:0.00
Sample 2	1	1	Collagen alpha-2(I) chain OS=Gallus gallus GN=COL1A2 PE=4 SV=1	tr|F1P0H9|F1P0H9_CHICK	K.GETGPAGPP(+15.99)GFQGLP(+15.99)GPSGPAGEAGKP(+15.99)GER.G	N	48.92	2776.31	30	1.6	926.444	3	18.43		F34:288	2	543	572	Oxidation or Hydroxylation	P9:Oxidation or Hydroxylation:64.16;P15:Oxidation or Hydroxylation:33.54;P27:Oxidation or Hydroxylation:27.25
Sample 2	2	5	Collagen alpha-2(I) chain (Fragments) OS=Gallus gallus GN=COL1A2 PE=1 SV=2	P02467|CO1A2_CHICK	K.GETGPAGPP(+15.99)GFQGLP(+15.99)GPSGPAGEAGKP(+15.99)GER.G	N	48.92	2776.31	30	1.6	926.444	3	18.43		F34:288	2	542	571	Oxidation or Hydroxylation	P9:Oxidation or Hydroxylation:64.16;P15:Oxidation or Hydroxylation:33.54;P27:Oxidation or Hydroxylation:27.25
Sample 2	3	4	Collagen alpha-1(I) chain OS=Gallus gallus GN=COL1A1 PE=1 SV=3	P02457|CO1A1_CHICK	R.GFSGLQGPPGP(+15.99)P(+15.99)GAP(+15.99)GEQGPSGASGPAGPR.G	Y	26.44	2688.25	30	1.1	897.092	3	19.25		F34:315	1	1101	1130	Oxidation or Hydroxylation	P11:Oxidation or Hydroxylation:0.00;P12:Oxidation or Hydroxylation:3.64;P15:Oxidation or Hydroxylation:22.09
Sample 2	3	4	Collagen alpha-1(I) chain OS=Gallus gallus GN=COL1A1 PE=1 SV=3	P02457|CO1A1_CHICK	R.GQAGVMGFP(+15.99)GPK.G	Y	42.99	1160.56	12	0.7	581.29	2	19.3	33400000	F34:317	2	564	575	Oxidation or Hydroxylation	P9:Oxidation or Hydroxylation:7.32
Sample 2	1	1	Collagen alpha-2(I) chain OS=Gallus gallus GN=COL1A2 PE=4 SV=1	tr|F1P0H9|F1P0H9_CHICK	K.GAAGLP(+15.99)GVAGAP(+15.99)GLPGP(+15.99)R.G	N	35.39	1561.82	18	1.4	781.919	2	19.39	222000000	F34:320	3	309	326	Oxidation or Hydroxylation	P6:Oxidation or Hydroxylation:142.42;P12:Oxidation or Hydroxylation:38.16;P17:Oxidation or Hydroxylation:0.00
Sample 2	2	5	Collagen alpha-2(I) chain (Fragments) OS=Gallus gallus GN=COL1A2 PE=1 SV=2	P02467|CO1A2_CHICK	K.GAAGLP(+15.99)GVAGAP(+15.99)GLPGP(+15.99)R.G	N	35.39	1561.82	18	1.4	781.919	2	19.39	222000000	F34:320	3	308	325	Oxidation or Hydroxylation	P6:Oxidation or Hydroxylation:142.42;P12:Oxidation or Hydroxylation:38.16;P17:Oxidation or Hydroxylation:0.00
Sample 2	3	4	Collagen alpha-1(I) chain OS=Gallus gallus GN=COL1A1 PE=1 SV=3	P02457|CO1A1_CHICK	R.GLP(+15.99)GTAGLPGM(+15.99)K.G	Y	30.74	1129.58	12	1.1	565.798	2	19.41		F34:321	1	243	254	Oxidation or Hydroxylation; Oxidation (M)	P3:Oxidation or Hydroxylation:95.35;M11:Oxidation (M):1000.00
Sample 2	1	1	Collagen alpha-2(I) chain OS=Gallus gallus GN=COL1A2 PE=4 SV=1	tr|F1P0H9|F1P0H9_CHICK	K.GP(+15.99)KGETGPTGAIGPIGASGPP(+15.99)GPVGAAGPAGPR.G	N	47.99	2836.45	33	1.5	946.491	3	19.56		F34:325	1	744	776	Oxidation or Hydroxylation	P2:Oxidation or Hydroxylation:0.00;P21:Oxidation or Hydroxylation:104.64
Sample 2	2	5	Collagen alpha-2(I) chain (Fragments) OS=Gallus gallus GN=COL1A2 PE=1 SV=2	P02467|CO1A2_CHICK	K.GP(+15.99)KGETGPTGAIGPIGASGPP(+15.99)GPVGAAGPAGPR.G	N	47.99	2836.45	33	1.5	946.491	3	19.56		F34:325	1	743	775	Oxidation or Hydroxylation	P2:Oxidation or Hydroxylation:0.00;P21:Oxidation or Hydroxylation:104.64
Sample 2	3	4	Collagen alpha-1(I) chain OS=Gallus gallus GN=COL1A1 PE=1 SV=3	P02457|CO1A1_CHICK	R.GQAGVMGFPGPK(+15.99).G	Y	42.59	1160.56	12	0.7	581.29	2	19.58	33400000	F34:326	1	564	575	Oxidation or Hydroxylation	K12:Oxidation or Hydroxylation:0.00
Sample 2	3	4	Collagen alpha-1(I) chain OS=Gallus gallus GN=COL1A1 PE=1 SV=3	P02457|CO1A1_CHICK	R.GFP(+15.99)GLPGP(+15.99)SGEPGK.Q	Y	24.69	1327.64	14	1	664.828	2	19.72	22200000	F34:331	1	960	973	Oxidation or Hydroxylation	P3:Oxidation or Hydroxylation:17.01;P8:Oxidation or Hydroxylation:0.00
Sample 2	1	1	Collagen alpha-2(I) chain OS=Gallus gallus GN=COL1A2 PE=4 SV=1	tr|F1P0H9|F1P0H9_CHICK	K.GPK(+15.99)GETGPTGAIGPIGASGPP(+15.99)GPVGAAGPAGPR.G	N	42.14	2836.45	33	1.1	946.49	3	19.83		F34:335	1	744	776	Oxidation or Hydroxylation	K3:Oxidation or Hydroxylation:0.00;P21:Oxidation or Hydroxylation:56.41
Sample 2	2	5	Collagen alpha-2(I) chain (Fragments) OS=Gallus gallus GN=COL1A2 PE=1 SV=2	P02467|CO1A2_CHICK	K.GPK(+15.99)GETGPTGAIGPIGASGPP(+15.99)GPVGAAGPAGPR.G	N	42.14	2836.45	33	1.1	946.49	3	19.83		F34:335	1	743	775	Oxidation or Hydroxylation	K3:Oxidation or Hydroxylation:0.00;P21:Oxidation or Hydroxylation:56.41
Sample 2	1	1	Collagen alpha-2(I) chain OS=Gallus gallus GN=COL1A2 PE=4 SV=1	tr|F1P0H9|F1P0H9_CHICK	R.VGPIGPAGN(+.98)RGEP(+15.99)GNIGFPGP(+15.99)K.G	N	30.59	2120.06	22	1.1	707.696	3	19.86	37500000	F34:336	1	476	497	Deamidation (NQ); Oxidation or Hydroxylation	N9:Deamidation (NQ):16.36;P13:Oxidation or Hydroxylation:0.00;P21:Oxidation or Hydroxylation:0.00
Sample 2	2	5	Collagen alpha-2(I) chain (Fragments) OS=Gallus gallus GN=COL1A2 PE=1 SV=2	P02467|CO1A2_CHICK	R.VGPIGPAGN(+.98)RGEP(+15.99)GNIGFPGP(+15.99)K.G	N	30.59	2120.06	22	1.1	707.696	3	19.86	37500000	F34:336	1	475	496	Deamidation (NQ); Oxidation or Hydroxylation	N9:Deamidation (NQ):16.36;P13:Oxidation or Hydroxylation:0.00;P21:Oxidation or Hydroxylation:0.00
Sample 2	1	1	Collagen alpha-2(I) chain OS=Gallus gallus GN=COL1A2 PE=4 SV=1	tr|F1P0H9|F1P0H9_CHICK	R.N(+.98)GLP(+15.99)GPIGPAGVR.G	N	31.6	1220.65	13	0.5	611.333	2	20.13		F34:345	1	1067	1079	Deamidation (NQ); Oxidation or Hydroxylation	N1:Deamidation (NQ):1000.00;P4:Oxidation or Hydroxylation:55.92
Sample 2	2	5	Collagen alpha-2(I) chain (Fragments) OS=Gallus gallus GN=COL1A2 PE=1 SV=2	P02467|CO1A2_CHICK	R.N(+.98)GLP(+15.99)GPIGPAGVR.G	N	31.6	1220.65	13	0.5	611.333	2	20.13		F34:345	1	1066	1078	Deamidation (NQ); Oxidation or Hydroxylation	N1:Deamidation (NQ):1000.00;P4:Oxidation or Hydroxylation:55.92
Sample 2	1	1	Collagen alpha-2(I) chain OS=Gallus gallus GN=COL1A2 PE=4 SV=1	tr|F1P0H9|F1P0H9_CHICK	K.GAAGLP(+15.99)GVAGAP(+15.99)GLP(+15.99)GPR.G	N	23.92	1561.82	18	1.4	781.919	2	20.26	222000000	F34:349	1	309	326	Oxidation or Hydroxylation	P6:Oxidation or Hydroxylation:60.24;P12:Oxidation or Hydroxylation:17.32;P15:Oxidation or Hydroxylation:0.00
Sample 2	2	5	Collagen alpha-2(I) chain (Fragments) OS=Gallus gallus GN=COL1A2 PE=1 SV=2	P02467|CO1A2_CHICK	K.GAAGLP(+15.99)GVAGAP(+15.99)GLP(+15.99)GPR.G	N	23.92	1561.82	18	1.4	781.919	2	20.26	222000000	F34:349	1	308	325	Oxidation or Hydroxylation	P6:Oxidation or Hydroxylation:60.24;P12:Oxidation or Hydroxylation:17.32;P15:Oxidation or Hydroxylation:0.00
Sample 2	1	1	Collagen alpha-2(I) chain OS=Gallus gallus GN=COL1A2 PE=4 SV=1	tr|F1P0H9|F1P0H9_CHICK	R.GSDGSAGPTGPAGPIGAAGPP(+15.99)GFP(+15.99)GAP(+15.99)GAK.G	Y	31.93	2520.19	30	2.7	1261.1	2	21.2		F34:376	1	234	263	Oxidation or Hydroxylation	P21:Oxidation or Hydroxylation:32.28;P24:Oxidation or Hydroxylation:42.68;P27:Oxidation or Hydroxylation:50.34
Sample 2	2	5	Collagen alpha-2(I) chain (Fragments) OS=Gallus gallus GN=COL1A2 PE=1 SV=2	P02467|CO1A2_CHICK	R.GFP(+15.99)GTPGPPGFK(+226.08)GIR.G	Y	21.29	1725.87	15	-4.1	576.294	3	21.65		F34:388	3	165	179	Oxidation or Hydroxylation; Biotinylation	P3:Oxidation or Hydroxylation:17.01;K12:Biotinylation:44.44
Sample 2	1	1	Collagen alpha-2(I) chain OS=Gallus gallus GN=COL1A2 PE=4 SV=1	tr|F1P0H9|F1P0H9_CHICK	K.GPKGETGPTGAIGPIGASGPP(+15.99)GPVGAAGPAGPRGDAGPP(+15.99)GMTGFP(+15.99)GAAGR.V	N	42.06	4349.12	50	1.6	1088.29	4	22.02		F34:399	1	744	793	Oxidation or Hydroxylation	P21:Oxidation or Hydroxylation:12.28;P39:Oxidation or Hydroxylation:12.28;P45:Oxidation or Hydroxylation:0.00
Sample 2	2	5	Collagen alpha-2(I) chain (Fragments) OS=Gallus gallus GN=COL1A2 PE=1 SV=2	P02467|CO1A2_CHICK	K.GPKGETGPTGAIGPIGASGPP(+15.99)GPVGAAGPAGPRGDAGPP(+15.99)GMTGFP(+15.99)GAAGR.V	N	42.06	4349.12	50	1.6	1088.29	4	22.02		F34:399	1	743	792	Oxidation or Hydroxylation	P21:Oxidation or Hydroxylation:12.28;P39:Oxidation or Hydroxylation:12.28;P45:Oxidation or Hydroxylation:0.00
Sample 2	1	1	Collagen alpha-2(I) chain OS=Gallus gallus GN=COL1A2 PE=4 SV=1	tr|F1P0H9|F1P0H9_CHICK	R.GLP(+15.99)GIAGATGEP(+15.99)GPLGVSGP(+15.99)PGAR.G	N	39.67	2132.09	24	1.3	1067.05	2	22.92		F34:423	4	882	905	Oxidation or Hydroxylation	P3:Oxidation or Hydroxylation:122.88;P12:Oxidation or Hydroxylation:26.31;P20:Oxidation or Hydroxylation:0.00
Sample 2	2	5	Collagen alpha-2(I) chain (Fragments) OS=Gallus gallus GN=COL1A2 PE=1 SV=2	P02467|CO1A2_CHICK	R.GLP(+15.99)GIAGATGEP(+15.99)GPLGVSGP(+15.99)PGAR.G	N	39.67	2132.09	24	1.3	1067.05	2	22.92		F34:423	4	881	904	Oxidation or Hydroxylation	P3:Oxidation or Hydroxylation:122.88;P12:Oxidation or Hydroxylation:26.31;P20:Oxidation or Hydroxylation:0.00
Sample 2	7	85	Uncharacterized protein OS=Gallus gallus GN=COL4A6 PE=4 SV=2	tr|F1P3T8|F1P3T8_CHICK	R.GDVGPPGLPVLGAQEQ(+.98)A.L	Y	22.72	1604.8	17	6.8	803.415	2	23.04		F34:427	2	957	973	Deamidation (NQ)	Q16:Deamidation (NQ):0.00
Sample 2	1	1	Collagen alpha-2(I) chain OS=Gallus gallus GN=COL1A2 PE=4 SV=1	tr|F1P0H9|F1P0H9_CHICK	K.GPSGEAGAAGPP(+15.99)GTP(+15.99)GPQGILGAPGILGLP(+15.99)GSR(+15.99)GER.G	Y	18.97	3268.64	36	2.4	1090.56	3	25.46		F34:474	1	846	881	Oxidation or Hydroxylation	P12:Oxidation or Hydroxylation:17.01;P15:Oxidation or Hydroxylation:0.00;P30:Oxidation or Hydroxylation:2.36;R33:Oxidation or Hydroxylation:4.52
Sample 2	3	4	Collagen alpha-1(I) chain OS=Gallus gallus GN=COL1A1 PE=1 SV=3	P02457|CO1A1_CHICK	K.ALLLQGANEIEIR.A	Y	32.28	1438.81	13	0.2	720.415	2	26.86		F34:497	1	1376	1388
Sample 2	9	1205	Uncharacterized protein (Fragment) OS=Gallus gallus GN=KRT8 PE=3 SV=2	tr|H9KZP2|H9KZP2_CHICK	R.SLDLDSIIAEVK.A	Y	29.95	1301.71	12	0.8	651.862	2	32.47		F34:577	1	148	159
Sample 2	4	8	SPARC OS=Gallus gallus GN=SPARC PE=4 SV=1	tr|F1P291|F1P291_CHICK	K.FIPAC(+57.02)LDTELTEFPLR.M	Y	40.59	1920.97	16	1.3	961.491	2	33.11		F34:586	4	146	161	Carbamidomethylation	C5:Carbamidomethylation:1000.00
Sample 2	4	9	SPARC OS=Gallus gallus GN=SPARC PE=2 SV=1	P36377|SPRC_CHICK	K.FIPAC(+57.02)LDTELTEFPLR.M	Y	40.59	1920.97	16	1.3	961.491	2	33.11		F34:586	4	146	161	Carbamidomethylation	C5:Carbamidomethylation:1000.00
Sample 2	3	4	Collagen alpha-1(I) chain OS=Gallus gallus GN=COL1A1 PE=1 SV=3	P02457|CO1A1_CHICK	R.GLTGPIGP(+15.99)PGPAGAPGD(+15.99)KGEAGPP(+15.99)GPAGPTGAR.G	Y	28.02	2878.42	33	0.3	960.481	3	34.87		F34:607	1	753	785	Oxidation or Hydroxylation	P8:Oxidation or Hydroxylation:22.45;D17:Oxidation or Hydroxylation:30.10;P24:Oxidation or Hydroxylation:20.41
Sample 2	1	1	Collagen alpha-2(I) chain OS=Gallus gallus GN=COL1A2 PE=4 SV=1	tr|F1P0H9|F1P0H9_CHICK	G.ES(+340.09)GAVGPAGPIGSR.G	N	18.51	1593.72	14	-9.3	797.861	2	35.7		F34:614	1	595	608	Phosphopantetheine	S2:Phosphopantetheine:81.27
Sample 2	2	5	Collagen alpha-2(I) chain (Fragments) OS=Gallus gallus GN=COL1A2 PE=1 SV=2	P02467|CO1A2_CHICK	G.ES(+340.09)GAVGPAGPIGSR.G	N	18.51	1593.72	14	-9.3	797.861	2	35.7		F34:614	1	594	607	Phosphopantetheine	S2:Phosphopantetheine:81.27
Sample 2	10	7	Uncharacterized protein OS=Gallus gallus GN=AHSG PE=4 SV=1	tr|E1BZE1|E1BZE1_CHICK	K.NPDVYLMLLEIGR.A	Y	26.13	1531.81	13	1.5	766.912	2	35.9		F34:616	1	172	184
