# Supplementary material for: Bone protein “extractomics”: comparing the efficiency of bone protein extractions of Gallus gallus in tandem mass spectrometry, with an eye towards paleoproteomics
Source: PeerJ. 2016 Oct 27;4:e2603. doi: 10.7717/peerj.2603 (PMC5088622; doi:10.7717/peerj.2603)
Supplement: Table S23 [file peerj-04-2603-s027.xlsx]

## Sheet: Peptides
Table S23. Peptides identified in samples from Method 6, speed vacuumed ABC (20 mL/g), post-EDTA (20-E/ABC-SV) @ 1% FDR
Sample #	Protein Group	Protein ID	Protein Description	Protein Accession	Peptide	Unique	-10lgP	Mass	Length	ppm	m/z	z	RT	Area	Scan	#Spec	Start	End	PTM	AScore
Sample 1	1	1	Collagen alpha-2(I) chain OS=Gallus gallus GN=COL1A2 PE=4 SV=1	tr|F1P0H9|F1P0H9_CHICK	R.GASGPVGAKGPN(+.98)GDAGRPGEP(+15.99)GLM(+15.99)GPR.G	Y	32.27	2491.19	27	-0.3	623.804	4	14.37		F21:177	1	423	449	Deamidation (NQ); Oxidation or Hydroxylation; Oxidation (M)	N12:Deamidation (NQ):1000.00;P21:Oxidation or Hydroxylation:0.00;M24:Oxidation (M):1000.00
Sample 1	1	1	Collagen alpha-2(I) chain OS=Gallus gallus GN=COL1A2 PE=4 SV=1	tr|F1P0H9|F1P0H9_CHICK	R.GLHGEFGVPGPAGPR(+15.99)GER.G	Y	43.13	1804.9	18	0.4	602.64	3	15.04		F21:200	1	573	590	Oxidation or Hydroxylation	R15:Oxidation or Hydroxylation:0.00
Sample 1	1	1	Collagen alpha-2(I) chain OS=Gallus gallus GN=COL1A2 PE=4 SV=1	tr|F1P0H9|F1P0H9_CHICK	R.GPSGPP(+15.99)GPDGNKGEP(+15.99)GNVGPAGAP(+15.99)GPAGPGGIP(+15.99)GER.G	Y	33.96	3191.49	36	1.2	1064.84	3	15.1		F21:202	1	609	644	Oxidation or Hydroxylation	P6:Oxidation or Hydroxylation:11.12;P15:Oxidation or Hydroxylation:52.58;P24:Oxidation or Hydroxylation:101.74;P33:Oxidation or Hydroxylation:117.09
Sample 1	1	1	Collagen alpha-2(I) chain OS=Gallus gallus GN=COL1A2 PE=4 SV=1	tr|F1P0H9|F1P0H9_CHICK	R.GLP(+15.99)GAIGAP(+15.99)GPAGGAGDRGEGGPAGPAGPAGAR.G	Y	31.48	2724.33	33	1	909.119	3	16.08		F21:235	3	675	707	Oxidation or Hydroxylation	P3:Oxidation or Hydroxylation:99.62;P9:Oxidation or Hydroxylation:20.41
Sample 1	2	4	Collagen alpha-1(I) chain OS=Gallus gallus GN=COL1A1 PE=1 SV=3	P02457|CO1A1_CHICK	R.GFP(+15.99)GADGIAGPKGPP(+15.99)GER.G	Y	17.21	1710.83	18	1.7	856.425	2	16.13		F21:237	1	483	500	Oxidation or Hydroxylation	P3:Oxidation or Hydroxylation:0.00;P15:Oxidation or Hydroxylation:14.02
Sample 1	1	1	Collagen alpha-2(I) chain OS=Gallus gallus GN=COL1A2 PE=4 SV=1	tr|F1P0H9|F1P0H9_CHICK	R.GPP(+15.99)GPSGPPGKDGRN(+.98)GLP(+15.99)GPIGPAGVR.G	Y	21.25	2493.27	27	1.1	832.099	3	16.5		F21:250	1	1053	1079	Oxidation or Hydroxylation; Deamidation (NQ)	P3:Oxidation or Hydroxylation:17.01;N15:Deamidation (NQ):1000.00;P18:Oxidation or Hydroxylation:9.40
Sample 1	2	4	Collagen alpha-1(I) chain OS=Gallus gallus GN=COL1A1 PE=1 SV=3	P02457|CO1A1_CHICK	K.GSPGAD(+15.99)GPIGAP(+15.99)GTP(+15.99)GPQGIAGQR.G	Y	24.92	2162.04	24	0.9	1082.03	2	16.6		F21:253	1	924	947	Oxidation or Hydroxylation	D6:Oxidation or Hydroxylation:3.64;P12:Oxidation or Hydroxylation:67.69;P15:Oxidation or Hydroxylation:13.67
Sample 1	2	4	Collagen alpha-1(I) chain OS=Gallus gallus GN=COL1A1 PE=1 SV=3	P02457|CO1A1_CHICK	R.GLTGPIGPPGPAGAPGDK(+42.01)GE(+21.98)AGPPGPAGPTGAR.G	Y	21.28	2894.43	33	-3.6	965.813	3	16.89		F21:263	1	753	785	Acetylation (K); Sodium adduct	K18:Acetylation (K):1000.00;E20:Sodium adduct:0.00
Sample 1	2	4	Collagen alpha-1(I) chain OS=Gallus gallus GN=COL1A1 PE=1 SV=3	P02457|CO1A1_CHICK	R.GLTGPIGPP(+15.99)GPAGAP(+15.99)GDKGEAGPP(+15.99)GPAGPTGAR.G	Y	46.82	2878.42	33	1.8	960.483	3	17.12		F21:271	9	753	785	Oxidation or Hydroxylation	P9:Oxidation or Hydroxylation:42.89;P15:Oxidation or Hydroxylation:49.35;P24:Oxidation or Hydroxylation:56.47
Sample 1	1	1	Collagen alpha-2(I) chain OS=Gallus gallus GN=COL1A2 PE=4 SV=1	tr|F1P0H9|F1P0H9_CHICK	K.GETGPAGPP(+15.99)GFQGLP(+15.99)GPSGPAGEAGKP(+15.99)GER.G	Y	52.49	2776.31	30	1	926.443	3	18.45		F21:317	3	543	572	Oxidation or Hydroxylation	P9:Oxidation or Hydroxylation:77.13;P15:Oxidation or Hydroxylation:38.32;P27:Oxidation or Hydroxylation:38.98
Sample 1	1	1	Collagen alpha-2(I) chain OS=Gallus gallus GN=COL1A2 PE=4 SV=1	tr|F1P0H9|F1P0H9_CHICK	R.VGPIGPAGNRGEPGN(+15.99)IGFPGPK(+15.99).G	Y	25.34	2119.08	22	1	707.368	3	18.69		F21:325	2	476	497	Oxidation or Hydroxylation	N15:Oxidation or Hydroxylation:0.00;K22:Oxidation or Hydroxylation:0.00
Sample 1	2	4	Collagen alpha-1(I) chain OS=Gallus gallus GN=COL1A1 PE=1 SV=3	P02457|CO1A1_CHICK	R.GFSGLQGP(+15.99)PGPP(+15.99)GAP(+15.99)GEQGPSGASGPAGPR.G	Y	34.41	2688.25	30	1.1	897.092	3	18.81		F21:329	2	1101	1130	Oxidation or Hydroxylation	P8:Oxidation or Hydroxylation:22.09;P12:Oxidation or Hydroxylation:17.73;P15:Oxidation or Hydroxylation:42.68
Sample 1	1	1	Collagen alpha-2(I) chain OS=Gallus gallus GN=COL1A2 PE=4 SV=1	tr|F1P0H9|F1P0H9_CHICK	R.VGPIGPAGNRGEPGN(+15.99)IGFPGP(+15.99)K.G	Y	32.89	2119.08	22	1	1060.55	2	18.86		F21:331	1	476	497	Oxidation or Hydroxylation	N15:Oxidation or Hydroxylation:0.00;P21:Oxidation or Hydroxylation:0.00
Sample 1	2	4	Collagen alpha-1(I) chain OS=Gallus gallus GN=COL1A1 PE=1 SV=3	P02457|CO1A1_CHICK	R.GFSGLQGPP(+15.99)GPP(+15.99)GAP(+15.99)GEQGPSGASGPAGPR.G	Y	47.65	2688.25	30	1.9	1345.14	2	19.01		F21:336	6	1101	1130	Oxidation or Hydroxylation	P9:Oxidation or Hydroxylation:20.76;P12:Oxidation or Hydroxylation:77.13;P15:Oxidation or Hydroxylation:52.68
Sample 1	1	1	Collagen alpha-2(I) chain OS=Gallus gallus GN=COL1A2 PE=4 SV=1	tr|F1P0H9|F1P0H9_CHICK	K.GAAGLP(+15.99)GVAGAP(+15.99)GLPGP(+15.99)R.G	Y	35.64	1561.82	18	1.2	781.919	2	19.22		F21:343	1	309	326	Oxidation or Hydroxylation	P6:Oxidation or Hydroxylation:124.12;P12:Oxidation or Hydroxylation:26.52;P17:Oxidation or Hydroxylation:0.00
Sample 1	2	4	Collagen alpha-1(I) chain OS=Gallus gallus GN=COL1A1 PE=1 SV=3	P02457|CO1A1_CHICK	R.GQAGVMGFP(+15.99)GPK.G	Y	39.61	1160.56	12	0.8	581.29	2	19.25		F21:344	2	564	575	Oxidation or Hydroxylation	P9:Oxidation or Hydroxylation:4.64
Sample 1	1	1	Collagen alpha-2(I) chain OS=Gallus gallus GN=COL1A2 PE=4 SV=1	tr|F1P0H9|F1P0H9_CHICK	K.GAAGLP(+15.99)GVAGAP(+15.99)GLP(+15.99)GPR.G	Y	33.91	1561.82	18	1.2	781.919	2	19.5		F21:352	1	309	326	Oxidation or Hydroxylation	P6:Oxidation or Hydroxylation:112.13;P12:Oxidation or Hydroxylation:30.64;P15:Oxidation or Hydroxylation:0.00
Sample 1	1	1	Collagen alpha-2(I) chain OS=Gallus gallus GN=COL1A2 PE=4 SV=1	tr|F1P0H9|F1P0H9_CHICK	K.GPK(+15.99)GETGPTGAIGPIGASGPP(+15.99)GPVGAAGPAGPR.G	Y	51.49	2836.45	33	1	946.49	3	19.55		F21:354	2	744	776	Oxidation or Hydroxylation	K3:Oxidation or Hydroxylation:0.00;P21:Oxidation or Hydroxylation:104.64
Sample 1	1	1	Collagen alpha-2(I) chain OS=Gallus gallus GN=COL1A2 PE=4 SV=1	tr|F1P0H9|F1P0H9_CHICK	R.VGPIGPAGN(+.98)RGEP(+15.99)GNIGFP(+15.99)GPK.G	Y	30.12	2120.06	22	1.1	707.696	3	19.6		F21:356	1	476	497	Deamidation (NQ); Oxidation or Hydroxylation	N9:Deamidation (NQ):22.09;P13:Oxidation or Hydroxylation:0.00;P19:Oxidation or Hydroxylation:0.00
Sample 1	1	1	Collagen alpha-2(I) chain OS=Gallus gallus GN=COL1A2 PE=4 SV=1	tr|F1P0H9|F1P0H9_CHICK	R.VGPIGPAGN(+.98)RGEPGN(+15.99)IGFP(+15.99)GPK.G	Y	30.68	2120.06	22	1.2	707.696	3	19.76		F21:361	1	476	497	Deamidation (NQ); Oxidation or Hydroxylation	N9:Deamidation (NQ):6.67;N15:Oxidation or Hydroxylation:7.32;P19:Oxidation or Hydroxylation:14.02
Sample 1	1	1	Collagen alpha-2(I) chain OS=Gallus gallus GN=COL1A2 PE=4 SV=1	tr|F1P0H9|F1P0H9_CHICK	R.N(+.98)GLP(+15.99)GPIGPAGVR.G	Y	36.93	1220.65	13	0.8	611.333	2	19.84		F21:364	1	1067	1079	Deamidation (NQ); Oxidation or Hydroxylation	N1:Deamidation (NQ):1000.00;P4:Oxidation or Hydroxylation:60.92
Sample 1	1	1	Collagen alpha-2(I) chain OS=Gallus gallus GN=COL1A2 PE=4 SV=1	tr|F1P0H9|F1P0H9_CHICK	R.GEIGLP(+15.99)GSSGPVGPP(+15.99)GNP(+15.99)GAN(+.98)GLP(+15.99)GAK.G	Y	27.45	2418.17	27	0.5	1210.09	2	19.99		F21:367	1	282	308	Oxidation or Hydroxylation; Deamidation (NQ)	P6:Oxidation or Hydroxylation:47.14;P15:Oxidation or Hydroxylation:0.00;P18:Oxidation or Hydroxylation:26.02;N21:Deamidation (NQ):28.74;P24:Oxidation or Hydroxylation:0.00
Sample 1	1	1	Collagen alpha-2(I) chain OS=Gallus gallus GN=COL1A2 PE=4 SV=1	tr|F1P0H9|F1P0H9_CHICK	K.GPKGETGPTGAIGPIGASGPP(+15.99)GPVGAAGPAGPRGDAGPP(+15.99)GMTGFP(+15.99)GAAGR.V	Y	42.63	4349.12	50	0.4	1088.29	4	21.59		F21:416	1	744	793	Oxidation or Hydroxylation	P21:Oxidation or Hydroxylation:45.86;P39:Oxidation or Hydroxylation:8.82;P45:Oxidation or Hydroxylation:8.82
Sample 1	1	1	Collagen alpha-2(I) chain OS=Gallus gallus GN=COL1A2 PE=4 SV=1	tr|F1P0H9|F1P0H9_CHICK	K.GPKGETGPTGAIGPIGASGP(+15.99)PGPVGAAGPAGPRGDAGP(+15.99)PGMTGFPGAAGR(+15.99).V	Y	28.42	4349.12	50	1.8	870.834	5	21.75		F21:421	1	744	793	Oxidation or Hydroxylation	P20:Oxidation or Hydroxylation:2.87;P38:Oxidation or Hydroxylation:25.39;R50:Oxidation or Hydroxylation:88.25
Sample 1	1	1	Collagen alpha-2(I) chain OS=Gallus gallus GN=COL1A2 PE=4 SV=1	tr|F1P0H9|F1P0H9_CHICK	R.GDN(sub P)GPVGPVGPAGAFGPR.G	Y	29.34	1620.8	18	5.6	811.412	2	21.91		F21:426	1	978	995	Mutation
Sample 1	1	1	Collagen alpha-2(I) chain OS=Gallus gallus GN=COL1A2 PE=4 SV=1	tr|F1P0H9|F1P0H9_CHICK	R.GDP(+15.99)GPVGPVGPAGAFGPR.G	Y	48.1	1619.81	18	0.5	810.91	2	22.14		F21:433	4	978	995	Oxidation or Hydroxylation	P3:Oxidation or Hydroxylation:9.34
Sample 1	1	1	Collagen alpha-2(I) chain OS=Gallus gallus GN=COL1A2 PE=4 SV=1	tr|F1P0H9|F1P0H9_CHICK	R.GFP(+15.99)GTP(+15.99)GLPGFK(+15.99).G	Y	31.24	1221.6	12	0.7	611.809	2	22.16		F21:434	2	165	176	Oxidation or Hydroxylation	P3:Oxidation or Hydroxylation:11.06;P6:Oxidation or Hydroxylation:44.44;K12:Oxidation or Hydroxylation:4.05
Sample 1	4	6	Apolipoprotein A-I OS=Gallus gallus GN=APOA1 PE=1 SV=2	P08250|APOA1_CHICK	R.IRDM(+15.99)VDVYLETVK.A	Y	40.71	1595.82	13	0.8	798.919	2	22.19		F21:435	4	34	46	Oxidation (M)	M4:Oxidation (M):1000.00
Sample 1	1	1	Collagen alpha-2(I) chain OS=Gallus gallus GN=COL1A2 PE=4 SV=1	tr|F1P0H9|F1P0H9_CHICK	D.PGPVGPVGPAGAFGPR.G	Y	16.66	1431.76	16	0.1	716.888	2	22.25		F21:437	1	980	995
Sample 1	1	1	Collagen alpha-2(I) chain OS=Gallus gallus GN=COL1A2 PE=4 SV=1	tr|F1P0H9|F1P0H9_CHICK	R.GDPGPVGPVGPAGAFGPR.G	Y	50.15	1603.81	18	1.2	802.913	2	22.41		F21:442	4	978	995
Sample 1	1	1	Collagen alpha-2(I) chain OS=Gallus gallus GN=COL1A2 PE=4 SV=1	tr|F1P0H9|F1P0H9_CHICK	R.GFP(+15.99)GTP(+15.99)GLP(+15.99)GFK.G	Y	29.98	1221.6	12	0.6	611.809	2	22.43		F21:443	2	165	176	Oxidation or Hydroxylation	P3:Oxidation or Hydroxylation:8.69;P6:Oxidation or Hydroxylation:38.32;P9:Oxidation or Hydroxylation:0.00
Sample 1	1	1	Collagen alpha-2(I) chain OS=Gallus gallus GN=COL1A2 PE=4 SV=1	tr|F1P0H9|F1P0H9_CHICK	R.GLP(+15.99)GIAGATGEP(+15.99)GPLGVSGP(+15.99)PGAR.G	Y	44.17	2132.09	24	1.5	1067.05	2	22.46		F21:444	5	882	905	Oxidation or Hydroxylation	P3:Oxidation or Hydroxylation:159.14;P12:Oxidation or Hydroxylation:36.05;P20:Oxidation or Hydroxylation:0.00
Sample 1	1	1	Collagen alpha-2(I) chain OS=Gallus gallus GN=COL1A2 PE=4 SV=1	tr|F1P0H9|F1P0H9_CHICK	R.GLP(+15.99)GIAGATGEP(+15.99)GPLGVSGPPGAR(+15.99).G	Y	45.09	2132.09	24	1.2	1067.05	2	22.68		F21:451	4	882	905	Oxidation or Hydroxylation	P3:Oxidation or Hydroxylation:195.68;P12:Oxidation or Hydroxylation:36.05;R24:Oxidation or Hydroxylation:0.00
Sample 1	1	1	Collagen alpha-2(I) chain OS=Gallus gallus GN=COL1A2 PE=4 SV=1	tr|F1P0H9|F1P0H9_CHICK	R.GLP(+15.99)GIAGATGEPGP(+15.99)LGVSGPP(+15.99)GAR.G	Y	31.53	2132.09	24	0.6	711.703	3	22.71		F21:452	1	882	905	Oxidation or Hydroxylation	P3:Oxidation or Hydroxylation:81.58;P14:Oxidation or Hydroxylation:9.40;P21:Oxidation or Hydroxylation:0.00
Sample 1	1	1	Collagen alpha-2(I) chain OS=Gallus gallus GN=COL1A2 PE=4 SV=1	tr|F1P0H9|F1P0H9_CHICK	K.GETGPTGAIGPIGASGPPGP(+15.99)VGAAGPAGPRGDAGP(+15.99)PGMTGFPGAAGR(+15.99).V	Y	21.32	4066.96	47	1	1017.75	4	23.45		F21:471	1	747	793	Oxidation or Hydroxylation	P20:Oxidation or Hydroxylation:0.00;P35:Oxidation or Hydroxylation:0.00;R47:Oxidation or Hydroxylation:3.97
Sample 1	1	1	Collagen alpha-2(I) chain OS=Gallus gallus GN=COL1A2 PE=4 SV=1	tr|F1P0H9|F1P0H9_CHICK	R.GLP(+15.99)GIAGATGEPGPLGVSGPPGAR(+15.99).G	Y	39.12	2116.09	24	1.8	1059.05	2	23.79		F21:478	2	882	905	Oxidation or Hydroxylation	P3:Oxidation or Hydroxylation:140.79;R24:Oxidation or Hydroxylation:0.00
Sample 1	1	1	Collagen alpha-2(I) chain OS=Gallus gallus GN=COL1A2 PE=4 SV=1	tr|F1P0H9|F1P0H9_CHICK	R.GLP(+15.99)GIAGATGEPGPLGVSGP(+15.99)PGAR.G	Y	35.8	2116.09	24	1.1	706.372	3	23.82		F21:479	1	882	905	Oxidation or Hydroxylation	P3:Oxidation or Hydroxylation:106.84;P20:Oxidation or Hydroxylation:0.00
Sample 1	2	4	Collagen alpha-1(I) chain OS=Gallus gallus GN=COL1A1 PE=1 SV=3	P02457|CO1A1_CHICK	P.Q(-17.03)MSYGYDEK(+15.99)SAGVAVPGPMGPAGPR.G	Y	27.12	2520.14	25	1.6	1261.08	2	24.45		F21:492	2	152	176	Pyro-glu from Q; Oxidation or Hydroxylation	Q1:Pyro-glu from Q:1000.00;K9:Oxidation or Hydroxylation:15.73
Sample 1	3	8	SPARC OS=Gallus gallus GN=SPARC PE=4 SV=1	tr|F1P291|F1P291_CHICK	K.EQDIDKDLVI	Y	23.6	1186.61	10	0.7	594.312	2	24.72		F21:498	1	289	298
Sample 1	1	1	Collagen alpha-2(I) chain OS=Gallus gallus GN=COL1A2 PE=4 SV=1	tr|F1P0H9|F1P0H9_CHICK	K.GPSGEAGAAGPP(+15.99)GTP(+15.99)GPQGILGAP(+15.99)GILGLPGSRGER(+15.99).G	Y	28.3	3268.64	36	1.4	1090.56	3	25.2		F21:510	1	846	881	Oxidation or Hydroxylation	P12:Oxidation or Hydroxylation:45.16;P15:Oxidation or Hydroxylation:82.63;P24:Oxidation or Hydroxylation:6.67;R36:Oxidation or Hydroxylation:43.55
Sample 1	1	1	Collagen alpha-2(I) chain OS=Gallus gallus GN=COL1A2 PE=4 SV=1	tr|F1P0H9|F1P0H9_CHICK	K.AADFGPGPMGLMGPR.G	Y	48.9	1472.69	15	0.6	737.353	2	26.74		F21:543	4	84	98
Sample 1	1	1	Collagen alpha-2(I) chain OS=Gallus gallus GN=COL1A2 PE=4 SV=1	tr|F1P0H9|F1P0H9_CHICK	K.AADFGP(+15.99)GPMGLMGP(+15.99)R.G	Y	32.99	1504.68	15	1.5	753.348	2	27.31		F21:556	1	84	98	Oxidation or Hydroxylation	P6:Oxidation or Hydroxylation:0.00;P14:Oxidation or Hydroxylation:0.00
Sample 1	1	1	Collagen alpha-2(I) chain OS=Gallus gallus GN=COL1A2 PE=4 SV=1	tr|F1P0H9|F1P0H9_CHICK	A.Q(-17.03)YDPSK(+15.99)AADFGPGPMGLMGPR.G	Y	33.17	2189.99	21	1.6	1096	2	28.93		F21:586	3	78	98	Pyro-glu from Q; Oxidation or Hydroxylation	Q1:Pyro-glu from Q:1000.00;K6:Oxidation or Hydroxylation:15.73
Sample 1	1	1	Collagen alpha-2(I) chain OS=Gallus gallus GN=COL1A2 PE=4 SV=1	tr|F1P0H9|F1P0H9_CHICK	A.Q(-17.03)YDP(+15.99)SKAADFGPGPMGLMGPR.G	Y	33.59	2189.99	21	0.6	731.004	3	29.02		F21:589	1	78	98	Pyro-glu from Q; Oxidation or Hydroxylation	Q1:Pyro-glu from Q:1000.00;P4:Oxidation or Hydroxylation:0.00
Sample 1	1	1	Collagen alpha-2(I) chain OS=Gallus gallus GN=COL1A2 PE=4 SV=1	tr|F1P0H9|F1P0H9_CHICK	A.Q(-17.03)YDPSKAADFGPGPMGLMGPR.G	Y	31.06	2173.99	21	1.8	1088.01	2	29.06		F21:590	1	78	98	Pyro-glu from Q	Q1:Pyro-glu from Q:1000.00
Sample 1	6	20	Vitronectin OS=Gallus gallus PE=2 SV=1	tr|O12945|O12945_CHICK	R.SIAQYWLDC(+57.02)PQPDEEST	Y	20.3	2037.86	17	1.2	1019.94	2	29.77		F21:607	1	437	453	Carbamidomethylation	C9:Carbamidomethylation:1000.00
Sample 1	6	21	Uncharacterized protein OS=Gallus gallus GN=VTN PE=4 SV=2	tr|E1C7A7|E1C7A7_CHICK	R.SIAQYWLDC(+57.02)PQPDEEST	Y	20.3	2037.86	17	1.2	1019.94	2	29.77		F21:607	1	437	453	Carbamidomethylation	C9:Carbamidomethylation:1000.00
Sample 1	1	1	Collagen alpha-2(I) chain OS=Gallus gallus GN=COL1A2 PE=4 SV=1	tr|F1P0H9|F1P0H9_CHICK	R.LSHPEWSSGFYWIDPNQGC(+57.02)TADAIR.A	Y	16.07	2906.31	25	1.5	969.778	3	29.91		F21:610	1	1163	1187	Carbamidomethylation	C19:Carbamidomethylation:1000.00
Sample 1	3	8	SPARC OS=Gallus gallus GN=SPARC PE=4 SV=1	tr|F1P291|F1P291_CHICK	R.FFEAC(+57.02)DLDNDKYIAL.E	Y	27.08	1832.83	15	1.3	917.423	2	30.12		F21:613	1	264	278	Carbamidomethylation	C5:Carbamidomethylation:1000.00
Sample 1	9	7875	Hemoglobin subunit rho OS=Gallus gallus PE=1 SV=2	P02127|HBRH_CHICK	R.LLIVYPWTQR.F	Y	29.04	1287.73	10	0.6	644.875	2	30.16		F21:614	2	32	41
Sample 1	9	7876	Hemoglobin subunit epsilon OS=Gallus gallus GN=HBE PE=1 SV=2	P02128|HBE_CHICK	R.LLIVYPWTQR.F	Y	29.04	1287.73	10	0.6	644.875	2	30.16		F21:614	2	32	41
Sample 1	9	7877	Hemoglobin subunit beta OS=Gallus gallus GN=HBB PE=1 SV=2	P02112|HBB_CHICK	R.LLIVYPWTQR.F	Y	29.04	1287.73	10	0.6	644.875	2	30.16		F21:614	2	32	41
Sample 1	9	7878	Beta-H globin OS=Gallus gallus GN=HBE1 PE=3 SV=1	tr|Q90864|Q90864_CHICK	R.LLIVYPWTQR.F	Y	29.04	1287.73	10	0.6	644.875	2	30.16		F21:614	2	32	41
Sample 1	9	7879	Hemoglobin subunit epsilon OS=Gallus gallus GN=HBE PE=3 SV=1	tr|F1NMZ3|F1NMZ3_CHICK	R.LLIVYPWTQR.F	Y	29.04	1287.73	10	0.6	644.875	2	30.16		F21:614	2	32	41
Sample 1	4	6	Apolipoprotein A-I OS=Gallus gallus GN=APOA1 PE=1 SV=2	P08250|APOA1_CHICK	R.EM(+15.99)WLKDTEALRAELTKDLEEVKEK.I	Y	49.29	2919.49	24	0.4	584.905	5	30.56		F21:622	1	96	119	Oxidation (M)	M2:Oxidation (M):1000.00
Sample 1	5	3	Serum albumin OS=Gallus gallus GN=ALB PE=1 SV=2	P19121|ALBU_CHICK	K.AVAMITFAQYLQR.C	Y	24.69	1510.8	13	0.1	756.406	2	31.6		F21:641	2	48	60
Sample 1	5	3	Serum albumin OS=Gallus gallus GN=ALB PE=1 SV=2	P19121|ALBU_CHICK	K.YVPPPFNPDMFSFDEK.L	Y	19.09	1928.87	16	2.2	965.442	2	32.13		F21:650	1	525	540
Sample 1	3	8	SPARC OS=Gallus gallus GN=SPARC PE=4 SV=1	tr|F1P291|F1P291_CHICK	K.FIPAC(+57.02)LDTELTEFPLR.M	Y	41.79	1920.97	16	0.7	961.491	2	33.16		F21:668	6	146	161	Carbamidomethylation	C5:Carbamidomethylation:1000.00
Sample 1	5	3	Serum albumin OS=Gallus gallus GN=ALB PE=1 SV=2	P19121|ALBU_CHICK	K.C(+57.02)VANEDAPEC(+57.02)SKPLPSIILDEIC(+57.02)QVEK.L	Y	34.82	3113.47	27	1	1038.83	3	33.73		F21:681	1	80	106	Carbamidomethylation	C1:Carbamidomethylation:1000.00;C10:Carbamidomethylation:1000.00;C23:Carbamidomethylation:1000.00
Sample 1	6	20	Vitronectin OS=Gallus gallus PE=2 SV=1	tr|O12945|O12945_CHICK	K.LISDVWGIEGPID(+57.02)A(+14.02).A	Y	20.77	1554.79	14	0.9	778.404	2	34.24		F21:694	1	193	206	Carbamidomethylation (DHKE X@N-term); Methyl ester	D13:Carbamidomethylation (DHKE X@N-term):25.70;A14:Methyl ester:23.70
Sample 1	6	21	Uncharacterized protein OS=Gallus gallus GN=VTN PE=4 SV=2	tr|E1C7A7|E1C7A7_CHICK	K.LISDVWGIEGPID(+57.02)A(+14.02).A	Y	20.77	1554.79	14	0.9	778.404	2	34.24		F21:694	1	193	206	Carbamidomethylation (DHKE X@N-term); Methyl ester	D13:Carbamidomethylation (DHKE X@N-term):25.70;A14:Methyl ester:23.70
Sample 1	1	1	Collagen alpha-2(I) chain OS=Gallus gallus GN=COL1A2 PE=4 SV=1	tr|F1P0H9|F1P0H9_CHICK	R.LPILDIAPLDIGGADQEFGLHIGPVC(+57.02)FK	Y	22.39	3004.57	28	2	1002.53	3	37.05		F21:730	1	1336	1363	Carbamidomethylation	C26:Carbamidomethylation:1000.00
Sample 1	5	3	Serum albumin OS=Gallus gallus GN=ALB PE=1 SV=2	P19121|ALBU_CHICK	R.RHPFLYAPAILSFAVDFEHALQSC(+57.02)C(+57.02)K.E	Y	34.38	3076.51	26	4.2	770.137	4	38.09		F21:740	1	173	198	Carbamidomethylation	C24:Carbamidomethylation:1000.00;C25:Carbamidomethylation:1000.00
Sample 1	2	4	Collagen alpha-1(I) chain OS=Gallus gallus GN=COL1A1 PE=1 SV=3	P02457|CO1A1_CHICK	R.GLTGPIGP(+15.99)PGPAGAP(+15.99)GDKGEAGPP(+15.99)GPAGPTGAR.G	Y	24.47	2878.42	33	2.6	960.483	3	38.55		F21:744	2	753	785	Oxidation or Hydroxylation	P8:Oxidation or Hydroxylation:0.00;P15:Oxidation or Hydroxylation:0.00;P24:Oxidation or Hydroxylation:8.22
Sample 1	10	616	Uncharacterized protein OS=Gallus gallus GN=THBS1 PE=4 SV=2	tr|F1P0J8|F1P0J8_CHICK	K.DIQAVC(+57.02)GFSC(+57.02)DELTNMFVELQGLR.S	Y	27.93	2801.28	24	1.9	934.77	3	38.99		F21:748	1	269	292	Carbamidomethylation	C6:Carbamidomethylation:1000.00;C10:Carbamidomethylation:1000.00
Sample 1	8	259	Uncharacterized protein (Fragment) OS=Gallus gallus GN=COL5A1 PE=4 SV=2	tr|F1NI79|F1NI79_CHICK	R.ILDEEVFEGDIQQLLIVADPR.A	Y	22.24	2411.26	21	0.8	804.761	3	39.39		F21:752	2	176	196
Sample 1	8	260	Alpha 1 (V) collagen OS=Gallus gallus PE=2 SV=1	tr|Q9IAU4|Q9IAU4_CHICK	R.ILDEEVFEGDIQQLLIVADPR.A	Y	22.24	2411.26	21	0.8	804.761	3	39.39		F21:752	2	208	228
Sample 1	6	20	Vitronectin OS=Gallus gallus PE=2 SV=1	tr|O12945|O12945_CHICK	Y.AFMN(+15.99)RDS(+79.97)WEDIFLSLFGSR.M	Y	19.79	2386.05	19	0.1	796.356	3	39.97		F21:757	1	304	322	Oxidation or Hydroxylation; Phosphorylation (STY)	N4:Oxidation or Hydroxylation:0.00;S7:Phosphorylation (STY):55.73
Sample 1	6	21	Uncharacterized protein OS=Gallus gallus GN=VTN PE=4 SV=2	tr|E1C7A7|E1C7A7_CHICK	Y.AFMN(+15.99)RDS(+79.97)WEDIFLSLFGSR.M	Y	19.79	2386.05	19	0.1	796.356	3	39.97		F21:757	1	304	322	Oxidation or Hydroxylation; Phosphorylation (STY)	N4:Oxidation or Hydroxylation:0.00;S7:Phosphorylation (STY):55.73
Sample 1	11	7880	Uncharacterized protein OS=Gallus gallus GN=POSTN PE=4 SV=1	tr|F1P4N9|F1P4N9_CHICK	R.VLTAVGNTIQDFIEVEDDLSSLR.A	Y	26.19	2533.29	23	0.7	845.438	3	41.02		F21:766	1	230	252
Sample 1	11	7881	Periostin OS=Gallus gallus PE=2 SV=1	tr|Q6DMS3|Q6DMS3_CHICK	R.VLTAVGNTIQDFIEVEDDLSSLR.A	Y	26.19	2533.29	23	0.7	845.438	3	41.02		F21:766	1	230	252
Sample 1	11	7882	Uncharacterized protein OS=Gallus gallus GN=POSTN PE=4 SV=2	tr|F1N8W3|F1N8W3_CHICK	R.VLTAVGNTIQDFIEVEDDLSSLR.A	Y	26.19	2533.29	23	0.7	845.438	3	41.02		F21:766	1	230	252
Sample 1	7	19	Uncharacterized protein OS=Gallus gallus GN=SERPINF1 PE=3 SV=1	tr|E1C7H6|E1C7H6_CHICK	R.TATANVLLSPFSLATALSGLSLGAGER.T	Y	30.53	2616.41	27	1.4	873.146	3	41.22		F21:768	2	71	97
Sample 2	1	1	Collagen alpha-2(I) chain OS=Gallus gallus GN=COL1A2 PE=4 SV=1	tr|F1P0H9|F1P0H9_CHICK	R.GLHGEFGVPGPAGP(+15.99)RGER.G	Y	31.18	1804.9	18	0.5	602.64	3	14.96		F22:185	1	573	590	Oxidation or Hydroxylation	P14:Oxidation or Hydroxylation:0.00
Sample 2	1	1	Collagen alpha-2(I) chain OS=Gallus gallus GN=COL1A2 PE=4 SV=1	tr|F1P0H9|F1P0H9_CHICK	R.GLHGEFGVP(+15.99)GPAGPRGER.G	Y	28.4	1804.9	18	-0.4	903.455	2	15.01		F22:187	1	573	590	Oxidation or Hydroxylation	P9:Oxidation or Hydroxylation:7.32
Sample 2	1	1	Collagen alpha-2(I) chain OS=Gallus gallus GN=COL1A2 PE=4 SV=1	tr|F1P0H9|F1P0H9_CHICK	R.GPSGP(+15.99)PGPDGNKGEP(+15.99)GNVGPAGAP(+15.99)GPAGPGGIP(+15.99)GER.G	Y	29.3	3191.49	36	1.9	1064.84	3	15.29		F22:196	1	609	644	Oxidation or Hydroxylation	P5:Oxidation or Hydroxylation:9.42;P15:Oxidation or Hydroxylation:33.54;P24:Oxidation or Hydroxylation:46.62;P33:Oxidation or Hydroxylation:44.44
Sample 2	1	1	Collagen alpha-2(I) chain OS=Gallus gallus GN=COL1A2 PE=4 SV=1	tr|F1P0H9|F1P0H9_CHICK	R.VGP(+15.99)P(+15.99)GPAGITGPP(+15.99)GPP(+15.99)GPAGK.D	Y	27.01	1840.93	21	1.4	921.475	2	15.82		F22:214	3	794	814	Oxidation or Hydroxylation	P3:Oxidation or Hydroxylation:29.32;P4:Oxidation or Hydroxylation:12.81;P13:Oxidation or Hydroxylation:20.00;P16:Oxidation or Hydroxylation:11.06
Sample 2	2	4	Collagen alpha-1(I) chain OS=Gallus gallus GN=COL1A1 PE=1 SV=3	P02457|CO1A1_CHICK	K.GSP(+15.99)GADGPIGAP(+15.99)GTP(+15.99)GPQGIAGQR.G	Y	29.23	2162.04	24	1.7	1082.03	2	16.56		F22:239	1	924	947	Oxidation or Hydroxylation	P3:Oxidation or Hydroxylation:0.00;P12:Oxidation or Hydroxylation:55.60;P15:Oxidation or Hydroxylation:15.73
Sample 2	1	1	Collagen alpha-2(I) chain OS=Gallus gallus GN=COL1A2 PE=4 SV=1	tr|F1P0H9|F1P0H9_CHICK	R.GLHGEFGVP(+15.99)GPAGPR.G	Y	20.27	1462.73	15	0.8	488.585	3	16.95		F22:252	2	573	587	Oxidation or Hydroxylation	P9:Oxidation or Hydroxylation:28.73
Sample 2	1	1	Collagen alpha-2(I) chain OS=Gallus gallus GN=COL1A2 PE=4 SV=1	tr|F1P0H9|F1P0H9_CHICK	R.VGPIGPAGNRGEP(+15.99)GNIGFP(+15.99)GPK.G	Y	30.4	2119.08	22	1.5	1060.55	2	18.78		F22:314	3	476	497	Oxidation or Hydroxylation	P13:Oxidation or Hydroxylation:22.85;P19:Oxidation or Hydroxylation:0.00
Sample 2	2	4	Collagen alpha-1(I) chain OS=Gallus gallus GN=COL1A1 PE=1 SV=3	P02457|CO1A1_CHICK	R.GQAGVMGFPGP(+15.99)K.G	Y	36.85	1160.56	12	0.3	581.29	2	19.14	8490000	F22:326	1	564	575	Oxidation or Hydroxylation	P11:Oxidation or Hydroxylation:0.00
Sample 2	1	1	Collagen alpha-2(I) chain OS=Gallus gallus GN=COL1A2 PE=4 SV=1	tr|F1P0H9|F1P0H9_CHICK	K.GAAGLP(+15.99)GVAGAP(+15.99)GLPGPR(+15.99).G	Y	30.61	1561.82	18	1.2	781.919	2	19.2	146000000	F22:328	1	309	326	Oxidation or Hydroxylation	P6:Oxidation or Hydroxylation:81.94;P12:Oxidation or Hydroxylation:14.62;R18:Oxidation or Hydroxylation:0.00
Sample 2	1	1	Collagen alpha-2(I) chain OS=Gallus gallus GN=COL1A2 PE=4 SV=1	tr|F1P0H9|F1P0H9_CHICK	K.GP(+15.99)KGETGPTGAIGPIGASGPP(+15.99)GPVGAAGPAGPR.G	Y	55.25	2836.45	33	0.4	946.49	3	19.3	26000000	F22:332	1	744	776	Oxidation or Hydroxylation	P2:Oxidation or Hydroxylation:0.00;P21:Oxidation or Hydroxylation:11.06
Sample 2	1	1	Collagen alpha-2(I) chain OS=Gallus gallus GN=COL1A2 PE=4 SV=1	tr|F1P0H9|F1P0H9_CHICK	K.GPKGETGPTGAIGPIGASGPP(+15.99)GPVGAAGPAGPR.G	Y	52.2	2820.45	33	1	941.159	3	19.45	32800000	F22:337	2	744	776	Oxidation or Hydroxylation	P21:Oxidation or Hydroxylation:12.28
Sample 2	1	1	Collagen alpha-2(I) chain OS=Gallus gallus GN=COL1A2 PE=4 SV=1	tr|F1P0H9|F1P0H9_CHICK	R.VGPIGPAGNR(+15.99)GEPGN(+.98)IGFPGP(+15.99)K.G	Y	23.01	2120.06	22	0.6	707.696	3	19.5	70900000	F22:339	1	476	497	Oxidation or Hydroxylation; Deamidation (NQ)	R10:Oxidation or Hydroxylation:8.14;N15:Deamidation (NQ):10.62;P21:Oxidation or Hydroxylation:0.00
Sample 2	2	4	Collagen alpha-1(I) chain OS=Gallus gallus GN=COL1A1 PE=1 SV=3	P02457|CO1A1_CHICK	R.GFSGLQGP(+15.99)PGPPGAP(+15.99)GEQGPSGASGPAGPR.G	Y	23.92	2672.26	30	0.8	891.761	3	19.87		F22:351	1	1101	1130	Oxidation or Hydroxylation	P8:Oxidation or Hydroxylation:0.00;P15:Oxidation or Hydroxylation:28.36
Sample 2	1	1	Collagen alpha-2(I) chain OS=Gallus gallus GN=COL1A2 PE=4 SV=1	tr|F1P0H9|F1P0H9_CHICK	R.GSDGSAGPTGPAGPIGAAGPP(+15.99)GFP(+15.99)GAP(+15.99)GAK.G	Y	43	2520.19	30	0.1	1261.1	2	20.77		F22:380	1	234	263	Oxidation or Hydroxylation	P21:Oxidation or Hydroxylation:110.43;P24:Oxidation or Hydroxylation:150.82;P27:Oxidation or Hydroxylation:0.00
Sample 2	4	6	Apolipoprotein A-I OS=Gallus gallus GN=APOA1 PE=1 SV=2	P08250|APOA1_CHICK	K.LADNLDTLSAAAAK.L	Y	41.97	1372.72	14	0.4	687.367	2	21.17		F22:392	2	69	82
Sample 2	1	1	Collagen alpha-2(I) chain OS=Gallus gallus GN=COL1A2 PE=4 SV=1	tr|F1P0H9|F1P0H9_CHICK	K.GPKGETGPTGAIGPIGASGPP(+15.99)GPVGAAGPAGPRGDAGPP(+15.99)GMTGFPGAAGR(+15.99).V	Y	51.07	4349.12	50	2.4	1088.29	4	21.52		F22:400	1	744	793	Oxidation or Hydroxylation	P21:Oxidation or Hydroxylation:91.25;P39:Oxidation or Hydroxylation:36.42;R50:Oxidation or Hydroxylation:27.94
Sample 2	1	1	Collagen alpha-2(I) chain OS=Gallus gallus GN=COL1A2 PE=4 SV=1	tr|F1P0H9|F1P0H9_CHICK	K.GETGPTGAIGPIGASGPP(+15.99)GPVGAAGPAGPR.G	Y	21.61	2538.28	30	1.6	1270.15	2	21.64		F22:404	1	747	776	Oxidation or Hydroxylation	P18:Oxidation or Hydroxylation:14.02
Sample 2	1	1	Collagen alpha-2(I) chain OS=Gallus gallus GN=COL1A2 PE=4 SV=1	tr|F1P0H9|F1P0H9_CHICK	K.GPKGETGPTGAIGP(+15.99)IGASGPPGPVGAAGPAGPRGDAGPPGM(+15.99)TGFPGAAGR(+15.99).V	Y	18.89	4349.12	50	4.3	1088.29	4	22.02		F22:416	1	744	793	Oxidation or Hydroxylation; Oxidation (M)	P14:Oxidation or Hydroxylation:0.00;M41:Oxidation (M):1000.00;R50:Oxidation or Hydroxylation:0.00
Sample 2	1	1	Collagen alpha-2(I) chain OS=Gallus gallus GN=COL1A2 PE=4 SV=1	tr|F1P0H9|F1P0H9_CHICK	K.GETGPTGAIGPIGASGP(+15.99)PGPVGAAGPAGPRGDAGPP(+15.99)GMTGFPGAAGR(+15.99).V	Y	31.55	4066.96	47	2.9	1356.66	3	23.51		F22:458	1	747	793	Oxidation or Hydroxylation	P17:Oxidation or Hydroxylation:0.00;P36:Oxidation or Hydroxylation:3.97;R47:Oxidation or Hydroxylation:0.00
Sample 2	5	3	Serum albumin OS=Gallus gallus GN=ALB PE=1 SV=2	P19121|ALBU_CHICK	K.QSDINTCFGE(+57.02)EGANLIVQSR.A	Y	15.28	2237.04	20	0.5	1119.53	2	26.16		F22:512	1	589	608	Carbamidomethylation (DHKE X@N-term)	E10:Carbamidomethylation (DHKE X@N-term):0.00
Sample 2	1	1	Collagen alpha-2(I) chain OS=Gallus gallus GN=COL1A2 PE=4 SV=1	tr|F1P0H9|F1P0H9_CHICK	K.AADFGPGPM(+15.99)GLM(+15.99)GPR.G	Y	41.18	1504.68	15	1.3	753.348	2	26.91		F22:527	1	84	98	Oxidation (M)	M9:Oxidation (M):1000.00;M12:Oxidation (M):1000.00
Sample 2	1	1	Collagen alpha-2(I) chain OS=Gallus gallus GN=COL1A2 PE=4 SV=1	tr|F1P0H9|F1P0H9_CHICK	A.ADFGPGPMGLMGPR.G	Y	42.83	1401.65	14	0.9	701.835	2	26.97		F22:529	2	85	98
Sample 2	1	1	Collagen alpha-2(I) chain OS=Gallus gallus GN=COL1A2 PE=4 SV=1	tr|F1P0H9|F1P0H9_CHICK	K.AADFGPGPM(+15.99)GLMGPR.G	Y	42.31	1488.69	15	1	745.351	2	27.03		F22:531	1	84	98	Oxidation (M)	M9:Oxidation (M):13.03
Sample 2	1	1	Collagen alpha-2(I) chain OS=Gallus gallus GN=COL1A2 PE=4 SV=1	tr|F1P0H9|F1P0H9_CHICK	Q.GILGAP(+15.99)GILGLP(+15.99)GSR.G	Y	32.08	1408.8	15	1.1	705.41	2	27.61		F22:546	1	864	878	Oxidation or Hydroxylation	P6:Oxidation or Hydroxylation:106.84;P12:Oxidation or Hydroxylation:0.00
Sample 2	1	1	Collagen alpha-2(I) chain OS=Gallus gallus GN=COL1A2 PE=4 SV=1	tr|F1P0H9|F1P0H9_CHICK	A.DFGPGPMGLMGPR.G	Y	44.12	1330.62	13	0.7	666.316	2	27.65		F22:547	1	86	98
Sample 2	1	1	Collagen alpha-2(I) chain OS=Gallus gallus GN=COL1A2 PE=4 SV=1	tr|F1P0H9|F1P0H9_CHICK	R.DGED(+15.99)GP(+15.99)P(+15.99)GPPGPPGPPGLGGNFAAQYDPSKAADFGPGPMGLMGPR.G	Y	31.37	4346.96	45	7.1	1087.76	4	29.25		F22:578	1	54	98	Oxidation or Hydroxylation	D4:Oxidation or Hydroxylation:0.00;P6:Oxidation or Hydroxylation:0.00;P7:Oxidation or Hydroxylation:0.00
Sample 2	4	6	Apolipoprotein A-I OS=Gallus gallus GN=APOA1 PE=1 SV=2	P08250|APOA1_CHICK	R.LISFLDELQK.S	Y	31.33	1204.67	10	0.6	603.343	2	30.22		F22:598	1	252	261
Sample 2	3	8	SPARC OS=Gallus gallus GN=SPARC PE=4 SV=1	tr|F1P291|F1P291_CHICK	Y.IFPVHWQF.G	Y	15.76	1072.55	8	0.8	537.282	2	31.73		F22:625	1	223	230
Sample 2	6	20	Vitronectin OS=Gallus gallus PE=2 SV=1	tr|O12945|O12945_CHICK	K.LISDVWGIEGPIDAAFTR.I	Y	40.32	1959.01	18	0.7	654.011	3	34.6		F22:680	2	193	210
Sample 2	6	21	Uncharacterized protein OS=Gallus gallus GN=VTN PE=4 SV=2	tr|E1C7A7|E1C7A7_CHICK	K.LISDVWGIEGPIDAAFTR.I	Y	40.32	1959.01	18	0.7	654.011	3	34.6		F22:680	2	193	210
Sample 2	6	20	Vitronectin OS=Gallus gallus PE=2 SV=1	tr|O12945|O12945_CHICK	S.D(+314.19)VWGIEGPIDAAFTR.I	Y	19.79	1960	15	8.8	981.015	2	34.64		F22:681	1	196	210	Levuglandinyl-lysine anhydrolactam adduct	D1:Levuglandinyl-lysine anhydrolactam adduct:1000.00
Sample 2	6	21	Uncharacterized protein OS=Gallus gallus GN=VTN PE=4 SV=2	tr|E1C7A7|E1C7A7_CHICK	S.D(+314.19)VWGIEGPIDAAFTR.I	Y	19.79	1960	15	8.8	981.015	2	34.64		F22:681	1	196	210	Levuglandinyl-lysine anhydrolactam adduct	D1:Levuglandinyl-lysine anhydrolactam adduct:1000.00
Sample 2	6	20	Vitronectin OS=Gallus gallus PE=2 SV=1	tr|O12945|O12945_CHICK	K.LISDVW(+31.99)GIEGPIDAAFTR.I	Y	18.72	1991	18	-0.5	996.507	2	34.75		F22:683	1	193	210	Dihydroxy	W6:Dihydroxy:56.99
Sample 2	6	21	Uncharacterized protein OS=Gallus gallus GN=VTN PE=4 SV=2	tr|E1C7A7|E1C7A7_CHICK	K.LISDVW(+31.99)GIEGPIDAAFTR.I	Y	18.72	1991	18	-0.5	996.507	2	34.75		F22:683	1	193	210	Dihydroxy	W6:Dihydroxy:56.99
Sample 2	7	19	Uncharacterized protein OS=Gallus gallus GN=SERPINF1 PE=3 SV=1	tr|E1C7H6|E1C7H6_CHICK	R.LTFPIEYHVDRPFLLVLRDDTTGTLLFIGK.I	Y	33.6	3488.91	30	1.7	873.236	4	35.16		F22:688	2	385	414
Sample 2	5	3	Serum albumin OS=Gallus gallus GN=ALB PE=1 SV=2	P19121|ALBU_CHICK	K.C(+57.02)VANEDAPEC(+57.02)SKPLPSIILDEIC(+57.02)QVEKLR.D	Y	24.62	3382.66	29	2.4	846.674	4	35.38		F22:692	1	80	108	Carbamidomethylation	C1:Carbamidomethylation:1000.00;C10:Carbamidomethylation:1000.00;C23:Carbamidomethylation:1000.00
Sample 2	5	3	Serum albumin OS=Gallus gallus GN=ALB PE=1 SV=2	P19121|ALBU_CHICK	R.RHPFLYAPAILSFAVDFEHALQSC(+57.02)CK(+57.02).E	Y	29.85	3076.51	26	0	770.134	4	38.42		F22:726	1	173	198	Carbamidomethylation; Carbamidomethylation (DHKE X@N-term)	C24:Carbamidomethylation:1000.00;K26:Carbamidomethylation (DHKE X@N-term):5.59
Sample 2	2	4	Collagen alpha-1(I) chain OS=Gallus gallus GN=COL1A1 PE=1 SV=3	P02457|CO1A1_CHICK	R.GLTGPIGPPGP(+15.99)AGAPGD(+15.99)KGEAGPP(+15.99)GPAGPTGAR.G	Y	22.95	2878.42	33	4.4	960.485	3	39.76		F22:738	1	753	785	Oxidation or Hydroxylation	P11:Oxidation or Hydroxylation:4.05;D17:Oxidation or Hydroxylation:0.00;P24:Oxidation or Hydroxylation:5.47
Sample 2	2	4	Collagen alpha-1(I) chain OS=Gallus gallus GN=COL1A1 PE=1 SV=3	P02457|CO1A1_CHICK	R.GLTGPIGPP(+15.99)GPAGAPGDK(+15.99)GEAGPPGPAGPTGAR(+15.99).G	Y	18.2	2878.42	33	-0.1	960.481	3	40.4		F22:744	1	753	785	Oxidation or Hydroxylation	P9:Oxidation or Hydroxylation:14.02;K18:Oxidation or Hydroxylation:0.00;R33:Oxidation or Hydroxylation:0.00
