# Supplementary material for: Bone protein “extractomics”: comparing the efficiency of bone protein extractions of Gallus gallus in tandem mass spectrometry, with an eye towards paleoproteomics
Source: PeerJ. 2016 Oct 27;4:e2603. doi: 10.7717/peerj.2603 (PMC5088622; doi:10.7717/peerj.2603)
Supplement: Table S24 [file peerj-04-2603-s028.xlsx]

## Sheet: Peptides
Table S24. Peptides identified in samples from Method 6, dialyzed GuHCl (20 mL/g), post-EDTA, post-ABC, (20-E/A/GuHCl-D) @ 1% FDR
Sample #	Protein Group	Protein ID	Protein Description	Protein Accession	Peptide	Unique	-10lgP	Mass	Length	ppm	m/z	z	RT	Area	Scan	#Spec	Start	End	PTM	AScore
Sample 1	2	4	Collagen alpha-1(I) chain OS=Gallus gallus GN=COL1A1 PE=1 SV=3	P02457|CO1A1_CHICK	R.GAP(+15.99)GPP(+15.99)GAVGAAGKDGEAGAQGPP(+15.99)GPTGPAGER.G	Y	28.6	2855.34	33	1.4	952.79	3	13.45		F25:122	1	588	620	Oxidation or Hydroxylation	P3:Oxidation or Hydroxylation:11.10;P6:Oxidation or Hydroxylation:14.02;P24:Oxidation or Hydroxylation:14.02
Sample 1	2	4	Collagen alpha-1(I) chain OS=Gallus gallus GN=COL1A1 PE=1 SV=3	P02457|CO1A1_CHICK	R.GAP(+15.99)GPP(+15.99)GAVGAAGKDGEAGAQGPPGPTGPAGER.G	Y	18.65	2839.35	33	2.1	947.459	3	13.98		F25:136	1	588	620	Oxidation or Hydroxylation	P3:Oxidation or Hydroxylation:14.04;P6:Oxidation or Hydroxylation:0.00
Sample 1	1	1	Collagen alpha-2(I) chain OS=Gallus gallus GN=COL1A2 PE=4 SV=1	tr|F1P0H9|F1P0H9_CHICK	R.GASGPVGAKGPN(+.98)GDAGRP(+15.99)GEP(+15.99)GLMGPR.G	Y	35.53	2491.19	27	1.1	623.805	4	14.22		F25:143	2	423	449	Deamidation (NQ); Oxidation or Hydroxylation	N12:Deamidation (NQ):1000.00;P18:Oxidation or Hydroxylation:0.00;P21:Oxidation or Hydroxylation:6.65
Sample 1	1	1	Collagen alpha-2(I) chain OS=Gallus gallus GN=COL1A2 PE=4 SV=1	tr|F1P0H9|F1P0H9_CHICK	R.GPSGPPGP(+15.99)DGN(+15.99)KGEPGNVGPAGAP(+15.99)GPAGPGGIP(+15.99)GER.G	Y	20.6	3191.49	36	1.2	1064.84	3	15.04		F25:162	1	609	644	Oxidation or Hydroxylation	P8:Oxidation or Hydroxylation:0.00;N11:Oxidation or Hydroxylation:0.00;P24:Oxidation or Hydroxylation:17.01;P33:Oxidation or Hydroxylation:0.00
Sample 1	1	1	Collagen alpha-2(I) chain OS=Gallus gallus GN=COL1A2 PE=4 SV=1	tr|F1P0H9|F1P0H9_CHICK	R.VGP(+15.99)P(+15.99)GPAGITGPP(+15.99)GPP(+15.99)GPAGK.D	Y	21.27	1840.93	21	1.4	921.475	2	15.68		F25:179	1	794	814	Oxidation or Hydroxylation	P3:Oxidation or Hydroxylation:32.97;P4:Oxidation or Hydroxylation:22.85;P13:Oxidation or Hydroxylation:12.28;P16:Oxidation or Hydroxylation:0.00
Sample 1	1	1	Collagen alpha-2(I) chain OS=Gallus gallus GN=COL1A2 PE=4 SV=1	tr|F1P0H9|F1P0H9_CHICK	R.GLP(+15.99)GAIGAP(+15.99)GPAGGAGDRGEGGPAGPAGPAGAR.G	Y	23.23	2724.33	33	1.2	909.119	3	16.04		F25:188	3	675	707	Oxidation or Hydroxylation	P3:Oxidation or Hydroxylation:99.62;P9:Oxidation or Hydroxylation:26.31
Sample 1	1	1	Collagen alpha-2(I) chain OS=Gallus gallus GN=COL1A2 PE=4 SV=1	tr|F1P0H9|F1P0H9_CHICK	R.GPP(+15.99)GPSGPPGKDGRN(+.98)GLP(+15.99)GPIGPAGVR.G	Y	36.95	2493.27	27	0.6	624.326	4	16.09		F25:190	5	1053	1079	Oxidation or Hydroxylation; Deamidation (NQ)	P3:Oxidation or Hydroxylation:12.28;N15:Deamidation (NQ):1000.00;P18:Oxidation or Hydroxylation:9.86
Sample 1	1	1	Collagen alpha-2(I) chain OS=Gallus gallus GN=COL1A2 PE=4 SV=1	tr|F1P0H9|F1P0H9_CHICK	R.GPPGPSGPPGKDGRN(+.98)GLP(+15.99)GPIGPAGVR.G	Y	36.37	2477.28	27	0.9	620.327	4	16.6		F25:203	2	1053	1079	Deamidation (NQ); Oxidation or Hydroxylation	N15:Deamidation (NQ):1000.00;P18:Oxidation or Hydroxylation:0.00
Sample 1	2	4	Collagen alpha-1(I) chain OS=Gallus gallus GN=COL1A1 PE=1 SV=3	P02457|CO1A1_CHICK	R.GLTGPIGPP(+15.99)GPAGAP(+15.99)GDKGEAGP(+15.99)PGPAGPTGAR.G	Y	27.79	2878.42	33	1.9	960.483	3	16.69		F25:206	1	753	785	Oxidation or Hydroxylation	P9:Oxidation or Hydroxylation:0.00;P15:Oxidation or Hydroxylation:0.00;P23:Oxidation or Hydroxylation:0.00
Sample 1	1	1	Collagen alpha-2(I) chain OS=Gallus gallus GN=COL1A2 PE=4 SV=1	tr|F1P0H9|F1P0H9_CHICK	R.GLHGEFGVP(+15.99)GPAGPR.G	Y	16.35	1462.73	15	0.6	488.585	3	16.74		F25:208	1	573	587	Oxidation or Hydroxylation	P9:Oxidation or Hydroxylation:32.28
Sample 1	2	4	Collagen alpha-1(I) chain OS=Gallus gallus GN=COL1A1 PE=1 SV=3	P02457|CO1A1_CHICK	R.GLTGPIGPP(+15.99)GPAGAPGD(+15.99)KGEAGP(+15.99)PGPAGPTGAR.G	Y	33.31	2878.42	33	2	960.483	3	16.96		F25:215	1	753	785	Oxidation or Hydroxylation	P9:Oxidation or Hydroxylation:14.02;D17:Oxidation or Hydroxylation:0.00;P23:Oxidation or Hydroxylation:0.00
Sample 1	2	4	Collagen alpha-1(I) chain OS=Gallus gallus GN=COL1A1 PE=1 SV=3	P02457|CO1A1_CHICK	R.GPP(+15.99)GPMGPP(+15.99)GLAGPP(+15.99)GEAGR.E	Y	27.19	1815.86	20	1.6	908.937	2	17.41		F25:229	1	984	1003	Oxidation or Hydroxylation	P3:Oxidation or Hydroxylation:17.01;P9:Oxidation or Hydroxylation:0.00;P15:Oxidation or Hydroxylation:12.28
Sample 1	1	1	Collagen alpha-2(I) chain OS=Gallus gallus GN=COL1A2 PE=4 SV=1	tr|F1P0H9|F1P0H9_CHICK	K.GETGPAGPP(+15.99)GFQGLP(+15.99)GPSGPAGEAGKPGER(+15.99).G	Y	41.32	2776.31	30	1.4	926.444	3	18.16		F25:251	3	543	572	Oxidation or Hydroxylation	P9:Oxidation or Hydroxylation:14.02;P15:Oxidation or Hydroxylation:11.10;R30:Oxidation or Hydroxylation:8.26
Sample 1	1	1	Collagen alpha-2(I) chain OS=Gallus gallus GN=COL1A2 PE=4 SV=1	tr|F1P0H9|F1P0H9_CHICK	R.VGPIGPAGNRGEP(+15.99)GNIGFPGP(+15.99)K.G	Y	28.93	2119.08	22	1	707.368	3	18.49		F25:260	2	476	497	Oxidation or Hydroxylation	P13:Oxidation or Hydroxylation:11.10;P21:Oxidation or Hydroxylation:0.00
Sample 1	2	4	Collagen alpha-1(I) chain OS=Gallus gallus GN=COL1A1 PE=1 SV=3	P02457|CO1A1_CHICK	R.GFSGLQGPP(+15.99)GPP(+15.99)GAP(+15.99)GEQGPSGASGPAGPR.G	Y	32.51	2688.25	30	1.2	1345.14	2	18.67		F25:266	3	1101	1130	Oxidation or Hydroxylation	P9:Oxidation or Hydroxylation:8.69;P12:Oxidation or Hydroxylation:8.69;P15:Oxidation or Hydroxylation:25.70
Sample 1	2	4	Collagen alpha-1(I) chain OS=Gallus gallus GN=COL1A1 PE=1 SV=3	P02457|CO1A1_CHICK	R.GQAGVMGFPGPK(+15.99).G	Y	40.21	1160.56	12	0.8	581.29	2	18.84		F25:272	3	564	575	Oxidation or Hydroxylation	K12:Oxidation or Hydroxylation:0.00
Sample 1	2	4	Collagen alpha-1(I) chain OS=Gallus gallus GN=COL1A1 PE=1 SV=3	P02457|CO1A1_CHICK	R.GLP(+15.99)GTAGLP(+15.99)GMK.G	Y	23.75	1129.58	12	0.8	565.798	2	18.99		F25:276	1	243	254	Oxidation or Hydroxylation	P3:Oxidation or Hydroxylation:59.08;P9:Oxidation or Hydroxylation:0.00
Sample 1	2	4	Collagen alpha-1(I) chain OS=Gallus gallus GN=COL1A1 PE=1 SV=3	P02457|CO1A1_CHICK	R.GQAGVMGFP(+15.99)GPK.G	Y	40.93	1160.56	12	0.9	581.29	2	19.08		F25:279	1	564	575	Oxidation or Hydroxylation	P9:Oxidation or Hydroxylation:0.00
Sample 1	1	1	Collagen alpha-2(I) chain OS=Gallus gallus GN=COL1A2 PE=4 SV=1	tr|F1P0H9|F1P0H9_CHICK	R.VGPIGPAGN(+.98)RGEPGN(+15.99)IGFP(+15.99)GPK.G	Y	20.91	2120.06	22	-0.2	707.695	3	19.11		F25:280	1	476	497	Deamidation (NQ); Oxidation or Hydroxylation	N9:Deamidation (NQ):16.36;N15:Oxidation or Hydroxylation:0.00;P19:Oxidation or Hydroxylation:0.00
Sample 1	1	1	Collagen alpha-2(I) chain OS=Gallus gallus GN=COL1A2 PE=4 SV=1	tr|F1P0H9|F1P0H9_CHICK	K.GPK(+15.99)GETGPTGAIGPIGASGPP(+15.99)GPVGAAGPAGPR.G	Y	38.66	2836.45	33	1.6	946.491	3	19.27		F25:284	1	744	776	Oxidation or Hydroxylation	K3:Oxidation or Hydroxylation:0.00;P21:Oxidation or Hydroxylation:14.04
Sample 1	1	1	Collagen alpha-2(I) chain OS=Gallus gallus GN=COL1A2 PE=4 SV=1	tr|F1P0H9|F1P0H9_CHICK	K.GAAGLP(+15.99)GVAGAP(+15.99)GLPGP(+15.99)R.G	Y	29.74	1561.82	18	1.2	781.919	2	19.36		F25:287	2	309	326	Oxidation or Hydroxylation	P6:Oxidation or Hydroxylation:83.24;P12:Oxidation or Hydroxylation:23.15;P17:Oxidation or Hydroxylation:0.00
Sample 1	1	1	Collagen alpha-2(I) chain OS=Gallus gallus GN=COL1A2 PE=4 SV=1	tr|F1P0H9|F1P0H9_CHICK	K.GPKGETGPTGAIGPIGASGPP(+15.99)GPVGAAGPAGPR.G	Y	34.93	2820.45	33	1.1	941.159	3	19.38		F25:288	2	744	776	Oxidation or Hydroxylation	P21:Oxidation or Hydroxylation:12.28
Sample 1	1	1	Collagen alpha-2(I) chain OS=Gallus gallus GN=COL1A2 PE=4 SV=1	tr|F1P0H9|F1P0H9_CHICK	K.GP(+15.99)KGETGPTGAIGPIGASGPP(+15.99)GPVGAAGPAGPR.G	Y	33.41	2836.45	33	1.1	946.49	3	19.41		F25:289	2	744	776	Oxidation or Hydroxylation	P2:Oxidation or Hydroxylation:0.00;P21:Oxidation or Hydroxylation:14.02
Sample 1	1	1	Collagen alpha-2(I) chain OS=Gallus gallus GN=COL1A2 PE=4 SV=1	tr|F1P0H9|F1P0H9_CHICK	R.VGPIGPAGN(+15.99)RGEPGN(+.98)IGFP(+15.99)GPK.G	Y	28.83	2120.06	22	1.2	707.696	3	19.44		F25:290	1	476	497	Oxidation or Hydroxylation; Deamidation (NQ)	N9:Oxidation or Hydroxylation:0.00;N15:Deamidation (NQ):0.00;P19:Oxidation or Hydroxylation:9.42
Sample 1	1	1	Collagen alpha-2(I) chain OS=Gallus gallus GN=COL1A2 PE=4 SV=1	tr|F1P0H9|F1P0H9_CHICK	R.N(+.98)GLP(+15.99)GPIGPAGVR.G	Y	26.84	1220.65	13	0.9	611.333	2	19.86		F25:301	1	1067	1079	Deamidation (NQ); Oxidation or Hydroxylation	N1:Deamidation (NQ):1000.00;P4:Oxidation or Hydroxylation:51.51
Sample 1	1	1	Collagen alpha-2(I) chain OS=Gallus gallus GN=COL1A2 PE=4 SV=1	tr|F1P0H9|F1P0H9_CHICK	R.GSDGSAGPTGPAGPIGAAGPP(+15.99)GFP(+15.99)GAP(+15.99)GAK.G	Y	27.66	2520.19	30	1.8	1261.1	2	20.57		F25:319	1	234	263	Oxidation or Hydroxylation	P21:Oxidation or Hydroxylation:10.11;P24:Oxidation or Hydroxylation:0.00;P27:Oxidation or Hydroxylation:0.00
Sample 1	1	1	Collagen alpha-2(I) chain OS=Gallus gallus GN=COL1A2 PE=4 SV=1	tr|F1P0H9|F1P0H9_CHICK	D.PGPVGPVGPAGAFGPR.G	Y	19.9	1431.76	16	1.1	716.889	2	22.19		F25:354	1	980	995
Sample 1	1	1	Collagen alpha-2(I) chain OS=Gallus gallus GN=COL1A2 PE=4 SV=1	tr|F1P0H9|F1P0H9_CHICK	R.GDPGPVGPVGPAGAFGPR.G	Y	37.89	1603.81	18	1.3	802.914	2	22.43		F25:359	2	978	995
Sample 1	1	1	Collagen alpha-2(I) chain OS=Gallus gallus GN=COL1A2 PE=4 SV=1	tr|F1P0H9|F1P0H9_CHICK	R.GLP(+15.99)GIAGATGEP(+15.99)GPLGVSGPPGAR(+15.99).G	Y	25.77	2132.09	24	1.2	1067.05	2	22.45		F25:360	2	882	905	Oxidation or Hydroxylation	P3:Oxidation or Hydroxylation:81.27;P12:Oxidation or Hydroxylation:0.00;R24:Oxidation or Hydroxylation:0.00
Sample 1	1	1	Collagen alpha-2(I) chain OS=Gallus gallus GN=COL1A2 PE=4 SV=1	tr|F1P0H9|F1P0H9_CHICK	R.GFP(+15.99)GTP(+15.99)GLPGF(+15.99)K.G	Y	21.55	1221.6	12	0.7	611.809	2	22.51		F25:362	2	165	176	Oxidation or Hydroxylation	P3:Oxidation or Hydroxylation:14.02;P6:Oxidation or Hydroxylation:22.45;F11:Oxidation or Hydroxylation:0.00
Sample 1	3	85	Uncharacterized protein OS=Gallus gallus GN=COL4A6 PE=4 SV=2	tr|F1P3T8|F1P3T8_CHICK	R.GDVGPPGLPVLGAQEQ(+.98)A.L	Y	23.29	1604.8	17	6.9	803.415	2	22.55		F25:363	1	957	973	Deamidation (NQ)	Q16:Deamidation (NQ):6.59
Sample 1	1	1	Collagen alpha-2(I) chain OS=Gallus gallus GN=COL1A2 PE=4 SV=1	tr|F1P0H9|F1P0H9_CHICK	K.AADFGPGPM(+15.99)GLMGPR.G	Y	42.28	1488.69	15	2.7	745.352	2	26.82		F25:409	1	84	98	Oxidation (M)	M9:Oxidation (M):28.73
Sample 1	1	1	Collagen alpha-2(I) chain OS=Gallus gallus GN=COL1A2 PE=4 SV=1	tr|F1P0H9|F1P0H9_CHICK	K.AADFGPGPMGLMGPR.G	Y	38.91	1472.69	15	2.1	737.354	2	27.47		F25:417	3	84	98
Sample 1	5	6	Apolipoprotein A-I OS=Gallus gallus GN=APOA1 PE=1 SV=2	P08250|APOA1_CHICK	R.LISFLDELQK.S	Y	20.2	1204.67	10	0.6	603.343	2	30.25		F25:441	1	252	261
Sample 1	4	21	Uncharacterized protein OS=Gallus gallus GN=VTN PE=4 SV=2	tr|E1C7A7|E1C7A7_CHICK	K.LISDVWGIEGPIDAAFTR.I	Y	29.82	1959.01	18	1.2	980.514	2	34.58		F25:476	1	193	210
Sample 1	4	20	Vitronectin OS=Gallus gallus PE=2 SV=1	tr|O12945|O12945_CHICK	K.LISDVWGIEGPIDAAFTR.I	Y	29.82	1959.01	18	1.2	980.514	2	34.58		F25:476	1	193	210
Sample 1	2	4	Collagen alpha-1(I) chain OS=Gallus gallus GN=COL1A1 PE=1 SV=3	P02457|CO1A1_CHICK	R.G(+42.01)APGDR(-.98).G	Y	26.1	612.298	6	-8.3	613.3	1	45.11		F25:553	1	786	791	Acetylation (N-term); Amidation	G1:Acetylation (N-term):1000.00;R6:Amidation:1000.00
Sample 2	2	4	Collagen alpha-1(I) chain OS=Gallus gallus GN=COL1A1 PE=1 SV=3	P02457|CO1A1_CHICK	R.GSAGPP(+15.99)GATGFP(+15.99)GAAGR.V	Y	39.73	1458.69	17	1.1	730.351	2	14.8		F26:161	1	855	871	Oxidation or Hydroxylation	P6:Oxidation or Hydroxylation:17.01;P12:Oxidation or Hydroxylation:40.00
Sample 2	2	4	Collagen alpha-1(I) chain OS=Gallus gallus GN=COL1A1 PE=1 SV=3	P02457|CO1A1_CHICK	R.GEPGP(+15.99)AGLP(+15.99)GPAGER.G	Y	19.9	1392.66	15	0.9	697.34	2	14.83		F26:162	1	462	476	Oxidation or Hydroxylation	P5:Oxidation or Hydroxylation:14.04;P9:Oxidation or Hydroxylation:0.00
Sample 2	1	1	Collagen alpha-2(I) chain OS=Gallus gallus GN=COL1A2 PE=4 SV=1	tr|F1P0H9|F1P0H9_CHICK	R.GLHGEFGVP(+15.99)GPAGPRGER.G	Y	32.68	1804.9	18	0.7	602.64	3	15.26		F26:172	1	573	590	Oxidation or Hydroxylation	P9:Oxidation or Hydroxylation:0.00
Sample 2	2	4	Collagen alpha-1(I) chain OS=Gallus gallus GN=COL1A1 PE=1 SV=3	P02457|CO1A1_CHICK	R.GFP(+15.99)GADGIAGPKGPP(+15.99)GER.G	Y	34.1	1710.83	18	1.1	856.424	2	15.85		F26:183	1	483	500	Oxidation or Hydroxylation	P3:Oxidation or Hydroxylation:17.01;P15:Oxidation or Hydroxylation:0.00
Sample 2	1	1	Collagen alpha-2(I) chain OS=Gallus gallus GN=COL1A2 PE=4 SV=1	tr|F1P0H9|F1P0H9_CHICK	R.GLP(+15.99)GAIGAPGP(+15.99)AGGAGDRGEGGPAGPAGPAGAR.G	Y	22.05	2724.33	33	1.3	909.119	3	16.42		F26:197	1	675	707	Oxidation or Hydroxylation	P3:Oxidation or Hydroxylation:90.57;P11:Oxidation or Hydroxylation:8.22
Sample 2	1	1	Collagen alpha-2(I) chain OS=Gallus gallus GN=COL1A2 PE=4 SV=1	tr|F1P0H9|F1P0H9_CHICK	K.GEIGPAGNVGPTGPAGPR.G	Y	37.84	1602.81	18	1.1	802.414	2	16.85		F26:206	1	264	281
Sample 2	2	4	Collagen alpha-1(I) chain OS=Gallus gallus GN=COL1A1 PE=1 SV=3	P02457|CO1A1_CHICK	K.GSPGAD(+15.99)GPIGAP(+15.99)GTP(+15.99)GPQGIAGQR.G	Y	24.15	2162.04	24	1.9	1082.03	2	16.88		F26:207	2	924	947	Oxidation or Hydroxylation	D6:Oxidation or Hydroxylation:6.63;P12:Oxidation or Hydroxylation:23.70;P15:Oxidation or Hydroxylation:8.22
Sample 2	2	4	Collagen alpha-1(I) chain OS=Gallus gallus GN=COL1A1 PE=1 SV=3	P02457|CO1A1_CHICK	R.GLTGPIGPPGP(+15.99)AGAPGD(+15.99)KGEAGPP(+15.99)GPAGPTGAR.G	Y	28.52	2878.42	33	2	960.483	3	16.94		F26:209	1	753	785	Oxidation or Hydroxylation	P11:Oxidation or Hydroxylation:0.00;D17:Oxidation or Hydroxylation:0.00;P24:Oxidation or Hydroxylation:17.01
Sample 2	1	1	Collagen alpha-2(I) chain OS=Gallus gallus GN=COL1A2 PE=4 SV=1	tr|F1P0H9|F1P0H9_CHICK	K.EGPVGFP(+15.99)GADGR.V	Y	41.52	1173.54	12	0.6	587.778	2	17		F26:211	2	464	475	Oxidation or Hydroxylation	P7:Oxidation or Hydroxylation:7.65
Sample 2	2	4	Collagen alpha-1(I) chain OS=Gallus gallus GN=COL1A1 PE=1 SV=3	P02457|CO1A1_CHICK	R.GLTGPIGPP(+15.99)GPAGAP(+15.99)GDKGEAGPP(+15.99)GPAGPTGAR.G	Y	32.3	2878.42	33	2	960.483	3	17.22		F26:215	1	753	785	Oxidation or Hydroxylation	P9:Oxidation or Hydroxylation:0.00;P15:Oxidation or Hydroxylation:0.00;P24:Oxidation or Hydroxylation:12.28
Sample 2	2	4	Collagen alpha-1(I) chain OS=Gallus gallus GN=COL1A1 PE=1 SV=3	P02457|CO1A1_CHICK	K.GATGAP(+15.99)GIAGAP(+15.99)GFPGAR(+15.99).G	Y	24.14	1571.77	18	1.5	786.893	2	17.35		F26:219	1	387	404	Oxidation or Hydroxylation	P6:Oxidation or Hydroxylation:63.64;P12:Oxidation or Hydroxylation:0.00;R18:Oxidation or Hydroxylation:16.66
Sample 2	2	4	Collagen alpha-1(I) chain OS=Gallus gallus GN=COL1A1 PE=1 SV=3	P02457|CO1A1_CHICK	R.GFP(+15.99)GADGIAGPK.G	Y	36.22	1101.55	12	1	551.78	2	17.75		F26:227	2	483	494	Oxidation or Hydroxylation	P3:Oxidation or Hydroxylation:17.01
Sample 2	1	1	Collagen alpha-2(I) chain OS=Gallus gallus GN=COL1A2 PE=4 SV=1	tr|F1P0H9|F1P0H9_CHICK	R.GLP(+15.99)GESGAVGPAGPIGSR.G	Y	32.49	1593.81	18	1.6	797.914	2	18.08		F26:233	1	591	608	Oxidation or Hydroxylation	P3:Oxidation or Hydroxylation:66.64
Sample 2	1	1	Collagen alpha-2(I) chain OS=Gallus gallus GN=COL1A2 PE=4 SV=1	tr|F1P0H9|F1P0H9_CHICK	R.GDAGPP(+15.99)GMTGFP(+15.99)GAAGR.V	Y	35.55	1546.68	17	0.8	774.35	2	18.39		F26:243	1	777	793	Oxidation or Hydroxylation	P6:Oxidation or Hydroxylation:17.01;P12:Oxidation or Hydroxylation:23.70
Sample 2	1	1	Collagen alpha-2(I) chain OS=Gallus gallus GN=COL1A2 PE=4 SV=1	tr|F1P0H9|F1P0H9_CHICK	K.GETGPAGPPGF(+15.99)QGLP(+15.99)GPSGPAGEAGKP(+15.99)GER.G	Y	30.12	2776.31	30	1.6	926.444	3	18.49		F26:246	1	543	572	Oxidation or Hydroxylation	F11:Oxidation or Hydroxylation:0.00;P15:Oxidation or Hydroxylation:0.00;P27:Oxidation or Hydroxylation:0.00
Sample 2	1	1	Collagen alpha-2(I) chain OS=Gallus gallus GN=COL1A2 PE=4 SV=1	tr|F1P0H9|F1P0H9_CHICK	R.VGPIGPAGNRGEP(+15.99)GNIGFP(+15.99)GPK.G	Y	22.82	2119.08	22	1.1	707.368	3	18.75		F26:251	3	476	497	Oxidation or Hydroxylation	P13:Oxidation or Hydroxylation:0.00;P19:Oxidation or Hydroxylation:7.32
Sample 2	2	4	Collagen alpha-1(I) chain OS=Gallus gallus GN=COL1A1 PE=1 SV=3	P02457|CO1A1_CHICK	R.GFP(+15.99)GLP(+15.99)GPSGEP(+15.99)GK.Q	Y	19.04	1343.64	14	1	672.826	2	18.82		F26:253	1	960	973	Oxidation or Hydroxylation	P3:Oxidation or Hydroxylation:17.01;P6:Oxidation or Hydroxylation:14.04;P12:Oxidation or Hydroxylation:11.12
Sample 2	2	4	Collagen alpha-1(I) chain OS=Gallus gallus GN=COL1A1 PE=1 SV=3	P02457|CO1A1_CHICK	R.GFSGLQGP(+15.99)PGPP(+15.99)GAP(+15.99)GEQGPSGASGPAGPR.G	Y	17.72	2688.25	30	0.9	1345.13	2	19.03		F26:258	1	1101	1130	Oxidation or Hydroxylation	P8:Oxidation or Hydroxylation:0.00;P12:Oxidation or Hydroxylation:14.02;P15:Oxidation or Hydroxylation:33.81
Sample 2	1	1	Collagen alpha-2(I) chain OS=Gallus gallus GN=COL1A2 PE=4 SV=1	tr|F1P0H9|F1P0H9_CHICK	K.GAAGLP(+15.99)GVAGAP(+15.99)GLPGPR(+15.99).G	Y	21.81	1561.82	18	1.2	781.919	2	19.56		F26:269	1	309	326	Oxidation or Hydroxylation	P6:Oxidation or Hydroxylation:74.73;P12:Oxidation or Hydroxylation:12.33;R18:Oxidation or Hydroxylation:0.00
Sample 2	2	4	Collagen alpha-1(I) chain OS=Gallus gallus GN=COL1A1 PE=1 SV=3	P02457|CO1A1_CHICK	R.GFP(+15.99)GLP(+15.99)GPSGEPGK.Q	Y	32.14	1327.64	14	1	664.828	2	19.68		F26:273	2	960	973	Oxidation or Hydroxylation	P3:Oxidation or Hydroxylation:10.11;P6:Oxidation or Hydroxylation:33.18
Sample 2	1	1	Collagen alpha-2(I) chain OS=Gallus gallus GN=COL1A2 PE=4 SV=1	tr|F1P0H9|F1P0H9_CHICK	R.GLPGESGAVGPAGPIGSR.G	Y	16.97	1577.82	18	1.1	789.916	2	19.74		F26:275	1	591	608
Sample 2	1	1	Collagen alpha-2(I) chain OS=Gallus gallus GN=COL1A2 PE=4 SV=1	tr|F1P0H9|F1P0H9_CHICK	R.VGPIGPAGN(+.98)RGEP(+15.99)GNIGFP(+15.99)GPK.G	Y	26.36	2120.06	22	1.3	707.697	3	19.88		F26:278	1	476	497	Deamidation (NQ); Oxidation or Hydroxylation	N9:Deamidation (NQ):9.45;P13:Oxidation or Hydroxylation:0.00;P19:Oxidation or Hydroxylation:0.00
Sample 2	1	1	Collagen alpha-2(I) chain OS=Gallus gallus GN=COL1A2 PE=4 SV=1	tr|F1P0H9|F1P0H9_CHICK	K.GAAGLP(+15.99)GVAGAP(+15.99)GLP(+15.99)GPR.G	Y	18.04	1561.82	18	1.2	781.919	2	19.94		F26:280	1	309	326	Oxidation or Hydroxylation	P6:Oxidation or Hydroxylation:67.73;P12:Oxidation or Hydroxylation:10.19;P15:Oxidation or Hydroxylation:0.00
Sample 2	1	1	Collagen alpha-2(I) chain OS=Gallus gallus GN=COL1A2 PE=4 SV=1	tr|F1P0H9|F1P0H9_CHICK	R.GDP(+15.99)GPVGPVGPAGAFGPR.G	Y	42.75	1619.81	18	0.7	810.911	2	22.28		F26:314	3	978	995	Oxidation or Hydroxylation	P3:Oxidation or Hydroxylation:17.01
Sample 2	1	1	Collagen alpha-2(I) chain OS=Gallus gallus GN=COL1A2 PE=4 SV=1	tr|F1P0H9|F1P0H9_CHICK	R.GFP(+15.99)GTP(+15.99)GLP(+15.99)GFK.G	Y	21.05	1221.6	12	0.7	611.809	2	22.31		F26:315	1	165	176	Oxidation or Hydroxylation	P3:Oxidation or Hydroxylation:17.01;P6:Oxidation or Hydroxylation:25.58;P9:Oxidation or Hydroxylation:5.99
Sample 2	1	1	Collagen alpha-2(I) chain OS=Gallus gallus GN=COL1A2 PE=4 SV=1	tr|F1P0H9|F1P0H9_CHICK	R.GLP(+15.99)GIAGATGEP(+15.99)GPLGVSGP(+15.99)PGAR.G	Y	17.88	2132.09	24	1.4	1067.05	2	22.91		F26:323	1	882	905	Oxidation or Hydroxylation	P3:Oxidation or Hydroxylation:44.44;P12:Oxidation or Hydroxylation:14.04;P20:Oxidation or Hydroxylation:0.00
Sample 2	1	1	Collagen alpha-2(I) chain OS=Gallus gallus GN=COL1A2 PE=4 SV=1	tr|F1P0H9|F1P0H9_CHICK	K.AADFGPGPM(+15.99)GLM(+15.99)GPR.G	Y	32.2	1504.68	15	1.1	753.348	2	27.23		F26:362	2	84	98	Oxidation (M)	M9:Oxidation (M):1000.00;M12:Oxidation (M):1000.00
Sample 2	1	1	Collagen alpha-2(I) chain OS=Gallus gallus GN=COL1A2 PE=4 SV=1	tr|F1P0H9|F1P0H9_CHICK	A.Q(-17.03)YDP(+15.99)SKAADFGPGPMGLMGPR.G	Y	24.79	2189.99	21	0.7	1096	2	28.93		F26:377	1	78	98	Pyro-glu from Q; Oxidation or Hydroxylation	Q1:Pyro-glu from Q:1000.00;P4:Oxidation or Hydroxylation:0.00
